# Supplementary material for: Comparative functional genomics identifies unique molecular features of EPSCs
Source: Life Sci Alliance. 2022 Aug 12;5(11):e202201608. doi: 10.26508/lsa.202201608 (PMC9378845; doi:10.26508/lsa.202201608)
Supplement: Supplementary file 2 [file LSA-2022-01608_TableS2.xlsx]

## Sheet: 2A-ESCvsDEPSC
chr	Start	End	PeakID	ESC_DEPSC_logFC	ESC_DEPSC_FDR	Normalized_reads_ESC	Normalized_reads_DEPSC	Normalized_reads_LEPSC	status
chr1	10021774	10022174	Peak1	1.26103	0.000317545	6.10458	4.50075	4.01596	EO_DC
chr1	100372995	100373395	Peak4	1.34591	0.00067755	5.4538	3.56416	4.86382	EO_DC
chr1	100563975	100564375	Peak5	1.14626	0.00135884	5.88781	4.39847	4.58623	EO_DC
chr1	103815419	103815819	Peak15	0.681949	0.0271309	6.21186	5.39793	6.25598	EO_DC
chr1	104152507	104152907	Peak17	1.0633	0.00511924	5.49914	4.04201	4.68087	EO_DC
chr1	104707936	104708336	Peak22	1.29654	0.000557204	5.52953	3.79478	5.75013	EO_DC
chr1	105465093	105465493	Peak26	1.16352	0.00629604	5.00776	3.1317	4.809	EO_DC
chr1	107631728	107632128	Peak36	1.03908	0.01282	4.98679	3.3638	4.30505	EO_DC
chr1	108005960	108006360	Peak44	1.07463	0.00781028	5.2124	3.62582	4.2858	EO_DC
chr1	108460961	108461361	Peak51	0.862283	0.0314728	5.38827	4.12781	4.10538	EO_DC
chr1	114122126	114122526	Peak78	1.12317	0.0072124	5.11399	3.3649	4.11394	EO_DC
chr1	114349159	114349559	Peak80	1.15251	0.00663676	4.69895	2.84867	5.04917	EO_DC
chr1	11491693	11492093	Peak84	1.2207	0.00135628	5.65936	3.9932	4.97962	EO_DC
chr1	116538298	116538698	Peak88	1.03376	0.00907653	5.33581	3.84749	4.38219	EO_DC
chr1	116746193	116746593	Peak89	0.633212	0.0308569	6.52129	5.78222	6.17298	EO_DC
chr1	120299238	120299638	Peak109	0.774463	0.0453942	5.24756	4.17044	5.08898	EO_DC
chr1	120539187	120539587	Peak117	0.928741	0.00233251	6.25751	5.14944	6.23129	EO_DC
chr1	120770283	120770683	Peak123	1.03074	0.00499471	5.69762	4.32743	5.24436	EO_DC
chr1	120961426	120961826	Peak130	0.753462	0.0470916	5.38946	4.36297	4.95458	EO_DC
chr1	127429739	127430139	Peak205	0.763707	0.0113893	6.54671	5.64095	6.03153	EO_DC
chr1	127584511	127584911	Peak210	1.12231	0.0025035	5.58824	4.08488	5.13716	EO_DC
chr1	127626167	127626567	Peak212	1.64951	9.72717e-06	5.96774	3.84907	5.08978	EO_DC
chr1	129067509	129067909	Peak223	1.50633	0.0002466	5.37052	3.2094	5.16979	EO_DC
chr1	130333917	130334317	Peak249	1.13653	0.00482456	5.23088	3.56512	4.23435	EO_DC
chr1	130355964	130356364	Peak250	1.44603	0.000238991	5.61723	3.62674	4.58737	EO_DC
chr1	13074996	13075396	Peak255	1.66057	2.5814e-09	6.9392	5.06394	6.80084	EO_DC
chr1	132634089	132634489	Peak277	1.22712	0.00197874	5.54374	3.79478	4.11978	EO_DC
chr1	135244005	135244405	Peak387	0.924065	0.0248417	5.09742	3.68672	4.35769	EO_DC
chr1	135345012	135345412	Peak397	0.740404	0.0326482	5.86433	4.92462	4.94803	EO_DC
chr1	135424451	135424851	Peak400	1.09309	0.00450205	5.55761	4.04132	4.58623	EO_DC
chr1	135591004	135591404	Peak406	0.743352	0.00470313	6.91581	6.07428	6.38638	EO_DC
chr1	135638623	135639023	Peak409	0.870854	0.0252233	5.35569	4.12976	4.46338	EO_DC
chr1	136085627	136086027	Peak426	0.759423	0.0128753	6.46933	5.56512	4.92577	EO_DC
chr1	137363520	137363920	Peak481	0.78061	0.0274361	5.80248	4.79518	4.96022	EO_DC
chr1	137572277	137572677	Peak495	0.630542	0.0132786	6.99533	6.28896	6.42775	EO_DC
chr1	137677554	137677954	Peak509	1.28415	0.00088837	5.71368	3.94821	3.79348	EO_DC
chr1	138752785	138753185	Peak556	0.824343	0.0438635	4.92069	3.68451	4.78714	EO_DC
chr1	13931777	13932177	Peak563	1.04121	0.018972	4.43638	2.36435	3.98135	EO_DC
chr1	140853406	140853806	Peak573	0.973387	0.0255178	4.46653	2.74049	4.23973	EO_DC
chr1	141308827	141309227	Peak579	1.11468	0.00399971	5.40324	3.84828	4.79811	EO_DC
chr1	142085057	142085457	Peak586	0.776565	0.0226623	5.8509	4.87392	5.80802	EO_DC
chr1	14282379	14282779	Peak591	1.07759	0.003177	5.75238	4.32715	4.87581	EO_DC
chr1	14302559	14302959	Peak594	0.907398	0.0308662	4.87443	3.43232	4.43808	EO_DC
chr1	145402616	145403016	Peak599	0.677626	0.0424984	5.96774	5.12911	5.4002	EO_DC
chr1	14733181	14733581	Peak613	1.42636	6.85531e-05	5.81619	3.99498	5.93031	EO_DC
chr1	152344078	152344478	Peak626	0.735349	0.014241	6.67794	5.80986	5.43511	EO_DC
chr1	153024583	153024983	Peak637	0.632563	0.0286427	6.59662	5.86194	6.07263	EO_DC
chr1	153391652	153392052	Peak652	1.23704	0.000788073	5.63021	3.99569	5.56029	EO_DC
chr1	154261733	154262133	Peak670	0.99138	0.012657	5.22982	3.79478	4.64301	EO_DC
chr1	154358390	154358790	Peak671	0.912609	0.0229183	5.13263	3.796	4.68482	EO_DC
chr1	154471856	154472256	Peak674	0.651704	0.0486127	6.01222	5.21109	5.53706	EO_DC
chr1	154568735	154569135	Peak675	1.21074	0.00340397	5.19205	3.3627	3.95369	EO_DC
chr1	154640871	154641271	Peak680	0.734236	0.0252095	5.94489	5.0427	6.4169	EO_DC
chr1	154856435	154856835	Peak693	0.68115	0.0155787	6.5822	5.79651	6.6797	EO_DC
chr1	154878514	154878914	Peak694	1.11594	0.00144308	5.86314	4.43364	5.32657	EO_DC
chr1	155947599	155947999	Peak736	0.954573	0.017274	5.19341	3.79396	4.7585	EO_DC
chr1	156052178	156052578	Peak741	0.862786	0.0183309	5.64506	4.50201	4.89977	EO_DC
chr1	158606341	158606741	Peak794	0.891467	0.019882	5.31938	4.08588	5.02843	EO_DC
chr1	158913570	158913970	Peak804	0.935849	0.00970982	5.63061	4.39928	5.34096	EO_DC
chr1	159009502	159009902	Peak808	0.879807	0.00361658	6.59375	5.54917	6.12889	EO_DC
chr1	159216696	159217096	Peak811	0.871352	0.0249959	5.43638	4.21094	3.5501	EO_DC
chr1	162970207	162970607	Peak850	0.745507	0.0219694	6.06363	5.1504	5.57254	EO_DC
chr1	163090395	163090795	Peak855	0.865826	0.0240804	5.45131	4.25152	4.40976	EO_DC
chr1	166835227	166835627	Peak910	0.789706	0.0487748	5.2314	4.08421	4.35274	EO_DC
chr1	168308985	168309385	Peak952	0.640899	0.0213706	6.87544	6.14004	5.93904	EO_DC
chr1	169868266	169868666	Peak989	0.890968	0.0248366	5.13546	3.84946	4.80802	EO_DC
chr1	17230321	17230721	Peak1012	0.81265	0.040049	5.2486	4.08421	4.46338	EO_DC
chr1	17240825	17241225	Peak1015	0.630446	0.0311193	6.54491	5.80996	5.98035	EO_DC
chr1	172819448	172819848	Peak1028	0.856644	0.0226271	5.2486	4.08555	5.62109	EO_DC
chr1	174299015	174299415	Peak1102	0.734316	0.035837	5.88513	4.94858	5.59521	EO_DC
chr1	175911134	175911534	Peak1131	0.792291	0.0279452	5.63221	4.59579	5.09275	EO_DC
chr1	178574235	178574635	Peak1151	2.13271	1.47303e-07	6.1732	3.43337	3.98602	EO_DC
chr1	179649202	179649602	Peak1166	0.888323	0.0228409	5.1555	3.89911	5.30179	EO_DC
chr1	181066853	181067253	Peak1191	0.80363	0.0339939	5.38661	4.28983	5.03069	EO_DC
chr1	181298856	181299256	Peak1196	0.944735	0.022821	4.75293	3.28779	5.04834	EO_DC
chr1	182536999	182537399	Peak1237	1.00676	0.00729738	5.45221	4.08622	5.09788	EO_DC
chr1	18258904	18259304	Peak1240	0.913951	0.00679852	6.02195	4.87508	5.09492	EO_DC
chr1	182650413	182650813	Peak1242	0.767778	0.0365459	5.6743	4.65704	4.72648	EO_DC
chr1	183775304	183775704	Peak1280	0.722278	0.0127757	6.63835	5.7958	5.70243	EO_DC
chr1	185843155	185843555	Peak1325	0.858838	0.0172279	5.84046	4.71493	4.32404	EO_DC
chr1	186660287	186660687	Peak1339	1.3895	1.22854e-05	6.58896	4.92406	4.55442	EO_DC
chr1	186706581	186706981	Peak1343	0.630903	0.019882	6.94017	6.2221	6.15291	EO_DC
chr1	188065016	188065416	Peak1362	0.874595	0.0414604	4.50002	3.0427	4.53706	EO_DC
chr1	188085342	188085742	Peak1363	0.773205	0.0258137	5.4847	4.50075	6.40976	EO_DC
chr1	188187108	188187508	Peak1364	1.3997	0.00138511	4.8039	2.50125	4.7188	EO_DC
chr1	190678203	190678603	Peak1385	1.21139	0.00197874	5.60169	3.90025	4.6319	EO_DC
chr1	190966327	190966727	Peak1391	0.855633	0.0313026	5.13376	3.89835	4.7188	EO_DC
chr1	191563816	191564216	Peak1397	0.774669	0.0445091	5.28442	4.21124	4.74447	EO_DC
chr1	191602254	191602654	Peak1401	0.87779	0.0210973	5.33556	4.12911	5.24168	EO_DC
chr1	192838198	192838598	Peak1431	0.848643	0.0471025	4.43683	3.04201	4.90654	EO_DC
chr1	194339244	194339644	Peak1477	1.08854	0.00411747	5.48426	3.99569	4.95369	EO_DC
chr1	194346737	194347137	Peak1478	1.18672	0.00163424	5.64822	4.04235	5.55442	EO_DC
chr1	194571741	194572141	Peak1481	0.875677	0.0108183	5.93349	4.82358	5.1126	EO_DC
chr1	194590675	194591075	Peak1482	1.16331	0.00308492	5.38661	3.74006	5.00423	EO_DC
chr1	195313019	195313419	Peak1500	1.28034	0.000305363	6.0742	4.43469	4.31016	EO_DC
chr1	196918354	196918754	Peak1522	0.788585	0.00917972	6.4037	5.46771	5.66951	EO_DC
chr1	20964860	20965260	Peak1536	0.801692	0.0489664	4.87645	3.68407	4.96995	EO_DC
chr1	22473536	22473936	Peak1546	0.992905	0.00243203	6.21927	4.99445	5.90654	EO_DC
chr1	30035377	30035777	Peak1572	1.37152	0.000948059	5.4023	3.366	4.64301	EO_DC
chr1	30904511	30904911	Peak1577	1.44975	0.000260223	5.51431	3.50326	5.2825	EO_DC
chr1	30940675	30941075	Peak1580	1.5844	1.68339e-05	5.97934	3.94895	5.21539	EO_DC
chr1	33693348	33693748	Peak1591	0.706275	0.0334139	6.06482	5.19192	5.36508	EO_DC
chr1	34097956	34098356	Peak1606	0.882823	0.0259637	5.17142	3.90101	5.29476	EO_DC
chr1	34133918	34134318	Peak1612	0.905044	0.0148827	5.54353	4.32686	4.89977	EO_DC
chr1	35277136	35277536	Peak1640	0.763217	0.031126	5.48448	4.5	6.19628	EO_DC
chr1	35289386	35289786	Peak1641	0.74026	0.0190889	6.10559	5.21186	6.17821	EO_DC
chr1	36070659	36071059	Peak1650	1.35727	2.41022e-06	7.00181	5.43482	5.94803	EO_DC
chr1	36111472	36111872	Peak1652	1.15418	0.00191489	5.63221	4.08555	5.14369	EO_DC
chr1	37269254	37269654	Peak1706	0.96461	0.00944049	5.469	4.17044	5.12928	EO_DC
chr1	37728174	37728574	Peak1716	0.816592	0.039166	5.21293	4.04304	4.77709	EO_DC
chr1	38880831	38881231	Peak1738	1.56551	3.98929e-07	6.65818	4.82258	5.96833	EO_DC
chr1	39584241	39584641	Peak1761	0.901995	0.00879528	5.88781	4.74261	5.23166	EO_DC
chr1	40323411	40323811	Peak1780	0.797525	0.0251428	5.80408	4.77059	5.19766	EO_DC
chr1	4845553	4845953	Peak1838	1.29786	1.99399e-05	6.55249	5.01939	6.08273	EO_DC
chr1	5060300	5060700	Peak1849	0.743138	0.0351704	5.82873	4.87373	4.91328	EO_DC
chr1	51477838	51478238	Peak1854	0.875885	0.0424642	4.52888	3.04132	4.36395	EO_DC
chr1	55255527	55255927	Peak1924	0.758723	0.00818816	6.58209	5.69948	5.80851	EO_DC
chr1	55270382	55270782	Peak1925	1.47196	0.00033823	5.4847	3.36325	3.65404	EO_DC
chr1	57527182	57527582	Peak1939	1.13571	0.00214129	5.64367	4.12781	5.31966	EO_DC
chr1	57668943	57669343	Peak1941	0.766584	0.0466876	5.23114	4.16918	5.34663	EO_DC
chr1	58169704	58170104	Peak1947	0.730407	0.0419304	5.54438	4.59579	5.5289	EO_DC
chr1	58709405	58709805	Peak1956	0.785118	0.0394792	5.5448	4.46823	4.04079	EO_DC
chr1	59127754	59128154	Peak1968	0.720747	0.0458596	5.86211	4.92312	4.43214	EO_DC
chr1	59785376	59785776	Peak1993	1.16652	0.000249493	6.33667	4.92406	5.70243	EO_DC
chr1	60835596	60835996	Peak2009	0.965276	0.012805	5.30326	3.94784	4.78078	EO_DC
chr1	62711577	62711977	Peak2021	0.897497	0.00908032	5.76639	4.6272	5.88487	EO_DC
chr1	62783101	62783501	Peak2027	1.49055	1.73652e-05	6.45131	4.5972	4.24897	EO_DC
chr1	62784747	62785147	Peak2028	1.73411	9.77655e-06	5.97714	3.68672	4.45079	EO_DC
chr1	62789829	62790229	Peak2029	0.897638	0.0169053	5.54671	4.3263	4.603	EO_DC
chr1	62814197	62814597	Peak2030	0.80532	0.0127298	6.11356	5.12894	5.88191	EO_DC
chr1	6438802	6439202	Peak2071	1.5759	2.6059e-05	6.04272	3.99427	4.24897	EO_DC
chr1	65114383	65114783	Peak2087	0.776575	0.0482232	5.09481	3.99605	5.13506	EO_DC
chr1	71083554	71083954	Peak2122	0.882326	0.019197	5.45244	4.25152	4.9611	EO_DC
chr1	72219500	72219900	Peak2139	0.828279	0.0182657	5.65955	4.59556	5.55168	EO_DC
chr1	7261683	7262083	Peak2156	0.764123	0.0273586	5.9907	5.02044	5.62315	EO_DC
chr1	74141269	74141669	Peak2192	1.06573	0.00381306	5.63041	4.21063	5.05445	EO_DC
chr1	75585477	75585877	Peak2269	0.843276	0.00625759	6.35509	5.34447	5.62315	EO_DC
chr1	7661687	7662087	Peak2280	0.962629	0.00370109	6.09496	4.89968	5.17616	EO_DC
chr1	78598537	78598937	Peak2307	0.99814	0.00195036	6.2399	5.01886	5.01908	EO_DC
chr1	82800264	82800664	Peak2330	0.952934	0.019249	5.05358	3.62582	4.19213	EO_DC
chr1	82816835	82817235	Peak2331	0.714154	0.0390424	5.77918	4.87469	5.54142	EO_DC
chr1	84329332	84329732	Peak2346	1.36791	0.000111349	6.17265	4.43495	4.99704	EO_DC
chr1	84633663	84634063	Peak2349	0.951896	0.0213389	4.89874	3.43443	4.52391	EO_DC
chr1	8571934	8572334	Peak2366	1.15943	0.00011495	6.3878	5.01834	6.41333	EO_DC
chr1	88385398	88385798	Peak2401	0.714238	0.0439771	5.57446	4.65592	5.62875	EO_DC
chr1	88544080	88544480	Peak2412	0.8892	0.0308662	4.92265	3.56656	4.73411	EO_DC
chr1	89123025	89123425	Peak2428	0.604013	0.0215285	6.77756	6.09623	6.77592	EO_DC
chr1	90363199	90363599	Peak2461	0.864548	0.0328295	4.96774	3.68496	5.19288	EO_DC
chr1	91087624	91088024	Peak2478	0.788776	0.046013	5.21079	4.08588	4.58737	EO_DC
chr1	92118458	92118858	Peak2505	1.08205	0.00980855	4.99179	3.2907	4.39057	EO_DC
chr1	92390080	92390480	Peak2511	0.813739	0.049734	5.09597	3.8471	4.13872	EO_DC
chr1	9357393	9357793	Peak2541	1.19138	0.00748072	4.49695	2.2094	4.17692	EO_DC
chr1	94604354	94604754	Peak2553	1.3249	0.000797823	5.48426	3.62674	4.46338	EO_DC
chr1	95172062	95172462	Peak2578	1.0193	0.0040226	5.75275	4.43337	5.33229	EO_DC
chr1	95602043	95602443	Peak2594	1.06355	0.00603924	5.48359	3.99534	4.02843	EO_DC
chr1	96930589	96930989	Peak2610	1.48116	7.30507e-05	5.88697	3.94968	4.94803	EO_DC
chr1	98521943	98522343	Peak2620	0.873864	0.0374904	4.67255	3.28721	4.90654	EO_DC
chr1	98771208	98771608	Peak2622	0.702196	0.0352484	5.95476	5.08521	5.99197	EO_DC
chr10	101833165	101833565	Peak2639	0.848329	0.0274358	5.17362	3.99463	5.37244	EO_DC
chr10	103172659	103173059	Peak2647	1.13325	0.00343499	5.57467	3.99427	3.98602	EO_DC
chr10	104088102	104088502	Peak2649	0.773084	0.026115	5.93349	4.9495	4.91908	EO_DC
chr10	105190904	105191304	Peak2652	1.32409	6.05754e-05	6.36397	4.7424	4.87329	EO_DC
chr10	105255325	105255725	Peak2653	0.785276	0.0334595	5.67352	4.62743	4.58737	EO_DC
chr10	105443148	105443548	Peak2657	0.991679	0.00214958	6.21106	4.9973	6.25102	EO_DC
chr10	107881449	107881849	Peak2675	0.901964	0.0333261	4.74999	3.29186	5.03771	EO_DC
chr10	109462054	109462454	Peak2690	0.965738	0.00528573	5.88764	4.65659	5.01908	EO_DC
chr10	10949300	10949700	Peak2691	0.823807	0.0337826	5.40441	4.24973	4.20317	EO_DC
chr10	111029598	111029998	Peak2733	1.17197	0.00303015	5.35254	3.68407	5.05223	EO_DC
chr10	11260374	11260774	Peak2756	1.42508	0.000572935	5.30201	3.21186	4.48616	EO_DC
chr10	112869723	112870123	Peak2758	0.837831	0.0393811	4.99023	3.74218	4.55442	EO_DC
chr10	113492673	113493073	Peak2759	0.995489	0.0115069	5.41805	3.99463	4.51184	EO_DC
chr10	11467057	11467457	Peak2764	0.844846	0.0489381	4.5306	3.12651	4.63895	EO_DC
chr10	115949635	115950035	Peak2784	0.979359	0.00772651	5.63321	4.32715	5.00107	EO_DC
chr10	117343289	117343689	Peak2828	0.822896	0.0155625	5.90943	4.87431	5.61132	EO_DC
chr10	118681178	118681578	Peak2849	0.888261	0.0081104	5.85193	4.74112	5.93815	EO_DC
chr10	120366690	120367090	Peak2896	0.848685	0.0325218	5.35205	4.1304	4.51627	EO_DC
chr10	120375328	120375728	Peak2897	0.898486	0.0105205	5.89858	4.74282	4.77709	EO_DC
chr10	124601764	124602164	Peak2973	1.0518	0.0105179	5.03116	3.43232	4.5501	EO_DC
chr10	124651811	124652211	Peak2976	1.07321	0.0096667	4.9436	3.28896	4.50739	EO_DC
chr10	126711671	126712071	Peak3027	0.722094	0.022821	6.08454	5.2114	5.93694	EO_DC
chr10	127577437	127577837	Peak3075	0.882008	0.0068769	6.10487	5.01939	5.44149	EO_DC
chr10	12780730	12781130	Peak3092	1.05642	0.00619082	5.60189	4.13008	4.16567	EO_DC
chr10	12827752	12828152	Peak3127	0.779865	0.0139604	6.09423	5.1496	6.10124	EO_DC
chr10	128337688	128338088	Peak3131	0.958252	0.00182528	6.27555	5.12862	5.98239	EO_DC
chr10	128986442	128986842	Peak3139	0.849993	0.0198077	5.75128	4.62812	5.07783	EO_DC
chr10	129442280	129442680	Peak3143	0.682524	0.0309615	6.05433	5.23107	6.17438	EO_DC
chr10	129849575	129849975	Peak3148	0.690171	0.0492759	5.85313	4.97323	5.31016	EO_DC
chr10	14180030	14180430	Peak3165	0.864348	0.0433209	4.46743	3.04201	4.88705	EO_DC
chr10	14303206	14303606	Peak3167	1.2536	0.000382442	5.96758	4.3649	5.34164	EO_DC
chr10	14479644	14480044	Peak3169	1.06266	0.00565693	5.76347	4.29099	4.21413	EO_DC
chr10	14643113	14643513	Peak3170	0.787009	0.0365538	5.50046	4.43337	4.67798	EO_DC
chr10	14706360	14706760	Peak3172	1.21441	0.000585556	5.95668	4.39981	5.18176	EO_DC
chr10	15305885	15306285	Peak3175	1.1225	0.00221867	5.73898	4.25003	4.57041	EO_DC
chr10	18627218	18627618	Peak3225	1.2271	0.00328705	5.01115	3.1304	4.66206	EO_DC
chr10	20810826	20811226	Peak3269	1.00947	0.00329751	6.02088	4.74155	4.72264	EO_DC
chr10	21496378	21496778	Peak3282	1.01746	0.0104652	5.37123	3.90025	4.5426	EO_DC
chr10	21700537	21700937	Peak3292	0.791256	0.0481578	5.09452	3.94637	4.95784	EO_DC
chr10	21708327	21708727	Peak3293	1.22472	0.000859583	5.8282	4.21155	4.38704	EO_DC
chr10	23502905	23503305	Peak3309	0.73052	0.0312481	5.88714	4.97269	5.48164	EO_DC
chr10	23525956	23526356	Peak3312	0.724998	0.0435286	5.79097	4.85005	5.22428	EO_DC
chr10	25352089	25352489	Peak3351	1.00738	0.00741884	5.50046	4.13008	5.09195	EO_DC
chr10	28739701	28740101	Peak3383	0.604719	0.0472267	6.31085	5.59673	6.38219	EO_DC
chr10	33847274	33847674	Peak3432	0.76505	0.0239566	6.00026	5.04115	5.14369	EO_DC
chr10	36267518	36267918	Peak3458	1.0191	0.00757422	5.57675	4.1695	4.66606	EO_DC
chr10	3996709	3997109	Peak3511	1.06989	0.00286579	5.86365	4.46797	4.27013	EO_DC
chr10	41120951	41121351	Peak3538	0.970298	0.0127543	5.05597	3.68672	6.05181	EO_DC
chr10	41135226	41135626	Peak3539	0.851468	0.0383829	4.72526	3.43232	5.32472	EO_DC
chr10	41512131	41512531	Peak3558	0.802844	0.00738654	6.25777	5.30803	6.37943	EO_DC
chr10	41717396	41717796	Peak3564	1.17377	0.001344	5.54544	3.99605	5.80719	EO_DC
chr10	42366197	42366597	Peak3581	0.847217	0.0246813	5.40441	4.25092	4.82242	EO_DC
chr10	42580372	42580772	Peak3587	0.858789	0.0346273	5.22903	3.95005	3.81524	EO_DC
chr10	4572795	4573195	Peak3656	1.31403	0.000198025	6.00103	4.32715	5.04917	EO_DC
chr10	4795657	4796057	Peak3665	0.623436	0.0269788	6.85669	6.13899	6.04345	EO_DC
chr10	52063118	52063518	Peak3691	0.9029	0.0240919	5.11428	3.796	4.46797	EO_DC
chr10	56121175	56121575	Peak3721	0.968074	0.0140488	5.28442	3.89873	4.27013	EO_DC
chr10	59021389	59021789	Peak3764	1.06154	0.00201653	5.91042	4.5644	5.38219	EO_DC
chr10	61087568	61087968	Peak3871	0.819407	0.0365821	5.37147	4.21032	4.29099	EO_DC
chr10	61282840	61283240	Peak3879	0.868006	0.018445	5.65838	4.50125	5.31085	EO_DC
chr10	64199347	64199747	Peak3954	2.33108	2.6785e-08	6.26637	3.2907	3.4002	EO_DC
chr10	64206921	64207321	Peak3955	0.982125	0.000221353	7.01594	5.90025	6.34413	EO_DC
chr10	67692884	67693284	Peak4010	1.22323	0.00456811	4.64565	2.62444	5.0222	EO_DC
chr10	67694175	67694575	Peak4011	2.01574	2.58178e-07	6.19151	3.62766	4.79811	EO_DC
chr10	69322797	69323197	Peak4032	0.92174	0.0138965	5.50002	4.25092	5.14213	EO_DC
chr10	69619179	69619579	Peak4045	1.09905	0.00807486	5.19097	3.49824	4.24897	EO_DC
chr10	69754771	69755171	Peak4050	1.36456	0.000181103	6.13405	4.36435	3.57352	EO_DC
chr10	7393354	7393754	Peak4100	0.800461	0.0368314	5.57259	4.46797	3.9924	EO_DC
chr10	74899611	74900011	Peak4115	0.819977	0.0481167	4.94392	3.6854	4.23828	EO_DC
chr10	75465236	75465636	Peak4149	0.89793	0.0260384	5.17554	3.84946	4.77439	EO_DC
chr10	78662712	78663112	Peak4249	0.909115	0.0248833	5.09394	3.74346	4.58315	EO_DC
chr10	81610318	81610718	Peak4441	0.876804	0.0267694	5.38993	4.12911	4.13296	EO_DC
chr10	83226630	83227030	Peak4484	0.924415	0.0325941	4.43912	2.84631	4.86382	EO_DC
chr10	83913022	83913422	Peak4494	0.860715	0.0392896	5.19178	3.84591	3.45417	EO_DC
chr10	87148786	87149186	Peak4580	1.25033	0.000273629	6.10458	4.53231	4.92243	EO_DC
chr10	88147663	88148063	Peak4599	0.767154	0.0191019	6.13532	5.19239	5.6267	EO_DC
chr10	89286709	89287109	Peak4620	1.08549	0.00553725	5.43477	3.90025	4.603	EO_DC
chr10	89927706	89928106	Peak4624	1.23455	0.0024466	5.32186	3.50025	3.92243	EO_DC
chr10	90663265	90663665	Peak4642	0.817222	0.0353583	5.23114	4.08588	5.18733	EO_DC
chr10	90760520	90760920	Peak4645	1.15192	0.00452712	5.26611	3.56464	4.25041	EO_DC
chr10	90888366	90888766	Peak4646	1.34052	7.29026e-06	6.69905	5.12959	6.00107	EO_DC
chr10	92827146	92827546	Peak4664	0.65857	0.0399046	6.10631	5.30803	6.24897	EO_DC
chr10	9295402	9295802	Peak4671	1.01068	0.0129557	5.00991	3.50025	4.74824	EO_DC
chr10	93257891	93258291	Peak4682	0.796147	0.0403899	5.51344	4.40035	3.9291	EO_DC
chr10	95346332	95346732	Peak4760	1.44794	2.9346e-05	6.13306	4.3263	6.02998	EO_DC
chr10	97552915	97553315	Peak4780	1.10206	0.00295522	5.80141	4.32715	4.60604	EO_DC
chr11	100136022	100136422	Peak4819	1.54558	1.16652e-05	6.10386	4.17044	5.47254	EO_DC
chr11	100139061	100139461	Peak4820	0.792263	0.0345122	5.32037	4.25003	5.43042	EO_DC
chr11	102306688	102307088	Peak4962	0.825444	0.0306444	5.26508	4.12911	5.53547	EO_DC
chr11	103153649	103154049	Peak5011	0.907329	0.0294408	4.77973	3.3638	4.69267	EO_DC
chr11	103249115	103249515	Peak5021	0.855309	0.0316741	4.92396	3.68628	5.57467	EO_DC
chr11	103754239	103754639	Peak5036	1.1327	0.0029136	5.49914	3.94895	4.82599	EO_DC
chr11	104150432	104150832	Peak5053	1.34775	3.05196e-08	7.47204	5.98316	6.99595	EO_DC
chr11	104156975	104157375	Peak5054	0.719201	0.0402853	5.60454	4.68562	5.92076	EO_DC
chr11	104509869	104510269	Peak5067	0.776375	0.028645	5.65857	4.65592	5.38153	EO_DC
chr11	106530536	106530936	Peak5112	0.829007	0.0153054	5.81619	4.76934	5.54951	EO_DC
chr11	107400235	107400635	Peak5146	0.788598	0.0290379	5.65896	4.62628	4.80538	EO_DC
chr11	108929876	108930276	Peak5168	1.02871	0.0142524	4.98898	3.36214	3.52391	EO_DC
chr11	109214751	109215151	Peak5175	0.883574	0.0242605	5.15466	3.89797	5.11473	EO_DC
chr11	111704999	111705399	Peak5208	1.05774	0.00192953	6.18423	4.85025	4.74824	EO_DC
chr11	112672282	112672682	Peak5213	0.719416	0.0431982	5.82611	4.89854	4.90316	EO_DC
chr11	112701643	112702043	Peak5214	0.97067	0.0105363	5.54417	4.21216	4.5251	EO_DC
chr11	113260943	113261343	Peak5224	1.0072	0.00956673	5.26662	3.84907	4.89296	EO_DC
chr11	113270544	113270944	Peak5225	1.10566	0.0114728	4.69895	2.73793	4.25041	EO_DC
chr11	113438550	113438950	Peak5229	1.2269	0.00119332	5.657	3.99534	5.01282	EO_DC
chr11	113571523	113571923	Peak5237	0.870703	0.000220985	7.34203	6.38076	6.37943	EO_DC
chr11	115781565	115781965	Peak5353	0.942424	0.0168482	5.24938	3.90025	4.61546	EO_DC
chr11	115817743	115818143	Peak5356	0.957889	0.0111237	5.30251	3.99463	5.74017	EO_DC
chr11	116288189	116288589	Peak5390	1.13832	0.000714096	6.29413	4.87256	4.75201	EO_DC
chr11	116950027	116950427	Peak5437	1.42922	1.32654e-05	6.26791	4.53256	6.02914	EO_DC
chr11	11729005	11729405	Peak5466	0.738099	0.035871	5.63081	4.6854	5.70967	EO_DC
chr11	11779640	11780040	Peak5502	0.92139	0.0139676	5.50024	4.25122	4.72264	EO_DC
chr11	118002073	118002473	Peak5515	0.740005	0.0445187	5.54502	4.56368	5.19415	EO_DC
chr11	11848973	11849373	Peak5532	0.728306	0.0421932	5.71349	4.76809	5.21885	EO_DC
chr11	120044315	120044715	Peak5597	1.35513	0.000203832	5.9317	4.17171	5.34844	EO_DC
chr11	120524970	120525370	Peak5634	0.960514	0.00283762	6.02286	4.84828	6.86144	EO_DC
chr11	120712737	120713137	Peak5649	0.997939	0.00693219	5.69895	4.36297	4.68194	EO_DC
chr11	12273331	12273731	Peak5683	0.654026	0.0336669	6.50674	5.72884	5.91528	EO_DC
chr11	12367213	12367613	Peak5687	0.862204	0.00352081	6.39624	5.38165	6.26882	EO_DC
chr11	12416448	12416848	Peak5688	1.08798	0.00719276	5.17389	3.56416	4.31526	EO_DC
chr11	13878573	13878973	Peak5699	0.950168	0.0248956	4.82907	3.29186	4.68588	EO_DC
chr11	14059340	14059740	Peak5702	1.00979	0.00313837	5.99007	4.71385	5.09572	EO_DC
chr11	16507929	16508329	Peak5715	1.09351	0.000559568	6.24834	4.92499	6.00696	EO_DC
chr11	16575946	16576346	Peak5716	1.18044	0.000787541	5.97981	4.46823	4.89637	EO_DC
chr11	17783218	17783618	Peak5728	0.769419	0.0484355	5.0739	3.99641	5.46629	EO_DC
chr11	19885412	19885812	Peak5759	0.973623	0.00358363	5.89941	4.68473	5.84455	EO_DC
chr11	21069325	21069725	Peak5800	1.19691	0.00025118	5.96789	4.5005	6.54577	EO_DC
chr11	21158599	21158999	Peak5802	1.5705	0.000271008	5.33655	2.94637	4.63598	EO_DC
chr11	22361240	22361640	Peak5813	1.16363	0.00280024	5.3698	3.74133	5.22823	EO_DC
chr11	23701956	23702356	Peak5852	0.801775	0.0359982	5.35496	4.25033	4.66206	EO_DC
chr11	24642957	24643357	Peak5866	0.943267	0.0254058	4.72451	3.21247	4.603	EO_DC
chr11	26067312	26067712	Peak5877	1.20496	0.000201238	6.23898	4.76997	6.12967	EO_DC
chr11	27975497	27975897	Peak5889	1.44488	0.000222627	5.82733	3.85064	3.67005	EO_DC
chr11	28947944	28948344	Peak5899	1.19295	0.00041441	6.05433	4.56488	5.37488	EO_DC
chr11	28969687	28970087	Peak5900	0.881431	0.00605692	6.4037	5.32856	5.79081	EO_DC
chr11	29614068	29614468	Peak5912	0.966414	0.00190819	6.24925	5.08605	5.86509	EO_DC
chr11	30082904	30083304	Peak5920	0.832694	0.0326105	5.301	4.12943	4.63079	EO_DC
chr11	30344368	30344768	Peak5926	0.863457	0.0187608	5.61582	4.4672	5.16001	EO_DC
chr11	33437425	33437825	Peak6017	1.42799	2.12186e-07	6.96678	5.34489	6.41452	EO_DC
chr11	33451011	33451411	Peak6019	0.87739	0.0160981	5.37147	4.21094	5.86335	EO_DC
chr11	37934629	37935029	Peak6092	1.01442	0.0109088	5.32186	3.84986	4.14291	EO_DC
chr11	4590399	4590799	Peak6196	1.26898	0.000117922	6.18232	4.62628	5.86856	EO_DC
chr11	46363279	46363679	Peak6211	1.19336	0.00469337	4.92069	3.03925	4.95042	EO_DC
chr11	48510692	48511092	Peak6230	1.09268	0.00425051	5.40464	3.89949	4.98516	EO_DC
chr11	49953031	49953431	Peak6283	1.24615	0.000433602	5.88731	4.28896	5.25501	EO_DC
chr11	53124888	53125288	Peak6382	0.813249	0.039787	5.2486	4.08387	4.70049	EO_DC
chr11	53149397	53149797	Peak6385	0.883107	0.0152081	5.69914	4.53354	4.90224	EO_DC
chr11	53886821	53887221	Peak6415	1.29277	0.000726206	5.8007	4.04235	4.58737	EO_DC
chr11	5395904	5396304	Peak6420	0.76008	0.0497493	5.41897	4.36214	4.67402	EO_DC
chr11	55137350	55137750	Peak6457	1.00657	0.013705	4.87679	3.36325	5.17616	EO_DC
chr11	57842359	57842759	Peak6513	0.806411	0.0338074	5.4672	4.3638	4.89388	EO_DC
chr11	60553768	60554168	Peak6623	0.918035	0.0105704	5.8863	4.68584	4.97405	EO_DC
chr11	65308427	65308827	Peak6759	1.17359	0.00446831	4.98898	3.21186	4.83925	EO_DC
chr11	67159338	67159738	Peak6790	0.843068	0.00374096	6.56648	5.5803	5.93649	EO_DC
chr11	68099955	68100355	Peak6804	0.716154	0.0468463	5.64506	4.71364	5.30061	EO_DC
chr11	69598450	69598850	Peak6887	0.77479	0.0298173	5.82646	4.82198	5.20866	EO_DC
chr11	71411261	71411661	Peak6954	0.886388	0.0236131	5.05448	3.79641	5.39604	EO_DC
chr11	72100664	72101064	Peak6968	1.71048	1.66077e-05	5.97871	3.68716	3.67798	EO_DC
chr11	72234009	72234409	Peak6977	1.03822	0.00217967	5.99038	4.6854	5.48842	EO_DC
chr11	73132004	73132404	Peak7009	1.86754	1.95335e-07	6.37835	4.08755	5.63488	EO_DC
chr11	7589741	7590141	Peak7080	1.04098	0.00965288	5.09452	3.5656	5.01367	EO_DC
chr11	78952131	78952531	Peak7203	0.962885	0.0084656	5.60536	4.3263	5.35835	EO_DC
chr11	83308946	83309346	Peak7296	0.825019	0.0310558	5.26714	4.12846	5.03996	EO_DC
chr11	84660455	84660855	Peak7331	0.850743	0.0396869	4.98867	3.68407	3.95369	EO_DC
chr11	85579760	85580160	Peak7357	1.03398	0.00315453	5.8289	4.50276	6.05293	EO_DC
chr11	8623152	8623552	Peak7376	0.662268	0.0292541	6.48448	5.70057	5.70721	EO_DC
chr11	88766755	88767155	Peak7487	1.30082	0.000486069	5.81408	4.08688	4.88705	EO_DC
chr11	88929278	88929678	Peak7501	0.976482	0.00302442	5.97714	4.77039	6.31966	EO_DC
chr11	94968067	94968467	Peak7587	0.696609	0.0402823	5.97824	5.1065	5.13217	EO_DC
chr11	97496894	97497294	Peak7746	1.2627	0.000201462	6.04272	4.46746	5.63433	EO_DC
chr11	97532400	97532800	Peak7749	0.664368	0.0119226	6.86973	6.11785	6.29347	EO_DC
chr11	98956281	98956681	Peak7842	0.86874	0.0369184	4.85107	3.50175	4.29476	EO_DC
chr11	9987972	9988372	Peak7854	0.919529	0.0163439	5.48448	4.21124	4.65914	EO_DC
chr12	102347950	102348350	Peak7924	1.11118	0.00506663	5.33605	3.74133	4.6102	EO_DC
chr12	103175774	103176174	Peak7933	0.920115	0.0122537	5.58865	4.36325	4.77339	EO_DC
chr12	103743361	103743761	Peak7947	1.10197	0.00297033	5.6862	4.21063	4.61546	EO_DC
chr12	103757628	103758028	Peak7948	1.22758	0.00365049	5.05299	3.12716	4.086	EO_DC
chr12	103834710	103835110	Peak7952	1.57281	2.5537e-05	5.88848	3.84907	5.14863	EO_DC
chr12	103878970	103879370	Peak7954	0.773194	0.00803918	6.48525	5.57971	6.35835	EO_DC
chr12	103919782	103920182	Peak7955	0.856019	0.00789785	6.15397	5.10733	5.6293	EO_DC
chr12	103945130	103945530	Peak7957	0.948732	0.0023814	6.35533	5.21201	6.02107	EO_DC
chr12	104802987	104803387	Peak7979	1.41005	0.000417395	5.72601	3.7443	3.78078	EO_DC
chr12	105485753	105486153	Peak7983	0.729373	0.0311707	6.06215	5.15072	5.38638	EO_DC
chr12	105665102	105665502	Peak7987	0.740881	0.0333608	5.7399	4.79662	5.37488	EO_DC
chr12	105691293	105691693	Peak7991	1.25988	0.000253847	6.05329	4.46848	5.27467	EO_DC
chr12	106314786	106315186	Peak8016	1.19875	0.00153275	5.57425	3.946	5.85906	EO_DC
chr12	106460952	106461352	Peak8019	0.828188	0.0144349	6.01099	4.97106	5.08978	EO_DC
chr12	106784182	106784582	Peak8030	0.783277	0.0361634	5.45357	4.39793	4.99473	EO_DC
chr12	107263703	107264103	Peak8052	0.920931	0.00687766	5.87645	4.71407	5.45248	EO_DC
chr12	111926237	111926637	Peak8162	1.02876	0.000973636	6.30138	5.06343	6.34322	EO_DC
chr12	112075440	112075840	Peak8171	0.866714	0.00373109	6.47564	5.45155	6.22318	EO_DC
chr12	114954743	114955143	Peak8296	0.979689	0.00411747	5.86365	4.62628	5.49457	EO_DC
chr12	116840124	116840524	Peak8307	0.769182	0.0240937	5.79025	4.82198	5.80126	EO_DC
chr12	118286053	118286453	Peak8329	1.25183	8.3507e-07	7.32326	5.92443	6.41571	EO_DC
chr12	119437137	119437537	Peak8350	0.747097	0.00533254	7.03154	6.18169	5.90608	EO_DC
chr12	119585156	119585556	Peak8352	0.852066	0.012707	6.16279	5.08739	5.19692	EO_DC
chr12	121184362	121184762	Peak8372	0.755645	0.0221845	6.08293	5.14976	5.49007	EO_DC
chr12	12795256	12795656	Peak8384	0.737623	0.0137936	6.37123	5.5	6.10526	EO_DC
chr12	17842052	17842452	Peak8445	0.76048	0.0483521	5.30276	4.25211	4.96995	EO_DC
chr12	21140044	21140444	Peak8478	0.775995	0.0434066	5.57217	4.50226	4.64301	EO_DC
chr12	37806655	37807055	Peak8650	0.990817	0.0104891	5.33753	3.94931	4.74447	EO_DC
chr12	40467841	40468241	Peak8675	1.05854	0.00245573	6.15216	4.79662	5.45141	EO_DC
chr12	41380854	41381254	Peak8689	0.807986	0.040473	5.1926	4.04063	4.53269	EO_DC
chr12	44313046	44313446	Peak8715	1.56263	5.878e-05	5.83786	3.74261	4.99704	EO_DC
chr12	45021295	45021695	Peak8717	1.03434	0.00170707	6.02149	4.74133	5.71688	EO_DC
chr12	45636908	45637308	Peak8723	0.957288	0.0239716	4.9871	3.4339	3.30366	EO_DC
chr12	53483979	53484379	Peak8777	0.863452	0.00802674	6.12547	5.0636	5.21066	EO_DC
chr12	58200013	58200413	Peak8856	1.33936	0.000398172	5.64426	3.84828	5.12348	EO_DC
chr12	60425142	60425542	Peak8881	1.12533	0.00187285	5.90943	4.43416	4.28959	EO_DC
chr12	63808155	63808555	Peak8887	0.841086	0.00315491	6.74625	5.76924	5.64191	EO_DC
chr12	66216135	66216535	Peak8896	2.07143	1.20864e-08	6.41171	3.89797	5.70967	EO_DC
chr12	66502904	66503304	Peak8901	1.03917	0.00370887	5.88781	4.5328	4.32034	EO_DC
chr12	70311325	70311725	Peak8913	0.861524	0.0123778	6.04091	4.94729	5.44552	EO_DC
chr12	70929140	70929540	Peak8937	0.870068	0.00757989	6.13334	5.06343	5.88705	EO_DC
chr12	71884794	71885194	Peak8956	0.919994	0.0123201	5.85347	4.62766	4.68588	EO_DC
chr12	71913970	71914370	Peak8957	1.08536	0.00566771	5.33655	3.79682	4.61132	EO_DC
chr12	72131278	72131678	Peak8966	0.995122	0.0144963	4.99023	3.50125	4.78347	EO_DC
chr12	72731439	72731839	Peak8980	0.847072	0.0310252	5.05299	3.84867	5.38704	EO_DC
chr12	72992791	72993191	Peak8985	0.941371	0.0142483	5.43592	4.12846	4.33412	EO_DC
chr12	73112413	73112813	Peak8986	1.03128	0.00643428	5.40628	3.99534	5.31457	EO_DC
chr12	73816936	73817336	Peak9004	0.829992	0.0491287	4.53146	3.21308	5.25959	EO_DC
chr12	77648848	77649248	Peak9097	0.750032	0.014937	6.38014	5.48344	5.62053	EO_DC
chr12	78002503	78002903	Peak9111	0.809224	0.00316954	6.77665	5.84927	6.60972	EO_DC
chr12	80136386	80136786	Peak9143	1.15811	0.000207152	6.45357	5.06326	5.49396	EO_DC
chr12	81161368	81161768	Peak9173	1.29219	0.0013827	5.49804	3.62904	4.61132	EO_DC
chr12	81228106	81228506	Peak9180	0.953811	0.00655003	5.85347	4.62605	5.17616	EO_DC
chr12	81324627	81325027	Peak9190	0.871944	0.004333	6.31022	5.26992	6.4115	EO_DC
chr12	81939757	81940157	Peak9217	1.01986	0.00665764	5.51452	4.12846	4.78078	EO_DC
chr12	81986267	81986667	Peak9218	1.12586	0.0014934	5.9546	4.501	5.18454	EO_DC
chr12	83266864	83267264	Peak9247	0.970352	0.00165667	6.41392	5.25003	5.75013	EO_DC
chr12	84919809	84920209	Peak9263	0.861148	0.00729596	6.22127	5.16981	5.58526	EO_DC
chr12	84965207	84965607	Peak9265	0.984032	0.00756527	5.48492	4.17013	5.35341	EO_DC
chr12	87094282	87094682	Peak9349	1.48491	0.000172424	5.72732	3.6854	3.59883	EO_DC
chr12	87290535	87290935	Peak9352	0.931289	0.0194045	5.09278	3.74218	5.11473	EO_DC
chr12	87743722	87744122	Peak9362	0.706581	0.040261	5.93268	5.04115	5.1285	EO_DC
chr12	87845272	87845672	Peak9372	1.88636	2.77498e-10	6.83347	4.68451	6.80785	EO_DC
chr12	88157679	88158079	Peak9385	0.915405	0.0151899	5.49782	4.25062	4.84983	EO_DC
chr12	88244719	88245119	Peak9395	0.796033	0.0391051	5.19097	4.08555	5.67096	EO_DC
chr12	88620725	88621125	Peak9413	0.68572	0.0330047	6.24925	5.41536	5.48842	EO_DC
chr12	88658856	88659256	Peak9416	1.42117	4.61547e-05	6.18355	4.40089	5.49845	EO_DC
chr12	88924718	88925118	Peak9425	0.905043	0.0161421	5.62961	4.39954	4.49396	EO_DC
chr12	89283705	89284105	Peak9430	0.881794	0.00229209	6.5142	5.48433	6.27013	EO_DC
chr13	102003816	102004216	Peak9525	0.848523	0.0193888	5.71462	4.59743	5.14578	EO_DC
chr13	103488995	103489395	Peak9544	1.47458	1.91028e-05	6.22969	4.39739	5.38638	EO_DC
chr13	103630075	103630475	Peak9549	0.742314	0.0390417	5.84046	4.87353	3.76596	EO_DC
chr13	103688701	103689101	Peak9552	0.747443	0.048811	5.48537	4.46874	4.66606	EO_DC
chr13	104457781	104458181	Peak9559	0.904241	0.025265	5.13574	3.79723	4.49966	EO_DC
chr13	104570373	104570773	Peak9562	0.856716	0.0363536	5.03419	3.74303	4.29476	EO_DC
chr13	105434321	105434721	Peak9580	0.892196	0.0323549	4.82698	3.43495	4.49396	EO_DC
chr13	108663476	108663876	Peak9617	1.41905	0.000203743	5.64466	3.74049	5.27728	EO_DC
chr13	11030269	11030669	Peak9642	0.887176	0.0223231	5.49804	4.25241	4.22896	EO_DC
chr13	112343292	112343692	Peak9673	0.832872	0.0168811	5.88731	4.82218	5.55913	EO_DC
chr13	112509961	112510361	Peak9677	1.09946	0.00188324	5.88664	4.46771	5.24508	EO_DC
chr13	112726431	112726831	Peak9687	1.29981	0.000809453	5.58804	3.79518	4.73411	EO_DC
chr13	112729098	112729498	Peak9688	1.23669	0.00100538	5.65896	3.99605	4.78347	EO_DC
chr13	113203018	113203418	Peak9698	0.949298	0.0120132	5.33973	4.04132	5.69214	EO_DC
chr13	114535554	114535954	Peak9739	0.836387	0.0421415	5.01053	3.74176	4.50619	EO_DC
chr13	115068936	115069336	Peak9754	1.04708	0.00488567	5.69838	4.29128	5.18658	EO_DC
chr13	115088014	115088414	Peak9755	0.931635	0.00919296	5.90007	4.68429	3.92243	EO_DC
chr13	118764106	118764506	Peak9784	1.31027	0.000696554	5.64684	3.84867	4.5195	EO_DC
chr13	118824441	118824841	Peak9786	1.12543	0.00514097	5.21026	3.56704	5.22157	EO_DC
chr13	119494566	119494966	Peak9791	1.28257	0.000502307	6.05358	4.3638	4.41581	EO_DC
chr13	12026573	12026973	Peak9800	0.782284	0.00799095	6.5902	5.67029	5.75389	EO_DC
chr13	13005345	13005745	Peak9819	1.03509	0.0014064	6.26469	4.99658	6.21576	EO_DC
chr13	13539269	13539669	Peak9826	1.35034	0.000475709	5.53082	3.68628	5.12348	EO_DC
chr13	14382306	14382706	Peak9845	0.963007	0.00727025	5.72657	4.46746	4.90991	EO_DC
chr13	14614514	14614914	Peak9847	0.604725	0.0391907	6.56606	5.86145	5.74258	EO_DC
chr13	18933758	18934158	Peak9881	1.13938	0.000805175	5.86399	4.43311	5.94638	EO_DC
chr13	21957250	21957650	Peak9946	0.973501	0.00416059	5.79025	4.56392	6.09828	EO_DC
chr13	30172661	30173061	Peak10091	1.24307	0.000151242	6.34591	4.82398	5.16773	EO_DC
chr13	32915053	32915453	Peak10115	0.982842	0.0148201	5.24756	3.79805	4.21811	EO_DC
chr13	34201561	34201961	Peak10134	0.963481	0.00197425	6.26752	5.10749	6.04038	EO_DC
chr13	38171881	38172281	Peak10202	0.800923	0.0482453	5.03085	3.84828	4.70438	EO_DC
chr13	38262624	38263024	Peak10207	0.860243	0.029736	5.13574	3.90063	4.89637	EO_DC
chr13	39919545	39919945	Peak10223	0.847182	0.0262947	5.52996	4.36408	4.20169	EO_DC
chr13	40812575	40812975	Peak10229	1.26703	0.00104422	5.37195	3.62582	5.40976	EO_DC
chr13	41833105	41833505	Peak10259	0.815309	0.0303491	5.19287	4.08622	5.74447	EO_DC
chr13	44659955	44660355	Peak10309	1.02657	0.00677078	5.61723	4.21002	4.13139	EO_DC
chr13	45047975	45048375	Peak10329	0.912711	0.0201709	5.24938	3.94747	4.61546	EO_DC
chr13	47219814	47220214	Peak10369	0.798417	0.0483521	5.07361	3.89949	4.27537	EO_DC
chr13	51190572	51190972	Peak10436	0.984198	0.0134805	5.05358	3.6272	5.24897	EO_DC
chr13	5184821	5185221	Peak10454	0.876621	0.0151996	5.77683	4.62697	4.47709	EO_DC
chr13	53556708	53557108	Peak10494	1.0801	0.000696554	6.21079	4.89968	5.94967	EO_DC
chr13	53907238	53907638	Peak10499	0.855307	0.0404978	4.89974	3.5632	4.06962	EO_DC
chr13	55769685	55770085	Peak10578	0.830062	0.0400903	5.17362	3.94931	4.11978	EO_DC
chr13	5583262	5583662	Peak10582	0.957634	0.00822088	5.58824	4.32715	5.57099	EO_DC
chr13	62179693	62180093	Peak10711	0.946972	0.00382987	6.16376	4.99658	6.17654	EO_DC
chr13	62612002	62612402	Peak10724	1.45141	2.67641e-05	5.97887	4.17076	6.02801	EO_DC
chr13	63173759	63174159	Peak10738	1.16737	0.00444813	5.11599	3.36325	4.33914	EO_DC
chr13	63598120	63598520	Peak10752	0.85827	0.03569	5.03176	3.74261	4.32034	EO_DC
chr13	65360809	65361209	Peak10784	0.810427	0.0246694	5.8023	4.74112	4.6237	EO_DC
chr13	67516673	67517073	Peak10822	1.09355	0.00160012	5.98757	4.59579	5.26223	EO_DC
chr13	6921613	6922013	Peak10848	0.854714	0.0233487	5.45221	4.28867	5.03462	EO_DC
chr13	73084873	73085273	Peak10876	1.4083	0.000496546	5.57342	3.56512	3.25429	EO_DC
chr13	73919958	73920358	Peak10898	0.631666	0.0430272	6.15341	5.39874	6.24302	EO_DC
chr13	76666904	76667304	Peak10951	1.34116	0.000115166	5.97871	4.2907	5.86636	EO_DC
chr13	84505755	84506155	Peak11018	1.11811	0.00538966	5.13376	3.50075	4.90654	EO_DC
chr13	86062330	86062730	Peak11033	0.885662	0.0191481	5.49914	4.28954	4.73791	EO_DC
chr13	87453309	87453709	Peak11043	0.849561	0.0449795	4.80177	3.436	4.28959	EO_DC
chr13	88869204	88869604	Peak11048	1.35442	0.000644538	5.33728	3.43232	5.26223	EO_DC
chr13	89069117	89069517	Peak11050	0.873126	0.0303938	5.2829	3.99676	4.12717	EO_DC
chr13	91008794	91009194	Peak11068	0.735428	0.0173082	6.44432	5.56512	5.06578	EO_DC
chr13	91026161	91026561	Peak11069	0.857555	0.0258279	5.4037	4.21216	4.89729	EO_DC
chr13	92942612	92943012	Peak11085	0.930472	0.00145876	6.55876	5.46758	5.99747	EO_DC
chr13	94995117	94995517	Peak11116	0.731976	0.0379223	5.86331	4.92424	4.67798	EO_DC
chr13	95135307	95135707	Peak11120	1.43766	5.40335e-05	5.91141	4.08555	5.66606	EO_DC
chr13	95628095	95628495	Peak11130	0.901971	0.00560964	6.10544	4.99623	5.5201	EO_DC
chr13	96427150	96427550	Peak11164	0.83635	0.0137546	5.90024	4.84808	5.44149	EO_DC
chr13	99747315	99747715	Peak11251	1.05406	0.00412927	5.76676	4.36518	5.27537	EO_DC
chr14	100177759	100178159	Peak11260	0.837546	0.0419701	4.89941	3.62812	4.69267	EO_DC
chr14	101778608	101779008	Peak11280	0.872542	0.0196292	5.77611	4.5979	4.83667	EO_DC
chr14	102348262	102348662	Peak11292	0.811293	0.0341392	5.48293	4.36352	4.09195	EO_DC
chr14	105407589	105407989	Peak11322	1.01843	0.00951977	5.19314	3.74218	4.91908	EO_DC
chr14	105597665	105598065	Peak11325	1.27038	0.000723126	5.69933	3.99569	4.8673	EO_DC
chr14	107847439	107847839	Peak11344	1.26671	5.42872e-05	6.55971	5.04184	4.83667	EO_DC
chr14	108248987	108249387	Peak11345	0.988402	0.0155931	4.85279	3.36325	5.17616	EO_DC
chr14	113772357	113772757	Peak11357	0.880403	0.0154461	5.72751	4.56584	4.75576	EO_DC
chr14	118252043	118252443	Peak11374	0.970954	0.0197971	4.72638	3.20879	5.21811	EO_DC
chr14	11872035	11872435	Peak11387	1.13096	0.00322185	5.55761	3.99641	4.93573	EO_DC
chr14	121728599	121728999	Peak11451	0.957729	0.0141172	5.30301	3.94895	4.53269	EO_DC
chr14	121905572	121905972	Peak11456	0.697072	0.00421014	6.9343	6.16046	7.34691	EO_DC
chr14	121946863	121947263	Peak11457	1.28077	0.000839301	5.5448	3.79559	4.85334	EO_DC
chr14	122203661	122204061	Peak11464	0.932237	0.0136128	5.48448	4.21094	4.70438	EO_DC
chr14	122330806	122331206	Peak11468	0.773992	0.0330047	5.67294	4.65637	4.61847	EO_DC
chr14	122679951	122680351	Peak11481	0.754287	0.0176302	6.18436	5.26992	5.78262	EO_DC
chr14	16870375	16870775	Peak11572	0.920988	0.0140883	5.50089	4.25092	4.80538	EO_DC
chr14	20029594	20029994	Peak11601	1.55816	4.31835e-05	5.8509	3.79641	4.80538	EO_DC
chr14	22293762	22294162	Peak11656	0.82702	0.0135747	5.95556	4.92443	5.61132	EO_DC
chr14	22305337	22305737	Peak11658	1.24996	0.00124499	5.35399	3.62536	5.76324	EO_DC
chr14	22429379	22429779	Peak11664	0.785547	0.0354696	5.55845	4.50251	5.31271	EO_DC
chr14	27269574	27269974	Peak11737	0.851843	0.00796539	6.23101	5.19146	5.47543	EO_DC
chr14	27807641	27808041	Peak11749	0.643445	0.047071	6.1632	5.38083	5.70243	EO_DC
chr14	28483138	28483538	Peak11774	0.725457	0.0348901	5.97997	5.06394	5.925	EO_DC
chr14	32731678	32732078	Peak11830	0.98473	0.00587701	5.75017	4.46694	5.60868	EO_DC
chr14	35129561	35129961	Peak11881	0.758741	0.0435292	5.38732	4.36297	5.15357	EO_DC
chr14	35705377	35705777	Peak11908	1.2638	0.000211041	6.40359	4.82358	4.90745	EO_DC
chr14	38207053	38207453	Peak11927	0.971282	0.0143962	5.301	3.89949	4.13716	EO_DC
chr14	38998773	38999173	Peak11931	0.896399	0.0275537	4.96583	3.62536	4.80175	EO_DC
chr14	39103252	39103652	Peak11932	1.19218	0.0041168	5.03146	3.2094	5.25307	EO_DC
chr14	39134077	39134477	Peak11933	1.04693	0.013645	4.64327	2.94858	5.0222	EO_DC
chr14	41678165	41678565	Peak11941	0.872232	0.0113652	5.67216	4.56416	6.0968	EO_DC
chr14	41705557	41705957	Peak11942	1.7308	5.89352e-07	6.36143	4.25182	5.74258	EO_DC
chr14	42333979	42334379	Peak11954	0.899746	0.0352484	4.61582	3.12846	4.31016	EO_DC
chr14	44040333	44040733	Peak11959	0.626217	0.0278566	6.60978	5.88609	6.23668	EO_DC
chr14	46065087	46065487	Peak11979	0.828716	0.000128818	7.38379	6.48401	7.6602	EO_DC
chr14	47987212	47987612	Peak12017	0.793606	0.0230263	5.86314	4.84867	5.20592	EO_DC
chr14	48192344	48192744	Peak12027	0.777541	0.0224026	6.04181	5.06445	5.71969	EO_DC
chr14	53659312	53659712	Peak12112	1.4056	0.000151351	5.78989	3.94895	5.49293	EO_DC
chr14	56734577	56734977	Peak12224	0.697437	0.0473183	5.78971	4.89911	4.97318	EO_DC
chr14	59985486	59985886	Peak12276	0.866078	0.029172	4.9921	3.74133	5.57467	EO_DC
chr14	59989303	59989703	Peak12277	0.792054	0.0124568	6.21039	5.25197	6.56779	EO_DC
chr14	60547883	60548283	Peak12284	0.830423	0.0482232	4.67216	3.36214	4.78347	EO_DC
chr14	61383399	61383799	Peak12302	0.993659	0.0139038	5.2674	3.79927	4.88705	EO_DC
chr14	64127534	64127934	Peak12361	0.844995	0.0107854	5.92265	4.87411	5.7641	EO_DC
chr14	64256130	64256530	Peak12365	1.78122	3.18266e-05	5.40675	2.8471	5.48164	EO_DC
chr14	65199212	65199612	Peak12384	1.03876	0.0114737	5.01145	3.43443	4.55872	EO_DC
chr14	68378674	68379074	Peak12451	1.14035	0.00041441	6.26688	4.87566	5.83086	EO_DC
chr14	78617133	78617533	Peak12622	1.02047	0.0142043	4.87578	3.29012	4.99876	EO_DC
chr14	78882419	78882819	Peak12625	0.758088	0.028506	5.91091	4.94876	4.70721	EO_DC
chr14	79027578	79027978	Peak12629	1.13706	0.000814843	6.05314	4.62628	5.03379	EO_DC
chr14	79540241	79540641	Peak12648	0.909878	0.00422832	6.12405	5.01869	5.97918	EO_DC
chr14	79962522	79962922	Peak12657	0.96305	0.00659548	5.87409	4.62697	4.92243	EO_DC
chr14	84557184	84557584	Peak12669	0.800151	0.0471772	4.96869	3.79641	4.87329	EO_DC
chr14	84647811	84648211	Peak12671	1.1366	0.00285346	5.64347	4.08722	5.1256	EO_DC
chr14	8560861	8561261	Peak12674	0.903314	0.0159738	5.51366	4.28983	4.80175	EO_DC
chr14	8641863	8642263	Peak12679	1.14332	0.00483211	5.05358	3.3638	4.95131	EO_DC
chr14	87522938	87523338	Peak12693	0.99361	0.00677201	5.6862	4.36463	4.95696	EO_DC
chr14	8785320	8785720	Peak12701	0.708508	0.0255521	6.18314	5.32686	5.49457	EO_DC
chr14	87855432	87855832	Peak12702	1.07838	0.00989297	4.89941	3.21063	4.76868	EO_DC
chr14	8793222	8793622	Peak12705	0.890763	0.00986895	5.87476	4.74155	5.19213	EO_DC
chr14	8956162	8956562	Peak12715	1.00873	0.0131699	5.07214	3.5656	4.83667	EO_DC
chr14	89724903	89725303	Peak12717	0.794733	0.00990123	6.46776	5.51712	5.18176	EO_DC
chr14	93342817	93343217	Peak12737	1.08198	0.00631884	5.4547	3.90063	4.086	EO_DC
chr14	95196033	95196433	Peak12744	0.695088	0.0226254	6.27619	5.45052	5.98676	EO_DC
chr14	99438468	99438868	Peak12756	0.656032	0.0258566	6.37859	5.61147	6.53627	EO_DC
chr14	99739191	99739591	Peak12769	0.935351	0.0050253	6.11313	4.94858	5.42336	EO_DC
chr14	99936523	99936923	Peak12774	0.826675	0.038041	5.09452	3.89835	4.68482	EO_DC
chr15	100304490	100304890	Peak12790	0.727973	0.0337294	5.76676	4.84887	5.92532	EO_DC
chr15	100669202	100669602	Peak12807	0.937527	0.00619405	5.957	4.77039	5.34595	EO_DC
chr15	102615529	102615929	Peak12908	0.786288	0.0448381	5.43798	4.32856	4.14863	EO_DC
chr15	103352861	103353261	Peak12946	0.945775	0.00464578	6.2206	5.04063	5.58372	EO_DC
chr15	10426448	10426848	Peak12951	1.79716	1.99091e-06	6.03252	3.74091	5.14004	EO_DC
chr15	10591688	10592088	Peak12955	0.945272	0.0116545	5.45176	4.17044	5.0575	EO_DC
chr15	10598287	10598687	Peak12956	0.909679	0.01138	5.58968	4.39874	5.48102	EO_DC
chr15	12353937	12354337	Peak12987	0.653392	0.0456974	6.00961	5.2117	6.20618	EO_DC
chr15	12437339	12437739	Peak12992	1.02795	0.0120687	5.05478	3.50326	4.86636	EO_DC
chr15	12586031	12586431	Peak12996	1.34834	0.00143692	5.02934	2.95005	5.35093	EO_DC
chr15	12648004	12648404	Peak13000	1.48836	0.000513074	5.22876	2.95005	4.39539	EO_DC
chr15	12935688	12936088	Peak13013	0.954885	0.0163675	5.23088	3.8471	4.61546	EO_DC
chr15	15021530	15021930	Peak13022	0.871456	0.0359675	4.85004	3.50125	4.50293	EO_DC
chr15	15547677	15548077	Peak13024	1.09437	0.00280021	5.73898	4.28954	4.47709	EO_DC
chr15	16559477	16559877	Peak13027	0.79911	0.0410739	5.2132	4.08521	5.10163	EO_DC
chr15	16978906	16979306	Peak13030	1.34119	0.00129647	5.23114	3.21186	4.086	EO_DC
chr15	21296160	21296560	Peak13034	1.30701	0.000906774	5.57238	3.74346	4.74824	EO_DC
chr15	22691042	22691442	Peak13037	0.789413	0.0168693	6.08308	5.10716	5.54793	EO_DC
chr15	25235560	25235960	Peak13042	1.095	0.00447104	5.4206	3.89987	4.73308	EO_DC
chr15	31284962	31285362	Peak13118	1.03007	0.0200273	4.22558	2.2094	4.79081	EO_DC
chr15	31342595	31342995	Peak13122	0.797625	0.0435104	5.13292	3.99605	5.30061	EO_DC
chr15	34497733	34498133	Peak13155	1.04674	0.00112719	6.07405	4.79702	6.21984	EO_DC
chr15	38242827	38243227	Peak13242	1.2075	0.00124848	5.46922	3.84828	5.69854	EO_DC
chr15	38336240	38336640	Peak13246	1.03779	0.00361658	5.81689	4.46746	4.92243	EO_DC
chr15	39491211	39491611	Peak13269	0.769146	0.029521	5.83838	4.84808	5.00337	EO_DC
chr15	41780508	41780908	Peak13294	1.00445	0.00645263	5.7412	4.39874	4.49068	EO_DC
chr15	4263586	4263986	Peak13296	1.09432	0.00781477	5.0951	3.436	4.53269	EO_DC
chr15	50647977	50648377	Peak13322	0.759054	0.0491994	5.30176	4.25092	4.75201	EO_DC
chr15	50795189	50795589	Peak13327	1.08789	0.00452472	5.54502	4.04201	4.31897	EO_DC
chr15	5102060	5102460	Peak13330	0.781696	0.0404976	5.43592	4.36352	4.55442	EO_DC
chr15	51128382	51128782	Peak13331	1.15004	0.00570452	5.13489	3.36435	3.47254	EO_DC
chr15	51844650	51845050	Peak13341	0.9809	0.000242726	6.66587	5.54966	7.12493	EO_DC
chr15	53757044	53757444	Peak13362	0.712837	0.031402	5.96599	5.08655	6.19628	EO_DC
chr15	53815443	53815843	Peak13363	0.811169	0.0183762	5.87696	4.84907	5.32977	EO_DC
chr15	55053687	55054087	Peak13375	1.15385	0.00483074	5.2285	3.50125	4.09195	EO_DC
chr15	56257533	56257933	Peak13384	1.33928	0.000590874	5.64466	3.79641	4.74549	EO_DC
chr15	57448370	57448770	Peak13390	1.23223	0.00117045	5.80017	4.12716	5.03688	EO_DC
chr15	5845721	5846121	Peak13416	1.11171	0.000744415	6.11399	4.74133	5.97714	EO_DC
chr15	59353540	59353940	Peak13438	1.19572	0.00130292	5.72545	4.12813	4.70333	EO_DC
chr15	5980507	5980907	Peak13445	0.899304	0.008218	5.8751	4.74133	5.48781	EO_DC
chr15	61759277	61759677	Peak13452	0.812286	0.0319073	5.435	4.32715	4.97318	EO_DC
chr15	61844182	61844582	Peak13460	1.53274	0.000170642	5.52845	3.3627	4.50739	EO_DC
chr15	61955268	61955668	Peak13467	1.18301	0.00181977	5.55887	3.94711	4.97962	EO_DC
chr15	62790304	62790704	Peak13470	0.909083	0.00550846	6.09351	4.97269	5.81931	EO_DC
chr15	65581031	65581431	Peak13490	1.41397	0.000309226	5.63141	3.68496	4.19213	EO_DC
chr15	66902622	66903022	Peak13510	1.18392	6.59162e-05	6.58137	5.19052	5.87156	EO_DC
chr15	66930460	66930860	Peak13511	0.979101	0.011296	5.49782	4.12846	4.48494	EO_DC
chr15	73013649	73014049	Peak13553	0.825294	0.00761374	6.37016	5.38083	5.5223	EO_DC
chr15	76790622	76791022	Peak13698	1.67142	0.000147952	5.19449	2.62536	4.66606	EO_DC
chr15	77169003	77169403	Peak13715	0.62755	0.0427781	6.24782	5.50063	6.04304	EO_DC
chr15	77718775	77719175	Peak13739	0.892836	0.0133517	5.82628	4.65456	4.88019	EO_DC
chr15	81530904	81531304	Peak13917	2.26111	1.31313e-08	6.25712	3.43548	5.41927	EO_DC
chr15	84016606	84017006	Peak14015	0.973372	0.00541716	5.81461	4.56488	5.14578	EO_DC
chr15	84145046	84145446	Peak14022	0.931995	0.0132865	5.35375	4.08521	5.34413	EO_DC
chr15	89486908	89487308	Peak14158	1.0555	0.00580753	5.54353	4.08521	4.6511	EO_DC
chr15	90013506	90013906	Peak14164	1.07899	0.00442876	5.72732	4.25211	4.43808	EO_DC
chr15	9093922	9094322	Peak14176	0.928173	0.0191345	5.28646	3.95042	4.84983	EO_DC
chr15	93113711	93114111	Peak14194	0.90851	0.0177968	5.38803	4.12813	4.61132	EO_DC
chr15	97224874	97225274	Peak14281	0.981079	0.0110504	5.4998	4.12911	5.4474	EO_DC
chr15	9769825	9770225	Peak14301	1.82622	3.19709e-06	6.00945	3.62766	4.89977	EO_DC
chr15	98812475	98812875	Peak14357	0.822137	0.0215748	5.60373	4.53305	5.50902	EO_DC
chr15	99380308	99380708	Peak14389	0.95807	0.00514668	5.83856	4.62605	5.74824	EO_DC
chr16	10674083	10674483	Peak14439	0.837439	0.0421664	4.90007	3.62582	4.45541	EO_DC
chr16	11743063	11743463	Peak14466	1.02362	0.0096282	5.26662	3.79682	4.37732	EO_DC
chr16	13785995	13786395	Peak14496	0.890905	0.0136082	5.76603	4.59696	4.75576	EO_DC
chr16	14557220	14557620	Peak14514	1.29652	0.00064333	5.83804	4.08622	3.95369	EO_DC
chr16	15759819	15760219	Peak14522	0.994833	0.014503	5.1137	3.6249	4.33412	EO_DC
chr16	15958752	15959152	Peak14525	1.1005	0.00673069	5.1363	3.50226	5.01511	EO_DC
chr16	19083281	19083681	Peak14634	1.21274	0.000344273	6.33728	4.82198	4.57156	EO_DC
chr16	20191226	20191626	Peak14640	1.33741	0.00114826	5.33728	3.366	4.61132	EO_DC
chr16	20478609	20479009	Peak14649	1.1169	0.00446998	5.21133	3.62766	5.3791	EO_DC
chr16	21807845	21808245	Peak14702	1.02554	0.00645263	5.43638	4.04063	5.1949	EO_DC
chr16	23908432	23908832	Peak14762	1.05319	0.00169536	6.00119	4.68518	5.90361	EO_DC
chr16	25038510	25038910	Peak14771	1.40457	0.000834813	5.2486	3.12781	4.16567	EO_DC
chr16	30047602	30048002	Peak14811	0.83224	0.0241062	5.54417	4.4339	4.90654	EO_DC
chr16	30171596	30171996	Peak14818	0.952707	0.00699524	5.8275	4.5965	5.12136	EO_DC
chr16	32484479	32484879	Peak14902	0.76897	0.0417118	5.37123	4.32856	5.4571	EO_DC
chr16	33766908	33767308	Peak14962	1.01766	0.00496607	5.73842	4.39954	4.86636	EO_DC
chr16	33818909	33819309	Peak14963	0.984177	0.0192732	4.77683	3.21124	4.71213	EO_DC
chr16	34112563	34112963	Peak14977	0.881617	0.00925415	6.03176	4.92312	4.98516	EO_DC
chr16	34668480	34668880	Peak14984	0.974038	0.00759267	5.61662	4.32601	5.11766	EO_DC
chr16	34700336	34700736	Peak14986	0.748221	0.0498752	5.38614	4.36325	4.95131	EO_DC
chr16	35784508	35784908	Peak15019	0.902262	0.0320996	4.72863	3.28896	4.53706	EO_DC
chr16	38150622	38151022	Peak15072	1.15282	0.00329942	5.37004	3.74218	4.68875	EO_DC
chr16	38168051	38168451	Peak15073	1.60323	0.000225433	5.19476	2.74133	4.70049	EO_DC
chr16	39102212	39102612	Peak15109	1.32721	0.00151972	5.22982	3.21186	4.03295	EO_DC
chr16	40621193	40621593	Peak15114	1.40587	0.000999522	5.03176	2.84867	4.57041	EO_DC
chr16	4293305	4293705	Peak15138	1.11095	0.00275098	5.65759	4.17076	4.94803	EO_DC
chr16	43926522	43926922	Peak15150	1.39936	9.43831e-05	5.87561	4.08622	5.49232	EO_DC
chr16	44475626	44476026	Peak15168	1.3468	0.000246033	5.80248	4.04132	5.0514	EO_DC
chr16	48309034	48309434	Peak15219	0.882416	0.0167865	5.46855	4.29012	5.58737	EO_DC
chr16	48613896	48614296	Peak15230	0.888677	0.00881748	6.04166	4.92349	5.29803	EO_DC
chr16	48675704	48676104	Peak15233	0.732058	0.0453366	5.52888	4.56512	5.27013	EO_DC
chr16	4913737	4914137	Peak15241	0.755497	0.0249749	6.13447	5.19083	5.19617	EO_DC
chr16	49839720	49840120	Peak15249	0.887665	0.0277892	5.05119	3.74133	4.93242	EO_DC
chr16	50118246	50118646	Peak15252	0.864881	0.0281367	5.23088	3.99463	4.66897	EO_DC
chr16	50437415	50437815	Peak15258	1.03788	0.00800155	5.3698	3.89873	4.52831	EO_DC
chr16	52742368	52742768	Peak15277	1.30352	0.00329954	4.67216	2.36214	4.02843	EO_DC
chr16	56071448	56071848	Peak15297	1.03411	0.00366386	5.87544	4.53379	4.52831	EO_DC
chr16	56116279	56116679	Peak15299	0.911864	0.0217623	5.11513	3.79559	4.72264	EO_DC
chr16	57473745	57474145	Peak15318	1.74027	4.76416e-05	5.55845	3.03994	3.91573	EO_DC
chr16	57945390	57945790	Peak15323	1.01018	0.00710107	5.49936	4.12813	5.09868	EO_DC
chr16	58514557	58514957	Peak15325	1.17589	0.00385521	5.17389	3.43548	4.65806	EO_DC
chr16	59545191	59545591	Peak15334	1.01434	0.00317451	5.85159	4.56584	5.66752	EO_DC
chr16	64875643	64876043	Peak15359	0.97466	0.00943626	5.31938	3.99534	5.53925	EO_DC
chr16	68916134	68916534	Peak15371	0.802368	0.0422184	5.43385	4.29041	4.48164	EO_DC
chr16	71114463	71114863	Peak15376	1.34592	0.00067273	5.51474	3.62858	4.84279	EO_DC
chr16	71434992	71435392	Peak15377	1.25178	0.00159595	5.40464	3.62582	5.06742	EO_DC
chr16	72693709	72694109	Peak15382	1.64674	5.88509e-05	5.58989	3.28896	5.15226	EO_DC
chr16	73096987	73097387	Peak15387	1.16767	0.000546581	6.14397	4.68562	5.07263	EO_DC
chr16	73652228	73652628	Peak15389	1.15202	0.00654153	4.96805	3.12651	4.4692	EO_DC
chr16	7425795	7426195	Peak15391	1.53357	1.00952e-05	6.03252	4.12943	6.11113	EO_DC
chr16	77028858	77029258	Peak15409	0.796997	0.0343709	5.51582	4.43416	4.33914	EO_DC
chr16	79661657	79662057	Peak15429	0.818208	0.0430875	5.24808	4.04304	4.17131	EO_DC
chr16	81175741	81176141	Peak15431	1.00553	0.0191001	4.52974	2.84867	4.67005	EO_DC
chr16	81481285	81481685	Peak15433	0.830324	0.0133771	5.91108	4.87392	5.50293	EO_DC
chr16	83137513	83137913	Peak15436	0.774764	0.0366238	5.63061	4.59556	4.32404	EO_DC
chr16	84779317	84779717	Peak15450	1.21528	3.10215e-05	6.56773	5.15056	6.52531	EO_DC
chr16	84793574	84793974	Peak15451	0.770845	0.042356	5.30251	4.25092	5.08083	EO_DC
chr16	84825220	84825620	Peak15452	1.48775	2.54922e-05	6.04347	4.17171	5.78163	EO_DC
chr16	85080104	85080504	Peak15457	1.13535	0.00070092	6.183	4.76976	4.78714	EO_DC
chr16	87507908	87508308	Peak15489	1.05132	0.00451675	5.65916	4.25182	4.72648	EO_DC
chr16	87604188	87604588	Peak15492	1.4838	0.000172346	5.60393	3.56464	4.63895	EO_DC
chr16	87625794	87626194	Peak15494	1.16973	0.00348842	5.19341	3.50075	4.85684	EO_DC
chr16	87747036	87747436	Peak15502	0.824334	0.0318953	5.35399	4.21216	4.68087	EO_DC
chr16	89960500	89960900	Peak15522	0.816832	0.0270655	5.55803	4.46823	5.15641	EO_DC
chr16	90153666	90154066	Peak15529	1.44997	0.000570413	5.3015	3.12846	3.91573	EO_DC
chr16	90186337	90186737	Peak15532	0.718551	0.0250048	6.10443	5.23182	5.81031	EO_DC
chr16	90299890	90300290	Peak15538	0.857837	0.00634264	6.47056	5.43364	5.15357	EO_DC
chr16	90416891	90417291	Peak15544	1.33453	0.00114996	5.17472	3.2094	5.13506	EO_DC
chr16	90433791	90434191	Peak15546	0.7991	0.0235858	5.715	4.68473	5.57622	EO_DC
chr16	90437560	90437960	Peak15547	0.640599	0.0148973	7.06937	6.34622	6.41452	EO_DC
chr16	91029593	91029993	Peak15571	0.918644	0.0231778	4.98929	3.62674	4.7585	EO_DC
chr16	9149822	9150222	Peak15588	1.48792	4.82797e-06	6.38721	4.59556	5.73879	EO_DC
chr16	92103913	92104313	Peak15611	0.713094	0.0120175	6.58137	5.75635	6.51457	EO_DC
chr16	92468738	92469138	Peak15624	0.807763	0.00850172	6.11513	5.15024	6.5436	EO_DC
chr16	94001602	94002002	Peak15666	0.807708	0.0144963	6.06304	5.06428	5.3888	EO_DC
chr16	94800570	94800970	Peak15687	1.23447	0.000953547	5.8616	4.21032	5.03771	EO_DC
chr16	95988822	95989222	Peak15710	0.869682	0.00834673	6.09525	5.01869	4.99154	EO_DC
chr17	10088083	10088483	Peak15760	0.977773	0.0146106	5.1137	3.68628	4.82242	EO_DC
chr17	10625456	10625856	Peak15770	1.12254	0.00135491	5.76402	4.3263	5.84279	EO_DC
chr17	10760172	10760572	Peak15773	0.923627	0.0171104	5.33704	4.04201	4.70438	EO_DC
chr17	14438554	14438954	Peak15825	0.723053	0.0353365	6.16293	5.25152	4.7991	EO_DC
chr17	16907451	16907851	Peak15862	0.961587	0.0139588	4.98929	3.62582	5.7913	EO_DC
chr17	17134122	17134522	Peak15866	0.725765	0.00110912	7.43268	6.64123	6.81973	EO_DC
chr17	17333016	17333416	Peak15870	1.07832	0.00428988	5.15411	3.68672	6.5842	EO_DC
chr17	17749348	17749748	Peak15887	0.863377	0.0328246	4.77936	3.50075	5.57622	EO_DC
chr17	22882727	22883127	Peak15939	0.956171	0.016884	5.1926	3.79641	4.10967	EO_DC
chr17	25893750	25894150	Peak16065	1.22669	0.000361731	5.9795	4.43416	5.59311	EO_DC
chr17	27366630	27367030	Peak16141	0.972852	0.00699406	5.60312	4.32545	5.6252	EO_DC
chr17	27762741	27763141	Peak16157	1.04601	0.00430824	5.55824	4.1695	5.64246	EO_DC
chr17	31561714	31562114	Peak16356	0.796359	0.0363536	5.30226	4.21124	5.03379	EO_DC
chr17	32352616	32353016	Peak16397	0.906261	0.0161514	5.56076	4.32545	4.53269	EO_DC
chr17	32747230	32747630	Peak16412	1.64306	4.95902e-05	5.69972	3.43285	4.71599	EO_DC
chr17	34246380	34246780	Peak16485	1.44393	5.11035e-05	6.08469	4.25033	4.98922	EO_DC
chr17	3616405	3616805	Peak16608	0.929437	0.0185263	5.23193	3.89911	4.59044	EO_DC
chr17	37107431	37107831	Peak16632	1.03156	0.00222795	5.97792	4.68429	5.564	EO_DC
chr17	37134043	37134443	Peak16637	0.886089	0.00122788	6.67274	5.65614	6.54577	EO_DC
chr17	38127463	38127863	Peak16653	0.806501	0.031931	6.52716	5.43456	6.46285	EO_DC
chr17	40632494	40632894	Peak16660	0.943629	0.0104523	5.58742	4.32743	5.4872	EO_DC
chr17	43020751	43021151	Peak16671	0.929171	0.0213389	5.11656	3.74261	4.41452	EO_DC
chr17	43172954	43173354	Peak16674	1.72254	2.24393e-08	6.87426	4.87373	5.89342	EO_DC
chr17	43856370	43856770	Peak16685	1.08265	0.0101965	4.85313	3.12976	4.30505	EO_DC
chr17	43895502	43895902	Peak16686	1.05829	0.01569	4.52974	2.62904	4.29099	EO_DC
chr17	43969741	43970141	Peak16690	1.34702	0.00113149	5.21373	3.21186	4.7585	EO_DC
chr17	49703345	49703745	Peak16894	0.843054	0.0290122	5.38661	4.21155	4.46338	EO_DC
chr17	50566822	50567222	Peak16910	0.802607	0.015733	6.12533	5.12927	4.86382	EO_DC
chr17	53218657	53219057	Peak16936	1.06433	0.00511416	5.58948	4.12943	4.09195	EO_DC
chr17	54846900	54847300	Peak16961	0.805107	0.0255	5.73972	4.68738	5.59883	EO_DC
chr17	62461105	62461505	Peak17100	0.987912	0.00607911	5.65779	4.3638	5.48164	EO_DC
chr17	64178157	64178557	Peak17115	1.52052	1.82455e-05	6.0841	4.17076	5.14863	EO_DC
chr17	65570957	65571357	Peak17142	1.63467	3.32552e-05	5.69838	3.50175	5.29734	EO_DC
chr17	66073080	66073480	Peak17149	0.781207	0.0227185	5.88596	4.89968	5.61132	EO_DC
chr17	66650690	66651090	Peak17178	0.903975	0.0191481	5.30326	4.04166	4.74447	EO_DC
chr17	68043202	68043602	Peak17197	0.827021	0.034285	5.11656	3.94858	5.2675	EO_DC
chr17	70136394	70136794	Peak17222	0.805362	0.022985	5.72526	4.6854	5.181	EO_DC
chr17	7096581	7096981	Peak17229	0.712026	0.0459574	5.54565	4.62559	5.73879	EO_DC
chr17	71025868	71026268	Peak17231	1.14999	0.0012509	5.85227	4.36297	4.85684	EO_DC
chr17	71177888	71178288	Peak17244	0.645406	0.0220119	6.49991	5.75635	6.88019	EO_DC
chr17	71214307	71214707	Peak17249	0.815869	0.00959413	6.27529	5.28939	5.30505	EO_DC
chr17	71793506	71793906	Peak17262	1.09714	0.00700826	5.13546	3.50075	4.5295	EO_DC
chr17	72828618	72829018	Peak17273	1.34152	0.00100659	5.38756	3.43337	3.77339	EO_DC
chr17	74816200	74816600	Peak17307	1.07833	0.00766441	5.0951	3.50075	4.57041	EO_DC
chr17	81035197	81035597	Peak17394	1.55267	6.25153e-07	6.84707	5.01869	5.82338	EO_DC
chr17	81200690	81201090	Peak17401	0.825046	0.0343911	5.01084	3.84867	5.65659	EO_DC
chr17	82672235	82672635	Peak17417	0.811145	0.0264739	5.4366	4.3638	5.92954	EO_DC
chr17	83760519	83760919	Peak17432	0.863635	0.0440409	4.64605	3.20879	4.35408	EO_DC
chr17	84053954	84054354	Peak17444	0.732989	0.0426659	5.69819	4.74155	5.04611	EO_DC
chr17	84128355	84128755	Peak17452	0.883254	0.00524338	6.30251	5.23243	5.66006	EO_DC
chr17	84149890	84150290	Peak17454	1.51082	2.47382e-05	6.0841	4.1695	5.1126	EO_DC
chr17	84264663	84265063	Peak17460	0.7532	0.0330047	5.76512	4.79621	5.30318	EO_DC
chr17	84750640	84751040	Peak17480	1.75567	7.25579e-07	6.20293	4.04063	5.72264	EO_DC
chr17	85136041	85136441	Peak17496	1.34945	0.00135142	5.19232	3.12781	4.03462	EO_DC
chr17	85340694	85341094	Peak17502	1.99379	8.56654e-06	5.63301	2.74303	3.59883	EO_DC
chr17	85561923	85562323	Peak17507	0.792913	0.0265219	5.53189	4.50075	6.32885	EO_DC
chr17	88540854	88541254	Peak17604	0.861347	0.0180956	5.76457	4.62605	5.17692	EO_DC
chr17	88639826	88640226	Peak17606	1.41502	0.00106082	4.98773	2.74133	4.56614	EO_DC
chr17	88908305	88908705	Peak17623	0.735517	0.0169144	6.41206	5.53464	6.14721	EO_DC
chr17	88957862	88958262	Peak17626	1.00269	0.00382665	5.93511	4.65637	5.03379	EO_DC
chr17	89035926	89036326	Peak17631	0.969535	0.00778978	5.64664	4.36325	5.18176	EO_DC
chr17	93007316	93007716	Peak17664	0.801396	0.0356248	5.22956	4.12943	5.4026	EO_DC
chr17	93803341	93803741	Peak17669	1.39174	0.000514426	5.4681	3.50075	4.61959	EO_DC
chr17	93833927	93834327	Peak17670	0.962764	0.0272732	4.33998	2.6272	4.66606	EO_DC
chr17	93875388	93875788	Peak17671	1.7985	1.28022e-05	5.8268	3.36104	4.19766	EO_DC
chr17	93881667	93882067	Peak17672	1.34779	5.87346e-06	6.49903	4.92424	6.62977	EO_DC
chr17	93946718	93947118	Peak17673	0.995785	0.0135599	5.21026	3.74176	4.09195	EO_DC
chr17	95050826	95051226	Peak17675	1.24588	0.000230106	6.26546	4.71364	5.80949	EO_DC
chr18	13555664	13556064	Peak17744	0.784985	0.0326737	5.57488	4.53256	4.79081	EO_DC
chr18	16338382	16338782	Peak17763	1.07366	0.00523723	5.43889	3.94784	5.05223	EO_DC
chr18	20513922	20514322	Peak17780	1.53179	0.000437679	5.24782	2.84946	3.19213	EO_DC
chr18	20647695	20648095	Peak17781	0.878337	0.0219643	5.46877	4.25211	4.94891	EO_DC
chr18	20908194	20908594	Peak17789	1.2036	0.00110008	5.76621	4.1695	4.77709	EO_DC
chr18	21119923	21120323	Peak17795	0.670661	0.0210689	6.63031	5.84927	5.93694	EO_DC
chr18	21242574	21242974	Peak17802	1.05262	0.0173294	4.2314	2.21186	4.27537	EO_DC
chr18	25247107	25247507	Peak17858	0.86195	0.0458596	4.67371	3.21247	4.30643	EO_DC
chr18	30534509	30534909	Peak17885	0.872378	0.0257185	5.13489	3.89873	5.20992	EO_DC
chr18	31636112	31636512	Peak17893	0.793804	0.0294332	5.67332	4.62582	4.61434	EO_DC
chr18	32292292	32292692	Peak17906	1.00309	0.0108019	5.17417	3.74091	5.20317	EO_DC
chr18	33476751	33477151	Peak17921	0.936118	0.0260572	5.05597	3.5632	3.181	EO_DC
chr18	34943047	34943447	Peak17972	1.04034	0.00535191	5.61642	4.21216	4.66206	EO_DC
chr18	35501347	35501747	Peak17992	0.93308	0.00807038	5.88948	4.68562	5.13139	EO_DC
chr18	36575221	36575621	Peak18049	1.10436	0.000232288	6.41299	5.10749	6.48842	EO_DC
chr18	36609572	36609972	Peak18050	0.908716	0.0314788	4.58907	3.12716	4.89977	EO_DC
chr18	37609402	37609802	Peak18077	0.849548	0.0142431	5.85107	4.76851	5.22083	EO_DC
chr18	38286792	38287192	Peak18132	1.39038	0.000133507	5.96805	4.16918	4.84632	EO_DC
chr18	39323113	39323513	Peak18177	1.53352	0.000211172	5.4199	3.21063	4.44615	EO_DC
chr18	42170584	42170984	Peak18187	0.777696	0.0413817	5.35496	4.28838	4.93242	EO_DC
chr18	42845379	42845779	Peak18202	0.972505	0.0149509	5.26456	3.84789	4.47709	EO_DC
chr18	43367020	43367420	Peak18206	0.812776	0.0123103	6.26727	5.27065	4.52069	EO_DC
chr18	47074042	47074442	Peak18255	1.42917	0.000209221	5.61662	3.68628	5.2134	EO_DC
chr18	47129007	47129407	Peak18258	1.68442	6.79146e-05	5.469	3.04201	4.29991	EO_DC
chr18	49687003	49687403	Peak18271	1.57127	6.16352e-05	5.68697	3.56512	4.79081	EO_DC
chr18	49930562	49930962	Peak18275	0.929277	0.0171862	5.35569	4.04235	4.45079	EO_DC
chr18	52147928	52148328	Peak18294	0.990118	0.00858475	5.56055	4.21094	4.36262	EO_DC
chr18	53202525	53202925	Peak18301	1.35089	0.00184602	4.94392	2.74303	4.06357	EO_DC
chr18	56380622	56381022	Peak18332	0.877394	0.0468408	4.15327	2.49925	4.39187	EO_DC
chr18	56670745	56671145	Peak18336	1.08145	0.00580607	5.52824	3.99498	4.04079	EO_DC
chr18	56904589	56904989	Peak18346	1.37869	5.77943e-05	6.28251	4.5656	5.70527	EO_DC
chr18	57966275	57966675	Peak18360	0.956026	0.0179791	5.21186	3.796	3.40976	EO_DC
chr18	61111893	61112293	Peak18399	0.775431	0.0124958	6.32898	5.3986	5.54083	EO_DC
chr18	64348609	64349009	Peak18469	1.07888	0.0017228	5.93316	4.5656	5.47087	EO_DC
chr18	64710743	64711143	Peak18479	0.96232	0.0101833	5.63241	4.32828	4.75475	EO_DC
chr18	65752769	65753169	Peak18506	0.778422	0.0263429	5.73786	4.74049	5.87846	EO_DC
chr18	67372021	67372421	Peak18550	0.673477	0.0372981	6.18368	5.36394	5.60148	EO_DC
chr18	67427307	67427707	Peak18552	1.73437	1.93262e-06	6.02164	3.84749	5.92243	EO_DC
chr18	67501187	67501587	Peak18561	0.800204	0.00925305	6.301	5.34475	6.48729	EO_DC
chr18	68300278	68300678	Peak18589	0.867692	0.0252318	5.38827	4.17265	4.80175	EO_DC
chr18	68307894	68308294	Peak18590	0.86941	0.0197498	5.49936	4.32715	4.77709	EO_DC
chr18	70540404	70540804	Peak18626	1.04403	0.000309229	6.71976	5.50113	5.24168	EO_DC
chr18	71662879	71663279	Peak18637	0.867104	0.0206855	5.57384	4.40008	4.50293	EO_DC
chr18	73649448	73649848	Peak18643	0.857961	0.0394792	4.89841	3.56368	4.06962	EO_DC
chr18	75122926	75123326	Peak18675	0.7925	0.0277567	5.63161	4.59603	4.97318	EO_DC
chr18	75354351	75354751	Peak18682	0.958501	0.00400279	5.98945	4.79662	5.64799	EO_DC
chr18	75382792	75383192	Peak18684	1.11347	0.00261108	5.77593	4.28983	4.78347	EO_DC
chr18	75539812	75540212	Peak18692	0.879032	0.0126546	5.78971	4.65659	5.29803	EO_DC
chr18	75715777	75716177	Peak18702	1.09494	0.0033718	5.60332	4.12748	5.37798	EO_DC
chr18	76077590	76077990	Peak18720	0.731412	0.0139457	6.34554	5.48483	6.4002	EO_DC
chr18	77947513	77947913	Peak18774	0.834856	0.0279197	5.35472	4.20971	5.25429	EO_DC
chr18	80366619	80367019	Peak18813	0.768319	0.0234865	5.91157	4.94711	5.55599	EO_DC
chr18	81373384	81373784	Peak18837	1.11545	0.00484914	5.03116	3.43285	5.78947	EO_DC
chr18	82682824	82683224	Peak18854	0.775205	0.049211	6.07184	4.9716	6.57737	EO_DC
chr18	82695397	82695797	Peak18855	0.656835	0.0420263	6.12519	5.32672	5.51849	EO_DC
chr18	84272828	84273228	Peak18898	0.792107	0.0254954	5.76603	4.74282	5.09788	EO_DC
chr18	84938235	84938635	Peak18911	1.01014	0.00408137	5.95604	4.65502	4.81621	EO_DC
chr18	85672973	85673373	Peak18921	1.68297	1.21845e-07	6.77765	4.79518	5.22157	EO_DC
chr18	88757666	88758066	Peak18925	0.936018	0.0116968	5.72488	4.46643	4.30505	EO_DC
chr18	89039462	89039862	Peak18926	0.975039	0.0257506	4.49914	2.74473	3.97962	EO_DC
chr19	10204113	10204513	Peak18955	1.09138	0.00154383	6.01145	4.62674	4.69267	EO_DC
chr19	10905940	10906340	Peak18987	0.785645	0.0457058	5.15494	4.04166	4.80538	EO_DC
chr19	10982269	10982669	Peak18993	0.859424	0.019882	5.71198	4.56344	4.57041	EO_DC
chr19	12144055	12144455	Peak19012	0.924821	0.00403052	6.12604	4.99587	5.78581	EO_DC
chr19	12805430	12805830	Peak19018	0.828009	0.0379073	5.36932	4.17044	3.42871	EO_DC
chr19	18682493	18682893	Peak19054	0.948549	0.00725304	5.96758	4.74112	4.90407	EO_DC
chr19	23140019	23140419	Peak19087	0.943826	0.022051	5.00899	3.56464	4.35769	EO_DC
chr19	23226228	23226628	Peak19095	0.782988	0.00985263	6.29387	5.36339	5.98836	EO_DC
chr19	23542280	23542680	Peak19101	0.984166	0.00634264	5.61824	4.32658	5.40085	EO_DC
chr19	28257201	28257601	Peak19163	0.816878	0.0196407	5.67371	4.62628	5.66352	EO_DC
chr19	28709437	28709837	Peak19165	0.954334	0.0179862	5.09539	3.68584	4.37244	EO_DC
chr19	28724062	28724462	Peak19166	1.11759	0.00555322	5.26456	3.62536	4.59883	EO_DC
chr19	29049753	29050153	Peak19174	0.709612	0.0422184	5.77738	4.87411	5.19692	EO_DC
chr19	29082592	29082992	Peak19176	0.737045	0.00807038	6.63111	5.78335	6.52421	EO_DC
chr19	30170629	30171029	Peak19205	0.766293	0.0339939	5.65857	4.65592	4.82956	EO_DC
chr19	31996131	31996531	Peak19218	0.899307	0.0279188	5.15411	3.79845	4.06962	EO_DC
chr19	32418964	32419364	Peak19229	0.780767	0.0155787	6.12377	5.17013	5.78898	EO_DC
chr19	33530821	33531221	Peak19252	0.894223	0.0070438	5.93365	4.82278	5.68875	EO_DC
chr19	37995710	37996110	Peak19322	0.814271	0.0193905	5.7247	4.6854	5.92365	EO_DC
chr19	39050821	39051221	Peak19357	1.3203	0.00078132	5.4681	3.6272	4.77709	EO_DC
chr19	41146080	41146480	Peak19397	0.819694	0.03544	5.40464	4.25182	3.98602	EO_DC
chr19	42396790	42397190	Peak19462	0.733892	0.0164802	6.1242	5.25033	6.63386	EO_DC
chr19	43573327	43573727	Peak19492	0.715143	0.0206855	6.14439	5.29041	6.64172	EO_DC
chr19	43948817	43949217	Peak19507	0.934622	0.0152761	5.38803	4.08521	4.70826	EO_DC
chr19	44355305	44355705	Peak19534	0.706229	0.0128607	6.65291	5.83519	5.86161	EO_DC
chr19	45346445	45346845	Peak19598	1.09376	0.00617065	5.2124	3.6249	4.72264	EO_DC
chr19	46068116	46068516	Peak19626	1.00817	0.00325026	5.98914	4.71342	5.76883	EO_DC
chr19	46319221	46319621	Peak19642	0.796125	0.0267805	5.7533	4.71429	4.59044	EO_DC
chr19	46510123	46510523	Peak19655	0.835473	0.0286149	5.51452	4.36463	4.97405	EO_DC
chr19	47062867	47063267	Peak19683	0.730252	0.0166759	6.28455	5.41629	5.90946	EO_DC
chr19	47525149	47525549	Peak19720	0.933508	0.00133234	6.82045	5.72787	5.79363	EO_DC
chr19	47823502	47823902	Peak19733	0.810974	0.0380961	5.23088	4.08588	4.61847	EO_DC
chr19	4787556	4787956	Peak19738	1.12951	0.00240173	5.76548	4.24883	4.603	EO_DC
chr19	53132798	53133198	Peak19801	0.87799	0.0111177	5.96615	4.84848	5.14369	EO_DC
chr19	55663544	55663944	Peak19874	0.932751	0.00541775	5.98867	4.82278	5.31966	EO_DC
chr19	5841466	5841866	Peak19958	0.677906	0.0468591	5.64446	4.796	6.38913	EO_DC
chr19	60025650	60026050	Peak19998	1.2963	0.00254146	5.03449	2.95005	4.00337	EO_DC
chr19	6401377	6401777	Peak20050	0.640442	0.040299	6.34676	5.58018	5.50576	EO_DC
chr2	101711364	101711764	Peak20163	1.06089	0.00677078	5.35327	3.84907	4.49845	EO_DC
chr2	101801577	101801977	Peak20166	1.15295	0.000332856	6.27734	4.87314	5.96347	EO_DC
chr2	101821333	101821733	Peak20167	0.960118	0.0219694	4.64763	3.12911	5.14863	EO_DC
chr2	102006594	102006994	Peak20181	0.858858	0.013564	5.83838	4.74176	5.40085	EO_DC
chr2	103150835	103151235	Peak20195	0.713685	0.0389958	5.82768	4.92499	5.41214	EO_DC
chr2	103938943	103939343	Peak20218	1.03028	0.0152711	4.80284	3.13105	4.25959	EO_DC
chr2	106305977	106306377	Peak20272	1.15885	0.0020387	5.51474	3.94858	5.15641	EO_DC
chr2	106760455	106760855	Peak20282	1.15062	0.000849013	6.08293	4.62674	5.01908	EO_DC
chr2	107355650	107356050	Peak20287	0.70202	0.0318953	6.0307	5.16997	6.15963	EO_DC
chr2	109050694	109051094	Peak20290	1.65334	6.21222e-05	5.61541	3.29012	4.54142	EO_DC
chr2	112337984	112338384	Peak20323	0.765467	0.00875859	6.36409	5.46784	6.63766	EO_DC
chr2	115519622	115520022	Peak20358	1.19544	0.00440942	5.0739	3.21308	3.97318	EO_DC
chr2	116068912	116069312	Peak20371	1.03395	0.00154676	6.04272	4.77018	6.02178	EO_DC
chr2	116768100	116768500	Peak20377	0.792447	0.0391528	5.26559	4.1695	5.24703	EO_DC
chr2	117325467	117325867	Peak20394	0.863378	0.0297496	5.09423	3.84749	4.90316	EO_DC
chr2	119055587	119055987	Peak20444	0.898598	0.0242376	5.15383	3.84907	4.46338	EO_DC
chr2	119533431	119533831	Peak20467	1.33204	0.00013169	6.04256	4.36242	5.24168	EO_DC
chr2	12127541	12127941	Peak20522	1.24135	0.00234978	5.2674	3.4339	4.31389	EO_DC
chr2	121347743	121348143	Peak20528	1.08943	0.00477497	5.64545	4.12683	4.03462	EO_DC
chr2	122128364	122128764	Peak20552	0.709628	0.0194648	6.46866	5.62732	5.6267	EO_DC
chr2	122160035	122160435	Peak20555	0.913922	0.0155092	5.4987	4.25211	5.09868	EO_DC
chr2	127430964	127431364	Peak20637	1.45223	4.2565e-05	5.96631	4.12911	5.66951	EO_DC
chr2	129707669	129708069	Peak20694	0.805764	0.0377754	5.33753	4.20971	4.65404	EO_DC
chr2	130109617	130110017	Peak20701	0.770792	0.0329719	5.57321	4.5644	5.37732	EO_DC
chr2	130593250	130593650	Peak20721	0.904786	0.0256682	5.03146	3.68496	4.43682	EO_DC
chr2	134786350	134786750	Peak20809	0.997799	0.00415116	5.98976	4.71385	4.46003	EO_DC
chr2	135440473	135440873	Peak20817	0.993	0.0024408	6.17403	4.94931	5.89218	EO_DC
chr2	135607121	135607521	Peak20824	0.83251	0.0377721	5.00991	3.79682	4.94145	EO_DC
chr2	135883717	135884117	Peak20826	0.80175	0.0420129	5.35181	4.21094	4.55442	EO_DC
chr2	13619219	13619619	Peak20830	1.39058	0.000131316	5.96758	4.17076	4.52831	EO_DC
chr2	13899201	13899601	Peak20848	1.1151	0.0097229	4.72751	2.85025	4.36395	EO_DC
chr2	142943293	142943693	Peak20877	0.885014	0.00646386	5.90926	4.82278	6.5308	EO_DC
chr2	143505253	143505653	Peak20882	1.11883	0.00171838	5.85073	4.39847	5.2424	EO_DC
chr2	143771206	143771606	Peak20889	1.12336	0.00106621	6.10472	4.68518	4.6102	EO_DC
chr2	146292504	146292904	Peak20938	0.916734	0.0191858	5.24912	3.94821	4.54577	EO_DC
chr2	147948212	147948612	Peak20969	1.02845	0.00693741	5.54459	4.12911	4.35274	EO_DC
chr2	148532496	148532896	Peak20978	0.988028	0.00468276	5.86262	4.59603	5.17055	EO_DC
chr2	148984135	148984535	Peak20984	0.878671	0.0227644	5.35569	4.13008	4.82956	EO_DC
chr2	150773768	150774168	Peak21020	1.13034	0.000242054	6.34493	4.99534	6.28155	EO_DC
chr2	152552609	152553009	Peak21091	0.879863	0.00398531	6.41287	5.3627	5.39122	EO_DC
chr2	152933288	152933688	Peak21112	0.734186	0.0221877	6.0844	5.1913	5.75013	EO_DC
chr2	154941180	154941580	Peak21186	0.807453	0.0225772	5.69819	4.65569	5.60661	EO_DC
chr2	156104443	156104843	Peak21229	0.79877	0.0306436	5.49892	4.43311	5.13506	EO_DC
chr2	157474749	157475149	Peak21294	1.01759	0.0111207	5.11542	3.62812	4.9764	EO_DC
chr2	158439367	158439767	Peak21331	0.743467	0.0485674	5.40441	4.39981	5.09195	EO_DC
chr2	158894984	158895384	Peak21346	0.949766	0.01476	5.46832	4.12748	4.68375	EO_DC
chr2	15939335	15939735	Peak21348	0.914499	0.00759968	5.89974	4.74112	5.18658	EO_DC
chr2	160341629	160342029	Peak21358	0.964965	0.0230095	5.07007	3.50025	3.84374	EO_DC
chr2	162782636	162783036	Peak21386	0.886054	0.0318225	5.15243	3.79518	4.3013	EO_DC
chr2	162887809	162888209	Peak21394	1.08742	5.47849e-05	6.9671	5.72766	6.23973	EO_DC
chr2	163318819	163319219	Peak21416	0.76086	0.038479	5.75091	4.74324	4.75201	EO_DC
chr2	164692265	164692665	Peak21466	0.740435	0.0254058	5.95732	5.04149	5.65806	EO_DC
chr2	165633649	165634049	Peak21512	1.0589	0.000295441	6.52964	5.28867	6.21029	EO_DC
chr2	165644962	165645362	Peak21515	0.621099	0.0344763	6.45289	5.72787	6.17616	EO_DC
chr2	166481876	166482276	Peak21564	0.86279	0.00703689	6.20145	5.1504	5.55814	EO_DC
chr2	169919767	169920167	Peak21699	0.848598	0.0165048	5.75312	4.65614	5.30061	EO_DC
chr2	171368276	171368676	Peak21740	0.966429	0.00763155	5.89858	4.62513	5.1528	EO_DC
chr2	171704690	171705090	Peak21742	0.791366	0.00972681	6.42759	5.48344	5.84279	EO_DC
chr2	172402721	172403121	Peak21765	0.641416	0.0153627	6.96663	6.2414	6.63032	EO_DC
chr2	172444700	172445100	Peak21767	0.797394	0.0152518	5.97918	4.99534	5.68875	EO_DC
chr2	172564578	172564978	Peak21771	0.811961	0.0262357	5.70048	4.62651	4.42272	EO_DC
chr2	172653409	172653809	Peak21774	0.780919	0.0371219	5.45199	4.39874	4.85334	EO_DC
chr2	173110226	173110626	Peak21799	0.892943	0.0202037	5.37147	4.13105	5.27013	EO_DC
chr2	173130640	173131040	Peak21802	0.827611	0.0254544	5.57571	4.4672	4.96435	EO_DC
chr2	17899845	17900245	Peak21888	1.19869	0.00124878	5.49804	3.89911	5.82599	EO_DC
chr2	179812333	179812733	Peak21910	1.04369	0.00319064	5.94473	4.59556	4.01596	EO_DC
chr2	180462317	180462717	Peak21943	1.35345	6.59747e-06	6.67226	5.08471	6.20692	EO_DC
chr2	180794926	180795326	Peak21959	0.801517	0.0288713	5.77593	4.7132	4.49068	EO_DC
chr2	181272427	181272827	Peak21984	0.791909	0.0360902	5.40394	4.32658	4.79081	EO_DC
chr2	19314369	19314769	Peak22025	1.19251	0.0020619	5.45176	3.79437	5.14004	EO_DC
chr2	20447806	20448206	Peak22045	0.815181	0.00941318	6.1548	5.17123	6.00696	EO_DC
chr2	21966584	21966984	Peak22076	0.815749	0.0284727	5.62961	4.53403	4.68875	EO_DC
chr2	23308696	23309096	Peak22091	1.25349	0.00191489	5.38709	3.5632	4.10379	EO_DC
chr2	31019176	31019576	Peak22391	1.42682	4.3839e-06	6.53847	4.84808	5.88659	EO_DC
chr2	31618418	31618818	Peak22413	0.696238	0.0436934	5.8509	4.97251	5.38219	EO_DC
chr2	3166104	3166504	Peak22415	0.851285	0.0373339	5.22903	3.95042	3.86288	EO_DC
chr2	32008793	32009193	Peak22430	1.27084	0.000609711	5.81337	4.12911	4.9291	EO_DC
chr2	32930418	32930818	Peak22493	1.18802	0.00167051	5.56013	3.94821	4.76968	EO_DC
chr2	35701323	35701723	Peak22579	1.10198	0.00488567	5.35472	3.79559	4.47709	EO_DC
chr2	36733653	36734053	Peak22592	0.918927	0.0257443	4.9709	3.56464	4.88955	EO_DC
chr2	39324299	39324699	Peak22652	1.42547	0.000309506	5.60169	3.6249	5.22969	EO_DC
chr2	4142779	4143179	Peak22659	0.833876	0.0140408	6.13419	5.08588	3.7303	EO_DC
chr2	44412356	44412756	Peak22674	0.850463	0.0244145	5.5595	4.39954	4.39669	EO_DC
chr2	4471372	4471772	Peak22676	0.871698	0.0407318	4.46743	3.0427	5.27919	EO_DC
chr2	4496213	4496613	Peak22680	0.838188	0.0147031	5.93689	4.87392	6.12783	EO_DC
chr2	4888919	4889319	Peak22701	0.921057	0.0257506	4.77756	3.36325	4.90654	EO_DC
chr2	49667088	49667488	Peak22711	0.869534	0.0246261	5.38638	4.17044	4.67798	EO_DC
chr2	50542728	50543128	Peak22720	1.18444	0.00034302	6.33581	4.87489	4.95131	EO_DC
chr2	50863239	50863639	Peak22724	1.35129	0.000676337	5.40394	3.50025	4.82956	EO_DC
chr2	51609136	51609536	Peak22734	1.02455	0.00524208	5.57425	4.21186	5.14863	EO_DC
chr2	5293943	5294343	Peak22759	1.41237	0.000422167	5.35472	3.36214	5.16208	EO_DC
chr2	5505733	5506133	Peak22770	1.37535	0.000169398	5.99778	4.21124	5.2134	EO_DC
chr2	55075011	55075411	Peak22772	0.814667	0.0427963	4.87544	3.68451	5.30761	EO_DC
chr2	56618090	56618490	Peak22780	0.893136	0.0232485	5.40511	4.1304	4.16567	EO_DC
chr2	56761436	56761836	Peak22781	0.994476	0.0119369	5.11513	3.68584	5.03379	EO_DC
chr2	58311417	58311817	Peak22798	0.866648	0.0305307	5.11485	3.85025	4.63079	EO_DC
chr2	59069484	59069884	Peak22810	1.15147	7.14798e-06	7.04898	5.75583	6.72264	EO_DC
chr2	59223636	59224036	Peak22815	1.25844	5.62669e-05	6.3291	4.82378	6.37976	EO_DC
chr2	59583487	59583887	Peak22832	0.807058	0.0432568	5.11656	3.94895	4.91664	EO_DC
chr2	60213359	60213759	Peak22853	1.02193	0.0105569	5.17417	3.68451	4.61434	EO_DC
chr2	60222722	60223122	Peak22856	1.22379	0.00129045	5.75054	4.08622	5.09059	EO_DC
chr2	60249182	60249582	Peak22857	1.69287	3.16162e-06	6.07508	3.94674	5.66206	EO_DC
chr2	60252346	60252746	Peak22858	1.14415	0.000598406	6.10487	4.68429	5.49906	EO_DC
chr2	61179365	61179765	Peak22875	1.12126	0.00830426	4.85004	3.04063	4.31016	EO_DC
chr2	63379924	63380324	Peak22901	0.899629	0.0162838	5.61662	4.39874	3.96671	EO_DC
chr2	65259345	65259745	Peak22918	1.1018	0.0048945	5.64248	4.08354	4.83925	EO_DC
chr2	65274964	65275364	Peak22919	1.25871	0.00147761	5.469	3.68584	4.01596	EO_DC
chr2	68136387	68136787	Peak22938	0.942087	0.0149031	5.11513	3.79518	5.67005	EO_DC
chr2	68582674	68583074	Peak22944	1.04992	0.0124034	5.09539	3.43653	3.76596	EO_DC
chr2	68885894	68886294	Peak22953	1.13907	0.000623856	6.18327	4.77101	5.81343	EO_DC
chr2	70457317	70457717	Peak22985	1.22139	0.00113172	5.72732	4.08555	4.42399	EO_DC
chr2	73911386	73911786	Peak23088	1.47915	0.000111715	5.87443	3.90101	5.16849	EO_DC
chr2	75707626	75708026	Peak23116	1.18852	0.000339985	6.09539	4.62674	5.67943	EO_DC
chr2	77424975	77425375	Peak23155	0.936088	0.0029372	6.36372	5.23167	5.0575	EO_DC
chr2	78122044	78122444	Peak23159	1.38617	0.000100018	6.09423	4.32715	4.32909	EO_DC
chr2	87321322	87321722	Peak23237	1.40479	0.00041993	5.47079	3.49925	5.21066	EO_DC
chr2	87355782	87356182	Peak23238	1.15539	0.00397036	4.96583	3.28896	5.82242	EO_DC
chr2	87374944	87375344	Peak23240	1.10016	0.00365121	5.62941	4.13073	5.26487	EO_DC
chr2	87963043	87963443	Peak23241	0.863366	0.0168261	5.95476	4.82158	4.25041	EO_DC
chr2	90465101	90465501	Peak23246	0.888383	0.017637	5.5291	4.3263	4.67005	EO_DC
chr2	93708936	93709336	Peak23357	1.1479	0.00130476	5.92134	4.43285	4.9282	EO_DC
chr2	93767881	93768281	Peak23361	0.899925	0.00959211	5.86433	4.71493	5.36575	EO_DC
chr2	98684463	98684863	Peak23393	0.8023	0.010644	6.43523	5.46733	5.13716	EO_DC
chr3	101907726	101908126	Peak23445	0.718393	0.0355622	5.67177	4.76893	6.30026	EO_DC
chr3	102992478	102992878	Peak23476	0.907993	0.0132282	5.73935	4.53256	4.54459	EO_DC
chr3	103187098	103187498	Peak23485	0.746441	0.0251803	5.96805	5.04149	5.55756	EO_DC
chr3	103575615	103576015	Peak23499	0.855823	0.0347042	5.01207	3.74261	4.69943	EO_DC
chr3	104031324	104031724	Peak23510	1.01848	0.000386361	6.56679	5.38083	6.33035	EO_DC
chr3	104300135	104300535	Peak23513	1.29251	0.00207887	5.11571	3.12716	4.45417	EO_DC
chr3	105792552	105792952	Peak23550	1.03564	0.00770871	5.45131	3.99427	4.61546	EO_DC
chr3	107798898	107799298	Peak23585	0.829449	0.0290479	5.3878	4.25092	4.65806	EO_DC
chr3	109585118	109585518	Peak23631	0.845974	0.0205838	5.68523	4.56584	4.86288	EO_DC
chr3	110650125	110650525	Peak23634	1.10428	0.00315764	5.74065	4.25092	4.20169	EO_DC
chr3	113451201	113451601	Peak23643	1.00877	0.0116194	5.36908	3.90025	4.07564	EO_DC
chr3	115561628	115562028	Peak23652	1.542	0.000251585	5.40253	3.13105	4.65001	EO_DC
chr3	117831212	117831612	Peak23686	1.67597	1.78859e-05	5.79061	3.56656	5.47771	EO_DC
chr3	121321244	121321644	Peak23721	1.01274	0.0096394	5.28468	3.84789	4.63079	EO_DC
chr3	127247613	127248013	Peak23800	1.15171	0.00121452	5.85279	4.36214	5.3516	EO_DC
chr3	128930413	128930813	Peak23821	1.30002	0.000677762	5.76293	3.99534	4.48616	EO_DC
chr3	129277982	129278382	Peak23834	1.15574	0.000206116	6.28493	4.8993	6.05181	EO_DC
chr3	129353904	129354304	Peak23838	1.23133	0.0018266	5.37076	3.62628	4.7303	EO_DC
chr3	129601799	129602199	Peak23847	0.830576	0.020468	5.73953	4.65704	4.84279	EO_DC
chr3	133187579	133187979	Peak23895	1.83059	5.10166e-08	6.35339	4.16918	6.74447	EO_DC
chr3	133539408	133539808	Peak23903	0.769194	0.0388842	5.65818	4.62789	4.72264	EO_DC
chr3	135778735	135779135	Peak23935	0.998184	0.00276849	5.8999	4.65637	5.96228	EO_DC
chr3	138478219	138478619	Peak23972	1.06733	0.00524338	5.46832	3.99534	4.81621	EO_DC
chr3	139271091	139271491	Peak23980	1.30769	0.000682725	5.53017	3.74176	4.86983	EO_DC
chr3	14191286	14191686	Peak23990	0.965971	0.0162861	5.26714	3.84631	4.45541	EO_DC
chr3	142303171	142303571	Peak23997	0.781138	0.0351485	5.54523	4.50125	5.08164	EO_DC
chr3	142313114	142313514	Peak23998	1.11924	0.00169934	5.81584	4.3638	4.96347	EO_DC
chr3	142592908	142593308	Peak24004	1.79809	7.25579e-07	6.32062	4.08521	4.22896	EO_DC
chr3	144273632	144274032	Peak24027	0.824872	0.00354964	6.55164	5.59661	6.62081	EO_DC
chr3	144401299	144401699	Peak24031	0.777625	0.019096	6.15466	5.19114	5.67257	EO_DC
chr3	145890916	145891316	Peak24066	1.61808	6.99677e-05	5.68658	3.4339	3.69943	EO_DC
chr3	146274255	146274655	Peak24077	0.856583	0.044845	4.61703	3.21186	4.2844	EO_DC
chr3	146429195	146429595	Peak24080	0.956573	0.0174786	5.09394	3.6854	4.61546	EO_DC
chr3	148748171	148748571	Peak24098	1.01798	0.00332001	5.7653	4.46746	5.63284	EO_DC
chr3	14907419	14907819	Peak24103	0.962572	0.0157784	5.48381	4.08521	4.35046	EO_DC
chr3	151100619	151101019	Peak24110	0.856996	0.0128028	6.01161	4.92406	4.42272	EO_DC
chr3	153022925	153023325	Peak24155	0.940845	0.00749215	5.71387	4.501	5.9136	EO_DC
chr3	154044476	154044876	Peak24181	0.945155	0.0127198	5.46698	4.17171	5.0222	EO_DC
chr3	154294220	154294620	Peak24185	1.81143	1.99332e-05	5.68831	3.13105	4.49068	EO_DC
chr3	154702392	154702792	Peak24191	1.33592	0.000310118	6.01099	4.25033	3.57582	EO_DC
chr3	155862755	155863155	Peak24194	1.09334	0.00556408	5.30326	3.74303	4.78347	EO_DC
chr3	156224146	156224546	Peak24195	0.824872	0.0306431	5.49848	4.36408	4.32404	EO_DC
chr3	157595055	157595455	Peak24203	1.80958	3.94374e-07	6.35448	4.12781	4.98282	EO_DC
chr3	15951721	15952121	Peak24216	0.747145	0.0283924	5.88747	4.94839	5.19213	EO_DC
chr3	19400946	19401346	Peak24245	1.45178	0.000415466	5.46586	3.3627	4.57041	EO_DC
chr3	19923863	19924263	Peak24250	0.769717	0.00733699	6.42816	5.53231	6.89126	EO_DC
chr3	22071232	22071632	Peak24276	0.851074	0.0255417	5.49739	4.32715	4.86382	EO_DC
chr3	24905709	24906109	Peak24288	1.12821	0.00220117	5.75164	4.25062	4.29991	EO_DC
chr3	26507448	26507848	Peak24295	1.41603	0.000947263	5.05448	2.84867	4.61959	EO_DC
chr3	27305391	27305791	Peak24308	1.07598	0.00980243	5.17334	3.49975	2.74549	EO_DC
chr3	27440213	27440613	Peak24309	1.10088	0.0066916	5.13405	3.49925	4.62259	EO_DC
chr3	28642218	28642618	Peak24326	1.27031	0.000815391	5.71443	3.99534	4.18658	EO_DC
chr3	28923840	28924240	Peak24331	1.38599	0.000896873	5.11542	3.04201	4.87329	EO_DC
chr3	31304821	31305221	Peak24368	1.42908	4.06096e-05	6.25803	4.46669	4.10967	EO_DC
chr3	32240346	32240746	Peak24373	0.85753	0.0137347	5.75146	4.65637	5.50962	EO_DC
chr3	33934685	33935085	Peak24403	0.737377	0.0272129	5.78918	4.87411	6.33446	EO_DC
chr3	3977362	3977762	Peak24471	0.855315	0.0215298	5.61864	4.46746	4.35769	EO_DC
chr3	41360975	41361375	Peak24493	0.80249	0.00531396	6.48459	5.54942	6.33446	EO_DC
chr3	45050564	45050964	Peak24502	1.244	0.00270041	5.01115	3.12716	5.14082	EO_DC
chr3	46673734	46674134	Peak24510	0.795437	0.0424642	5.33532	4.21216	4.64301	EO_DC
chr3	50932432	50932832	Peak24516	1.30256	3.66946e-05	6.43683	4.87392	5.35341	EO_DC
chr3	51131288	51131688	Peak24526	1.2937	0.000537363	5.76493	4.04235	4.60717	EO_DC
chr3	51181838	51182238	Peak24532	0.945897	0.0198158	5.15327	3.74303	4.65914	EO_DC
chr3	51403008	51403408	Peak24540	1.10532	0.000852309	6.2683	4.89835	5.3178	EO_DC
chr3	63047873	63048273	Peak24663	1.32657	0.00115676	5.30251	3.3638	4.42399	EO_DC
chr3	65281046	65281446	Peak24679	0.876366	0.0409331	4.50046	3.04132	4.95219	EO_DC
chr3	69400065	69400465	Peak24733	1.05723	0.0140118	4.72413	2.94784	4.06962	EO_DC
chr3	7166599	7166999	Peak24739	0.695992	0.0266114	6.3704	5.5344	6.12823	EO_DC
chr3	80825557	80825957	Peak24789	0.939176	0.0190008	5.31913	3.94637	4.04528	EO_DC
chr3	8123754	8124154	Peak24792	0.79783	0.0476842	5.11485	3.94674	4.58737	EO_DC
chr3	82186271	82186671	Peak24798	0.761127	0.0456631	5.4037	4.36352	4.65001	EO_DC
chr3	8304646	8305046	Peak24807	0.815677	0.0441159	5.15383	3.94931	3.95369	EO_DC
chr3	83995247	83995647	Peak24837	0.863214	0.00813873	6.12604	5.06326	5.35835	EO_DC
chr3	84141353	84141753	Peak24842	1.19367	0.00161548	5.61683	3.99534	4.5501	EO_DC
chr3	84656824	84657224	Peak24858	0.905533	0.0176289	5.4199	4.17108	4.70049	EO_DC
chr3	86583623	86584023	Peak24888	0.774988	0.0352366	5.52974	4.5005	5.00423	EO_DC
chr3	86754519	86754919	Peak24901	0.97668	0.0148885	5.11542	3.68496	4.50293	EO_DC
chr3	86790431	86790831	Peak24902	1.02234	0.00870842	5.43935	3.99641	4.87926	EO_DC
chr3	87668075	87668475	Peak24935	1.24819	0.000898149	5.67196	3.99534	4.91328	EO_DC
chr3	87697257	87697657	Peak24937	0.782302	0.0275513	5.90959	4.89816	5.05972	EO_DC
chr3	89604023	89604423	Peak25081	0.854537	0.00351795	6.55175	5.55002	6.08233	EO_DC
chr3	89630295	89630695	Peak25083	0.849376	0.0443996	4.64802	3.28954	4.76968	EO_DC
chr3	89940547	89940947	Peak25100	1.44924	0.000327898	5.48404	3.4339	4.39539	EO_DC
chr3	90645119	90645519	Peak25133	1.04333	0.0130894	4.94328	3.29128	4.49518	EO_DC
chr3	92619890	92620290	Peak25144	0.952792	0.0040982	6.0822	4.89911	6.06357	EO_DC
chr3	94653282	94653682	Peak25182	0.982847	0.0124413	5.30251	3.90063	4.5501	EO_DC
chr3	9599724	9600124	Peak25251	1.09525	0.00286967	5.88982	4.43521	4.76596	EO_DC
chr3	96213831	96214231	Peak25266	0.668955	0.0307382	6.26649	5.46848	6.05181	EO_DC
chr3	96479665	96480065	Peak25290	0.636194	0.0313632	6.29387	5.54893	6.54468	EO_DC
chr4	101061328	101061728	Peak25373	1.40463	3.04639e-05	6.16403	4.43364	5.71828	EO_DC
chr4	101180138	101180538	Peak25376	0.910509	0.004164	6.27709	5.17092	5.91664	EO_DC
chr4	103511034	103511434	Peak25404	0.904189	0.0214303	5.28519	3.99569	4.24897	EO_DC
chr4	104187196	104187596	Peak25409	0.840676	0.0116653	6.15411	5.10864	5.40802	EO_DC
chr4	104962266	104962666	Peak25424	1.20323	0.00136671	5.75017	4.12878	4.63488	EO_DC
chr4	105365022	105365422	Peak25433	1.06195	0.0061863	5.38709	3.89797	4.81524	EO_DC
chr4	108662133	108662533	Peak25536	0.890033	0.0441982	5.55929	3.84552	4.08002	EO_DC
chr4	10941148	10941548	Peak25557	1.22957	0.000350621	5.87544	4.32686	5.89001	EO_DC
chr4	10942290	10942690	Peak25558	0.955997	0.00834189	5.88529	4.62605	5.50414	EO_DC
chr4	10972270	10972670	Peak25566	1.18698	0.000651955	5.9773	4.46771	5.12638	EO_DC
chr4	110891911	110892311	Peak25580	0.927012	0.0295293	4.37123	2.85104	5.50739	EO_DC
chr4	111635846	111636246	Peak25587	1.0851	0.0117424	4.67216	2.84946	4.23973	EO_DC
chr4	115545726	115546126	Peak25631	0.939272	0.0107461	5.85038	4.59767	4.8286	EO_DC
chr4	116070501	116070901	Peak25652	0.785388	0.0458596	5.28391	4.17108	4.31526	EO_DC
chr4	116729190	116729590	Peak25679	0.725705	0.0134528	6.26624	5.41656	6.81883	EO_DC
chr4	116875039	116875439	Peak25691	0.773963	0.019132	6.04166	5.08538	5.809	EO_DC
chr4	116883425	116883825	Peak25692	0.926755	0.00336047	6.41136	5.28867	5.58201	EO_DC
chr4	117052985	117053385	Peak25707	1.38777	0.000148222	5.8868	4.08488	5.03069	EO_DC
chr4	119011511	119011911	Peak25788	0.96778	0.00369686	6.10414	4.89892	5.07182	EO_DC
chr4	119487936	119488336	Peak25802	0.83249	0.0285598	5.35302	4.21186	5.08083	EO_DC
chr4	121408330	121408730	Peak25850	1.65281	0.000113078	5.2862	2.85104	5.19692	EO_DC
chr4	123340158	123340558	Peak25886	0.716537	0.0252286	6.32	5.44935	5.74498	EO_DC
chr4	123731595	123731995	Peak25903	1.16778	0.00124537	5.77846	4.25033	5.00337	EO_DC
chr4	124811449	124811849	Peak25945	1.02189	0.00568623	5.45289	4.08488	5.56244	EO_DC
chr4	125276783	125277183	Peak25968	0.922358	0.0112076	5.68542	4.46669	4.98196	EO_DC
chr4	125406462	125406862	Peak25973	0.764102	0.0111038	6.42222	5.51736	6.08978	EO_DC
chr4	126620134	126620534	Peak26027	0.905417	0.0191678	5.43615	4.16981	4.59577	EO_DC
chr4	126801602	126802002	Peak26037	1.17769	0.000870916	5.76475	4.24973	5.7188	EO_DC
chr4	126815501	126815901	Peak26039	0.806064	0.0387328	5.30452	4.16918	4.90316	EO_DC
chr4	126877416	126877816	Peak26043	0.761269	0.0295293	5.65838	4.68584	5.77339	EO_DC
chr4	127022289	127022689	Peak26056	1.32934	9.4546e-06	6.62373	5.06394	5.99588	EO_DC
chr4	127042669	127043069	Peak26058	0.692162	0.0441575	6.06259	5.19146	5.23828	EO_DC
chr4	129180316	129180716	Peak26113	1.11039	0.000388585	6.35605	5.01956	6.2212	EO_DC
chr4	129779496	129779896	Peak26146	1.40451	2.41986e-06	6.74532	5.10749	5.8349	EO_DC
chr4	129876148	129876548	Peak26151	0.682629	0.0480499	6.0307	5.16981	5.13139	EO_DC
chr4	130174311	130174711	Peak26166	1.01398	0.00726429	5.28341	3.89949	5.74258	EO_DC
chr4	133206043	133206443	Peak26309	0.762468	0.0191481	6.06363	5.12911	5.50516	EO_DC
chr4	134036783	134037183	Peak26364	0.668091	0.0294839	6.21026	5.41603	6.54764	EO_DC
chr4	135702658	135703058	Peak26446	0.656501	0.0299924	6.37159	5.59509	6.16453	EO_DC
chr4	137561797	137562197	Peak26530	1.15601	0.000627246	6.01068	4.56488	5.44382	EO_DC
chr4	138753267	138753667	Peak26577	0.729431	0.0281761	5.82715	4.92443	6.12889	EO_DC
chr4	139197875	139198275	Peak26597	0.848861	0.0120577	5.98882	4.92349	5.1126	EO_DC
chr4	140195935	140196335	Peak26641	1.11791	2.50094e-05	6.75155	5.4842	7.20449	EO_DC
chr4	140721715	140722115	Peak26679	0.834477	0.00228966	6.7533	5.79621	6.42304	EO_DC
chr4	140909759	140910159	Peak26696	0.756293	0.0367935	5.64624	4.65479	5.14863	EO_DC
chr4	141128872	141129272	Peak26714	0.912748	0.00361374	6.07361	4.97179	6.42689	EO_DC
chr4	143902589	143902989	Peak26776	1.10029	0.0135599	4.11227	1.85104	4.5501	EO_DC
chr4	144595988	144596388	Peak26787	1.59814	3.50636e-05	5.86416	3.74346	4.69659	EO_DC
chr4	144809475	144809875	Peak26796	0.982938	0.00377283	6.03373	4.79702	5.16773	EO_DC
chr4	144854601	144855001	Peak26798	1.0333	0.00981404	5.13376	3.62628	4.7188	EO_DC
chr4	144967615	144968015	Peak26803	1.3411	0.000607863	5.48426	3.62628	4.79081	EO_DC
chr4	145713940	145714340	Peak26824	1.01563	0.00860493	5.31938	3.89911	4.91237	EO_DC
chr4	14706487	14706887	Peak26848	0.945112	0.027016	4.77756	3.21186	3.39057	EO_DC
chr4	147359530	147359930	Peak26860	0.672908	0.0381983	6.01253	5.1913	6.18481	EO_DC
chr4	149957804	149958204	Peak27008	1.32565	0.000722617	5.5291	3.68496	4.52831	EO_DC
chr4	151489882	151490282	Peak27066	0.837262	0.0161551	5.83838	4.76934	5.24703	EO_DC
chr4	15170615	15171015	Peak27086	1.54705	2.17569e-07	6.69307	4.90025	6.42217	EO_DC
chr4	16015256	16015656	Peak27239	0.834512	0.0281489	5.64565	4.50075	3.43556	EO_DC
chr4	16641916	16642316	Peak27242	1.09033	0.0100433	4.96615	3.21186	3.33412	EO_DC
chr4	16953789	16954189	Peak27244	0.725133	0.0490104	5.67449	4.7145	4.54577	EO_DC
chr4	18322632	18323032	Peak27248	0.812684	0.00146506	6.9889	6.07563	6.87737	EO_DC
chr4	19058069	19058469	Peak27251	1.05869	0.00648231	5.23061	3.74261	5.65311	EO_DC
chr4	19262486	19262886	Peak27253	0.964663	0.0269034	4.33802	2.62812	4.57041	EO_DC
chr4	21672785	21673185	Peak27274	1.00144	0.0097229	5.30402	3.89873	4.98516	EO_DC
chr4	21681516	21681916	Peak27275	0.985797	0.0136554	5.28493	3.84867	4.08761	EO_DC
chr4	21682454	21682854	Peak27276	1.18766	0.00136782	5.71292	4.12846	4.51184	EO_DC
chr4	21884778	21885178	Peak27285	0.798737	0.041126	5.33802	4.21155	4.04528	EO_DC
chr4	21944973	21945373	Peak27286	0.789294	0.0485961	5.22929	4.08655	3.97962	EO_DC
chr4	22072046	22072446	Peak27290	0.69659	0.0107931	6.8154	6.01921	5.93694	EO_DC
chr4	26645441	26645841	Peak27323	1.17403	0.000190847	6.49936	5.08655	5.11553	EO_DC
chr4	32263415	32263815	Peak27339	1.14927	0.000886668	6.08381	4.6272	4.66206	EO_DC
chr4	33204704	33205104	Peak27364	0.870336	0.0369416	4.92331	3.56512	3.65404	EO_DC
chr4	34681700	34682100	Peak27393	0.847111	0.0439075	4.46788	3.13105	5.62465	EO_DC
chr4	35140065	35140465	Peak27408	1.17566	0.000657471	6.05284	4.5656	4.90316	EO_DC
chr4	35150927	35151327	Peak27409	1.11103	0.00656477	5.22903	3.56272	4.34911	EO_DC
chr4	41038422	41038822	Peak27472	0.855405	0.0294052	5.11628	3.89911	5.07783	EO_DC
chr4	41126893	41127293	Peak27481	1.07907	0.0053096	5.35763	3.84789	5.59674	EO_DC
chr4	43347589	43347989	Peak27525	0.767875	0.0182229	6.24834	5.30646	5.77894	EO_DC
chr4	44486364	44486764	Peak27570	0.892794	0.0198077	5.6708	4.43521	4.31897	EO_DC
chr4	44561907	44562307	Peak27572	0.717083	0.0467916	5.55929	4.62559	5.40976	EO_DC
chr4	46476082	46476482	Peak27635	0.885853	0.0118735	5.82663	4.6854	4.86983	EO_DC
chr4	48589214	48589614	Peak27675	0.891256	0.0324492	4.7544	3.36435	4.86983	EO_DC
chr4	48592384	48592784	Peak27676	0.634369	0.045062	6.14411	5.38165	5.94309	EO_DC
chr4	51881628	51882028	Peak27695	0.843684	0.0270015	5.45131	4.29099	5.06054	EO_DC
chr4	52858199	52858599	Peak27700	1.17463	0.00458313	5.15466	3.36435	3.94234	EO_DC
chr4	53340272	53340672	Peak27709	0.788561	0.037683	5.4037	4.32715	5.20866	EO_DC
chr4	53352087	53352487	Peak27710	0.964201	0.00545934	5.76439	4.53403	5.72787	EO_DC
chr4	53944346	53944746	Peak27726	0.622014	0.0476204	6.29413	5.54917	5.48842	EO_DC
chr4	54945510	54945910	Peak27737	1.13753	0.00406748	5.57425	3.94747	3.76052	EO_DC
chr4	55000237	55000637	Peak27741	0.920421	0.00752778	5.91223	4.74282	5.80042	EO_DC
chr4	55372152	55372552	Peak27757	0.924388	0.0199036	5.28468	3.94968	4.56302	EO_DC
chr4	55490405	55490805	Peak27762	0.719643	0.0270797	5.92233	5.04115	6.36943	EO_DC
chr4	57176229	57176629	Peak27790	1.27636	0.000578841	5.77683	4.08588	4.809	EO_DC
chr4	57191740	57192140	Peak27791	1.29318	0.00155027	5.33655	3.43495	4.00968	EO_DC
chr4	5732120	5732520	Peak27800	1.19227	0.00437672	5.13518	3.28954	3.95546	EO_DC
chr4	57783099	57783499	Peak27810	1.40711	0.000132068	5.82785	3.99569	5.03996	EO_DC
chr4	57847074	57847474	Peak27814	1.17311	0.000709975	5.81513	4.3263	5.85462	EO_DC
chr4	58656216	58656616	Peak27831	1.15746	0.00410052	5.19341	3.50025	4.57892	EO_DC
chr4	59463714	59464114	Peak27854	0.951131	0.0194575	4.98867	3.56416	4.70049	EO_DC
chr4	59732602	59733002	Peak27859	0.950881	0.01282	5.48359	4.1695	4.45079	EO_DC
chr4	61685570	61685970	Peak27878	0.794265	0.0463956	5.0951	3.95005	5.16001	EO_DC
chr4	62205886	62206286	Peak27892	0.884219	0.0314345	5.19232	3.84867	3.58429	EO_DC
chr4	62542785	62543185	Peak27902	0.872307	0.0263991	5.2829	4.04097	4.75951	EO_DC
chr4	63081545	63081945	Peak27914	0.82336	0.0249872	5.42106	4.32686	5.69943	EO_DC
chr4	6520076	6520476	Peak27932	1.60444	2.32443e-06	6.3195	4.36435	5.62875	EO_DC
chr4	6727496	6727896	Peak27946	0.922495	0.0255811	4.85141	3.43495	4.69267	EO_DC
chr4	68474959	68475359	Peak27948	0.928953	0.0297243	4.82873	3.2907	3.73586	EO_DC
chr4	69287716	69288116	Peak27952	0.796589	0.0469825	5.15271	3.99498	4.45079	EO_DC
chr4	69993645	69994045	Peak27957	0.969005	0.00427915	5.81531	4.5965	5.99038	EO_DC
chr4	80520314	80520714	Peak27993	1.18626	0.000168164	6.30264	4.87411	5.81572	EO_DC
chr4	8081727	8082127	Peak27997	1.7559	3.41698e-05	5.71141	3.21063	4.37376	EO_DC
chr4	82265478	82265878	Peak28019	1.17793	0.00200431	5.56139	3.94747	4.83925	EO_DC
chr4	82889984	82890384	Peak28027	1.16126	0.002527	5.45312	3.84828	4.74068	EO_DC
chr4	82975492	82975892	Peak28033	0.776703	0.00221008	7.04204	6.17076	6.65833	EO_DC
chr4	83074740	83075140	Peak28035	0.748535	0.0438844	5.50046	4.50075	5.18454	EO_DC
chr4	83666550	83666950	Peak28045	0.839515	0.035203	5.11485	3.89949	4.58315	EO_DC
chr4	83870434	83870834	Peak28047	1.07631	0.00341876	5.60148	4.17108	5.51346	EO_DC
chr4	84854411	84854811	Peak28066	0.615144	0.043169	6.27657	5.54966	6.28899	EO_DC
chr4	85391491	85391891	Peak28071	0.930184	0.0323252	4.37219	2.74218	4.5251	EO_DC
chr4	86765721	86766121	Peak28100	0.775301	0.0258425	5.88731	4.89873	4.88269	EO_DC
chr4	87118709	87119109	Peak28104	1.1808	0.000309226	6.13433	4.6854	5.74068	EO_DC
chr4	96869686	96870086	Peak28177	1.72269	2.75816e-05	5.67274	3.28954	4.18658	EO_DC
chr4	9697865	9698265	Peak28178	1.12819	0.00196099	5.7386	4.25152	4.89637	EO_DC
chr4	98512374	98512774	Peak28208	0.667035	0.0240527	6.36216	5.58042	6.63914	EO_DC
chr4	98532371	98532771	Peak28210	0.936513	0.0211543	4.89941	3.50125	4.97318	EO_DC
chr4	98866476	98866876	Peak28216	0.925073	0.0193345	5.2285	3.89987	4.75201	EO_DC
chr4	99302669	99303069	Peak28222	0.834914	0.0439833	4.64565	3.3638	5.20792	EO_DC
chr4	99336892	99337292	Peak28227	1.10481	0.00208659	5.84029	4.39874	4.5501	EO_DC
chr5	100472940	100473340	Peak28246	0.713596	0.0103577	6.61703	5.79621	6.41744	EO_DC
chr5	100896301	100896701	Peak28260	1.3985	0.000167799	5.92102	4.08488	4.51184	EO_DC
chr5	10189992	10190392	Peak28276	1.22339	0.00475736	4.67371	2.62628	4.64301	EO_DC
chr5	102276828	102277228	Peak28288	0.937845	0.00511416	5.8275	4.65614	6.00696	EO_DC
chr5	102483879	102484279	Peak28299	1.00673	0.00821181	5.51452	4.12813	4.31016	EO_DC
chr5	102588608	102589008	Peak28305	0.87983	0.038171	4.46877	3.04063	5.13139	EO_DC
chr5	104073224	104073624	Peak28322	1.13246	0.0040463	5.55824	3.94931	3.52391	EO_DC
chr5	104164776	104165176	Peak28328	1.37532	5.75022e-05	6.14467	4.43285	5.29476	EO_DC
chr5	104189393	104189793	Peak28330	1.16544	0.000506228	6.13461	4.6854	5.04304	EO_DC
chr5	104242224	104242624	Peak28333	0.956385	0.00121744	6.73768	5.61216	6.04457	EO_DC
chr5	104284928	104285328	Peak28336	0.996875	0.00541147	5.98773	4.68716	5.23704	EO_DC
chr5	104861893	104862293	Peak28348	0.97366	0.00765928	5.61804	4.32743	4.99473	EO_DC
chr5	104871857	104872257	Peak28350	1.05646	0.00132467	6.22942	4.92537	5.55814	EO_DC
chr5	108505946	108506346	Peak28427	1.05723	0.000311864	6.56721	5.32771	6.30026	EO_DC
chr5	108526604	108527004	Peak28428	0.977092	0.002886	6.20091	4.99516	5.2851	EO_DC
chr5	109501099	109501499	Peak28450	0.821986	0.0389958	5.13518	3.94747	4.52831	EO_DC
chr5	109525439	109525839	Peak28451	1.95635	5.77018e-08	6.42839	4.04063	5.00738	EO_DC
chr5	110866602	110867002	Peak28487	0.702491	0.0350135	5.95492	5.08555	5.77709	EO_DC
chr5	113628226	113628626	Peak28570	0.960361	0.0107154	5.55908	4.25271	5.17896	EO_DC
chr5	114422657	114423057	Peak28618	0.997607	0.00354733	5.88798	4.62651	5.43277	EO_DC
chr5	115653713	115654113	Peak28677	0.901411	0.0157641	5.68408	4.4672	5.25041	EO_DC
chr5	117947063	117947463	Peak28765	0.855923	0.0161313	5.7673	4.65637	5.24168	EO_DC
chr5	119018964	119019364	Peak28799	0.977923	0.0139568	5.21293	3.79764	4.63079	EO_DC
chr5	120029965	120030365	Peak28815	1.64393	0.000197574	5.301	2.73878	4.13139	EO_DC
chr5	121344876	121345276	Peak28859	1.26723	0.00202034	5.09481	3.21063	4.86983	EO_DC
chr5	122344655	122345055	Peak28889	0.844944	0.0333858	5.38827	4.1695	4.67112	EO_DC
chr5	123378398	123378798	Peak28945	0.859099	0.0384198	4.82768	3.50226	4.57041	EO_DC
chr5	126585206	126585606	Peak29075	0.756923	0.041169	5.57446	4.56416	4.56186	EO_DC
chr5	127819246	127819646	Peak29085	1.35398	2.77531e-05	6.29425	4.65614	5.77524	EO_DC
chr5	130267765	130268165	Peak29134	0.906761	0.00499816	6.17375	5.06275	5.4594	EO_DC
chr5	130656268	130656668	Peak29156	1.14611	0.00121871	6.01022	4.53158	4.82956	EO_DC
chr5	131570609	131571009	Peak29167	0.796444	0.0338049	5.54395	4.46669	4.9924	EO_DC
chr5	132039669	132040069	Peak29178	0.902494	0.00627667	6.04196	4.92406	5.66352	EO_DC
chr5	135417703	135418103	Peak29231	0.740012	0.0311193	6.06274	5.12943	5.34481	EO_DC
chr5	13694760	13695160	Peak29313	0.810632	0.0234423	5.73972	4.68473	4.78347	EO_DC
chr5	137256424	137256824	Peak29322	0.867667	0.0235189	5.37147	4.17076	4.56186	EO_DC
chr5	138604263	138604663	Peak29385	0.742827	0.0238173	6.04332	5.12813	5.49906	EO_DC
chr5	139768049	139768449	Peak29410	0.811293	0.0257506	5.60312	4.53403	5.20992	EO_DC
chr5	139801446	139801846	Peak29412	0.788069	0.00131675	7.0274	6.15032	6.98159	EO_DC
chr5	140544476	140544876	Peak29447	0.839023	0.0138238	5.82646	4.76955	5.75338	EO_DC
chr5	142927744	142928144	Peak29495	0.685895	0.0249913	6.37966	5.56368	5.99473	EO_DC
chr5	143544351	143544751	Peak29513	0.667116	0.0184215	6.48393	5.71353	6.58996	EO_DC
chr5	144090427	144090827	Peak29547	0.868892	0.0230644	5.37076	4.17044	4.6267	EO_DC
chr5	144328589	144328989	Peak29560	1.03067	0.00662424	5.74046	4.32601	4.22501	EO_DC
chr5	145024356	145024756	Peak29580	0.955507	0.0126975	5.32112	3.99641	5.08083	EO_DC
chr5	145270340	145270740	Peak29590	1.08175	0.00351425	5.66053	4.21308	5.42163	EO_DC
chr5	146718448	146718848	Peak29621	1.07267	0.00625738	5.31988	3.79805	5.06578	EO_DC
chr5	148105669	148106069	Peak29655	0.858729	0.015327	5.85296	4.74218	4.49845	EO_DC
chr5	148659863	148660263	Peak29672	1.01871	0.00270435	6.10573	4.82378	4.82599	EO_DC
chr5	149377246	149377646	Peak29699	0.900376	0.0371722	4.75109	3.21124	3.8717	EO_DC
chr5	149806335	149806735	Peak29716	0.812641	0.0335777	5.371	4.25122	4.60717	EO_DC
chr5	150073274	150073674	Peak29727	1.08644	0.00509901	5.42083	3.89987	4.46338	EO_DC
chr5	150178462	150178862	Peak29734	0.757183	0.0434123	5.45312	4.43285	5.07564	EO_DC
chr5	150327019	150327419	Peak29739	1.0209	0.00251689	6.22982	4.94931	4.8198	EO_DC
chr5	151298410	151298810	Peak29763	0.817692	0.0322752	5.45221	4.32601	4.55872	EO_DC
chr5	16474607	16475007	Peak29790	0.923919	0.000368803	7.12877	6.08563	5.87156	EO_DC
chr5	17588038	17588438	Peak29792	1.36268	1.61414e-05	6.53006	4.8993	5.17896	EO_DC
chr5	17589633	17590033	Peak29793	1.23823	0.000808023	5.58886	3.94821	5.44149	EO_DC
chr5	18660314	18660714	Peak29802	0.71523	0.0430246	5.7924	4.87373	5.90868	EO_DC
chr5	21179011	21179411	Peak29840	0.98994	0.00584416	5.82838	4.53354	4.73791	EO_DC
chr5	21297925	21298325	Peak29847	0.936985	0.00646051	5.81584	4.62582	5.47482	EO_DC
chr5	22211844	22212244	Peak29855	1.13886	0.00453386	5.28315	3.62628	4.45079	EO_DC
chr5	22907142	22907542	Peak29860	1.26635	0.00193849	5.30201	3.4318	4.35769	EO_DC
chr5	22913717	22914117	Peak29861	0.85268	0.0236158	5.371	4.21063	5.29803	EO_DC
chr5	23425671	23426071	Peak29873	0.991676	0.0170876	4.75367	3.21124	4.9764	EO_DC
chr5	25042777	25043177	Peak29937	0.798281	0.0284669	5.73768	4.6854	5.16849	EO_DC
chr5	26948718	26949118	Peak29951	0.935414	0.0249913	4.82803	3.36325	4.27013	EO_DC
chr5	30137909	30138309	Peak30000	0.745397	0.0273817	5.6741	4.74112	6.51627	EO_DC
chr5	34935919	34936319	Peak30143	0.888094	0.0207849	5.22903	3.99676	5.5973	EO_DC
chr5	35311069	35311469	Peak30154	0.757961	0.0365538	5.58968	4.59556	5.06054	EO_DC
chr5	3577967	3578367	Peak30168	0.958447	0.00950129	5.57259	4.28954	5.14578	EO_DC
chr5	36060576	36060976	Peak30182	0.897828	0.00194993	6.32025	5.27051	6.95555	EO_DC
chr5	36376577	36376977	Peak30195	0.914807	0.0168586	5.4366	4.17044	4.48946	EO_DC
chr5	37293995	37294395	Peak30217	1.1079	0.00426613	5.58927	4.04028	3.41927	EO_DC
chr5	38945177	38945577	Peak30256	0.857171	0.0248028	5.2674	4.08454	5.3791	EO_DC
chr5	38971917	38972317	Peak30259	0.969701	0.00264512	6.13489	4.94784	5.74119	EO_DC
chr5	42135514	42135914	Peak30273	0.813369	0.0286301	5.55908	4.46823	4.67691	EO_DC
chr5	44251952	44252352	Peak30288	1.04996	0.00426238	5.86314	4.46617	5.40628	EO_DC
chr5	44260151	44260551	Peak30289	0.996786	0.000546581	6.67997	5.51736	5.47709	EO_DC
chr5	45886836	45887236	Peak30302	0.814092	0.00658202	6.36228	5.39995	6.48812	EO_DC
chr5	50514072	50514472	Peak30320	0.921915	0.00178269	6.48393	5.3986	5.84983	EO_DC
chr5	53035785	53036185	Peak30332	1.55881	0.000186018	5.4672	3.21002	4.27013	EO_DC
chr5	53858109	53858509	Peak30345	1.03316	0.0003903	6.45961	5.25062	6.82623	EO_DC
chr5	5494403	5494803	Peak30359	1.02165	0.0112769	5.19205	3.68628	4.25429	EO_DC
chr5	5684958	5685358	Peak30374	0.819401	0.0466415	5.1907	3.94931	3.79348	EO_DC
chr5	61273744	61274144	Peak30383	1.07442	0.000305363	6.53708	5.27065	6.32633	EO_DC
chr5	63957081	63957481	Peak30388	1.7738	3.73495e-06	5.79186	3.50025	6.08531	EO_DC
chr5	64321996	64322396	Peak30394	1.41084	0.000210152	5.51496	3.62628	5.89591	EO_DC
chr5	64499090	64499490	Peak30404	0.986383	0.0211695	4.587	2.94637	4.94234	EO_DC
chr5	64891683	64892083	Peak30414	0.867867	0.0185162	5.65779	4.5	4.66206	EO_DC
chr5	66358401	66358801	Peak30462	1.03242	0.00928036	5.28544	3.79478	4.37732	EO_DC
chr5	66542680	66543080	Peak30466	0.907273	0.00370109	6.54364	5.45013	5.01824	EO_DC
chr5	68686982	68687382	Peak30517	0.859167	0.0238695	5.46967	4.28925	4.6102	EO_DC
chr5	69880324	69880724	Peak30519	0.870823	0.0111248	5.97761	4.87547	5.20792	EO_DC
chr5	72856062	72856462	Peak30535	1.09981	0.000186018	6.55992	5.26918	6.15395	EO_DC
chr5	73293537	73293937	Peak30546	0.76389	0.00678453	6.62504	5.7408	6.43714	EO_DC
chr5	73610977	73611377	Peak30556	0.780313	0.0493544	4.96647	3.84907	5.55657	EO_DC
chr5	73760156	73760556	Peak30563	0.975622	0.0219642	4.96456	3.36435	4.41581	EO_DC
chr5	73810423	73810823	Peak30566	0.776518	0.0153926	6.11585	5.17013	5.72978	EO_DC
chr5	75463096	75463496	Peak30602	0.717141	0.0209809	6.2579	5.39887	5.65202	EO_DC
chr5	75606010	75606410	Peak30608	0.909522	0.0196004	5.23246	3.94784	5.26031	EO_DC
chr5	76532814	76533214	Peak30618	0.855246	0.0240495	5.42175	4.25092	4.86382	EO_DC
chr5	76714663	76715063	Peak30622	0.881482	0.00809247	6.02088	4.92462	5.56244	EO_DC
chr5	76750502	76750902	Peak30624	0.621237	0.00895943	7.20206	6.51724	7.03652	EO_DC
chr5	77675023	77675423	Peak30647	0.921465	0.0272129	4.87578	3.4339	4.38087	EO_DC
chr5	81758702	81759102	Peak30659	0.847815	0.0348609	5.28341	4.04304	4.44954	EO_DC
chr5	82682699	82683099	Peak30667	0.965327	0.00616049	5.64446	4.40008	6.00064	EO_DC
chr5	8660145	8660545	Peak30682	0.854374	0.0223286	5.58762	4.43285	4.8524	EO_DC
chr5	89108348	89108748	Peak30703	0.902499	0.00526977	6.19178	5.08622	5.44382	EO_DC
chr5	9006551	9006951	Peak30713	1.0956	0.00436639	5.55908	4.04097	4.1256	EO_DC
chr5	90674433	90674833	Peak30719	1.21344	0.0040226	4.94295	3.04063	4.81261	EO_DC
chr5	90675511	90675911	Peak30720	1.23191	0.00125417	5.63061	3.94968	4.90562	EO_DC
chr5	93227018	93227418	Peak30768	0.8408	0.0279197	5.55908	4.3982	4.13296	EO_DC
chr5	97277054	97277454	Peak30798	1.68455	4.63422e-05	5.72451	3.36214	3.82242	EO_DC
chr5	97519106	97519506	Peak30802	1.34355	0.000653658	5.61764	3.74091	3.7303	EO_DC
chr5	9755740	9756140	Peak30805	1.72546	2.03921e-05	5.71387	3.3627	4.78814	EO_DC
chr6	100220742	100221142	Peak30832	0.923888	0.0103681	5.5755	4.36214	5.63488	EO_DC
chr6	100448689	100449089	Peak30849	1.11734	7.93813e-05	6.63795	5.34559	6.60064	EO_DC
chr6	100595762	100596162	Peak30853	0.752724	0.0297142	5.75128	4.796	5.72648	EO_DC
chr6	101222288	101222688	Peak30859	1.41026	0.000564615	5.40347	3.3627	4.27537	EO_DC
chr6	102696563	102696963	Peak30866	0.934299	0.0188863	5.3	3.946	5.1726	EO_DC
chr6	104934135	104934535	Peak30872	1.43464	0.000280542	5.72582	3.74049	3.5501	EO_DC
chr6	10519628	10520028	Peak30873	1.88013	1.75205e-06	6.23858	3.79845	3.52391	EO_DC
chr6	106613850	106614250	Peak30876	0.99701	0.0098101	5.64545	4.25331	4.36262	EO_DC
chr6	108407643	108408043	Peak30893	1.04371	0.00535115	5.49914	4.08555	4.95131	EO_DC
chr6	112988307	112988707	Peak30937	0.946104	0.00803371	5.7001	4.46848	5.34911	EO_DC
chr6	116589883	116590283	Peak31043	1.32309	0.00144709	5.11656	3.12911	4.81524	EO_DC
chr6	117030732	117031132	Peak31047	1.02508	0.0151292	4.85073	3.21124	4.34777	EO_DC
chr6	117882668	117883068	Peak31061	0.695262	0.0450771	5.87527	4.99445	5.64908	EO_DC
chr6	117887199	117887599	Peak31062	1.01646	0.0120641	5.13546	3.6272	4.32404	EO_DC
chr6	118720324	118720724	Peak31079	0.950657	0.0252836	4.50133	2.95078	5.33914	EO_DC
chr6	119399125	119399525	Peak31095	0.635976	0.0496731	6.25738	5.48471	4.83571	EO_DC
chr6	12076639	12077039	Peak31135	1.2507	0.0013449	5.4847	3.74091	4.8286	EO_DC
chr6	121476118	121476518	Peak31162	0.903035	0.0279979	4.87341	3.50025	5.02759	EO_DC
chr6	122720367	122720767	Peak31194	0.842775	0.00857392	5.99933	4.97179	6.26355	EO_DC
chr6	122729957	122730357	Peak31195	1.02062	0.0120969	5.32062	3.79437	3.16979	EO_DC
chr6	123743634	123744034	Peak31207	0.727501	0.0472157	5.64466	4.68562	4.53706	EO_DC
chr6	124424545	124424945	Peak31216	0.706358	0.0400626	5.88596	4.99587	5.61339	EO_DC
chr6	124492188	124492588	Peak31219	0.782173	0.032733	5.63101	4.59603	4.78814	EO_DC
chr6	125361158	125361558	Peak31276	1.03896	0.00122371	6.19165	4.92387	5.86683	EO_DC
chr6	125383704	125384104	Peak31281	0.667499	0.00494107	7.01625	6.27983	7.48432	EO_DC
chr6	125542045	125542445	Peak31289	0.993156	0.00541985	5.72657	4.4318	5.66806	EO_DC
chr6	127029959	127030359	Peak31307	1.00489	0.000996376	6.50598	5.30775	5.5201	EO_DC
chr6	127044524	127044924	Peak31309	0.79315	0.0328737	5.53103	4.46694	4.80538	EO_DC
chr6	127053551	127053951	Peak31310	1.3276	0.00104821	5.35181	3.4318	5.19968	EO_DC
chr6	127080403	127080803	Peak31312	0.784346	0.0339939	5.67371	4.62697	4.46462	EO_DC
chr6	128230624	128231024	Peak31352	0.977826	0.00553019	5.82611	4.56488	5.18658	EO_DC
chr6	128246398	128246798	Peak31355	0.874463	0.0169548	5.72563	4.56464	4.00968	EO_DC
chr6	129373663	129374063	Peak31387	0.840017	0.0181169	5.80337	4.71493	5.11844	EO_DC
chr6	131559975	131560375	Peak31398	0.718308	0.00784816	6.80319	5.98433	6.14721	EO_DC
chr6	133913293	133913693	Peak31407	0.923924	0.00428071	6.17307	5.0408	5.51627	EO_DC
chr6	133937146	133937546	Peak31408	0.900062	0.00421195	6.45142	5.36435	5.68535	EO_DC
chr6	134172391	134172791	Peak31413	0.812213	0.0374874	5.23061	4.08588	4.92486	EO_DC
chr6	134754948	134755348	Peak31432	1.1433	0.00313522	5.38709	3.79518	5.01908	EO_DC
chr6	134813170	134813570	Peak31435	0.716623	0.0330047	5.99979	5.10799	5.12928	EO_DC
chr6	137363056	137363456	Peak31504	0.822252	0.0251601	5.55992	4.4672	4.82599	EO_DC
chr6	137617955	137618355	Peak31513	0.939829	0.000797935	6.48459	5.39806	7.06509	EO_DC
chr6	139473962	139474362	Peak31526	1.07053	0.00449292	5.35496	3.89835	5.57041	EO_DC
chr6	140393493	140393893	Peak31539	0.736748	0.0262669	6.25647	5.34587	4.99704	EO_DC
chr6	140467862	140468262	Peak31545	0.740896	0.0373773	5.69914	4.74218	5.15641	EO_DC
chr6	140525629	140526029	Peak31549	0.879865	0.0189049	5.403	4.21186	5.75063	EO_DC
chr6	140557120	140557520	Peak31551	0.770275	0.036055	5.4206	4.39981	5.70049	EO_DC
chr6	142913459	142913859	Peak31584	0.610958	0.0359675	6.50718	5.79662	5.96833	EO_DC
chr6	142934891	142935291	Peak31585	1.65416	4.32544e-06	6.11556	4.03994	5.68732	EO_DC
chr6	143909017	143909417	Peak31604	0.948146	0.0305182	4.22823	2.50025	4.75475	EO_DC
chr6	144309809	144310209	Peak31608	1.07242	0.000489337	6.55101	5.26918	5.58469	EO_DC
chr6	144950010	144950410	Peak31619	1.0799	0.00740732	5.15299	3.56272	5.07182	EO_DC
chr6	145024395	145024795	Peak31623	0.675587	0.0129163	6.7781	6.00759	6.37399	EO_DC
chr6	145042900	145043300	Peak31625	0.908717	0.0111642	5.75072	4.56536	5.21612	EO_DC
chr6	145124812	145125212	Peak31630	0.933153	0.00256897	6.37016	5.25018	5.95784	EO_DC
chr6	148353001	148353401	Peak31679	1.12917	0.00480527	5.26688	3.62766	4.44615	EO_DC
chr6	15693315	15693715	Peak31710	0.823432	0.0416825	5.11399	3.90139	4.80802	EO_DC
chr6	18435087	18435487	Peak31727	1.97194	1.462e-07	6.40312	3.94747	3.96022	EO_DC
chr6	22072106	22072506	Peak31738	0.873278	0.0295782	5.07538	3.796	4.54577	EO_DC
chr6	22389811	22390211	Peak31741	0.882077	0.0313702	4.89808	3.56368	4.76968	EO_DC
chr6	23030253	23030653	Peak31746	0.897303	0.0273685	4.96805	3.62674	4.8524	EO_DC
chr6	24572079	24572479	Peak31769	1.11618	0.00429762	5.36956	3.796	4.85684	EO_DC
chr6	24728972	24729372	Peak31771	1.89165	3.94664e-05	5.45063	2.50125	3.08002	EO_DC
chr6	25751230	25751630	Peak31778	0.889484	0.0180131	5.4206	4.21155	4.95458	EO_DC
chr6	26726739	26727139	Peak31782	1.17564	0.000369078	6.13518	4.68518	5.55971	EO_DC
chr6	28475538	28475938	Peak31790	1.05585	0.00788181	5.32037	3.79518	4.0514	EO_DC
chr6	29078247	29078647	Peak31806	1.15642	0.0064456	4.80212	2.94858	4.7918	EO_DC
chr6	32918917	32919317	Peak31909	0.873892	0.0380915	4.82628	3.43285	3.87674	EO_DC
chr6	33820671	33821071	Peak31917	0.993264	0.00660155	5.64446	4.32686	4.9291	EO_DC
chr6	34816786	34817186	Peak31946	0.756554	0.0426133	5.51474	4.49925	5.05445	EO_DC
chr6	37100033	37100433	Peak31973	0.774051	0.0266207	5.8628	4.87431	5.04528	EO_DC
chr6	37775391	37775791	Peak31995	1.62468	4.17597e-06	6.10443	4.08488	5.76596	EO_DC
chr6	37787035	37787435	Peak31996	1.19134	0.00425988	4.77864	2.94637	5.59464	EO_DC
chr6	37807336	37807736	Peak31997	0.785863	0.0430875	5.38851	4.29041	4.23435	EO_DC
chr6	3825793	3826193	Peak32009	0.697502	0.0169588	6.39566	5.58113	6.52861	EO_DC
chr6	44154449	44154849	Peak32080	1.77006	2.77832e-05	5.54608	3.03994	4.86382	EO_DC
chr6	47138132	47138532	Peak32097	0.937523	0.0134656	5.37028	4.08421	5.75063	EO_DC
chr6	52772617	52773017	Peak32234	0.787855	0.0446578	5.15605	4.04201	5.24631	EO_DC
chr6	54914750	54915150	Peak32281	1.27815	0.00109511	5.63161	3.8471	3.76596	EO_DC
chr6	5526867	5527267	Peak32290	0.701665	0.048533	5.82803	4.92499	4.69659	EO_DC
chr6	55741880	55742280	Peak32298	0.681281	0.0107931	6.88164	6.1084	6.49876	EO_DC
chr6	56242120	56242520	Peak32300	1.57961	0.00018048	5.35472	3.04132	4.61959	EO_DC
chr6	5657874	5658274	Peak32303	0.680057	0.0316671	6.183	5.36283	6.17233	EO_DC
chr6	58248480	58248880	Peak32320	1.08378	0.0021684	5.89924	4.5	4.63079	EO_DC
chr6	59145780	59146180	Peak32327	0.919077	0.0312478	4.64446	3.12911	4.32034	EO_DC
chr6	60569515	60569915	Peak32339	1.06865	0.00403123	5.64605	4.21124	4.58315	EO_DC
chr6	60592338	60592738	Peak32340	0.957165	0.0097154	5.573	4.28983	5.04611	EO_DC
chr6	60596946	60597346	Peak32341	1.01419	0.00242443	5.92167	4.65727	6.28415	EO_DC
chr6	6148064	6148464	Peak32351	1.17652	0.00354964	5.15216	3.43285	5.22625	EO_DC
chr6	63078738	63079138	Peak32354	1.30066	0.000452112	6.00899	4.28954	3.71495	EO_DC
chr6	64602664	64603064	Peak32356	1.07585	0.0120864	4.82663	3.03994	3.80077	EO_DC
chr6	65011049	65011449	Peak32371	0.619638	0.0298159	6.7573	6.04175	6.15434	EO_DC
chr6	65220661	65221061	Peak32373	0.896139	0.0169451	5.38685	4.17171	5.41214	EO_DC
chr6	65546909	65547309	Peak32376	1.40017	7.92356e-05	6.10573	4.32573	4.66606	EO_DC
chr6	66860918	66861318	Peak32385	0.874562	0.016347	5.58968	4.43364	4.99473	EO_DC
chr6	70038078	70038478	Peak32422	0.979311	0.00232843	6.19232	4.99569	5.45248	EO_DC
chr6	70871687	70872087	Peak32433	0.774164	0.0280206	5.9436	4.94913	4.53269	EO_DC
chr6	71217443	71217843	Peak32447	1.04256	0.00587608	5.42106	3.99605	5.60981	EO_DC
chr6	71786837	71787237	Peak32461	1.01517	0.00937508	5.33655	3.89911	5.01993	EO_DC
chr6	72708304	72708704	Peak32505	0.807161	0.0275807	5.46877	4.39874	5.27989	EO_DC
chr6	7392288	7392688	Peak32526	0.89847	0.0147945	5.76439	4.56488	4.66315	EO_DC
chr6	7702903	7703303	Peak32533	0.718154	0.0442691	5.7498	4.82218	5.67943	EO_DC
chr6	81026575	81026975	Peak32542	0.84345	0.0190501	5.60454	4.5015	5.49906	EO_DC
chr6	82563168	82563568	Peak32559	1.45548	9.12934e-05	5.80248	3.89911	5.12638	EO_DC
chr6	82673351	82673751	Peak32564	0.810001	0.0179112	5.76439	4.74197	5.75713	EO_DC
chr6	83647895	83648295	Peak32611	0.799191	0.0177711	5.89974	4.89968	5.56458	EO_DC
chr6	83788004	83788404	Peak32618	0.852995	0.0363501	4.7772	3.50175	5.34413	EO_DC
chr6	87495590	87495990	Peak32721	0.785237	0.0316237	5.6023	4.5656	5.15072	EO_DC
chr6	87962606	87963006	Peak32736	0.915949	0.0211504	5.17252	3.84828	4.60717	EO_DC
chr6	88433023	88433423	Peak32754	0.785175	0.0181389	5.92249	4.94858	6.03153	EO_DC
chr6	90458235	90458635	Peak32801	0.993174	0.00287649	5.97761	4.74091	5.88019	EO_DC
chr6	91651180	91651580	Peak32835	1.04462	5.99022e-05	6.98859	5.80885	6.69437	EO_DC
chr6	92445516	92445916	Peak32858	1.4251	1.08175e-05	6.34493	4.62536	6.05445	EO_DC
chr6	93929234	93929634	Peak32881	0.899828	0.0168598	5.35327	4.12878	5.30248	EO_DC
chr6	94705428	94705828	Peak32897	0.799694	0.017504	5.92331	4.92237	6.0964	EO_DC
chr6	95059937	95060337	Peak32903	1.22498	0.00247564	5.15466	3.3638	4.95784	EO_DC
chr6	9643626	9644026	Peak32912	0.956976	0.0140118	5.43477	4.08454	4.57892	EO_DC
chr6	97228167	97228567	Peak32926	0.612396	0.0324908	6.64476	5.93674	5.95903	EO_DC
chr6	97906659	97907059	Peak32938	0.779579	0.0466492	5.09539	3.99534	5.27799	EO_DC
chr6	98906398	98906798	Peak32942	0.842133	0.0376197	4.99023	3.74303	4.9282	EO_DC
chr6	99665063	99665463	Peak32965	1.06415	0.00555939	5.56097	4.08622	4.27919	EO_DC
chr7	101793340	101793740	Peak32978	1.26143	0.00155481	5.5448	3.74346	3.53269	EO_DC
chr7	103139894	103140294	Peak32982	0.790591	0.0452778	5.21267	4.08588	4.33412	EO_DC
chr7	103390784	103391184	Peak32992	0.941477	0.0224678	4.94392	3.50276	4.84021	EO_DC
chr7	107650674	107651074	Peak33120	0.753358	0.032962	5.43638	4.46746	6.24933	EO_DC
chr7	108832880	108833280	Peak33171	0.748237	0.0329865	5.69972	4.74197	5.36082	EO_DC
chr7	109285999	109286399	Peak33192	0.83608	0.0317083	5.3878	4.21247	4.2844	EO_DC
chr7	115805850	115806250	Peak33268	1.40745	0.000529043	5.45153	3.43232	4.43214	EO_DC
chr7	119924345	119924745	Peak33359	0.950432	0.0089117	5.61844	4.36297	5.10967	EO_DC
chr7	123366221	123366621	Peak33432	0.796278	0.0286572	5.64545	4.59673	5.05528	EO_DC
chr7	123430297	123430697	Peak33435	1.34361	3.46042e-06	6.72648	5.17155	6.32092	EO_DC
chr7	125755425	125755825	Peak33475	1.03464	0.00963125	5.35569	3.84828	3.94056	EO_DC
chr7	127469429	127469829	Peak33508	0.755565	0.0384242	5.52781	4.5328	5.64449	EO_DC
chr7	127871194	127871594	Peak33516	0.843736	0.0388675	5.11485	3.84907	3.9843	EO_DC
chr7	129106103	129106503	Peak33537	1.23794	0.000513946	5.92134	4.32658	4.96022	EO_DC
chr7	130479750	130480150	Peak33569	1.99043	2.3123e-08	6.40464	3.99676	5.66552	EO_DC
chr7	130488535	130488935	Peak33570	0.967732	0.0235878	4.64525	3.04063	4.23973	EO_DC
chr7	133535652	133536052	Peak33604	1.47707	0.000280253	5.38851	3.28779	5.02532	EO_DC
chr7	133898404	133898804	Peak33624	0.756469	0.0216895	6.10357	5.1706	5.4531	EO_DC
chr7	134368746	134369146	Peak33659	1.43982	3.34704e-05	6.1259	4.32545	5.50516	EO_DC
chr7	137743992	137744392	Peak33775	1.24335	0.000777562	5.64347	3.99676	5.79447	EO_DC
chr7	138125900	138126300	Peak33793	1.19978	0.000172011	6.27529	4.82278	5.8703	EO_DC
chr7	13883004	13883404	Peak33807	1.74381	1.32249e-07	6.47743	4.39847	5.90777	EO_DC
chr7	138847806	138848206	Peak33808	0.961544	0.0114497	5.68639	4.3649	3.54142	EO_DC
chr7	140768541	140768941	Peak33845	0.941467	0.0153376	5.31888	3.99534	4.66606	EO_DC
chr7	141464077	141464477	Peak33861	1.11766	0.00124499	6.13489	4.71493	4.55872	EO_DC
chr7	141963124	141963524	Peak33868	0.794698	0.0409105	5.15411	4.04166	5.10673	EO_DC
chr7	142257023	142257423	Peak33871	0.865871	0.029772	5.15383	3.89873	4.46338	EO_DC
chr7	142330883	142331283	Peak33872	1.20585	0.00104412	5.76493	4.1695	5.62781	EO_DC
chr7	142356970	142357370	Peak33873	0.724327	0.0399416	5.85399	4.92499	5.44784	EO_DC
chr7	142602085	142602485	Peak33874	0.732863	0.0429437	5.69972	4.7424	4.60717	EO_DC
chr7	14596004	14596404	Peak33911	1.12262	0.0024944	5.63281	4.12943	5.04917	EO_DC
chr7	148014517	148014917	Peak33973	0.890362	0.0145556	5.64525	4.46823	4.76596	EO_DC
chr7	148094454	148094854	Peak33981	0.869228	0.0017377	6.77062	5.76976	6.20143	EO_DC
chr7	148159542	148159942	Peak33986	0.783959	0.029416	5.58886	4.5656	5.42979	EO_DC
chr7	148559503	148559903	Peak34014	0.97331	0.0105177	5.59092	4.25092	4.39187	EO_DC
chr7	150474951	150475351	Peak34070	0.99265	0.00822406	5.71179	4.3638	4.50414	EO_DC
chr7	151601635	151602035	Peak34107	0.78667	0.0304732	5.63061	4.59556	5.22428	EO_DC
chr7	152007836	152008236	Peak34118	0.997749	0.00427799	6.02012	4.74197	4.70049	EO_DC
chr7	152324927	152325327	Peak34136	0.670913	0.00973595	6.73972	5.9837	7.00696	EO_DC
chr7	16479553	16479953	Peak34146	1.03971	0.0067237	5.43775	3.99712	4.91908	EO_DC
chr7	25063810	25064210	Peak34341	1.33647	0.000923407	5.66112	3.74091	3.91754	EO_DC
chr7	26194267	26194667	Peak34420	1.32336	0.0013103	5.24782	3.28838	4.55325	EO_DC
chr7	28434742	28435142	Peak34494	0.813254	0.0120943	6.12533	5.12878	5.71932	EO_DC
chr7	29083838	29084238	Peak34523	0.667722	0.0452311	6.13362	5.30947	5.6941	EO_DC
chr7	31613883	31614283	Peak34695	1.86171	5.68714e-06	6.0133	3.50276	3.81524	EO_DC
chr7	3201253	3201653	Peak34718	1.1302	8.7828e-06	7.08925	5.82218	6.71521	EO_DC
chr7	3221809	3222209	Peak34723	0.659578	0.0321598	6.18464	5.39901	6.32691	EO_DC
chr7	3280240	3280640	Peak34725	0.833552	0.0409695	4.98867	3.74346	4.69659	EO_DC
chr7	3522219	3522619	Peak34750	0.841763	0.0250949	5.46922	4.32715	4.9282	EO_DC
chr7	36136179	36136579	Peak34793	1.92042	1.76556e-05	5.57238	2.73878	4.26487	EO_DC
chr7	4852727	4853127	Peak34917	0.79075	0.014406	6.07449	5.10799	5.69801	EO_DC
chr7	48929715	48930115	Peak34930	0.833221	0.015027	5.87612	4.82218	5.18936	EO_DC
chr7	50803004	50803404	Peak34978	0.669784	0.0494273	5.92347	5.08488	5.87893	EO_DC
chr7	56933895	56934295	Peak35198	0.947916	0.0152179	5.33679	3.99569	5.17692	EO_DC
chr7	59419262	59419662	Peak35219	0.693327	0.0354246	6.06467	5.2114	5.83004	EO_DC
chr7	59425464	59425864	Peak35220	1.72579	9.43572e-07	6.294	4.17139	5.17055	EO_DC
chr7	61900688	61901088	Peak35231	0.863455	0.017504	5.76512	4.62582	4.66098	EO_DC
chr7	63242046	63242446	Peak35250	1.18159	0.00187285	5.56097	3.94931	4.91573	EO_DC
chr7	64431364	64431764	Peak35263	1.12259	0.00018885	6.61673	5.28997	5.47937	EO_DC
chr7	65214258	65214658	Peak35270	0.74702	0.0289961	5.78971	4.84927	5.71302	EO_DC
chr7	6951614	6952014	Peak35295	0.767847	0.033867	5.63261	4.62628	5.04834	EO_DC
chr7	71984700	71985100	Peak35346	0.656553	0.00961856	7.08983	6.35507	6.5201	EO_DC
chr7	73018414	73018814	Peak35366	0.963688	2.73573e-05	7.42112	6.3629	6.56934	EO_DC
chr7	73636386	73636786	Peak35375	1.07031	0.00930301	5.1926	3.56464	3.44489	EO_DC
chr7	74867011	74867411	Peak35389	1.02198	0.00337354	5.93349	4.62559	4.9611	EO_DC
chr7	75309805	75310205	Peak35398	0.902852	0.0250915	5.37387	4.0427	3.47254	EO_DC
chr7	75420748	75421148	Peak35401	0.760664	0.0252726	6.08483	5.13008	4.76596	EO_DC
chr7	77384063	77384463	Peak35406	1.35344	3.26076e-05	6.23976	4.59556	5.89342	EO_DC
chr7	78601296	78601696	Peak35420	0.950986	0.015631	5.15327	3.79559	5.11473	EO_DC
chr7	80679974	80680374	Peak35444	0.768699	0.0308032	5.55929	4.5644	5.70967	EO_DC
chr7	84883689	84884089	Peak35478	1.60512	1.12763e-05	6.08513	4.04201	4.75201	EO_DC
chr7	86063531	86063931	Peak35489	0.943497	0.00805296	5.91239	4.68584	4.52391	EO_DC
chr7	86799411	86799811	Peak35522	1.32631	0.000129352	5.957	4.28925	5.7646	EO_DC
chr7	87025838	87026238	Peak35540	0.918745	0.0184215	5.33875	4.04097	4.4002	EO_DC
chr7	87635946	87636346	Peak35573	0.876731	0.0168014	5.698	4.53403	4.97962	EO_DC
chr7	87644056	87644456	Peak35574	0.975492	0.00865674	5.60209	4.2907	5.0666	EO_DC
chr7	88208184	88208584	Peak35599	1.12902	0.00038276	6.47576	5.10815	6.11884	EO_DC
chr7	91051251	91051651	Peak35664	0.903447	0.0061804	6.04302	4.92424	5.35093	EO_DC
chr7	91149764	91150164	Peak35666	1.25877	0.00288183	5.09539	3.12976	4.25573	EO_DC
chr7	91171963	91172363	Peak35667	0.832201	0.0416376	4.87273	3.6272	5.37244	EO_DC
chr7	91396619	91397019	Peak35671	1.49158	4.00594e-06	6.55918	4.76851	4.98196	EO_DC
chr7	91799669	91800069	Peak35679	1.18018	0.00360945	5.3005	3.56464	4.28959	EO_DC
chr7	95278608	95279008	Peak35691	1.0868	0.00163288	6.22876	4.84946	4.35902	EO_DC
chr7	97124123	97124523	Peak35709	0.924928	0.00521362	6.0221	4.87411	5.41452	EO_DC
chr8	10007246	10007646	Peak35735	0.907336	0.00584068	6.16362	5.04166	5.11844	EO_DC
chr8	101039185	101039585	Peak35736	0.855371	0.0138965	6.06497	4.97269	4.90407	EO_DC
chr8	103411420	103411820	Peak35748	1.5589	0.000356115	5.28442	2.85025	3.09195	EO_DC
chr8	103464849	103465249	Peak35751	1.4432	0.000261883	5.7386	3.74261	4.17692	EO_DC
chr8	106397629	106398029	Peak35760	0.758172	0.0389055	5.65995	4.65592	4.55872	EO_DC
chr8	107666251	107666651	Peak35801	0.780074	0.0326228	5.68465	4.65524	5.00107	EO_DC
chr8	107956035	107956435	Peak35824	1.06835	0.00257945	5.81513	4.43285	5.03688	EO_DC
chr8	109228878	109229278	Peak35917	0.811489	0.0411388	5.33949	4.17171	4.24363	EO_DC
chr8	109343447	109343847	Peak35920	0.889017	0.0248956	5.32211	4.04063	4.35902	EO_DC
chr8	109786038	109786438	Peak35944	0.812493	0.00521361	6.5465	5.59532	6.35959	EO_DC
chr8	110043732	110044132	Peak35956	0.637723	0.0492814	5.96694	5.19192	6.26619	EO_DC
chr8	111059181	111059581	Peak35973	0.896208	0.0136852	5.54629	4.36297	5.40499	EO_DC
chr8	112075546	112075946	Peak36006	0.790584	0.0140408	6.11428	5.14976	5.71161	EO_DC
chr8	113278659	113279059	Peak36046	0.780751	0.0115968	6.43557	5.50075	5.18658	EO_DC
chr8	114112169	114112569	Peak36083	0.906259	0.0122729	5.72582	4.53428	4.88362	EO_DC
chr8	114149874	114150274	Peak36086	0.682048	0.00978293	6.85806	6.08613	6.63413	EO_DC
chr8	114289418	114289818	Peak36099	0.784899	0.00293716	6.64525	5.7553	7.12348	EO_DC
chr8	114414020	114414420	Peak36108	0.733092	0.0331041	5.89808	4.97269	5.29217	EO_DC
chr8	114448853	114449253	Peak36116	1.08871	0.00176549	5.95524	4.56512	4.95458	EO_DC
chr8	114467457	114467857	Peak36120	1.01201	0.00159162	6.18273	4.94858	5.93573	EO_DC
chr8	11525991	11526391	Peak36140	0.683366	0.0398308	6.07538	5.23077	5.31526	EO_DC
chr8	116013308	116013708	Peak36151	0.820043	0.0472447	4.87848	3.6272	4.82599	EO_DC
chr8	116866292	116866692	Peak36165	0.781807	0.0496803	5.20999	4.08555	4.58201	EO_DC
chr8	116923249	116923649	Peak36167	1.75715	1.78736e-05	5.91025	3.50276	4.37111	EO_DC
chr8	116992645	116993045	Peak36169	1.62866	2.64239e-05	6.00945	3.84986	4.39669	EO_DC
chr8	119096939	119097339	Peak36197	0.686251	0.0278566	6.23898	5.41682	6.13794	EO_DC
chr8	119458895	119459295	Peak36212	1.00062	0.00467986	5.54438	4.24943	6.2675	EO_DC
chr8	119866559	119866959	Peak36233	0.763269	0.0158773	6.19354	5.27021	5.52671	EO_DC
chr8	120027427	120027827	Peak36243	0.694457	0.0261701	6.41311	5.57947	5.68428	EO_DC
chr8	121047779	121048179	Peak36258	1.18678	0.00057542	5.93333	4.4339	5.45479	EO_DC
chr8	121301338	121301738	Peak36262	1.32271	0.00120608	5.371	3.436	4.74722	EO_DC
chr8	123042608	123043008	Peak36342	1.16459	8.59126e-08	7.61683	6.35396	7.57892	EO_DC
chr8	123327499	123327899	Peak36364	1.31159	0.000320808	5.83908	4.12943	4.96995	EO_DC
chr8	124490834	124491234	Peak36433	0.756702	0.0162838	6.34603	5.43245	5.49906	EO_DC
chr8	12499662	12500062	Peak36461	0.83006	0.00664314	6.37112	5.38015	5.86335	EO_DC
chr8	125865392	125865792	Peak36510	0.658449	0.0248815	6.39601	5.62663	6.46858	EO_DC
chr8	126535913	126536313	Peak36552	0.962028	0.00549523	5.72807	4.49975	6.16246	EO_DC
chr8	126740887	126741287	Peak36558	2.21531	1.51346e-10	6.76439	4.17013	5.34164	EO_DC
chr8	126759393	126759793	Peak36560	0.816979	0.00552332	6.47687	5.51625	6.23435	EO_DC
chr8	128297339	128297739	Peak36623	1.2106	6.29279e-05	6.56087	5.12894	5.83134	EO_DC
chr8	129384581	129384981	Peak36664	1.08942	0.000198025	6.50653	5.23077	6.38429	EO_DC
chr8	129649627	129650027	Peak36675	0.643686	0.0489732	6.18546	5.39847	5.57467	EO_DC
chr8	129775911	129776311	Peak36680	0.737632	0.0472089	5.45199	4.46771	5.49518	EO_DC
chr8	131233141	131233541	Peak36710	0.749883	0.043843	5.43546	4.43285	5.37732	EO_DC
chr8	13541584	13541984	Peak36735	0.808075	0.0454431	5.1363	3.94747	4.0575	EO_DC
chr8	13961634	13962034	Peak36751	0.803254	0.0268765	5.74194	4.68473	5.13506	EO_DC
chr8	14014638	14015038	Peak36754	0.894016	0.00216994	6.58106	5.53391	6.74875	EO_DC
chr8	14967730	14968130	Peak36772	1.00048	0.00304083	5.91025	4.65502	5.82062	EO_DC
chr8	15157905	15158305	Peak36779	0.975135	0.0234925	4.49826	2.84867	4.56614	EO_DC
chr8	15840376	15840776	Peak36784	0.918132	0.0292541	4.82942	3.3638	4.36395	EO_DC
chr8	15984174	15984574	Peak36786	1.00216	0.000118521	7.03123	5.89978	7.04401	EO_DC
chr8	16006488	16006888	Peak36787	1.04625	0.00768851	5.28417	3.79559	4.65404	EO_DC
chr8	19500354	19500754	Peak36819	0.808244	0.0392987	5.35448	4.20879	4.86983	EO_DC
chr8	22136004	22136404	Peak36827	0.633236	0.046244	6.22956	5.46669	5.85509	EO_DC
chr8	24273646	24274046	Peak36883	1.76824	8.00902e-10	6.99987	4.99569	6.51849	EO_DC
chr8	24299725	24300125	Peak36885	1.49573	1.0861e-05	6.23885	4.3982	5.47254	EO_DC
chr8	25672253	25672653	Peak36915	1.41931	6.45309e-05	6.16528	4.36242	4.22355	EO_DC
chr8	25676643	25677043	Peak36916	1.13854	0.00287469	5.55971	3.99569	4.42399	EO_DC
chr8	27558481	27558881	Peak36986	1.35529	6.13777e-05	6.21106	4.5328	5.12638	EO_DC
chr8	28312657	28313057	Peak37007	1.02923	0.00164446	6.1926	4.92518	5.64098	EO_DC
chr8	29657690	29658090	Peak37028	1.3991	0.00118847	4.96552	2.74388	4.84983	EO_DC
chr8	33155046	33155446	Peak37059	1.48693	1.76556e-05	5.9784	4.12911	6.31271	EO_DC
chr8	33331540	33331940	Peak37061	0.994951	0.00458669	5.71387	4.4339	5.55168	EO_DC
chr8	33778155	33778555	Peak37065	1.22485	3.62234e-05	6.74431	5.30789	5.92532	EO_DC
chr8	34981797	34982197	Peak37104	0.786294	0.0351877	5.4199	4.36187	5.3888	EO_DC
chr8	35006213	35006613	Peak37108	0.87001	0.0209809	5.43546	4.25152	5.07483	EO_DC
chr8	35103474	35103874	Peak37120	0.930124	0.00456386	6.02271	4.87392	5.70191	EO_DC
chr8	35142576	35142976	Peak37122	1.45036	4.60156e-07	6.93823	5.27036	5.87846	EO_DC
chr8	3552136	3552536	Peak37135	0.700277	0.0340743	6.07405	5.21063	5.17821	EO_DC
chr8	35996248	35996648	Peak37153	0.999988	0.0163327	4.92036	3.36435	4.49845	EO_DC
chr8	37341409	37341809	Peak37189	1.35762	0.0018784	4.9896	2.74133	3.73586	EO_DC
chr8	37543200	37543600	Peak37192	0.82492	0.00952461	6.19354	5.19161	5.57834	EO_DC
chr8	37644116	37644516	Peak37200	0.698883	0.0121555	6.66597	5.86262	6.7058	EO_DC
chr8	40094578	40094978	Peak37226	1.19112	0.00190806	5.58886	3.95005	4.65404	EO_DC
chr8	40414701	40415101	Peak37231	1.37467	9.8276e-05	6.03328	4.28983	5.05445	EO_DC
chr8	40733766	40734166	Peak37234	0.870333	0.0352141	4.89941	3.56512	4.18658	EO_DC
chr8	40898672	40899072	Peak37236	0.848268	0.0437972	4.77611	3.4339	4.68588	EO_DC
chr8	41237797	41238197	Peak37238	1.36437	0.00107037	5.33704	3.29128	4.33045	EO_DC
chr8	42048403	42048803	Peak37262	0.615826	0.00570788	7.212	6.54132	7.68383	EO_DC
chr8	43327560	43327960	Peak37293	1.07265	0.0131038	4.67449	2.84789	3.96022	EO_DC
chr8	4366179	4366579	Peak37294	0.847534	0.0169942	5.63121	4.53305	5.39122	EO_DC
chr8	4413113	4413513	Peak37297	0.879918	0.027483	5.07567	3.796	4.76968	EO_DC
chr8	44374729	44375129	Peak37299	2.01668	2.65219e-10	6.72704	4.39847	6.53845	EO_DC
chr8	44385169	44385569	Peak37301	0.965911	0.00255549	6.17307	4.99552	6.15187	EO_DC
chr8	4481560	4481960	Peak37313	1.64069	2.02011e-05	5.95636	3.79437	4.55756	EO_DC
chr8	44876867	44877267	Peak37315	0.909978	0.0235545	5.28442	3.94858	3.68375	EO_DC
chr8	4586470	4586870	Peak37319	0.74835	0.0297978	5.63121	4.68385	6.46086	EO_DC
chr8	46084064	46084464	Peak37330	0.70166	0.0275515	6.2128	5.36311	5.35341	EO_DC
chr8	46318629	46319029	Peak37339	0.661584	0.0495326	5.84046	5.01869	5.81752	EO_DC
chr8	46321830	46322230	Peak37340	0.708944	0.0119153	6.68045	5.86155	5.75713	EO_DC
chr8	47299350	47299750	Peak37368	0.806222	0.0164017	5.98013	4.97341	6.04457	EO_DC
chr8	47531322	47531722	Peak37373	1.40258	3.23258e-05	6.1632	4.4339	5.70385	EO_DC
chr8	48144302	48144702	Peak37396	0.916188	0.00257338	5.88731	4.79662	7.7046	EO_DC
chr8	49006169	49006569	Peak37434	0.996042	0.000957317	6.45176	5.27006	5.98879	EO_DC
chr8	49028494	49028894	Peak37438	0.792539	0.0238223	5.83838	4.82258	4.99154	EO_DC
chr8	49211815	49212215	Peak37447	0.870481	0.017975	5.66132	4.50075	4.98602	EO_DC
chr8	49260649	49261049	Peak37449	0.980676	0.0148197	4.94295	3.50075	5.56885	EO_DC
chr8	49273892	49274292	Peak37451	1.2444	0.00321769	4.98867	3.04201	4.34911	EO_DC
chr8	49837329	49837729	Peak37465	1.00349	0.0049599	5.83977	4.53256	4.40499	EO_DC
chr8	50658865	50659265	Peak37471	1.0302	0.0177037	4.64248	2.84789	4.16414	EO_DC
chr8	51142340	51142740	Peak37475	0.804761	0.0449417	5.21267	4.03925	4.46797	EO_DC
chr8	52210757	52211157	Peak37477	1.15736	0.00300493	5.41944	3.796	4.65404	EO_DC
chr8	53441712	53442112	Peak37480	0.863155	0.00222509	6.59611	5.59673	6.47056	EO_DC
chr8	5350776	5351176	Peak37481	1.42629	0.000472145	5.48492	3.4318	4.15434	EO_DC
chr8	55594583	55594983	Peak37500	1.06435	0.00461621	5.52996	4.08588	4.76223	EO_DC
chr8	55702241	55702641	Peak37503	0.707316	0.0131267	6.7192	5.89987	5.77289	EO_DC
chr8	60239712	60240112	Peak37544	0.852647	0.0185867	5.58927	4.46797	5.12928	EO_DC
chr8	63787665	63788065	Peak37583	0.726761	0.0438581	5.60291	4.65704	5.50353	EO_DC
chr8	64194373	64194773	Peak37606	0.793759	0.0157038	6.04272	5.06411	5.48329	EO_DC
chr8	64763364	64763764	Peak37617	0.812987	0.0360432	5.26611	4.12976	5.10594	EO_DC
chr8	66209573	66209973	Peak37621	0.914713	0.0092431	5.80461	4.62605	5.34911	EO_DC
chr8	67476008	67476408	Peak37650	1.12076	0.00158805	5.69933	4.25003	5.78714	EO_DC
chr8	67718124	67718524	Peak37660	0.756737	0.0490104	5.17197	4.12943	5.90361	EO_DC
chr8	68142101	68142501	Peak37664	1.03751	0.000929356	6.3799	5.12862	5.03688	EO_DC
chr8	68847206	68847606	Peak37666	0.942209	0.00650936	5.82768	4.62651	5.29029	EO_DC
chr8	69306559	69306959	Peak37674	1.68037	1.82455e-05	5.92134	3.68451	3.92243	EO_DC
chr8	70794925	70795325	Peak37695	1.1279	0.00199561	5.66073	4.17171	5.53329	EO_DC
chr8	70837882	70838282	Peak37697	0.918844	0.0132028	5.55992	4.32658	4.72648	EO_DC
chr8	70944312	70944712	Peak37699	0.774258	0.000915479	7.32898	6.47662	7.04094	EO_DC
chr8	71551665	71552065	Peak37713	1.29209	1.48743e-05	6.68504	5.16966	6.3133	EO_DC
chr8	7286580	7286980	Peak37788	1.2043	0.00172972	5.55782	3.89873	4.88362	EO_DC
chr8	75079701	75080101	Peak37945	1.24518	9.54094e-05	6.45357	4.94858	4.88955	EO_DC
chr8	75200765	75201165	Peak37948	1.57934	2.65621e-06	6.42036	4.5005	4.82599	EO_DC
chr8	75965092	75965492	Peak37959	0.92069	0.0164867	5.31988	4.04201	4.87329	EO_DC
chr8	76282727	76283127	Peak37961	1.06479	0.00546445	5.46855	3.99463	4.54577	EO_DC
chr8	77549900	77550300	Peak37977	1.39948	9.90738e-06	6.52215	4.84887	5.10379	EO_DC
chr8	77939549	77939949	Peak37990	0.869198	0.012894	5.98804	4.87431	5.07702	EO_DC
chr8	79709882	79710282	Peak37997	1.00118	0.00735082	5.75146	4.3982	4.07402	EO_DC
chr8	82318753	82319153	Peak38082	2.29483	2.65219e-10	6.57363	3.84828	6.12967	EO_DC
chr8	85506871	85507271	Peak38115	0.673458	0.0286446	6.31975	5.51835	6.2724	EO_DC
chr8	85560662	85561062	Peak38116	1.55552	2.8254e-05	6.05373	4.04028	4.2844	EO_DC
chr8	86263437	86263837	Peak38149	0.84178	0.00220117	6.66626	5.69959	6.37732	EO_DC
chr8	87063320	87063720	Peak38215	1.69703	3.10331e-06	6.17485	4.04063	5.2424	EO_DC
chr8	87174107	87174507	Peak38229	0.694613	0.00218762	7.28531	6.52535	7.21984	EO_DC
chr8	87996701	87997101	Peak38300	0.688199	0.00350351	7.13944	6.3811	7.10526	EO_DC
chr8	88917717	88918117	Peak38316	0.78924	0.0185083	5.75275	4.76851	6.34595	EO_DC
chr8	90153573	90153973	Peak38348	0.677165	0.0476915	5.97745	5.12862	5.5295	EO_DC
chr8	90907106	90907506	Peak38382	0.859945	0.0208895	5.48404	4.3263	5.06578	EO_DC
chr8	91359932	91360332	Peak38394	1.616	2.45682e-06	6.26778	4.28896	5.72839	EO_DC
chr8	91539447	91539847	Peak38401	0.642492	0.021797	6.52194	5.78356	7.23251	EO_DC
chr8	95965861	95966261	Peak38498	1.76671	1.80325e-08	6.80195	4.74197	5.57679	EO_DC
chr8	97311520	97311920	Peak38533	0.816027	0.0263324	5.61743	4.5328	4.81621	EO_DC
chr8	97446465	97446865	Peak38545	0.938675	0.000602342	6.79007	5.71375	6.0968	EO_DC
chr8	97951541	97951941	Peak38570	0.812381	0.00965288	6.21159	5.23152	5.77894	EO_DC
chr8	98123674	98124074	Peak38581	0.87408	0.00930517	6.04181	4.94858	5.60357	EO_DC
chr8	9935197	9935597	Peak38612	0.780806	0.0417118	5.4037	4.32828	4.85334	EO_DC
chr9	100354541	100354941	Peak38620	0.763652	0.0359675	5.63141	4.62697	4.79081	EO_DC
chr9	100942504	100942904	Peak38628	1.24761	0.000814843	5.65955	3.99605	5.02532	EO_DC
chr9	102686669	102687069	Peak38652	1.05368	0.00108416	6.21213	4.92424	5.31966	EO_DC
chr9	102902664	102903064	Peak38658	1.0304	0.00574626	5.56139	4.17044	5.02532	EO_DC
chr9	106672506	106672906	Peak38752	0.946534	0.0163942	5.30377	3.94711	4.42743	EO_DC
chr9	107863705	107864105	Peak38806	0.902371	0.00674055	6.02225	4.89778	5.81883	EO_DC
chr9	108333943	108334343	Peak38828	0.716228	0.04165	5.79007	4.87392	4.87674	EO_DC
chr9	108626029	108626429	Peak38846	0.860003	0.0232119	5.38803	4.21124	4.76968	EO_DC
chr9	108655419	108655819	Peak38847	1.49368	4.5557e-05	6.05254	4.12781	4.50293	EO_DC
chr9	109812407	109812807	Peak38878	1.17262	0.00277354	5.33826	3.68496	4.82242	EO_DC
chr9	111389217	111389617	Peak38943	1.55663	1.90155e-06	6.63875	4.77018	4.0575	EO_DC
chr9	111782317	111782717	Peak38951	1.17889	0.00392895	5.32087	3.5656	3.10379	EO_DC
chr9	113558254	113558654	Peak38965	0.863592	0.0306436	5.1555	3.89911	4.42399	EO_DC
chr9	11377840	11378240	Peak38973	0.966589	0.0137416	5.37147	3.99783	4.80538	EO_DC
chr9	114424512	114424912	Peak38996	0.827891	0.0265001	5.40534	4.28983	5.54201	EO_DC
chr9	114523484	114523884	Peak39007	0.905071	0.0131687	5.69972	4.5015	4.49845	EO_DC
chr9	117206748	117207148	Peak39053	0.706693	0.0399024	5.88596	4.99534	5.46568	EO_DC
chr9	118314019	118314419	Peak39064	0.737588	0.0488602	5.35424	4.3638	5.29734	EO_DC
chr9	119180631	119181031	Peak39100	1.05697	0.00101165	6.16376	4.87334	5.85987	EO_DC
chr9	11940775	11941175	Peak39111	0.807244	0.0140118	6.12391	5.12797	5.75951	EO_DC
chr9	120061033	120061433	Peak39136	0.727665	0.0430458	5.66053	4.7145	5.18658	EO_DC
chr9	121523458	121523858	Peak39186	1.08906	0.00626001	5.37171	3.79723	4.11978	EO_DC
chr9	14446040	14446440	Peak39262	0.777917	0.0444444	5.21133	4.12943	5.15718	EO_DC
chr9	14739249	14739649	Peak39271	0.821026	0.0310844	5.45448	4.3263	4.54577	EO_DC
chr9	17362011	17362411	Peak39291	1.5403	1.12582e-07	6.8333	5.06394	6.35622	EO_DC
chr9	21259752	21260152	Peak39378	1.36791	0.000137266	6.04256	4.28838	4.64301	EO_DC
chr9	21566744	21567144	Peak39388	1.27122	0.000167397	6.14383	4.56416	5.3888	EO_DC
chr9	22537095	22537495	Peak39433	0.69339	0.0463369	5.77882	4.89835	5.49232	EO_DC
chr9	25687295	25687695	Peak39458	1.27139	0.00130015	5.42129	3.62628	4.44149	EO_DC
chr9	29419688	29420088	Peak39481	0.941405	0.023605	4.89641	3.43232	4.86034	EO_DC
chr9	30817624	30818024	Peak39496	1.35007	0.000755941	5.35399	3.43443	5.7049	EO_DC
chr9	30826278	30826678	Peak39497	2.24805	1.46109e-09	6.33777	3.62628	6.16491	EO_DC
chr9	31246426	31246826	Peak39513	1.39693	0.000228293	5.81372	3.94858	4.70049	EO_DC
chr9	33336176	33336576	Peak39545	0.930435	0.0181745	5.37243	4.04166	3.67005	EO_DC
chr9	3439585	3439985	Peak39551	0.993454	0.00223057	6.23963	5.01974	5.31203	EO_DC
chr9	34803420	34803820	Peak39557	0.833742	0.0192056	5.85073	4.76914	4.29991	EO_DC
chr9	3563101	3563501	Peak39577	0.655793	0.0359372	6.30238	5.51674	5.25959	EO_DC
chr9	38682450	38682850	Peak39631	0.844744	0.0332864	5.30352	4.08755	4.55872	EO_DC
chr9	39203650	39204050	Peak39633	0.88934	0.00904162	6.02134	4.89968	4.57467	EO_DC
chr9	3933966	3934366	Peak39634	0.891536	0.0297384	4.85004	3.49874	5.2675	EO_DC
chr9	39784166	39784566	Peak39636	1.42955	0.000127494	5.72563	3.84907	5.40976	EO_DC
chr9	4047758	4048158	Peak39658	0.714701	0.0483519	5.64664	4.71342	4.9764	EO_DC
chr9	40614805	40615205	Peak39668	1.26062	2.04602e-05	6.66636	5.1899	6.0864	EO_DC
chr9	4192757	4193157	Peak39691	0.918024	0.0186181	5.09307	3.79641	5.70243	EO_DC
chr9	4400943	4401343	Peak39751	0.846799	0.0368691	5.05388	3.79641	4.23973	EO_DC
chr9	45170099	45170499	Peak39806	1.15224	0.00604478	5.09394	3.29244	4.6511	EO_DC
chr9	45843473	45843873	Peak39826	0.792112	0.0376117	5.33728	4.25092	4.81883	EO_DC
chr9	46389965	46390365	Peak39844	0.808442	0.0448549	5.03328	3.84828	4.61847	EO_DC
chr9	4795868	4796268	Peak39857	0.803056	0.0111531	6.35266	5.38042	5.64651	EO_DC
chr9	49914633	49915033	Peak39894	1.27703	0.00137186	5.38756	3.5656	4.69553	EO_DC
chr9	53603504	53603904	Peak39948	0.821662	0.0460928	4.98867	3.74218	4.53824	EO_DC
chr9	5412713	5413113	Peak39958	1.15886	0.00100124	5.95428	4.46771	5.31203	EO_DC
chr9	54703784	54704184	Peak39974	0.821488	0.0223035	5.573	4.4995	5.84327	EO_DC
chr9	57010863	57011263	Peak40038	0.806136	0.0301019	5.51517	4.43337	4.66206	EO_DC
chr9	57342705	57343105	Peak40054	1.30002	0.00200198	5.13405	3.1304	4.80273	EO_DC
chr9	57358291	57358691	Peak40056	0.904617	0.0072626	6.10688	4.97269	5.72124	EO_DC
chr9	57677800	57678200	Peak40075	1.23995	0.000368034	6.07405	4.50175	5.24508	EO_DC
chr9	58121790	58122190	Peak40101	1.23894	0.000195538	6.1555	4.62559	5.71161	EO_DC
chr9	61115441	61115841	Peak40162	0.836219	0.0248365	5.55887	4.43337	4.47254	EO_DC
chr9	61445072	61445472	Peak40178	0.877891	0.0252233	5.50024	4.25331	4.69553	EO_DC
chr9	62129829	62130229	Peak40195	0.773851	0.0308943	5.77593	4.76976	5.11473	EO_DC
chr9	65049244	65049644	Peak40291	0.600049	0.011368	7.17791	6.51736	7.09161	EO_DC
chr9	67056223	67056623	Peak40351	0.847822	0.00649969	6.34639	5.32573	5.90022	EO_DC
chr9	6823733	6824133	Peak40367	1.30794	0.000589758	5.61703	3.84749	5.7436	EO_DC
chr9	68369143	68369543	Peak40369	0.946914	0.0214611	5.01207	3.56704	4.52831	EO_DC
chr9	68646237	68646637	Peak40373	0.836583	0.0255521	5.4206	4.28838	5.23973	EO_DC
chr9	69935088	69935488	Peak40390	0.956487	0.00534862	5.77792	4.56488	5.69267	EO_DC
chr9	70325048	70325448	Peak40401	1.14286	0.00421372	5.33802	3.6876	4.93904	EO_DC
chr9	70335248	70335648	Peak40402	0.814661	0.0432917	4.99054	3.79478	5.0688	EO_DC
chr9	74933215	74933615	Peak40489	0.912817	0.0247177	4.98898	3.6249	4.69267	EO_DC
chr9	75862755	75863155	Peak40515	0.703806	0.0319151	6.15383	5.28983	5.04611	EO_DC
chr9	76249772	76250172	Peak40519	0.912603	0.00533774	6.27491	5.14864	5.07483	EO_DC
chr9	77333684	77334084	Peak40530	0.756671	0.045462	5.35351	4.32573	5.27276	EO_DC
chr9	78233671	78234071	Peak40564	0.909927	0.012074	5.76366	4.5656	4.75201	EO_DC
chr9	7897544	7897944	Peak40584	0.733837	0.0495288	5.48448	4.50075	4.69267	EO_DC
chr9	80132224	80132624	Peak40604	1.25268	0.00228595	5.2285	3.3627	4.73791	EO_DC
chr9	81862541	81862941	Peak40613	0.828366	0.0491994	4.87612	3.56416	3.90407	EO_DC
chr9	86385359	86385759	Peak40661	0.79242	0.034181	5.31963	4.25182	5.60924	EO_DC
chr9	86614960	86615360	Peak40666	0.998234	0.0158527	4.89974	3.3627	4.48164	EO_DC
chr9	86693340	86693740	Peak40669	0.9492	0.0089129	5.68542	4.43364	4.84279	EO_DC
chr9	86867371	86867771	Peak40673	0.884607	0.0384198	4.5903	3.12846	4.46003	EO_DC
chr9	87038975	87039375	Peak40677	0.72193	0.0218745	6.40312	5.53342	5.17896	EO_DC
chr9	88257105	88257505	Peak40691	1.10696	0.00548824	5.2857	3.68407	4.4002	EO_DC
chr9	89081872	89082272	Peak40701	0.928978	0.00502671	6.12519	4.97233	5.26295	EO_DC
chr9	90028492	90028892	Peak40714	0.859332	0.0122309	5.91075	4.82278	5.46233	EO_DC
chr9	92155689	92156089	Peak40725	1.26704	0.000514095	5.69857	4.04132	5.96435	EO_DC
chr9	92730861	92731261	Peak40731	1.62893	0.000157537	5.38685	2.95078	4.25959	EO_DC
chr9	94562155	94562555	Peak40735	1.33916	1.71755e-05	6.65818	5.0636	4.74824	EO_DC
chr9	94581089	94581489	Peak40737	0.801242	0.0428077	5.22982	4.08454	4.82503	EO_DC
chr9	96387971	96388371	Peak40769	2.29931	3.00169e-09	6.44443	3.62812	5.18176	EO_DC
chr9	99320721	99321121	Peak40830	1.50313	1.72741e-05	5.77665	3.89949	7.00517	EO_DC
chrX	111449784	111450184	Peak40895	1.44485	0.000378561	5.49826	3.43548	4.47709	EO_DC
chrX	125867306	125867706	Peak40928	0.848764	0.047087	4.43638	3.03994	5.07564	EO_DC
chrX	12873332	12873732	Peak40943	0.789766	0.0443996	5.36884	4.25152	4.61546	EO_DC
chrX	132840713	132841113	Peak40981	1.71665	0.000353511	4.64565	1.04132	4.50293	EO_DC
chrX	140703130	140703530	Peak41020	0.822893	0.0277819	5.54395	4.43311	4.9924	EO_DC
chrX	142446538	142446938	Peak41026	1.25765	0.00450456	4.6146	2.36325	4.49518	EO_DC
chrX	143649771	143650171	Peak41027	1.21088	0.00431123	5.13461	3.21247	2.89545	EO_DC
chrX	143688088	143688488	Peak41028	2.08917	4.0707e-06	5.73898	2.73793	4.12136	EO_DC
chrX	148721695	148722095	Peak41056	0.872919	0.0193888	5.4681	4.2907	5.25694	EO_DC
chrX	155948351	155948751	Peak41100	0.936978	0.0163075	5.31913	3.99498	4.77609	EO_DC
chrX	155960503	155960903	Peak41101	1.26749	0.0013371	5.35424	3.56608	5.51687	EO_DC
chrX	163057036	163057436	Peak41149	1.22602	0.00158276	5.38875	3.68407	5.56087	EO_DC
chrX	37252869	37253269	Peak41232	1.08241	0.0148989	4.37315	2.21063	3.10379	EO_DC
chrX	7251420	7251820	Peak41397	0.804051	0.0484355	5.09568	3.89873	4.12717	EO_DC
chrX	7628104	7628504	Peak41443	0.730281	0.0409373	5.63041	4.68584	5.64301	EO_DC
chrX	7815963	7816363	Peak41459	0.722908	0.0414412	5.67255	4.74303	5.6384	EO_DC
chr1	10027936	10028336	Peak2	-0.670637	0.0331703	5.35399	6.16101	6.21476	DO_EC
chr1	104161043	104161443	Peak18	-1.14812	0.000260223	4.82942	6.21163	6.42603	DO_EC
chr1	104200079	104200479	Peak19	-1.05	0.0170349	2.26714	4.21094	4.54577	DO_EC
chr1	104524517	104524917	Peak21	-0.939777	0.0342007	2.1094	4.08588	3.74549	DO_EC
chr1	106909254	106909654	Peak29	-0.927156	0.0230587	3.53103	4.92462	4.75576	DO_EC
chr1	107886701	107887101	Peak40	-0.999693	4.57713e-05	6.03146	7.14479	6.77684	DO_EC
chr1	108067875	108068275	Peak46	-0.630258	0.00303668	6.96797	7.64919	7.14773	DO_EC
chr1	108610479	108610879	Peak53	-0.848678	0.0261818	4.22982	5.40022	5.2806	DO_EC
chr1	108656107	108656507	Peak55	-0.671355	0.00434316	6.54491	7.28455	7.01794	DO_EC
chr1	11267908	11268308	Peak69	-0.650915	0.0132786	6.31247	7.04748	6.59339	DO_EC
chr1	120264615	120265015	Peak107	-1.12067	0.0110399	2.40932	4.46694	3.96022	DO_EC
chr1	120285692	120286092	Peak108	-0.944097	0.00882251	5.76201	7.00165	6.5501	DO_EC
chr1	120807722	120808122	Peak124	-0.971883	0.00681508	4.47011	5.74102	4.9764	DO_EC
chr1	120944451	120944851	Peak127	-1.25578	0.000798221	3.94714	5.6264	5.11553	DO_EC
chr1	121202027	121202427	Peak140	-1.65871	8.65098e-15	6.14411	7.92124	7.27728	DO_EC
chr1	121765456	121765856	Peak160	-2.01844	2.09346e-05	1.94778	5.12846	5.4491	DO_EC
chr1	121893725	121894125	Peak163	-0.748398	0.027552	4.92363	5.86213	5.603	DO_EC
chr1	121903568	121903968	Peak164	-0.885983	0.029008	3.70048	5.01974	4.57467	DO_EC
chr1	122017504	122017904	Peak170	-0.805832	0.00197052	6.00165	6.91197	6.62902	DO_EC
chr1	122858479	122858879	Peak181	-1.67304	0.000419826	1.52673	4.85005	2.34413	DO_EC
chr1	124253590	124253990	Peak191	-0.741469	0.0453227	4.52888	5.51687	4.93573	DO_EC
chr1	12682280	12682680	Peak197	-1.07072	0.000307675	5.32013	6.58166	6.56186	DO_EC
chr1	12708246	12708646	Peak199	-1.26167	0.000130391	4.94521	6.49363	5.33093	DO_EC
chr1	127457052	127457452	Peak207	-0.70477	0.00399971	6.25803	7.04136	6.82867	DO_EC
chr1	12804386	12804786	Peak218	-0.837223	0.0224406	4.52888	5.64163	4.51627	DO_EC
chr1	12826119	12826519	Peak219	-1.19758	4.57713e-05	5.31938	6.72072	5.29287	DO_EC
chr1	129472320	129472720	Peak231	-1.02021	0.0153325	3.03449	4.65637	4.90654	DO_EC
chr1	129801401	129801801	Peak237	-0.709998	0.0387506	5.05209	5.94747	5.21612	DO_EC
chr1	12980928	12981328	Peak238	-0.842247	0.00179369	5.95668	6.91842	6.1726	DO_EC
chr1	129999557	129999957	Peak243	-0.720113	0.00203955	6.62384	7.41702	7.32742	DO_EC
chr1	13064614	13065014	Peak254	-0.953825	0.00817946	4.40464	5.65693	5.22896	DO_EC
chr1	132196661	132197061	Peak270	-1.7702	0.000253227	0	4.79641	4.25429	DO_EC
chr1	132628304	132628704	Peak276	-0.821221	0.0103519	5.23088	6.23167	5.07783	DO_EC
chr1	132774720	132775120	Peak278	-0.889474	0.0227211	4.02903	5.28896	4.91237	DO_EC
chr1	132975289	132975689	Peak280	-1.63265	0.000365723	2.11628	4.92312	3.78078	DO_EC
chr1	133034644	133035044	Peak282	-0.656266	0.0137301	6.12363	6.86843	6.63867	DO_EC
chr1	133423929	133424329	Peak294	-0.951988	5.10584e-09	7.57771	8.57479	8.20117	DO_EC
chr1	13362503	13362903	Peak302	-0.791413	0.000339361	6.7069	7.56935	7.03498	DO_EC
chr1	133693764	133694164	Peak304	-0.677527	0.0385217	5.371	6.20154	5.63377	DO_EC
chr1	133867693	133868093	Peak315	-2.1592	3.89661e-09	3.89841	6.50871	4.36262	DO_EC
chr1	134086624	134087024	Peak323	-0.995022	0.0045853	4.62026	5.89882	5.56556	DO_EC
chr1	134219308	134219708	Peak337	-1.3025	3.24001e-07	5.76548	7.22089	6.07072	DO_EC
chr1	134230223	134230623	Peak339	-1.64646	5.68845e-06	4.11456	6.19122	4.35274	DO_EC
chr1	134288179	134288579	Peak344	-1.19881	9.59539e-05	4.89941	6.32672	6.14968	DO_EC
chr1	134373596	134373996	Peak347	-1.16449	0.000910312	4.37028	5.86184	5.34911	DO_EC
chr1	134417289	134417689	Peak348	-0.888914	0.01282	4.46967	5.62674	5.33663	DO_EC
chr1	134437696	134438096	Peak349	-0.710944	0.015917	5.73935	6.57363	5.9525	DO_EC
chr1	134439310	134439710	Peak350	-0.747786	0.0330047	4.96742	5.9248	5.25041	DO_EC
chr1	134454625	134455025	Peak351	-1.48695	0.000233083	3.40651	5.50063	4.27013	DO_EC
chr1	135027531	135027931	Peak375	-0.795616	0.000160235	6.84011	7.70016	7.38263	DO_EC
chr1	135084506	135084906	Peak379	-0.991618	0.0170994	3.40558	4.94655	4.48164	DO_EC
chr1	135203402	135203802	Peak382	-0.851044	0.0492643	2.9465	4.3982	4.37244	DO_EC
chr1	135259885	135260285	Peak389	-0.685384	0.00415116	6.72648	7.48404	6.62996	DO_EC
chr1	135294228	135294628	Peak392	-1.20823	4.96484e-06	5.80532	7.17088	6.57496	DO_EC
chr1	135305505	135305905	Peak393	-1.77207	3.61308e-05	2.94392	5.50012	4.24363	DO_EC
chr1	135389390	135389790	Peak399	-0.625003	0.0132095	6.28608	6.98383	6.70288	DO_EC
chr1	135957488	135957888	Peak418	-1.06474	2.15202e-05	5.91207	7.10199	6.61697	DO_EC
chr1	135959612	135960012	Peak419	-1.99734	1.55275e-13	5.13518	7.34076	6.33914	DO_EC
chr1	135975630	135976030	Peak421	-0.821968	0.000427785	6.42187	7.32676	6.6149	DO_EC
chr1	136223433	136223833	Peak431	-1.55703	0.000470758	2.41118	4.94692	5.04528	DO_EC
chr1	136351839	136352239	Peak439	-0.642633	0.0337294	5.62961	6.38974	6.23166	DO_EC
chr1	136391079	136391479	Peak440	-0.868206	0.000121213	6.41357	7.36314	7.15557	DO_EC
chr1	136453389	136453789	Peak445	-0.820908	5.29896e-05	6.86947	7.75198	7.09384	DO_EC
chr1	136852389	136852789	Peak456	-0.717431	0.00112033	6.68677	7.46762	6.72978	DO_EC
chr1	136892523	136892923	Peak459	-0.93417	0.0296306	3.11399	4.6854	3.33412	DO_EC
chr1	137001621	137002021	Peak462	-0.78823	0.0384903	4.33556	5.41749	5.09275	DO_EC
chr1	137154949	137155349	Peak473	-1.0643	6.58098e-05	5.72619	6.93614	6.19628	DO_EC
chr1	137221137	137221537	Peak476	-1.29766	0.00220817	3.03328	5.0636	3.89729	DO_EC
chr1	137271457	137271857	Peak478	-1.36637	0.000116477	4.26868	6.00662	5.17896	DO_EC
chr1	137573458	137573858	Peak496	-0.932476	0.0117722	4.40651	5.65592	4.25959	DO_EC
chr1	137584485	137584885	Peak497	-0.814151	0.00469337	5.69914	6.64857	6.11006	DO_EC
chr1	137662511	137662911	Peak507	-1.05324	0.000155265	5.51517	6.72793	6.06206	DO_EC
chr1	137914424	137914824	Peak520	-0.813421	0.00566771	5.63361	6.58813	5.81572	DO_EC
chr1	138027719	138028119	Peak522	-0.772606	0.00386858	6.1339	7.01368	6.11513	DO_EC
chr1	138156796	138157196	Peak529	-1.11586	0.00109096	4.70238	6.1079	4.96347	DO_EC
chr1	138242492	138242892	Peak530	-0.785838	0.00436784	5.8389	6.74197	6.05029	DO_EC
chr1	138521191	138521591	Peak542	-0.699929	0.00149245	6.65847	7.42085	7.17438	DO_EC
chr1	138629742	138630142	Peak551	-1.43967	0.000339985	3.4037	5.43416	4.65001	DO_EC
chr1	138845939	138846339	Peak557	-0.678342	0.0209832	5.63081	6.42512	6.06054	DO_EC
chr1	139275149	139275549	Peak561	-1.07607	0.00745146	3.53103	5.10881	5.30061	DO_EC
chr1	140468192	140468592	Peak566	-0.837365	0.0327136	3.89708	5.08638	5.38462	DO_EC
chr1	141318562	141318962	Peak580	-0.890371	0.00151528	5.57363	6.60394	6.37366	DO_EC
chr1	145549878	145550278	Peak601	-1.15669	8.54992e-06	5.64466	6.94876	6.96671	DO_EC
chr1	145624143	145624543	Peak605	-0.731288	0.000839924	6.65985	7.455	7.1146	DO_EC
chr1	145851186	145851586	Peak609	-0.890918	0.000798984	5.89924	6.91225	6.19591	DO_EC
chr1	152885719	152886119	Peak631	-1.16365	0.00902727	2.11628	4.39874	3.19213	DO_EC
chr1	153191312	153191712	Peak646	-0.635427	0.00830979	6.45187	7.1552	6.81638	DO_EC
chr1	153553180	153553580	Peak656	-0.902554	0.0272188	3.58948	4.9495	4.83667	DO_EC
chr1	153602134	153602534	Peak659	-0.662077	0.000282666	7.33765	8.03877	7.73939	DO_EC
chr1	154137959	154138359	Peak666	-0.987372	0.024582	2.26714	4.08521	4.92243	DO_EC
chr1	154613451	154613851	Peak676	-0.795445	0.00140659	6.09539	6.98406	6.81302	DO_EC
chr1	154750085	154750485	Peak685	-0.685065	0.00551946	6.26727	7.02979	6.67817	DO_EC
chr1	154820941	154821341	Peak691	-0.983194	0.0204987	3.11628	4.71385	4.24363	DO_EC
chr1	154942456	154942856	Peak701	-0.756426	0.0089117	5.65798	6.54071	6.21984	DO_EC
chr1	155179773	155180173	Peak711	-0.869315	6.81475e-05	6.53092	7.47601	7.18328	DO_EC
chr1	155261259	155261659	Peak717	-1.13915	0.00691041	2.84866	4.65569	5.29476	DO_EC
chr1	155379590	155379990	Peak723	-1.15028	0.000437698	4.67255	6.0858	5.77709	DO_EC
chr1	155437362	155437762	Peak726	-0.979303	0.0143895	3.69819	5.12813	4.72927	DO_EC
chr1	156570697	156571097	Peak743	-0.880247	0.0253658	4.03328	5.29026	4.29476	DO_EC
chr1	156617755	156618155	Peak745	-0.953583	0.0316549	2.2692	4.28954	2.4167	DO_EC
chr1	156646362	156646762	Peak747	-1.07672	0.015027	2.26508	4.32715	4.04694	DO_EC
chr1	156899946	156900346	Peak750	-1.02967	0.00868134	3.89774	5.36297	4.11553	DO_EC
chr1	156930587	156930987	Peak751	-1.82387	1.24248e-07	4.23246	6.4341	5.37976	DO_EC
chr1	156946536	156946936	Peak752	-1.16183	0.000169009	5.05508	6.44171	5.69996	DO_EC
chr1	156958604	156959004	Peak753	-0.981212	0.0174389	3.46653	4.97287	4.25959	DO_EC
chr1	157140589	157140989	Peak758	-0.931393	0.0332781	2.64486	4.32715	4.00968	DO_EC
chr1	157589037	157589437	Peak762	-1.11756	0.00191949	4.26611	5.72777	5.13794	DO_EC
chr1	157883025	157883425	Peak768	-0.849698	0.000264807	6.4772	7.41262	6.84191	DO_EC
chr1	158406220	158406620	Peak781	-1.35084	0.00188429	2.85004	5.06411	2.6237	DO_EC
chr1	158544294	158544694	Peak785	-0.885409	0.0153157	4.46967	5.6422	4.96995	DO_EC
chr1	158649037	158649437	Peak795	-0.8	0.00429013	5.80372	6.72669	6.65028	DO_EC
chr1	158712178	158712578	Peak799	-1.53478	0.000608662	2.40558	4.97215	3.41927	DO_EC
chr1	158719969	158720369	Peak800	-0.942955	0.0273586	3.03449	4.5965	4.26487	DO_EC
chr1	159031327	159031727	Peak810	-0.878891	0.0371108	3.33998	4.74218	4.46462	DO_EC
chr1	159388443	159388843	Peak814	-0.902429	0.00389896	5.19124	6.28013	5.83442	DO_EC
chr1	161580562	161580962	Peak829	-0.796281	0.0474236	3.99179	5.15072	4.58737	DO_EC
chr1	162142886	162143286	Peak836	-0.68886	0.000893567	6.97903	7.72118	7.17125	DO_EC
chr1	162722845	162723245	Peak844	-0.910917	0.000264391	6.10458	7.12341	6.62828	DO_EC
chr1	16283946	16284346	Peak846	-2.132	3.1154e-05	1.27331	5.08588	4.04528	DO_EC
chr1	163180971	163181371	Peak858	-0.845806	0.00645263	5.31913	6.33569	5.49621	DO_EC
chr1	163848773	163849173	Peak864	-0.91499	0.0154473	4.26817	5.51761	4.73791	DO_EC
chr1	163888285	163888685	Peak865	-0.996378	0.0111432	3.75109	5.17123	5.13139	DO_EC
chr1	163899098	163899498	Peak866	-0.711894	0.00569349	6.25725	7.05887	6.68553	DO_EC
chr1	164478470	164478870	Peak872	-0.610949	0.0272024	5.97918	6.67819	6.44784	DO_EC
chr1	164500515	164500915	Peak873	-0.786825	0.000473264	6.67371	7.53397	7.18917	DO_EC
chr1	165950928	165951328	Peak889	-0.983967	0.0055666	4.43958	5.7145	5.88705	DO_EC
chr1	166307253	166307653	Peak900	-0.613265	0.0268765	5.99023	6.69207	6.55226	DO_EC
chr1	167211864	167212264	Peak918	-0.865704	0.0179035	4.70315	5.84976	5.14369	DO_EC
chr1	167564536	167564936	Peak923	-0.846739	1.04702e-05	7.06907	7.97235	7.62156	DO_EC
chr1	168055305	168055705	Peak941	-0.600771	0.00167324	7.193	7.83254	7.89985	DO_EC
chr1	168184030	168184430	Peak947	-0.931911	0.0152064	4.03328	5.32658	4.75201	DO_EC
chr1	168870260	168870660	Peak956	-0.904527	0.0303491	3.26611	4.68451	4.77339	DO_EC
chr1	168930890	168931290	Peak958	-1.30521	0.000404103	4.15717	5.87498	5.4334	DO_EC
chr1	169214983	169215383	Peak966	-1.13284	3.58536e-06	5.93284	7.19114	6.80694	DO_EC
chr1	169279926	169280326	Peak971	-0.652888	0.00614344	6.5447	7.26578	6.6384	DO_EC
chr1	169528479	169528879	Peak977	-1.07452	0.00709102	3.80568	5.36325	4.50859	DO_EC
chr1	169986544	169986944	Peak990	-1.11828	0.00256202	4.11513	5.61112	4.71109	DO_EC
chr1	170287718	170288118	Peak993	-1.06586	0.0136298	2.75256	4.56416	4.35769	DO_EC
chr1	170335996	170336396	Peak996	-1.09699	0.00287954	4.33655	5.79662	4.20866	DO_EC
chr1	170362400	170362800	Peak998	-0.704732	0.00650676	6.10487	6.89882	6.51597	DO_EC
chr1	17087810	17088210	Peak999	-1.15495	0.000220449	5.01115	6.39827	5.47254	DO_EC
chr1	171461485	171461885	Peak1003	-0.753089	0.0181893	5.40417	6.31855	5.77018	DO_EC
chr1	171677640	171678040	Peak1004	-0.979758	0.024831	2.75109	4.5015	3.90407	DO_EC
chr1	172104960	172105360	Peak1009	-0.612491	0.0110414	6.55897	7.23677	6.96995	DO_EC
chr1	172310648	172311048	Peak1013	-1.54925	0.000230007	3.03328	5.30789	4.29476	DO_EC
chr1	172407788	172408188	Peak1014	-0.700845	0.0354118	5.17417	6.04192	5.27537	DO_EC
chr1	172519766	172520166	Peak1017	-1.52849	1.06995e-05	4.23088	6.12862	5.26487	DO_EC
chr1	172574431	172574831	Peak1020	-0.780551	0.00991958	5.43592	6.36325	5.78947	DO_EC
chr1	173200182	173200582	Peak1050	-0.776485	0.00374757	5.89858	6.78294	6.35835	DO_EC
chr1	173217912	173218312	Peak1052	-0.623627	0.0401524	5.61743	6.355	6.08382	DO_EC
chr1	173259289	173259689	Peak1056	-0.701803	0.00322185	6.62353	7.39954	6.82038	DO_EC
chr1	173341257	173341657	Peak1062	-0.777309	0.0409051	5.74194	6.80422	6.4839	DO_EC
chr1	173349740	173350140	Peak1064	-1.29097	0.0005856	3.94263	5.67118	5.09195	DO_EC
chr1	174280071	174280471	Peak1099	-1.56398	5.83021e-06	4.3015	6.23145	5.12348	DO_EC
chr1	174306419	174306819	Peak1103	-0.703558	0.00741428	6.00088	6.79662	6.68212	DO_EC
chr1	174342348	174342748	Peak1104	-0.835845	0.0324649	3.98992	5.17108	4.85684	DO_EC
chr1	174430024	174430424	Peak1109	-0.804083	0.00179076	6.16293	7.06971	6.32817	DO_EC
chr1	174458806	174459206	Peak1113	-0.756463	0.028659	4.87679	5.83608	5.1754	DO_EC
chr1	174563027	174563427	Peak1117	-0.646681	0.00511924	6.60383	7.31319	6.90146	DO_EC
chr1	175297524	175297924	Peak1124	-0.924937	0.0219561	3.80284	5.17139	4.27396	DO_EC
chr1	175350462	175350862	Peak1126	-1.04831	0.00828455	3.69819	5.2117	4.59464	DO_EC
chr1	176431762	176432162	Peak1135	-1.11607	0.00010346	5.48603	6.78315	5.83134	DO_EC
chr1	176969736	176970136	Peak1140	-0.924439	0.00896269	4.56013	5.75625	5.08382	DO_EC
chr1	177555589	177555989	Peak1143	-0.671603	0.00370356	6.55206	7.28968	7.06584	DO_EC
chr1	178924254	178924654	Peak1154	-0.750097	0.0483665	4.26714	5.28939	5.15357	DO_EC
chr1	179118852	179119252	Peak1156	-0.931971	0.020684	3.64486	5.01921	4.69267	DO_EC
chr1	179372002	179372402	Peak1161	-0.803403	0.000681835	6.32935	7.21649	6.84743	DO_EC
chr1	179485899	179486299	Peak1162	-1.48792	0.000349921	3.03328	5.21078	4.98282	DO_EC
chr1	179638691	179639091	Peak1165	-1.15965	0.0063953	3.03328	4.90006	3.81524	DO_EC
chr1	179683634	179684034	Peak1167	-0.989293	0.00889367	4.11399	5.46746	4.57041	DO_EC
chr1	180267754	180268154	Peak1177	-1.11982	2.32193e-05	5.7373	7.00755	6.80851	DO_EC
chr1	180336363	180336763	Peak1180	-0.79859	0.000356754	6.52258	7.39502	7.26157	DO_EC
chr1	180460667	180461067	Peak1184	-0.82376	0.0108988	5.03207	6.04106	5.67547	DO_EC
chr1	181447918	181448318	Peak1200	-0.790389	0.0161068	5.03267	6.00706	5.64301	DO_EC
chr1	181476287	181476687	Peak1201	-0.702966	0.000696769	6.92767	7.68551	7.20036	DO_EC
chr1	181534630	181535030	Peak1204	-0.90041	0.0363572	3.19801	4.71515	4.13716	DO_EC
chr1	181598180	181598580	Peak1207	-1.22868	1.28238e-05	5.45244	6.86799	5.8108	DO_EC
chr1	181889901	181890301	Peak1216	-2.52609	1.96112e-10	3.33409	6.38103	6.03646	DO_EC
chr1	182571169	182571569	Peak1238	-0.777646	0.00764698	5.57425	6.48452	5.93859	DO_EC
chr1	182655883	182656283	Peak1243	-0.861741	0.0021077	5.73916	6.73547	6.02178	DO_EC
chr1	182743695	182744095	Peak1248	-0.80596	0.0331863	5.78828	6.88796	6.80653	DO_EC
chr1	182780805	182781205	Peak1249	-0.843247	6.70077e-05	6.84063	7.75269	7.323	DO_EC
chr1	182864636	182865036	Peak1257	-1.00931	0.00350921	4.58948	5.87363	5.20792	DO_EC
chr1	182872703	182873103	Peak1259	-1.06816	0.00361079	4.19205	5.61158	5.0514	DO_EC
chr1	183140752	183141152	Peak1270	-0.829552	0.0350798	3.98929	5.17092	4.81621	DO_EC
chr1	183186888	183187288	Peak1273	-1.06917	0.00223479	4.37123	5.74187	5.53269	DO_EC
chr1	183772370	183772770	Peak1279	-1.14058	7.25579e-07	6.18355	7.43383	6.76503	DO_EC
chr1	183783166	183783566	Peak1281	-1.0568	0.0115394	3.26508	4.92443	4.00968	DO_EC
chr1	183950060	183950460	Peak1290	-1.29814	9.07429e-05	4.50177	6.0959	6.18797	DO_EC
chr1	184212431	184212831	Peak1303	-0.734428	0.00489546	6.12462	6.95464	6.44414	DO_EC
chr1	184227333	184227733	Peak1304	-1.11999	0.0115139	2.12085	4.25122	4.51627	DO_EC
chr1	184339001	184339401	Peak1307	-0.636282	0.00489546	6.64565	7.34086	6.99075	DO_EC
chr1	184419910	184420310	Peak1308	-1.11095	0.00194429	4.26456	5.71375	5.41214	DO_EC
chr1	184447434	184447834	Peak1310	-0.853366	0.00452758	5.38709	6.39901	5.80489	DO_EC
chr1	184458550	184458950	Peak1311	-0.981051	0.00955171	3.94714	5.28939	5.44382	DO_EC
chr1	184694111	184694511	Peak1316	-0.611616	0.0430272	5.71292	6.43423	5.86288	DO_EC
chr1	184838540	184838940	Peak1320	-2.45383	2.4503e-06	1.7599	5.5328	4.06799	DO_EC
chr1	185857940	185858340	Peak1326	-0.648038	0.000556107	7.35844	8.04718	7.56906	DO_EC
chr1	187033532	187033932	Peak1351	-0.673797	0.0165894	5.80408	6.5803	6.55736	DO_EC
chr1	187186670	187187070	Peak1356	-0.612998	0.0173607	6.43443	7.12373	7.12856	DO_EC
chr1	187642810	187643210	Peak1359	-2.02824	7.32825e-05	0.94521	4.99552	3.08002	DO_EC
chr1	189731666	189732066	Peak1381	-1.30423	0.00041441	4.15605	5.87469	4.1754	DO_EC
chr1	190837207	190837607	Peak1388	-0.779961	0.00670547	5.55887	6.46791	6.42925	DO_EC
chr1	191551796	191552196	Peak1396	-0.654509	0.0119091	6.25738	6.99503	6.20755	DO_EC
chr1	191706822	191707222	Peak1406	-0.944354	0.0127288	4.03267	5.32715	5.21612	DO_EC
chr1	191740349	191740749	Peak1410	-1.60502	1.05298e-07	4.85176	6.71418	6.12097	DO_EC
chr1	192803014	192803414	Peak1430	-1.11286	0.000169338	5.37004	6.67869	5.86856	DO_EC
chr1	192849950	192850350	Peak1432	-0.775032	6.77047e-05	7.10573	7.93342	7.54424	DO_EC
chr1	193541713	193542113	Peak1457	-0.750098	0.0163675	5.3878	6.28983	5.4594	DO_EC
chr1	193645065	193645465	Peak1459	-0.63759	0.00922821	6.48326	7.19177	6.94863	DO_EC
chr1	193813870	193814270	Peak1467	-0.957877	0.00356182	4.96615	6.1508	5.603	DO_EC
chr1	194281364	194281764	Peak1476	-1.0534	0.0130413	3.19909	4.89949	4.42399	DO_EC
chr1	194621137	194621537	Peak1485	-1.78884	7.52667e-06	3.52501	5.91164	4.98922	DO_EC
chr1	194681611	194682011	Peak1488	-1.10324	0.00510159	3.69742	5.27051	4.81883	DO_EC
chr1	194862010	194862410	Peak1489	-0.701192	0.00094967	6.94505	7.70355	7.48349	DO_EC
chr1	194979063	194979463	Peak1491	-0.628893	0.0343911	5.82698	6.56494	5.09492	DO_EC
chr1	195208636	195209036	Peak1498	-1.28605	0.00135491	3.4037	5.25182	5.08978	DO_EC
chr1	195336243	195336643	Peak1502	-0.922081	0.0108963	4.4987	5.71331	4.57892	DO_EC
chr1	196445786	196446186	Peak1512	-0.605926	0.0447341	5.91971	6.63466	6.43362	DO_EC
chr1	196573045	196573445	Peak1514	-1.03568	0.00691479	3.94778	5.38178	5.1726	DO_EC
chr1	196957102	196957502	Peak1523	-0.60857	0.0358893	5.72694	6.43364	6.26487	DO_EC
chr1	19917897	19918297	Peak1526	-1.30958	0.00356732	2.1117	4.59579	3.10379	DO_EC
chr1	20898680	20899080	Peak1533	-0.962566	0.0143895	3.64565	5.01974	5.61697	DO_EC
chr1	23262805	23263205	Peak1550	-1.30193	1.556e-07	5.94408	7.39032	6.44646	DO_EC
chr1	23390038	23390438	Peak1552	-0.744477	0.00839905	5.76475	6.62611	6.12387	DO_EC
chr1	23929033	23929433	Peak1556	-0.794729	0.0255044	4.72488	5.75499	5.04834	DO_EC
chr1	23975051	23975451	Peak1559	-0.937223	0.0241328	3.46832	4.92462	3.87674	DO_EC
chr1	24685231	24685631	Peak1563	-0.622189	0.033014	5.84115	6.56566	6.36329	DO_EC
chr1	25366933	25367333	Peak1567	-0.844323	0.030426	4.15438	5.34545	4.16567	DO_EC
chr1	26286507	26286907	Peak1570	-0.96242	0.0213168	3.33605	4.84986	4.45541	DO_EC
chr1	31290476	31290876	Peak1582	-0.888882	0.0102796	4.8039	5.93748	5.7863	DO_EC
chr1	33328450	33328850	Peak1586	-0.985379	0.0166831	3.47101	4.97287	4.55442	DO_EC
chr1	33678645	33679045	Peak1590	-1.25142	0.000319559	4.46788	6.05396	5.74962	DO_EC
chr1	33726786	33727186	Peak1594	-0.759616	0.0436171	4.40745	5.43298	5.5251	DO_EC
chr1	33814366	33814766	Peak1597	-1.27904	0.000219482	4.37219	5.98433	5.35835	DO_EC
chr1	33964285	33964685	Peak1600	-1.0009	0.000929356	5.46653	6.65648	6.23191	DO_EC
chr1	34001806	34002206	Peak1602	-1.0273	0.000351151	5.45153	6.64896	6.35036	DO_EC
chr1	34063797	34064197	Peak1604	-1.72335	9.88297e-10	5.09452	7.04141	6.0964	DO_EC
chr1	34293163	34293563	Peak1618	-1.62326	2.87442e-07	4.67255	6.58783	5.66552	DO_EC
chr1	34636329	34636729	Peak1628	-0.899084	0.00433441	5.20945	6.29853	5.88191	DO_EC
chr1	36300960	36301360	Peak1659	-0.642984	0.0369749	5.51452	6.28005	6.01397	DO_EC
chr1	36425837	36426237	Peak1668	-0.712961	0.0262163	5.23035	6.09698	5.98443	DO_EC
chr1	36549272	36549672	Peak1671	-1.28215	0.00187506	3.33409	5.25152	4.39187	DO_EC
chr1	36603978	36604378	Peak1673	-0.760152	0.000595699	6.67187	7.50097	6.99769	DO_EC
chr1	36613912	36614312	Peak1674	-1.17538	4.70493e-06	5.8039	7.12308	6.27371	DO_EC
chr1	3661470	3661870	Peak1675	-2.5603	4.90069e-11	3.46832	6.51649	5.55814	DO_EC
[truncated: 8,867 more rows]

## Sheet: 2A-ESCvsLEPSC
chr	Start	End	PeakID	ESC_LEPSC_logFC	ESC_LEPSC_FDR	Normalized_reads_ESC	Normalized_reads_DEPSC	Normalized_reads_LEPSC	status
chr1	10021774	10022174	Peak1	1.6974	5.14308e-05	6.10458	4.50075	4.01596	EO_LC
chr1	100563975	100564375	Peak5	0.801883	0.0151748	5.88781	4.39847	4.58623	EO_LC
chr1	11391215	11391615	Peak76	0.683498	0.0333114	5.69933	5.4681	4.57467	EO_LC
chr1	132634089	132634489	Peak277	0.760126	0.0288804	5.54374	3.79478	4.11978	EO_LC
chr1	135308125	135308525	Peak394	0.878367	0.0112118	5.69819	4.89949	4.25429	EO_LC
chr1	136085627	136086027	Peak426	1.21325	0.000191048	6.46933	5.56512	4.92577	EO_LC
chr1	137677554	137677954	Peak509	1.28525	0.00177021	5.71368	3.94821	3.79348	EO_LC
chr1	137707752	137708152	Peak512	0.655904	0.0482472	5.43592	5.12829	4.26487	EO_LC
chr1	152344078	152344478	Peak626	0.916406	0.00192044	6.67794	5.80986	5.43511	EO_LC
chr1	159216696	159217096	Peak811	1.18867	0.00360553	5.43638	4.21094	3.5501	EO_LC
chr1	168308985	168309385	Peak952	0.698931	0.00992122	6.87544	6.14004	5.93904	EO_LC
chr1	178574235	178574635	Peak1151	1.79046	3.89338e-05	6.1732	3.43337	3.98602	EO_LC
chr1	17922181	17922581	Peak1158	0.705114	0.00861841	6.78953	6.55759	5.84279	EO_LC
chr1	183775304	183775704	Peak1280	0.676522	0.0160179	6.63835	5.7958	5.70243	EO_LC
chr1	185843155	185843555	Peak1325	0.96538	0.0060509	5.84046	4.71493	4.32404	EO_LC
chr1	186660287	186660687	Peak1339	1.78111	2.16883e-06	6.58896	4.92406	4.55442	EO_LC
chr1	195313019	195313419	Peak1500	1.30826	0.000605051	6.0742	4.43469	4.31016	EO_LC
chr1	36070659	36071059	Peak1650	0.780777	0.00455214	7.00181	5.43482	5.94803	EO_LC
chr1	37988630	37989030	Peak1723	1.01517	0.00946462	5.20865	5.08571	3.4002	EO_LC
chr1	38926059	38926459	Peak1740	0.862506	0.021457	4.9671	4.4672	3.24363	EO_LC
chr1	55270382	55270782	Peak1925	1.10665	0.00540012	5.4847	3.36325	3.65404	EO_LC
chr1	58709405	58709805	Peak1956	0.884105	0.0132312	5.5448	4.46823	4.04079	EO_LC
chr1	59127754	59128154	Peak1968	0.895835	0.00894498	5.86211	4.92312	4.43214	EO_LC
chr1	62753120	62753520	Peak2026	0.60621	0.0377613	6.32848	5.92443	5.45079	EO_LC
chr1	62783101	62783501	Peak2027	1.86271	7.12815e-06	6.45131	4.5972	4.24897	EO_LC
chr1	62784747	62785147	Peak2028	0.980992	0.00565178	5.97714	3.68672	4.45079	EO_LC
chr1	6438802	6439202	Peak2071	1.29248	0.000826742	6.04272	3.99427	4.24897	EO_LC
chr1	74795218	74795618	Peak2215	0.742099	0.017333	6.10659	5.36352	4.96022	EO_LC
chr1	75491691	75492091	Peak2262	0.637739	0.0475795	5.78918	4.94858	4.72264	EO_LC
chr1	78598537	78598937	Peak2307	0.834768	0.00699609	6.2399	5.01886	5.01908	EO_LC
chr1	84329332	84329732	Peak2346	0.73285	0.0218109	6.17265	4.43495	4.99704	EO_LC
chr1	92895145	92895545	Peak2522	1.11189	0.00294778	5.72544	5.12927	4.03295	EO_LC
chr1	95602043	95602443	Peak2594	0.819246	0.0201376	5.48359	3.99534	4.02843	EO_LC
chr10	103172659	103173059	Peak2647	0.939713	0.0103406	5.57467	3.99427	3.98602	EO_LC
chr10	105190904	105191304	Peak2652	1.09398	0.000963989	6.36397	4.7424	4.87329	EO_LC
chr10	111760269	111760669	Peak2751	0.807786	0.0225162	5.35424	4.39847	3.89047	EO_LC
chr10	120375328	120375728	Peak2897	0.683604	0.033149	5.89858	4.74282	4.77709	EO_LC
chr10	125403401	125403801	Peak2985	0.858063	0.00448309	6.33667	5.64106	5.11473	EO_LC
chr10	127078816	127079216	Peak3049	0.603287	0.0369293	6.3799	5.796	5.51406	EO_LC
chr10	12780730	12781130	Peak3092	0.81261	0.0206095	5.60189	4.13008	4.16567	EO_LC
chr10	14479644	14480044	Peak3169	0.917586	0.0113482	5.76347	4.29099	4.21413	EO_LC
chr10	14983112	14983512	Peak3173	0.732888	0.0116647	6.51365	5.94895	5.46568	EO_LC
chr10	15305885	15306285	Peak3175	0.68169	0.0374845	5.73898	4.25003	4.57041	EO_LC
chr10	20810826	20811226	Peak3269	0.844408	0.00944491	6.02088	4.74155	4.72264	EO_LC
chr10	21708327	21708727	Peak3293	0.906793	0.00871927	5.8282	4.21155	4.38704	EO_LC
chr10	31253336	31253736	Peak3413	1.219	0.00498898	5.1332	4.12943	3.0222	EO_LC
chr10	3996709	3997109	Peak3511	1.06887	0.00304446	5.86365	4.46797	4.27013	EO_LC
chr10	42580372	42580772	Peak3587	0.688482	0.0486554	5.22903	3.95005	3.81524	EO_LC
chr10	47351151	47351551	Peak3663	1.01073	0.000887953	6.40347	6.39029	5.04528	EO_LC
chr10	51397544	51397944	Peak3682	0.661243	0.0383487	5.77701	5.27051	4.69267	EO_LC
chr10	5633690	5634090	Peak3725	0.783286	0.0183441	5.67352	5.27051	4.39187	EO_LC
chr10	57211814	57212214	Peak3729	0.737749	0.0279414	5.63281	4.65637	4.35902	EO_LC
chr10	60289429	60289829	Peak3825	0.874031	0.00514875	6.00992	6.40794	4.73689	EO_LC
chr10	60415235	60415635	Peak3830	1.19089	0.00485151	5.11485	4.87314	3.09195	EO_LC
chr10	64199347	64199747	Peak3954	2.40611	5.32235e-07	6.26637	3.2907	3.4002	EO_LC
chr10	67694175	67694575	Peak4011	0.915862	0.00614075	6.19151	3.62766	4.79811	EO_LC
chr10	69754771	69755171	Peak4050	2.11364	6.33831e-06	6.13405	4.36435	3.57352	EO_LC
chr10	7393354	7393754	Peak4100	0.938938	0.0102857	5.57259	4.46797	3.9924	EO_LC
chr10	83913022	83913422	Peak4494	0.835034	0.025315	5.19178	3.84591	3.45417	EO_LC
chr10	87148786	87149186	Peak4580	0.762355	0.0158493	6.10458	4.53231	4.92243	EO_LC
chr10	88289132	88289532	Peak4603	0.62073	0.0388044	6.21106	5.54905	5.26942	EO_LC
chr10	89927706	89928106	Peak4624	0.711236	0.0410592	5.32186	3.50025	3.92243	EO_LC
chr10	93257891	93258291	Peak4682	0.90963	0.0127858	5.51344	4.40035	3.9291	EO_LC
chr10	97552915	97553315	Peak4780	0.679262	0.0395245	5.80141	4.32715	4.60604	EO_LC
chr11	105025906	105026306	Peak5074	0.665123	0.045208	5.48492	4.84907	4.29991	EO_LC
chr11	109856941	109857341	Peak5189	0.69065	0.0311751	5.70029	5.43364	4.56614	EO_LC
chr11	111704999	111705399	Peak5208	0.978104	0.00353261	6.18423	4.85025	4.74824	EO_LC
chr11	113571523	113571923	Peak5237	0.776697	0.00105873	7.34203	6.38076	6.37943	EO_LC
chr11	116288189	116288589	Peak5390	1.11456	0.00123022	6.29413	4.87256	4.75201	EO_LC
chr11	119492644	119493044	Peak5576	0.709904	0.0340485	5.61642	4.74155	4.34278	EO_LC
chr11	120766821	120767221	Peak5651	0.708752	0.0204647	6.11528	5.4339	5.04611	EO_LC
chr11	16575946	16576346	Peak5716	0.664228	0.0365427	5.97981	4.46823	4.89637	EO_LC
chr11	22500400	22500800	Peak5815	0.672803	0.043766	5.5465	4.71277	4.33914	EO_LC
chr11	27975497	27975897	Peak5889	1.59778	0.000403655	5.82733	3.85064	3.67005	EO_LC
chr11	39491997	39492397	Peak6103	0.924565	0.0114594	5.40417	4.79559	3.80077	EO_LC
chr11	45979806	45980206	Peak6200	0.752755	0.0341218	5.17142	4.25092	3.67005	EO_LC
chr11	52037596	52037996	Peak6358	0.797981	0.0213518	5.32037	5.3627	3.909	EO_LC
chr11	53886821	53887221	Peak6415	0.685021	0.040067	5.8007	4.04235	4.58737	EO_LC
chr11	5797421	5797821	Peak6519	0.708776	0.0281529	5.78971	5.12911	4.61434	EO_LC
chr11	72100664	72101064	Peak6968	1.81502	8.93451e-05	5.97871	3.68716	3.67798	EO_LC
chr11	76296716	76297116	Peak7095	0.782445	0.00790541	6.34603	5.99578	5.23973	EO_LC
chr11	78304237	78304637	Peak7183	0.650745	0.0284231	6.11528	6.20123	5.15718	EO_LC
chr11	79140589	79140989	Peak7210	1.05963	0.00635199	5.23167	5.34475	3.46338	EO_LC
chr11	80623478	80623878	Peak7252	0.739388	0.0354643	4.98992	5.01834	3.53269	EO_LC
chr11	87666443	87666843	Peak7429	0.641727	0.0333114	6.35193	6.10733	5.38946	EO_LC
chr11	88758966	88759366	Peak7486	0.615511	0.0483157	5.89941	5.38124	4.91908	EO_LC
chr11	95127857	95128257	Peak7595	0.948414	0.00422539	5.94634	5.67062	4.5501	EO_LC
chr12	102956639	102957039	Peak7925	0.713123	0.00915023	6.5959	6.51749	5.62465	EO_LC
chr12	103521121	103521521	Peak7940	0.86995	0.0128253	5.55866	4.84848	4.09788	EO_LC
chr12	104802987	104803387	Peak7979	1.28534	0.00215592	5.72601	3.7443	3.78078	EO_LC
chr12	109515632	109516032	Peak8083	0.740162	0.0235473	5.63021	5.82318	4.41927	EO_LC
chr12	112639668	112640068	Peak8191	0.659454	0.0486554	5.33679	5.25092	4.1256	EO_LC
chr12	113196266	113196666	Peak8224	0.913259	0.00740141	5.82698	5.08638	4.39539	EO_LC
chr12	118286053	118286453	Peak8329	0.712359	0.0043837	7.32326	5.92443	6.41571	EO_LC
chr12	118397840	118398240	Peak8331	0.690968	0.0431477	5.31988	4.28896	4.00968	EO_LC
chr12	118688564	118688964	Peak8336	0.709986	0.0393305	5.23035	4.59626	3.88362	EO_LC
chr12	119437137	119437537	Peak8350	0.86813	0.00113467	7.03154	6.18169	5.90608	EO_LC
chr12	120156305	120156705	Peak8364	0.964213	0.00756883	5.61864	4.65614	4.0514	EO_LC
chr12	120591202	120591602	Peak8367	0.797862	0.0219503	5.64367	4.62812	4.22896	EO_LC
chr12	31569291	31569691	Peak8563	0.767512	0.0333898	4.99023	4.17139	3.39057	EO_LC
chr12	31796137	31796537	Peak8567	0.952518	0.00947583	5.4847	4.53403	3.88362	EO_LC
chr12	45636908	45637308	Peak8723	0.744813	0.0399971	4.9871	3.4339	3.30366	EO_LC
chr12	55414135	55414535	Peak8804	0.634381	0.0279204	6.16334	7.01847	5.26295	EO_LC
chr12	60425142	60425542	Peak8881	1.07722	0.00304446	5.90943	4.43416	4.28959	EO_LC
chr12	63808155	63808555	Peak8887	0.809376	0.00369474	6.74625	5.76924	5.64191	EO_LC
chr12	66502904	66503304	Peak8901	1.05033	0.00337185	5.88781	4.5328	4.32034	EO_LC
chr12	71468616	71469016	Peak8951	0.770128	0.0093602	6.23074	6.07436	5.12057	EO_LC
chr12	71884794	71885194	Peak8956	0.677504	0.0397964	5.85347	4.62766	4.68588	EO_LC
chr12	80136386	80136786	Peak9143	0.650663	0.0269664	6.45357	5.06326	5.49396	EO_LC
chr12	83717764	83718164	Peak9257	0.848494	0.00637037	6.23819	5.72712	5.00107	EO_LC
chr12	87094282	87094682	Peak9349	1.54453	0.000547472	5.72732	3.6854	3.59883	EO_LC
chr12	88272316	88272716	Peak9399	0.700494	0.0221878	6.20293	5.58078	5.14941	EO_LC
chr12	99378108	99378508	Peak9476	0.614448	0.0288874	6.54438	6.03031	5.67889	EO_LC
chr13	103630075	103630475	Peak9549	1.59468	0.000204166	5.84046	4.87353	3.76596	EO_LC
chr13	107422776	107423176	Peak9595	0.953957	0.0163685	4.89808	3.79764	2.92243	EO_LC
chr13	108390644	108391044	Peak9608	0.871532	0.00676314	6.14453	5.32771	4.8286	EO_LC
chr13	109863509	109863909	Peak9634	0.717933	0.0388044	4.98836	5.38124	3.59044	EO_LC
chr13	11030269	11030669	Peak9642	0.673276	0.0477581	5.49804	4.25241	4.22896	EO_LC
chr13	115088014	115088414	Peak9755	1.49587	0.000324531	5.90007	4.68429	3.92243	EO_LC
chr13	119494566	119494966	Peak9791	1.11628	0.0025836	6.05358	4.3638	4.41581	EO_LC
chr13	15487073	15487473	Peak9852	0.933082	0.004319	5.97824	5.78346	4.61132	EO_LC
chr13	15851095	15851495	Peak9857	0.626083	0.0460885	5.89941	5.27065	4.88955	EO_LC
chr13	30172661	30173061	Peak10091	0.797265	0.00947583	6.34591	4.82398	5.16773	EO_LC
chr13	39919545	39919945	Peak10223	0.727712	0.0324635	5.52996	4.36408	4.20169	EO_LC
chr13	44659955	44660355	Peak10309	0.864291	0.0142989	5.61723	4.21002	4.13139	EO_LC
chr13	47319937	47320337	Peak10372	0.783946	0.0338864	4.70124	4.56656	2.93573	EO_LC
chr13	5184821	5185221	Peak10454	0.785604	0.0183979	5.77683	4.62697	4.47709	EO_LC
chr13	54710205	54710605	Peak10523	0.856358	0.011	5.71311	5.28939	4.35408	EO_LC
chr13	63196117	63196517	Peak10739	0.64933	0.0273939	6.30364	5.83608	5.34595	EO_LC
chr13	65360809	65361209	Peak10784	0.705341	0.031015	5.8023	4.74112	4.6237	EO_LC
chr13	72955169	72955569	Peak10874	0.674108	0.0394626	5.52867	5.54857	4.36754	EO_LC
chr13	73084873	73085273	Peak10876	1.64682	0.00055711	5.57342	3.56512	3.25429	EO_LC
chr13	89801262	89801662	Peak11053	0.776905	0.0260899	5.35375	4.65659	3.94234	EO_LC
chr13	91008794	91009194	Peak11068	1.01091	0.00116333	6.44432	5.56512	5.06578	EO_LC
chr13	94995117	94995517	Peak11116	0.733557	0.0235949	5.86331	4.92424	4.67798	EO_LC
chr14	102348262	102348662	Peak11292	0.771271	0.0256179	5.48293	4.36352	4.09195	EO_LC
chr14	107847439	107847839	Peak11344	1.42573	4.12837e-05	6.55971	5.04184	4.83667	EO_LC
chr14	122741197	122741597	Peak11485	1.57001	6.62091e-05	6.08454	5.45065	4.14863	EO_LC
chr14	12512680	12513080	Peak11520	0.876399	0.0196088	5.17252	3.99641	3.44489	EO_LC
chr14	15465129	15465529	Peak11560	0.913863	0.00933855	5.67138	5.23228	4.181	EO_LC
chr14	20680221	20680621	Peak11609	0.663137	0.0426541	5.65897	5.06275	4.5251	EO_LC
chr14	22669310	22669710	Peak11673	0.709943	0.0294774	5.6023	5.72862	4.41927	EO_LC
chr14	28005602	28006002	Peak11762	0.720386	0.0340485	5.37052	4.74176	4.0575	EO_LC
chr14	35428276	35428676	Peak11898	0.781171	0.0272446	5.29974	4.90006	3.82242	EO_LC
chr14	35705377	35705777	Peak11908	1.07171	0.00170067	6.40359	4.82358	4.90745	EO_LC
chr14	55418557	55418957	Peak12159	0.720451	0.0375092	5.25016	4.50125	3.86983	EO_LC
chr14	56582488	56582888	Peak12223	0.831445	0.0207577	5.30352	4.25033	3.77339	EO_LC
chr14	71022945	71023345	Peak12516	0.724775	0.011063	6.54385	5.99507	5.5311	EO_LC
chr14	75767209	75767609	Peak12559	1.10366	0.00175298	5.91174	5.43337	4.33914	EO_LC
chr14	76666861	76667261	Peak12584	0.62113	0.0239597	6.73325	6.15032	5.88876	EO_LC
chr14	77650482	77650882	Peak12610	0.659886	0.0406019	5.75183	5.30818	4.63377	EO_LC
chr14	78882419	78882819	Peak12625	0.752824	0.019106	5.91091	4.94876	4.70721	EO_LC
chr14	79027578	79027978	Peak12629	0.643503	0.0386092	6.05314	4.62628	5.03379	EO_LC
chr14	89724903	89725303	Peak12717	0.936325	0.00213553	6.46776	5.51712	5.18176	EO_LC
chr14	93342817	93343217	Peak12737	0.710358	0.0395276	5.4547	3.90063	4.086	EO_LC
chr14	97186387	97186787	Peak12753	0.755575	0.0333805	5.17169	4.50075	3.68588	EO_LC
chr14	98567199	98567599	Peak12754	0.683778	0.019842	6.42851	5.81006	5.44445	EO_LC
chr15	101855509	101855909	Peak12856	0.712276	0.0485548	4.43683	4.7407	2.69943	EO_LC
chr15	102615529	102615929	Peak12908	0.676736	0.0475132	5.43798	4.32856	4.14863	EO_LC
chr15	15547677	15548077	Peak13024	0.74944	0.0241069	5.73898	4.28954	4.47709	EO_LC
chr15	41780508	41780908	Peak13294	0.731554	0.0279414	5.7412	4.39874	4.49068	EO_LC
chr15	44946135	44946535	Peak13312	0.743934	0.0279221	5.77792	4.92499	4.48739	EO_LC
chr15	47402721	47403121	Peak13316	0.731413	0.037516	5.21347	4.12813	3.75099	EO_LC
chr15	50795189	50795589	Peak13327	0.664241	0.047935	5.54502	4.04201	4.31897	EO_LC
chr15	51128382	51128782	Peak13331	0.828849	0.0247216	5.13489	3.36435	3.47254	EO_LC
chr15	65581031	65581431	Peak13490	0.83949	0.0161962	5.63141	3.68496	4.19213	EO_LC
chr15	65757931	65758331	Peak13493	0.793085	0.00304446	6.8932	6.37172	5.85382	EO_LC
chr15	73518010	73518410	Peak13569	0.800047	0.0150141	5.79061	5.25167	4.50293	EO_LC
chr15	78694116	78694516	Peak13773	0.871433	0.0151412	5.30377	5.08588	3.78078	EO_LC
chr15	90013506	90013906	Peak14164	0.733621	0.0300511	5.72732	4.25211	4.43808	EO_LC
chr15	9769825	9770225	Peak14301	0.660644	0.0408453	6.00945	3.62766	4.89977	EO_LC
chr15	98735169	98735569	Peak14349	0.667229	0.0309289	5.96726	5.53293	4.93242	EO_LC
chr16	14557220	14557620	Peak14514	1.29779	0.00140765	5.83804	4.08622	3.95369	EO_LC
chr16	19083281	19083681	Peak14634	1.38923	0.000204166	6.33728	4.82198	4.57156	EO_LC
chr16	21321341	21321741	Peak14687	0.728542	0.0374398	5.15299	4.68496	3.73791	EO_LC
chr16	34112563	34112963	Peak14977	0.655349	0.0362141	6.03176	4.92312	4.98516	EO_LC
chr16	56071448	56071848	Peak15297	0.839735	0.0119054	5.87544	4.53379	4.52831	EO_LC
chr16	57473745	57474145	Peak15318	0.935341	0.0118539	5.55845	3.03994	3.91573	EO_LC
chr16	64723492	64723892	Peak15353	0.697396	0.0318973	5.86177	5.01799	4.70049	EO_LC
chr16	73096987	73097387	Peak15387	0.691184	0.026232	6.14397	4.68562	5.07263	EO_LC
chr16	82596692	82597092	Peak15435	0.721275	0.0448359	4.64565	4.74176	3.04694	EO_LC
chr16	83137513	83137913	Peak15436	0.754455	0.024944	5.63061	4.59556	4.32404	EO_LC
chr16	85080104	85080504	Peak15457	0.958245	0.00336463	6.183	4.76976	4.78714	EO_LC
chr16	88720328	88720728	Peak15515	1.0249	0.00256106	5.89941	5.83578	4.42871	EO_LC
chr16	90153666	90154066	Peak15529	0.693098	0.046137	5.3015	3.12846	3.91573	EO_LC
chr16	90299890	90300290	Peak15538	0.93538	0.00254394	6.47056	5.43364	5.15357	EO_LC
chr16	95988822	95989222	Peak15710	0.718992	0.020236	6.09525	5.01869	4.99154	EO_LC
chr17	14438554	14438954	Peak15825	0.915417	0.0056416	6.16293	5.25152	4.7991	EO_LC
chr17	22656953	22657353	Peak15935	0.93348	0.00394664	6.04332	5.76987	4.67295	EO_LC
chr17	30100701	30101101	Peak16317	0.729511	0.0269664	5.75293	4.84907	4.53388	EO_LC
chr17	34246380	34246780	Peak16485	0.689887	0.0288874	6.08469	4.25033	4.98922	EO_LC
chr17	37348232	37348632	Peak16649	0.721715	0.0276773	5.85038	5.04253	4.64706	EO_LC
chr17	43172954	43173354	Peak16674	0.709207	0.0116072	6.87426	4.87373	5.89342	EO_LC
chr17	48058099	48058499	Peak16848	0.790028	0.0189697	5.69819	4.84887	4.37244	EO_LC
chr17	50566822	50567222	Peak16910	0.846861	0.00781628	6.12533	5.12927	4.86382	EO_LC
chr17	5089471	5089871	Peak16914	0.637789	0.039934	5.89808	5.86165	4.88612	EO_LC
chr17	53218657	53219057	Peak16936	0.873913	0.0135296	5.58948	4.12943	4.09195	EO_LC
chr17	71214307	71214707	Peak17249	0.653053	0.0284714	6.27529	5.28939	5.30505	EO_LC
chr17	72043002	72043402	Peak17269	0.659004	0.0482692	5.5291	4.71493	4.33914	EO_LC
chr17	72828618	72829018	Peak17273	0.890616	0.0155603	5.38756	3.43337	3.77339	EO_LC
chr17	81035197	81035597	Peak17394	0.72974	0.0114477	6.84707	5.01869	5.82338	EO_LC
chr17	84249743	84250143	Peak17457	0.622921	0.0482714	5.86348	5.23107	4.86034	EO_LC
chr17	85340694	85341094	Peak17502	1.33785	0.00195431	5.63301	2.74303	3.59883	EO_LC
chr17	8601728	8602128	Peak17517	0.713645	0.0281389	5.76457	5.32771	4.58737	EO_LC
chr17	89105557	89105957	Peak17634	0.82117	0.00290212	6.686	6.03005	5.5868	EO_LC
chr17	89553163	89553563	Peak17637	0.912011	0.013912	5.35278	4.43469	3.71495	EO_LC
chr17	93875388	93875788	Peak17671	1.01771	0.00601454	5.8268	3.36104	4.19766	EO_LC
chr18	10866073	10866473	Peak17697	0.682688	0.0300621	5.84011	5.61135	4.75951	EO_LC
chr18	20513922	20514322	Peak17780	1.16666	0.00607039	5.24782	2.84946	3.19213	EO_LC
chr18	23973891	23974291	Peak17824	0.740566	0.0371424	5.05418	4.21155	3.55872	EO_LC
chr18	31440218	31440618	Peak17891	1.04479	0.00870718	5.19178	4.25092	3.33412	EO_LC
chr18	33476751	33477151	Peak17921	0.910719	0.0188608	5.05597	3.5632	3.181	EO_LC
chr18	34884281	34884681	Peak17965	0.981364	0.00816247	5.57301	4.89911	3.96198	EO_LC
chr18	38286792	38287192	Peak18132	0.679999	0.0338864	5.96805	4.16918	4.84632	EO_LC
chr18	38961829	38962229	Peak18160	0.654586	0.0430633	5.61784	5.53231	4.51627	EO_LC
chr18	42892713	42893113	Peak18203	0.678526	0.0440228	5.38875	4.7424	4.14291	EO_LC
chr18	43367020	43367420	Peak18206	1.39002	0.000132627	6.26727	5.27065	4.52069	EO_LC
chr18	46734670	46735070	Peak18244	0.802936	0.0163561	5.7781	5.08555	4.47377	EO_LC
chr18	52147928	52148328	Peak18294	0.662294	0.0470166	5.56055	4.21094	4.36262	EO_LC
chr18	56670745	56671145	Peak18336	0.829115	0.0200224	5.52824	3.99498	4.04079	EO_LC
chr18	57966275	57966675	Peak18360	0.991758	0.0110273	5.21186	3.796	3.40976	EO_LC
chr18	58193046	58193446	Peak18363	0.703813	0.0393516	5.38898	4.59626	4.08761	EO_LC
chr18	67524105	67524505	Peak18562	0.633826	0.0376906	6.13503	5.51798	5.15641	EO_LC
chr18	68091255	68091655	Peak18585	0.608087	0.0445943	6.09554	5.67073	5.17336	EO_LC
chr18	70540404	70540804	Peak18626	1.18498	0.00010079	6.71976	5.50113	5.24168	EO_LC
chr18	84938235	84938635	Peak18911	0.702252	0.0287166	5.95604	4.65502	4.81621	EO_LC
chr18	85672973	85673373	Peak18921	1.25767	9.19602e-05	6.77765	4.79518	5.22157	EO_LC
chr18	88757666	88758066	Peak18925	0.846657	0.0144231	5.72488	4.46643	4.30505	EO_LC
chr19	10204113	10204513	Peak18955	0.860474	0.0084979	6.01145	4.62674	4.69267	EO_LC
chr19	10982269	10982669	Peak18993	0.648715	0.04896	5.71198	4.56344	4.57041	EO_LC
chr19	12805430	12805830	Peak19018	1.17676	0.00457474	5.36932	4.17044	3.42871	EO_LC
chr19	16673661	16674061	Peak19042	0.810245	0.0197593	5.48536	4.71407	4.07564	EO_LC
chr19	18682493	18682893	Peak19054	0.646011	0.0441738	5.96758	4.74112	4.90407	EO_LC
chr19	36458858	36459258	Peak19277	1.50202	0.00140221	5.2862	4.53256	2.99704	EO_LC
chr19	41146080	41146480	Peak19397	0.774219	0.0267686	5.40464	4.25182	3.98602	EO_LC
chr19	46319221	46319621	Peak19642	0.685953	0.0348569	5.7533	4.71429	4.59044	EO_LC
chr19	47525149	47525549	Peak19720	0.747977	0.00817201	6.82045	5.72787	5.79363	EO_LC
chr19	4787556	4787956	Peak19738	0.662969	0.04445	5.76548	4.24883	4.603	EO_LC
chr19	55345904	55346304	Peak19866	1.01523	0.00449574	5.75275	5.12959	4.20317	EO_LC
chr19	56493941	56494341	Peak19897	0.691116	0.0439687	5.15466	5.06411	3.84374	EO_LC
chr19	6127860	6128260	Peak20029	0.72659	0.00437563	7.05209	6.73489	6.11367	EO_LC
chr2	106296132	106296532	Peak20271	1.00664	0.00635199	5.49958	4.99516	3.88362	EO_LC
chr2	106760455	106760855	Peak20282	0.665527	0.0341675	6.08293	4.62674	5.01908	EO_LC
chr2	11351200	11351600	Peak20337	0.923584	0.0136182	5.01084	5.65704	3.34413	EO_LC
chr2	119130518	119130918	Peak20451	0.697446	0.0416408	5.33728	4.94986	4.0222	EO_LC
chr2	121347743	121348143	Peak20528	0.960569	0.00927696	5.64545	4.12683	4.03462	EO_LC
chr2	124950961	124951361	Peak20583	0.80603	0.0218546	5.32112	4.84887	3.86983	EO_LC
chr2	127347581	127347981	Peak20632	0.87982	0.011	5.54395	5.64197	4.11553	EO_LC
chr2	134786350	134786750	Peak20809	1.05087	0.00269301	5.98976	4.71385	4.46003	EO_LC
chr2	13619219	13619619	Peak20830	0.932571	0.00613525	5.96758	4.17076	4.52831	EO_LC
chr2	143771206	143771606	Peak20889	1.02111	0.00271327	6.10472	4.68518	4.6102	EO_LC
chr2	152552609	152553009	Peak21091	0.708447	0.0154925	6.41287	5.3627	5.39122	EO_LC
chr2	157073876	157074276	Peak21271	1.46088	1.036e-06	6.97284	6.38131	5.30947	EO_LC
chr2	161013270	161013670	Peak21373	1.08137	0.00647713	5.24938	4.84848	3.43808	EO_LC
chr2	167404045	167404445	Peak21609	1.26929	0.000887953	5.77882	5.565	4.02843	EO_LC
chr2	168039416	168039816	Peak21638	0.920377	0.0032594	6.16417	5.82248	4.86034	EO_LC
chr2	172564578	172564978	Peak21771	0.746876	0.0248608	5.70048	4.62651	4.42272	EO_LC
chr2	179812333	179812733	Peak21910	1.46689	0.000307635	5.94473	4.59556	4.01596	EO_LC
chr2	180166954	180167354	Peak21928	0.64938	0.0329956	6.05448	5.62628	5.06054	EO_LC
chr2	180794926	180795326	Peak21959	0.762636	0.0229224	5.77593	4.7132	4.49068	EO_LC
chr2	180894533	180894933	Peak21965	0.67852	0.0490054	5.15494	4.5656	3.81524	EO_LC
chr2	180978464	180978864	Peak21969	0.678848	0.0384761	5.68658	4.84927	4.5295	EO_LC
chr2	23151961	23152361	Peak22089	0.762889	0.0354643	4.82733	4.39954	3.20317	EO_LC
chr2	28462909	28463309	Peak22250	0.673371	0.0218916	6.24068	6.16006	5.25694	EO_LC
chr2	34425829	34426229	Peak22535	0.774381	0.0218109	5.50002	5.45155	4.1754	EO_LC
chr2	4142779	4143179	Peak22659	2.04285	4.06352e-06	6.13419	5.08588	3.7303	EO_LC
chr2	50542728	50543128	Peak22720	0.971733	0.00269241	6.33581	4.87489	4.95131	EO_LC
chr2	58209977	58210377	Peak22797	0.85934	0.0100938	5.76603	5.23137	4.40976	EO_LC
chr2	63379924	63380324	Peak22901	1.03296	0.00549713	5.61662	4.39874	3.96671	EO_LC
chr2	65274964	65275364	Peak22919	0.80165	0.0227895	5.469	3.68584	4.01596	EO_LC
chr2	70457317	70457717	Peak22985	0.767357	0.0228616	5.72732	4.08555	4.42399	EO_LC
chr2	77424975	77425375	Peak23155	0.928044	0.00272917	6.36372	5.23167	5.0575	EO_LC
chr2	78122044	78122444	Peak23159	1.30973	0.000550029	6.09423	4.32715	4.32909	EO_LC
chr2	79687601	79688001	Peak23170	0.715883	0.0247974	5.86433	5.04115	4.71495	EO_LC
chr2	87963043	87963443	Peak23241	1.18348	0.00179885	5.95476	4.82158	4.25041	EO_LC
chr2	98684463	98684863	Peak23393	0.920872	0.00284757	6.43523	5.46733	5.13716	EO_LC
chr3	102992478	102992878	Peak23476	0.683343	0.0379259	5.73935	4.53256	4.54459	EO_LC
chr3	105804242	105804642	Peak23551	0.855812	0.00395948	6.37064	6.00724	5.17896	EO_LC
chr3	107615032	107615432	Peak23574	0.739916	0.0416952	4.72376	4.28896	3.03462	EO_LC
chr3	108659727	108660127	Peak23620	0.73784	0.0183979	6.10342	5.41589	4.95369	EO_LC
chr3	110650125	110650525	Peak23634	0.935174	0.00873311	5.74065	4.25092	4.20169	EO_LC
chr3	123393670	123394070	Peak23782	0.653362	0.0477581	5.52845	5.15008	4.38219	EO_LC
chr3	128930413	128930813	Peak23821	0.729621	0.029966	5.76293	3.99534	4.48616	EO_LC
chr3	138700757	138701157	Peak23977	0.873342	0.0218652	4.89841	4.08521	3.09195	EO_LC
chr3	141594373	141594773	Peak23988	0.708515	0.00936568	6.65124	6.57273	5.69463	EO_LC
chr3	142592908	142593308	Peak24004	1.75261	1.70885e-05	6.32062	4.08521	4.22896	EO_LC
chr3	145883668	145884068	Peak24065	0.626389	0.0241166	6.60948	6.21163	5.74447	EO_LC
chr3	145890916	145891316	Peak24066	1.34881	0.00147269	5.68658	3.4339	3.69943	EO_LC
chr3	146348227	146348627	Peak24078	0.735646	0.0262458	5.86211	4.92499	4.60604	EO_LC
chr3	151100619	151101019	Peak24110	1.10365	0.00180925	6.01161	4.92406	4.42272	EO_LC
chr3	151894657	151895057	Peak24122	0.741167	0.027922	5.4847	4.89873	4.18658	EO_LC
chr3	154702392	154702792	Peak24191	1.99993	2.16065e-05	6.01099	4.25033	3.57582	EO_LC
chr3	157595055	157595455	Peak24203	0.962799	0.0028672	6.35448	4.12781	4.98282	EO_LC
chr3	24905709	24906109	Peak24288	0.893836	0.00998224	5.75164	4.25062	4.29991	EO_LC
chr3	27305391	27305791	Peak24308	1.49374	0.00210752	5.17334	3.49975	2.74549	EO_LC
chr3	28642218	28642618	Peak24326	0.935839	0.00873311	5.71443	3.99534	4.18658	EO_LC
chr3	31304821	31305221	Peak24368	1.80185	1.51478e-05	6.25803	4.46669	4.10967	EO_LC
chr3	3977362	3977762	Peak24471	0.714289	0.0325553	5.61864	4.46746	4.35769	EO_LC
chr3	45905230	45905630	Peak24507	0.817487	0.0241179	5.17279	4.28867	3.60717	EO_LC
chr3	50932432	50932832	Peak24516	0.750595	0.0110883	6.43683	4.87392	5.35341	EO_LC
chr3	51131288	51131688	Peak24526	0.673371	0.03998	5.76493	4.04235	4.60717	EO_LC
chr3	51403008	51403408	Peak24540	0.614776	0.0456666	6.2683	4.89835	5.3178	EO_LC
chr3	62142681	62143081	Peak24657	0.696267	0.0131227	6.8139	6.56584	5.85382	EO_LC
chr3	67307741	67308141	Peak24704	0.604623	0.0422068	6.37894	5.67185	5.48164	EO_LC
chr3	85923413	85923813	Peak24877	0.950652	0.0124255	5.19395	4.43364	3.47254	EO_LC
chr3	87801269	87801669	Peak24948	1.08272	0.00285386	5.71179	5.5493	4.09788	EO_LC
chr3	9326580	9326980	Peak25153	0.678665	0.0424685	5.48404	4.84749	4.25959	EO_LC
chr3	9599724	9600124	Peak25251	0.644947	0.0489232	5.88982	4.43521	4.76596	EO_LC
chr4	119011511	119011911	Peak25788	0.657744	0.0333805	6.10414	4.89892	5.07182	EO_LC
chr4	128556484	128556884	Peak26075	1.15956	0.00049296	6.5086	5.80986	4.95934	EO_LC
chr4	129779496	129779896	Peak26146	0.657181	0.0191373	6.74532	5.10749	5.8349	EO_LC
chr4	131669371	131669771	Peak26206	0.889043	0.0131211	5.45153	4.97305	3.92243	EO_LC
chr4	138407417	138407817	Peak26563	0.653396	0.0486554	5.5448	4.62674	4.38704	EO_LC
chr4	142617474	142617874	Peak26761	0.802688	0.0272135	5.07361	4.08622	3.47254	EO_LC
chr4	144595988	144596388	Peak26787	0.685032	0.0364548	5.86416	3.74346	4.69659	EO_LC
chr4	150513539	150513939	Peak27028	0.734981	0.0193556	6.06319	5.68385	4.91573	EO_LC
chr4	16015256	16015656	Peak27239	1.5834	0.00051579	5.64565	4.50075	3.43556	EO_LC
chr4	16641916	16642316	Peak27242	0.745013	0.0392695	4.96615	3.21186	3.33412	EO_LC
chr4	16953789	16954189	Peak27244	0.648834	0.0480803	5.67449	4.7145	4.54577	EO_LC
chr4	21682454	21682854	Peak27276	0.699707	0.0336802	5.71292	4.12846	4.51184	EO_LC
chr4	21741152	21741552	Peak27280	0.918837	0.0155426	5.07361	4.43364	3.34413	EO_LC
chr4	21884778	21885178	Peak27285	0.673768	0.0482692	5.33802	4.21155	4.04528	EO_LC
chr4	22072046	22072446	Peak27290	0.654228	0.0148314	6.8154	6.01921	5.93694	EO_LC
chr4	26645441	26645841	Peak27323	1.02395	0.00113467	6.49936	5.08655	5.11553	EO_LC
chr4	32263415	32263815	Peak27339	0.955024	0.00439036	6.08381	4.6272	4.66206	EO_LC
chr4	35140065	35140465	Peak27408	0.729766	0.021457	6.05284	4.5656	4.90316	EO_LC
chr4	44486364	44486764	Peak27570	0.740732	0.030369	5.6708	4.43521	4.31897	EO_LC
chr4	45526727	45527127	Peak27606	0.654289	0.0244567	6.26701	6.11801	5.32472	EO_LC
chr4	54945510	54945910	Peak27737	1.11722	0.00515238	5.57425	3.94747	3.76052	EO_LC
chr4	62205886	62206286	Peak27892	0.810415	0.026843	5.19232	3.84867	3.58429	EO_LC
chr4	64899594	64899994	Peak27928	1.39316	0.000226263	6.09496	5.91296	4.28959	EO_LC
chr4	67683953	67684353	Peak27947	0.685128	0.04445	5.30301	4.5965	4.00337	EO_LC
chr4	8081727	8082127	Peak27997	0.724635	0.0351138	5.71141	3.21063	4.37376	EO_LC
chr4	82505245	82505645	Peak28023	0.758636	0.0112618	6.58669	6.06479	5.48616	EO_LC
chr4	96869686	96870086	Peak28177	0.875309	0.0131755	5.67274	3.28954	4.18658	EO_LC
chr4	99336892	99337292	Peak28227	0.796161	0.0162338	5.84029	4.39874	4.5501	EO_LC
chr5	100896301	100896701	Peak28260	0.88474	0.00946462	5.92102	4.08488	4.51184	EO_LC
chr5	102483879	102484279	Peak28299	0.661627	0.0483992	5.51452	4.12813	4.31016	EO_LC
chr5	104073224	104073624	Peak28322	1.32773	0.00205953	5.55824	3.94931	3.52391	EO_LC
chr5	104189393	104189793	Peak28330	0.71001	0.0220293	6.13461	4.6854	5.04304	EO_LC
chr5	108389855	108390255	Peak28420	0.790936	0.0256179	5.35521	4.32828	3.87674	EO_LC
chr5	109525439	109525839	Peak28451	1.02562	0.00164019	6.42839	4.04063	5.00738	EO_LC
chr5	111308531	111308931	Peak28506	0.622649	0.0247872	6.52985	6.36339	5.66552	EO_LC
chr5	112949902	112950302	Peak28548	0.71003	0.0339024	5.48359	4.97287	4.22896	EO_LC
chr5	130656268	130656668	Peak29156	0.726607	0.024525	6.01022	4.53158	4.82956	EO_LC
chr5	136677650	136678050	Peak29306	0.677445	0.0385854	5.57321	5.26992	4.41452	EO_LC
chr5	141059888	141060288	Peak29467	0.691065	0.025697	5.61622	7.02992	4.55442	EO_LC
chr5	141219784	141220184	Peak29474	0.870294	0.0129917	5.52953	4.8993	4.07564	EO_LC
chr5	143648435	143648835	Peak29522	0.652625	0.034323	5.98976	5.36297	4.97318	EO_LC
chr5	144148738	144149138	Peak29551	0.718416	0.0180668	5.99964	6.21163	4.91908	EO_LC
chr5	144328589	144328989	Peak29560	0.910901	0.0110888	5.74046	4.32601	4.22501	EO_LC
chr5	144845238	144845638	Peak29572	0.971262	0.00396885	6.02012	5.4672	4.58737	EO_LC
chr5	148105669	148106069	Peak29655	0.846948	0.011298	5.85296	4.74218	4.49845	EO_LC
chr5	148659863	148660263	Peak29672	0.838217	0.00925715	6.10573	4.82378	4.82599	EO_LC
chr5	150327019	150327419	Peak29739	0.971883	0.0034421	6.22982	4.94931	4.8198	EO_LC
chr5	16474607	16475007	Peak29790	1.01448	0.000124525	7.12877	6.08563	5.87156	EO_LC
chr5	17588038	17588438	Peak29792	1.00174	0.00121256	6.53006	4.8993	5.17896	EO_LC
chr5	21179011	21179411	Peak29840	0.649161	0.045076	5.82838	4.53354	4.73791	EO_LC
chr5	33861772	33862172	Peak30105	1.42629	0.00047432	5.83977	4.99463	3.92243	EO_LC
chr5	34265133	34265533	Peak30119	0.815815	0.0158493	5.65798	5.04115	4.31016	EO_LC
chr5	35341406	35341806	Peak30156	0.733278	0.0320405	5.30326	5.10667	3.96022	EO_LC
chr5	37293995	37294395	Peak30217	1.5376	0.000741406	5.58927	4.04028	3.41927	EO_LC
chr5	44260151	44260551	Peak30289	0.90031	0.00162712	6.67997	5.51736	5.47709	EO_LC
chr5	58124660	58125060	Peak30381	0.903837	0.0168502	5.1363	4.32799	3.40976	EO_LC
chr5	66542680	66543080	Peak30466	1.15746	0.000415236	6.54364	5.45013	5.01824	EO_LC
chr5	73267257	73267657	Peak30543	1.75964	9.89329e-05	5.7781	4.9716	3.54142	EO_LC
chr5	73628137	73628537	Peak30557	0.678804	0.029111	6.0218	5.21124	4.96435	EO_LC
chr5	77213552	77213952	Peak30630	0.828817	0.0289914	4.55887	4.08488	2.57352	EO_LC
chr5	9006551	9006951	Peak30713	0.805414	0.0208712	5.55908	4.04097	4.1256	EO_LC
chr5	93227018	93227418	Peak30768	0.815818	0.0198506	5.55908	4.3982	4.13296	EO_LC
chr5	96548650	96549050	Peak30791	1.06126	0.00895818	5.26353	4.28867	3.32404	EO_LC
chr5	97277054	97277454	Peak30798	1.24745	0.00243339	5.72451	3.36214	3.82242	EO_LC
chr5	97519106	97519506	Peak30802	1.24052	0.00248446	5.61764	3.74091	3.7303	EO_LC
chr6	101535816	101536216	Peak30861	0.789865	0.0130105	6.08308	5.34545	4.8559	EO_LC
chr6	104934135	104934535	Peak30872	1.58925	0.000488187	5.72582	3.74049	3.5501	EO_LC
chr6	10519628	10520028	Peak30873	2.25181	2.79173e-06	6.23858	3.79845	3.52391	EO_LC
chr6	106613850	106614250	Peak30876	0.686906	0.0429725	5.64545	4.25331	4.36262	EO_LC
chr6	115836894	115837294	Peak31027	0.68672	0.0319324	5.65838	5.7961	4.52831	EO_LC
chr6	119399125	119399525	Peak31095	1.01837	0.0016341	6.25738	5.48471	4.83571	EO_LC
chr6	120224942	120225342	Peak31117	0.750986	0.0243679	5.67235	4.87392	4.38573	EO_LC
chr6	122482954	122483354	Peak31176	0.820797	0.0145884	5.74046	5.1504	4.38573	EO_LC
chr6	122729957	122730357	Peak31195	1.30386	0.0032377	5.32062	3.79437	3.16979	EO_LC
chr6	127029959	127030359	Peak31307	0.681621	0.0194926	6.50598	5.30775	5.5201	EO_LC
chr6	127080403	127080803	Peak31312	0.700237	0.0345916	5.67371	4.62697	4.46462	EO_LC
chr6	12765424	12765824	Peak31330	0.722756	0.0274398	5.68677	4.82278	4.47254	EO_LC
chr6	12785059	12785459	Peak31338	0.805644	0.0183979	5.51452	5.01816	4.13716	EO_LC
chr6	128246398	128246798	Peak31355	1.14188	0.00264584	5.72563	4.56464	4.00968	EO_LC
chr6	136617258	136617658	Peak31492	0.796772	0.0232333	5.31988	4.71385	3.88362	EO_LC
chr6	140393493	140393893	Peak31539	0.836616	0.00810817	6.25647	5.34587	4.99704	EO_LC
chr6	144309809	144310209	Peak31608	0.664669	0.0233676	6.55101	5.26918	5.58469	EO_LC
chr6	18435087	18435487	Peak31727	2.08871	1.70095e-06	6.40312	3.94747	3.96022	EO_LC
chr6	24728972	24729372	Peak31771	1.51087	0.00162973	5.45063	2.50125	3.08002	EO_LC
chr6	28500683	28501083	Peak31791	0.965492	0.00819432	5.55866	5.10601	3.96671	EO_LC
chr6	48626128	48626528	Peak32135	0.984082	0.0134205	5.03267	4.08755	3.11553	EO_LC
chr6	54914750	54915150	Peak32281	1.20451	0.00289771	5.63161	3.8471	3.76596	EO_LC
chr6	5526867	5527267	Peak32290	0.685542	0.0333114	5.82803	4.92499	4.69659	EO_LC
chr6	58248480	58248880	Peak32320	0.790413	0.0157724	5.89924	4.5	4.63079	EO_LC
chr6	63078738	63079138	Peak32354	1.82859	6.22741e-05	6.00899	4.28954	3.71495	EO_LC
chr6	65546909	65547309	Peak32376	0.970792	0.00399921	6.10573	4.32573	4.66606	EO_LC
chr6	68763311	68763711	Peak32418	0.716947	0.0374615	5.32062	4.25122	3.96022	EO_LC
chr6	70871687	70872087	Peak32433	0.906561	0.00740141	5.9436	4.94913	4.53269	EO_LC
chr6	96996516	96996916	Peak32916	0.707133	0.037516	5.31814	5.25018	4.0222	EO_LC
chr6	99665063	99665463	Peak32965	0.695156	0.0396866	5.56097	4.08622	4.27919	EO_LC
chr7	101793340	101793740	Peak32978	1.30224	0.00235277	5.5448	3.74346	3.53269	EO_LC
chr7	106738540	106738940	Peak33094	0.750858	0.0269424	5.57342	4.6854	4.23828	EO_LC
chr7	108815177	108815577	Peak33168	0.853547	0.00720305	6.04226	5.65659	4.76968	EO_LC
chr7	108971709	108972109	Peak33175	0.842304	0.00311238	6.38815	6.64112	5.23362	EO_LC
chr7	125755425	125755825	Peak33475	0.718381	0.0390346	5.35569	3.84828	3.94056	EO_LC
chr7	130394918	130395318	Peak33568	0.661312	0.0486554	5.5901	4.62444	4.38219	EO_LC
chr7	138847806	138848206	Peak33808	1.54569	0.000600511	5.68639	4.3649	3.54142	EO_LC
chr7	141464077	141464477	Peak33861	1.11737	0.00163505	6.13489	4.71493	4.55872	EO_LC
chr7	142602085	142602485	Peak33874	0.640841	0.0484933	5.69972	4.7424	4.60717	EO_LC
chr7	148559503	148559903	Peak34014	0.659491	0.049163	5.59092	4.25092	4.39187	EO_LC
chr7	150293024	150293424	Peak34067	0.910997	0.0116072	5.37052	5.10766	3.81524	EO_LC
chr7	150474951	150475351	Peak34070	0.684224	0.0403631	5.71179	4.3638	4.50414	EO_LC
chr7	152007836	152008236	Peak34118	0.846685	0.0103059	6.02012	4.74197	4.70049	EO_LC
chr7	25063810	25064210	Peak34341	1.0422	0.0073361	5.66112	3.74091	3.91754	EO_LC
chr7	31613883	31614283	Peak34695	1.66932	0.000215207	6.0133	3.50276	3.81524	EO_LC
chr7	34954398	34954798	Peak34742	0.711879	0.024999	5.88798	5.5015	4.75951	EO_LC
chr7	36147416	36147816	Peak34794	0.776768	0.0321763	4.94521	4.12878	3.33412	EO_LC
chr7	36471745	36472145	Peak34812	0.659537	0.0465037	5.43592	5.23092	4.27013	EO_LC
chr7	38627183	38627583	Peak34838	0.748858	0.0231063	5.51431	5.86155	4.2806	EO_LC
chr7	49711244	49711644	Peak34938	0.738223	0.0345881	5.24782	4.12911	3.82242	EO_LC
chr7	59425464	59425864	Peak35220	0.746473	0.0151883	6.294	4.17139	5.17055	EO_LC
chr7	64431364	64431764	Peak35263	0.819685	0.00466092	6.61673	5.28997	5.47937	EO_LC
chr7	71041843	71042243	Peak35320	0.667858	0.0183979	6.55971	6.18177	5.6252	EO_LC
chr7	73018414	73018814	Peak35366	0.690758	0.00290212	7.42112	6.3629	6.56934	EO_LC
chr7	73636386	73636786	Peak35375	0.894024	0.017914	5.1926	3.56464	3.44489	EO_LC
chr7	75309805	75310205	Peak35398	1.09143	0.00708955	5.37387	4.0427	3.47254	EO_LC
chr7	75420748	75421148	Peak35401	0.867011	0.00768442	6.08483	5.13008	4.76596	EO_LC
chr7	84883689	84884089	Peak35478	0.87067	0.00810817	6.08513	4.04201	4.75201	EO_LC
chr7	86063531	86063931	Peak35489	0.86773	0.0100938	5.91239	4.68584	4.52391	EO_LC
chr7	90002856	90003256	Peak35651	0.693234	0.0425733	5.32087	4.43311	4.00337	EO_LC
chr7	91396619	91397019	Peak35671	1.22872	0.000208507	6.55918	4.76851	4.98196	EO_LC
chr7	95278608	95279008	Peak35691	1.46651	0.000190818	6.22876	4.84946	4.35902	EO_LC
chr7	96465514	96465914	Peak35695	0.702561	0.0497489	5.05179	3.74049	3.46586	EO_LC
chr7	96781108	96781508	Peak35701	0.757369	0.0253691	5.54268	5.1706	4.22355	EO_LC
chr8	10007246	10007646	Peak35735	0.683307	0.0263715	6.16362	5.04166	5.11844	EO_LC
chr8	101039185	101039585	Peak35736	0.729334	0.0232333	6.06497	4.97269	4.90407	EO_LC
chr8	103411420	103411820	Peak35748	1.29587	0.00369474	5.28442	2.85025	3.09195	EO_LC
chr8	103464849	103465249	Peak35751	0.941779	0.00952733	5.7386	3.74261	4.17692	EO_LC
chr8	107219267	107219667	Peak35793	0.745247	0.0289827	5.52888	4.74324	4.19213	EO_LC
chr8	107902765	107903165	Peak35821	0.718341	0.0267686	5.72601	5.43456	4.54577	EO_LC
chr8	109127122	109127522	Peak35908	0.889145	0.000455751	6.95612	7.04675	5.84679	EO_LC
chr8	113278659	113279059	Peak36046	0.89192	0.00317016	6.43557	5.50075	5.18658	EO_LC
chr8	114145889	114146289	Peak36085	0.602856	0.0269664	6.78918	6.15998	5.96833	EO_LC
chr8	116923249	116923649	Peak36167	0.903343	0.0114551	5.91025	3.50276	4.37111	EO_LC
chr8	116992645	116993045	Peak36169	1.06397	0.00369474	6.00945	3.84986	4.39669	EO_LC
chr8	121990052	121990452	Peak36275	0.625416	0.0416278	5.96995	6.50908	5.00423	EO_LC
chr8	123640238	123640638	Peak36374	0.703123	0.0220717	6.09641	5.88695	5.03153	EO_LC
chr8	124365149	124365549	Peak36419	0.604231	0.0437891	6.15536	5.88734	5.24969	EO_LC
chr8	126740887	126741287	Peak36558	1.10039	0.000351552	6.76439	4.17013	5.34164	EO_LC
chr8	128869065	128869465	Peak36639	0.604961	0.0492986	6.08337	5.71461	5.13716	EO_LC
chr8	129134493	129134893	Peak36656	0.881232	0.0087897	5.8282	4.9716	4.45079	EO_LC
chr8	15519730	15520130	Peak36781	1.94499	2.82835e-06	6.23924	5.56524	3.98602	EO_LC
chr8	18187538	18187938	Peak36796	0.750843	0.0124513	6.22047	5.78294	5.11473	EO_LC
chr8	25672253	25672653	Peak36915	1.53362	0.000128292	6.16528	4.36242	4.22355	EO_LC
chr8	26479264	26479664	Peak36941	1.30697	0.00271327	5.17307	5.06411	3.09195	EO_LC
chr8	27558481	27558881	Peak36986	0.70962	0.0214554	6.21106	4.5328	5.12638	EO_LC
chr8	28568129	28568529	Peak37021	0.926655	0.00948142	5.4998	4.92387	3.96671	EO_LC
chr8	35142576	35142976	Peak37122	0.794217	0.00359961	6.93823	5.27036	5.87846	EO_LC
chr8	37295792	37296192	Peak37187	0.786302	0.0240112	5.4366	4.46669	4.02843	EO_LC
chr8	4481560	4481960	Peak37313	0.862568	0.0112064	5.95636	3.79437	4.55756	EO_LC
chr8	44876867	44877267	Peak37315	0.82869	0.0228234	5.28442	3.94858	3.68375	EO_LC
chr8	46321830	46322230	Peak37340	0.674759	0.0140989	6.68045	5.86155	5.75713	EO_LC
chr8	49837329	49837729	Peak37465	0.911996	0.00780792	5.83977	4.53256	4.40499	EO_LC
chr8	49928292	49928692	Peak37467	0.688383	0.00947583	6.94951	6.67869	6.03884	EO_LC
chr8	5350776	5351176	Peak37481	0.703134	0.0406019	5.48492	3.4318	4.15434	EO_LC
chr8	55702241	55702641	Peak37503	0.684265	0.0134755	6.7192	5.89987	5.77289	EO_LC
chr8	68142101	68142501	Peak37664	0.971289	0.00179885	6.3799	5.12862	5.03688	EO_LC
chr8	69306559	69306959	Peak37674	1.48443	0.000451813	5.92134	3.68451	3.92243	EO_LC
chr8	75079701	75080101	Peak37945	1.2015	0.000309416	6.45357	4.94858	4.88955	EO_LC
chr8	75200765	75201165	Peak37948	1.22769	0.000313678	6.42036	4.5005	4.82599	EO_LC
chr8	77504367	77504767	Peak37972	0.705626	0.0177889	6.2486	5.74134	5.21612	EO_LC
chr8	77549900	77550300	Peak37977	1.06701	0.000677758	6.52215	4.84887	5.10379	EO_LC
chr8	79709882	79710282	Peak37997	1.0578	0.00457786	5.75146	4.3982	4.07402	EO_LC
chr8	80791897	80792297	Peak38029	1.03871	0.000822705	6.23937	6.51743	4.85334	EO_LC
chr8	85560662	85561062	Peak38116	1.27301	0.000861171	6.05373	4.04028	4.2844	EO_LC
chr8	85916426	85916826	Peak38127	0.784564	0.0237278	5.42245	4.82258	4.02843	EO_LC
chr8	86800724	86801124	Peak38200	0.797928	0.021332	5.60128	4.76934	4.21413	EO_LC
chr8	91063904	91064304	Peak38386	0.67587	0.0418152	5.55845	5.10782	4.34777	EO_LC
chr8	94446116	94446516	Peak38470	0.739345	0.0194047	6.00165	5.41563	4.83571	EO_LC
chr8	95965861	95966261	Peak38498	0.91446	0.00160463	6.80195	4.74197	5.57679	EO_LC
chr8	96707061	96707461	Peak38514	0.832105	0.00298939	6.52964	6.37227	5.4026	EO_LC
chr8	98439957	98440357	Peak38601	0.615869	0.044873	6.03161	5.62628	5.0688	EO_LC
chr9	101852365	101852765	Peak38634	0.869324	0.0148516	5.38922	4.82278	3.87674	EO_LC
chr9	102910416	102910816	Peak38659	0.71566	0.0311366	5.60373	4.79662	4.35769	EO_LC
chr9	104239865	104240265	Peak38693	0.700657	0.0165859	6.31109	5.84838	5.29734	EO_LC
chr9	108655419	108655819	Peak38847	1.0481	0.00290212	6.05254	4.12781	4.50293	EO_LC
chr9	10904803	10905203	Peak38866	0.761114	0.0261149	5.4998	4.5015	4.15434	EO_LC
chr9	111294712	111295112	Peak38941	0.687355	0.0445943	5.35351	4.62628	4.02675	EO_LC
chr9	111389217	111389617	Peak38943	2.28514	1.40623e-08	6.63875	4.77018	4.0575	EO_LC
chr9	111782317	111782717	Peak38951	1.4036	0.00216594	5.32087	3.5656	3.10379	EO_LC
chr9	114523484	114523884	Peak39007	0.69754	0.0338864	5.69972	4.5015	4.49845	EO_LC
chr9	120920614	120921014	Peak39162	0.718506	0.04445	4.67177	4.97251	3.10379	EO_LC
chr9	122108340	122108740	Peak39206	0.834386	0.0136077	5.72657	5.06411	4.34777	EO_LC
chr9	21259752	21260152	Peak39378	0.920083	0.00622001	6.04256	4.28838	4.64301	EO_LC
chr9	30257422	30257822	Peak39486	0.69366	0.041717	5.38638	4.89968	4.07402	EO_LC
chr9	33336176	33336576	Peak39545	0.977597	0.0100881	5.37243	4.04166	3.67005	EO_LC
chr9	3439585	3439985	Peak39551	0.601321	0.0484977	6.23963	5.01974	5.31203	EO_LC
chr9	34803420	34803820	Peak39557	1.02444	0.00389416	5.85073	4.76914	4.29991	EO_LC
chr9	3563101	3563501	Peak39577	0.713218	0.0160358	6.30238	5.51674	5.25959	EO_LC
chr9	39203650	39204050	Peak39633	0.984113	0.00351134	6.02134	4.89968	4.57467	EO_LC
chr9	42706425	42706825	Peak39709	1.54298	3.17105e-05	6.37195	5.64026	4.51627	EO_LC
chr9	56757784	56758184	Peak40028	0.688224	0.0416408	5.57363	4.56656	4.32034	EO_LC
chr9	61726717	61727117	Peak40181	0.672302	0.0404957	5.70048	4.87276	4.53706	EO_LC
chr9	69516505	69516905	Peak40384	1.35579	0.00422573	4.85176	4.04028	2.36395	EO_LC
chr9	75862755	75863155	Peak40515	0.733131	0.0172149	6.15383	5.28983	5.04611	EO_LC
chr9	76249772	76250172	Peak40519	0.798603	0.0103639	6.27491	5.14864	5.07483	EO_LC
chr9	81931149	81931549	Peak40614	0.849892	0.0173365	5.45221	4.5328	3.95546	EO_LC
chr9	87038975	87039375	Peak40677	0.862993	0.00456349	6.40312	5.53342	5.17896	EO_LC
chr9	94562155	94562555	Peak40735	1.65248	4.77455e-06	6.65818	5.0636	4.74824	EO_LC
chr9	96387971	96388371	Peak40769	0.859399	0.00647713	6.44443	3.62812	5.18176	EO_LC
chr9	97753229	97753629	Peak40801	0.813343	0.0108526	5.96742	5.57983	4.7303	EO_LC
chr9	98333532	98333932	Peak40804	0.748662	0.0263931	5.52888	4.89892	4.22896	EO_LC
chrX	136990888	136991288	Peak41005	0.914387	0.0120905	5.40441	4.82378	3.82956	EO_LC
chrX	137077446	137077846	Peak41008	0.670304	0.0460885	5.40417	4.76955	4.16979	EO_LC
chrX	141939588	141939988	Peak41025	0.613418	0.0497489	5.80284	5.78232	4.82242	EO_LC
chrX	143649771	143650171	Peak41027	1.2442	0.00515238	5.13461	3.21247	2.89545	EO_LC
chrX	143688088	143688488	Peak41028	0.935577	0.0114594	5.73898	2.73793	4.12136	EO_LC
chrX	159194023	159194423	Peak41119	0.745444	0.0236823	5.66053	5.61158	4.4334	EO_LC
chrX	165474451	165474851	Peak41159	0.630589	0.0388007	6.05284	5.58078	5.08382	EO_LC
chrX	23531244	23531644	Peak41199	0.946315	0.00448309	6.00041	5.1706	4.58201	EO_LC
chrX	36192500	36192900	Peak41231	1.15254	0.00581619	5.17526	4.39981	3.181	EO_LC
chrX	49518428	49518828	Peak41285	0.627362	0.0391543	6.01161	6.11826	5.03913	EO_LC
chr1	104161043	104161443	Peak18	-1.27572	0.000106208	4.82942	6.21163	6.42603	LO_EC
chr1	104200079	104200479	Peak19	-1.04793	0.0127781	2.26714	4.21094	4.54577	LO_EC
chr1	108713390	108713790	Peak59	-0.810701	0.0279945	3.4728	3.43337	5.16849	LO_EC
chr1	114676296	114676696	Peak83	-0.846041	0.0165944	4.03267	4.12781	5.51406	LO_EC
chr1	115854642	115855042	Peak85	-0.741892	0.0302863	4.15606	4.25033	5.50799	LO_EC
chr1	121202027	121202427	Peak140	-0.959681	2.29765e-05	6.14411	7.92124	7.27728	LO_EC
chr1	121765456	121765856	Peak160	-2.55548	1.69174e-05	1.94778	5.12846	5.4491	LO_EC
chr1	12577046	12577446	Peak193	-0.67641	0.0430763	4.30452	5.12927	5.51508	LO_EC
chr1	12682280	12682680	Peak197	-0.918645	0.00174563	5.32013	6.58166	6.56186	LO_EC
chr1	129472320	129472720	Peak231	-0.977329	0.0131211	3.03449	4.65637	4.90654	LO_EC
chr1	132196661	132197061	Peak270	-1.16784	0.00533207	0	4.79641	4.25429	LO_EC
chr1	133834134	133834534	Peak313	-0.741398	0.0331306	3.98992	4.65704	5.40149	LO_EC
chr1	134288179	134288579	Peak344	-0.891879	0.0032377	4.89941	6.32672	6.14968	LO_EC
chr1	134980797	134981197	Peak371	-0.633551	0.0407055	5.0093	5.50025	6.00696	LO_EC
chr1	135959612	135960012	Peak419	-0.915151	0.00108047	5.13518	7.34076	6.33914	LO_EC
chr1	136223433	136223833	Peak431	-1.66747	0.00123022	2.41118	4.94692	5.04528	LO_EC
chr1	136431650	136432050	Peak444	-0.686014	0.0249931	5.19259	4.53256	6.24338	LO_EC
chr1	139070679	139071079	Peak559	-0.926304	0.000218288	5.99964	6.39008	7.14935	LO_EC
chr1	139275149	139275549	Peak561	-1.02709	0.00810817	3.53103	5.10881	5.30061	LO_EC
chr1	140468192	140468592	Peak566	-0.845555	0.0167997	3.89708	5.08638	5.38462	LO_EC
chr1	145549878	145550278	Peak601	-1.08991	4.22207e-05	5.64466	6.94876	6.96671	LO_EC
chr1	152933559	152933959	Peak633	-0.783159	0.0209988	4.3015	4.32686	5.6384	LO_EC
chr1	152950126	152950526	Peak634	-0.839847	0.0254321	3.11399	3.94747	4.88705	LO_EC
chr1	152957594	152957994	Peak635	-0.942349	0.0117802	3.64406	4.71493	5.30761	LO_EC
chr1	153097954	153098354	Peak642	-0.951791	0.00574955	4.30201	5.04132	5.76782	LO_EC
chr1	153726586	153726986	Peak662	-0.794712	0.0173365	4.40604	5.01956	5.7188	LO_EC
chr1	154137959	154138359	Peak666	-1.58343	0.00184793	2.26714	4.08521	4.92243	LO_EC
chr1	154962481	154962881	Peak703	-1.05533	0.00624285	3.70048	4.08555	5.44382	LO_EC
chr1	155223627	155224027	Peak714	-0.696566	0.0151412	5.89824	5.78428	6.88184	LO_EC
chr1	155261259	155261659	Peak717	-1.70524	0.000596752	2.84866	4.65569	5.29476	LO_EC
chr1	155379590	155379990	Peak723	-0.704885	0.0241623	4.67255	6.0858	5.77709	LO_EC
chr1	156930587	156930987	Peak751	-0.683886	0.0345552	4.23246	6.4341	5.37976	LO_EC
chr1	158590380	158590780	Peak791	-0.748776	0.0333805	3.64327	4.68496	5.10084	LO_EC
chr1	158649037	158649437	Peak795	-0.613855	0.0266599	5.80372	6.72669	6.65028	LO_EC
chr1	16283946	16284346	Peak846	-1.05288	0.0131211	1.27331	5.08588	4.04528	LO_EC
chr1	163888285	163888685	Peak865	-0.729407	0.0352363	3.75109	5.17123	5.13139	LO_EC
chr1	165949900	165950300	Peak888	-0.682354	0.0494051	3.702	4.43364	5.07483	LO_EC
chr1	165950928	165951328	Peak889	-0.950881	0.00518042	4.43958	5.7145	5.88705	LO_EC
chr1	168055305	168055705	Peak941	-0.612808	0.00187562	7.193	7.83254	7.89985	LO_EC
chr1	168065135	168065535	Peak942	-1.33819	0.00211329	3.4728	3.79682	5.5289	LO_EC
chr1	168072575	168072975	Peak943	-1.06907	0.000910288	5.05149	4.7424	6.49876	LO_EC
chr1	168870260	168870660	Peak956	-0.699597	0.0482692	3.26611	4.68451	4.77339	LO_EC
chr1	168930890	168931290	Peak958	-0.713026	0.0337842	4.15717	5.87498	5.4334	LO_EC
chr1	169214983	169215383	Peak966	-0.674288	0.00800419	5.93284	7.19114	6.80694	LO_EC
chr1	177944024	177944424	Peak1148	-0.708998	0.0323669	4.46653	4.46797	5.69463	LO_EC
chr1	179485899	179486299	Peak1162	-1.11995	0.00647713	3.03328	5.21078	4.98282	LO_EC
chr1	180267754	180268154	Peak1177	-0.817271	0.00215592	5.7373	7.00755	6.80851	LO_EC
chr1	181889901	181890301	Peak1216	-2.31923	2.7027e-07	3.33409	6.38103	6.03646	LO_EC
chr1	183186888	183187288	Peak1273	-0.699331	0.0309132	4.37123	5.74187	5.53269	LO_EC
chr1	183950060	183950460	Peak1290	-1.32339	0.00018046	4.50177	6.0959	6.18797	LO_EC
chr1	184033539	184033939	Peak1295	-0.614766	0.0287857	5.77647	5.68551	6.63969	LO_EC
chr1	184227333	184227733	Peak1304	-1.07128	0.01217	2.12085	4.25122	4.51627	LO_EC
chr1	184419910	184420310	Peak1308	-0.656115	0.0458945	4.26456	5.71375	5.41214	LO_EC
chr1	184458550	184458950	Peak1311	-0.901005	0.0109151	3.94714	5.28939	5.44382	LO_EC
chr1	184838540	184838940	Peak1320	-0.913066	0.0219418	1.7599	5.5328	4.06799	LO_EC
chr1	186320899	186321299	Peak1329	-0.62057	0.0317268	5.43592	6.07495	6.33069	LO_EC
chr1	188085342	188085742	Peak1363	-0.626385	0.033861	5.4847	4.50075	6.40976	LO_EC
chr1	190608965	190609365	Peak1384	-0.752429	0.0393429	3.11284	3.79396	4.83925	LO_EC
chr1	190837207	190837607	Peak1388	-0.619899	0.0274398	5.55887	6.46791	6.42925	LO_EC
chr1	191740349	191740749	Peak1410	-0.908969	0.00269301	4.85176	6.71418	6.12097	LO_EC
chr1	191901230	191901630	Peak1414	-0.721887	0.0443344	3.19585	4.29041	4.79811	LO_EC
chr1	194621137	194621537	Peak1485	-0.7558	0.0316754	3.52501	5.91164	4.98922	LO_EC
chr1	195208636	195209036	Peak1498	-0.930904	0.0131755	3.4037	5.25182	5.08978	LO_EC
chr1	20857514	20857914	Peak1531	-0.656785	0.0136445	5.88881	6.43377	6.76715	LO_EC
chr1	20898680	20899080	Peak1533	-1.39733	0.000900542	3.64565	5.01974	5.61697	LO_EC
chr1	3052854	3053254	Peak1574	-0.953092	0.0147973	3.19585	4.04167	5.05832	LO_EC
chr1	33678645	33679045	Peak1590	-0.798829	0.0151412	4.46788	6.05396	5.74962	LO_EC
chr1	34001806	34002206	Peak1602	-0.626301	0.028702	5.45153	6.64896	6.35036	LO_EC
chr1	34063797	34064197	Peak1604	-0.708572	0.0136617	5.09452	7.04141	6.0964	LO_EC
chr1	34293163	34293563	Peak1618	-0.634297	0.0403631	4.67255	6.58783	5.66552	LO_EC
chr1	3661470	3661870	Peak1675	-1.64222	0.000124016	3.46832	6.51649	5.55814	LO_EC
chr1	36748083	36748483	Peak1682	-0.612378	0.0354754	5.35593	6.39056	6.24569	LO_EC
chr1	37019661	37020061	Peak1695	-0.786335	0.0269664	3.75036	4.21063	5.24969	LO_EC
chr1	37043631	37044031	Peak1698	-0.756074	0.0151892	4.77683	6.01921	5.93031	LO_EC
chr1	38186550	38186950	Peak1728	-0.84998	0.00242635	5.38709	7.1437	6.5311	LO_EC
chr1	39711820	39712220	Peak1765	-0.746191	0.041653	2.85553	3.50175	4.67402	LO_EC
chr1	46706643	46707043	Peak1829	-1.04418	0.00515238	3.80212	5.12894	5.4617	LO_EC
chr1	52488694	52489094	Peak1876	-0.890441	0.012405	3.85416	5.41616	5.3682	LO_EC
chr1	52994803	52995203	Peak1886	-0.884928	0.0240112	2.53017	2.62812	4.67402	LO_EC
chr1	54541716	54542116	Peak1909	-0.848521	0.0041291	5.3	6.1496	6.4915	LO_EC
chr1	54642320	54642720	Peak1911	-1.29439	0.00171457	3.702	4.74303	5.61076	LO_EC
chr1	54733744	54734144	Peak1912	-0.693649	0.0468858	3.80284	4.36325	5.21686	LO_EC
chr1	55420265	55420665	Peak1927	-0.636137	0.0397964	4.9671	6.0747	5.95815	LO_EC
chr1	55462489	55462889	Peak1929	-0.887158	0.00353261	4.82663	6.54899	6.07783	LO_EC
chr1	58026782	58027182	Peak1944	-0.720552	0.0114594	5.37028	6.6998	6.38704	LO_EC
chr1	58818677	58819077	Peak1958	-0.696357	0.0163316	5.60393	5.59732	6.60196	LO_EC
chr1	58825940	58826340	Peak1959	-0.711117	0.043766	3.80213	4.17013	5.2839	LO_EC
chr1	58946658	58947058	Peak1962	-0.910457	0.0109151	3.98867	4.71407	5.51849	LO_EC
chr1	59538713	59539113	Peak1980	-0.689727	0.00367553	6.13475	7.57664	6.99552	LO_EC
chr1	59820149	59820549	Peak1995	-0.841696	0.00285107	5.32037	6.72013	6.4594	LO_EC
chr1	60237057	60237457	Peak2000	-0.679217	0.00228153	6.42908	7.8094	7.25151	LO_EC
chr1	63256675	63257075	Peak2048	-0.699392	0.0271256	4.72451	5.58054	5.84102	LO_EC
chr1	63272443	63272843	Peak2050	-0.722982	0.0454702	3.12199	4.43285	4.80175	LO_EC
chr1	63319603	63320003	Peak2053	-0.909151	0.0049226	4.43592	6.62663	5.78446	LO_EC
chr1	63492276	63492676	Peak2057	-1.23054	7.56747e-05	4.89874	6.78979	6.42367	LO_EC
chr1	64780121	64780521	Peak2081	-0.656338	0.0297367	4.9671	6.20146	5.96228	LO_EC
chr1	64784128	64784528	Peak2082	-0.803025	0.000450467	6.28404	7.6191	7.26109	LO_EC
chr1	7116024	7116424	Peak2125	-0.688182	0.024245	5.15216	6.08672	6.1983	LO_EC
chr1	7119898	7120298	Peak2126	-1.62684	3.56364e-05	4.23035	5.32616	6.20692	LO_EC
chr1	72229635	72230035	Peak2140	-0.670647	0.0455525	4.30402	4.43232	5.52451	LO_EC
chr1	72258680	72259080	Peak2142	-0.639639	0.0381088	4.9465	6.19169	5.95011	LO_EC
chr1	72275575	72275975	Peak2146	-0.640283	0.0305538	5.33532	5.96059	6.2838	LO_EC
chr1	7289348	7289748	Peak2170	-2.31557	3.37721e-05	2.4037	4.46771	5.48842	LO_EC
chr1	7299306	7299706	Peak2176	-0.708235	0.0470051	3.1926	4.53403	4.74824	LO_EC
chr1	7388006	7388406	Peak2181	-0.643375	0.00900655	6.45153	7.42588	7.2721	LO_EC
chr1	74443847	74444247	Peak2207	-0.836607	0.000452184	6.05269	7.54546	7.08457	LO_EC
chr1	74871542	74871942	Peak2222	-0.693607	0.00347588	6.183	7.67477	7.04646	LO_EC
chr1	7487586	7487986	Peak2223	-0.774601	0.0337193	3.40558	3.50326	5.07263	LO_EC
chr1	75314077	75314477	Peak2247	-0.694186	0.000233231	7.3248	8.40156	8.12242	LO_EC
chr1	77450391	77450791	Peak2284	-0.670286	0.0455452	4.33998	4.21094	5.55814	LO_EC
chr1	78654144	78654544	Peak2308	-0.621346	0.00903022	6.32137	7.57258	7.09754	LO_EC
chr1	79871273	79871673	Peak2316	-0.71778	0.0477581	2.53017	4.82218	4.29991	LO_EC
chr1	87928885	87929285	Peak2376	-0.907182	0.00910646	3.85279	6.28961	5.31203	LO_EC
chr1	88255900	88256300	Peak2392	-0.74105	0.000137566	6.9566	7.96324	7.81302	LO_EC
chr1	88363947	88364347	Peak2398	-0.733719	0.0225162	4.64565	5.53428	5.82778	LO_EC
chr1	88421784	88422184	Peak2406	-0.95399	0.00104508	5.35763	6.85503	6.62725	LO_EC
chr1	88422903	88423303	Peak2407	-0.614462	0.00384972	7.01525	7.98716	7.7479	LO_EC
chr1	88964271	88964671	Peak2417	-0.852009	0.0270985	1.53017	5.08538	3.91573	LO_EC
chr1	8903786	8904186	Peak2421	-0.772513	0.0327428	3.2692	4.65569	4.86288	LO_EC
chr1	89046048	89046448	Peak2422	-1.02235	0.0130105	2.4037	5.21201	4.51184	LO_EC
chr1	89193924	89194324	Peak2435	-1.94916	0.000109201	3.03085	4.28954	5.5973	LO_EC
chr1	8926111	8926511	Peak2438	-0.815972	0.00910646	4.82698	5.5644	6.04723	LO_EC
chr1	8930877	8931277	Peak2439	-0.669369	0.0131227	5.85176	6.20169	6.75738	LO_EC
chr1	89749606	89750006	Peak2454	-1.37044	0.000132612	4.3698	6.22081	6.09788	LO_EC
chr1	91756796	91757196	Peak2489	-0.788476	0.0256179	3.702	4.94803	5.17055	LO_EC
chr1	91767238	91767638	Peak2490	-1.45207	1.00829e-05	4.94295	6.31805	6.6523	LO_EC
chr1	91796631	91797031	Peak2492	-1.43717	0.0023839	2.64327	4.68518	4.98836	LO_EC
chr1	91823742	91824142	Peak2494	-0.697984	0.0288953	4.55761	6.10807	5.69018	LO_EC
chr1	92179845	92180245	Peak2506	-0.98286	0.0118242	3.33704	3.94895	5.15149	LO_EC
chr1	95073081	95073481	Peak2571	-0.821094	0.0147246	4.2692	5.46823	5.6149	LO_EC
chr1	95132152	95132552	Peak2576	-0.635437	0.0226457	5.57446	6.58072	6.45856	LO_EC
chr1	9690367	9690767	Peak2608	-0.717176	0.00401607	6.13433	7.16105	7.05181	LO_EC
chr1	97169906	97170306	Peak2611	-0.75705	0.0364576	3.33704	3.62674	4.95369	LO_EC
chr10	107889644	107890044	Peak2677	-2.14259	0.000190818	2.1117	3.99569	5.23704	LO_EC
chr10	110377799	110378199	Peak2705	-1.47878	0.00104508	3.19476	5.10667	5.34164	LO_EC
chr10	110431856	110432256	Peak2707	-0.842911	0.0211453	3.58783	4.12943	5.18658	LO_EC
chr10	111350450	111350850	Peak2740	-0.968202	0.004319	4.50002	4.79662	5.94967	LO_EC
chr10	116359984	116360384	Peak2790	-0.779911	0.0227689	4.15494	4.59579	5.51849	LO_EC
chr10	117570078	117570478	Peak2837	-2.44054	7.43534e-05	1.5336	4.62651	5.18379	LO_EC
chr10	117898144	117898544	Peak2841	-0.625185	0.0319742	5.48492	5.36339	6.39484	LO_EC
chr10	118876094	118876494	Peak2852	-0.797927	0.0320287	2.94521	3.74303	4.74824	LO_EC
chr10	119756725	119757125	Peak2876	-0.771213	0.0377023	2.64168	3.43285	4.58737	LO_EC
chr10	119825585	119825985	Peak2877	-1.12797	0.00208867	4.30552	4.62674	5.94638	LO_EC
chr10	119835836	119836236	Peak2879	-0.667184	0.0416849	4.46922	4.76955	5.62315	LO_EC
chr10	120448587	120448987	Peak2900	-0.739335	0.0348859	3.80355	3.99427	5.24168	LO_EC
chr10	121218209	121218609	Peak2933	-0.726724	0.0437891	3.2692	3.90139	4.91328	LO_EC
chr10	121290363	121290763	Peak2934	-0.909291	0.00798207	4.22929	5.39914	5.66406	LO_EC
chr10	122423209	122423609	Peak2957	-0.795002	0.00675837	5.13376	6.40794	6.25694	LO_EC
chr10	12628949	12629349	Peak2994	-2.49888	8.39958e-05	1.26094	4.2907	5.23973	LO_EC
chr10	126817599	126817999	Peak3034	-0.878945	0.00195431	5.23035	6.74897	6.41214	LO_EC
chr10	127495787	127496187	Peak3069	-0.799909	0.000608409	6.3379	7.30322	7.32253	LO_EC
chr10	127613476	127613876	Peak3077	-0.909018	0.0208473	2.52845	4.46771	4.54577	LO_EC
chr10	128793509	128793909	Peak3138	-0.777567	0.0261899	4.07479	3.94968	5.50799	LO_EC
chr10	16898475	16898875	Peak3179	-1.11152	0.0099361	2.4037	4.25211	4.69553	LO_EC
chr10	17667784	17668184	Peak3189	-0.615549	0.043766	5.0742	5.74197	6.02687	LO_EC
chr10	18181176	18181576	Peak3211	-0.86258	0.0230265	3.11856	4.21186	4.91328	LO_EC
chr10	18278943	18279343	Peak3217	-1.74755	0.000124016	3.4037	5.28896	5.65055	LO_EC
chr10	19124051	19124451	Peak3233	-0.939001	0.00528212	4.33802	5.79682	5.759	LO_EC
chr10	19873295	19873695	Peak3249	-0.865657	0.00948434	4.49782	5.08488	5.85987	LO_EC
chr10	19895820	19896220	Peak3252	-0.670732	0.0362141	4.61784	5.30832	5.72021	LO_EC
chr10	19984282	19984682	Peak3255	-0.799158	0.0230265	3.98804	4.62513	5.44212	LO_EC
chr10	20672213	20672613	Peak3263	-0.691122	0.0098004	5.7386	7.14531	6.66706	LO_EC
chr10	20880681	20881081	Peak3274	-0.657742	0.0393429	4.46877	6.10799	5.54951	LO_EC
chr10	22328868	22329268	Peak3304	-0.76186	0.0333805	3.26198	5.75593	4.8198	LO_EC
chr10	22451034	22451434	Peak3306	-0.658368	0.0218313	5.35375	6.77637	6.29675	LO_EC
chr10	22915190	22915590	Peak3307	-0.848686	0.0268532	2.52673	4.32743	4.51184	LO_EC
chr10	24554411	24554811	Peak3327	-0.781627	0.0102885	4.72713	6.75572	5.88191	LO_EC
chr10	25079440	25079840	Peak3344	-0.772945	0.00841204	5.15466	6.5412	6.26031	LO_EC
chr10	27714158	27714558	Peak3371	-0.804484	0.00443203	5.55908	5.78263	6.66433	LO_EC
chr10	30449256	30449656	Peak3403	-0.679987	0.0480987	3.89575	4.71407	5.22355	LO_EC
chr10	30457154	30457554	Peak3404	-0.635361	0.0370876	5.23061	4.84966	6.20655	LO_EC
chr10	33344053	33344453	Peak3423	-0.787571	0.0216888	4.03388	5.45117	5.40802	LO_EC
chr10	36701710	36702110	Peak3466	-0.786207	0.0294426	3.47011	4.21124	5.05223	LO_EC
chr10	38329497	38329897	Peak3477	-0.632982	0.023891	5.69876	6.00697	6.58286	LO_EC
chr10	3928622	3929022	Peak3491	-0.831551	0.0235872	3.52759	4.25182	5.15072	LO_EC
chr10	39394586	39394986	Peak3499	-0.836994	0.0149742	4.07479	5.2114	5.48164	LO_EC
chr10	40219622	40220022	Peak3524	-1.28948	0.00264584	3.03328	5.83648	5.0514	LO_EC
chr10	41195954	41196354	Peak3544	-0.692766	0.0314722	4.52759	5.92312	5.6715	LO_EC
chr10	41929623	41930023	Peak3569	-0.7684	0.0256825	4.15439	4.24943	5.53329	LO_EC
chr10	42311483	42311883	Peak3580	-0.755593	0.0325026	3.47011	5.21094	4.94145	LO_EC
chr10	42644955	42645355	Peak3588	-0.840636	0.0264302	2.85279	4.21094	4.70438	LO_EC
chr10	44160590	44160990	Peak3631	-1.28725	0.00350146	0	4.08488	4.47709	LO_EC
chr10	44729454	44729854	Peak3638	-0.694149	0.041717	3.99241	5.04132	5.28699	LO_EC
chr10	52462470	52462870	Peak3698	-1.00847	0.00540197	3.8521	6.31841	5.44678	LO_EC
chr10	53099417	53099817	Peak3703	-0.762421	0.00628824	5.43706	6.54881	6.48277	LO_EC
chr10	53316462	53316862	Peak3707	-1.38363	1.62223e-06	5.33777	6.87392	6.92015	LO_EC
chr10	59011707	59012107	Peak3763	-0.786956	0.0318973	3.1117	4.53379	4.79447	LO_EC
chr10	5913947	5914347	Peak3768	-0.858429	0.00248446	5.4719	6.96661	6.62977	LO_EC
chr10	59379291	59379691	Peak3783	-0.720377	0.0220437	4.43638	6.81654	5.56186	LO_EC
chr10	5959458	5959858	Peak3793	-0.989638	2.02987e-05	6.23233	7.57276	7.40591	LO_EC
chr10	59628813	59629213	Peak3796	-1.00847	0.00321494	4.26611	5.91164	5.74962	LO_EC
chr10	59703162	59703562	Peak3800	-1.14882	0.00233711	3.80497	5.87431	5.50069	LO_EC
chr10	59814654	59815054	Peak3808	-1.03375	0.00520548	3.79928	5.87489	5.43682	LO_EC
chr10	60521878	60522278	Peak3834	-1.06299	0.00847324	3.19801	4.90006	5.09788	LO_EC
chr10	60543001	60543401	Peak3837	-0.606872	0.0417314	5.17417	6.58107	6.08572	LO_EC
chr10	60663701	60664101	Peak3843	-0.778949	0.0366964	1.94521	5.10716	4.03462	LO_EC
chr10	6080209	6080609	Peak3852	-0.61302	0.0311366	5.43752	6.86716	6.30889	LO_EC
chr10	6096846	6097246	Peak3867	-0.786052	0.00600462	5.13433	6.86145	6.22625	LO_EC
chr10	61391833	61392233	Peak3884	-0.91791	0.0012122	5.30251	6.59632	6.51819	LO_EC
chr10	62327947	62328347	Peak3916	-0.680673	0.0165817	5.2674	6.78279	6.22625	LO_EC
chr10	62355564	62355964	Peak3919	-0.787345	0.00747841	5.15438	6.06394	6.27371	LO_EC
chr10	62645115	62645515	Peak3931	-1.8433	2.30002e-08	4.96774	5.28838	7.00085	LO_EC
chr10	62706430	62706830	Peak3934	-0.665975	0.0110564	5.91108	7.0021	6.79014	LO_EC
chr10	64496242	64496642	Peak3956	-0.978089	0.0163414	2.74667	2.2094	4.92577	LO_EC
chr10	66359788	66360188	Peak3962	-0.81605	0.00946462	4.87747	5.41709	6.10526	LO_EC
chr10	67447348	67447748	Peak3998	-0.821441	0.0289914	2.75109	4.3627	4.61959	LO_EC
chr10	69779611	69780011	Peak4052	-1.1788	0.00841204	2.1117	3.94784	4.61546	LO_EC
chr10	70303947	70304347	Peak4063	-1.8648	0.000209591	2.94392	4.56536	5.47315	LO_EC
chr10	70427471	70427871	Peak4068	-1.66711	0.00195431	1.2692	4.84848	4.55442	LO_EC
chr10	70844180	70844580	Peak4081	-1.41872	0.0026714	2.64486	4.32743	5.00653	LO_EC
chr10	75216983	75217383	Peak4130	-1.00632	0.0151813	1.27331	4.62605	4.07564	LO_EC
chr10	75355807	75356207	Peak4142	-0.639205	0.00601454	6.39624	7.36345	7.18449	LO_EC
chr10	75398347	75398747	Peak4144	-0.739188	0.00896854	5.35375	6.7626	6.38583	LO_EC
chr10	75400481	75400881	Peak4145	-1.04752	0.00113467	4.92298	5.87402	6.35779	LO_EC
chr10	75807961	75808361	Peak4158	-0.644987	0.0225162	5.40464	6.63358	6.30982	LO_EC
chr10	76365315	76365715	Peak4172	-0.801819	0.0287857	3.11628	4.87469	4.78446	LO_EC
chr10	76614899	76615299	Peak4183	-0.645241	0.0303593	5.17609	6.35368	6.13755	LO_EC
chr10	76660168	76660568	Peak4187	-0.737296	0.0205239	4.84901	5.3263	6.01752	LO_EC
chr10	7675957	7676357	Peak4190	-0.605268	0.0344785	5.46788	6.493	6.32909	LO_EC
chr10	77814925	77815325	Peak4229	-1.45514	0.000667891	3.46922	5.62605	5.48842	LO_EC
chr10	78862727	78863127	Peak4250	-1.07006	0.000907103	4.89841	5.51687	6.35036	LO_EC
chr10	79179021	79179421	Peak4268	-0.851912	0.015147	3.90239	5.51699	5.36329	LO_EC
chr10	79217630	79218030	Peak4272	-0.669473	0.0319742	4.67488	6.23099	5.7336	LO_EC
chr10	79379487	79379887	Peak4286	-0.776585	0.020089	4.19097	6.029	5.48781	LO_EC
chr10	79513879	79514279	Peak4301	-0.868721	0.000147696	6.2198	7.76895	7.26715	LO_EC
chr10	79612027	79612427	Peak4310	-0.856959	0.000142047	6.30997	7.74157	7.34226	LO_EC
chr10	79630323	79630723	Peak4312	-0.627352	0.0160714	6.01237	7.01851	6.84174	LO_EC
chr10	79641966	79642366	Peak4314	-1.08858	0.00070347	4.67138	6.74234	6.12928	LO_EC
chr10	79727454	79727854	Peak4319	-0.717299	0.010214	5.46832	6.58877	6.45825	LO_EC
chr10	79792535	79792935	Peak4323	-0.666358	0.00841204	6.03404	7.12886	6.89319	LO_EC
chr10	8007079	8007479	Peak4351	-0.811391	0.0308761	2.52501	5.01886	4.41452	LO_EC
chr10	80119202	80119602	Peak4354	-0.660579	0.0261149	5.05358	6.46784	6.03266	LO_EC
chr10	80413072	80413472	Peak4373	-0.656963	0.0403215	4.43821	6.1492	5.5289	LO_EC
chr10	80461549	80461949	Peak4378	-0.728606	0.0263511	4.4037	5.30803	5.62725	LO_EC
chr10	80569136	80569536	Peak4386	-0.617741	0.0139666	6.16569	7.37693	6.9625	LO_EC
chr10	80630396	80630796	Peak4388	-0.746639	0.0127213	5.13771	6.34531	6.23301	LO_EC
chr10	80639092	80639492	Peak4391	-0.63847	0.0326856	5.26482	6.34587	6.22391	LO_EC
chr10	80755316	80755716	Peak4398	-0.788673	0.000450467	6.41159	7.70327	7.36742	LO_EC
chr10	80852560	80852960	Peak4408	-1.07273	0.00444905	3.75404	5.45142	5.43682	LO_EC
chr10	80871840	80872240	Peak4410	-1.60462	3.8992e-05	3.98929	6.4592	5.94189	LO_EC
chr10	80879321	80879721	Peak4411	-0.758502	0.00251919	5.92363	7.38137	6.89513	LO_EC
chr10	81063539	81063939	Peak4429	-0.610472	0.0128286	6.38815	7.25633	7.16458	LO_EC
chr10	81068701	81069101	Peak4430	-1.01698	0.00063602	5.09423	6.60312	6.43511	LO_EC
chr10	82226643	82227043	Peak4453	-0.643166	0.014515	5.8999	7.29476	6.74867	LO_EC
chr10	82321651	82322051	Peak4461	-0.662668	0.00861841	5.98851	7.18596	6.84303	LO_EC
chr10	83420107	83420507	Peak4487	-0.858557	0.0243089	2.75109	4.74197	4.603	LO_EC
chr10	83701198	83701598	Peak4488	-0.748605	0.0386092	3.19368	4.36352	4.82145	LO_EC
chr10	83834711	83835111	Peak4490	-0.722461	0.04445	3.19259	4.2907	4.81621	LO_EC
chr10	84217536	84217936	Peak4506	-0.773308	0.0241166	3.80497	5.96059	5.16491	LO_EC
chr10	84534454	84534854	Peak4518	-0.687619	0.0079715	6.06482	6.5178	6.9645	LO_EC
chr10	85002466	85002866	Peak4533	-0.604184	0.0110269	6.78401	7.28027	7.54092	LO_EC
chr10	86910449	86910849	Peak4576	-0.602319	0.0338943	5.587	6.69986	6.44414	LO_EC
chr10	87389971	87390371	Peak4581	-0.804247	0.0114301	4.53017	6.19114	5.7646	LO_EC
chr10	87473658	87474058	Peak4582	-1.16122	0.00514875	0	4.29099	4.35274	LO_EC
chr10	87954345	87954745	Peak4591	-0.81403	0.0297367	2.75404	4.62559	4.58315	LO_EC
chr10	90545356	90545756	Peak4636	-0.655665	0.00255051	6.69905	7.7033	7.48642	LO_EC
chr10	92788623	92789023	Peak4663	-0.820737	0.0279607	2.9465	4.43443	4.7188	LO_EC
chr10	92895167	92895567	Peak4667	-0.93151	0.00841204	3.85073	5.93581	5.35835	LO_EC
chr10	93005040	93005440	Peak4674	-1.75038	5.57065e-05	3.75109	5.16981	5.92076	LO_EC
chr10	93022449	93022849	Peak4676	-0.755536	0.020443	4.33802	5.92396	5.56186	LO_EC
chr10	93296351	93296751	Peak4685	-0.840539	0.00806982	4.64287	6.7615	5.90823	LO_EC
chr10	94820346	94820746	Peak4728	-0.779079	0.0300729	3.46474	4.89854	5.0222	LO_EC
chr10	94847052	94847452	Peak4729	-1.07854	0.00950552	2.64486	5.15008	4.69943	LO_EC
chr10	95039563	95039963	Peak4743	-0.734829	0.0410234	3.33507	4.46951	4.93152	LO_EC
chr10	95242702	95243102	Peak4757	-1.26547	0.00540012	2.53017	3.74176	4.88269	LO_EC
chr10	9621479	9621879	Peak4777	-0.65918	0.0435224	4.23035	6.0853	5.37065	LO_EC
chr10	98749457	98749857	Peak4795	-0.68538	0.0480803	3.80426	4.59743	5.17336	LO_EC
chr10	99501178	99501578	Peak4808	-0.889376	0.0195539	3.19368	3.84868	4.9764	LO_EC
chr11	100181552	100181952	Peak4823	-0.690083	0.0045595	6.17417	7.31262	7.04917	LO_EC
chr11	100573442	100573842	Peak4852	-0.634877	0.0458173	4.46788	6.25077	5.51184	LO_EC
chr11	100870539	100870939	Peak4867	-0.648556	0.0216021	5.46765	6.60336	6.37976	LO_EC
chr11	101331512	101331912	Peak4900	-1.21824	0.00320062	3.33802	5.27124	5.26223	LO_EC
chr11	101633771	101634171	Peak4919	-0.81526	0.00540012	5.07508	6.62588	6.22256	LO_EC
chr11	101845437	101845837	Peak4929	-0.927561	0.00570707	4.19097	6.38124	5.60092	LO_EC
chr11	102291510	102291910	Peak4959	-0.774761	0.00335948	5.63081	7.19654	6.65257	LO_EC
chr11	102680629	102681029	Peak4981	-0.776475	0.0094321	4.99054	6.27983	6.11659	LO_EC
chr11	102977235	102977635	Peak5001	-0.627237	0.0051574	6.6108	7.80633	7.37582	LO_EC
chr11	103032348	103032748	Peak5006	-1.09646	0.00554716	3.46922	4.82198	5.27989	LO_EC
chr11	103201022	103201422	Peak5016	-0.672294	0.048327	3.94521	4.84946	5.22083	LO_EC
chr11	103201981	103202381	Peak5017	-0.724075	0.0344547	4.19639	4.04201	5.53269	LO_EC
chr11	103223368	103223768	Peak5020	-0.624516	0.037516	4.96647	6.55693	5.90608	LO_EC
chr11	104180634	104181034	Peak5055	-1.0222	0.00444027	4.07361	5.26948	5.64651	LO_EC
chr11	105450775	105451175	Peak5082	-0.625633	0.0468858	4.72825	6.04166	5.73308	LO_EC
chr11	106417543	106417943	Peak5106	-1.0205	0.01378	2.40932	4.59462	4.59883	LO_EC
chr11	113901681	113902081	Peak5249	-0.832181	0.027095	2.5336	5.86155	4.35408	LO_EC
chr11	114026886	114027286	Peak5254	-1.11267	0.00453589	3.69666	4.84946	5.48102	LO_EC
chr11	114403422	114403822	Peak5266	-1.06436	0.00579444	3.52931	5.39941	5.27799	LO_EC
chr11	114932285	114932685	Peak5294	-1.38835	0.000177755	4.33704	6.17178	6.10633	LO_EC
chr11	114964781	114965181	Peak5297	-0.71757	0.0247669	4.53317	6.18075	5.68482	LO_EC
chr11	115190592	115190992	Peak5313	-0.747241	0.0380358	3.19368	4.59626	4.78347	LO_EC
chr11	115336752	115337152	Peak5326	-0.691847	0.0205953	5.07243	6.50113	6.09976	LO_EC
chr11	115375610	115376010	Peak5329	-0.606164	0.032352	5.54374	6.58101	6.39932	LO_EC
chr11	115449445	115449845	Peak5332	-0.844844	0.0177414	3.98617	4.21155	5.49457	LO_EC
chr11	115948165	115948565	Peak5366	-0.611139	0.0191656	6.16417	6.86204	6.97361	LO_EC
chr11	115988489	115988889	Peak5369	-1.8904	0.000137566	2.85279	5.87373	5.35655	LO_EC
chr11	116190943	116191343	Peak5385	-1.20909	0.000571009	4.26456	6.57261	5.88144	LO_EC
chr11	116274166	116274566	Peak5389	-0.722221	0.0235872	4.59112	5.99489	5.74447	LO_EC
chr11	116586419	116586819	Peak5412	-0.628372	0.0363133	4.98992	6.48382	5.93694	LO_EC
chr11	116767478	116767878	Peak5423	-0.78069	0.0358214	2.40932	4.99569	4.32034	LO_EC
chr11	116832132	116832532	Peak5427	-0.653442	0.0484493	4.33655	4.89949	5.50353	LO_EC
chr11	117127372	117127772	Peak5449	-1.50846	0.000101603	3.89907	6.66357	5.79313	LO_EC
chr11	117206709	117207109	Peak5457	-0.681978	0.0482372	3.58865	5.45052	4.93904	LO_EC
chr11	117465386	117465786	Peak5478	-0.673043	0.0465037	4.03388	5.12781	5.2825	LO_EC
chr11	117470045	117470445	Peak5479	-0.68362	0.0278803	4.87612	5.36352	5.94474	LO_EC
chr11	117824685	117825085	Peak5506	-0.641988	0.00900244	6.04362	7.56488	6.8601	LO_EC
chr11	117830391	117830791	Peak5507	-0.687604	0.00174563	6.68591	8.06634	7.51864	LO_EC
chr11	117836755	117837155	Peak5508	-0.623572	0.0139117	6.04181	7.4635	6.84432	LO_EC
chr11	11925737	11926137	Peak5564	-0.689717	0.0331002	4.30201	6.28939	5.46003	LO_EC
chr11	119799076	119799476	Peak5586	-0.829895	0.0105525	4.52931	5.67029	5.81752	LO_EC
chr11	120177389	120177789	Peak5609	-0.932895	0.00241238	4.82663	6.64924	6.12783	LO_EC
chr11	120211492	120211892	Peak5611	-0.758087	0.00216594	6.10443	6.80274	7.06735	LO_EC
chr11	120494794	120495194	Peak5629	-0.700966	0.00736823	5.90024	6.7132	6.82152	LO_EC
chr11	121121024	121121424	Peak5665	-0.743902	0.0125614	5.05299	6.25033	6.14043	LO_EC
chr11	15121843	15122243	Peak5705	-1.70524	0.00051579	3.11284	4.40035	5.5295	LO_EC
chr11	18920264	18920664	Peak5740	-0.685838	0.0315647	4.53103	5.86194	5.64853	LO_EC
chr11	20759326	20759726	Peak5797	-1.10369	0.00861841	2.75404	4.97341	4.82956	LO_EC
chr11	21138667	21139067	Peak5801	-1.41757	0.000233231	4.07596	5.80895	5.90946	LO_EC
chr11	21534498	21534898	Peak5805	-0.772061	0.0260936	3.75109	5.56512	5.15718	LO_EC
chr11	23111112	23111512	Peak5840	-0.874402	0.016852	3.46743	5.44974	5.06962	LO_EC
chr11	24012284	24012684	Peak5858	-1.02243	0.0132725	2.27125	5.48369	4.41927	LO_EC
chr11	24207857	24208257	Peak5864	-0.849927	0.0268191	2.40183	4.7424	4.39539	LO_EC
chr11	25814052	25814452	Peak5871	-1.15709	0.00706803	2.84866	4.43232	4.98282	LO_EC
chr11	29536754	29537154	Peak5910	-0.748256	0.0232704	4.26559	5.88743	5.51406	LO_EC
chr11	30935042	30935442	Peak5941	-0.960722	0.0152528	3.0357	4.32856	4.96022	LO_EC
chr11	31296785	31297185	Peak5945	-0.830669	0.0166192	4.03146	4.97251	5.45479	LO_EC
chr11	31644456	31644856	Peak5949	-0.732844	0.0243089	4.69972	3.99498	5.90654	LO_EC
chr11	31880121	31880521	Peak5956	-3.00464	5.48884e-06	0.94005	5.27021	5.57892	LO_EC
chr11	31882606	31883006	Peak5957	-1.20047	0.00028818	4.80141	5.99552	6.35992	LO_EC
chr11	31886930	31887330	Peak5958	-2.63524	1.14345e-05	1.75109	5.53366	5.38462	LO_EC
chr11	32248755	32249155	Peak5981	-1.06344	0.00925654	3.03085	4.25092	5.00107	LO_EC
chr11	32283789	32284189	Peak5982	-1.06389	0.00671176	3.19151	6.29824	4.99876	LO_EC
chr11	32436968	32437368	Peak5989	-0.835778	0.0179087	3.80284	5.10782	5.27728	LO_EC
chr11	32501917	32502317	Peak5994	-0.659595	0.0433142	4.37028	5.87373	5.51244	LO_EC
chr11	3309016	3309416	Peak6008	-0.631645	0.0164845	5.97887	7.24565	6.82314	LO_EC
chr11	34197597	34197997	Peak6038	-0.69737	0.0387655	4.15216	5.36187	5.41863	LO_EC
chr11	35744052	35744452	Peak6071	-0.732424	0.0415021	3.19585	4.79662	4.79545	LO_EC
chr11	35859282	35859682	Peak6077	-0.699225	0.0497489	3.11055	4.84848	4.67691	LO_EC
chr11	36510630	36511030	Peak6082	-0.874987	0.0139567	0	4.39981	3.94234	LO_EC
chr11	40349892	40350292	Peak6113	-0.899518	0.0191373	3.03085	4.36325	4.84983	LO_EC
chr11	43447559	43447959	Peak6145	-0.691539	0.0331618	4.56307	5.6714	5.72264	LO_EC
chr11	4604328	4604728	Peak6202	-0.933408	0.00290212	4.72676	6.1913	6.05029	LO_EC
chr11	48637161	48637561	Peak6239	-0.62602	0.0497489	4.72751	5.2114	5.76647	LO_EC
chr11	49007941	49008341	Peak6251	-0.74913	0.0392695	3.19585	3.28954	4.87329	LO_EC
chr11	49264332	49264732	Peak6259	-1.09642	0.0077801	3.11513	4.25182	5.08083	LO_EC
chr11	49423030	49423430	Peak6261	-1.07703	0.00319771	3.8521	6.0959	5.47482	LO_EC
chr11	49472705	49473105	Peak6265	-0.709525	0.0157919	5.37028	5.88743	6.40324	LO_EC
chr11	49607368	49607768	Peak6268	-0.60635	0.0225162	5.72676	7.27991	6.53736	LO_EC
chr11	50139062	50139462	Peak6293	-0.652341	0.00824896	6.30326	7.17104	7.13722	LO_EC
chr11	51103132	51103532	Peak6321	-0.711933	0.0145273	5.09394	6.74844	6.11805	LO_EC
chr11	51419822	51420222	Peak6328	-0.66469	0.0285167	5.01115	6.05199	6.02687	LO_EC
chr11	51911994	51912394	Peak6354	-0.629763	0.00600462	6.51561	7.52486	7.28899	LO_EC
chr11	52096586	52096986	Peak6363	-0.669782	0.0384761	4.37028	5.87421	5.5013	LO_EC
chr11	52184114	52184514	Peak6369	-0.709697	0.0336802	4.33704	4.59462	5.58891	LO_EC
chr11	53164048	53164448	Peak6386	-0.601085	0.0308573	5.70124	6.89304	6.54092	LO_EC
chr11	5420705	5421105	Peak6427	-1.19351	0.000109309	5.01053	6.80971	6.50799	LO_EC
chr11	54767456	54767856	Peak6441	-1.2825	0.00051579	4.46832	4.71299	6.17923	LO_EC
chr11	55274560	55274960	Peak6466	-0.741635	0.00654668	5.63061	6.80295	6.63719	LO_EC
chr11	55498521	55498921	Peak6475	-0.84758	0.00135404	5.63181	6.76239	6.72883	LO_EC
chr11	5755668	5756068	Peak6496	-0.84321	0.0202452	3.58618	5.34405	5.16567	LO_EC
chr11	57614859	57615259	Peak6499	-0.905629	0.000894449	5.35448	7.09136	6.5308	LO_EC
chr11	57697350	57697750	Peak6503	-0.709227	0.0497489	2.11628	4.62789	4.11553	LO_EC
chr11	57823134	57823534	Peak6512	-0.681604	0.0458945	3.80426	5.30775	5.09492	LO_EC
chr11	58807830	58808230	Peak6547	-0.706865	0.0276465	4.55803	5.93553	5.7174	LO_EC
chr11	59197861	59198261	Peak6563	-1.1894	0.00727505	2.40558	4.6249	4.71109	LO_EC
chr11	59319506	59319906	Peak6569	-0.874829	0.00171457	5.37195	7.04697	6.53983	LO_EC
chr11	60540563	60540963	Peak6620	-0.719635	0.0220437	4.74962	6.3364	5.87282	LO_EC
chr11	60754895	60755295	Peak6636	-0.728117	0.037516	3.7533	4.74091	5.19011	LO_EC
chr11	62352396	62352796	Peak6692	-0.910612	0.00575862	4.49914	5.97278	5.87548	LO_EC
chr11	62443592	62443992	Peak6698	-1.90292	0.000191003	2.65119	5.94784	5.21811	LO_EC
chr11	62462076	62462476	Peak6699	-0.796471	0.00455102	5.30427	6.83574	6.39122	LO_EC
chr11	62734626	62735026	Peak6710	-0.73801	0.0294774	4.03207	5.53415	5.3516	LO_EC
chr11	63268646	63269046	Peak6723	-1.53097	0.000109201	4.15327	6.00715	6.08612	LO_EC
chr11	63269849	63270249	Peak6724	-1.32535	0.00271327	3.11399	4.43285	5.23704	LO_EC
chr11	63765897	63766297	Peak6737	-0.866452	0.0173365	3.53017	5.12862	5.11553	LO_EC
chr11	64214146	64214546	Peak6744	-0.98636	0.0117095	3.4037	3.21186	5.22355	LO_EC
chr11	66796283	66796683	Peak6780	-1.05115	0.0119933	2.4037	4.76851	4.57892	LO_EC
chr11	66831360	66831760	Peak6783	-1.22316	1.28517e-05	5.46832	6.65654	6.91992	LO_EC
chr11	66838297	66838697	Peak6784	-0.619222	0.0288953	5.54629	6.94793	6.42753	LO_EC
chr11	66894677	66895077	Peak6788	-0.834374	0.0232333	3.11513	5.67129	4.74447	LO_EC
chr11	67193190	67193590	Peak6791	-0.953608	0.00947583	3.64644	5.5803	5.26295	LO_EC
chr11	69179859	69180259	Peak6851	-1.29241	0.00350146	2.85416	5.08638	5.00107	LO_EC
chr11	69373586	69373986	Peak6865	-0.650504	0.0388562	4.87747	5.72745	5.93121	LO_EC
chr11	69374967	69375367	Peak6866	-0.891687	0.00748701	4.3015	5.9605	5.67745	LO_EC
chr11	69392631	69393031	Peak6868	-0.691432	0.00756883	5.77828	7.1552	6.68311	LO_EC
chr11	69413647	69414047	Peak6871	-0.762679	0.0365216	2.85416	5.19177	4.53269	LO_EC
chr11	69517553	69517953	Peak6881	-1.04016	0.00224461	4.61662	4.71407	6.11113	LO_EC
chr11	69810638	69811038	Peak6908	-0.751012	0.0105053	5.17169	6.58024	6.25102	LO_EC
chr11	69840147	69840547	Peak6913	-0.656074	0.0362141	4.70315	6.40774	5.75013	LO_EC
chr11	70278783	70279183	Peak6925	-0.896723	0.0180447	3.11742	5.23228	4.86288	LO_EC
chr11	70460343	70460743	Peak6935	-0.703975	0.0130843	5.51474	6.77007	6.50688	LO_EC
chr11	70846831	70847231	Peak6951	-0.755134	0.0196151	4.339	6.28976	5.55168	LO_EC
chr11	72242814	72243214	Peak6978	-0.727996	0.0351335	3.64486	5.4842	5.0222	LO_EC
chr11	72739985	72740385	Peak6992	-0.811169	0.0256066	3.40558	4.68473	4.99154	LO_EC
chr11	72844325	72844725	Peak6999	-0.991126	0.00806111	3.69819	5.61054	5.36395	LO_EC
chr11	73953558	73953958	Peak7011	-0.789065	0.0215737	4.26456	4.28896	5.64098	LO_EC
chr11	74259118	74259518	Peak7013	-0.71861	0.0476872	2.75697	3.89949	4.54577	LO_EC
chr11	74645524	74645924	Peak7031	-0.687308	0.000608409	6.87544	8.12598	7.67794	LO_EC
chr11	75841146	75841546	Peak7078	-0.904757	0.0127692	3.46653	6.14004	5.03996	LO_EC
chr11	76164802	76165202	Peak7088	-0.798944	0.00185727	5.88613	6.93023	6.91618	LO_EC
chr11	77275858	77276258	Peak7118	-0.699084	0.0401752	3.7533	5.67051	5.0514	LO_EC
chr11	77730612	77731012	Peak7148	-0.696493	0.0391978	4.03328	5.39766	5.30505	LO_EC
chr11	77795359	77795759	Peak7152	-0.640272	0.015152	5.72601	7.24125	6.57438	LO_EC
chr11	78008097	78008497	Peak7167	-0.827096	0.00885894	4.75256	6.19076	6.00308	LO_EC
chr11	78074943	78075343	Peak7170	-0.699722	0.00439036	6.11599	7.2064	7.0048	LO_EC
chr11	78171906	78172306	Peak7176	-0.916897	0.0107272	3.8007	5.56428	5.34413	LO_EC
chr11	78510825	78511225	Peak7190	-0.654725	0.00947583	6.03207	7.1813	6.87846	LO_EC
chr11	79066941	79067341	Peak7207	-0.873085	0.0173365	3.64248	4.7407	5.25163	LO_EC
chr11	79544917	79545317	Peak7221	-0.791223	0.0200224	4.40324	3.79641	5.75764	LO_EC
chr11	79856325	79856725	Peak7229	-0.821522	0.0288278	2.75256	4.43443	4.59464	LO_EC
chr11	82689132	82689532	Peak7275	-0.883084	0.0230265	2.40558	5.25107	4.36754	LO_EC
chr11	83665033	83665433	Peak7299	-0.792913	0.0333018	2.75697	4.59696	4.58623	LO_EC
chr11	83678775	83679175	Peak7300	-0.882725	0.00900655	4.33655	5.17029	5.72978	LO_EC
chr11	8487312	8487712	Peak7339	-0.920074	0.00485151	4.67565	5.51674	6.03842	LO_EC
chr11	84953472	84953872	Peak7341	-0.683194	0.00622788	6.03282	7.18635	6.90884	LO_EC
chr11	8524611	8525011	Peak7351	-0.841228	0.0208435	3.47011	5.19068	5.05528	LO_EC
chr11	8553714	8554114	Peak7356	-0.831103	0.0147371	4.23088	4.99623	5.60868	LO_EC
chr11	86267498	86267898	Peak7377	-0.721992	0.0379244	3.52845	5.54942	4.9291	LO_EC
chr11	86272251	86272651	Peak7378	-1.28355	0.00517465	2.40558	4.36463	4.80538	LO_EC
chr11	87912557	87912957	Peak7441	-0.802508	0.0108978	4.72563	5.8993	5.94683	LO_EC
chr11	87952754	87953154	Peak7444	-0.673121	0.0156546	5.40534	7.21155	6.34197	LO_EC
chr11	87984073	87984473	Peak7446	-0.934581	0.00271327	5.17526	5.9248	6.49742	LO_EC
chr11	88347819	88348219	Peak7466	-0.714876	0.0324999	4.36692	5.65682	5.62725	LO_EC
chr11	88485943	88486343	Peak7471	-0.734298	0.0353938	3.80213	4.65659	5.22699	LO_EC
chr11	88865740	88866140	Peak7497	-0.683562	0.049635	3.59112	4.8993	4.97553	LO_EC
chr11	88967138	88967538	Peak7503	-0.713527	0.0403699	3.90239	4.92518	5.3083	LO_EC
chr11	9035608	9036008	Peak7519	-0.741225	0.0201663	4.61743	5.80996	5.79678	LO_EC
chr11	94024373	94024773	Peak7544	-0.730906	0.0077103	5.76457	5.99507	6.75312	LO_EC
chr11	94072354	94072754	Peak7545	-0.736793	0.00133119	6.42862	7.36828	7.32863	LO_EC
chr11	94790161	94790561	Peak7572	-1.96131	0.00014945	2.64644	5.58078	5.28179	LO_EC
chr11	95197970	95198370	Peak7598	-0.614214	0.0084738	6.40324	7.72771	7.16298	LO_EC
chr11	96558178	96558578	Peak7664	-1.18603	0.00570398	2.75404	5.27036	4.83571	LO_EC
chr11	96574808	96575208	Peak7665	-1.03538	0.000269697	5.30125	6.803	6.62315	LO_EC
chr11	97012112	97012512	Peak7704	-1.59712	9.03125e-05	3.80497	6.19122	5.80538	LO_EC
chr11	97049327	97049727	Peak7705	-0.624832	0.00243653	6.93357	8.2897	7.66991	LO_EC
chr11	97150960	97151360	Peak7710	-0.918987	0.0114301	3.90239	5.14848	5.47025	LO_EC
chr11	97204969	97205369	Peak7715	-1.00156	0.00982583	3.46563	4.39954	5.24436	LO_EC
chr11	97265710	97266110	Peak7720	-0.678494	0.0297367	4.77936	5.69948	5.84983	LO_EC
chr11	97394270	97394670	Peak7736	-0.758998	0.0271576	3.99241	5.1504	5.35588	LO_EC
chr11	97928594	97928994	Peak7780	-0.809554	0.00516947	5.21052	6.48464	6.34039	LO_EC
chr11	98160110	98160510	Peak7789	-0.747264	0.0260561	4.03025	5.87402	5.32219	LO_EC
chr11	98273564	98273964	Peak7798	-0.731946	0.0200528	4.67332	5.95977	5.81931	LO_EC
chr11	98697852	98698252	Peak7823	-0.683761	0.0298001	4.67138	5.97224	5.76647	LO_EC
chr12	100630863	100631263	Peak7868	-1.15073	0.000445271	4.69933	6.38056	6.2134	LO_EC
chr12	101455233	101455633	Peak7887	-0.903116	0.0121357	3.94585	5.46912	5.49518	LO_EC
chr12	101516616	101517016	Peak7891	-0.86449	0.0256521	2.4037	4.32828	4.46797	LO_EC
chr12	102340829	102341229	Peak7923	-1.39814	0.00165878	3.18934	5.10815	5.29991	LO_EC
chr12	105615368	105615768	Peak7985	-1.16285	0.00900655	2.11856	3.04201	4.66606	LO_EC
chr12	105686263	105686663	Peak7990	-1.01481	0.00733159	3.64565	4.8993	5.33161	LO_EC
chr12	105855483	105855883	Peak7996	-0.94202	0.00925658	3.85004	5.48509	5.42163	LO_EC
chr12	106973241	106973641	Peak8040	-0.742106	0.0269424	4.33851	4.5656	5.6252	LO_EC
chr12	107413438	107413838	Peak8059	-0.629321	0.0226457	5.61602	6.79626	6.48133	LO_EC
chr12	108267142	108267542	Peak8068	-0.817348	0.0305002	2.64168	4.08655	4.58201	LO_EC
chr12	108567241	108567641	Peak8070	-0.909949	0.0194889	2.85416	4.25062	4.7585	LO_EC
chr12	109207919	109208319	Peak8073	-1.45277	0.00359961	0.94521	4.04028	4.44149	LO_EC
chr12	109218295	109218695	Peak8074	-0.701391	0.0354042	3.85004	6.49225	5.09275	LO_EC
chr12	109842699	109843099	Peak8101	-0.661349	0.0468688	4.11399	5.48407	5.29734	LO_EC
chr12	109950897	109951297	Peak8106	-1.0765	0.0110498	2.64486	3.04132	4.8559	LO_EC
chr12	110030928	110031328	Peak8110	-0.636005	0.0118642	6.01022	7.23114	6.83199	LO_EC
chr12	110781045	110781445	Peak8133	-1.6982	3.17105e-05	3.94457	5.90006	6.0038	LO_EC
chr12	112404211	112404611	Peak8187	-0.755699	0.0159458	4.64525	6.16078	5.80851	LO_EC
chr12	112908589	112908989	Peak8210	-0.646851	0.0245199	5.63201	5.51811	6.55707	LO_EC
chr12	114033909	114034309	Peak8256	-0.702645	0.0247044	4.75183	6.11744	5.8476	LO_EC
chr12	114386700	114387100	Peak8280	-0.717246	0.0110272	5.50068	6.29932	6.49764	LO_EC
chr12	121012161	121012561	Peak8370	-0.948161	0.0169347	2.74962	4.68496	4.74549	LO_EC
chr12	12880413	12880813	Peak8390	-0.831126	0.0284573	2.64486	4.68716	4.56614	LO_EC
chr12	13190902	13191302	Peak8397	-0.810813	0.0299058	2.94263	3.99463	4.74447	LO_EC
chr12	15121569	15121969	Peak8404	-0.868908	0.0198751	3.52931	3.79805	5.2134	LO_EC
chr12	16291875	16292275	Peak8410	-0.89823	0.0180457	3.11284	5.08688	4.87329	LO_EC
chr12	16857630	16858030	Peak8421	-0.762199	0.0289147	3.64486	5.5965	5.06275	LO_EC
chr12	16901229	16901629	Peak8423	-0.715625	0.0099361	5.4037	6.89902	6.38517	LO_EC
chr12	17200147	17200547	Peak8429	-0.722389	0.0415915	3.58948	3.43337	5.09275	LO_EC
chr12	17273113	17273513	Peak8431	-1.30296	0.000207913	4.43729	6.2708	6.10967	LO_EC
chr12	17551322	17551722	Peak8436	-0.665977	0.00512143	6.25777	7.38584	7.0864	LO_EC
chr12	17888343	17888743	Peak8446	-0.740669	0.00515238	5.55845	7.3769	6.53816	LO_EC
chr12	18142323	18142723	Peak8449	-1.30193	9.02371e-06	5.21159	6.76234	6.74636	LO_EC
chr12	18233470	18233870	Peak8453	-1.84794	0.000132627	3.19368	4.74218	5.61546	LO_EC
chr12	18394044	18394444	Peak8455	-0.86936	0.00113467	5.63121	6.75609	6.75807	LO_EC
chr12	20300014	20300414	Peak8465	-0.687334	0.0482853	3.69895	4.56368	5.09275	LO_EC
chr12	20811332	20811732	Peak8468	-1.35969	0.00353261	2.75257	2.74218	5.11181	LO_EC
chr12	20812564	20812964	Peak8469	-1.71987	1.3647e-05	4.40464	4.24913	6.44467	LO_EC
chr12	20819657	20820057	Peak8470	-0.98179	0.00624285	4.26611	3.56368	5.82242	LO_EC
chr12	20821533	20821933	Peak8471	-0.915431	0.000269697	5.80372	7.22161	6.94249	LO_EC
chr12	20850925	20851325	Peak8473	-0.760182	0.0300511	3.85279	4.62766	5.29546	LO_EC
chr12	20920449	20920849	Peak8474	-1.49528	0.000208507	4.07302	4.56512	6.00696	LO_EC
chr12	21117272	21117672	Peak8477	-0.752891	0.00461236	5.67313	6.87469	6.66851	LO_EC
chr12	21210447	21210847	Peak8480	-2.40188	0.000124016	1.26508	4.74155	5.086	LO_EC
chr12	25256868	25257268	Peak8497	-0.693145	0.0137425	5.48204	6.91781	6.4531	LO_EC
chr12	25809440	25809840	Peak8521	-1.19785	0.000112995	4.92298	6.68479	6.42367	LO_EC
chr12	26160330	26160730	Peak8525	-0.761093	0.0374273	2.85416	5.10881	4.56186	LO_EC
chr12	27217837	27218237	Peak8529	-0.775492	0.0370624	2.52673	4.25271	4.48616	LO_EC
chr12	27749839	27750239	Peak8530	-0.810939	0.0173365	3.80212	6.50106	5.17896	LO_EC
chr12	27767767	27768167	Peak8531	-0.763918	0.0174828	4.46967	6.22203	5.67889	LO_EC
chr12	27824862	27825262	Peak8532	-0.723266	0.0469707	2.26508	5.24973	4.1256	LO_EC
chr12	27835992	27836392	Peak8533	-0.724694	0.0241648	4.33655	6.29882	5.50962	LO_EC
chr12	29320646	29321046	Peak8539	-0.641428	0.0367578	4.92102	6.04097	5.91405	LO_EC
chr12	29360016	29360416	Peak8541	-0.67837	0.0151748	5.50046	6.83618	6.4453	LO_EC
chr12	30041849	30042249	Peak8552	-1.22922	0.00574697	2.4037	5.25047	4.65806	LO_EC
chr12	3186494	3186894	Peak8568	-0.873851	0.0251975	2.1094	4.501	4.32034	LO_EC
chr12	32319309	32319709	Peak8576	-0.756662	0.031423	3.64327	5.23213	5.09195	LO_EC
chr12	33413275	33413675	Peak8590	-0.694599	0.0468858	3.53103	4.97305	4.94145	LO_EC
chr12	33738581	33738981	Peak8600	-0.921415	0.0159674	3.27023	4.39874	5.03379	LO_EC
chr12	33769564	33769964	Peak8601	-0.814683	0.0255237	3.339	4.84808	4.94145	LO_EC
chr12	33803562	33803962	Peak8602	-1.20489	0.00557971	2.85416	4.8993	5.00192	LO_EC
chr12	3414890	3415290	Peak8622	-0.827084	0.027249	2.94392	4.65614	4.71776	LO_EC
chr12	3807889	3808289	Peak8655	-0.720731	0.033149	3.98742	5.41616	5.2825	LO_EC
chr12	39456218	39456618	Peak8665	-0.727743	0.0191082	5.01145	4.76955	6.13217	LO_EC
chr12	39505725	39506125	Peak8666	-0.600488	0.0298676	5.57467	6.83583	6.40531	LO_EC
chr12	4295238	4295638	Peak8709	-0.846672	0.0226494	3.27023	4.76872	4.94145	LO_EC
chr12	47920188	47920588	Peak8734	-0.708007	0.0145443	5.23008	6.55675	6.24605	LO_EC
chr12	48230764	48231164	Peak8735	-1.17528	0.00210752	4.0742	4.46848	5.809	LO_EC
chr12	53604535	53604935	Peak8781	-0.745628	0.000600511	6.47709	7.8553	7.36832	LO_EC
chr12	55963641	55964041	Peak8814	-0.871886	0.00148641	5.60271	6.93097	6.75295	LO_EC
chr12	56574373	56574773	Peak8829	-0.953071	0.00647713	4.15717	5.84966	5.65458	LO_EC
chr12	56606342	56606742	Peak8832	-0.626915	0.0369006	5.42013	5.39995	6.36943	LO_EC
chr12	56655818	56656218	Peak8836	-1.24949	0.00707515	1.53017	3.74261	4.45417	LO_EC
chr12	57715392	57715792	Peak8852	-0.878714	0.0156849	3.70124	5.06496	5.27205	LO_EC
chr12	66018589	66018989	Peak8891	-0.733806	0.00601454	5.70067	6.74907	6.6752	LO_EC
chr12	70298165	70298565	Peak8912	-1.09064	0.00151076	4.3015	6.21132	5.83086	LO_EC
chr12	70547558	70547958	Peak8923	-0.746316	0.0186165	4.61743	5.82248	5.79313	LO_EC
chr12	70802652	70803052	Peak8931	-1.8124	0.000839119	2.1117	4.39766	4.99473	LO_EC
chr12	73216704	73217104	Peak8991	-0.724553	0.0443437	3.11399	4.08655	4.75951	LO_EC
chr12	73543063	73543463	Peak8997	-0.601825	0.0358214	5.43889	6.92953	6.30154	LO_EC
chr12	75226986	75227386	Peak9045	-0.700339	0.0492873	3.40089	3.8471	4.96022	LO_EC
chr12	78017178	78017578	Peak9113	-0.792647	0.0263366	3.75477	4.04063	5.26487	LO_EC
chr12	79849638	79850038	Peak9132	-0.73426	0.00187195	6.47631	7.62714	7.38319	LO_EC
chr12	81393055	81393455	Peak9195	-1.70491	0.00131461	1.94263	5.32601	4.75475	LO_EC
chr12	82119999	82120399	Peak9223	-0.73361	0.032463	3.64486	6.00662	4.99154	LO_EC
chr12	82433548	82433948	Peak9228	-0.868391	0.0140906	3.69895	5.80945	5.18936	LO_EC
chr12	82695915	82696315	Peak9233	-0.655725	0.0255907	5.37123	6.27095	6.33354	LO_EC
chr12	82960910	82961310	Peak9240	-1.37477	0.000753686	3.64248	6.11752	5.55226	LO_EC
chr12	8408906	8409306	Peak9258	-1.50775	0.00256106	2.11856	4.99552	4.76496	LO_EC
chr12	86813009	86813409	Peak9334	-0.898751	0.00720187	4.339	6.08488	5.72456	LO_EC
chr12	86826850	86827250	Peak9336	-0.785534	0.0015199	5.97777	7.3133	6.97076	LO_EC
chr12	86940137	86940537	Peak9342	-0.955943	0.00574697	4.1953	5.83499	5.66752	LO_EC
chr12	86956333	86956733	Peak9343	-0.850322	0.0132884	4.30351	4.17108	5.71109	LO_EC
chr12	86979869	86980269	Peak9346	-0.876972	0.0165062	3.64644	4.39847	5.24168	LO_EC
chr12	87762313	87762713	Peak9363	-0.794661	0.0290459	3.26817	4.53354	4.88955	LO_EC
chr12	88101967	88102367	Peak9380	-0.932001	0.0193261	2.52501	4.43416	4.6237	LO_EC
chr12	88165025	88165425	Peak9386	-0.870199	5.39055e-05	6.47665	7.8091	7.50069	LO_EC
chr12	88235403	88235803	Peak9393	-0.966163	0.00596733	4.07538	5.70024	5.58046	LO_EC
chr12	88240352	88240752	Peak9394	-0.822598	0.00561231	5.19476	5.89949	6.35802	LO_EC
chr12	88246152	88246552	Peak9396	-0.691787	0.041717	4.11399	4.53207	5.3978	LO_EC
chr13	100184043	100184443	Peak9490	-0.682831	0.0416849	3.94714	5.88638	5.1754	LO_EC
chr13	100203272	100203672	Peak9491	-1.59268	0.00152447	2.53189	4.04235	5.07783	LO_EC
chr13	100214339	100214739	Peak9492	-0.689407	0.00951067	5.7386	6.79646	6.65806	LO_EC
chr13	100379262	100379662	Peak9496	-2.48086	5.14177e-06	2.40558	5.71418	5.55599	LO_EC
chr13	101070629	101071029	Peak9505	-0.804804	0.0324667	2.52845	4.08655	4.48616	LO_EC
chr13	104711115	104711515	Peak9565	-0.634587	0.0324413	5.17554	6.50889	6.11034	LO_EC
chr13	104884883	104885283	Peak9567	-0.911288	0.0139055	3.5903	4.65659	5.22355	LO_EC
chr13	105331090	105331490	Peak9577	-0.698901	0.0492351	3.26404	4.59696	4.809	LO_EC
chr13	105450776	105451176	Peak9581	-1.91893	0.000753206	1.74814	3.6272	4.96671	LO_EC
chr13	105704583	105704983	Peak9585	-1.72588	3.25086e-05	4.11456	4.99712	6.21166	LO_EC
chr13	107812263	107812663	Peak9601	-1.01882	0.00168311	4.64446	6.23167	6.0666	LO_EC
chr13	108680236	108680636	Peak9619	-0.839385	0.000156554	6.37183	7.56115	7.37915	LO_EC
chr13	108745413	108745813	Peak9621	-0.917824	0.00047432	5.60373	7.04709	6.76503	LO_EC
chr13	112280020	112280420	Peak9669	-0.635525	0.0110761	6.27542	6.91239	7.09181	LO_EC
chr13	112322442	112322842	Peak9671	-1.33026	0.00166325	3.64248	4.53256	5.61227	LO_EC
chr13	112351152	112351552	Peak9674	-0.736262	0.0440228	2.85416	2.74473	4.71495	LO_EC
chr13	112476390	112476790	Peak9676	-0.686511	0.0163231	5.50243	6.58078	6.4714	LO_EC
chr13	112538899	112539299	Peak9679	-0.691987	0.0406019	4.03085	5.04149	5.29991	LO_EC
chr13	112821273	112821673	Peak9692	-0.812427	0.0219418	3.99179	4.68672	5.47543	LO_EC
chr13	11366183	11366583	Peak9710	-1.40753	0.00026242	4.19368	5.19068	6.02687	LO_EC
chr13	114078479	114078879	Peak9724	-1.05335	0.00216594	4.55845	5.17108	6.06729	LO_EC
chr13	114374657	114375057	Peak9731	-0.71676	0.0434522	3.46563	4.39954	4.97553	LO_EC
chr13	114640932	114641332	Peak9745	-1.48275	0.000218288	3.94585	5.41656	5.86683	LO_EC
chr13	11465690	11466090	Peak9746	-0.772404	0.0345737	1.26508	4.32686	3.82242	LO_EC
chr13	118811739	118812139	Peak9785	-0.611443	0.0403286	5.42083	4.89968	6.33697	LO_EC
chr13	119054558	119054958	Peak9789	-1.07858	0.00100308	4.85073	5.5644	6.32506	LO_EC
chr13	11957463	11957863	Peak9793	-0.80383	0.0329072	2.40558	3.94858	4.41452	LO_EC
chr13	17934952	17935352	Peak9869	-0.979857	0.0089334	3.8007	4.50175	5.46629	LO_EC
chr13	19229793	19230193	Peak9883	-1.29295	0.000130539	4.72601	5.84858	6.35745	LO_EC
chr13	19269470	19269870	Peak9884	-1.12276	0.00756883	2.94392	4.56632	4.98836	LO_EC
chr13	20692181	20692581	Peak9905	-1.45248	0.00338283	1.75109	5.23107	4.49845	LO_EC
chr13	21808000	21808400	Peak9936	-1.19577	5.14308e-05	5.11256	7.33146	6.57892	LO_EC
chr13	21879032	21879432	Peak9942	-0.603644	0.01217	6.49958	7.43863	7.25947	LO_EC
chr13	22798757	22799157	Peak9973	-1.17371	0.00363641	3.64327	3.94821	5.50516	LO_EC
chr13	22936136	22936536	Peak9975	-0.88341	0.0137226	3.80141	5.17123	5.32909	LO_EC
chr13	23529796	23530196	Peak9992	-0.759937	0.0284946	3.80426	5.32785	5.20518	LO_EC
chr13	23635117	23635517	Peak10007	-0.756531	0.00933855	5.23088	6.29918	6.30213	LO_EC
chr13	23663016	23663416	Peak10010	-0.715343	0.00255178	6.15369	7.64527	7.04437	LO_EC
chr13	23677660	23678060	Peak10014	-0.674714	0.0259431	5.09336	6.79728	6.1199	LO_EC
chr13	23853033	23853433	Peak10024	-1.04055	7.53107e-06	6.13588	7.43781	7.35729	LO_EC
chr13	24958621	24959021	Peak10045	-0.772867	0.0304885	3.53189	4.46771	5.05445	LO_EC
chr13	25065754	25066154	Peak10049	-0.711774	0.0465367	3.03449	4.99552	4.61546	LO_EC
chr13	25731587	25731987	Peak10057	-0.88045	0.0015199	5.61743	6.00785	6.7833	LO_EC
chr13	28810309	28810709	Peak10067	-2.4348	5.42502e-06	2.53189	6.0531	5.59198	LO_EC
chr13	28936380	28936780	Peak10071	-1.57542	0.00241353	0.526734	5.51724	4.36262	LO_EC
chr13	29049800	29050200	Peak10076	-0.656212	0.0365168	4.67332	6.04158	5.71828	LO_EC
chr13	34254683	34255083	Peak10138	-0.61037	0.042344	5.19124	6.34594	6.11367	LO_EC
chr13	34379436	34379836	Peak10141	-1.41655	8.90471e-05	4.26868	6.57249	6.02956	LO_EC
chr13	37949503	37949903	Peak10195	-0.830305	0.00659324	4.75183	6.54917	5.95577	LO_EC
chr13	38021959	38022359	Peak10196	-1.12144	0.00518449	3.46563	4.92275	5.32219	LO_EC
chr13	38200984	38201384	Peak10203	-0.860774	0.000206627	6.23022	7.12894	7.27698	LO_EC
chr13	41315597	41315997	Peak10250	-0.607926	0.0239597	5.89957	6.76888	6.7229	LO_EC
chr13	4154552	4154952	Peak10254	-0.737806	0.024245	4.52803	5.10733	5.75389	LO_EC
chr13	4182329	4182729	Peak10258	-1.07519	0.0110155	2.64961	3.56368	4.84632	LO_EC
chr13	43356652	43357052	Peak10277	-0.822955	0.00800807	4.85038	6.12927	6.06962	LO_EC
chr13	43576362	43576762	Peak10285	-0.902021	0.00829746	4.15383	5.9234	5.58315	LO_EC
chr13	4400063	4400463	Peak10298	-1.03658	0.0139117	2.11399	3.21124	4.54142	LO_EC
chr13	44458186	44458586	Peak10304	-0.866376	0.0191513	3.2692	5.61181	4.90224	LO_EC
chr13	44773606	44774006	Peak10315	-0.74295	0.017105	4.87477	5.34517	6.01596	LO_EC
chr13	44774738	44775138	Peak10316	-2.22928	2.66797e-08	3.94263	5.54905	6.46942	LO_EC
chr13	44907668	44908068	Peak10326	-0.713293	0.0353529	4.19585	4.56416	5.49007	LO_EC
chr13	45034823	45035223	Peak10328	-0.794438	0.0163724	4.53017	4.28896	5.8242	LO_EC
chr13	45097373	45097773	Peak10330	-0.739548	0.0216888	4.64287	5.53354	5.83264	LO_EC
chr13	45126177	45126577	Peak10331	-0.694035	0.0453297	3.64723	4.94839	5.01908	LO_EC
chr13	4558411	4558811	Peak10334	-0.834822	0.0243089	3.19151	4.74112	4.86983	LO_EC
chr13	47950912	47951312	Peak10378	-0.792321	0.00868236	5.13348	5.74229	6.28345	LO_EC
chr13	48226138	48226538	Peak10379	-0.716152	0.0333114	3.98992	5.50075	5.26487	LO_EC
chr13	48356065	48356465	Peak10386	-0.659182	0.0144231	5.69991	6.84912	6.58996	LO_EC
chr13	48419607	48420007	Peak10389	-1.05208	0.00431635	3.94328	5.84749	5.56983	LO_EC
chr13	48641701	48642101	Peak10395	-0.674144	0.00786359	6.08498	7.30861	6.96028	LO_EC
chr13	48966043	48966443	Peak10406	-0.959364	0.0143342	3.11513	4.94711	4.96259	LO_EC
chr13	49415406	49415806	Peak10422	-0.715527	0.0469718	2.85553	4.8745	4.50739	LO_EC
chr13	51060376	51060776	Peak10433	-1.01902	0.0131227	2.40745	5.19099	4.50293	LO_EC
chr13	51298842	51299242	Peak10441	-0.826057	0.0174741	4.11342	4.39928	5.5436	LO_EC
chr13	51941328	51941728	Peak10458	-0.775079	0.00848162	4.92102	6.97803	6.02956	LO_EC
chr13	52016188	52016588	Peak10460	-2.09031	1.63453e-08	3.9465	7.53336	6.27502	LO_EC
chr13	52448621	52449021	Peak10469	-1.85491	0.000839119	1.75697	5.08521	4.79447	LO_EC
chr13	52975312	52975712	Peak10477	-0.945295	0.00708356	4.07066	5.84858	5.56828	LO_EC
chr13	53044569	53044969	Peak10480	-0.705989	0.030369	4.4987	4.94784	5.68284	LO_EC
chr13	54472772	54473172	Peak10513	-0.624471	0.0251895	5.48426	6.88064	6.35498	LO_EC
chr13	54850705	54851105	Peak10529	-0.752693	0.0322908	3.53017	5.36339	4.98602	LO_EC
chr13	55546338	55546738	Peak10565	-0.704049	0.004319	6.03207	7.28415	6.92554	LO_EC
chr13	56623672	56624072	Peak10603	-0.631594	0.0380647	4.85107	6.67858	5.81883	LO_EC
chr13	56683437	56683837	Peak10605	-1.22319	0.000544224	4.30452	6.61164	5.92986	LO_EC
chr13	58230169	58230569	Peak10632	-0.674302	0.00834757	5.89874	7.18095	6.77709	LO_EC
chr13	58576821	58577221	Peak10649	-0.809541	0.015571	4.15327	6.06377	5.4742	LO_EC
chr13	59801478	59801878	Peak10683	-0.833906	0.0262458	1.26094	3.89759	4.06193	LO_EC
chr13	60278811	60279211	Peak10696	-0.64513	0.0094321	5.88865	7.95444	6.70915	LO_EC
chr13	60703100	60703500	Peak10701	-1.18855	0.000664329	4.33605	6.32616	5.94024	LO_EC
chr13	62131501	62131901	Peak10710	-1.09166	0.0117503	1.75697	3.28954	4.45079	LO_EC
chr13	62283560	62283960	Peak10714	-1.56708	6.20564e-05	4.22876	5.25092	6.16246	LO_EC
chr13	62320604	62321004	Peak10715	-1.15944	0.00387799	3.587	4.84966	5.43979	LO_EC
chr13	62323109	62323509	Peak10716	-1.30148	0.00453589	2.53017	4.17139	4.88019	LO_EC
chr13	62329819	62330219	Peak10717	-1.90742	0.000605051	2.11628	3.84986	5.08978	LO_EC
chr13	62491730	62492130	Peak10722	-1.9295	2.04297e-05	3.75404	3.50175	6.10231	LO_EC
chr13	62917076	62917476	Peak10732	-0.755564	0.0192555	4.64525	5.08538	5.86034	LO_EC
chr13	63642776	63643176	Peak10756	-0.801506	0.0264719	3.26714	5.84986	4.84021	LO_EC
chr13	64081288	64081688	Peak10765	-1.02832	0.000204166	5.26714	7.15496	6.56215	LO_EC
chr13	64254468	64254868	Peak10770	-0.815841	0.000188774	6.46821	7.74484	7.44398	LO_EC
chr13	64262868	64263268	Peak10771	-0.74353	0.00304812	5.91157	7.11797	6.86422	LO_EC
chr13	64413733	64414133	Peak10774	-0.686531	0.0160233	5.40628	6.59638	6.37488	LO_EC
chr13	65412702	65413102	Peak10786	-0.868503	0.00701833	4.587	6.01842	5.88955	LO_EC
chr13	66648848	66649248	Peak10800	-0.642889	0.0338236	0	3.90025	3.64005	LO_EC
chr13	6674129	6674529	Peak10802	-1.09896	0.00825227	2.85279	4.74133	4.87329	LO_EC
chr13	66781699	66782099	Peak10804	-1.27848	0.00142971	3.70048	5.43416	5.54793	LO_EC
chr13	66799065	66799465	Peak10805	-0.619068	0.0110128	6.39613	7.08642	7.17788	LO_EC
chr13	67843836	67844236	Peak10834	-0.839551	0.0272695	2.64327	4.43337	4.55325	LO_EC
chr13	6828135	6828535	Peak10844	-0.706273	0.0383669	4.15215	4.502	5.46629	LO_EC
chr13	69725222	69725622	Peak10852	-0.973467	0.00544501	4.1555	5.38165	5.66206	LO_EC
chr13	7169154	7169554	Peak10866	-1.48855	0.000881727	3.26714	5.23213	5.39604	LO_EC
chr13	72765972	72766372	Peak10871	-0.700647	0.00900655	5.66073	7.16062	6.60224	LO_EC
chr13	72952622	72953022	Peak10873	-1.64793	0.000556502	2.74814	6.46797	5.07263	LO_EC
chr13	73829942	73830342	Peak10894	-0.710561	0.0146397	5.19205	6.61147	6.21612	LO_EC
chr13	74478524	74478924	Peak10913	-0.702998	0.0470666	3.26611	4.82298	4.76223	LO_EC
chr13	78163984	78164384	Peak10960	-1.00833	0.0110796	3.19693	4.59673	5.06962	LO_EC
chr13	81022387	81022787	Peak10979	-0.726107	0.0125614	5.19287	6.77678	6.23435	LO_EC
chr13	83662652	83663052	Peak11005	-0.735414	0.0441738	2.39995	4.94747	4.25429	LO_EC
chr13	84376446	84376846	Peak11015	-0.859192	0.0126489	4.19205	4.94895	5.61076	LO_EC
chr13	84710974	84711374	Peak11021	-1.03662	0.00516947	3.85141	5.10782	5.49457	LO_EC
chr13	94269430	94269830	Peak11109	-0.787537	0.00685239	5.19124	6.45901	6.3012	LO_EC
chr13	95613022	95613422	Peak11129	-1.24472	0.00452953	2.84866	5.10881	4.99154	LO_EC
chr13	96304085	96304485	Peak11158	-0.975063	0.00159395	4.87612	6.79718	6.21029	LO_EC
chr13	9763768	9764168	Peak11183	-1.06951	0.00202148	4.46832	5.57923	5.99906	LO_EC
chr13	98010880	98011280	Peak11199	-0.808874	0.00196752	5.64624	7.04679	6.69534	LO_EC
chr13	98090346	98090746	Peak11205	-0.96159	0.0175736	2.26508	4.53379	4.45417	LO_EC
chr13	98224671	98225071	Peak11211	-0.888737	0.021764	2.74962	4.5005	4.65806	LO_EC
chr13	99810167	99810567	Peak11255	-0.696735	0.0402822	4.07361	4.59556	5.3682	LO_EC
chr14	100342366	100342766	Peak11262	-1.22929	0.00736823	1.94778	4.1695	4.59996	LO_EC
chr14	100683868	100684268	Peak11271	-0.652496	0.00900655	6.2128	6.91842	7.04799	LO_EC
chr14	103458716	103459116	Peak11297	-0.78381	0.0242859	3.94585	4.62674	5.35835	LO_EC
chr14	103928977	103929377	Peak11305	-0.79994	0.0334675	2.26301	4.53231	4.32541	LO_EC
chr14	104867052	104867452	Peak11316	-0.627319	0.0338943	5.17472	6.27051	6.10231	LO_EC
chr14	105076019	105076419	Peak11318	-0.881616	0.023891	1.26508	5.04097	3.86288	LO_EC
chr14	106250594	106250994	Peak11334	-1.33965	0.00014359	4.50308	6.49313	6.19591	LO_EC
chr14	106296421	106296821	Peak11339	-0.695211	0.00743142	5.73916	7.41232	6.65358	LO_EC
chr14	110171496	110171896	Peak11348	-0.666671	0.0497489	4.19097	4.21155	5.46233	LO_EC
chr14	118329678	118330078	Peak11375	-1.34611	0.000100709	4.82558	6.28115	6.50739	LO_EC
chr14	118629737	118630137	Peak11384	-2.6089	2.8012e-06	2.40558	4.82398	5.74258	LO_EC
chr14	118774040	118774440	Peak11389	-0.676293	0.0470666	4.33851	3.90177	5.61434	LO_EC
chr14	119096103	119096503	Peak11402	-0.634465	0.0412895	4.87544	5.6264	5.88191	LO_EC
chr14	119336796	119337196	Peak11414	-0.64031	0.00600462	6.38685	7.6262	7.17928	LO_EC
chr14	11993256	11993656	Peak11422	-0.781855	0.0317623	3.19151	4.71472	4.82599	LO_EC
chr14	120694953	120695353	Peak11428	-0.833339	0.0287433	2.52845	3.6854	4.53269	LO_EC
chr14	120705447	120705847	Peak11429	-0.712566	0.0388089	3.85347	4.7132	5.2134	LO_EC
chr14	120772897	120773297	Peak11432	-0.924503	0.020467	2.5336	3.68275	4.68875	LO_EC
chr14	121164939	121165339	Peak11436	-0.767339	0.0385903	2.26508	3.84789	4.31897	LO_EC
chr14	121165633	121166033	Peak11437	-1.12644	0.00142822	0	3.99676	4.14291	LO_EC
chr14	122864516	122864916	Peak11494	-0.844282	0.00446996	5.11742	6.6493	6.30505	LO_EC
chr14	124845344	124845744	Peak11515	-0.686555	0.0492815	3.69972	3.79682	5.1126	LO_EC
chr14	12795087	12795487	Peak11527	-0.95344	0.00870718	4.15772	3.94931	5.7336	LO_EC
chr14	14845139	14845539	Peak11551	-0.812597	0.00431439	5.2862	6.53305	6.40172	LO_EC
chr14	15178058	15178458	Peak11558	-0.610422	0.0279917	5.67216	6.52554	6.51568	LO_EC
chr14	15179620	15180020	Peak11559	-1.60251	1.7228e-05	4.37028	5.89892	6.27764	LO_EC
chr14	16810873	16811273	Peak11571	-0.781111	0.00187997	6.02195	7.08076	7.02086	LO_EC
chr14	17267143	17267543	Peak11581	-0.912321	0.00248446	5.05269	6.07521	6.31585	LO_EC
chr14	17407882	17408282	Peak11583	-0.602219	0.0374117	5.58824	6.26149	6.45971	LO_EC
chr14	19164154	19164554	Peak11594	-0.870104	0.00855793	4.33704	5.96068	5.68284	LO_EC
chr14	19300329	19300729	Peak11597	-2.05572	0.000168674	2.40558	4.65547	5.27013	LO_EC
chr14	21553600	21554000	Peak11642	-1.06799	0.000780606	4.80212	6.41663	6.23838	LO_EC
chr14	22505509	22505909	Peak11668	-0.676065	0.043771	4.03207	5.5	5.25694	LO_EC
chr14	23988586	23988986	Peak11683	-1.33916	0.00389416	2.53189	4.65456	4.88955	LO_EC
chr14	25064377	25064777	Peak11692	-0.658402	0.0387692	4.6146	6.07445	5.69214	LO_EC
chr14	25073058	25073458	Peak11693	-0.630092	0.0221878	5.69895	6.46784	6.56536	LO_EC
chr14	25177733	25178133	Peak11694	-0.903764	0.0195499	2.94392	4.17076	4.81163	LO_EC
chr14	26480785	26481185	Peak11721	-1.84896	1.9728e-06	4.19151	6.05216	6.31585	LO_EC
chr14	26588461	26588861	Peak11725	-0.715864	0.0071911	5.76512	6.85483	6.72194	LO_EC
chr14	27160529	27160929	Peak11734	-0.767857	0.0380222	2.53017	4.50201	4.40976	LO_EC
chr14	28160439	28160839	Peak11766	-0.617439	0.029966	5.49892	6.76882	6.38009	LO_EC
chr14	28435336	28435736	Peak11771	-1.09761	0.000304773	5.03328	6.56428	6.44847	LO_EC
chr14	30608516	30608916	Peak11786	-0.657779	0.0441662	4.43638	5.01886	5.57041	LO_EC
chr14	30781299	30781699	Peak11788	-0.682541	0.00760346	6.1232	7.26593	7.01246	LO_EC
chr14	31467397	31467797	Peak11803	-0.719807	0.0294774	4.4987	5.66872	5.73169	LO_EC
chr14	31832108	31832508	Peak11810	-0.96355	0.00493479	4.40792	6.26112	5.86241	LO_EC
chr14	32199150	32199550	Peak11822	-0.923792	0.0210502	1.7599	4.53256	4.19213	LO_EC
chr14	35123625	35124025	Peak11880	-0.902785	4.82469e-05	6.24834	7.77919	7.31966	LO_EC
chr14	35404448	35404848	Peak11896	-0.73928	0.0279414	4.15104	5.62686	5.44615	LO_EC
chr14	35632883	35633283	Peak11906	-0.712642	0.030319	4.33704	5.72659	5.54735	LO_EC
chr14	41204075	41204475	Peak11937	-1.32299	0.00334531	3.03085	3.89797	5.24775	LO_EC
chr14	41262834	41263234	Peak11938	-2.83929	1.68769e-09	3.03328	5.12797	6.36541	LO_EC
chr14	42002806	42003206	Peak11952	-0.850214	0.011	4.46922	5.41643	5.81295	LO_EC
chr14	44390088	44390488	Peak11964	-0.756425	0.0382835	2.84866	5.25107	4.57156	LO_EC
chr14	46135547	46135947	Peak11985	-0.72569	0.0413693	3.53189	3.89911	5.05832	LO_EC
chr14	46170812	46171212	Peak11988	-1.39584	0.000712176	3.69972	5.21124	5.6267	LO_EC
chr14	46999958	47000358	Peak11993	-0.856096	0.0216021	3.11513	5.19114	4.79811	LO_EC
chr14	47504385	47504785	Peak12007	-0.712876	0.0459591	3.19368	4.9495	4.76697	LO_EC
chr14	49320633	49321033	Peak12040	-0.850842	0.00667082	4.80284	6.92452	6.06742	LO_EC
chr14	49920896	49921296	Peak12052	-1.27306	0.00248446	3.33507	5.21201	5.29991	LO_EC
chr14	49981781	49982181	Peak12053	-1.34564	0.000966168	3.80355	4.84946	5.69606	LO_EC
chr14	50144812	50145212	Peak12055	-0.837017	0.00653949	4.75036	6.58836	5.97157	LO_EC
chr14	52054218	52054618	Peak12082	-2.47663	2.02899e-08	3.33704	6.17123	6.20143	LO_EC
chr14	52504320	52504720	Peak12084	-0.64713	0.0166577	5.82942	6.83638	6.70483	LO_EC
chr14	52686021	52686421	Peak12097	-0.808605	0.00560947	5.15411	6.34545	6.28734	LO_EC
chr14	54450429	54450829	Peak12117	-1.46353	0.00309272	2.11856	3.94747	4.80175	LO_EC
chr14	55191630	55192030	Peak12142	-1.09868	0.000646067	4.80284	6.28845	6.2632	LO_EC
chr14	56254317	56254717	Peak12201	-0.638648	0.0494383	4.55718	5.48496	5.65001	LO_EC
chr14	56332222	56332622	Peak12205	-0.782236	0.0249626	3.69972	5.45078	5.12057	LO_EC
chr14	56442149	56442549	Peak12214	-0.689911	0.00789767	5.8289	7.13406	6.72953	LO_EC
chr14	56503554	56503954	Peak12220	-0.877614	0.00279275	4.98835	7.06377	6.19138	LO_EC
chr14	57452137	57452537	Peak12235	-0.750159	0.0316573	3.64565	5.23152	5.06962	LO_EC
chr14	58156097	58156497	Peak12248	-0.835971	0.00782588	4.61662	6.33619	5.85987	LO_EC
chr14	58275308	58275708	Peak12250	-1.51735	0.00167171	2.75109	4.29012	5.13716	LO_EC
chr14	58553452	58553852	Peak12267	-1.36138	0.00304725	2.85141	3.94674	5.12928	LO_EC
chr14	60244035	60244435	Peak12281	-0.983904	0.00191163	4.72451	6.5496	6.09344	LO_EC
chr14	61460849	61461249	Peak12306	-0.84403	0.0262458	2.94134	4.21247	4.80077	LO_EC
chr14	62267427	62267827	Peak12329	-0.748635	0.00873878	5.28519	6.65659	6.3332	LO_EC
chr14	63556373	63556773	Peak12347	-0.661478	0.0490622	4.15383	4.59603	5.37244	LO_EC
chr14	64079628	64080028	Peak12357	-0.744661	0.0287857	3.85004	5.69948	5.18379	LO_EC
chr14	64119044	64119444	Peak12360	-0.731631	0.00250041	6.26739	6.69948	7.18815	LO_EC
chr14	64782462	64782862	Peak12376	-0.947318	0.0152281	2.8569	5.5965	4.70333	LO_EC
chr14	65165622	65166022	Peak12382	-0.905875	0.0152281	3.40277	5.107	5.07564	LO_EC
chr14	65213780	65214180	Peak12386	-1.10208	0.000125064	5.61905	5.43377	6.99271	LO_EC
chr14	65792202	65792602	Peak12399	-0.92039	0.0206095	2.26301	4.89949	4.39187	LO_EC
chr14	65950775	65951175	Peak12403	-1.38292	0.000892468	3.339	6.39015	5.2825	LO_EC
chr14	65977147	65977547	Peak12405	-0.605661	0.0200224	5.85159	7.34065	6.64422	LO_EC
chr14	70591858	70592258	Peak12494	-1.49538	0.000608409	3.46922	5.62732	5.53983	LO_EC
chr14	72906504	72906904	Peak12526	-0.701601	0.0480132	3.11628	5.12862	4.63488	LO_EC
chr14	75464333	75464733	Peak12554	-1.58663	0.000825899	3.19042	4.62835	5.49232	LO_EC
chr14	75530508	75530908	Peak12555	-0.758158	0.0337078	3.19368	5.61158	4.7303	LO_EC
chr14	76481161	76481561	Peak12579	-0.60868	0.0382607	5.55887	4.84808	6.45279	LO_EC
chr14	76654855	76655255	Peak12583	-0.737212	0.0328204	3.702	6.03083	5.08463	LO_EC
chr14	76679267	76679667	Peak12585	-1.10651	0.011057	1.75697	4.79559	4.30505	LO_EC
chr14	76814254	76814654	Peak12587	-0.695979	0.012069	5.51647	6.76955	6.4714	LO_EC
chr14	76956095	76956495	Peak12598	-0.755838	0.0272535	4.02964	5.1496	5.38153	LO_EC
chr14	78173183	78173583	Peak12618	-1.18665	0.00515238	3.02964	4.74133	5.0666	LO_EC
chr14	78688828	78689228	Peak12623	-0.938129	0.00136321	5.26817	6.77673	6.53139	LO_EC
chr14	79133479	79133879	Peak12636	-0.818501	0.0173365	4.11227	5.32587	5.51184	LO_EC
chr14	79250490	79250890	Peak12641	-1.20803	0.00125405	4.19476	5.64231	5.90192	LO_EC
chr14	79983456	79983856	Peak12659	-0.632699	0.0441567	5.0093	5.51774	6.03462	LO_EC
chr14	86795845	86796245	Peak12681	-0.710228	0.0108209	5.58824	6.29918	6.56963	LO_EC
chr14	86844073	86844473	Peak12684	-0.76175	0.0284946	3.8521	4.74091	5.26223	LO_EC
chr14	87486594	87486994	Peak12690	-0.802689	0.0223001	4.07538	3.6249	5.5201	LO_EC
chr14	87487909	87488309	Peak12691	-1.61941	0.00063602	3.26404	3.90025	5.55756	LO_EC
chr14	87701304	87701704	Peak12698	-0.87527	0.0247044	2.40183	3.84789	4.50293	LO_EC
chr14	9046390	9046790	Peak12722	-0.611072	0.0163685	6.1555	7.23054	6.94989	LO_EC
chr14	99445316	99445716	Peak12757	-0.928346	0.000204166	6.03191	7.0739	7.17821	LO_EC
chr15	100058014	100058414	Peak12775	-0.652394	0.0374845	4.98679	6.09789	6.03266	LO_EC
chr15	100111168	100111568	Peak12781	-0.800553	0.0202452	4.1516	4.79621	5.54577	LO_EC
chr15	100325460	100325860	Peak12792	-0.635565	0.0112533	6.1356	7.13971	6.95376	LO_EC
chr15	100371391	100371791	Peak12794	-1.21846	0.000759604	4.46832	4.39847	6.13073	LO_EC
chr15	100458174	100458574	Peak12798	-0.755668	0.0284231	3.94521	5.53293	5.33297	LO_EC
chr15	100703548	100703948	Peak12809	-0.786179	0.0318973	3.18934	4.87314	4.87422	LO_EC
chr15	101004170	101004570	Peak12825	-1.52285	2.97428e-05	4.37363	6.33583	6.20518	LO_EC
chr15	101064117	101064517	Peak12833	-1.97982	2.84858e-06	3.85073	5.48471	6.1635	LO_EC
chr15	101076690	101077090	Peak12837	-0.627881	0.0428055	6.21159	7.39958	7.20405	LO_EC
chr15	101904066	101904466	Peak12860	-0.685174	0.012069	5.75238	6.84323	6.68508	LO_EC
chr15	101987333	101987733	Peak12863	-0.895873	0.0147762	3.46743	5.34531	5.07483	LO_EC
chr15	10553553	10553953	Peak12953	-0.914714	0.0218109	1.75404	4.17076	4.18658	LO_EC
chr15	12777916	12778316	Peak13005	-0.713774	0.043949	3.33605	4.79621	4.83216	LO_EC
chr15	13322878	13323278	Peak13018	-1.7243	0.000998983	2.26508	4.65592	4.96671	LO_EC
chr15	25294495	25294895	Peak13044	-0.927624	0.00641732	4.61986	5.21262	6.05375	LO_EC
chr15	25742197	25742597	Peak13061	-0.81194	0.0238269	3.47011	5.51612	5.00423	LO_EC
chr15	25780380	25780780	Peak13065	-0.776593	0.0326619	3.11399	4.84867	4.74068	LO_EC
chr15	27511382	27511782	Peak13075	-0.725377	0.0186377	4.85244	6.201	5.95206	LO_EC
chr15	31153881	31154281	Peak13108	-0.672652	0.0132312	5.65975	6.74155	6.56799	LO_EC
chr15	31224093	31224493	Peak13113	-0.793407	0.0308292	3.02964	4.87353	4.7188	LO_EC
chr15	31268251	31268651	Peak13117	-1.17864	0.00675122	2.84729	4.25182	5.03771	LO_EC
chr15	31309190	31309590	Peak13120	-1.92926	0.000808107	0.526734	4.03994	4.8286	LO_EC
chr15	31371478	31371878	Peak13123	-1.06196	0.0121929	2.40745	3.6272	4.70438	LO_EC
chr15	31460676	31461076	Peak13125	-0.763123	0.0139998	4.85107	6.43482	6.01168	LO_EC
chr15	34167637	34168037	Peak13147	-0.674265	0.0284763	4.72676	6.35445	5.76968	LO_EC
chr15	34799369	34799769	Peak13158	-1.29629	0.00305805	3.11742	4.50075	5.20992	LO_EC
chr15	36574776	36575176	Peak13193	-1.03727	0.0124255	2.53531	4.68562	4.66606	LO_EC
chr15	36788476	36788876	Peak13204	-1.17335	0.00879838	1.2774	4.25003	4.29476	LO_EC
chr15	36858780	36859180	Peak13206	-1.02378	0.0131487	2.39807	5.12911	4.54142	LO_EC
chr15	36859652	36860052	Peak13207	-2.11328	0.000479999	0.94005	4.97179	4.80802	LO_EC
chr15	36921097	36921497	Peak13212	-0.810859	0.00701833	5.11542	5.87334	6.2812	LO_EC
chr15	36936972	36937372	Peak13213	-0.70358	0.00250601	6.27645	7.44236	7.14363	LO_EC
chr15	36975333	36975733	Peak13215	-0.882	0.0196786	3.26817	3.94821	5.00968	LO_EC
chr15	38228694	38229094	Peak13241	-1.0492	2.43663e-05	5.83977	7.4633	7.09848	LO_EC
chr15	38387998	38388398	Peak13248	-0.796226	0.0243133	3.94842	4.3982	5.42163	LO_EC
chr15	38837632	38838032	Peak13260	-1.47474	0.000279011	3.69742	6.27029	5.63079	LO_EC
chr15	38908226	38908626	Peak13261	-1.06335	0.00367914	3.84935	6.04184	5.47254	LO_EC
chr15	39963872	39964272	Peak13280	-0.722815	0.0468858	2.64802	4.12748	4.46338	LO_EC
chr15	41022312	41022712	Peak13282	-0.734443	0.027922	4.37076	4.87527	5.64504	LO_EC
chr15	41697627	41698027	Peak13291	-0.927889	0.0119398	3.69895	4.56488	5.31712	LO_EC
chr15	4973545	4973945	Peak13320	-1.74115	2.85783e-05	4.03146	5.06462	6.1386	LO_EC
chr15	5186497	5186897	Peak13344	-0.712042	0.0493904	2.40183	4.53428	4.27013	LO_EC
chr15	51868556	51868956	Peak13345	-1.30724	0.00290041	3.03085	4.92406	5.13794	LO_EC
chr15	58137864	58138264	Peak13412	-0.793434	0.0267736	3.52845	4.97305	5.0575	LO_EC
chr15	58913578	58913978	Peak13426	-0.688486	0.00928477	5.88714	7.30911	6.80447	LO_EC
chr15	59019802	59020202	Peak13430	-0.654152	0.0459271	4.33655	5.41589	5.47025	LO_EC
chr15	59133771	59134171	Peak13432	-1.31497	7.53107e-06	5.50089	5.61054	7.04437	LO_EC
chr15	61816884	61817284	Peak13456	-0.76642	0.00298939	5.81425	7.33203	6.80941	LO_EC
chr15	7079430	7079830	Peak13526	-0.614377	0.0236309	5.72563	6.91739	6.55678	LO_EC
chr15	71988991	71989391	Peak13534	-0.699935	0.0452933	3.53017	4.76893	4.94803	LO_EC
chr15	72640288	72640688	Peak13543	-0.809573	0.0146112	4.33851	5.5952	5.64651	LO_EC
chr15	73476051	73476451	Peak13566	-0.662395	0.0232333	5.1926	6.47598	6.14968	LO_EC
chr15	73555008	73555408	Peak13572	-1.69708	5.95678e-05	3.70124	6.10675	5.80175	LO_EC
chr15	74630181	74630581	Peak13601	-0.760619	0.0256825	4.15661	4.84789	5.49906	LO_EC
chr15	75578669	75579069	Peak13618	-0.703494	0.00147269	6.51539	7.63718	7.36295	LO_EC
chr15	75921964	75922364	Peak13641	-0.741776	0.00608392	5.48381	7.19651	6.48164	LO_EC
chr15	76069527	76069927	Peak13650	-0.760241	0.0270438	3.85347	5.46707	5.21811	LO_EC
chr15	76490323	76490723	Peak13679	-0.737457	0.00251277	6.11456	7.21132	7.04764	LO_EC
chr15	76755855	76756255	Peak13696	-0.604542	0.0381573	5.21293	6.72104	6.09087	LO_EC
chr15	77032612	77033012	Peak13710	-0.812193	0.0209159	3.94328	4.59556	5.40085	LO_EC
chr15	77185756	77186156	Peak13718	-0.613805	0.0419374	5.31764	5.67073	6.248	LO_EC
chr15	77189057	77189457	Peak13720	-0.623287	0.0204897	6.02302	6.72169	6.86446	LO_EC
chr15	77693575	77693975	Peak13736	-1.18573	0.00587479	2.64486	5.51736	4.75576	LO_EC
chr15	77713265	77713665	Peak13738	-0.74048	0.0373541	3.26611	5.28925	4.78446	LO_EC
chr15	77831820	77832220	Peak13745	-0.707036	0.0242525	4.82593	5.54869	5.93859	LO_EC
chr15	79187963	79188363	Peak13810	-0.7742	0.0167359	4.46922	5.62628	5.70385	LO_EC
chr15	79435498	79435898	Peak13828	-0.919931	0.00304799	4.75404	6.49281	6.05293	LO_EC
chr15	79501049	79501449	Peak13833	-0.745208	0.0171313	4.82907	5.94904	5.97962	LO_EC
chr15	79735516	79735916	Peak13848	-0.712037	0.0251677	4.87747	5.08437	6.01596	LO_EC
chr15	79921523	79921923	Peak13860	-0.736539	0.00809874	5.53017	6.52529	6.54389	LO_EC
chr15	81344694	81345094	Peak13908	-0.626242	0.0154341	5.87527	7.19592	6.69534	LO_EC
chr15	81415774	81416174	Peak13912	-0.795862	0.0051574	5.33556	6.78341	6.4348	LO_EC
chr15	81799776	81800176	Peak13935	-0.620576	0.0339528	5.40394	5.80885	6.31237	LO_EC
chr15	81820111	81820511	Peak13936	-0.873057	0.0206095	3.1117	4.92368	4.84983	LO_EC
chr15	82169159	82169559	Peak13953	-0.649168	0.0173762	5.54565	7.08026	6.43394	LO_EC
chr15	8229361	8229761	Peak13957	-0.750904	0.0391543	2.85141	4.79621	4.5501	LO_EC
chr15	82337442	82337842	Peak13959	-2.72085	7.13819e-06	1.75404	5.17155	5.49232	LO_EC
chr15	83903719	83904119	Peak14004	-0.867664	0.0195194	3.26817	5.19177	4.93573	LO_EC
chr15	83927984	83928384	Peak14007	-1.12746	0.00817252	2.64644	4.76997	4.78078	LO_EC
chr15	84066059	84066459	Peak14019	-1.13351	0.00171469	4.37315	4.46771	5.99473	LO_EC
chr15	84484646	84485046	Peak14031	-1.11268	0.00432957	3.58948	6.08747	5.36082	LO_EC
chr15	85456116	85456516	Peak14068	-1.33349	0.000872612	3.75183	5.53342	5.60868	LO_EC
chr15	85464878	85465278	Peak14069	-0.614242	0.00782437	6.63695	7.48864	7.39243	LO_EC
chr15	8781942	8782342	Peak14111	-0.684608	0.0202452	5.26637	5.82228	6.2675	LO_EC
chr15	9069981	9070381	Peak14171	-0.684833	0.00900655	6.05179	7.09156	6.9611	LO_EC
chr15	9142790	9143190	Peak14180	-0.842974	0.00233107	5.71103	6.39042	6.83909	LO_EC
chr15	96117020	96117420	Peak14241	-0.850911	0.00205733	5.49848	6.69174	6.62977	LO_EC
chr15	96956744	96957144	Peak14268	-1.12077	0.00647713	3.26404	4.53452	5.21612	LO_EC
chr15	96997555	96997955	Peak14269	-0.977884	0.00515238	4.23088	5.23046	5.7374	LO_EC
chr15	97065697	97066097	Peak14271	-0.671739	0.0492351	4.07479	4.28779	5.3682	LO_EC
chr15	97163001	97163401	Peak14275	-0.860699	0.0100938	4.56097	4.25003	5.92076	LO_EC
chr15	97488419	97488819	Peak14288	-0.951126	0.0186021	2.26508	3.79518	4.50739	LO_EC
chr15	97938746	97939146	Peak14310	-0.675769	0.0335387	4.43866	6.33619	5.53488	LO_EC
chr15	98398066	98398466	Peak14320	-0.625965	0.0145884	6.12476	7.15584	6.94189	LO_EC
chr15	98764742	98765142	Peak14352	-0.909098	0.000608409	5.54608	7.15472	6.70553	LO_EC
chr15	98905084	98905484	Peak14365	-0.630744	0.0350922	4.94392	6.79641	5.89513	LO_EC
chr15	99251421	99251821	Peak14384	-1.05033	0.00369474	4.03691	5.91173	5.63079	LO_EC
chr15	99636685	99637085	Peak14405	-1.40056	0.00290041	2.53017	4.71342	4.89296	LO_EC
chr16	10170103	10170503	Peak14420	-1.15211	0.0047768	3.46922	4.39954	5.37798	LO_EC
chr16	10411878	10412278	Peak14430	-0.783304	0.00636651	5.23088	6.48452	6.32346	LO_EC
chr16	11008272	11008672	Peak14451	-0.742948	0.011	5.17307	6.6489	6.22958	LO_EC
chr16	11017939	11018339	Peak14452	-0.768901	0.0244567	4.15828	5.08588	5.50739	LO_EC
chr16	11066139	11066539	Peak14455	-0.726637	0.00600462	5.76384	7.27969	6.73125	LO_EC
chr16	11295659	11296059	Peak14460	-0.656693	0.0358214	4.77828	5.56464	5.8242	LO_EC
chr16	11450703	11451103	Peak14463	-1.63084	0.00129694	2.52845	4.12943	5.09195	LO_EC
chr16	13014109	13014509	Peak14473	-1.15142	0.00883838	2.27125	4.94931	4.62559	LO_EC
chr16	13748881	13749281	Peak14492	-0.791657	0.00245503	5.75109	6.91168	6.78028	LO_EC
chr16	13754430	13754830	Peak14493	-0.649303	0.0269664	5.13405	6.58789	6.08531	LO_EC
chr16	14159304	14159704	Peak14509	-0.73695	0.0125543	5.30427	6.52566	6.37554	LO_EC
chr16	16870702	16871102	Peak14545	-0.704256	0.0136182	5.3363	6.47617	6.33069	LO_EC
chr16	17124144	17124544	Peak14555	-1.06857	0.00861841	2.85553	5.72777	4.77979	LO_EC
chr16	17254319	17254719	Peak14566	-0.735358	0.0339024	3.69972	5.46669	5.086	LO_EC
chr16	17558951	17559351	Peak14576	-0.696765	0.0366964	4.0357	5.94821	5.2675	LO_EC
chr16	17561262	17561662	Peak14577	-0.652473	0.0262458	5.09423	6.62622	6.04723	LO_EC
chr16	17619361	17619761	Peak14580	-1.21262	0.00350146	3.26817	5.04149	5.20792	LO_EC
chr16	17759500	17759900	Peak14585	-0.732024	0.0163316	4.80212	6.43377	5.90316	LO_EC
chr16	20098051	20098451	Peak14637	-0.865866	0.00038805	5.94457	7.41242	7.0183	LO_EC
chr16	20672609	20673009	Peak14664	-0.735904	0.00694685	5.63181	6.53372	6.62595	LO_EC
chr16	20791906	20792306	Peak14673	-0.915915	0.00440002	4.67294	6.029	6.01125	LO_EC
chr16	20836853	20837253	Peak14676	-1.41983	0.00369474	1.94778	4.56536	4.63895	LO_EC
chr16	21192664	21193064	Peak14679	-0.929143	0.0178749	2.9465	4.08755	4.87674	LO_EC
chr16	21470021	21470421	Peak14694	-1.84963	0.000678626	0	3.04063	5.03688	LO_EC
chr16	21653227	21653627	Peak14697	-1.755	0.00151343	0.950351	3.62582	4.68875	LO_EC
chr16	21794205	21794605	Peak14701	-0.698714	0.023469	4.82942	6.13947	5.90316	LO_EC
chr16	22009197	22009597	Peak14708	-0.660802	0.00636276	6.28531	7.35937	7.11878	LO_EC
chr16	22439600	22440000	Peak14728	-0.642324	0.00326351	6.68745	7.8059	7.46071	LO_EC
chr16	22800473	22800873	Peak14739	-2.75994	1.68769e-09	3.03449	6.23114	6.24302	LO_EC
chr16	23030905	23031305	Peak14746	-0.860913	0.0179009	3.85416	3.62766	5.43277	LO_EC
chr16	29683071	29683471	Peak14796	-0.916656	0.00334531	4.77611	6.50964	6.08382	LO_EC
chr16	29720152	29720552	Peak14797	-1.81807	7.53107e-06	4.03328	5.46746	6.17298	LO_EC
chr16	30063166	30063566	Peak14812	-0.761641	0.00686628	5.49892	6.48502	6.54627	LO_EC
chr16	30206147	30206547	Peak14820	-2.07789	6.27062e-07	3.69589	6.75557	6.08789	LO_EC
chr16	30599606	30600006	Peak14838	-0.685586	0.0164748	5.32161	6.72029	6.29123	LO_EC
chr16	30939989	30940389	Peak14845	-0.827948	0.00358311	5.30201	6.37207	6.43362	LO_EC
chr16	31201196	31201596	Peak14851	-0.663848	0.00841971	6.03328	7.17104	6.8883	LO_EC
chr16	31489138	31489538	Peak14863	-1.01925	0.0125614	2.64486	4.92499	4.68087	LO_EC
chr16	31663723	31664123	Peak14867	-0.602683	0.027922	5.79097	6.88146	6.61593	LO_EC
chr16	31926656	31927056	Peak14875	-0.883547	0.00793804	4.55929	4.62628	5.92577	LO_EC
chr16	32643794	32644194	Peak14915	-0.728369	0.0142989	5.05418	6.37207	6.11327	LO_EC
chr16	32666339	32666739	Peak14916	-0.746303	0.0156546	4.77539	6.42506	5.90777	LO_EC
chr16	33184943	33185343	Peak14935	-0.688757	0.0226457	4.87544	6.53354	5.90777	LO_EC
chr16	33517268	33517668	Peak14948	-0.704251	0.0155603	5.22982	6.62686	6.24605	LO_EC
chr16	33979987	33980387	Peak14972	-0.669004	0.0354643	4.87645	4.39874	5.972	LO_EC
chr16	35363786	35364186	Peak15003	-0.723053	0.00931182	5.70219	6.9837	6.70075	LO_EC
chr16	35588018	35588418	Peak15009	-0.638395	0.0125614	6.08469	6.5493	6.91344	LO_EC
chr16	35729151	35729551	Peak15014	-0.854309	0.0106959	4.30301	5.4842	5.65806	LO_EC
chr16	36990346	36990746	Peak15052	-0.937628	0.0194064	2.40183	4.25182	4.56926	LO_EC
chr16	37683700	37684100	Peak15059	-1.10759	0.00565403	3.33704	4.8993	5.18658	LO_EC
chr16	38324413	38324813	Peak15077	-1.52058	0.0025261	2.11399	4.36352	4.8198	LO_EC
chr16	38447448	38447848	Peak15086	-0.74033	0.0256825	4.43454	4.87469	5.69267	LO_EC
chr16	38712704	38713104	Peak15100	-0.69909	0.0290532	4.50002	5.67084	5.64043	LO_EC
chr16	38945288	38945688	Peak15106	-0.768312	0.0333246	3.40651	3.89911	4.9979	LO_EC
chr16	4594215	4594615	Peak15196	-1.78896	2.85644e-06	4.19368	6.27029	6.25995	LO_EC
chr16	48355813	48356213	Peak15221	-1.08126	0.00951067	2.75256	4.36297	4.82956	LO_EC
chr16	48435612	48436012	Peak15224	-0.755769	0.0287026	3.94457	5.06479	5.3348	LO_EC
chr16	48479431	48479831	Peak15226	-0.784873	0.0338236	2.85141	4.68694	4.63488	LO_EC
chr16	48585555	48585955	Peak15228	-0.789755	0.0317268	3.26404	4.50251	4.97082	LO_EC
chr16	4907912	4908312	Peak15240	-0.877354	0.0235872	2.64327	4.62467	4.603	LO_EC
chr16	4938852	4939252	Peak15243	-0.648958	0.022613	5.37147	6.58054	6.28605	LO_EC
chr16	5352336	5352736	Peak15279	-0.751765	0.0150358	4.72863	6.51693	5.8703	LO_EC
chr16	56075375	56075775	Peak15298	-0.877338	0.00723307	4.46563	6.23107	5.79993	LO_EC
chr16	6206471	6206871	Peak15340	-1.59701	0.000931181	2.85141	4.99658	5.21066	LO_EC
chr16	67621023	67621423	Peak15367	-0.757164	0.00746191	5.45402	6.59608	6.50688	LO_EC
chr16	76294805	76295205	Peak15401	-0.818155	0.0284979	2.94134	4.62651	4.72161	LO_EC
chr16	76685822	76686222	Peak15406	-0.87638	0.0230306	2.75404	4.32658	4.65404	LO_EC
chr16	7797281	7797681	Peak15415	-0.816359	0.0233716	3.64406	5.10799	5.19288	LO_EC
chr16	78846285	78846685	Peak15426	-1.04695	0.00123125	4.85244	5.23152	6.28605	LO_EC
chr16	8379513	8379913	Peak15438	-0.876205	0.0241623	1.2692	4.94858	3.89729	LO_EC
chr16	8532973	8533373	Peak15460	-0.703238	0.027922	4.49958	5.79651	5.64043	LO_EC
chr16	8555480	8555880	Peak15463	-1.04841	0.00244422	4.49958	4.62651	6.01908	LO_EC
chr16	8562880	8563280	Peak15464	-1.16601	0.00131461	4.23035	5.32672	5.86809	LO_EC
chr16	8670118	8670518	Peak15473	-0.719795	0.0279574	4.19639	6.50138	5.4002	LO_EC
chr16	8829745	8830145	Peak15512	-0.663132	0.00304446	6.61009	7.6489	7.41867	LO_EC
chr16	89863423	89863823	Peak15518	-0.881019	0.00212636	5.49782	5.79672	6.68973	LO_EC
chr16	9016464	9016864	Peak15530	-1.82273	0.000655679	2.26094	5.01904	5.02759	LO_EC
chr16	90440927	90441327	Peak15548	-0.633225	0.044738	4.80248	5.65693	5.83134	LO_EC
chr16	90777400	90777800	Peak15562	-0.742493	0.042282	2.64961	4.68407	4.45079	LO_EC
chr16	91193077	91193477	Peak15575	-2.38903	4.31763e-05	2.1117	4.17044	5.4115	LO_EC
chr16	91200089	91200489	Peak15576	-2.53761	4.89023e-06	2.5336	4.28983	5.78997	LO_EC
chr16	91485151	91485551	Peak15587	-0.932785	7.1968e-05	6.11542	7.3584	7.24137	LO_EC
chr16	91562443	91562843	Peak15590	-1.0412	0.00504866	3.85141	5.2891	5.49171	LO_EC
chr16	91724456	91724856	Peak15596	-1.38746	0.000557861	3.94585	4.84907	5.82599	LO_EC
chr16	91765453	91765853	Peak15598	-0.856174	0.0181966	3.80213	4.53501	5.36754	LO_EC
chr16	9267222	9267622	Peak15632	-0.954846	0.00401607	4.56181	5.43337	5.97157	LO_EC
chr16	93795117	93795517	Peak15650	-1.46298	9.58958e-06	5.01114	5.49987	6.72978	LO_EC
chr16	94790915	94791315	Peak15686	-0.728179	0.0017123	6.36276	7.04115	7.25845	LO_EC
chr16	94853541	94853941	Peak15690	-0.914194	0.0218766	1.75404	4.82178	4.1256	LO_EC
chr16	95049737	95050137	Peak15700	-0.929	0.0132312	3.64882	4.17108	5.32725	LO_EC
chr16	95923983	95924383	Peak15709	-0.60093	0.0355481	5.43546	6.74224	6.29252	LO_EC
chr17	10343076	10343476	Peak15765	-0.881752	0.0180217	3.80284	2.62352	5.48451	LO_EC
chr17	13897197	13897597	Peak15820	-1.34965	0.00051579	3.99116	6.00609	5.80126	LO_EC
chr17	14830564	14830964	Peak15828	-0.815286	0.0154297	4.07479	6.09615	5.4115	LO_EC
chr17	15377597	15377997	Peak15836	-0.680076	0.0249434	4.9896	6.22203	6.01908	LO_EC
chr17	15776044	15776444	Peak15851	-1.86377	5.77119e-05	3.40464	5.41643	5.74875	LO_EC
chr17	17155018	17155418	Peak15868	-1.77264	5.14308e-05	3.64565	5.58125	5.8415	LO_EC
chr17	17333016	17333416	Peak15870	-1.03827	0.00130907	5.15411	3.68672	6.5842	LO_EC
chr17	17720839	17721239	Peak15886	-0.90103	0.0192456	3.03328	4.17044	4.86288	LO_EC
chr17	18279877	18280277	Peak15898	-1.41975	0.0039113	1.75404	4.59626	4.55325	LO_EC
chr17	18655506	18655906	Peak15900	-1.21938	0.00047432	4.53017	5.61042	6.14578	LO_EC
chr17	23764807	23765207	Peak15958	-1.01771	0.00601454	3.94457	4.77039	5.57834	LO_EC
chr17	23877229	23877629	Peak15967	-0.705198	0.0207377	4.89941	6.2215	5.96877	LO_EC
chr17	24210289	24210689	Peak15984	-0.728066	0.0153007	5.03207	6.41709	6.10339	LO_EC
chr17	24278430	24278830	Peak15986	-0.603374	0.021457	5.88781	7.02442	6.68186	LO_EC
chr17	24346158	24346558	Peak15992	-0.746259	0.0119933	5.03207	6.31727	6.11659	LO_EC
chr17	24488681	24489081	Peak15995	-0.638624	0.0221763	5.50002	6.88103	6.38396	LO_EC
chr17	24592017	24592417	Peak15999	-0.829807	0.00171457	5.77683	7.03626	6.86034	LO_EC
chr17	24625516	24625916	Peak16003	-0.895623	0.012069	3.85347	5.25033	5.36754	LO_EC
chr17	24856703	24857103	Peak16019	-1.04849	8.93451e-05	5.68697	6.85552	6.98282	LO_EC
chr17	25380175	25380575	Peak16043	-2.3133	1.62518e-05	2.52501	5.65648	5.49457	LO_EC
chr17	25410736	25411136	Peak16045	-0.630885	0.0237196	5.46944	7.05263	6.34911	LO_EC
chr17	25707564	25707964	Peak16059	-0.979964	0.00140459	4.77611	6.96046	6.10927	LO_EC
chr17	26030911	26031311	Peak16080	-0.742164	0.034449	3.58865	4.89873	5.03379	LO_EC
chr17	26717816	26718216	Peak16105	-1.87803	0.000621653	2.11856	4.43337	5.01908	LO_EC
chr17	26721396	26721796	Peak16106	-0.647926	0.0311366	5.24808	5.10749	6.22355	LO_EC
chr17	27021872	27022272	Peak16116	-0.936094	0.0181196	2.53017	4.97305	4.53269	LO_EC
chr17	27224369	27224769	Peak16133	-0.691976	0.0452685	3.64961	5.65547	5.00738	LO_EC
chr17	27341237	27341637	Peak16140	-0.605352	0.0484065	4.92233	6.14936	5.86161	LO_EC
chr17	27377791	27378191	Peak16143	-1.25149	0.000748982	4.40183	4.84868	6.11553	LO_EC
chr17	27461974	27462374	Peak16144	-2.15116	2.26883e-10	4.37123	7.49698	6.72098	LO_EC
chr17	27671692	27672092	Peak16151	-0.705635	0.0318973	4.43362	5.45091	5.63636	LO_EC
chr17	27766216	27766616	Peak16158	-0.898343	0.0216021	2.64486	4.97287	4.64005	LO_EC
chr17	27844976	27845376	Peak16164	-0.804221	0.00628824	5.03085	6.74876	6.17195	LO_EC
chr17	27957563	27957963	Peak16171	-0.664301	0.0140475	5.73916	6.6998	6.64098	LO_EC
chr17	28077286	28077686	Peak16179	-0.786402	0.025315	3.85279	4.36352	5.30248	LO_EC
chr17	28224333	28224733	Peak16192	-0.736259	0.0358026	3.52845	5.12862	4.96995	LO_EC
chr17	28995154	28995554	Peak16237	-2.71051	1.78381e-06	2.27125	5.19114	5.76697	LO_EC
chr17	29032161	29032561	Peak16240	-0.970828	0.00173084	5.15299	6.23167	6.49742	LO_EC
chr17	29121636	29122036	Peak16250	-0.801567	0.0261283	3.46653	4.87431	5.0222	LO_EC
chr17	29144802	29145202	Peak16252	-0.669691	0.00399844	6.43775	7.36797	7.26702	LO_EC
chr17	29169293	29169693	Peak16254	-0.780271	0.00206885	5.85176	7.05836	6.85159	LO_EC
chr17	29463592	29463992	Peak16277	-0.687253	0.0410313	4.11685	5.10749	5.3682	LO_EC
chr17	29884416	29884816	Peak16303	-1.79113	0.00108756	1.74814	5.17092	4.75099	LO_EC
chr17	30007250	30007650	Peak16312	-0.952399	0.00710737	4.03267	5.45065	5.55226	LO_EC
chr17	30017160	30017560	Peak16313	-0.882772	0.00271327	5.33605	5.30804	6.55168	LO_EC
chr17	31547021	31547421	Peak16355	-0.746716	0.0337078	3.7533	4.21002	5.20792	LO_EC
chr17	31945081	31945481	Peak16375	-0.73489	0.0039113	6.06363	6.82965	7.01716	LO_EC
chr17	31956275	31956675	Peak16377	-0.6856	0.0345387	4.5576	5.12878	5.70915	LO_EC
chr17	32035921	32036321	Peak16381	-1.73906	0.000204166	3.47011	4.49899	5.76833	LO_EC
chr17	32066930	32067330	Peak16382	-0.772872	0.0309801	3.27125	5.76966	4.81621	LO_EC
chr17	32421473	32421873	Peak16398	-0.763498	0.0118433	4.96742	6.21155	6.08898	LO_EC
chr17	32487433	32487833	Peak16402	-0.792393	0.00332165	5.57467	6.67095	6.62567	LO_EC
chr17	34046070	34046470	Peak16463	-0.659743	0.00155903	6.73353	8.02425	7.51169	LO_EC
chr17	34052752	34053152	Peak16464	-0.819252	0.000732331	6.06259	7.58448	7.08701	LO_EC
chr17	34092504	34092904	Peak16470	-0.893683	0.00254394	5.05329	6.39035	6.2851	LO_EC
chr17	34256185	34256585	Peak16486	-0.68733	0.00256106	6.34591	7.59588	7.18658	LO_EC
chr17	34257783	34258183	Peak16487	-0.647161	0.0229313	5.30377	6.89314	6.21848	LO_EC
chr17	34477581	34477981	Peak16498	-1.10267	0.00324169	4.03328	4.59603	5.71547	LO_EC
chr17	34535529	34535929	Peak16500	-0.808322	0.0122593	4.49739	6.31826	5.75713	LO_EC
chr17	34740740	34741140	Peak16506	-0.814264	4.20084e-05	6.8699	7.92719	7.81449	LO_EC
chr17	34783837	34784237	Peak16512	-0.870743	0.000822705	5.65877	7.04722	6.77247	LO_EC
chr17	34973726	34974126	Peak16514	-0.645713	0.0336244	5.03388	5.96041	6.0171	LO_EC
chr17	35035295	35035695	Peak16517	-0.715623	0.0342637	3.89974	5.69893	5.1949	LO_EC
chr17	35109199	35109599	Peak16527	-0.684591	0.0456144	3.94907	5.36394	5.26295	LO_EC
chr17	35183612	35184012	Peak16533	-0.805239	0.00114456	5.95652	7.27983	6.9742	LO_EC
chr17	35195879	35196279	Peak16536	-0.631277	0.0208113	5.60454	7.22161	6.46744	LO_EC
chr17	35258159	35258559	Peak16540	-0.714493	0.00295899	6.18327	7.41256	7.08028	LO_EC
chr17	35378441	35378841	Peak16548	-0.68389	0.0131437	5.57405	6.56506	6.51517	LO_EC
chr17	35775697	35776097	Peak16577	-0.807067	0.0262007	3.4037	4.62651	4.98836	LO_EC
chr17	35840862	35841262	Peak16582	-0.677574	0.0403369	3.89774	6.58842	5.08978	LO_EC
chr17	35973841	35974241	Peak16588	-0.814985	0.00238702	5.75312	6.70603	6.82891	LO_EC
chr17	36002839	36003239	Peak16593	-1.00775	0.00103024	4.85038	6.66346	6.20929	LO_EC
chr17	36053536	36053936	Peak16600	-0.864038	0.000356573	6.04302	7.3219	7.11406	LO_EC
chr17	43848954	43849354	Peak16684	-0.687063	0.049416	3.69819	3.74218	5.11473	LO_EC
chr17	45570458	45570858	Peak16703	-0.939155	9.6168e-05	6.07376	7.01293	7.2173	LO_EC
chr17	45700650	45701050	Peak16716	-0.689919	0.00767959	5.81513	7.03561	6.71784	LO_EC
chr17	45736404	45736804	Peak16721	-1.00971	0.00641732	3.98429	5.46758	5.61641	LO_EC
chr17	45744004	45744404	Peak16723	-0.914296	0.00427046	4.72563	5.65648	6.05598	LO_EC
chr17	45803146	45803546	Peak16731	-1.12842	0.00275014	4.07773	5.34587	5.76546	LO_EC
chr17	46023476	46023876	Peak16741	-1.23495	0.00127714	3.98679	5.45065	5.73689	LO_EC
chr17	46520284	46520684	Peak16759	-0.745509	0.00290036	5.89907	7.20127	6.85334	LO_EC
chr17	46689725	46690125	Peak16769	-0.614406	0.0335863	5.45334	6.39914	6.34447	LO_EC
chr17	46782922	46783322	Peak16773	-1.11326	0.000304773	5.15494	6.61964	6.59549	LO_EC
chr17	46817760	46818160	Peak16777	-0.963188	2.02987e-05	6.23101	7.62594	7.36971	LO_EC
chr17	46949433	46949833	Peak16787	-0.622225	0.0209159	6.01053	5.91239	6.84983	LO_EC
chr17	46983544	46983944	Peak16788	-1.55202	0.000655651	3.2692	5.06445	5.44615	LO_EC
chr17	47027251	47027651	Peak16791	-0.93235	0.00100292	5.24886	6.97269	6.47823	LO_EC
chr17	47311693	47312093	Peak16798	-0.829509	0.019093	3.80355	4.92349	5.2825	LO_EC
chr17	47459152	47459552	Peak16801	-1.47062	0.0019982	2.74814	4.65704	5.10673	LO_EC
chr17	47800305	47800705	Peak16825	-0.892303	0.0210548	2.94521	3.84946	4.83667	LO_EC
chr17	47831735	47832135	Peak16828	-0.600872	0.0131639	6.26817	7.51323	7.02511	LO_EC
chr17	47874993	47875393	Peak16831	-0.659287	0.0187829	5.74999	7.00192	6.67501	LO_EC
chr17	48035259	48035659	Peak16845	-2.74355	2.26883e-10	3.1926	7.24617	6.3133	LO_EC
chr17	48095045	48095445	Peak16851	-0.681628	0.0424199	4.11685	5.38001	5.35341	LO_EC
chr17	48112961	48113361	Peak16853	-0.636658	0.0302196	5.28264	6.42492	6.21848	LO_EC
chr17	48176397	48176797	Peak16859	-0.75295	0.0382975	2.85416	5.39954	4.5295	LO_EC
chr17	48632883	48633283	Peak16872	-0.976242	0.0139311	2.94907	4.82178	4.85939	LO_EC
chr17	48644387	48644787	Peak16873	-0.703616	0.0482853	3.19368	4.39954	4.75201	LO_EC
chr17	49099718	49100118	Peak16885	-0.910786	0.0193521	2.85004	4.92555	4.76324	LO_EC
chr17	50164440	50164840	Peak16902	-0.797397	0.0172961	4.55845	3.56416	5.88191	LO_EC
chr17	51978809	51979209	Peak16929	-0.813036	0.0279972	3.11399	4.82438	4.82599	LO_EC
chr17	53618143	53618543	Peak16941	-0.750812	0.000177755	6.86416	7.8713	7.73654	LO_EC
chr17	5402629	5403029	Peak16952	-0.673691	0.0374615	4.49826	5.92378	5.6395	LO_EC
chr17	55179438	55179838	Peak16965	-0.762824	0.0256825	4.37411	3.43443	5.72648	LO_EC
chr17	56091437	56091837	Peak16975	-0.691178	0.0302192	4.56055	5.68529	5.68087	LO_EC
chr17	56301669	56302069	Peak16997	-0.618806	0.0279221	5.69781	6.47636	6.56507	LO_EC
chr17	56358197	56358597	Peak17001	-0.931762	0.00100871	5.34022	7.07449	6.56857	LO_EC
chr17	56395427	56395827	Peak17006	-0.704862	0.00542206	5.91025	7.09111	6.81883	LO_EC
chr17	56430534	56430934	Peak17010	-0.687491	0.00298605	6.34578	7.37241	7.19402	LO_EC
chr17	56680053	56680453	Peak17023	-0.990073	0.00421062	4.26971	6.1079	5.75287	LO_EC
chr17	56724102	56724502	Peak17027	-0.784107	0.00070779	6.3453	7.43413	7.30761	LO_EC
chr17	56890823	56891223	Peak17038	-0.734807	0.00896854	5.54608	5.88686	6.56215	LO_EC
chr17	56896847	56897247	Peak17039	-0.889393	0.00197715	5.23088	6.57291	6.43511	LO_EC
chr17	56949626	56950026	Peak17042	-0.678707	0.0402378	4.26611	5.30889	5.4571	LO_EC
chr17	57358522	57358922	Peak17068	-0.704768	0.0470666	3.33802	4.43469	4.85684	LO_EC
chr17	5841157	5841557	Peak17083	-0.983233	0.0017697	4.8039	6.40727	6.16028	LO_EC
chr17	59072022	59072422	Peak17089	-0.637572	0.0284763	5.61784	6.16173	6.54113	LO_EC
chr17	5977942	5978342	Peak17094	-0.847338	0.00511689	5.21347	5.14992	6.42485	LO_EC
chr17	6106407	6106807	Peak17097	-0.630194	0.0418152	4.82803	6.22081	5.82469	LO_EC
chr17	6317284	6317684	Peak17102	-0.668107	0.0265715	5.15661	5.99596	6.15783	LO_EC
chr17	65112005	65112405	Peak17137	-0.772712	0.0282221	3.99054	3.2094	5.44784	LO_EC
chr17	65222904	65223304	Peak17139	-0.874462	0.000139414	6.28404	7.1287	7.33959	LO_EC
chr17	66051511	66051911	Peak17148	-0.854773	0.00290212	5.55992	5.12992	6.72596	LO_EC
chr17	66121790	66122190	Peak17153	-0.64769	0.0482692	4.23088	5.72766	5.36082	LO_EC
chr17	66222041	66222441	Peak17158	-0.802294	0.0146313	4.4037	5.46771	5.69071	LO_EC
chr17	66305509	66305909	Peak17165	-2.08717	1.78381e-06	3.69742	5.54881	6.13899	LO_EC
chr17	66472823	66473223	Peak17171	-0.645472	0.042276	4.64565	5.99587	5.69553	LO_EC
chr17	68197077	68197477	Peak17200	-0.836389	0.0247044	3.33704	3.43443	5.04917	LO_EC
chr17	6941302	6941702	Peak17207	-1.23322	0.000821968	4.15438	5.59591	5.84455	LO_EC
chr17	6948775	6949175	Peak17209	-1.14789	0.00540012	3.26817	4.79559	5.20169	LO_EC
chr17	69732090	69732490	Peak17215	-0.697964	0.00601454	5.95684	6.96023	6.86097	LO_EC
chr17	71096972	71097372	Peak17236	-0.74251	0.00720038	5.30226	7.31298	6.30947	LO_EC
chr17	72131793	72132193	Peak17270	-0.670328	0.0297325	4.87645	5.87402	5.92121	LO_EC
chr17	72906375	72906775	Peak17274	-0.79522	0.0311366	3.19476	3.79478	4.909	LO_EC
chr17	73612595	73612995	Peak17281	-0.682956	0.0423074	4.26817	4.5015	5.50679	LO_EC
chr17	7451579	7451979	Peak17298	-1.60647	8.93451e-05	4.07361	4.71472	6.08531	LO_EC
chr17	79284994	79285394	Peak17339	-0.794277	0.0242859	3.89841	4.16981	5.36082	LO_EC
chr17	81208638	81209038	Peak17402	-0.868914	0.0136445	4.07479	4.71364	5.55872	LO_EC
chr17	81225426	81225826	Peak17403	-0.933557	0.0172961	3.03328	3.29012	4.94474	LO_EC
chr17	84273927	84274327	Peak17462	-1.00742	0.00364203	4.33409	5.78325	5.8415	LO_EC
chr17	84891765	84892165	Peak17484	-0.716626	0.045076	3.11284	4.79682	4.68482	LO_EC
chr17	84945811	84946211	Peak17487	-0.720888	0.0470666	2.85827	3.94821	4.63895	LO_EC
chr17	85740589	85740989	Peak17512	-2.06711	2.79008e-05	3.03207	5.67162	5.62315	LO_EC
chr17	87362294	87362694	Peak17554	-0.622444	0.0202223	5.71311	7.01258	6.54981	LO_EC
chr17	87506507	87506907	Peak17560	-0.751358	0.00271327	5.89874	7.25092	6.86097	LO_EC
chr17	87826730	87827130	Peak17571	-0.890798	0.0182834	3.33212	4.74197	5.0666	LO_EC
chr17	87894370	87894770	Peak17576	-1.58043	0.00151076	2.5336	4.62536	5.03688	LO_EC
chr17	88063546	88063946	Peak17586	-0.63102	0.0352363	5.26559	5.45065	6.21439	LO_EC
chr17	88868031	88868431	Peak17621	-1.28624	7.42455e-05	5.0951	4.43337	6.68383	LO_EC
chr17	88897524	88897924	Peak17622	-1.19405	0.00323884	3.5903	4.5644	5.45878	LO_EC
chr17	89163448	89163848	Peak17636	-0.768969	0.0307658	3.58948	5.21308	5.09492	LO_EC
chr17	91673710	91674110	Peak17660	-0.613376	0.0274958	5.88697	5.91277	6.73904	LO_EC
chr18	11239782	11240182	Peak17702	-0.768426	0.0345516	3.11628	4.50125	4.76223	LO_EC
chr18	12374727	12375127	Peak17720	-0.738276	0.0372729	3.47011	4.99552	4.97082	LO_EC
chr18	12476128	12476528	Peak17724	-1.37215	0.00332165	2.52501	5.01764	4.88612	LO_EC
chr18	12544176	12544576	Peak17727	-1.13817	0.00134328	4.5306	3.99569	6.12783	LO_EC
chr18	12951540	12951940	Peak17737	-0.676016	0.044026	4.07538	5.14992	5.30761	LO_EC
chr18	14130943	14131343	Peak17749	-0.697374	0.0210002	4.98898	6.40841	6.03069	LO_EC
chr18	17577348	17577748	Peak17769	-0.956558	0.00453589	4.56139	5.61205	5.99991	LO_EC
chr18	19221927	19222327	Peak17775	-0.661107	0.0279204	5.35351	5.19177	6.3516	LO_EC
chr18	20890755	20891155	Peak17786	-0.76638	0.0296745	3.8007	5.1512	5.25888	LO_EC
chr18	20899387	20899787	Peak17787	-1.00705	0.00422573	4.07243	5.92434	5.603	LO_EC
chr18	21225082	21225482	Peak17801	-0.911151	0.0155426	3.4728	4.56488	5.17336	LO_EC
chr18	21593343	21593743	Peak17809	-1.18009	0.00295899	3.64406	4.89949	5.46629	LO_EC
chr18	23673957	23674357	Peak17821	-0.891592	0.0211897	2.85279	4.65772	4.74068	LO_EC
chr18	24178835	24179235	Peak17828	-0.640853	0.0204593	5.57384	7.06997	6.45479	LO_EC
chr18	24364172	24364572	Peak17833	-0.755332	0.0155151	4.96583	6.15879	6.12203	LO_EC
chr18	24552688	24553088	Peak17839	-0.681452	0.043766	4.03449	5.19068	5.28699	LO_EC
chr18	24688461	24688861	Peak17845	-0.658859	0.0103406	6.06422	6.66312	6.92599	LO_EC
chr18	24867818	24868218	Peak17854	-1.04369	0.00245503	4.19476	6.29874	5.7058	LO_EC
chr18	30668945	30669345	Peak17886	-0.670832	0.0397234	4.26611	6.19146	5.40434	LO_EC
chr18	3359891	3360291	Peak17922	-0.861287	0.022091	3.33998	3.5656	5.07182	LO_EC
chr18	33623501	33623901	Peak17923	-0.609998	0.0260899	5.65995	6.906	6.49569	LO_EC
chr18	33995607	33996007	Peak17928	-0.974813	0.00189609	5.0739	4.62697	6.42925	LO_EC
chr18	34050145	34050545	Peak17930	-0.932403	0.00208033	5.07596	6.01886	6.36205	LO_EC
chr18	34342720	34343120	Peak17942	-0.997219	0.0125614	2.85004	4.99534	4.78078	LO_EC
chr18	34911085	34911485	Peak17967	-0.880323	0.00133119	5.55887	7.04714	6.72028	LO_EC
chr18	3507634	3508034	Peak17981	-0.76667	0.00131528	6.1356	7.50517	7.08491	LO_EC
chr18	35091535	35091935	Peak17982	-0.691123	0.00171457	6.83778	7.73827	7.67163	LO_EC
chr18	3593535	3593935	Peak18014	-0.938105	0.0158877	3.19259	3.36325	5.03996	LO_EC
chr18	35989210	35989610	Peak18018	-0.7554	0.0125614	4.89808	6.64862	6.02107	LO_EC
chr18	36177777	36178177	Peak18037	-0.624589	0.0389325	4.98992	6.26999	5.94354	LO_EC
chr18	36281844	36282244	Peak18039	-0.642749	0.0448535	4.50046	5.84917	5.56828	LO_EC
chr18	37803677	37804077	Peak18085	-0.829624	0.00900655	4.67138	5.86165	5.92743	LO_EC
chr18	37927724	37928124	Peak18104	-1.49625	0.000130854	4.11399	5.41656	6.00853	LO_EC
chr18	38761085	38761485	Peak18155	-0.783445	0.00072627	6.28455	7.23145	7.24436	LO_EC
chr18	39063498	39063898	Peak18163	-1.57673	2.6873e-05	4.33802	5.796	6.22859	LO_EC
chr18	39067021	39067421	Peak18164	-1.37165	0.000326226	4.40745	5.08672	6.20829	LO_EC
chr18	39082705	39083105	Peak18165	-1.35148	0.000561868	4.03328	5.01834	5.85812	LO_EC
chr18	39088745	39089145	Peak18166	-0.87196	0.0225854	2.85141	4.62605	4.68482	LO_EC
chr18	39227480	39227880	Peak18173	-0.6728	0.0369006	4.69819	5.34545	5.81475	LO_EC
chr18	39614557	39614957	Peak18179	-0.991621	0.0163316	1.94521	4.21094	4.35408	LO_EC
chr18	42110699	42111099	Peak18186	-0.696686	0.0132454	5.51561	6.62628	6.4918	LO_EC
chr18	4581686	4582086	Peak18232	-0.776438	0.0336617	3.26301	3.74176	4.94145	LO_EC
chr18	46757135	46757535	Peak18245	-0.614335	0.0296745	5.64525	6.44315	6.51184	LO_EC
chr18	46901202	46901602	Peak18251	-0.85108	0.00210718	5.52931	6.3364	6.66406	LO_EC
chr18	47081291	47081691	Peak18256	-0.990658	0.012855	3.19693	3.74303	5.1126	LO_EC
chr18	5011595	5011995	Peak18277	-0.92786	0.00123022	5.42036	5.72734	6.65431	LO_EC
chr18	5423352	5423752	Peak18313	-1.06322	0.00554295	3.7555	4.68518	5.48164	LO_EC
chr18	5425992	5426392	Peak18314	-1.94522	0.000122138	2.94778	4.76893	5.52069	LO_EC
chr18	5427745	5428145	Peak18315	-1.38075	0.00248826	2.74814	5.39874	4.96995	LO_EC
chr18	54878694	54879094	Peak18318	-0.782289	0.0128611	4.94521	4.4339	6.1386	LO_EC
chr18	5591733	5592133	Peak18330	-1.03998	0.00457474	3.89774	5.36325	5.51789	LO_EC
chr18	58037787	58038187	Peak18361	-0.892201	0.00307127	4.9896	6.23114	6.23362	LO_EC
chr18	58369590	58369990	Peak18365	-0.694953	0.0430763	3.74814	5.59556	5.08382	LO_EC
chr18	60811463	60811863	Peak18383	-0.685189	0.0432972	3.69895	6.04166	4.9764	LO_EC
chr18	60820896	60821296	Peak18384	-0.66209	0.0459097	4.26868	5.08555	5.44615	LO_EC
chr18	60907749	60908149	Peak18392	-0.890373	0.0130105	3.85073	5.08521	5.37666	LO_EC
chr18	6135921	6136321	Peak18411	-0.697547	0.00249794	6.36288	7.44638	7.22256	LO_EC
chr18	61769335	61769735	Peak18426	-0.861017	0.0164491	3.75404	4.92462	5.2851	LO_EC
chr18	61787773	61788173	Peak18428	-0.653251	0.00842287	6.19205	6.8994	7.0249	LO_EC
chr18	61794387	61794787	Peak18429	-0.640339	0.0380647	4.94553	5.75635	5.94638	LO_EC
chr18	61826034	61826434	Peak18431	-0.737301	0.0227353	4.46788	5.82238	5.65952	LO_EC
chr18	64023873	64024273	Peak18465	-0.826883	0.00561231	4.96837	6.39894	6.14291	LO_EC
chr18	64334750	64335150	Peak18468	-0.739396	0.0399392	3.40838	3.94895	5.01367	LO_EC
chr18	6489895	6490295	Peak18481	-0.633043	0.0225582	5.65877	6.82303	6.53874	LO_EC
chr18	65047180	65047580	Peak18483	-0.677653	0.0118642	5.64446	7.06942	6.55354	LO_EC
chr18	65680226	65680626	Peak18502	-1.11489	0.000338978	5.01237	6.67897	6.45363	LO_EC
chr18	65746796	65747196	Peak18505	-0.962046	0.000859118	5.21373	6.69245	6.4802	LO_EC
chr18	65775854	65776254	Peak18509	-0.661117	0.0474127	4.36932	4.53354	5.55756	LO_EC
chr18	66608468	66608868	Peak18536	-1.56749	0.00123125	2.94263	3.50125	5.32725	LO_EC
chr18	67467806	67468206	Peak18558	-1.14054	0.00740254	2.85416	4.59438	4.95458	LO_EC
chr18	67770407	67770807	Peak18574	-0.735935	0.00740254	5.4681	7.1289	6.47315	LO_EC
chr18	69102608	69103008	Peak18600	-0.841274	0.0133406	4.40464	5.04304	5.78764	LO_EC
chr18	69506009	69506409	Peak18605	-1.33915	0.0004931	4.07302	5.7131	5.86288	LO_EC
chr18	69941747	69942147	Peak18618	-0.745761	0.0146946	4.98867	5.76986	6.1082	LO_EC
chr18	69955638	69956038	Peak18619	-0.69286	0.0191656	5.23167	6.27102	6.24569	LO_EC
chr18	70727720	70728120	Peak18634	-0.803808	0.00148623	5.92134	7.19138	6.94205	LO_EC
chr18	73825026	73825426	Peak18647	-0.777247	0.0367298	2.4037	4.62743	4.34777	LO_EC
chr18	74122940	74123340	Peak18654	-1.00099	0.00254394	4.53103	6.01939	5.96509	LO_EC
chr18	74498136	74498536	Peak18661	-1.50649	0.00148641	2.94778	4.32658	5.26031	LO_EC
chr18	74507597	74507997	Peak18662	-1.11092	0.00998224	2.26508	4.65704	4.56614	LO_EC
chr18	74938409	74938809	Peak18671	-0.751669	0.00071753	6.43775	7.6636	7.34521	LO_EC
chr18	75520535	75520935	Peak18690	-0.67727	0.0156272	5.45289	6.62657	6.39724	LO_EC
chr18	75594097	75594497	Peak18696	-0.834298	0.0247044	3.03812	5.76934	4.71776	LO_EC
chr18	76006189	76006589	Peak18717	-1.6962	0.000204166	3.40558	4.89949	5.63284	LO_EC
chr18	76142311	76142711	Peak18722	-0.73015	0.0333805	3.80355	5.46694	5.15718	LO_EC
chr18	76331231	76331631	Peak18730	-0.857946	0.0145886	4.03146	4.97305	5.5013	LO_EC
chr18	76345420	76345820	Peak18731	-0.813179	0.0164987	4.19422	5.14944	5.55168	LO_EC
chr18	76534313	76534713	Peak18735	-0.780252	0.030964	3.26611	4.97287	4.86034	LO_EC
chr18	76538370	76538770	Peak18736	-0.707805	0.0338943	4.15438	5.61205	5.40563	LO_EC
chr18	76794918	76795318	Peak18741	-0.639034	0.0462293	4.58742	5.78335	5.64799	LO_EC
chr18	77803902	77804302	Peak18770	-0.873027	0.0107951	4.23246	5.65547	5.64908	LO_EC
chr18	80201728	80202128	Peak18808	-0.948809	0.0145106	3.03328	4.99605	4.84983	LO_EC
chr18	80631253	80631653	Peak18825	-2.17475	0.000316886	1.53017	3.84828	5.09115	LO_EC
chr18	81183319	81183719	Peak18835	-0.714094	0.0242106	4.75256	5.56464	5.88098	LO_EC
chr18	81448621	81449021	Peak18840	-0.903698	0.00171457	5.57259	5.72691	6.79039	LO_EC
chr18	82913777	82914177	Peak18866	-0.827432	0.0276611	2.94521	4.25182	4.76324	LO_EC
chr18	82929077	82929477	Peak18868	-1.08282	0.00264584	4.07361	5.61088	5.6715	LO_EC
chr18	82946901	82947301	Peak18870	-0.711175	0.00179885	6.50046	7.24118	7.37093	LO_EC
chr18	83037319	83037719	Peak18876	-1.35656	0.00389416	2.40745	4.5333	4.84374	LO_EC
chr18	83065708	83066108	Peak18879	-0.889505	0.0221878	2.75109	4.28983	4.71599	LO_EC
chr18	83071586	83071986	Peak18880	-1.33597	0.00162973	3.1926	6.13988	5.17616	LO_EC
chr18	83082418	83082818	Peak18882	-0.921731	0.00841342	3.98992	5.69937	5.46568	LO_EC
chr18	85020483	85020883	Peak18914	-0.634627	0.0116522	6.08483	6.97201	6.90231	LO_EC
chr18	9428697	9429097	Peak18940	-0.906548	0.020467	2.64802	4.71277	4.603	LO_EC
chr18	9494945	9495345	Peak18942	-0.768033	0.0381631	2.52845	4.13008	4.44615	LO_EC
chr19	10297108	10297508	Peak18959	-0.793174	0.0173379	4.23035	5.501	5.53925	LO_EC
chr19	10379273	10379673	Peak18966	-0.738005	0.0381088	3.2692	5.48471	4.79545	LO_EC
chr19	11023619	11024019	Peak18995	-0.622845	0.0419374	4.9896	6.0193	5.95086	LO_EC
chr19	11986639	11987039	Peak19005	-0.601094	0.0269664	5.73879	6.73505	6.55599	LO_EC
chr19	12086246	12086646	Peak19011	-0.65252	0.0243679	5.4366	6.72158	6.38252	LO_EC
chr19	14745186	14745586	Peak19025	-1.3648	0.00118633	3.53103	5.107	5.49232	LO_EC
chr19	16207050	16207450	Peak19038	-0.896872	0.00443203	4.58824	6.50914	5.89001	LO_EC
chr19	17212610	17213010	Peak19048	-1.03352	0.0034114	4.15494	5.6714	5.69996	LO_EC
chr19	21858897	21859297	Peak19073	-1.12907	0.000124525	5.01053	7.09111	6.42336	LO_EC
chr19	21892526	21892926	Peak19075	-1.00073	0.00613186	4.03267	4.97197	5.63747	LO_EC
chr19	23150241	23150641	Peak19088	-0.875392	0.00215641	5.2486	6.62668	6.42775	LO_EC
chr19	24284003	24284403	Peak19117	-1.0744	0.00849531	2.94521	5.01851	4.88955	LO_EC
chr19	29175577	29175977	Peak19180	-0.667879	0.00358311	6.4138	7.59597	7.2335	LO_EC
chr19	29325971	29326371	Peak19182	-1.29951	6.20564e-05	4.72638	6.72787	6.32058	LO_EC
chr19	29596482	29596882	Peak19191	-0.856613	0.00171457	5.43821	6.9662	6.56857	LO_EC
chr19	29779029	29779429	Peak19197	-1.12897	0.00838262	2.64486	4.43416	4.81261	LO_EC
chr19	29880725	29881125	Peak19198	-0.858482	0.0021536	5.3363	6.79651	6.48699	LO_EC
chr19	32722492	32722892	Peak19236	-1.3457	0.00457474	1.74223	4.56464	5.37422	LO_EC
chr19	34821638	34822038	Peak19265	-1.2353	0.0059344	2.40183	4.76893	4.71109	LO_EC
chr19	36131702	36132102	Peak19273	-1.15243	0.00238822	3.85141	5.565	5.55756	LO_EC
chr19	36423013	36423413	Peak19276	-0.82666	0.0230306	3.47011	5.04063	5.05528	LO_EC
chr19	36790710	36791110	Peak19283	-0.883767	0.0228713	2.75844	4.56344	4.71109	LO_EC
chr19	36908506	36908906	Peak19288	-0.73111	0.011	5.37339	6.72007	6.40651	LO_EC
chr19	37326555	37326955	Peak19304	-0.678533	0.0497489	3.702	4.76934	5.0514	LO_EC
chr19	38099848	38100248	Peak19325	-1.14254	0.00537584	3.53446	4.39739	5.46003	LO_EC
chr19	38506002	38506402	Peak19344	-0.863749	0.0262458	1.95035	4.68363	4.21266	LO_EC
chr19	3851503	3851903	Peak19345	-0.929612	0.000219956	5.68639	7.54553	6.83861	LO_EC
chr19	38555281	38555681	Peak19346	-1.01695	0.00310432	4.3005	6.11769	5.79397	LO_EC
chr19	38562544	38562944	Peak19348	-0.862775	0.0230965	3.02964	4.74324	4.83312	LO_EC
chr19	40315260	40315660	Peak19370	-0.721081	0.039181	3.69589	4.87392	5.12057	LO_EC
chr19	40347022	40347422	Peak19373	-1.48634	0.000208507	4.07184	4.99534	5.99314	LO_EC
chr19	4042121	4042521	Peak19378	-0.886674	0.0125566	3.9465	5.4151	5.4531	LO_EC
chr19	41529578	41529978	Peak19412	-1.03964	0.00456329	3.94585	5.36408	5.56186	LO_EC
chr19	41790666	41791066	Peak19421	-0.7142	0.0482692	2.64961	4.92331	4.38219	LO_EC
chr19	42203494	42203894	Peak19446	-0.643232	0.00295899	6.90976	7.4801	7.68288	LO_EC
chr19	42221658	42222058	Peak19449	-0.689596	0.0437349	3.94199	5.43469	5.24631	LO_EC
chr19	42506064	42506464	Peak19467	-0.896698	0.000473867	5.73898	7.01838	6.86919	LO_EC
chr19	4306204	4306604	Peak19485	-0.888022	0.00647713	4.5306	5.78222	5.86636	LO_EC
chr19	43546833	43547233	Peak19490	-0.960267	0.00813482	3.94585	5.01869	5.5251	LO_EC
chr19	43690890	43691290	Peak19499	-0.751783	0.0173105	4.80319	5.43456	5.9764	LO_EC
chr19	45224982	45225382	Peak19589	-0.685222	0.0397142	4.11456	5.51761	5.32909	LO_EC
chr19	45375520	45375920	Peak19603	-0.733633	0.0354643	3.84866	4.5015	5.2675	LO_EC
chr19	47089437	47089837	Peak19685	-0.725202	0.0134314	5.1332	6.78335	6.17681	LO_EC
chr19	47092269	47092669	Peak19686	-0.716916	0.0119303	5.43706	6.07419	6.44498	LO_EC
chr19	47294045	47294445	Peak19703	-0.712182	0.0406345	3.94263	3.8471	5.34164	LO_EC
chr19	47453586	47453986	Peak19717	-0.866279	0.00540012	5.03388	5.80814	6.29382	LO_EC
chr19	47538830	47539230	Peak19721	-0.604853	0.0457221	5.03085	6.41629	5.94922	LO_EC
chr19	4756253	4756653	Peak19722	-0.761067	0.00100308	6.32075	7.23576	7.25332	LO_EC
chr19	47567679	47568079	Peak19724	-1.17478	0.000826742	4.49958	5.43469	6.10231	LO_EC
chr19	47770899	47771299	Peak19730	-0.85426	0.0184872	3.64882	4.99587	5.21885	LO_EC
chr19	4896748	4897148	Peak19759	-0.946917	0.000822705	5.46855	6.04149	6.71258	LO_EC
chr19	5038574	5038974	Peak19772	-0.732975	0.0173365	4.80355	6.44295	5.92121	LO_EC
chr19	5118027	5118427	Peak19784	-1.16739	4.83003e-05	5.3015	6.95474	6.72813	LO_EC
chr19	53166733	53167133	Peak19805	-1.15951	0.000998649	4.37123	5.98487	5.96833	LO_EC
chr19	53465055	53465455	Peak19817	-0.965186	1.97482e-05	6.38827	7.434	7.5307	LO_EC
chr19	53816430	53816830	Peak19834	-0.95768	0.0170736	2.74962	3.99783	4.81883	LO_EC
chr19	53899423	53899823	Peak19839	-0.775207	0.0321763	3.40183	4.21186	5.00423	LO_EC
chr19	55218114	55218514	Peak19862	-0.746073	0.0275525	4.03085	5.77018	5.3516	LO_EC
chr19	56740513	56740913	Peak19904	-1.76694	3.17105e-05	3.9465	4.74197	6.09344	LO_EC
chr19	5731589	5731989	Peak19927	-0.800582	0.0171535	4.2314	5.93507	5.55325	LO_EC
chr19	57435114	57435514	Peak19930	-0.747236	0.00575461	5.57529	6.78243	6.57651	LO_EC
chr19	57492667	57493067	Peak19933	-1.05116	0.00437563	4.03146	5.56632	5.65952	LO_EC
chr19	58470300	58470700	Peak19960	-1.48326	0.00338945	1.5336	3.43443	4.63895	LO_EC
chr19	58511929	58512329	Peak19963	-0.771296	0.0339024	3.26714	4.53477	4.91999	LO_EC
chr19	59664022	59664422	Peak19994	-0.792128	0.0154061	4.50046	5.68628	5.76596	LO_EC
chr19	61302960	61303360	Peak20030	-0.649996	0.0124634	5.98044	7.15024	6.83264	LO_EC
chr19	6276582	6276982	Peak20038	-0.916132	0.000132612	6.14705	7.62219	7.26439	LO_EC
chr19	6418202	6418602	Peak20052	-0.633786	0.0256179	5.51366	6.83613	6.41484	LO_EC
chr19	6552284	6552684	Peak20058	-0.750527	0.0323483	3.70353	5.17139	5.13716	LO_EC
chr19	7066946	7067346	Peak20074	-0.726443	0.00644496	5.70067	6.92396	6.67104	LO_EC
chr19	7131048	7131448	Peak20077	-0.68503	0.0338864	4.47011	5.86106	5.61752	LO_EC
chr19	8326509	8326909	Peak20108	-0.686159	0.03998	4.11227	5.64186	5.34164	LO_EC
chr19	8571016	8571416	Peak20109	-0.942138	0.0114325	3.58948	5.04132	5.2424	LO_EC
chr19	8572116	8572516	Peak20110	-1.3367	0.00211329	3.40838	4.74091	5.45417	LO_EC
chr19	8913687	8914087	Peak20127	-0.621779	0.049163	4.61703	5.96014	5.62875	LO_EC
chr19	8963157	8963557	Peak20131	-0.601167	0.0374117	5.50046	6.17131	6.36541	LO_EC
chr19	9028011	9028411	Peak20137	-0.672937	0.0290458	4.99272	6.18146	6.03533	LO_EC
chr19	9586440	9586840	Peak20147	-2.5208	1.82166e-07	3.18716	5.23031	6.19213	LO_EC
chr2	10185632	10186032	Peak20170	-0.733313	0.0428906	1.52329	4.76955	3.83667	LO_EC
chr2	101950450	101950850	Peak20175	-1.47926	0.000190818	4.19585	5.16997	6.09047	LO_EC
chr2	102026302	102026702	Peak20182	-0.615378	0.0256515	5.67332	6.52535	6.5215	LO_EC
chr2	103833080	103833480	Peak20213	-0.746248	0.0217106	4.46877	5.5005	5.67889	LO_EC
chr2	104444831	104445231	Peak20231	-0.910982	0.017569	3.2692	3.90063	5.07263	LO_EC
chr2	104726144	104726544	Peak20240	-0.682826	0.0439374	4.11456	4.53305	5.38946	LO_EC
chr2	105351059	105351459	Peak20257	-0.641421	0.0311366	5.32112	5.99596	6.2806	LO_EC
chr2	105531393	105531793	Peak20265	-0.812479	0.00823317	4.80248	6.28005	5.99948	LO_EC
chr2	115685090	115685490	Peak20361	-0.993116	0.00488713	3.94585	6.06386	5.47254	LO_EC
chr2	115834817	115835217	Peak20364	-0.816287	0.0296204	2.75256	4.56608	4.59044	LO_EC
chr2	116805574	116805974	Peak20381	-0.702812	0.0247044	4.702	6.18107	5.80538	LO_EC
chr2	118161772	118162172	Peak20401	-0.8523	0.0272135	2.26714	3.74091	4.41927	LO_EC
chr2	118571192	118571592	Peak20423	-1.18429	0.00074843	4.26456	6.40754	5.87156	LO_EC
chr2	119628500	119628900	Peak20474	-0.640442	0.0368745	4.67216	6.88079	5.67005	LO_EC
chr2	119683147	119683547	Peak20479	-0.812673	0.00592961	5.15411	6.11842	6.30085	LO_EC
chr2	119853073	119853473	Peak20484	-0.600147	0.0462305	5.0742	6.19122	5.98079	LO_EC
chr2	121096898	121097298	Peak20513	-0.720978	0.0145109	5.26817	6.46867	6.31492	LO_EC
chr2	121274725	121275125	Peak20521	-0.725541	0.000473867	6.71995	7.96331	7.57626	LO_EC
chr2	121374552	121374952	Peak20529	-0.82149	0.018925	3.89708	5.17029	5.34413	LO_EC
chr2	121827872	121828272	Peak20540	-0.747126	0.0420454	2.11399	4.28925	4.16414	LO_EC
chr2	121854120	121854520	Peak20541	-0.752992	0.00551081	5.56034	6.74213	6.57148	LO_EC
chr2	122011875	122012275	Peak20548	-2.5134	6.20564e-05	1.2692	5.80996	5.08978	LO_EC
chr2	122528300	122528700	Peak20567	-0.699399	0.0284845	4.435	6.20108	5.57254	LO_EC
chr2	125530637	125531037	Peak20590	-1.4067	6.8214e-05	4.52888	6.26082	6.25923	LO_EC
chr2	125549150	125549550	Peak20591	-0.751734	0.0383525	3.03085	4.6272	4.68875	LO_EC
chr2	125684642	125685042	Peak20594	-0.743181	0.00579377	5.57425	6.78268	6.56721	LO_EC
chr2	127250680	127251080	Peak20626	-1.22014	0.00352666	3.11513	5.54942	5.07182	LO_EC
chr2	127358164	127358564	Peak20633	-0.764583	0.0357731	3.11284	4.74324	4.78446	LO_EC
chr2	127540431	127540831	Peak20641	-0.699166	0.0393516	4.11284	4.87527	5.4002	LO_EC
chr2	127953035	127953435	Peak20650	-0.849378	0.000572701	5.91157	7.54531	6.97581	LO_EC
chr2	128992704	128993104	Peak20675	-0.944144	0.00525998	4.53103	4.92499	5.96391	LO_EC
chr2	129052046	129052446	Peak20679	-0.703911	0.0365216	4.15494	5.32814	5.41863	LO_EC
chr2	129418844	129419244	Peak20689	-1.87845	5.42784e-06	3.80212	6.33562	6.00696	LO_EC
chr2	130120741	130121141	Peak20702	-0.803931	0.0194691	3.85073	5.88638	5.23632	LO_EC
chr2	130952903	130953303	Peak20730	-0.715558	0.031587	4.03328	5.936	5.27205	LO_EC
chr2	130968374	130968774	Peak20731	-0.660243	0.0272535	5.2132	5.69991	6.20005	LO_EC
chr2	131654329	131654729	Peak20756	-0.772273	0.0341244	3.11055	4.74155	4.78446	LO_EC
chr2	131855371	131855771	Peak20764	-1.06963	0.000931181	4.64367	6.45895	6.09532	LO_EC
chr2	132419447	132419847	Peak20780	-1.02929	0.00938888	3.26611	4.43337	5.11181	LO_EC
chr2	132478211	132478611	Peak20783	-0.897425	0.018806	3.0357	4.87469	4.82242	LO_EC
chr2	142727099	142727499	Peak20873	-0.753166	0.00537584	5.58927	6.88113	6.59674	LO_EC
chr2	143371599	143371999	Peak20879	-0.805871	0.0243679	3.53189	5.64231	5.05832	LO_EC
chr2	146613097	146613497	Peak20945	-0.780687	0.0360476	2.52501	4.62766	4.45417	LO_EC
chr2	150469718	150470118	Peak21006	-0.753685	0.0255137	4.15383	5.06394	5.4617	LO_EC
chr2	150476313	150476713	Peak21007	-0.703863	0.0444016	3.53017	5.12976	4.95042	LO_EC
chr2	150483112	150483512	Peak21008	-0.678369	0.0141092	5.64506	6.09656	6.57757	LO_EC
chr2	151920784	151921184	Peak21055	-0.648395	0.0164162	5.61642	7.18604	6.48976	LO_EC
chr2	151940211	151940611	Peak21058	-0.734382	0.0333114	3.94392	5.34685	5.31203	LO_EC
chr2	151967737	151968137	Peak21060	-1.35006	0.000345708	4.11571	5.79621	5.89001	LO_EC
chr2	152015330	152015730	Peak21064	-0.635109	0.0380222	4.9436	6.26045	5.9203	LO_EC
chr2	152175560	152175960	Peak21070	-0.613873	0.0386092	5.22982	6.06403	6.14004	LO_EC
chr2	152221918	152222318	Peak21074	-0.751357	0.00162973	6.24938	7.36342	7.18765	LO_EC
chr2	152224485	152224885	Peak21075	-0.665984	0.00233107	6.5823	7.70674	7.38186	LO_EC
chr2	152240449	152240849	Peak21078	-0.88054	0.00311709	5.17307	6.30889	6.39539	LO_EC
chr2	152512437	152512837	Peak21087	-1.17	4.22207e-05	5.41874	6.70695	6.84391	LO_EC
chr2	153354990	153355390	Peak21130	-0.832383	0.0256742	2.94392	5.43456	4.68194	LO_EC
chr2	154246909	154247309	Peak21156	-0.872447	0.00771092	4.3698	6.18075	5.70191	LO_EC
chr2	154261823	154262223	Peak21159	-0.801285	0.0012514	6.1555	7.11793	7.17093	LO_EC
chr2	154395600	154396000	Peak21167	-0.677112	0.00375955	6.40546	7.57649	7.24672	LO_EC
chr2	154729660	154730060	Peak21181	-1.54592	0.00151224	2.75404	3.94821	5.16773	LO_EC
chr2	155299102	155299502	Peak21194	-0.720998	0.0308193	4.15605	5.69937	5.40434	LO_EC
chr2	155554942	155555342	Peak21207	-0.660276	0.0341258	4.75183	5.79621	5.79811	LO_EC
chr2	156665509	156665909	Peak21254	-0.760137	0.00431439	5.93203	7.12422	6.94294	LO_EC
chr2	156904890	156905290	Peak21266	-1.43789	7.42455e-05	4.30552	6.95982	6.0887	LO_EC
chr2	156960680	156961080	Peak21267	-0.609805	0.0419699	5.05329	6.32651	5.97157	LO_EC
chr2	157029804	157030204	Peak21269	-0.638613	0.0232863	5.48359	6.70706	6.37976	LO_EC
chr2	157386946	157387346	Peak21287	-0.654485	0.0497489	3.89974	6.12927	5.08978	LO_EC
chr2	157978610	157979010	Peak21310	-0.644951	0.0347403	5.07479	6.29041	6.07263	LO_EC
chr2	160481925	160482325	Peak21362	-0.736037	0.00918809	5.72751	5.91286	6.75201	LO_EC
chr2	160992351	160992751	Peak21371	-0.712966	0.0318973	3.89907	6.69986	5.14655	LO_EC
chr2	161164951	161165351	Peak21375	-0.646627	0.0419434	4.56139	5.9837	5.62315	LO_EC
chr2	163256918	163257318	Peak21410	-0.867835	0.0256515	2.26714	3.84867	4.41452	LO_EC
chr2	163433693	163434093	Peak21419	-0.770828	0.0247044	4.03328	5.12943	5.39298	LO_EC
chr2	164602675	164603075	Peak21457	-1.43426	0.00175177	3.11628	3.84828	5.32472	LO_EC
chr2	164720228	164720628	Peak21469	-1.02084	0.00821237	3.46832	4.82218	5.21811	LO_EC
chr2	164764101	164764501	Peak21473	-0.763606	0.0252515	3.85073	6.00741	5.1886	LO_EC
chr2	164961530	164961930	Peak21487	-0.963324	0.0105386	3.33802	5.69991	5.01908	LO_EC
chr2	165336850	165337250	Peak21503	-1.62175	0.000411878	3.39995	5.06343	5.61339	LO_EC
chr2	165856547	165856947	Peak21537	-0.653744	0.0477729	4.23088	5.87537	5.38153	LO_EC
chr2	166141906	166142306	Peak21549	-1.61638	0.000347937	3.33507	5.38083	5.51184	LO_EC
chr2	166228761	166229161	Peak21551	-1.41075	0.000646166	3.7533	5.39941	5.68428	LO_EC
chr2	166240394	166240794	Peak21552	-1.35693	0.00335935	2.5336	5.01886	4.84983	LO_EC
chr2	166243850	166244250	Peak21553	-0.742188	0.00982583	5.35351	6.40747	6.40444	LO_EC
chr2	166458206	166458606	Peak21563	-0.890509	0.00867308	4.23088	5.71439	5.63691	LO_EC
chr2	166539256	166539656	Peak21569	-1.07342	0.000250669	5.17389	6.61918	6.54577	LO_EC
chr2	168021221	168021621	Peak21635	-1.37524	0.00369474	2.26508	5.08471	4.72544	LO_EC
chr2	168439686	168440086	Peak21651	-1.34661	0.0050796	1.75109	4.39901	4.57156	LO_EC
chr2	168602569	168602969	Peak21665	-1.02037	0.0143167	2.11399	5.29041	4.40628	LO_EC
chr2	169554068	169554468	Peak21687	-1.10594	0.00431439	3.58618	5.70046	5.34164	LO_EC
chr2	169956454	169956854	Peak21701	-0.946781	0.00250041	4.70124	6.52529	6.03421	LO_EC
chr2	170355306	170355706	Peak21728	-0.665994	0.0161812	5.69933	6.52603	6.618	LO_EC
chr2	170499183	170499583	Peak21730	-1.15713	0.00810817	2.52329	4.39874	4.79811	LO_EC
chr2	170945855	170946255	Peak21735	-1.23617	0.00647713	2.4037	3.5632	4.82956	LO_EC
chr2	172131059	172131459	Peak21752	-0.656194	0.04161	4.59154	5.61181	5.68875	LO_EC
chr2	172553936	172554336	Peak21770	-1.41192	0.00121623	3.19476	5.72755	5.24703	LO_EC
chr2	172715205	172715605	Peak21779	-0.912637	0.0140594	3.64486	4.21155	5.29546	LO_EC
chr2	17593152	17593552	Peak21840	-1.08901	0.00596733	3.58865	3.74218	5.40499	LO_EC
chr2	177062434	177062834	Peak21849	-1.48082	0.00182232	2.64802	5.41603	4.9924	LO_EC
chr2	17854897	17855297	Peak21880	-2.12534	7.98068e-07	3.64565	6.04097	6.1126	LO_EC
chr2	178831550	178831950	Peak21884	-0.827336	0.0270548	3.11628	3.796	4.87926	LO_EC
chr2	17978015	17978415	Peak21907	-0.773489	0.00127714	6.21267	7.44282	7.17279	LO_EC
chr2	180054918	180055318	Peak21922	-1.38011	0.00245414	3.03449	3.84828	5.239	LO_EC
chr2	180862530	180862930	Peak21961	-0.910601	0.0124972	3.85073	5.0653	5.43511	LO_EC
chr2	180921692	180922092	Peak21966	-0.757361	0.00876528	5.24703	6.64106	6.31873	LO_EC
chr2	181145694	181146094	Peak21977	-0.81875	0.0297185	2.75404	4.62651	4.62148	LO_EC
chr2	18598173	18598573	Peak22009	-0.997757	0.00647713	3.69972	6.04218	5.31016	LO_EC
chr2	18610434	18610834	Peak22011	-0.962876	0.0140432	3.03328	4.65569	4.88612	LO_EC
chr2	18828272	18828672	Peak22016	-0.906663	0.0169168	3.18934	5.1706	4.94234	LO_EC
chr2	23762458	23762858	Peak22094	-0.663788	0.0216135	5.371	6.08546	6.32346	LO_EC
chr2	23764227	23764627	Peak22095	-0.862372	0.0173365	3.58948	5.15024	5.16001	LO_EC
chr2	24774988	24775388	Peak22109	-0.665813	0.0200727	5.51257	6.68501	6.46316	LO_EC
chr2	24981601	24982001	Peak22116	-1.71724	0.00065444	2.40745	6.45985	4.91664	LO_EC
chr2	25838774	25839174	Peak22153	-0.632965	0.00225177	6.9607	7.94814	7.70456	LO_EC
chr2	25910779	25911179	Peak22155	-0.884818	0.00175177	5.37243	6.5803	6.55843	LO_EC
chr2	25946757	25947157	Peak22158	-0.723325	0.0317829	3.85279	6.20077	5.1285	LO_EC
chr2	25978198	25978598	Peak22159	-0.771956	0.0285167	3.59277	5.69838	5.05445	LO_EC
chr2	26129093	26129493	Peak22167	-0.853064	0.0250147	2.75256	4.65637	4.61132	LO_EC
chr2	26198390	26198790	Peak22171	-0.803572	0.0182988	4.11742	5.38124	5.48164	LO_EC
chr2	26315043	26315443	Peak22178	-0.684988	0.0287433	4.67216	6.0531	5.75713	LO_EC
chr2	26459656	26460056	Peak22187	-0.685231	0.0223001	5.30025	6.41549	6.32506	LO_EC
chr2	26502372	26502772	Peak22191	-0.996489	0.001739	4.80461	6.25986	6.18341	LO_EC
chr2	26541762	26542162	Peak22193	-2.1845	9.58958e-06	3.26714	3.12911	5.95577	LO_EC
chr2	27233438	27233838	Peak22208	-0.783993	0.0289147	3.26611	5.48483	4.81163	LO_EC
chr2	27331016	27331416	Peak22215	-0.664768	0.00455102	6.40546	7.57616	7.22521	LO_EC
chr2	27395612	27396012	Peak22218	-1.04084	2.86767e-05	5.87628	7.00684	7.12421	LO_EC
chr2	28273597	28273997	Peak22232	-0.770473	0.0368962	2.53017	5.04132	4.34413	LO_EC
chr2	28368451	28368851	Peak22240	-1.99347	6.0846e-05	2.74962	6.50075	5.30761	LO_EC
chr2	28369983	28370383	Peak22241	-1.20083	0.00140741	3.94392	5.88695	5.65659	LO_EC
chr2	28388759	28389159	Peak22245	-0.676007	0.0262458	5.17609	6.43331	6.21003	LO_EC
chr2	28471890	28472290	Peak22252	-0.71472	0.0438017	3.33409	4.84887	4.83925	LO_EC
chr2	29071759	29072159	Peak22272	-0.682609	0.0477581	3.69972	4.97233	5.03688	LO_EC
chr2	29724581	29724981	Peak22307	-0.726364	0.00613525	5.73768	7.27983	6.69677	LO_EC
chr2	29820732	29821132	Peak22310	-0.658781	0.00501061	6.35496	7.27518	7.17176	LO_EC
chr2	29917261	29917661	Peak22316	-0.648866	0.0120945	5.79097	7.37693	6.64172	LO_EC
chr2	30270979	30271379	Peak22338	-0.893631	0.00233107	4.98898	6.8929	6.20755	LO_EC
chr2	30300881	30301281	Peak22341	-0.830093	0.00844571	4.55887	6.54869	5.80538	LO_EC
chr2	30327343	30327743	Peak22342	-0.706463	0.0256179	4.43683	6.64913	5.56672	LO_EC
chr2	30400571	30400971	Peak22346	-0.732098	0.0263208	4.19368	6.05336	5.42571	LO_EC
chr2	30508050	30508450	Peak22350	-0.71377	0.0469593	2.85279	5.08622	4.47709	LO_EC
chr2	30513931	30514331	Peak22351	-1.19432	0.000145142	4.85176	6.84294	6.36082	LO_EC
chr2	30542771	30543171	Peak22352	-0.988355	0.00925654	3.58865	4.87334	5.29803	LO_EC
chr2	30613892	30614292	Peak22361	-0.625577	0.00689805	6.49903	7.36335	7.26649	LO_EC
chr2	30628055	30628455	Peak22363	-0.936223	0.00446996	4.61824	5.56452	6.00896	LO_EC
chr2	30634744	30635144	Peak22364	-0.788655	6.42278e-05	6.88739	7.80945	7.80084	LO_EC
chr2	31325514	31325914	Peak22402	-0.807809	0.00128911	5.93381	6.8294	6.9574	LO_EC
chr2	31427966	31428366	Peak22405	-0.751233	0.00108807	6.43603	7.31312	7.3579	LO_EC
chr2	31944165	31944565	Peak22425	-0.779944	0.0333805	2.94134	5.08521	4.64706	LO_EC
chr2	32017684	32018084	Peak22432	-0.69129	0.0281389	4.80603	5.78284	5.9027	LO_EC
chr2	32436938	32437338	Peak22458	-1.41146	0.00164019	3.19368	4.97341	5.32977	LO_EC
chr2	32986603	32987003	Peak22494	-0.669041	0.00187352	6.69393	7.63358	7.49288	LO_EC
chr2	33040752	33041152	Peak22495	-0.890301	0.0214665	2.85416	4.65637	4.73966	LO_EC
chr2	33286849	33287249	Peak22501	-0.756712	0.0256825	4.07243	5.36297	5.40085	LO_EC
chr2	34726346	34726746	Peak22545	-0.8606	0.00108047	5.86245	6.9123	6.97501	LO_EC
chr2	34760540	34760940	Peak22546	-0.61023	0.00395948	6.83469	7.88686	7.55975	LO_EC
chr2	34854441	34854841	Peak22550	-0.76693	0.0354643	3.11399	4.12813	4.78714	LO_EC
chr2	35153429	35153829	Peak22559	-0.759535	0.0300374	3.64723	5.1496	5.08083	LO_EC
chr2	37631635	37632035	Peak22603	-0.655474	0.045115	4.07361	6.36311	5.20792	LO_EC
chr2	38279915	38280315	Peak22615	-1.79993	7.49198e-07	4.2692	7.17096	6.30342	LO_EC
chr2	38440825	38441225	Peak22622	-0.78403	0.0253992	3.64327	5.58006	5.0868	LO_EC
chr2	39469719	39470119	Peak22654	-1.26289	0.00112939	3.85073	5.65625	5.63079	LO_EC
chr2	41197166	41197566	Peak22658	-0.833676	0.0284979	2.64486	3.28896	4.62259	LO_EC
chr2	43410585	43410985	Peak22664	-0.755829	0.0363836	3.11628	4.8745	4.72648	LO_EC
chr2	44880058	44880458	Peak22679	-0.74322	0.0428055	2.11399	4.3638	4.14863	LO_EC
chr2	44964878	44965278	Peak22681	-0.912183	0.0185089	2.85416	4.97305	4.71495	LO_EC
chr2	44972628	44973028	Peak22682	-0.742304	0.018317	4.50002	6.49275	5.65202	LO_EC
chr2	45080897	45081297	Peak22683	-1.02432	0.00950778	3.03328	5.72894	4.87674	LO_EC
chr2	45591794	45592194	Peak22687	-1.02055	0.00809521	3.4037	5.36408	5.14863	LO_EC
chr2	4802918	4803318	Peak22694	-0.696984	0.0270146	4.64525	6.09689	5.75951	LO_EC
chr2	4839862	4840262	Peak22696	-0.878011	0.00256106	5.15466	6.74902	6.36116	LO_EC
chr2	4862543	4862943	Peak22697	-0.964304	0.0166827	2.64486	3.50025	4.73308	LO_EC
chr2	4875247	4875647	Peak22699	-0.913737	0.0158846	3.52845	3.50226	5.25429	LO_EC
chr2	5141068	5141468	Peak22732	-0.642941	0.0333114	5.24729	5.19083	6.22219	LO_EC
chr2	54011133	54011533	Peak22767	-1.0742	0.0119054	2.1071	4.94895	4.46338	LO_EC
[truncated: 1,196 more rows]

## Sheet: 2A-LEPSCvsDEPSC
chr	Start	End	PeakID	LEPSC_DEPSC_logFC	LEPSC_DEPSC_FDR	Normalized_reads_ESC	Normalized_reads_DEPSC	Normalized_reads_LEPSC	status
chr1	101560344	101560744	Peak7	0.657323	0.0419725	4.19585	2.74049	4.64301	LO_DC
chr1	104707936	104708336	Peak22	1.2938	0.000625065	5.52953	3.79478	5.75013	LO_DC
chr1	108713390	108713790	Peak59	0.697565	0.0349487	3.4728	3.43337	5.16849	LO_DC
chr1	114349159	114349559	Peak80	1.0582	0.00533189	4.69895	2.84867	5.04917	LO_DC
chr1	114676296	114676696	Peak83	0.684923	0.0350785	4.03267	4.12781	5.51406	LO_DC
chr1	120539187	120539587	Peak117	0.712265	0.0145199	6.25751	5.14944	6.23129	LO_DC
chr1	121295232	121295632	Peak146	0.757115	0.00963633	5.77828	5.21109	6.34844	LO_DC
chr1	127611929	127612329	Peak211	0.891472	0.0117355	4.46877	3.21002	5.11473	LO_DC
chr1	127947961	127948361	Peak215	0.701653	0.0343379	4.2314	3.21002	4.9291	LO_DC
chr1	129067509	129067909	Peak223	1.0111	0.00610118	5.37052	3.2094	5.16979	LO_DC
chr1	13074996	13075396	Peak255	1.47056	7.42424e-07	6.9392	5.06394	6.80084	LO_DC
chr1	13136285	13136685	Peak266	0.710557	0.0275128	4.8521	4.21063	5.55599	LO_DC
chr1	132142844	132143244	Peak269	0.909909	0.00943461	4.49826	3.68495	5.43745	LO_DC
chr1	134367505	134367905	Peak346	1.29179	0.000197603	5.3363	4.46694	6.24168	LO_DC
chr1	136431650	136432050	Peak444	1.21424	0.000372011	5.19259	4.53256	6.24338	LO_DC
chr1	14733181	14733581	Peak613	1.389	0.000177605	5.81619	3.99498	5.93031	LO_DC
chr1	152933559	152933959	Peak633	0.686697	0.0329506	4.3015	4.32686	5.6384	LO_DC
chr1	153067222	153067622	Peak639	0.760174	0.022201	4.75109	3.79641	5.33161	LO_DC
chr1	153391652	153392052	Peak652	0.894396	0.00811417	5.63021	3.99569	5.56029	LO_DC
chr1	154640871	154641271	Peak680	0.942158	0.00189876	5.94489	5.0427	6.4169	LO_DC
chr1	154856435	154856835	Peak693	0.613874	0.024312	6.5822	5.79651	6.6797	LO_DC
chr1	154962481	154962881	Peak703	0.651285	0.0443214	3.70048	4.08555	5.44382	LO_DC
chr1	155223627	155224027	Peak714	0.748474	0.00909158	5.89824	5.78428	6.88184	LO_DC
chr1	167896666	167897066	Peak936	0.64796	0.0470118	3.94521	3.436	5.04611	LO_DC
chr1	168065135	168065535	Peak942	0.857882	0.0131585	3.4728	3.79682	5.5289	LO_DC
chr1	168072575	168072975	Peak943	1.31958	9.43583e-05	5.05149	4.7424	6.49876	LO_DC
chr1	172801581	172801981	Peak1026	0.604906	0.0485256	5.21213	4.92443	5.96022	LO_DC
chr1	172819448	172819848	Peak1028	0.877701	0.00879143	5.2486	4.08555	5.62109	LO_DC
chr1	177944024	177944424	Peak1148	0.639753	0.0444351	4.46653	4.46797	5.69463	LO_DC
chr1	179649202	179649602	Peak1166	0.690136	0.0343999	5.1555	3.89911	5.30179	LO_DC
chr1	181298856	181299256	Peak1196	0.795987	0.0196816	4.75293	3.28779	5.04834	LO_DC
chr1	184033539	184033939	Peak1295	0.647902	0.0208111	5.77647	5.68551	6.63969	LO_DC
chr1	188085342	188085742	Peak1363	1.50333	1.82798e-05	5.4847	4.50075	6.40976	LO_DC
chr1	188187108	188187508	Peak1364	0.909374	0.0112932	4.8039	2.50125	4.7188	LO_DC
chr1	192838198	192838598	Peak1431	0.784374	0.0213199	4.43683	3.04201	4.90654	LO_DC
chr1	194346737	194347137	Peak1478	0.80207	0.015786	5.64822	4.04235	5.55442	LO_DC
chr1	20751489	20751889	Peak1528	0.70859	0.0319335	4.46832	3.79478	5.3178	LO_DC
chr1	20764182	20764582	Peak1529	0.808445	0.0128226	5.30352	4.32658	5.74498	LO_DC
chr1	30470634	30471034	Peak1573	0.760362	0.0236136	3.40183	2.84552	4.91908	LO_DC
chr1	30904511	30904911	Peak1577	0.932317	0.00849377	5.51431	3.50326	5.2825	LO_DC
chr1	30940675	30941075	Peak1580	0.645235	0.0441338	5.97934	3.94895	5.21539	LO_DC
chr1	34097956	34098356	Peak1606	0.65231	0.0447962	5.17142	3.90101	5.29476	LO_DC
chr1	35277136	35277536	Peak1640	1.19409	0.00043878	5.48448	4.5	6.19628	LO_DC
chr1	35289386	35289786	Peak1641	0.613958	0.0368887	6.10559	5.21186	6.17821	LO_DC
chr1	36861034	36861434	Peak1689	0.645881	0.0326816	5.63261	4.97179	6.03379	LO_DC
chr1	37000612	37001012	Peak1694	0.724731	0.0270755	4.94585	3.89949	5.34595	LO_DC
chr1	38880831	38881231	Peak1738	0.729137	0.0149488	6.65818	4.82258	5.96833	LO_DC
chr1	4845553	4845953	Peak1838	0.674593	0.022201	6.55249	5.01939	6.08273	LO_DC
chr1	52994803	52995203	Peak1886	0.645735	0.0420172	2.53017	2.62812	4.67402	LO_DC
chr1	53582877	53583277	Peak1894	0.718975	0.0290426	4.82628	3.79682	5.2851	LO_DC
chr1	58818677	58819077	Peak1958	0.66087	0.0216826	5.60393	5.59732	6.60196	LO_DC
chr1	62711577	62711977	Peak2021	0.753489	0.0157566	5.76639	4.6272	5.88487	LO_DC
chr1	63185106	63185506	Peak2043	0.734647	0.0115459	5.89874	5.28852	6.39845	LO_DC
chr1	7058764	7059164	Peak2118	1.2778	0.00178638	3.94521	2.74218	5.21612	LO_DC
chr1	72251751	72252151	Peak2141	0.646379	0.0282937	5.80248	5.19114	6.2134	LO_DC
chr1	72359579	72359979	Peak2152	0.768579	0.0121472	5.63121	4.79621	6.02956	LO_DC
chr1	77450391	77450791	Peak2284	0.675507	0.0369312	4.33998	4.21094	5.55814	LO_DC
chr1	8571934	8572334	Peak2366	1.00887	0.000692148	6.3878	5.01834	6.41333	LO_DC
chr1	88132973	88133373	Peak2385	0.792127	0.00930022	5.54523	4.94729	6.18658	LO_DC
chr1	89193924	89194324	Peak2435	0.632838	0.0499086	3.03085	4.28954	5.5973	LO_DC
chr1	90363199	90363599	Peak2461	0.683037	0.0376071	4.96774	3.68496	5.19288	LO_DC
chr1	98521943	98522343	Peak2620	0.661478	0.0433791	4.67255	3.28721	4.90654	LO_DC
chr10	101833165	101833565	Peak2639	0.700667	0.0309349	5.17362	3.99463	5.37244	LO_DC
chr10	105443148	105443548	Peak2657	0.805704	0.00833978	6.21106	4.9973	6.25102	LO_DC
chr10	107881449	107881849	Peak2675	0.707173	0.0332593	4.74999	3.29186	5.03771	LO_DC
chr10	110368867	110369267	Peak2704	0.671755	0.0210794	5.86416	5.34601	6.3834	LO_DC
chr10	111350450	111350850	Peak2740	0.65975	0.033837	4.50002	4.79662	5.94967	LO_DC
chr10	117898144	117898544	Peak2841	0.673879	0.0200733	5.48492	5.36339	6.39484	LO_DC
chr10	118681178	118681578	Peak2849	0.731802	0.0172248	5.85193	4.74112	5.93815	LO_DC
chr10	119825585	119825985	Peak2877	0.74571	0.01948	4.30552	4.62674	5.94638	LO_DC
chr10	120857197	120857597	Peak2914	0.779132	0.0137871	5.31888	4.65592	5.97523	LO_DC
chr10	128793509	128793909	Peak3138	0.762591	0.022084	4.07479	3.94968	5.50799	LO_DC
chr10	14180030	14180430	Peak3165	0.757117	0.0249178	4.46743	3.04201	4.88705	LO_DC
chr10	21565453	21565853	Peak3286	0.852123	0.00866707	5.07508	4.4672	5.89683	LO_DC
chr10	30457154	30457554	Peak3404	0.87736	0.00489544	5.23061	4.84966	6.20655	LO_DC
chr10	34607562	34607962	Peak3446	0.731286	0.0239532	4.77683	4.25033	5.6252	LO_DC
chr10	3464078	3464478	Peak3447	0.888854	0.012036	4.19368	3.21002	5.13428	LO_DC
chr10	36643902	36644302	Peak3463	0.779292	0.0212555	4.46474	3.62582	5.31457	LO_DC
chr10	36655695	36656095	Peak3464	1.04867	0.00585202	4.11399	2.6272	4.97318	LO_DC
chr10	38569932	38570332	Peak3479	0.816045	0.0124875	4.75146	4.32658	5.76223	LO_DC
chr10	41120951	41121351	Peak3538	1.74818	2.88342e-05	5.05597	3.68672	6.05181	LO_DC
chr10	41135226	41135626	Peak3539	0.982373	0.00683369	4.72526	3.43232	5.32472	LO_DC
chr10	41512131	41512531	Peak3558	0.72814	0.0105972	6.25777	5.30803	6.37943	LO_DC
chr10	41717396	41717796	Peak3564	1.18717	0.000995691	5.54544	3.99605	5.80719	LO_DC
chr10	62645115	62645515	Peak3931	1.40993	3.86561e-06	4.96774	5.28838	7.00085	LO_DC
chr10	64496242	64496642	Peak3956	0.989839	0.00715001	2.74667	2.2094	4.92577	LO_DC
chr10	67692884	67693284	Peak4010	1.1571	0.00338242	4.64565	2.62444	5.0222	LO_DC
chr10	70340824	70341224	Peak4067	1.09926	0.00149925	4.96774	4.25003	5.94474	LO_DC
chr10	75902201	75902601	Peak4161	1.14605	0.0016043	4.92396	3.94931	5.78397	LO_DC
chr10	83226630	83227030	Peak4484	0.793179	0.020307	4.43912	2.84631	4.86382	LO_DC
chr10	95346332	95346732	Peak4760	1.15508	0.000811779	6.13306	4.3263	6.02998	LO_DC
chr10	95439414	95439814	Peak4763	0.730693	0.0287307	4.30251	3.28954	4.99154	LO_DC
chr10	98672079	98672479	Peak4790	0.668141	0.0418092	4.30351	3.50025	5.08164	LO_DC
chr11	100136022	100136422	Peak4819	0.724148	0.0231324	6.10386	4.17044	5.47254	LO_DC
chr11	100237288	100237688	Peak4827	1.00943	0.000388133	5.9896	5.36311	6.71109	LO_DC
chr11	102306688	102307088	Peak4962	0.737948	0.0234513	5.26508	4.12911	5.53547	LO_DC
chr11	103201981	103202381	Peak5017	0.734607	0.0260403	4.19639	4.04201	5.53269	LO_DC
chr11	103249115	103249515	Peak5021	1.10299	0.00272407	4.92396	3.68628	5.57467	LO_DC
chr11	104150432	104150832	Peak5053	0.764294	0.00239387	7.47204	5.98316	6.99595	LO_DC
chr11	104156975	104157375	Peak5054	0.742042	0.0169732	5.60454	4.68562	5.92076	LO_DC
chr11	104839284	104839684	Peak5070	0.764706	0.0169901	5.38519	4.6865	6.02998	LO_DC
chr11	113595408	113595808	Peak5238	0.760663	0.0223088	4.37171	3.84749	5.40085	LO_DC
chr11	115817743	115818143	Peak5356	1.0753	0.00234261	5.30251	3.99463	5.74017	LO_DC
chr11	116950027	116950427	Peak5437	1.00927	0.0016043	6.26791	4.53256	6.02914	LO_DC
chr11	120524970	120525370	Peak5634	1.69045	5.81091e-07	6.02286	4.84828	6.86144	LO_DC
chr11	13040780	13041180	Peak5697	0.639513	0.0496552	4.19097	3.74176	5.18658	LO_DC
chr11	16507929	16508329	Peak5715	0.669694	0.0255111	6.24834	4.92499	6.00696	LO_DC
chr11	17783218	17783618	Peak5728	0.769825	0.0194856	5.0739	3.99641	5.46629	LO_DC
chr11	19885412	19885812	Peak5759	0.694814	0.0235735	5.89941	4.68473	5.84455	LO_DC
chr11	21069325	21069725	Peak5800	1.69321	1.08135e-06	5.96789	4.5005	6.54577	LO_DC
chr11	22361240	22361640	Peak5813	0.726575	0.0275087	5.3698	3.74133	5.22823	LO_DC
chr11	22520911	22521311	Peak5819	0.60342	0.0135231	6.63905	6.41669	7.20655	LO_DC
chr11	26067312	26067712	Peak5877	0.884768	0.00439086	6.23898	4.76997	6.12967	LO_DC
chr11	27312545	27312945	Peak5886	0.632497	0.0499899	3.19151	3.04132	4.809	LO_DC
chr11	28482232	28482632	Peak5894	0.76454	0.0183938	5.05299	4.3263	5.72124	LO_DC
chr11	31644456	31644856	Peak5949	1.26899	0.000663149	4.69972	3.99498	5.90654	LO_DC
chr11	33433588	33433988	Peak6016	0.687648	0.0266401	5.40628	4.71385	5.89467	LO_DC
chr11	33437425	33437825	Peak6017	0.747359	0.00743764	6.96678	5.34489	6.41452	LO_DC
chr11	33451011	33451411	Peak6019	1.06051	0.00186139	5.37147	4.21094	5.86335	LO_DC
chr11	4590399	4590799	Peak6196	0.756241	0.014527	6.18232	4.62628	5.86856	LO_DC
chr11	46363279	46363679	Peak6211	0.824369	0.017305	4.92069	3.03925	4.95042	LO_DC
chr11	52294182	52294582	Peak6373	0.70093	0.0343999	4.33655	3.43285	5.08164	LO_DC
chr11	53074076	53074476	Peak6379	0.670474	0.0359186	5.21052	4.32658	5.60148	LO_DC
chr11	54767456	54767856	Peak6441	0.922963	0.00451839	4.46832	4.71299	6.17923	LO_DC
chr11	55137350	55137750	Peak6457	0.885912	0.0115802	4.87679	3.36325	5.17616	LO_DC
chr11	5938943	5939343	Peak6574	0.633191	0.0436635	5.13743	4.76914	5.93121	LO_DC
chr11	62228561	62228961	Peak6684	0.64701	0.0468631	4.23035	3.12781	4.809	LO_DC
chr11	62242425	62242825	Peak6685	1.51083	0.000415891	4.50221	3.21002	5.63135	LO_DC
chr11	64214146	64214546	Peak6744	0.947197	0.00909813	3.4037	3.21186	5.22355	LO_DC
chr11	65308427	65308827	Peak6759	0.687002	0.0374521	4.98898	3.21186	4.83925	LO_DC
chr11	6673337	6673737	Peak6775	0.74767	0.0135231	5.45153	5.10766	6.29932	LO_DC
chr11	6678557	6678957	Peak6779	0.732152	0.022485	4.96552	4.56656	5.89591	LO_DC
chr11	69517553	69517953	Peak6881	0.866262	0.00678956	4.61662	4.71407	6.11113	LO_DC
chr11	71411261	71411661	Peak6954	0.840768	0.01309	5.05448	3.79641	5.39604	LO_DC
chr11	72114720	72115120	Peak6969	0.702208	0.0200628	5.46788	4.97215	6.1082	LO_DC
chr11	73132004	73132404	Peak7009	0.92884	0.00553099	6.37835	4.08755	5.63488	LO_DC
chr11	73953558	73953958	Peak7011	0.689153	0.0332593	4.26456	4.28896	5.64098	LO_DC
chr11	79544917	79545317	Peak7221	1.20882	0.00139601	4.40324	3.79641	5.75764	LO_DC
chr11	79565810	79566210	Peak7222	0.864487	0.00413523	5.76566	5.01851	6.31144	LO_DC
chr11	8505176	8505576	Peak7345	0.690744	0.0143667	5.82715	5.51724	6.53189	LO_DC
chr11	85579760	85580160	Peak7357	0.996302	0.00259876	5.8289	4.50276	6.05293	LO_DC
chr11	88829692	88830092	Peak7492	0.782031	0.0190366	4.80177	3.90063	5.43682	LO_DC
chr11	88929278	88929678	Peak7501	1.09485	0.000650882	5.97714	4.77039	6.31966	LO_DC
chr11	93834210	93834610	Peak7534	0.863236	0.012265	4.779	3.62674	5.32725	LO_DC
chr11	97496894	97497294	Peak7746	0.667913	0.0322862	6.04272	4.46746	5.63433	LO_DC
chr11	97534464	97534864	Peak7750	0.696972	0.0290601	4.87612	4.43232	5.72648	LO_DC
chr12	100599363	100599763	Peak7866	0.719092	0.0287897	4.34047	4.04167	5.5251	LO_DC
chr12	103834710	103835110	Peak7952	0.645269	0.0449134	5.88848	3.84907	5.14863	LO_DC
chr12	106314786	106315186	Peak8016	1.21533	0.00111601	5.57425	3.946	5.85906	LO_DC
chr12	109950897	109951297	Peak8106	0.64847	0.0448955	2.64486	3.04132	4.8559	LO_DC
chr12	111926237	111926637	Peak8162	0.859352	0.00410203	6.30138	5.06343	6.34322	LO_DC
chr12	112908589	112908989	Peak8210	0.694143	0.0154537	5.63201	5.51811	6.55707	LO_DC
chr12	12916468	12916868	Peak8392	0.640797	0.0398152	5.64307	4.76997	5.90823	LO_DC
chr12	15859456	15859856	Peak8407	0.914244	0.0102969	4.43592	3.28838	5.19138	LO_DC
chr12	17200147	17200547	Peak8429	0.697656	0.0349672	3.58948	3.43337	5.09275	LO_DC
chr12	19298244	19298644	Peak8459	0.654299	0.0236615	5.8039	5.34531	6.34629	LO_DC
chr12	20811332	20811732	Peak8468	1.05358	0.00569717	2.75257	2.74218	5.11181	LO_DC
chr12	20812564	20812964	Peak8469	1.73271	6.68412e-06	4.40464	4.24913	6.44467	LO_DC
chr12	20819657	20820057	Peak8470	1.52901	0.000214935	4.26611	3.56368	5.82242	LO_DC
chr12	20920449	20920849	Peak8474	0.861996	0.00828238	4.07302	4.56512	6.00696	LO_DC
chr12	33958011	33958411	Peak8611	0.747349	0.0157121	5.19287	4.84907	6.08572	LO_DC
chr12	39456218	39456618	Peak8665	0.860174	0.00639063	5.01145	4.76955	6.13217	LO_DC
chr12	48230764	48231164	Peak8735	0.723079	0.0246733	4.0742	4.46848	5.809	LO_DC
chr12	66216135	66216535	Peak8896	1.20877	0.000782061	6.41171	3.89797	5.70967	LO_DC
chr12	66529138	66529538	Peak8902	0.764556	0.0179874	5.24677	4.36352	5.74119	LO_DC
chr12	71812101	71812501	Peak8954	0.861368	0.00988652	4.64446	4.21124	5.74309	LO_DC
chr12	72731439	72731839	Peak8980	0.786665	0.0183712	5.05299	3.84867	5.38704	LO_DC
chr12	73112413	73112813	Peak8986	0.658368	0.0414189	5.40628	3.99534	5.31457	LO_DC
chr12	73816936	73817336	Peak9004	1.04033	0.00538509	4.53146	3.21308	5.25959	LO_DC
chr12	80952857	80953257	Peak9163	0.646154	0.0291524	5.35496	5.21124	6.24204	LO_DC
chr12	81324627	81325027	Peak9190	0.771739	0.00807103	6.31022	5.26992	6.4115	LO_DC
chr12	86956333	86956733	Peak9343	0.859511	0.0102969	4.30351	4.17108	5.71109	LO_DC
chr12	86962044	86962444	Peak9344	0.935939	0.00191744	5.77846	5.01921	6.3834	LO_DC
chr12	87845272	87845672	Peak9372	1.8525	7.73319e-09	6.83347	4.68451	6.80785	LO_DC
chr12	88244719	88245119	Peak9395	0.892715	0.00862329	5.19097	4.08555	5.67096	LO_DC
chr13	102209022	102209422	Peak9528	0.653894	0.0421562	4.82768	4.17044	5.47315	LO_DC
chr13	102876089	102876489	Peak9537	0.609694	0.0376897	5.96631	5.32616	6.28215	LO_DC
chr13	105704583	105704983	Peak9585	0.714779	0.0214118	4.11456	4.99712	6.21166	LO_DC
chr13	105706725	105707125	Peak9586	0.85712	0.0115142	4.53017	3.99676	5.59521	LO_DC
chr13	108663476	108663876	Peak9617	0.797271	0.0171346	5.64466	3.74049	5.27728	LO_DC
chr13	112351152	112351552	Peak9674	0.629637	0.0467789	2.85416	2.74473	4.71495	LO_DC
chr13	113203018	113203418	Peak9698	0.966341	0.00511936	5.33973	4.04132	5.69214	LO_DC
chr13	118811739	118812139	Peak9785	0.985588	0.00149925	5.42083	4.89968	6.33697	LO_DC
chr13	118824441	118824841	Peak9786	0.778291	0.0210558	5.21026	3.56704	5.22157	LO_DC
chr13	13005345	13005745	Peak9819	0.769443	0.0115142	6.26469	4.99658	6.21576	LO_DC
chr13	13539269	13539669	Peak9826	0.693678	0.0341132	5.53082	3.68628	5.12348	LO_DC
chr13	18933758	18934158	Peak9881	0.988825	0.00230055	5.86399	4.43311	5.94638	LO_DC
chr13	21957250	21957650	Peak9946	1.03016	0.00149925	5.79025	4.56392	6.09828	LO_DC
chr13	22798757	22799157	Peak9973	0.773808	0.0206202	3.64327	3.94821	5.50516	LO_DC
chr13	29369933	29370333	Peak10081	0.650633	0.0460192	4.75183	3.62674	5.07783	LO_DC
chr13	40812575	40812975	Peak10229	1.00842	0.00476793	5.37195	3.62582	5.40976	LO_DC
chr13	41240780	41241180	Peak10249	0.610597	0.0204846	6.43798	6.04158	6.8855	LO_DC
chr13	41833105	41833505	Peak10259	1.0144	0.0032445	5.19287	4.08622	5.74447	LO_DC
chr13	43680684	43681084	Peak10291	0.884924	0.00780792	4.89808	4.28896	5.79629	LO_DC
chr13	44181228	44181628	Peak10302	0.911335	0.00892488	4.67255	3.796	5.51022	LO_DC
chr13	45034823	45035223	Peak10328	0.904003	0.00699258	4.53017	4.28896	5.8242	LO_DC
chr13	4657636	4658036	Peak10351	0.887122	0.00753204	4.94682	4.36407	5.86509	LO_DC
chr13	51190572	51190972	Peak10436	0.804307	0.0174663	5.05358	3.6272	5.24897	LO_DC
chr13	53279496	53279896	Peak10484	0.69488	0.0195326	5.35521	5.12862	6.22761	LO_DC
chr13	53556708	53557108	Peak10494	0.640061	0.0337003	6.21079	4.89968	5.94967	LO_DC
chr13	5583262	5583662	Peak10582	0.66632	0.0359507	5.58824	4.32715	5.57099	LO_DC
chr13	61286607	61287007	Peak10706	0.743986	0.0236824	4.77792	3.94858	5.40976	LO_DC
chr13	62179693	62180093	Peak10711	0.728553	0.0165914	6.16376	4.99658	6.17654	LO_DC
chr13	62491730	62492130	Peak10722	1.93793	8.5024e-06	3.75404	3.50175	6.10231	LO_DC
chr13	62612002	62612402	Peak10724	1.35924	0.000143752	5.97887	4.17076	6.02801	LO_DC
chr13	63134331	63134731	Peak10736	0.79235	0.0197669	4.43546	3.49925	5.21066	LO_DC
chr13	74613872	74614272	Peak10919	0.780128	0.0217321	3.64327	3.21063	5.06054	LO_DC
chr13	76666904	76667304	Peak10951	1.01386	0.00232713	5.97871	4.2907	5.86636	LO_DC
chr13	84072376	84072776	Peak11011	0.627483	0.0432999	5.21267	4.76809	5.88019	LO_DC
chr13	88869204	88869604	Peak11048	0.976391	0.00669017	5.33728	3.43232	5.26223	LO_DC
chr13	95135307	95135707	Peak11120	0.967305	0.00410203	5.91141	4.08555	5.66606	LO_DC
chr13	95632447	95632847	Peak11131	0.657446	0.0396899	5.21026	4.28896	5.54577	LO_DC
chr13	96284659	96285059	Peak11154	0.747445	0.0260644	3.99179	3.43232	5.15434	LO_DC
chr14	108248987	108249387	Peak11345	0.885398	0.0115974	4.85279	3.36325	5.17616	LO_DC
chr14	118252043	118252443	Peak11374	1.00155	0.00674752	4.72638	3.20879	5.21811	LO_DC
chr14	118768201	118768601	Peak11388	0.717603	0.00789024	6.2124	5.74165	6.74163	LO_DC
chr14	118774040	118774440	Peak11389	0.881851	0.011114	4.33851	3.90177	5.61434	LO_DC
chr14	120754645	120755045	Peak11430	0.670027	0.0412824	4.40698	3.56512	5.10967	LO_DC
chr14	121905572	121905972	Peak11456	0.970972	3.58204e-05	6.9343	6.16046	7.34691	LO_DC
chr14	12795087	12795487	Peak11527	1.00564	0.0048591	4.15772	3.94931	5.7336	LO_DC
chr14	18035991	18036391	Peak11585	0.826148	0.0132131	4.8751	4.08688	5.60924	LO_DC
chr14	22305337	22305737	Peak11658	1.43042	0.000342832	5.35399	3.62536	5.76324	LO_DC
chr14	24968044	24968444	Peak11690	0.667946	0.0397173	4.40417	4.08555	5.46003	LO_DC
chr14	39103252	39103652	Peak11932	1.01309	0.00639063	5.03146	3.2094	5.25307	LO_DC
chr14	39134077	39134477	Peak11933	0.94502	0.00934237	4.64327	2.94858	5.0222	LO_DC
chr14	41262834	41263234	Peak11938	0.771129	0.0119738	3.03328	5.12797	6.36541	LO_DC
chr14	41678165	41678565	Peak11941	1.02345	0.0016043	5.67216	4.56416	6.0968	LO_DC
chr14	41705557	41705957	Peak11942	0.92363	0.00484567	6.36143	4.25182	5.74258	LO_DC
chr14	46065087	46065487	Peak11979	1.00025	2.92632e-06	7.38379	6.48401	7.6602	LO_DC
chr14	48632195	48632595	Peak12031	0.705173	0.0334728	3.58783	3.12781	4.92243	LO_DC
chr14	53659312	53659712	Peak12112	0.855031	0.0106738	5.78989	3.94895	5.49293	LO_DC
chr14	55977283	55977683	Peak12187	0.815873	0.00964273	5.36956	4.7145	6.04569	LO_DC
chr14	59985486	59985886	Peak12276	1.04335	0.00400374	4.9921	3.74133	5.57467	LO_DC
chr14	59989303	59989703	Peak12277	0.907114	0.00223251	6.21039	5.25197	6.56779	LO_DC
chr14	64256130	64256530	Peak12365	1.69181	0.000159267	5.40675	2.8471	5.48164	LO_DC
chr14	64257192	64257592	Peak12366	1.37611	0.000528326	4.72601	3.62536	5.74119	LO_DC
chr14	65208618	65209018	Peak12385	0.695622	0.014273	6.20226	5.48521	6.51517	LO_DC
chr14	65213780	65214180	Peak12386	1.24603	2.34682e-05	5.61905	5.43377	6.99271	LO_DC
chr14	73974772	73975172	Peak12541	0.685759	0.0367767	3.702	2.94858	4.79447	LO_DC
chr14	75334086	75334486	Peak12549	0.618586	0.0485198	4.779	4.65659	5.78397	LO_DC
chr14	76481161	76481561	Peak12579	1.18406	0.000214935	5.55887	4.84808	6.45279	LO_DC
chr14	78617133	78617533	Peak12622	0.723698	0.0301172	4.87578	3.29012	4.99876	LO_DC
chr14	8641863	8642263	Peak12679	0.702786	0.0337755	5.05358	3.3638	4.95131	LO_DC
chr14	87486594	87486994	Peak12690	1.03196	0.00479902	4.07538	3.6249	5.5201	LO_DC
chr14	87487909	87488309	Peak12691	0.822387	0.0158001	3.26404	3.90025	5.55756	LO_DC
chr14	87792947	87793347	Peak12699	0.814795	0.0073482	5.51387	5.06275	6.31746	LO_DC
chr14	91858544	91858944	Peak12726	0.757119	0.0244755	4.37076	3.49874	5.17821	LO_DC
chr14	99438468	99438868	Peak12756	0.629446	0.0240728	6.37859	5.61147	6.53627	LO_DC
chr14	99723878	99724278	Peak12768	0.684632	0.0122229	6.16376	5.7425	6.71591	LO_DC
chr15	100304490	100304890	Peak12790	0.636624	0.0374965	5.76676	4.84887	5.92532	LO_DC
chr15	100371391	100371791	Peak12794	1.17236	0.000782061	4.46832	4.39847	6.13073	LO_DC
chr15	10426448	10426848	Peak12951	0.712775	0.0286103	6.03252	3.74091	5.14004	LO_DC
chr15	12353937	12354337	Peak12987	0.623576	0.0355695	6.00961	5.2117	6.20618	LO_DC
chr15	12586031	12586431	Peak12996	1.34292	0.00125103	5.02934	2.95005	5.35093	LO_DC
chr15	30263381	30263781	Peak13098	0.825383	0.0159849	3.19476	2.36325	4.7188	LO_DC
chr15	31284962	31285362	Peak13118	0.925653	0.00955039	4.22558	2.2094	4.79081	LO_DC
chr15	34497733	34498133	Peak13155	0.974675	0.0016043	6.07405	4.79702	6.21984	LO_DC
chr15	38242827	38243227	Peak13242	1.17598	0.00130407	5.46922	3.84828	5.69854	LO_DC
chr15	38389323	38389723	Peak13249	0.716756	0.0245436	5.23114	4.3627	5.65605	LO_DC
chr15	38635923	38636323	Peak13255	0.727545	0.0272128	4.85004	3.89911	5.38946	LO_DC
chr15	41490285	41490685	Peak13287	0.68556	0.0346731	4.96837	4.08521	5.46233	LO_DC
chr15	4973545	4973945	Peak13320	0.623571	0.0425727	4.03146	5.06462	6.1386	LO_DC
chr15	51833981	51834381	Peak13340	0.898858	0.0113124	4.26765	3.2907	5.18658	LO_DC
chr15	51844650	51845050	Peak13341	1.33601	8.16034e-07	6.66587	5.54966	7.12493	LO_DC
chr15	52799381	52799781	Peak13352	0.828892	0.000594804	6.75275	6.16014	7.21389	LO_DC
chr15	53757044	53757444	Peak13362	0.690636	0.0212555	5.96599	5.08655	6.19628	LO_DC
chr15	5845721	5846121	Peak13416	0.765286	0.01309	6.11399	4.74133	5.97714	LO_DC
chr15	58900492	58900892	Peak13425	0.627627	0.039283	5.38851	4.99658	6.05029	LO_DC
chr15	59133771	59134171	Peak13432	1.12859	5.18452e-05	5.50089	5.61054	7.04437	LO_DC
chr15	66893978	66894378	Peak13509	0.666671	0.0409259	3.75257	2.95005	4.77709	LO_DC
chr15	74834295	74834695	Peak13607	0.702417	0.033153	3.85279	2.85104	4.78078	LO_DC
chr15	76790622	76791022	Peak13698	0.827092	0.0171346	5.19449	2.62536	4.66606	LO_DC
chr15	79246904	79247304	Peak13816	0.859041	0.00892488	4.80355	4.36325	5.83134	LO_DC
chr15	79999944	80000344	Peak13865	0.754898	0.0155626	5.32012	4.68429	5.94474	LO_DC
chr15	81530904	81531304	Peak13917	1.23338	0.00121787	6.25712	3.43548	5.41927	LO_DC
chr15	84066059	84066459	Peak14019	0.933055	0.00491655	4.37315	4.46771	5.99473	LO_DC
chr15	84145046	84145446	Peak14022	0.631957	0.048724	5.35375	4.08521	5.34413	LO_DC
chr15	87725342	87725742	Peak14108	1.01647	0.00688165	3.75036	2.74303	5.04611	LO_DC
chr15	94412558	94412958	Peak14211	0.666705	0.0421627	4.07773	3.62582	5.20169	LO_DC
chr15	97163001	97163401	Peak14275	1.0417	0.00251219	4.56097	4.25003	5.92076	LO_DC
chr15	99380308	99380708	Peak14389	0.640075	0.0391023	5.83856	4.62605	5.74824	LO_DC
chr16	10628278	10628678	Peak14437	0.634066	0.0449476	5.01237	4.46694	5.65202	LO_DC
chr16	12960907	12961307	Peak14472	0.678424	0.0329487	4.91971	4.5328	5.78213	LO_DC
chr16	15958752	15959152	Peak14525	0.658072	0.0441686	5.1363	3.50226	5.01511	LO_DC
chr16	20478609	20479009	Peak14649	0.943333	0.00764006	5.21133	3.62766	5.3791	LO_DC
chr16	20860747	20861147	Peak14677	0.893665	0.00234261	5.8039	5.23213	6.5204	LO_DC
chr16	21470021	21470421	Peak14694	0.755586	0.0247143	0	3.04063	5.03688	LO_DC
chr16	23030905	23031305	Peak14746	0.896275	0.0108166	3.85416	3.62766	5.43277	LO_DC
chr16	23098089	23098489	Peak14747	0.682151	0.0272128	5.63261	4.76872	5.93904	LO_DC
chr16	23908432	23908832	Peak14762	0.72553	0.0190131	6.00119	4.68518	5.90361	LO_DC
chr16	31926656	31927056	Peak14875	0.755836	0.0170215	4.55929	4.62628	5.92577	LO_DC
chr16	33979987	33980387	Peak14972	0.975452	0.00362718	4.87645	4.39874	5.972	LO_DC
chr16	34175708	34176108	Peak14979	0.743452	0.0245422	4.99085	3.89987	5.38815	LO_DC
chr16	38168051	38168451	Peak15073	0.794383	0.0202976	5.19476	2.74133	4.70049	LO_DC
chr16	38445109	38445509	Peak15085	0.798607	0.0165956	4.59112	4.08454	5.60717	LO_DC
chr16	40621193	40621593	Peak15114	0.653336	0.0447962	5.03176	2.84867	4.57041	LO_DC
chr16	43926522	43926922	Peak15150	0.790805	0.0149923	5.87561	4.08622	5.49232	LO_DC
chr16	48309034	48309434	Peak15219	0.693736	0.0301172	5.46855	4.29012	5.58737	LO_DC
chr16	59545191	59545591	Peak15334	0.619628	0.0464524	5.85159	4.56584	5.66752	LO_DC
chr16	64873686	64874086	Peak15358	0.717137	0.0190131	5.57155	5.08655	6.26223	LO_DC
chr16	64875643	64876043	Peak15359	0.865432	0.00987874	5.31938	3.99534	5.53925	LO_DC
chr16	71434992	71435392	Peak15377	0.640306	0.049257	5.40464	3.62582	5.06742	LO_DC
chr16	72693709	72694109	Peak15382	0.924873	0.0094148	5.58989	3.28896	5.15226	LO_DC
chr16	7425795	7426195	Peak15391	1.50734	3.90941e-05	6.03252	4.12943	6.11113	LO_DC
chr16	78456512	78456912	Peak15421	0.784708	0.0212555	5.77882	4.79886	6.63182	LO_DC
chr16	78846285	78846685	Peak15426	0.660951	0.0263409	4.85244	5.23152	6.28605	LO_DC
chr16	81175741	81176141	Peak15431	0.685992	0.0369662	4.52974	2.84867	4.67005	LO_DC
chr16	84779317	84779717	Peak15450	1.01627	0.000477947	6.56773	5.15056	6.52531	LO_DC
chr16	84825220	84825620	Peak15452	1.02281	0.00248161	6.04347	4.17171	5.78163	LO_DC
chr16	8555480	8555880	Peak15463	0.844879	0.00850059	4.49958	4.62651	6.01908	LO_DC
chr16	90416891	90417291	Peak15544	0.951659	0.00849377	5.17472	3.2094	5.13506	LO_DC
chr16	91200089	91200489	Peak15576	0.764856	0.0208111	2.5336	4.28983	5.78997	LO_DC
chr16	9149822	9150222	Peak15588	0.683177	0.0258266	6.38721	4.59556	5.73879	LO_DC
chr16	92468738	92469138	Peak15624	1.02143	0.000521463	6.11513	5.15024	6.5436	LO_DC
chr16	93795117	93795517	Peak15650	0.866751	0.002435	5.01114	5.49987	6.72978	LO_DC
chr17	10343076	10343476	Peak15765	1.61934	0.000372011	3.80284	2.62352	5.48451	LO_DC
chr17	10625456	10625856	Peak15770	0.947819	0.00410203	5.76402	4.3263	5.84279	LO_DC
chr17	11545928	11546328	Peak15780	0.785596	0.0138049	5.13659	4.53354	5.87674	LO_DC
chr17	13192146	13192546	Peak15809	0.860702	0.0122586	4.8039	3.74303	5.42399	LO_DC
chr17	16907451	16907851	Peak15862	1.48477	0.000216764	4.98929	3.62582	5.7913	LO_DC
chr17	17333016	17333416	Peak15870	2.33852	6.54384e-09	5.15411	3.68672	6.5842	LO_DC
chr17	17749348	17749748	Peak15887	1.26968	0.00118269	4.77936	3.50075	5.57622	LO_DC
chr17	25893750	25894150	Peak16065	0.644524	0.039663	5.9795	4.43416	5.59311	LO_DC
chr17	26721396	26721796	Peak16106	0.704384	0.0184521	5.24808	5.10749	6.22355	LO_DC
chr17	27366630	27367030	Peak16141	0.715299	0.0249117	5.60312	4.32545	5.6252	LO_DC
chr17	27377791	27378191	Peak16143	0.738382	0.0187047	4.40183	4.84868	6.11553	LO_DC
chr17	27762741	27763141	Peak16157	0.835854	0.0112856	5.55824	4.1695	5.64246	LO_DC
chr17	28730794	28731194	Peak16227	0.709884	0.0147369	5.64624	5.36366	6.4453	LO_DC
chr17	29161854	29162254	Peak16253	0.684615	0.0247768	5.40417	4.92349	6.06095	LO_DC
chr17	29350321	29350721	Peak16269	0.729222	0.0290601	3.99303	3.29012	5.07564	LO_DC
chr17	30017160	30017560	Peak16313	0.85814	0.00334308	5.33605	5.30804	6.55168	LO_DC
chr17	32035921	32036321	Peak16381	0.631092	0.0494814	3.47011	4.49899	5.76833	LO_DC
chr17	33736838	33737238	Peak16446	1.11389	2.34682e-05	6.44386	5.76955	7.14935	LO_DC
chr17	37134043	37134443	Peak16637	0.618017	0.0237331	6.67274	5.65614	6.54577	LO_DC
chr17	43172954	43173354	Peak16674	0.623792	0.0374521	6.87426	4.87373	5.89342	LO_DC
chr17	46949433	46949833	Peak16787	0.667523	0.0131044	6.01053	5.91239	6.84983	LO_DC
chr17	50164440	50164840	Peak16902	1.62429	9.60423e-05	4.55845	3.56416	5.88191	LO_DC
chr17	55179438	55179838	Peak16965	1.4678	0.000424199	4.37411	3.43443	5.72648	LO_DC
chr17	5977942	5978342	Peak17094	0.846933	0.00489544	5.21347	5.14992	6.42485	LO_DC
chr17	65112005	65112405	Peak17137	1.24431	0.0017768	3.99054	3.2094	5.44784	LO_DC
chr17	65570957	65571357	Peak17142	0.982833	0.00605173	5.69838	3.50175	5.29734	LO_DC
chr17	66051511	66051911	Peak17148	1.23328	6.16959e-05	5.55992	5.12992	6.72596	LO_DC
chr17	68043202	68043602	Peak17197	0.634618	0.0494814	5.11656	3.94858	5.2675	LO_DC
chr17	68197077	68197477	Peak17200	0.650204	0.0464524	3.33704	3.43443	5.04917	LO_DC
chr17	68219371	68219771	Peak17201	0.662375	0.0402686	5.07243	4.08555	5.41214	LO_DC
chr17	6955560	6955960	Peak17211	0.646338	0.0441338	4.61662	4.21186	5.49682	LO_DC
chr17	7096581	7096981	Peak17229	0.628713	0.0431414	5.54565	4.62559	5.73879	LO_DC
chr17	71177888	71178288	Peak17244	0.832542	0.00168844	6.49991	5.75635	6.88019	LO_DC
chr17	72194008	72194408	Peak17271	0.697371	0.0336845	4.98679	3.90063	5.36082	LO_DC
chr17	7451579	7451979	Peak17298	0.819537	0.0102991	4.07361	4.71472	6.08531	LO_DC
chr17	80841056	80841456	Peak17383	0.68598	0.0376594	4.40417	3.36214	5.01197	LO_DC
chr17	81200690	81201090	Peak17401	1.08508	0.00255172	5.01084	3.84867	5.65659	LO_DC
chr17	82672235	82672635	Peak17417	0.96812	0.00384847	5.4366	4.3638	5.92954	LO_DC
chr17	83876376	83876776	Peak17434	0.613586	0.0491716	5.13546	4.71277	5.81752	LO_DC
chr17	84750640	84751040	Peak17480	1.0921	0.00149925	6.20293	4.04063	5.72264	LO_DC
chr17	85561923	85562323	Peak17507	1.33058	0.0001624	5.53189	4.50075	6.32885	LO_DC
chr17	87870986	87871386	Peak17573	0.668001	0.0187544	5.94489	5.49987	6.49539	LO_DC
chr17	88639826	88640226	Peak17606	0.681164	0.0378267	4.98773	2.74133	4.56614	LO_DC
chr17	88868031	88868431	Peak17621	1.89424	1.27871e-07	5.0951	4.43337	6.68383	LO_DC
chr17	88910453	88910853	Peak17624	0.615457	0.0112856	6.86509	6.48477	7.28557	LO_DC
chr17	93007316	93007716	Peak17664	0.647732	0.0433795	5.22956	4.12943	5.4026	LO_DC
chr17	93833927	93834327	Peak17670	0.739841	0.0263237	4.33998	2.6272	4.66606	LO_DC
chr17	93881667	93882067	Peak17672	1.38398	8.82648e-06	6.49903	4.92424	6.62977	LO_DC
chr17	95050826	95051226	Peak17675	0.61101	0.0494434	6.26546	4.71364	5.80949	LO_DC
chr18	12180743	12181143	Peak17712	0.691679	0.0359842	4.33605	3.5656	5.12638	LO_DC
chr18	12544176	12544576	Peak17727	1.58401	4.90066e-05	4.5306	3.99569	6.12783	LO_DC
chr18	19221927	19222327	Peak17775	0.735514	0.0142177	5.35351	5.19177	6.3516	LO_DC
chr18	20927222	20927622	Peak17790	1.26038	0.00141401	4.50002	3.3638	5.49682	LO_DC
chr18	21242574	21242974	Peak17802	0.60955	0.0499232	4.2314	2.21186	4.27537	LO_DC
chr18	32292292	32292692	Peak17906	0.69089	0.0349487	5.17417	3.74091	5.20317	LO_DC
chr18	33995607	33996007	Peak17928	1.36871	6.16959e-05	5.0739	4.62697	6.42925	LO_DC
chr18	3593535	3593935	Peak18014	0.68128	0.0388039	3.19259	3.36325	5.03996	LO_DC
chr18	36412989	36413389	Peak18042	0.627329	0.0393562	5.61723	4.94766	6.00581	LO_DC
chr18	36575221	36575621	Peak18049	0.996058	0.000755972	6.41299	5.10749	6.48842	LO_DC
chr18	36609572	36609972	Peak18050	0.741436	0.0270556	4.58907	3.12716	4.89977	LO_DC
chr18	39067021	39067421	Peak18164	0.643012	0.0377485	4.40745	5.08672	6.20829	LO_DC
chr18	43550385	43550785	Peak18209	0.699302	0.0309369	4.47101	4.25182	5.61697	LO_DC
chr18	44525666	44526066	Peak18216	0.638983	0.0494213	4.3005	3.12846	4.79447	LO_DC
chr18	44538416	44538816	Peak18218	0.824212	0.0155626	4.22876	3.79723	5.45541	LO_DC
chr18	47074042	47074442	Peak18255	0.767892	0.020854	5.61662	3.68628	5.2134	LO_DC
chr18	5011595	5011995	Peak18277	0.62977	0.024312	5.42036	5.72734	6.65431	LO_DC
chr18	53424989	53425389	Peak18306	0.788356	0.00991124	5.70048	4.87469	6.12533	LO_DC
chr18	54878694	54879094	Peak18318	1.1774	0.000629666	4.94521	4.4339	6.1386	LO_DC
chr18	56904589	56904989	Peak18346	0.636055	0.0420172	6.28251	4.5656	5.70527	LO_DC
chr18	65752769	65753169	Peak18506	0.650452	0.0360346	5.73786	4.74049	5.87846	LO_DC
chr18	66608468	66608868	Peak18536	0.844835	0.0151116	2.94263	3.50125	5.32725	LO_DC
chr18	67427307	67427707	Peak18552	1.53693	6.0869e-05	6.02164	3.84749	5.92243	LO_DC
chr18	67501187	67501587	Peak18561	0.76771	0.00829164	6.301	5.34475	6.48729	LO_DC
chr18	75624538	75624938	Peak18699	0.619196	0.0183938	6.50718	5.98424	6.83772	LO_DC
chr18	76077590	76077990	Peak18720	0.612032	0.0310204	6.34554	5.48483	6.4002	LO_DC
chr18	81373384	81373784	Peak18837	1.64705	9.11239e-05	5.03116	3.43285	5.78947	LO_DC
chr18	81448621	81449021	Peak18840	0.72807	0.00988912	5.57259	5.72691	6.79039	LO_DC
chr18	82682824	82683224	Peak18854	0.851881	0.012028	6.07184	4.9716	6.57737	LO_DC
chr19	18747547	18747947	Peak19057	0.825838	0.00833978	5.52824	4.87527	6.1949	LO_DC
chr19	37995710	37996110	Peak19322	0.737347	0.0180283	5.7247	4.6854	5.92365	LO_DC
chr19	39890447	39890847	Peak19363	0.694742	0.0356938	4.5306	3.21308	4.909	LO_DC
chr19	39964562	39964962	Peak19364	0.725333	0.0117214	5.83925	5.3627	6.44731	LO_DC
chr19	42396790	42397190	Peak19462	1.02485	0.000419624	6.1242	5.25033	6.63386	LO_DC
chr19	42459443	42459843	Peak19465	0.824919	0.00388528	6.05344	5.3263	6.50628	LO_DC
chr19	42944618	42945018	Peak19481	0.815684	0.0181316	3.58865	3.12911	5.04304	LO_DC
chr19	42966023	42966423	Peak19482	0.728146	0.0287815	4.26817	3.50075	5.13217	LO_DC
chr19	42980798	42981198	Peak19483	1.07902	0.00479902	4.1926	2.94637	5.16979	LO_DC
chr19	43573327	43573727	Peak19492	0.983616	0.000744544	6.14439	5.29041	6.64172	LO_DC
chr19	47294045	47294445	Peak19703	0.674387	0.0398455	3.94263	3.8471	5.34164	LO_DC
chr19	55566205	55566605	Peak19871	0.680901	0.0352774	4.96837	4.08622	5.43511	LO_DC
chr19	56740513	56740913	Peak19904	0.810433	0.0109758	3.9465	4.74197	6.09344	LO_DC
chr19	5841466	5841866	Peak19958	1.15497	0.000334023	5.64446	4.796	6.38913	LO_DC
chr19	59043596	59043996	Peak19977	0.66876	0.0290601	5.22876	4.99623	6.12678	LO_DC
chr19	59661802	59662202	Peak19993	0.604953	0.0489204	5.72526	4.90063	5.94309	LO_DC
chr2	101801577	101801977	Peak20166	0.663319	0.0284088	6.27734	4.87314	5.96347	LO_DC
chr2	101821333	101821733	Peak20167	0.982094	0.00759374	4.64763	3.12911	5.14863	LO_DC
chr2	107355650	107356050	Peak20287	0.607844	0.0419594	6.0307	5.16997	6.15963	LO_DC
chr2	112337984	112338384	Peak20323	0.840363	0.00242759	6.36409	5.46784	6.63766	LO_DC
chr2	116068912	116069312	Peak20371	0.791563	0.00987874	6.04272	4.77018	6.02178	LO_DC
chr2	119869973	119870373	Peak20485	0.629213	0.0435451	5.0093	4.82398	5.94967	LO_DC
chr2	127430964	127431364	Peak20637	0.936023	0.00503044	5.96631	4.12911	5.66951	LO_DC
chr2	131058212	131058612	Peak20739	0.749982	0.0214779	4.89774	4.25211	5.676	LO_DC
chr2	142943293	142943693	Peak20877	1.32104	4.69305e-05	5.90926	4.82278	6.5308	LO_DC
chr2	150773768	150774168	Peak21020	0.872502	0.00342898	6.34493	4.99534	6.28155	LO_DC
chr2	154292896	154293296	Peak21160	0.674762	0.0374965	4.43638	4.08521	5.44847	LO_DC
chr2	154724881	154725281	Peak21180	0.667562	0.0409208	3.99179	2.94784	4.7585	LO_DC
chr2	157670530	157670930	Peak21299	0.629674	0.0482638	4.56097	4.43259	5.65458	LO_DC
chr2	15954496	15954896	Peak21350	0.629285	0.0403673	5.30251	4.87373	5.94758	LO_DC
chr2	164602675	164603075	Peak21457	0.662721	0.0425727	3.11628	3.84828	5.32472	LO_DC
chr2	165633649	165634049	Peak21512	0.601644	0.0370597	6.52964	5.28867	6.21029	LO_DC
chr2	167139396	167139796	Peak21597	0.632236	0.0390038	5.26662	4.87411	5.94967	LO_DC
chr2	168586612	168587012	Peak21661	0.612988	0.0464524	5.40441	4.87508	5.93318	LO_DC
chr2	17525316	17525716	Peak21839	0.785282	0.0192881	4.69819	3.79519	5.37976	LO_DC
chr2	17593152	17593552	Peak21840	0.814316	0.0169132	3.58865	3.74218	5.40499	LO_DC
chr2	177135677	177136077	Peak21854	0.713938	0.026714	3.40558	2.21063	4.5195	LO_DC
chr2	17899845	17900245	Peak21888	1.29646	0.000528326	5.49804	3.89911	5.82599	LO_DC
chr2	180462317	180462717	Peak21943	0.732603	0.0124675	6.67226	5.08471	6.20692	LO_DC
chr2	18382145	18382545	Peak22005	0.639587	0.0461804	3.26094	3.04339	4.92577	LO_DC
chr2	20415426	20415826	Peak22042	0.661776	0.0379709	5.09481	4.28896	5.53925	LO_DC
chr2	26541762	26542162	Peak22193	2.01877	1.03886e-05	3.26714	3.12911	5.95577	LO_DC
chr2	31019176	31019576	Peak22391	0.638062	0.0334478	6.53847	4.84808	5.88659	LO_DC
chr2	39324299	39324699	Peak22652	0.774381	0.0209781	5.60169	3.6249	5.22969	LO_DC
chr2	4471372	4471772	Peak22676	1.1619	0.00301246	4.46743	3.0427	5.27919	LO_DC
chr2	4496213	4496613	Peak22680	0.75817	0.0148011	5.93689	4.87392	6.12783	LO_DC
chr2	4875247	4875647	Peak22699	0.786683	0.0208036	3.52845	3.50226	5.25429	LO_DC
chr2	4888919	4889319	Peak22701	0.649866	0.0465744	4.77756	3.36325	4.90654	LO_DC
chr2	51303744	51304144	Peak22730	0.645303	0.0198145	6.35375	5.72873	6.66806	LO_DC
chr2	5141068	5141468	Peak22732	0.637624	0.033153	5.24729	5.19083	6.22219	LO_DC
chr2	5293943	5294343	Peak22759	0.920754	0.00930022	5.35472	3.36214	5.16208	LO_DC
chr2	55075011	55075411	Peak22772	0.815402	0.0161243	4.87544	3.68451	5.30761	LO_DC
chr2	59069484	59069884	Peak22810	0.705111	0.00749625	7.04898	5.75583	6.72264	LO_DC
chr2	59223636	59224036	Peak22815	1.14425	0.000262462	6.3291	4.82378	6.37976	LO_DC
chr2	59233257	59233657	Peak22816	0.698941	0.0344305	3.339	3.89683	5.46108	LO_DC
chr2	60249182	60249582	Peak22857	1.08342	0.00187418	6.07508	3.94674	5.66206	LO_DC
chr2	68136387	68136787	Peak22938	1.15217	0.00168844	5.11513	3.79518	5.67005	LO_DC
chr2	87321322	87321722	Peak23237	0.851071	0.0135231	5.47079	3.49925	5.21066	LO_DC
chr2	87355782	87356182	Peak23238	1.81022	3.40879e-05	4.96583	3.28896	5.82242	LO_DC
chr3	101907726	101908126	Peak23445	1.06625	0.000858662	5.67177	4.76893	6.30026	LO_DC
chr3	101994370	101994770	Peak23450	1.18602	0.000399791	5.33679	4.65637	6.32506	LO_DC
chr3	104031324	104031724	Peak23510	0.638267	0.0242169	6.56679	5.38083	6.33035	LO_DC
chr3	108684095	108684495	Peak23621	0.685512	0.0291524	5.15578	4.56416	5.78397	LO_DC
chr3	116050481	116050881	Peak23659	0.687972	0.0324163	3.94521	4.43232	5.74258	LO_DC
chr3	116057962	116058362	Peak23660	0.665341	0.0425393	4.64605	3.36214	4.93815	LO_DC
chr3	117831212	117831612	Peak23686	1.13142	0.00221703	5.79061	3.56656	5.47771	LO_DC
chr3	121808617	121809017	Peak23737	0.81335	0.0173394	3.89841	3.68672	5.39057	LO_DC
chr3	122151151	122151551	Peak23754	0.710623	0.0324211	3.33507	3.62582	5.24897	LO_DC
chr3	123072024	123072424	Peak23778	0.752038	0.0247877	4.46788	3.62812	5.25235	LO_DC
chr3	127632819	127633219	Peak23811	0.757408	0.017559	3.53017	1.62444	4.38219	LO_DC
chr3	129277982	129278382	Peak23834	0.739456	0.0131826	6.28493	4.8993	6.05181	LO_DC
chr3	133187579	133187979	Peak23895	2.19376	6.63894e-10	6.35339	4.16918	6.74447	LO_DC
chr3	135778735	135779135	Peak23935	0.818825	0.00858958	5.8999	4.65637	5.96228	LO_DC
chr3	144273632	144274032	Peak24027	0.722841	0.00862329	6.55164	5.59661	6.62081	LO_DC
chr3	145314389	145314789	Peak24048	0.654302	0.0237331	5.79025	5.34559	6.34753	LO_DC
chr3	148748171	148748571	Peak24098	0.655772	0.0358974	5.7653	4.46746	5.63284	LO_DC
chr3	14993952	14994352	Peak24106	0.944478	0.00480709	4.67565	4.46823	6.02687	LO_DC
chr3	14999902	15000302	Peak24107	0.650317	0.0156919	6.37847	6.02961	6.95011	LO_DC
chr3	153022925	153023325	Peak24155	0.863783	0.00759707	5.71387	4.501	5.9136	LO_DC
chr3	19923863	19924263	Peak24250	1.04959	0.000147309	6.42816	5.53231	6.89126	LO_DC
chr3	26507448	26507848	Peak24295	0.673627	0.0399386	5.05448	2.84867	4.61959	LO_DC
chr3	26962753	26963153	Peak24299	0.849747	0.0010724	6.18327	5.87411	6.9979	LO_DC
chr3	28923840	28924240	Peak24331	0.81259	0.0182334	5.11542	3.04201	4.87329	LO_DC
chr3	33934685	33935085	Peak24403	1.01384	0.00117447	5.78918	4.87411	6.33446	LO_DC
chr3	34784050	34784450	Peak24420	1.10206	0.00228367	4.92265	3.84986	5.6715	LO_DC
chr3	45050564	45050964	Peak24502	0.99308	0.00709228	5.01115	3.12716	5.14082	LO_DC
chr3	63045086	63045486	Peak24662	1.31219	0.000709189	4.58824	3.74261	5.76782	LO_DC
chr3	63099120	63099520	Peak24664	0.666535	0.00849377	6.67861	6.20138	7.09181	LO_DC
chr3	65281046	65281446	Peak24679	0.784078	0.0213435	4.50046	3.04132	4.95219	LO_DC
chr3	65286816	65287216	Peak24680	0.771842	0.0193144	3.69819	4.21216	5.68482	LO_DC
chr3	7579464	7579864	Peak24754	0.860496	0.00474565	5.76439	4.94895	6.24933	LO_DC
chr3	7667888	7668288	Peak24758	0.872495	0.0105876	3.26508	4.21278	5.84021	LO_DC
chr3	79335873	79336273	Peak24773	1.07542	0.00180196	5.13376	4.21094	5.89296	LO_DC
chr3	79557584	79557984	Peak24780	0.715582	0.0304901	4.55803	3.79437	5.32657	LO_DC
chr3	83683125	83683525	Peak24821	0.772179	0.0218099	3.46294	4.21278	6.33663	LO_DC
chr3	8510914	8511314	Peak24866	0.657917	0.00759374	6.05314	6.42479	7.2877	LO_DC
chr3	86646315	86646715	Peak24892	0.897768	0.00943461	3.80284	3.94747	5.62725	LO_DC
chr3	86688465	86688865	Peak24898	0.822992	0.00833978	5.01114	4.82278	6.12889	LO_DC
chr3	87271082	87271482	Peak24918	0.6939	0.0359028	3.19259	3.43443	5.10084	LO_DC
chr3	90233573	90233973	Peak25115	0.776197	0.0194945	4.72526	3.94784	5.46108	LO_DC
chr3	90834050	90834450	Peak25138	0.880746	0.0113312	4.0363	3.84828	5.58737	LO_DC
chr3	92619890	92620290	Peak25144	0.705951	0.0208508	6.0822	4.89911	6.06357	LO_DC
chr3	94870543	94870943	Peak25191	1.02401	0.00294695	5.03388	4.17013	5.82908	LO_DC
chr3	96093105	96093505	Peak25257	0.712356	0.0284088	4.99116	4.08655	5.47482	LO_DC
chr3	9611205	9611605	Peak25259	0.794873	0.0114548	5.4199	4.74155	6.0568	LO_DC
chr3	96479665	96480065	Peak25290	0.688894	0.0130305	6.29387	5.54893	6.54468	LO_DC
chr4	101061328	101061728	Peak25373	0.769293	0.01441	6.16403	4.43364	5.71828	LO_DC
chr4	101265064	101265464	Peak25379	0.639895	0.0470396	4.53189	4.17171	5.47709	LO_DC
chr4	101556191	101556591	Peak25385	0.790056	0.0111511	5.45334	4.76872	6.04681	LO_DC
chr4	104868667	104869067	Peak25418	0.826304	0.00988652	5.35399	4.46694	5.84808	LO_DC
chr4	10941148	10941548	Peak25557	1.017	0.00203086	5.87544	4.32686	5.89001	LO_DC
chr4	110891911	110892311	Peak25580	1.6483	0.000236541	4.37123	2.85104	5.50739	LO_DC
chr4	116729190	116729590	Peak25679	1.08704	0.00010409	6.26624	5.41656	6.81883	LO_DC
chr4	118674281	118674681	Peak25769	0.802165	0.015329	5.0739	4.04132	5.5201	LO_DC
chr4	121408330	121408730	Peak25850	1.29798	0.00149925	5.2862	2.85104	5.19692	LO_DC
chr4	123367433	123367833	Peak25890	0.645422	0.0412246	4.61662	4.53329	5.72596	LO_DC
chr4	124811449	124811849	Peak25945	0.824354	0.0123885	5.45289	4.08488	5.56244	LO_DC
chr4	124813560	124813960	Peak25946	0.712991	0.0281178	4.587	4.17044	5.55383	LO_DC
chr4	125286736	125287136	Peak25969	0.616934	0.041781	5.77701	5.1304	6.15963	LO_DC
chr4	126801602	126802002	Peak26037	0.877075	0.00759707	5.76475	4.24973	5.7188	LO_DC
chr4	126877416	126877816	Peak26043	0.618309	0.0457424	5.65838	4.68584	5.77339	LO_DC
chr4	129180316	129180716	Peak26113	0.780399	0.00927254	6.35605	5.01956	6.2212	LO_DC
chr4	130174311	130174711	Peak26166	1.17242	0.00133922	5.28341	3.89949	5.74258	LO_DC
chr4	134036783	134037183	Peak26364	0.780325	0.00633163	6.21026	5.41603	6.54764	LO_DC
chr4	137215396	137215796	Peak26504	0.932418	0.00407602	5.35472	4.501	5.97318	LO_DC
chr4	138350249	138350649	Peak26562	0.649868	0.0360459	5.53017	4.71385	5.85206	LO_DC
chr4	138753267	138753667	Peak26577	0.770587	0.0107953	5.82715	4.92443	6.12889	LO_DC
chr4	140195935	140196335	Peak26641	1.50697	4.16907e-08	6.75155	5.4842	7.20449	LO_DC
chr4	141125924	141126324	Peak26713	0.691293	0.00154194	7.28159	6.95936	7.80839	LO_DC
chr4	141128872	141129272	Peak26714	1.05462	0.000525354	6.07361	4.97179	6.42689	LO_DC
chr4	143902589	143902989	Peak26776	0.865158	0.0115948	4.11227	1.85104	4.5501	LO_DC
chr4	146932126	146932526	Peak26847	0.669442	0.0399009	3.64565	2.84789	4.71495	LO_DC
chr4	147359530	147359930	Peak26860	0.62502	0.0347906	6.01253	5.1913	6.18481	LO_DC
chr4	151660313	151660713	Peak27080	0.757164	0.0120234	4.40558	5.17013	6.35802	LO_DC
chr4	15170615	15171015	Peak27086	1.14925	0.000158264	6.69307	4.90025	6.42217	LO_DC
chr4	152933671	152934071	Peak27112	0.911682	0.00507909	4.98867	4.53379	5.99906	LO_DC
chr4	19058069	19058469	Peak27251	1.1483	0.0019008	5.23061	3.74261	5.65311	LO_DC
chr4	19262486	19262886	Peak27253	0.681651	0.0365129	4.33802	2.62812	4.57041	LO_DC
chr4	20899473	20899873	Peak27266	0.646564	0.0409259	4.58783	4.5965	5.79678	LO_DC
chr4	23552694	23553094	Peak27304	0.960933	0.00876598	4.19097	2.94858	5.07263	LO_DC
chr4	32857377	32857777	Peak27350	0.675934	0.0399386	4.50133	3.21186	4.87329	LO_DC
chr4	34681700	34682100	Peak27393	1.6054	0.00023354	4.46788	3.13105	5.62465	LO_DC
chr4	41126893	41127293	Peak27481	0.983059	0.005487	5.35763	3.84789	5.59674	LO_DC
chr4	43419031	43419431	Peak27527	1.15793	6.85235e-05	5.79007	5.30775	6.79787	LO_DC
chr4	48635858	48636258	Peak27678	0.838679	0.0140379	4.64287	3.796	5.44382	LO_DC
chr4	53352087	53352487	Peak27710	0.683315	0.0286103	5.76439	4.53403	5.72787	LO_DC
chr4	53466286	53466686	Peak27713	0.882414	0.00979058	4.92069	3.89911	5.5223	LO_DC
chr4	55490405	55490805	Peak27762	0.903973	0.00262022	5.92233	5.04115	6.36943	LO_DC
chr4	57302890	57303290	Peak27796	0.985202	0.00180196	5.4023	4.89949	6.36697	LO_DC
chr4	57847074	57847474	Peak27814	0.974488	0.00306902	5.81513	4.3263	5.85462	LO_DC
chr4	57854808	57855208	Peak27815	0.607436	0.0263237	5.88764	5.89844	6.77339	LO_DC
chr4	58727081	58727481	Peak27832	0.89617	0.00791034	5.07479	4.08555	5.64449	LO_DC
chr4	59434196	59434596	Peak27851	0.88372	0.00849377	4.7001	4.21094	5.75576	LO_DC
chr4	59886717	59887117	Peak27865	0.705197	0.0159127	5.66034	5.32771	6.40857	LO_DC
chr4	63081545	63081945	Peak27914	0.781968	0.015449	5.42106	4.32686	5.69943	LO_DC
chr4	6520076	6520476	Peak27932	0.738775	0.0187047	6.3195	4.36435	5.62875	LO_DC
chr4	69993645	69994045	Peak27957	0.884427	0.00523203	5.81531	4.5965	5.99038	LO_DC
chr4	83870434	83870834	Peak28047	0.718592	0.0258266	5.60148	4.17108	5.51346	LO_DC
chr4	87118709	87119109	Peak28104	0.61783	0.0435451	6.13433	4.6854	5.74068	LO_DC
chr4	95851381	95851781	Peak28171	0.683291	0.0292883	4.19747	4.94839	6.15499	LO_DC
chr4	98507799	98508199	Peak28207	1.06778	0.00105063	5.354	4.68628	6.24302	LO_DC
chr4	98512374	98512774	Peak28208	0.744958	0.00753204	6.36216	5.58042	6.63914	LO_DC
chr4	98514189	98514589	Peak28209	1.11181	0.00100755	4.80355	4.5005	6.14291	LO_DC
chr4	98532371	98532771	Peak28210	0.642511	0.0487509	4.89941	3.50125	4.97318	LO_DC
chr4	99302669	99303069	Peak28222	0.91355	0.00990538	4.64565	3.3638	5.20792	LO_DC
chr5	10189992	10190392	Peak28276	0.764762	0.0234466	4.67371	2.62628	4.64301	LO_DC
chr5	102276828	102277228	Peak28288	0.863855	0.00575681	5.8275	4.65614	6.00696	LO_DC
chr5	102588608	102589008	Peak28305	1.01921	0.00639063	4.46877	3.04063	5.13139	LO_DC
chr5	104138049	104138449	Peak28326	0.844614	0.00729552	5.21106	4.79519	6.13899	LO_DC
chr5	105283448	105283848	Peak28362	1.34952	0.00129291	4.11342	2.85025	5.33229	LO_DC
chr5	107539014	107539414	Peak28405	1.00245	0.00701178	3.47101	2.21186	4.83312	LO_DC
chr5	108481225	108481625	Peak28424	0.639815	0.0349738	5.43752	4.99534	6.05709	LO_DC
chr5	108505946	108506346	Peak28427	0.637873	0.0263237	6.56721	5.32771	6.30026	LO_DC
chr5	110111997	110112397	Peak28455	0.646263	0.0230075	5.9784	5.48407	6.449	LO_DC
chr5	115595236	115595636	Peak28671	1.21267	0.000917596	5.17581	4.17076	6.02885	LO_DC
chr5	116832695	116833095	Peak28729	1.45404	0.000439105	4.53017	3.43495	5.70632	LO_DC
chr5	117791922	117792322	Peak28756	0.664306	0.0426461	3.02964	3.62536	5.20243	LO_DC
chr5	118959819	118960219	Peak28796	0.721626	0.0225017	5.21079	4.50125	5.77709	LO_DC
chr5	121344876	121345276	Peak28859	0.720964	0.0304518	5.09481	3.21063	4.86983	LO_DC
chr5	12138981	12139381	Peak28861	0.817105	0.0176034	2.64486	3.50175	5.31271	LO_DC
chr5	12209647	12210047	Peak28879	0.983528	0.00176636	5.35278	4.8993	6.35992	LO_DC
chr5	122719192	122719592	Peak28912	1.1516	0.00168844	4.7001	3.89835	5.77204	LO_DC
chr5	122744219	122744619	Peak28915	0.648787	0.038368	3.79999	4.84867	6.00968	LO_DC
chr5	127819246	127819646	Peak29085	0.669678	0.0281117	6.29425	4.65614	5.77524	LO_DC
chr5	139801446	139801846	Peak29412	0.625521	0.0123885	7.0274	6.15032	6.98159	LO_DC
chr5	143544351	143544751	Peak29513	0.609265	0.0256376	6.48393	5.71353	6.58996	LO_DC
chr5	145820256	145820656	Peak29602	0.738216	0.0171346	4.98836	4.84789	6.07373	LO_DC
chr5	17589633	17590033	Peak29793	0.822796	0.01309	5.58886	3.94821	5.44149	LO_DC
chr5	20198031	20198431	Peak29816	0.64499	0.0456927	4.67333	4.17171	5.49518	LO_DC
chr5	23425671	23426071	Peak29873	0.778324	0.0217311	4.75367	3.21124	4.9764	LO_DC
chr5	30137909	30138309	Peak30000	1.37582	3.74505e-05	5.6741	4.74112	6.51627	LO_DC
chr5	34935919	34936319	Peak30143	0.884492	0.00933179	5.22903	3.99676	5.5973	LO_DC
chr5	36060576	36060976	Peak30182	1.41696	1.25067e-06	6.32025	5.27051	6.95555	LO_DC
chr5	36113821	36114221	Peak30186	1.00707	0.0015547	5.61784	4.77059	6.26127	LO_DC
chr5	38945177	38945577	Peak30256	0.651572	0.0427632	5.2674	4.08454	5.3791	LO_DC
chr5	45886836	45887236	Peak30302	0.740189	0.00948594	6.36228	5.39995	6.48812	LO_DC
chr5	53858109	53858509	Peak30345	1.25786	2.05632e-05	6.45961	5.25062	6.82623	LO_DC
chr5	54064747	54065147	Peak30354	1.21031	0.00119608	4.87679	3.89949	5.81621	LO_DC
chr5	61273744	61274144	Peak30383	0.693582	0.0165856	6.53708	5.27065	6.32633	LO_DC
chr5	63957081	63957481	Peak30388	2.01455	1.25067e-06	5.79186	3.50025	6.08531	LO_DC
chr5	64321996	64322396	Peak30394	1.66806	4.3742e-05	5.51496	3.62628	5.89591	LO_DC
chr5	64337452	64337852	Peak30396	0.675075	0.0401678	3.26301	3.56656	5.20792	LO_DC
chr5	64404202	64404602	Peak30400	1.36537	7.34465e-05	3.85141	4.77059	6.58181	LO_DC
chr5	64499090	64499490	Peak30404	0.827755	0.0171346	4.587	2.94637	4.94234	LO_DC
chr5	73610977	73611377	Peak30556	0.940718	0.00723734	4.96647	3.84907	5.55657	LO_DC
chr5	74195670	74196070	Peak30574	0.67444	0.0402235	4.15383	3.21063	4.88955	LO_DC
chr5	74337279	74337679	Peak30579	0.715792	0.0230272	4.80497	4.82358	6.07141	LO_DC
chr5	75601895	75602295	Peak30607	0.997282	0.00753204	1.75697	2.94931	5.20792	LO_DC
chr5	82682699	82683099	Peak30667	1.0501	0.00168844	5.64446	4.40008	6.00064	LO_DC
chr5	90674433	90674833	Peak30719	0.713228	0.0321453	4.94295	3.04063	4.81261	LO_DC
chr6	100220742	100221142	Peak30832	0.701867	0.0269973	5.5755	4.36214	5.63488	LO_DC
chr6	100448689	100449089	Peak30849	0.92097	0.00103141	6.63795	5.34559	6.60064	LO_DC
chr6	107179834	107180234	Peak30882	1.47647	0.000212531	3.90239	3.99356	6.12744	LO_DC
chr6	115682378	115682778	Peak31017	0.812931	0.0132131	4.30301	4.3638	5.80983	LO_DC
chr6	116589883	116590283	Peak31043	0.71045	0.0327032	5.11656	3.12911	4.81524	LO_DC
chr6	118720324	118720724	Peak31079	1.31482	0.00143672	4.50133	2.95078	5.33914	LO_DC
chr6	121476118	121476518	Peak31162	0.660411	0.0435451	4.87341	3.50025	5.02759	LO_DC
chr6	122652648	122653048	Peak31184	0.873831	6.58856e-05	7.07945	6.5333	7.59206	LO_DC
chr6	122720367	122720767	Peak31194	0.868176	0.00396971	5.99933	4.97179	6.26355	LO_DC
chr6	125383704	125384104	Peak31281	1.002	1.23066e-05	7.01625	6.27983	7.48432	LO_DC
chr6	125542045	125542445	Peak31289	0.67599	0.0329268	5.72657	4.4318	5.66806	LO_DC
chr6	127053551	127053951	Peak31310	0.854094	0.0138498	5.35181	3.4318	5.19968	LO_DC
chr6	128416014	128416414	Peak31367	0.607658	0.0397049	5.77846	5.36407	6.3348	LO_DC
chr6	133263910	133264310	Peak31401	0.622754	0.0436063	5.28392	4.79682	5.88144	LO_DC
chr6	133462035	133462435	Peak31402	0.760875	0.0149923	4.64565	4.79702	6.06468	LO_DC
chr6	135264042	135264442	Peak31456	0.694659	0.0357166	3.69819	3.36325	5.04917	LO_DC
chr6	135272781	135273181	Peak31457	1.1975	0.000429087	4.43775	4.62605	6.31931	LO_DC
chr6	136438640	136439040	Peak31479	0.857643	0.0106781	4.64367	4.12878	5.68338	LO_DC
chr6	137617955	137618355	Peak31513	1.41318	7.42424e-07	6.48459	5.39806	7.06509	LO_DC
chr6	139473962	139474362	Peak31526	0.972271	0.00506714	5.35496	3.89835	5.57041	LO_DC
chr6	140145772	140146172	Peak31529	0.826703	0.0147359	2.53531	4.12976	5.7355	LO_DC
chr6	140146640	140147040	Peak31530	0.726268	0.0217321	3.70429	4.87508	6.15357	LO_DC
chr6	140252610	140253010	Peak31535	0.807651	0.0174343	4.11456	3.79437	5.45772	LO_DC
chr6	140484050	140484450	Peak31547	0.657952	0.0443058	2.12312	3.74176	5.32977	LO_DC
chr6	140525629	140526029	Peak31549	0.876477	0.00886618	5.403	4.21186	5.75063	LO_DC
chr6	140557120	140557520	Peak31551	0.723697	0.0230117	5.4206	4.39981	5.70049	LO_DC
chr6	142934891	142935291	Peak31585	1.01887	0.00290095	6.11556	4.03994	5.68732	LO_DC
chr6	143000063	143000463	Peak31589	0.68263	0.0371654	4.19422	3.84868	5.30505	LO_DC
chr6	143909017	143909417	Peak31604	0.863093	0.0139188	4.22823	2.50025	4.75475	LO_DC
chr6	144950010	144950410	Peak31619	0.66894	0.0413671	5.15299	3.56272	5.07182	LO_DC
chr6	148547449	148547849	Peak31683	0.681463	0.0361738	4.72601	3.99534	5.38704	LO_DC
chr6	28967056	28967456	Peak31803	0.665275	0.0210558	4.26611	5.61147	6.62053	LO_DC
chr6	29078247	29078647	Peak31806	0.736494	0.0277907	4.80212	2.94858	4.7918	LO_DC
chr6	29976823	29977223	Peak31844	0.615683	0.0166468	6.68677	6.09615	6.93302	LO_DC
chr6	29978347	29978747	Peak31845	0.963214	0.000636922	5.91025	5.43351	6.73334	LO_DC
chr6	34141395	34141795	Peak31925	0.864356	0.00533239	3.52931	5.04132	6.37854	LO_DC
chr6	37775391	37775791	Peak31995	1.10138	0.00140802	6.10443	4.08488	5.76596	LO_DC
chr6	37787035	37787435	Peak31996	1.74794	9.84997e-05	4.77864	2.94637	5.59464	LO_DC
chr6	37886507	37886907	Peak32000	0.687127	0.017305	5.37171	5.50113	6.54498	LO_DC
chr6	3825793	3826193	Peak32009	0.650406	0.0194711	6.39566	5.58113	6.52861	LO_DC
chr6	44154449	44154849	Peak32080	0.815777	0.0177818	5.54608	3.03994	4.86382	LO_DC
chr6	47138132	47138532	Peak32097	0.966202	0.00520756	5.37028	4.08421	5.75063	LO_DC
chr6	6042534	6042934	Peak32338	0.679615	0.0387437	3.98804	3.74261	5.25163	LO_DC
chr6	60596946	60597346	Peak32341	1.15479	0.000452983	5.92167	4.65727	6.28415	LO_DC
chr6	6090414	6090814	Peak32344	0.643861	0.0482638	4.64486	3.74346	5.20592	LO_DC
chr6	6148064	6148464	Peak32351	0.891096	0.011146	5.15216	3.43285	5.22625	LO_DC
chr6	64974665	64975065	Peak32368	0.751786	0.00570391	6.06378	5.72712	6.77592	LO_DC
chr6	65220661	65221061	Peak32373	0.628764	0.0494814	5.38685	4.17171	5.41214	LO_DC
chr6	71217443	71217843	Peak32447	0.898765	0.00849377	5.42106	3.99605	5.60981	LO_DC
chr6	72572892	72573292	Peak32492	0.639537	0.0499232	3.53103	3.56368	5.11553	LO_DC
chr6	83788004	83788404	Peak32618	0.966454	0.00727466	4.7772	3.50175	5.34413	LO_DC
chr6	88433023	88433423	Peak32754	0.654488	0.0304518	5.92249	4.94858	6.03153	LO_DC
chr6	90458235	90458635	Peak32801	0.676166	0.0272651	5.97761	4.74091	5.88019	LO_DC
chr6	91651180	91651580	Peak32835	0.634015	0.017305	6.98859	5.80885	6.69437	LO_DC
chr6	92445516	92445916	Peak32858	0.952417	0.0024207	6.34493	4.62536	6.05445	LO_DC
chr6	94705428	94705828	Peak32897	0.719766	0.0184048	5.92331	4.92237	6.0964	LO_DC
chr6	94730726	94731126	Peak32899	0.656027	0.0447962	4.46877	3.50226	5.03379	LO_DC
chr6	95059937	95060337	Peak32903	0.70852	0.0327032	5.15466	3.3638	4.95784	LO_DC
chr6	99329031	99329431	Peak32953	0.807927	0.00306902	6.26688	5.67174	6.79014	LO_DC
chr7	107650674	107651074	Peak33120	1.31711	0.000140342	5.43638	4.46746	6.24933	LO_DC
chr7	123430297	123430697	Peak33435	0.789279	0.00608472	6.72648	5.17155	6.32092	LO_DC
chr7	130479750	130480150	Peak33569	1.07909	0.00168844	6.40464	3.99676	5.66552	LO_DC
chr7	131864394	131864794	Peak33578	0.712817	0.0255111	4.77828	4.46823	5.77204	LO_DC
chr7	133535652	133536052	Peak33604	0.820094	0.0169506	5.38851	3.28779	5.02532	LO_DC
chr7	134368746	134369146	Peak33659	0.647245	0.0398679	6.1259	4.32545	5.50516	LO_DC
chr7	13644920	13645320	Peak33755	0.675341	0.0275087	5.19178	5.0653	6.1983	LO_DC
chr7	137743992	137744392	Peak33775	1.14542	0.00145645	5.64347	3.99676	5.79447	LO_DC
chr7	138125900	138126300	Peak33793	0.628892	0.0377243	6.27529	4.82278	5.8703	LO_DC
chr7	13883004	13883404	Peak33807	1.00749	0.0017422	6.47743	4.39847	5.90777	LO_DC
chr7	142330883	142331283	Peak33872	0.794155	0.0155626	5.76493	4.1695	5.62781	LO_DC
chr7	148145261	148145661	Peak33984	0.85981	0.00799402	5.43775	4.56656	5.99197	LO_DC
chr7	152324927	152325327	Peak34136	0.780445	0.00178638	6.73972	5.9837	7.00696	LO_DC
chr7	26218245	26218645	Peak34422	0.657759	0.00849377	6.53028	6.27073	7.14023	LO_DC
chr7	27485133	27485533	Peak34443	0.717448	0.0186687	5.05239	5.01764	6.19074	LO_DC
chr7	28625155	28625555	Peak34502	0.783253	0.0195256	4.702	3.79519	5.37976	LO_DC
chr7	29441427	29441827	Peak34551	0.85791	0.00586422	5.45244	4.79559	6.13034	LO_DC
chr7	29754811	29755211	Peak34571	0.623023	0.04634	4.94618	4.68429	5.81031	LO_DC
chr7	30326274	30326674	Peak34618	0.637498	0.0499899	4.339	3.84749	5.25429	LO_DC
chr7	30901093	30901493	Peak34641	0.809384	0.017473	4.11456	3.62582	5.31016	LO_DC
chr7	3201253	3201653	Peak34718	0.645807	0.0140585	7.08925	5.82218	6.71521	LO_DC
chr7	3221809	3222209	Peak34723	0.607564	0.0346731	6.18464	5.39901	6.32691	LO_DC
chr7	34821064	34821464	Peak34739	0.733157	0.0262317	3.33704	4.04167	5.52831	LO_DC
chr7	49752748	49753148	Peak34940	1.14623	1.76538e-05	6.35436	5.68451	7.09808	LO_DC
chr7	51543105	51543505	Peak35000	0.792871	0.0194856	3.64644	3.68363	5.36508	LO_DC
chr7	52814280	52814680	Peak35102	0.602453	0.0421598	6.00274	5.39779	6.36418	LO_DC
chr7	77384063	77384463	Peak35406	0.813624	0.00881198	6.23976	4.59556	5.89342	LO_DC
chr7	79149167	79149567	Peak35424	0.77967	0.0169132	5.24886	4.28896	5.71213	LO_DC
chr7	80679974	80680374	Peak35444	0.64125	0.0399386	5.55929	4.5644	5.70967	LO_DC
chr7	82919252	82919652	Peak35471	0.787458	0.0209741	3.59112	3.2907	5.12928	LO_DC
chr7	86799411	86799811	Peak35522	0.908085	0.0054239	5.957	4.28925	5.7646	LO_DC
chr7	88208184	88208584	Peak35599	0.604713	0.0449123	6.47576	5.10815	6.11884	LO_DC
chr7	91171963	91172363	Peak35667	0.872604	0.0120234	4.87273	3.6272	5.37244	LO_DC
chr8	108966605	108967005	Peak35897	0.720695	0.0275579	4.23299	4.16918	5.603	LO_DC
chr8	109973040	109973440	Peak35954	0.902032	0.0063192	5.05358	4.46925	5.96228	LO_DC
chr8	110043732	110044132	Peak35956	0.693971	0.0181354	5.96694	5.19192	6.26619	LO_DC
chr8	110134792	110135192	Peak35965	0.83012	0.00786393	5.43638	4.76955	6.08342	LO_DC
chr8	113043644	113044044	Peak36037	0.671741	0.0354851	3.98679	4.53256	5.80175	LO_DC
chr8	114289418	114289818	Peak36099	1.1168	1.50838e-05	6.64525	5.7553	7.12348	LO_DC
chr8	119458895	119459295	Peak36212	1.55483	2.7403e-05	5.54438	4.24943	6.2675	LO_DC
chr8	119893861	119894261	Peak36234	0.734251	0.0132666	5.68543	5.21124	6.3516	LO_DC
chr8	123042608	123043008	Peak36342	1.03485	3.02827e-06	7.61683	6.35396	7.57892	LO_DC
chr8	126535913	126536313	Peak36552	1.14778	0.000692148	5.72807	4.49975	6.16246	LO_DC
chr8	126722119	126722519	Peak36557	0.659105	0.0390402	5.11599	4.32573	5.57622	LO_DC
chr8	126740887	126741287	Peak36558	0.649018	0.0387341	6.76439	4.17013	5.34164	LO_DC
chr8	128217088	128217488	Peak36618	0.716889	0.0117802	5.72769	5.48407	6.54468	LO_DC
chr8	128224340	128224740	Peak36619	0.797763	0.000933767	6.67216	6.30818	7.32788	LO_DC
chr8	12928918	12929318	Peak36659	0.84278	0.00097082	6.13447	6.0519	7.15628	LO_DC
chr8	129384581	129384981	Peak36664	0.794952	0.0055281	6.50653	5.23077	6.38429	LO_DC
chr8	130408453	130408853	Peak36696	1.06333	0.00317257	4.49958	3.84946	5.65806	LO_DC
chr8	14014638	14015038	Peak36754	0.865778	0.00202397	6.58106	5.53391	6.74875	LO_DC
chr8	14967730	14968130	Peak36772	0.686332	0.02617	5.91025	4.65502	5.82062	LO_DC
chr8	15984174	15984574	Peak36786	0.868384	0.000823412	7.03123	5.89978	7.04401	LO_DC
chr8	23596998	23597398	Peak36860	0.781464	0.0085251	4.43546	5.30803	6.49457	LO_DC
chr8	24273646	24274046	Peak36883	1.17533	6.99526e-05	6.99987	4.99569	6.51849	LO_DC
chr8	28344987	28345387	Peak37011	0.930664	0.000197603	6.6107	6.02909	7.20979	LO_DC
chr8	28346691	28347091	Peak37012	1.1589	0.000594804	5.01114	4.53305	6.19591	LO_DC
chr8	28350772	28351172	Peak37013	0.823576	0.000260551	6.64406	6.74939	7.76295	LO_DC
chr8	28769279	28769679	Peak37024	0.626538	0.0316435	5.58865	5.39874	6.37643	LO_DC
chr8	29657690	29658090	Peak37028	0.902039	0.011639	4.96552	2.74388	4.84983	LO_DC
chr8	33155046	33155446	Peak37059	1.75722	2.79734e-06	5.9784	4.12911	6.31271	LO_DC
chr8	34553987	34554387	Peak37080	0.669585	0.0131446	6.56648	5.88801	6.8311	LO_DC
chr8	41735631	41736031	Peak37252	0.844555	0.00132715	5.64486	6.09756	7.22527	LO_DC
chr8	42048403	42048803	Peak37262	0.970189	5.48879e-06	7.212	6.54132	7.68383	LO_DC
chr8	44374729	44375129	Peak37299	1.8122	1.42402e-07	6.72704	4.39847	6.53845	LO_DC
chr8	44385169	44385569	Peak37301	0.727215	0.0154824	6.17307	4.99552	6.15187	LO_DC
chr8	44406130	44406530	Peak37304	0.696142	0.00123485	7.18753	6.97762	7.83013	LO_DC
chr8	4586470	4586870	Peak37319	1.3462	6.78095e-05	5.63121	4.68385	6.46086	LO_DC
chr8	4708373	4708773	Peak37361	1.07268	0.000214935	5.46832	5.3638	6.78397	LO_DC
chr8	47299350	47299750	Peak37368	0.636282	0.0368887	5.98013	4.97341	6.04457	LO_DC
chr8	47531322	47531722	Peak37373	0.750329	0.0169056	6.1632	4.4339	5.70385	LO_DC
chr8	48144302	48144702	Peak37396	2.61259	1.97067e-20	5.88731	4.79662	7.7046	LO_DC
chr8	49260649	49261049	Peak37449	1.23122	0.00149925	4.94295	3.50075	5.56885	LO_DC
chr8	5384808	5385208	Peak37484	0.755837	0.0239532	2.85553	2.74303	4.84983	LO_DC
chr8	54150630	54151030	Peak37485	0.702146	0.034234	4.33753	3.366	5.07864	LO_DC
chr8	58697645	58698045	Peak37511	0.600869	0.0371654	5.40417	5.51724	6.43682	LO_DC
chr8	58722123	58722523	Peak37512	1.0605	0.00115432	5.37028	4.65569	6.21203	LO_DC
chr8	59889268	59889668	Peak37528	0.630667	0.0346731	5.83994	5.04097	6.06054	LO_DC
chr8	59984302	59984702	Peak37533	0.675618	0.0346731	4.80213	4.32686	5.60717	LO_DC
chr8	64896401	64896801	Peak37618	0.601426	0.026688	6.53676	6.16181	7.02143	LO_DC
chr8	66845514	66845914	Peak37630	1.27541	1.76538e-05	5.53039	5.45207	7.04073	LO_DC
chr8	67357964	67358364	Peak37644	0.765458	0.0147359	5.48293	4.65682	5.93859	LO_DC
chr8	67476008	67476408	Peak37650	0.948264	0.00439086	5.69933	4.25003	5.78714	LO_DC
chr8	67718124	67718524	Peak37660	1.11143	0.00174357	5.17197	4.12943	5.90361	LO_DC
chr8	70794925	70795325	Peak37695	0.73394	0.0229741	5.66073	4.17171	5.53329	LO_DC
chr8	71551665	71552065	Peak37713	0.764389	0.00892488	6.68504	5.16966	6.3133	LO_DC
chr8	73162627	73163027	Peak37815	0.686803	0.027711	5.38756	4.5965	5.79264	LO_DC
chr8	82318753	82319153	Peak38082	1.81027	3.08149e-06	6.57363	3.84828	6.12967	LO_DC
chr8	87439203	87439603	Peak38263	0.61313	0.0253177	6.43615	5.78315	6.67005	LO_DC
chr8	88917717	88918117	Peak38316	1.13857	0.000401832	5.75275	4.76851	6.34595	LO_DC
chr8	89411968	89412368	Peak38330	0.867667	4.69305e-05	6.88096	6.81628	7.85772	LO_DC
chr8	89559847	89560247	Peak38335	1.75837	1.84869e-05	3.80213	3.84828	6.17998	LO_DC
chr8	91359932	91360332	Peak38394	0.879764	0.00670749	6.26778	4.28896	5.72839	LO_DC
chr8	91539447	91539847	Peak38401	1.18237	1.03886e-05	6.52194	5.78356	7.23251	LO_DC
chr8	95615160	95615560	Peak38495	0.848238	0.0135789	4.85519	3.74261	5.43511	LO_DC
chr8	98133310	98133710	Peak38583	0.981257	0.00753204	4.339	3.21063	5.20792	LO_DC
chr9	109953673	109954073	Peak38883	0.649618	0.0464524	3.84935	3.79641	5.2806	LO_DC
chr9	114424512	114424912	Peak38996	0.651991	0.0411197	5.40534	4.28983	5.54201	LO_DC
chr9	118516766	118517166	Peak39076	1.1574	0.0016043	4.9014	3.94968	5.81931	LO_DC
chr9	120058520	120058920	Peak39135	0.758257	0.00936589	5.91157	5.25003	6.38517	LO_DC
chr9	17362011	17362411	Peak39291	0.91639	0.00153443	6.8333	5.06394	6.35622	LO_DC
chr9	18538621	18539021	Peak39302	0.828735	0.00990538	4.26662	4.59603	5.98676	LO_DC
chr9	18732412	18732812	Peak39305	0.677122	0.0390038	2.94521	3.89949	5.38219	LO_DC
chr9	18897693	18898093	Peak39306	0.779141	0.0186207	4.75146	3.99534	5.48555	LO_DC
chr9	21119880	21120280	Peak39371	0.680239	0.0314439	5.05358	4.49975	5.7336	LO_DC
chr9	30817624	30818024	Peak39496	1.46353	0.000406471	5.35399	3.43443	5.7049	LO_DC
chr9	30826278	30826678	Peak39497	2.04639	3.30675e-07	6.33777	3.62628	6.16491	LO_DC
chr9	36302105	36302505	Peak39579	0.66783	0.0418092	2.53189	3.43232	5.1126	LO_DC
chr9	3933966	3934366	Peak39634	0.855608	0.0137077	4.85004	3.49874	5.2675	LO_DC
chr9	39784166	39784566	Peak39636	0.864655	0.0101884	5.72563	3.84907	5.40976	LO_DC
chr9	4192757	4193157	Peak39691	1.16888	0.0016043	5.09307	3.79641	5.70243	LO_DC
chr9	4214563	4214963	Peak39698	0.728736	0.0273144	4.64684	3.79682	5.30761	LO_DC
chr9	54703784	54704184	Peak39974	0.780463	0.0145199	5.573	4.4995	5.84327	LO_DC
chr9	55271898	55272298	Peak39996	0.906835	0.01049	3.98804	3.4339	5.29217	LO_DC
chr9	56382642	56383042	Peak40016	0.651065	0.0117214	5.63081	6.21101	7.09754	LO_DC
chr9	57342705	57343105	Peak40054	0.65224	0.0456927	5.13405	3.1304	4.80273	LO_DC
chr9	57888726	57889126	Peak40088	0.957261	0.00798299	4.19259	3.4339	5.31712	LO_DC
chr9	58121790	58122190	Peak40101	0.621536	0.0438478	6.1555	4.62559	5.71161	LO_DC
chr9	6823733	6824133	Peak40367	1.1719	0.0015009	5.61703	3.84749	5.7436	LO_DC
chr9	6832884	6833284	Peak40368	0.665147	0.0361868	4.43683	4.53428	5.76782	LO_DC
chr9	69935088	69935488	Peak40390	0.6415	0.0390028	5.77792	4.56488	5.69267	LO_DC
[truncated: 1,208 more rows]

## Sheet: 2C-GenomeDistribution
Annotation	log2ratio	Sample	cat
[truncated: 44 more rows]

## Sheet: 2E_all_motifs
motif	motif_name	consensus	targetPercent_EO_DC	targetPercent_EO_LC	targetPercent_DO-EC	targetPercent_DO_LC	targetPercent_LO_EC	targetPercent_LO_DC	Samples	LogPvalue	sample	percentMotifs
[truncated: 300 more rows]

[truncated: 1 more sheets: 2F_selected_motifs]
