# Supplementary material for: Comparative functional genomics identifies unique molecular features of EPSCs
Source: Life Sci Alliance. 2022 Aug 12;5(11):e202201608. doi: 10.26508/lsa.202201608 (PMC9378845; doi:10.26508/lsa.202201608)
Supplement: Supplementary file 4 [file LSA-2022-01608_TableS4.xlsx]

## Sheet: 4E-Oct4cKO_WithDox_vs_NoDox
ensembl_gene_id	external_gene_name	logFC	FDR	status
ENSMUSG00000015468	Notch4	-8.98338	1.48148e-08	KO_down
ENSMUSG00000067860	Zic3	-8.96216	1.965e-08	KO_down
ENSMUSG00000055373	Fut9	-8.78265	3.13297e-08	KO_down
ENSMUSG00000000094	Tbx4	-8.35147	1.51513e-07	KO_down
ENSMUSG00000078776	9530053A07Rik	-8.29795	2.01889e-07	KO_down
ENSMUSG00000010064	Slc38a3	-8.06231	4.1501e-07	KO_down
ENSMUSG00000021319	Sfrp4	-7.78568	1.06686e-06	KO_down
ENSMUSG00000057215	Platr28	-7.7665	1.14736e-06	KO_down
ENSMUSG00000024313	Mep1b	-7.76417	1.19088e-06	KO_down
ENSMUSG00000030111	A2m	-7.30759	4.69901e-35	KO_down
ENSMUSG00000022548	Apod	-7.18896	7.67091e-06	KO_down
ENSMUSG00000025056	Nr0b1	-7.18794	6.76969e-07	KO_down
ENSMUSG00000022303	Dcstamp	-7.13149	9.88821e-06	KO_down
ENSMUSG00000020717	Pecam1	-7.00491	2.5385e-140	KO_down
ENSMUSG00000030669	Calca	-6.98134	1.40958e-05	KO_down
ENSMUSG00000027996	Sfrp2	-6.97656	1.44762e-06	KO_down
ENSMUSG00000092177	NA	-6.95229	1.51841e-05	KO_down
ENSMUSG00000066652	Lefty2	-6.93689	1.78889e-05	KO_down
ENSMUSG00000085671	NA	-6.92003	1.68104e-05	KO_down
ENSMUSG00000074895	Eif4e1b	-6.88871	1.85043e-05	KO_down
ENSMUSG00000086096	Gm12688	-6.85798	2.05563e-05	KO_down
ENSMUSG00000028602	Tnfrsf8	-6.72801	2.95316e-05	KO_down
ENSMUSG00000022658	Tagln3	-6.66088	3.51547e-05	KO_down
ENSMUSG00000031073	Fgf15	-6.5877	4.29796e-05	KO_down
ENSMUSG00000027322	Siglec1	-6.55229	4.74845e-05	KO_down
ENSMUSG00000024427	Spry4	-6.55001	4.79555e-05	KO_down
ENSMUSG00000021255	Esrrb	-6.40892	1.16416e-300	KO_down
ENSMUSG00000043681	Fam25c	-6.37601	2.6518e-13	KO_down
ENSMUSG00000044117	Bmerb1	-6.26425	3.50797e-09	KO_down
ENSMUSG00000023192	Grm2	-6.20064	0.000132175	KO_down
ENSMUSG00000027077	Smtnl1	-6.14311	7.50481e-09	KO_down
ENSMUSG00000021508	Cxcl14	-6.09402	2.78536e-05	KO_down
ENSMUSG00000032494	Tdgf1	-6.08142	0	KO_down
ENSMUSG00000093516	Gm19553	-6.07711	0.000167336	KO_down
ENSMUSG00000050700	Emilin3	-6.02301	0.000199483	KO_down
ENSMUSG00000032517	Mobp	-5.97223	4.1886e-05	KO_down
ENSMUSG00000028148	Them5	-5.91527	0.000254278	KO_down
ENSMUSG00000042268	Slc26a9	-5.91527	0.000254278	KO_down
ENSMUSG00000034641	Cd300ld	-5.91396	0.000251936	KO_down
ENSMUSG00000087474	Gm12100	-5.85717	0.000294068	KO_down
ENSMUSG00000084208	Gm12792	-5.85251	0.000296399	KO_down
ENSMUSG00000086967	NA	-5.84483	5.94039e-05	KO_down
ENSMUSG00000040950	Mgl2	-5.84251	0.000314449	KO_down
ENSMUSG00000061702	Tmem91	-5.80329	0.000324573	KO_down
ENSMUSG00000013367	Iglon5	-5.80257	0.000329043	KO_down
ENSMUSG00000048450	Msx1	-5.78908	0.000344879	KO_down
ENSMUSG00000053062	Jam2	-5.77564	9.93654e-10	KO_down
ENSMUSG00000034701	Neurod1	-5.7379	0.000377811	KO_down
ENSMUSG00000021322	Aoah	-5.72258	0.000392081	KO_down
ENSMUSG00000014773	Dll1	-5.67914	3.14566e-16	KO_down
ENSMUSG00000092627	D130058E05Rik	-5.66991	0.000437468	KO_down
ENSMUSG00000045573	Penk	-5.60338	0.000117379	KO_down
ENSMUSG00000025229	Pitx3	-5.60192	0.000535673	KO_down
ENSMUSG00000004038	Gstm3	-5.5903	2.0781e-07	KO_down
ENSMUSG00000025215	Tlx1	-5.53025	0.000635556	KO_down
ENSMUSG00000044217	Aqp5	-5.53025	0.000635556	KO_down
ENSMUSG00000048703	Speer4b	-5.52266	0.000659966	KO_down
ENSMUSG00000032495	Lrrc2	-5.47793	5.76527e-28	KO_down
ENSMUSG00000030310	Slc6a1	-5.46055	0.000716959	KO_down
ENSMUSG00000015314	Slamf6	-5.46022	0.00073086	KO_down
ENSMUSG00000055003	Lrtm2	-5.39933	0.000797952	KO_down
ENSMUSG00000029026	Trp73	-5.38285	6.54613e-07	KO_down
ENSMUSG00000092275	Gm20465	-5.37122	0.000909218	KO_down
ENSMUSG00000050917	Fgf4	-5.3135	0	KO_down
ENSMUSG00000079735	NA	-5.31081	0.000976398	KO_down
ENSMUSG00000009216	Fam163b	-5.25595	0.00118225	KO_down
ENSMUSG00000029913	Prdm5	-5.25301	1.18501e-27	KO_down
ENSMUSG00000024406	Pou5f1	-5.2231	0	KO_down
ENSMUSG00000045179	Sox3	-5.22065	0.000341252	KO_down
ENSMUSG00000055805	Fmnl1	-5.18952	1.15552e-08	KO_down
ENSMUSG00000006445	Epha2	-5.18621	3.0041e-91	KO_down
ENSMUSG00000032224	Fam81a	-5.15133	1.65953e-120	KO_down
ENSMUSG00000079173	Zan	-5.13902	1.52731e-08	KO_down
ENSMUSG00000029522	Pla2g1b	-5.13529	0.000424547	KO_down
ENSMUSG00000027500	Stmn2	-5.10485	4.52827e-89	KO_down
ENSMUSG00000029205	Chrna9	-5.10404	0.00154799	KO_down
ENSMUSG00000009487	Otog	-5.10385	3.02081e-06	KO_down
ENSMUSG00000043857	Mgat5b	-5.0852	3.27113e-21	KO_down
ENSMUSG00000059741	Myl3	-5.05657	0.00154873	KO_down
ENSMUSG00000033578	Tmem35a	-5.03815	3.81651e-06	KO_down
ENSMUSG00000025491	Ifitm1	-5.03529	2.46465e-24	KO_down
ENSMUSG00000070348	Ccnd1	-4.99792	1.67867e-36	KO_down
ENSMUSG00000055333	Fat2	-4.97175	7.75011e-06	KO_down
ENSMUSG00000043740	B430306N03Rik	-4.95587	0.00210302	KO_down
ENSMUSG00000042751	Nmnat2	-4.95005	8.40359e-38	KO_down
ENSMUSG00000033837	Foxh1	-4.9395	1.97971e-45	KO_down
ENSMUSG00000087424	5730405O15Rik	-4.92627	0.000720646	KO_down
ENSMUSG00000040650	Cyp2b23	-4.89537	1.27816e-11	KO_down
ENSMUSG00000031026	Trim66	-4.88895	4.23833e-21	KO_down
ENSMUSG00000040972	Igsf21	-4.88757	1.00911e-07	KO_down
ENSMUSG00000040258	Nxph4	-4.87918	1.96509e-13	KO_down
ENSMUSG00000006649	Nphs1	-4.86531	0.000831384	KO_down
ENSMUSG00000030428	Ttyh1	-4.86331	2.79869e-11	KO_down
ENSMUSG00000070388	Fbxo39	-4.84783	0.00223003	KO_down
ENSMUSG00000038227	Hoxa9	-4.83723	0.000882286	KO_down
ENSMUSG00000083534	H2-M6-ps	-4.82111	2.07414e-09	KO_down
ENSMUSG00000004341	Gpx6	-4.81212	0.00094427	KO_down
ENSMUSG00000064308	2410137M14Rik	-4.80584	1.24897e-05	KO_down
ENSMUSG00000003476	Crhr2	-4.77667	0.00101441	KO_down
ENSMUSG00000017417	Plxdc1	-4.74123	1.33694e-12	KO_down
ENSMUSG00000042448	Hoxd1	-4.73851	0.00266375	KO_down
ENSMUSG00000032591	Mst1	-4.72888	6.6391e-16	KO_down
ENSMUSG00000071424	Grid2	-4.6822	4.05534e-07	KO_down
ENSMUSG00000030117	Gdf3	-4.64321	1.29447e-21	KO_down
ENSMUSG00000087283	Gm13580	-4.6346	1.38076e-08	KO_down
ENSMUSG00000042002	Foxn4	-4.61631	0.00321384	KO_down
ENSMUSG00000001444	Tbx21	-4.61501	0.00321827	KO_down
ENSMUSG00000034570	Inpp5j	-4.61501	0.00321827	KO_down
ENSMUSG00000026589	Sec16b	-4.60997	0.0032514	KO_down
ENSMUSG00000024565	Sall3	-4.60246	3.06525e-05	KO_down
ENSMUSG00000021130	Galnt16	-4.5827	4.4899e-10	KO_down
ENSMUSG00000022754	Tmem45a	-4.58239	3.34391e-05	KO_down
ENSMUSG00000030607	Acan	-4.57256	1.86684e-11	KO_down
ENSMUSG00000004562	Arhgef40	-4.56811	1.25141e-17	KO_down
ENSMUSG00000061718	Ppp1r1b	-4.54715	4.11789e-05	KO_down
ENSMUSG00000074637	Sox2	-4.51028	0	KO_down
ENSMUSG00000024459	H2-M5	-4.48585	1.22652e-16	KO_down
ENSMUSG00000050157	Gm867	-4.48192	0.00391262	KO_down
ENSMUSG00000017724	Etv4	-4.46819	2.41776e-13	KO_down
ENSMUSG00000051457	Spn	-4.4671	0.0040566	KO_down
ENSMUSG00000040280	Ndufa4l2	-4.46647	1.13201e-54	KO_down
ENSMUSG00000004558	Ndrg2	-4.45853	1.41484e-55	KO_down
ENSMUSG00000020037	Rfx4	-4.45289	0.00418725	KO_down
ENSMUSG00000006218	Fam131c	-4.43294	9.94045e-27	KO_down
ENSMUSG00000064263	Platr26	-4.42722	3.98255e-12	KO_down
ENSMUSG00000023017	Asic1	-4.41471	1.48511e-13	KO_down
ENSMUSG00000027249	F2	-4.40899	7.04864e-05	KO_down
ENSMUSG00000028782	Adgrb2	-4.4069	2.1614e-42	KO_down
ENSMUSG00000019997	Ccn2	-4.39216	1.328e-106	KO_down
ENSMUSG00000075122	Cd80	-4.38525	0.00250519	KO_down
ENSMUSG00000040907	Atp1a3	-4.38388	3.98356e-59	KO_down
ENSMUSG00000051323	Pcdh19	-4.37964	9.16297e-05	KO_down
ENSMUSG00000030606	Hapln3	-4.37884	4.78766e-09	KO_down
ENSMUSG00000038295	Atg9b	-4.37656	2.92168e-06	KO_down
ENSMUSG00000032936	Camkv	-4.33221	5.74856e-13	KO_down
ENSMUSG00000048562	Sp8	-4.33064	0.00482429	KO_down
ENSMUSG00000086563	Platr15	-4.32314	7.79991e-09	KO_down
ENSMUSG00000020811	Wscd1	-4.31869	0.000108122	KO_down
ENSMUSG00000022304	Dpys	-4.31081	4.58416e-14	KO_down
ENSMUSG00000037855	Zfp365	-4.29709	4.16315e-38	KO_down
ENSMUSG00000087275	NA	-4.27325	1.19735e-08	KO_down
ENSMUSG00000092622	Khdc3	-4.25687	1.79444e-144	KO_down
ENSMUSG00000029122	Evc	-4.25077	1.65402e-08	KO_down
ENSMUSG00000040543	Pitpnm3	-4.21997	0.000150173	KO_down
ENSMUSG00000004151	Etv1	-4.2064	3.67614e-12	KO_down
ENSMUSG00000021185	Dglucy	-4.20017	4.31926e-32	KO_down
ENSMUSG00000085490	NA	-4.19948	0.00375879	KO_down
ENSMUSG00000024039	Cbs	-4.18557	5.87577e-53	KO_down
ENSMUSG00000053654	Krt42	-4.17682	0.00374282	KO_down
ENSMUSG00000017453	Pipox	-4.17551	1.15416e-38	KO_down
ENSMUSG00000041359	Tcl1	-4.17396	2.26694e-46	KO_down
ENSMUSG00000035686	Thrsp	-4.16102	2.37229e-10	KO_down
ENSMUSG00000037579	Kcnh3	-4.15787	0.000194948	KO_down
ENSMUSG00000030798	Cd37	-4.14831	2.84054e-09	KO_down
ENSMUSG00000079499	6530402F18Rik	-4.14728	0.00611984	KO_down
ENSMUSG00000038132	Rbm24	-4.13832	9.38029e-07	KO_down
ENSMUSG00000011154	Cfap161	-4.13135	0.00408504	KO_down
ENSMUSG00000054379	2410024N13Rik	-4.13135	0.00408504	KO_down
ENSMUSG00000024209	Acsbg3	-4.13025	9.76458e-27	KO_down
ENSMUSG00000024793	Tnfrsf25	-4.12685	0.00633032	KO_down
ENSMUSG00000040770	Il25	-4.11206	0.00642787	KO_down
ENSMUSG00000022483	Col2a1	-4.10514	5.83298e-09	KO_down
ENSMUSG00000070837	Aurkc	-4.08931	1.20954e-59	KO_down
ENSMUSG00000000938	Hoxa10	-4.08643	0.00460821	KO_down
ENSMUSG00000036185	Sapcd1	-4.08049	0.000272103	KO_down
ENSMUSG00000020017	Hal	-4.04586	4.46032e-11	KO_down
ENSMUSG00000031958	Ldhd	-4.04366	0.000299216	KO_down
ENSMUSG00000035799	Twist1	-4.03647	1.29187e-07	KO_down
ENSMUSG00000060180	Myh13	-4.03104	5.67453e-24	KO_down
ENSMUSG00000002190	Clgn	-4.03079	1.81583e-51	KO_down
ENSMUSG00000006386	Tek	-4.02571	1.30026e-08	KO_down
ENSMUSG00000027075	Slc43a1	-4.01918	2.18989e-08	KO_down
ENSMUSG00000013766	Ly6g6e	-4.00278	5.23137e-40	KO_down
ENSMUSG00000044352	Sowaha	-3.98381	0.000411894	KO_down
ENSMUSG00000015579	Nkx2-5	-3.98277	0.00727225	KO_down
ENSMUSG00000022603	Mroh4	-3.98277	0.00727225	KO_down
ENSMUSG00000026787	Gad2	-3.98277	0.00727225	KO_down
ENSMUSG00000031530	Dusp4	-3.98208	1.59533e-08	KO_down
ENSMUSG00000065968	Ifitm7	-3.95326	0.0075443	KO_down
ENSMUSG00000004892	Bcan	-3.95177	4.41315e-07	KO_down
ENSMUSG00000028626	Col9a2	-3.91801	3.90921e-40	KO_down
ENSMUSG00000072945	Ripply1	-3.91551	0.00600334	KO_down
ENSMUSG00000036466	Megf11	-3.90364	2.30545e-18	KO_down
ENSMUSG00000002500	Rpl3l	-3.88064	4.55196e-06	KO_down
ENSMUSG00000047026	Acsm4	-3.86918	0.00844042	KO_down
ENSMUSG00000041482	Piezo2	-3.84973	0.00678699	KO_down
ENSMUSG00000041831	Sytl3	-3.84705	0.00693789	KO_down
ENSMUSG00000028909	Ptpru	-3.84108	1.89544e-20	KO_down
ENSMUSG00000040601	Nlrp4a	-3.83974	1.15291e-13	KO_down
ENSMUSG00000091712	Sec14l5	-3.83821	1.17113e-08	KO_down
ENSMUSG00000090535	Gm8540	-3.8379	3.36399e-28	KO_down
ENSMUSG00000045672	Col27a1	-3.83753	6.41253e-06	KO_down
ENSMUSG00000080354	NA	-3.82993	6.58158e-05	KO_down
ENSMUSG00000031139	Mcf2	-3.81802	6.55177e-25	KO_down
ENSMUSG00000065952	Rps23rg1	-3.8166	9.40017e-09	KO_down
ENSMUSG00000042414	Prdm14	-3.80404	7.18774e-63	KO_down
ENSMUSG00000024347	Psd2	-3.80131	8.72177e-07	KO_down
ENSMUSG00000019326	Aoc3	-3.77246	5.24035e-12	KO_down
ENSMUSG00000033726	Emx1	-3.75582	0.00908539	KO_down
ENSMUSG00000083935	Gm12294	-3.75582	0.00908539	KO_down
ENSMUSG00000035486	Plk5	-3.7548	2.98687e-09	KO_down
ENSMUSG00000048904	Neurog1	-3.74889	0.00917354	KO_down
ENSMUSG00000031163	Glod5	-3.74707	5.25977e-10	KO_down
ENSMUSG00000054160	Nkx2-4	-3.73908	0.00925201	KO_down
ENSMUSG00000024059	Clip4	-3.73257	1.33527e-19	KO_down
ENSMUSG00000001281	Itgb7	-3.72282	2.37836e-28	KO_down
ENSMUSG00000032118	Fez1	-3.71485	1.32478e-11	KO_down
ENSMUSG00000039713	Plekhg5	-3.70641	1.21231e-155	KO_down
ENSMUSG00000039013	Siglecf	-3.70381	1.65852e-05	KO_down
ENSMUSG00000040249	Lrp1	-3.69663	0	KO_down
ENSMUSG00000021095	Gsc	-3.68828	8.6744e-10	KO_down
ENSMUSG00000070003	Ssbp4	-3.68699	2.06882e-165	KO_down
ENSMUSG00000028492	Saxo1	-3.67327	0.00991546	KO_down
ENSMUSG00000022469	Rapgef3	-3.66833	6.37586e-08	KO_down
ENSMUSG00000030742	Lat	-3.66642	1.86282e-05	KO_down
ENSMUSG00000027858	Tspan2	-3.65415	3.10676e-28	KO_down
ENSMUSG00000032359	Ctsh	-3.64865	2.4576e-05	KO_down
ENSMUSG00000032346	Ooep	-3.64702	1.76893e-35	KO_down
ENSMUSG00000032363	Adamts7	-3.64508	7.94839e-29	KO_down
ENSMUSG00000061322	Dnai1	-3.63848	2.72566e-20	KO_down
ENSMUSG00000027351	Spred1	-3.62903	3.44742e-32	KO_down
ENSMUSG00000041261	Car8	-3.62665	2.50203e-19	KO_down
ENSMUSG00000055632	Hmcn2	-3.62007	1.12418e-36	KO_down
ENSMUSG00000064080	Fbln2	-3.61014	1.25008e-16	KO_down
ENSMUSG00000024391	Apom	-3.60115	3.99933e-05	KO_down
ENSMUSG00000048402	Gli2	-3.58961	2.04172e-49	KO_down
ENSMUSG00000046280	She	-3.58256	3.67173e-05	KO_down
ENSMUSG00000025905	Oprk1	-3.57419	0.0109221	KO_down
ENSMUSG00000014686	Ceacam16	-3.55532	1.42974e-10	KO_down
ENSMUSG00000026676	Ccdc3	-3.55117	0.00154001	KO_down
ENSMUSG00000035246	Pcyt1b	-3.5502	3.42429e-08	KO_down
ENSMUSG00000039323	Igfbp2	-3.53461	0	KO_down
ENSMUSG00000029671	Wnt16	-3.52516	0.0112335	KO_down
ENSMUSG00000019960	Dusp6	-3.51917	2.65154e-09	KO_down
ENSMUSG00000027574	Nkain4	-3.51519	2.62997e-07	KO_down
ENSMUSG00000027793	Ccna1	-3.51061	0.000284417	KO_down
ENSMUSG00000030515	Tarsl2	-3.50017	1.00757e-27	KO_down
ENSMUSG00000040350	Trim7	-3.49094	1.70054e-06	KO_down
ENSMUSG00000009075	Cabp7	-3.4909	0.000386484	KO_down
ENSMUSG00000048752	Prss50	-3.48857	7.56419e-10	KO_down
ENSMUSG00000087600	Pmepa1os	-3.48712	0.0113622	KO_down
ENSMUSG00000038756	Ttll6	-3.48615	1.23923e-18	KO_down
ENSMUSG00000018543	1700001P01Rik	-3.48525	0.000325687	KO_down
ENSMUSG00000020712	Tcam1	-3.484	0.002052	KO_down
ENSMUSG00000086596	Susd5	-3.47806	6.33947e-05	KO_down
ENSMUSG00000024266	Adad2	-3.47795	1.2908e-16	KO_down
ENSMUSG00000024497	Pou4f3	-3.47794	0.0114396	KO_down
ENSMUSG00000027820	Mme	-3.47744	6.96791e-108	KO_down
ENSMUSG00000034891	Sncb	-3.47711	2.49407e-19	KO_down
ENSMUSG00000042246	Tmc7	-3.46563	2.17916e-61	KO_down
ENSMUSG00000021186	Fbln5	-3.45964	1.36405e-11	KO_down
ENSMUSG00000023064	Sncg	-3.45367	1.0174e-14	KO_down
ENSMUSG00000031740	Mmp2	-3.45234	1.0106e-26	KO_down
ENSMUSG00000081297	Gm12209	-3.45224	0.000358126	KO_down
ENSMUSG00000019429	Ffar3	-3.44876	0.0117271	KO_down
ENSMUSG00000006216	Clcnkb	-3.44513	1.8979e-10	KO_down
ENSMUSG00000085389	1700003M07Rik	-3.44104	2.90562e-06	KO_down
ENSMUSG00000006611	Hfe	-3.44088	7.02143e-05	KO_down
ENSMUSG00000029544	Cabp1	-3.4379	2.84633e-08	KO_down
ENSMUSG00000035551	Igfbpl1	-3.43586	0.00212612	KO_down
ENSMUSG00000012396	Nanog	-3.43566	0	KO_down
ENSMUSG00000028179	Cth	-3.42917	6.64252e-14	KO_down
ENSMUSG00000040610	Tlx3	-3.42787	0.0136683	KO_down
ENSMUSG00000074968	Ano3	-3.42487	2.4516e-08	KO_down
ENSMUSG00000036006	Ripor2	-3.41883	0.000414839	KO_down
ENSMUSG00000032011	Thy1	-3.4092	4.04476e-10	KO_down
ENSMUSG00000074303	NA	-3.40343	1.33869e-37	KO_down
ENSMUSG00000026817	Ak1	-3.40327	6.32478e-82	KO_down
ENSMUSG00000047414	Flrt2	-3.40295	0.0121518	KO_down
ENSMUSG00000070280	Slc22a14	-3.40295	0.0121518	KO_down
ENSMUSG00000072662	Mansc4	-3.39196	0.000467939	KO_down
ENSMUSG00000032554	Trf	-3.38103	0.00253958	KO_down
ENSMUSG00000039814	Xkr5	-3.38016	0.000125547	KO_down
ENSMUSG00000005892	Trh	-3.37306	9.69249e-07	KO_down
ENSMUSG00000026437	Cdk18	-3.36904	6.42857e-34	KO_down
ENSMUSG00000090275	NA	-3.36724	0.0125056	KO_down
ENSMUSG00000037649	H2-DMa	-3.3609	1.6041e-08	KO_down
ENSMUSG00000078508	Pramel30	-3.3552	2.96142e-22	KO_down
ENSMUSG00000061524	Zic2	-3.34448	3.67113e-36	KO_down
ENSMUSG00000031654	Cbln1	-3.34258	2.54371e-23	KO_down
ENSMUSG00000041445	Mmrn2	-3.33789	2.86364e-49	KO_down
ENSMUSG00000020027	Socs2	-3.3272	1.43206e-41	KO_down
ENSMUSG00000020407	Upp1	-3.30741	0	KO_down
ENSMUSG00000019894	Slc6a15	-3.29999	3.14406e-08	KO_down
ENSMUSG00000004952	Rasa4	-3.29852	2.97076e-32	KO_down
ENSMUSG00000025219	Fgf8	-3.28549	0.0159717	KO_down
ENSMUSG00000031486	Adgra2	-3.28476	7.9859e-31	KO_down
ENSMUSG00000021373	Cap2	-3.28349	7.88885e-12	KO_down
ENSMUSG00000035910	Dcdc2a	-3.27831	0.000745907	KO_down
ENSMUSG00000078509	Pramel14	-3.27303	2.66793e-12	KO_down
ENSMUSG00000030519	Apba2	-3.25724	6.53534e-05	KO_down
ENSMUSG00000059891	Tsks	-3.25685	0.000200913	KO_down
ENSMUSG00000053475	Tnfaip6	-3.25193	0.0166305	KO_down
ENSMUSG00000048078	Tenm4	-3.24751	1.92071e-07	KO_down
ENSMUSG00000000782	Tcf7	-3.24169	2.30295e-86	KO_down
ENSMUSG00000039741	Bahcc1	-3.23367	4.29497e-54	KO_down
ENSMUSG00000073413	Ly6g6d	-3.23355	6.20727e-05	KO_down
ENSMUSG00000018604	Tbx3	-3.2258	0	KO_down
ENSMUSG00000054763	Defb42	-3.2109	2.2245e-08	KO_down
ENSMUSG00000004698	Hdac9	-3.20389	7.80389e-05	KO_down
ENSMUSG00000063704	Mapk15	-3.20247	1.37987e-06	KO_down
ENSMUSG00000040613	Apobec1	-3.19463	2.11842e-19	KO_down
ENSMUSG00000044216	Kcnj4	-3.19017	7.1853e-06	KO_down
ENSMUSG00000032860	P2ry2	-3.18732	7.10634e-05	KO_down
ENSMUSG00000051367	Six1	-3.18274	1.13826e-12	KO_down
ENSMUSG00000018822	Sfrp5	-3.17426	9.67254e-09	KO_down
ENSMUSG00000027015	Cybrd1	-3.17361	1.59573e-06	KO_down
ENSMUSG00000030350	Prmt8	-3.17054	1.50969e-15	KO_down
ENSMUSG00000086730	Platr12	-3.17028	0.0183327	KO_down
ENSMUSG00000034930	Rtkn	-3.16427	2.18647e-26	KO_down
ENSMUSG00000000486	Septin1	-3.16063	1.7907e-25	KO_down
ENSMUSG00000036052	Dnajb5	-3.15848	4.14315e-23	KO_down
ENSMUSG00000050592	Fam78a	-3.15636	7.28909e-13	KO_down
ENSMUSG00000022096	Hr	-3.15423	1.55755e-07	KO_down
ENSMUSG00000020173	Cobl	-3.14455	2.37062e-10	KO_down
ENSMUSG00000067700	Gm5862	-3.14139	0.0142055	KO_down
ENSMUSG00000045232	Rln3	-3.13287	0.014272	KO_down
ENSMUSG00000066058	Cldn19	-3.13127	0.00468092	KO_down
ENSMUSG00000037754	Ppp1r16b	-3.12244	1.04708e-08	KO_down
ENSMUSG00000017400	Stac2	-3.11938	6.68539e-84	KO_down
ENSMUSG00000085180	AI838599	-3.11716	0.00149609	KO_down
ENSMUSG00000078235	Fam43b	-3.11325	0.0015573	KO_down
ENSMUSG00000023032	Slc4a8	-3.10382	2.69768e-44	KO_down
ENSMUSG00000005465	Il27ra	-3.09853	0.0145339	KO_down
ENSMUSG00000005716	Pvalb	-3.09853	0.0145339	KO_down
ENSMUSG00000030553	Pgpep1l	-3.08579	0.000506014	KO_down
ENSMUSG00000020092	Pald1	-3.0844	1.44497e-203	KO_down
ENSMUSG00000038670	Mybpc2	-3.08412	4.35131e-06	KO_down
ENSMUSG00000043648	Pld6	-3.08321	6.89937e-15	KO_down
ENSMUSG00000013089	Etv5	-3.08028	2.90076e-267	KO_down
ENSMUSG00000081858	Gm14514	-3.07515	0.00570909	KO_down
ENSMUSG00000025089	Gfra1	-3.06531	0.00552349	KO_down
ENSMUSG00000030554	Synm	-3.05852	2.17008e-13	KO_down
ENSMUSG00000023972	Ptk7	-3.04947	1.22814e-251	KO_down
ENSMUSG00000040380	Cbln3	-3.04931	0.000176234	KO_down
ENSMUSG00000083722	Adgrd2-ps	-3.04877	2.1587e-05	KO_down
ENSMUSG00000028865	Cd164l2	-3.04852	1.21752e-13	KO_down
ENSMUSG00000031548	Sfrp1	-3.04526	1.22915e-80	KO_down
ENSMUSG00000080768	Gm12219	-3.03937	0.0149835	KO_down
ENSMUSG00000086236	5830418P13Rik	-3.0372	6.39651e-07	KO_down
ENSMUSG00000075370	Igll1	-3.03356	0.000240994	KO_down
ENSMUSG00000037379	Spon2	-3.02933	0.000682448	KO_down
ENSMUSG00000006411	Nectin4	-3.01794	7.71513e-06	KO_down
ENSMUSG00000031028	Tub	-3.00838	1.54682e-11	KO_down
ENSMUSG00000087516	Tbx3os1	-2.99441	0.00672432	KO_down
ENSMUSG00000093405	Gm20684	-2.99367	0.000264813	KO_down
ENSMUSG00000032291	Crabp1	-2.99069	2.00271e-16	KO_down
ENSMUSG00000030693	Klk10	-2.98339	2.81895e-05	KO_down
ENSMUSG00000086155	9430041J12Rik	-2.98253	0.0225444	KO_down
ENSMUSG00000032946	Rasgrp2	-2.97794	1.34331e-06	KO_down
ENSMUSG00000050860	Phospho1	-2.97514	1.00324e-11	KO_down
ENSMUSG00000021196	Pfkp	-2.97226	0	KO_down
ENSMUSG00000023935	Spats1	-2.97069	3.69122e-05	KO_down
ENSMUSG00000084810	NA	-2.96902	0.022597	KO_down
ENSMUSG00000071537	Klrg2	-2.96735	0.00226803	KO_down
ENSMUSG00000047146	Tet1	-2.9523	0	KO_down
ENSMUSG00000074744	NA	-2.95071	1.33291e-09	KO_down
ENSMUSG00000058571	Gpc6	-2.94625	5.43817e-07	KO_down
ENSMUSG00000016995	Matn4	-2.94454	0.0156535	KO_down
ENSMUSG00000021848	Otx2	-2.94379	2.15029e-57	KO_down
ENSMUSG00000079019	Insl3	-2.93511	0.00286396	KO_down
ENSMUSG00000086617	Gm11635	-2.93321	9.14544e-08	KO_down
ENSMUSG00000062859	Tcp11	-2.91452	7.15217e-14	KO_down
ENSMUSG00000055994	Nod2	-2.91104	1.97916e-08	KO_down
ENSMUSG00000025934	Gsta3	-2.91046	1.96128e-08	KO_down
ENSMUSG00000047632	Fgfbp3	-2.91015	0.000935509	KO_down
ENSMUSG00000059854	Hydin	-2.90949	1.35469e-26	KO_down
ENSMUSG00000049804	Armcx4	-2.90494	7.75449e-31	KO_down
ENSMUSG00000019539	Rcn3	-2.90339	1.17443e-76	KO_down
ENSMUSG00000031662	Snx20	-2.90253	8.65651e-05	KO_down
ENSMUSG00000057715	A830018L16Rik	-2.90076	9.69031e-07	KO_down
ENSMUSG00000091358	Speer5-ps1	-2.89962	0.000176839	KO_down
ENSMUSG00000040289	Hey1	-2.89938	6.51803e-10	KO_down
ENSMUSG00000052889	Prkcb	-2.89461	8.32599e-08	KO_down
ENSMUSG00000053093	Myh7	-2.89131	4.8916e-07	KO_down
ENSMUSG00000001870	Ltbp1	-2.88773	1.17473e-14	KO_down
ENSMUSG00000027703	Lrriq4	-2.88126	2.96531e-10	KO_down
ENSMUSG00000043557	Mdga1	-2.87663	5.9905e-12	KO_down
ENSMUSG00000070337	Gpr179	-2.87041	0.00112905	KO_down
ENSMUSG00000004612	Nkg7	-2.86851	0.0253519	KO_down
ENSMUSG00000028354	Fmn2	-2.86671	1.57187e-14	KO_down
ENSMUSG00000030825	Hsd17b14	-2.86669	6.527e-27	KO_down
ENSMUSG00000021763	Cspg4b	-2.86487	4.28904e-12	KO_down
ENSMUSG00000079110	Capn3	-2.86087	0.00117693	KO_down
ENSMUSG00000042436	Mfap4	-2.8581	0.00874535	KO_down
ENSMUSG00000037852	Cpe	-2.85252	5.22773e-17	KO_down
ENSMUSG00000034486	Gbx2	-2.85205	2.01373e-06	KO_down
ENSMUSG00000059305	Vpreb1	-2.84892	0.00337381	KO_down
ENSMUSG00000034656	Cacna1a	-2.84704	2.20772e-34	KO_down
ENSMUSG00000046186	Cd109	-2.84553	7.13907e-13	KO_down
ENSMUSG00000026768	Itga8	-2.84308	0.00140223	KO_down
ENSMUSG00000025427	Rnf165	-2.843	2.86436e-13	KO_down
ENSMUSG00000055675	Kbtbd11	-2.83891	0.00109997	KO_down
ENSMUSG00000051998	Lax1	-2.83391	0.00923904	KO_down
ENSMUSG00000002769	Gnmt	-2.82102	8.25653e-05	KO_down
ENSMUSG00000021944	Gata4	-2.81378	2.43746e-07	KO_down
ENSMUSG00000029650	Slc46a3	-2.80681	0.00953661	KO_down
ENSMUSG00000087651	1500009L16Rik	-2.80553	5.95354e-45	KO_down
ENSMUSG00000044681	Cnpy1	-2.80232	1.74122e-25	KO_down
ENSMUSG00000027313	Chac1	-2.79934	3.16747e-08	KO_down
ENSMUSG00000036036	Zfp57	-2.79671	5.93815e-217	KO_down
ENSMUSG00000030246	Ldhb	-2.79275	0	KO_down
ENSMUSG00000036256	Igfbp7	-2.79198	0.000653394	KO_down
ENSMUSG00000001566	Mnx1	-2.78865	0.000261597	KO_down
ENSMUSG00000037771	Slc32a1	-2.78862	0.0102526	KO_down
ENSMUSG00000029576	Radil	-2.78587	3.39844e-45	KO_down
ENSMUSG00000024524	Gnal	-2.78378	1.21118e-18	KO_down
ENSMUSG00000025726	Slc28a1	-2.78041	3.30789e-15	KO_down
ENSMUSG00000091614	Gm17657	-2.78032	1.42059e-06	KO_down
ENSMUSG00000026678	Rgs5	-2.7768	0.00427408	KO_down
ENSMUSG00000032368	Zic1	-2.76998	0.00408477	KO_down
ENSMUSG00000019102	Aldh3a1	-2.76824	0.00409848	KO_down
ENSMUSG00000024940	Ltbp3	-2.76756	4.66484e-09	KO_down
ENSMUSG00000040276	Pacsin1	-2.75622	4.36868e-38	KO_down
ENSMUSG00000020940	Efcab15	-2.75607	0.00174033	KO_down
ENSMUSG00000054252	Fgfr3	-2.75383	1.31271e-16	KO_down
ENSMUSG00000030270	Cpne9	-2.75318	3.4279e-05	KO_down
ENSMUSG00000078814	NA	-2.7513	0.0045525	KO_down
ENSMUSG00000001417	NA	-2.74549	0.00481629	KO_down
ENSMUSG00000001076	C1ql4	-2.74512	0.00209114	KO_down
ENSMUSG00000041117	Ccdc8	-2.73362	4.97932e-07	KO_down
ENSMUSG00000060548	Tnfrsf19	-2.73246	3.9318e-14	KO_down
ENSMUSG00000025196	Cpn1	-2.73142	5.33276e-23	KO_down
ENSMUSG00000042417	Ccno	-2.731	1.28337e-05	KO_down
ENSMUSG00000035451	Foxa1	-2.73018	1.77869e-05	KO_down
ENSMUSG00000020411	Nipal4	-2.72916	0.0111069	KO_down
ENSMUSG00000020583	Matn3	-2.72809	4.59318e-09	KO_down
ENSMUSG00000024084	Qpct	-2.72737	5.84596e-11	KO_down
ENSMUSG00000038354	Ankrd35	-2.72366	1.12324e-08	KO_down
ENSMUSG00000030329	Pianp	-2.72341	0.0112324	KO_down
ENSMUSG00000061013	Mkx	-2.72341	4.99157e-12	KO_down
ENSMUSG00000036964	Trim17	-2.72275	0.0113004	KO_down
ENSMUSG00000030722	Nfatc2ip	-2.72236	5.01693e-212	KO_down
ENSMUSG00000039629	Strip2	-2.72202	2.9512e-12	KO_down
ENSMUSG00000011382	Dhdh	-2.7161	4.2893e-13	KO_down
ENSMUSG00000055629	B4galnt4	-2.71267	7.12514e-19	KO_down
ENSMUSG00000039953	Clstn1	-2.70927	0	KO_down
ENSMUSG00000071847	Apcdd1	-2.70586	1.24223e-20	KO_down
ENSMUSG00000070576	Mn1	-2.69974	2.5852e-09	KO_down
ENSMUSG00000024366	Gfra3	-2.69473	4.76092e-07	KO_down
ENSMUSG00000032087	Dscaml1	-2.69434	4.14254e-05	KO_down
ENSMUSG00000038370	Pcp4l1	-2.69358	0.00102622	KO_down
ENSMUSG00000025194	Abcc2	-2.69338	2.26763e-05	KO_down
ENSMUSG00000038400	Pmepa1	-2.6909	4.97342e-29	KO_down
ENSMUSG00000038840	Birc7	-2.69033	0.00106944	KO_down
ENSMUSG00000029304	Spp1	-2.6894	0	KO_down
ENSMUSG00000020785	Camkk1	-2.68435	2.45568e-07	KO_down
ENSMUSG00000026227	2810459M11Rik	-2.68393	0.0127537	KO_down
ENSMUSG00000040412	Elapor1	-2.68353	0.0298708	KO_down
ENSMUSG00000074818	Pdzd7	-2.67958	0.000213072	KO_down
ENSMUSG00000026814	Eng	-2.67839	2.72802e-38	KO_down
ENSMUSG00000059645	Gm7361	-2.67838	0.00105083	KO_down
ENSMUSG00000053216	Btn2a2	-2.67621	0.000233879	KO_down
ENSMUSG00000062296	Trank1	-2.663	6.12053e-13	KO_down
ENSMUSG00000038793	Lefty1	-2.65658	0.002773	KO_down
ENSMUSG00000041583	Obox6	-2.65534	6.75752e-05	KO_down
ENSMUSG00000028749	Pla2g2f	-2.65152	4.49298e-08	KO_down
ENSMUSG00000032796	Lama1	-2.64494	7.74843e-138	KO_down
ENSMUSG00000013989	NA	-2.64097	0.00125997	KO_down
ENSMUSG00000090071	Cdk5r2	-2.64055	5.7587e-05	KO_down
ENSMUSG00000032135	Mcam	-2.63991	1.4131e-33	KO_down
ENSMUSG00000031290	Lrch2	-2.63452	2.80108e-12	KO_down
ENSMUSG00000029468	P2rx7	-2.6326	1.54008e-11	KO_down
ENSMUSG00000054256	Msi1	-2.629	4.28537e-78	KO_down
ENSMUSG00000024990	Rbp4	-2.62848	0.00277815	KO_down
ENSMUSG00000028294	Cfap206	-2.62794	0.00287213	KO_down
ENSMUSG00000046447	Camk2n1	-2.62574	1.7456e-18	KO_down
ENSMUSG00000025496	Drd4	-2.62306	2.81655e-07	KO_down
ENSMUSG00000051648	Kctd19	-2.62207	0.0139174	KO_down
ENSMUSG00000044177	Wfikkn2	-2.62184	0.00358008	KO_down
ENSMUSG00000069825	Gm49340	-2.6197	0.0141836	KO_down
ENSMUSG00000042388	Dlgap3	-2.61639	1.30822e-20	KO_down
ENSMUSG00000086219	Srrm4os	-2.61054	2.41415e-06	KO_down
ENSMUSG00000034275	Igsf9b	-2.60978	1.03524e-39	KO_down
ENSMUSG00000001930	Vwf	-2.60699	5.07362e-26	KO_down
ENSMUSG00000037405	Icam1	-2.60674	0	KO_down
ENSMUSG00000026193	Fn1	-2.60531	0	KO_down
ENSMUSG00000030208	Emp1	-2.60244	9.98246e-13	KO_down
ENSMUSG00000050379	Septin6	-2.60208	2.94413e-28	KO_down
ENSMUSG00000034910	Pygo1	-2.6014	6.56544e-07	KO_down
ENSMUSG00000022528	Hes1	-2.59954	1.78649e-23	KO_down
ENSMUSG00000070880	Gad1	-2.59915	0.00158672	KO_down
ENSMUSG00000028707	Dmbx1	-2.59451	0.000368453	KO_down
ENSMUSG00000050751	Pgbd5	-2.58916	9.44716e-10	KO_down
ENSMUSG00000082079	Dnmt3c	-2.58262	0.0329536	KO_down
ENSMUSG00000000731	Aire	-2.58178	1.00336e-57	KO_down
ENSMUSG00000028051	Hcn3	-2.5795	5.09686e-09	KO_down
ENSMUSG00000028581	Laptm5	-2.5769	3.44599e-50	KO_down
ENSMUSG00000040533	Matn1	-2.57255	0.000104663	KO_down
ENSMUSG00000026950	Neb	-2.57144	7.29909e-17	KO_down
ENSMUSG00000051515	Fam181b	-2.57116	0.0329151	KO_down
ENSMUSG00000087179	5730471H19Rik	-2.56636	9.4804e-08	KO_down
ENSMUSG00000021614	Vcan	-2.56551	5.50384e-08	KO_down
ENSMUSG00000013033	Adgrl1	-2.56463	2.84421e-74	KO_down
ENSMUSG00000022475	Hdac7	-2.56172	4.18908e-15	KO_down
ENSMUSG00000028039	Efna3	-2.55985	1.35229e-05	KO_down
ENSMUSG00000054659	Pm20d2	-2.55523	0.000918669	KO_down
ENSMUSG00000021278	Amn	-2.55248	0.00096669	KO_down
ENSMUSG00000005107	Slc2a9	-2.55078	0.0178923	KO_down
ENSMUSG00000054793	Cadm4	-2.54793	3.89556e-52	KO_down
ENSMUSG00000048251	Bcl11b	-2.54363	1.00452e-07	KO_down
ENSMUSG00000034911	Ushbp1	-2.54355	0.00214628	KO_down
ENSMUSG00000031451	Gas6	-2.54193	2.07222e-32	KO_down
ENSMUSG00000089896	NA	-2.53226	1.34871e-24	KO_down
ENSMUSG00000023391	Dlx2	-2.53211	0.0010962	KO_down
ENSMUSG00000031160	Eras	-2.5299	2.55948e-14	KO_down
ENSMUSG00000022114	Spry2	-2.52967	8.34516e-37	KO_down
ENSMUSG00000028789	Azin2	-2.52651	6.56535e-43	KO_down
ENSMUSG00000057534	Elobl	-2.52391	1.97398e-05	KO_down
ENSMUSG00000026748	Plxdc2	-2.52139	1.04404e-07	KO_down
ENSMUSG00000023903	Mmp25	-2.51961	0.0160477	KO_down
ENSMUSG00000049036	Tmem121	-2.51804	4.41315e-07	KO_down
ENSMUSG00000030731	Syt3	-2.51001	0.00223989	KO_down
ENSMUSG00000029121	Crmp1	-2.50775	1.38131e-05	KO_down
ENSMUSG00000022623	Shank3	-2.50692	4.64839e-15	KO_down
ENSMUSG00000024063	Lbh	-2.50648	9.60495e-29	KO_down
ENSMUSG00000022390	Zc3h7b	-2.50375	6.17751e-98	KO_down
ENSMUSG00000023045	Soat2	-2.50325	9.18728e-05	KO_down
ENSMUSG00000010651	Acaa1b	-2.50306	2.45467e-14	KO_down
ENSMUSG00000024670	Cd6	-2.49998	2.58537e-06	KO_down
ENSMUSG00000073414	Mpig6b	-2.49989	0.016896	KO_down
ENSMUSG00000049313	Sorl1	-2.49819	6.91105e-122	KO_down
ENSMUSG00000040488	Ltbp4	-2.49579	3.83567e-108	KO_down
ENSMUSG00000031329	Tsx	-2.49567	8.92356e-05	KO_down
ENSMUSG00000025265	Fgd1	-2.49373	8.79354e-202	KO_down
ENSMUSG00000027530	Fabp12	-2.49123	0.0353211	KO_down
ENSMUSG00000078815	Cacng6	-2.49079	2.82585e-08	KO_down
ENSMUSG00000020601	Trib2	-2.48982	8.97376e-06	KO_down
ENSMUSG00000030838	Ush1c	-2.48948	5.66401e-06	KO_down
ENSMUSG00000022652	Morc1	-2.48737	8.67978e-61	KO_down
ENSMUSG00000051726	Kcnf1	-2.48729	0.00459671	KO_down
ENSMUSG00000005952	Trpv1	-2.48621	0.00869588	KO_down
ENSMUSG00000029436	Mmp17	-2.4853	2.77352e-07	KO_down
ENSMUSG00000027955	Gask1b	-2.48515	7.18609e-19	KO_down
ENSMUSG00000021765	Fst	-2.47757	0.00882763	KO_down
ENSMUSG00000025557	Slc15a1	-2.47698	6.95881e-08	KO_down
ENSMUSG00000030110	Ret	-2.47664	1.85872e-05	KO_down
ENSMUSG00000031074	Fgf3	-2.47621	6.1341e-07	KO_down
ENSMUSG00000085894	Gm15832	-2.47295	0.00478624	KO_down
ENSMUSG00000017493	Igfbp4	-2.4666	2.35702e-37	KO_down
ENSMUSG00000006221	Hspb7	-2.46408	0.00150714	KO_down
ENSMUSG00000060586	H2-Eb1	-2.46026	6.94033e-12	KO_down
ENSMUSG00000070291	Ddx43	-2.44244	2.30224e-13	KO_down
ENSMUSG00000039539	Sgcz	-2.43905	0.00518312	KO_down
ENSMUSG00000002341	Ncan	-2.43892	0.00611984	KO_down
ENSMUSG00000028971	Cort	-2.43737	7.29001e-05	KO_down
ENSMUSG00000025478	Dpysl4	-2.43593	0.000470427	KO_down
ENSMUSG00000025582	Nptx1	-2.43589	8.4237e-09	KO_down
ENSMUSG00000089662	Gm14057	-2.43355	0.00114058	KO_down
ENSMUSG00000000120	Ngfr	-2.43292	5.39263e-11	KO_down
ENSMUSG00000052105	Mtcl1	-2.42903	4.80378e-123	KO_down
ENSMUSG00000046449	Nexmif	-2.42872	1.28674e-11	KO_down
ENSMUSG00000075304	Sp5	-2.42036	0.019288	KO_down
ENSMUSG00000032419	Tbx18	-2.41539	0.0101427	KO_down
ENSMUSG00000041703	Zic5	-2.41374	1.52498e-13	KO_down
ENSMUSG00000038473	Nos1ap	-2.41306	1.29038e-07	KO_down
ENSMUSG00000021362	Gcm2	-2.41298	1.74097e-05	KO_down
ENSMUSG00000021953	Tdh	-2.40984	0.03767	KO_down
ENSMUSG00000041642	Kif21b	-2.40703	1.40553e-46	KO_down
ENSMUSG00000073988	Ttpa	-2.40432	0.000212496	KO_down
ENSMUSG00000037171	Nodal	-2.40347	1.72845e-15	KO_down
ENSMUSG00000031775	Pllp	-2.40271	0.00341953	KO_down
ENSMUSG00000081126	Gm15784	-2.39878	0.0376149	KO_down
ENSMUSG00000057093	Zfp607b	-2.39764	1.2239e-12	KO_down
ENSMUSG00000035969	Rusc2	-2.39459	2.74163e-90	KO_down
ENSMUSG00000039278	Pcsk1n	-2.39306	2.48391e-42	KO_down
ENSMUSG00000020614	Fam20a	-2.38668	0.0382413	KO_down
ENSMUSG00000037224	Zfyve28	-2.38295	6.0405e-15	KO_down
ENSMUSG00000035775	Krt20	-2.38191	0.0197218	KO_down
ENSMUSG00000070687	Htr1d	-2.37707	0.0381019	KO_down
ENSMUSG00000034799	Unc13a	-2.37572	6.55943e-22	KO_down
ENSMUSG00000001655	Hoxc13	-2.37563	4.52131e-11	KO_down
ENSMUSG00000027577	Chrna4	-2.3733	0.00223916	KO_down
ENSMUSG00000009585	Apobec3	-2.37239	6.52005e-99	KO_down
ENSMUSG00000021483	Cdk20	-2.36951	4.54368e-11	KO_down
ENSMUSG00000027660	Skil	-2.36477	5.47088e-130	KO_down
ENSMUSG00000073534	NA	-2.36355	0.000233195	KO_down
ENSMUSG00000008489	Elavl2	-2.36097	1.08512e-25	KO_down
ENSMUSG00000029471	Camkk2	-2.35989	2.73199e-11	KO_down
ENSMUSG00000040181	Fmo1	-2.35954	0.000480611	KO_down
ENSMUSG00000043587	Pxylp1	-2.35768	1.13907e-11	KO_down
ENSMUSG00000028834	Trim63	-2.35707	5.34755e-06	KO_down
ENSMUSG00000030513	Pcsk6	-2.35574	7.11644e-127	KO_down
ENSMUSG00000022098	Bmp1	-2.35335	8.15551e-05	KO_down
ENSMUSG00000036098	Myrf	-2.35198	6.69163e-11	KO_down
ENSMUSG00000020216	Jsrp1	-2.34681	0.000606682	KO_down
ENSMUSG00000040118	Cacna2d1	-2.34448	2.19443e-10	KO_down
ENSMUSG00000041670	Rims1	-2.34319	1.44113e-10	KO_down
ENSMUSG00000028637	Ccdc30	-2.3428	3.09039e-05	KO_down
ENSMUSG00000022055	Nefl	-2.33468	1.2354e-07	KO_down
ENSMUSG00000010592	Dazl	-2.333	3.55386e-268	KO_down
ENSMUSG00000039954	Stk32a	-2.33283	0.0216741	KO_down
ENSMUSG00000062785	Kcnc3	-2.3301	1.20987e-18	KO_down
ENSMUSG00000046323	Dppa3	-2.32819	5.55021e-71	KO_down
ENSMUSG00000034645	Zyg11a	-2.32131	2.82117e-47	KO_down
ENSMUSG00000030431	Tmem238	-2.32045	0.00282171	KO_down
ENSMUSG00000044576	Garem2	-2.31482	0.00470447	KO_down
ENSMUSG00000022419	Deptor	-2.31361	3.52409e-129	KO_down
ENSMUSG00000049037	Clec4a1	-2.31359	0.00154819	KO_down
ENSMUSG00000036766	Dner	-2.31012	4.10112e-06	KO_down
ENSMUSG00000026109	Tmeff2	-2.30656	0.013695	KO_down
ENSMUSG00000020805	Slc13a5	-2.30396	9.59381e-09	KO_down
ENSMUSG00000084958	NA	-2.30302	1.97443e-07	KO_down
ENSMUSG00000036867	Smad6	-2.30277	8.63398e-10	KO_down
ENSMUSG00000080916	Gm12463	-2.30226	9.81968e-06	KO_down
ENSMUSG00000059901	Adamts14	-2.30058	2.0431e-17	KO_down
ENSMUSG00000015647	Lama5	-2.2891	0	KO_down
ENSMUSG00000046807	Lrrc75b	-2.28857	0.00904432	KO_down
ENSMUSG00000022602	Arc	-2.28561	2.36308e-27	KO_down
ENSMUSG00000021846	Peli2	-2.28387	5.48792e-10	KO_down
ENSMUSG00000031169	Porcn	-2.2773	2.93134e-09	KO_down
ENSMUSG00000045349	Sh2d5	-2.27592	1.03905e-11	KO_down
ENSMUSG00000029862	Clcn1	-2.27184	9.01492e-07	KO_down
ENSMUSG00000024462	Gabbr1	-2.27075	5.7069e-107	KO_down
ENSMUSG00000045589	Frrs1l	-2.26946	4.08666e-05	KO_down
ENSMUSG00000015354	Pcolce2	-2.26798	8.15134e-09	KO_down
ENSMUSG00000024965	Fermt3	-2.26793	1.5225e-07	KO_down
ENSMUSG00000001819	Hoxd13	-2.26233	0.00361165	KO_down
ENSMUSG00000039860	Srrm3	-2.26002	0.0235094	KO_down
ENSMUSG00000003992	Ssbp2	-2.25921	3.82279e-09	KO_down
ENSMUSG00000022840	Adcy5	-2.25626	0.000117065	KO_down
ENSMUSG00000046714	Foxc2	-2.23896	0.00969422	KO_down
ENSMUSG00000039410	Prdm16	-2.23634	1.55559e-19	KO_down
ENSMUSG00000020774	Aspa	-2.23622	2.93964e-07	KO_down
ENSMUSG00000070327	Rnf213	-2.23554	1.65818e-176	KO_down
ENSMUSG00000046157	Tmem229b	-2.23417	2.83958e-08	KO_down
ENSMUSG00000092354	Gm20548	-2.22455	0.00712991	KO_down
ENSMUSG00000074218	Cox7a1	-2.22396	1.62432e-27	KO_down
ENSMUSG00000022229	Atp12a	-2.22382	8.4426e-07	KO_down
ENSMUSG00000026259	Ngef	-2.2231	1.39635e-05	KO_down
ENSMUSG00000029512	Ulk1	-2.21882	0	KO_down
ENSMUSG00000020020	Usp44	-2.21768	9.73222e-11	KO_down
ENSMUSG00000020143	Dock2	-2.21646	0.0250851	KO_down
ENSMUSG00000075012	Fjx1	-2.21546	0.0429016	KO_down
ENSMUSG00000066885	NA	-2.2124	0.0429548	KO_down
ENSMUSG00000024206	Rfx2	-2.20878	1.19474e-150	KO_down
ENSMUSG00000070643	Sox13	-2.20851	1.40887e-29	KO_down
ENSMUSG00000064264	Zfp428	-2.20837	2.59957e-23	KO_down
ENSMUSG00000031119	Gpc4	-2.20234	3.65177e-34	KO_down
ENSMUSG00000033715	Akr1c14	-2.19998	0.00681928	KO_down
ENSMUSG00000020953	Coch	-2.19986	4.31279e-05	KO_down
ENSMUSG00000037990	Sh3rf3	-2.19963	0.0254215	KO_down
ENSMUSG00000040943	Tet2	-2.198	1.10435e-144	KO_down
ENSMUSG00000058741	Prr19	-2.19756	0.0103969	KO_down
ENSMUSG00000085708	Gm16063	-2.19687	0.0111048	KO_down
ENSMUSG00000032491	Nradd	-2.19666	5.50572e-10	KO_down
ENSMUSG00000031898	Dpep3	-2.19662	8.33892e-07	KO_down
ENSMUSG00000057182	Scn3a	-2.19631	0.0107675	KO_down
ENSMUSG00000043036	Ccdc63	-2.19296	2.14414e-05	KO_down
ENSMUSG00000001435	Col18a1	-2.19241	4.13364e-276	KO_down
ENSMUSG00000022843	Clcn2	-2.19041	3.84623e-31	KO_down
ENSMUSG00000005958	Ephb3	-2.18838	1.44667e-83	KO_down
ENSMUSG00000001986	Gria3	-2.18795	0.00672561	KO_down
ENSMUSG00000043259	Fam13c	-2.18666	5.12663e-09	KO_down
ENSMUSG00000029235	Pdcl2	-2.18421	0.0165316	KO_down
ENSMUSG00000059149	Mfsd4a	-2.18421	0.0165316	KO_down
ENSMUSG00000036596	Cpz	-2.18235	0.0260217	KO_down
ENSMUSG00000024619	Cdx1	-2.18216	0.000344596	KO_down
ENSMUSG00000054662	Ano9	-2.18147	2.87523e-27	KO_down
ENSMUSG00000020577	Tspan13	-2.17686	2.84167e-37	KO_down
ENSMUSG00000006784	Odad4	-2.17458	2.82978e-06	KO_down
ENSMUSG00000042477	Tfap2e	-2.1694	0.00739103	KO_down
ENSMUSG00000040136	Abcc8	-2.16912	0.0022376	KO_down
ENSMUSG00000021364	Elovl2	-2.16747	4.95529e-15	KO_down
ENSMUSG00000025626	Phf6	-2.16484	4.65701e-15	KO_down
ENSMUSG00000008496	Pou2f2	-2.16444	0.0110913	KO_down
ENSMUSG00000069806	Cacng7	-2.16347	1.47012e-15	KO_down
ENSMUSG00000031112	Stk26	-2.15962	0.00265573	KO_down
ENSMUSG00000087332	Gm12690	-2.15813	0.0126267	KO_down
ENSMUSG00000033987	Dnah17	-2.15811	3.49134e-05	KO_down
ENSMUSG00000028681	Ptch2	-2.15732	1.19582e-10	KO_down
ENSMUSG00000042763	Maneal	-2.15596	0.00206648	KO_down
ENSMUSG00000019970	Sgk1	-2.15255	1.46798e-249	KO_down
ENSMUSG00000040860	Crocc	-2.15114	2.20468e-63	KO_down
ENSMUSG00000042808	Gpx2	-2.15039	0.0118571	KO_down
ENSMUSG00000023809	Rps6ka2	-2.14813	2.67408e-11	KO_down
ENSMUSG00000079471	Mymx	-2.14049	1.83068e-20	KO_down
ENSMUSG00000022113	Trim52	-2.14013	9.80845e-09	KO_down
ENSMUSG00000005950	P2rx5	-2.13738	0.00275552	KO_down
ENSMUSG00000060461	Dppa5a	-2.13495	0	KO_down
ENSMUSG00000038045	Sult6b1	-2.13428	0.00353719	KO_down
ENSMUSG00000038146	Notch3	-2.13251	1.70477e-79	KO_down
ENSMUSG00000037788	Vopp1	-2.13022	2.64919e-07	KO_down
ENSMUSG00000046711	Hmga1	-2.12915	3.37417e-167	KO_down
ENSMUSG00000031101	Sash3	-2.12566	0.00950999	KO_down
ENSMUSG00000061728	Btnl7-ps	-2.11884	5.34052e-06	KO_down
ENSMUSG00000064918	Gm22571	-2.11787	0.00394234	KO_down
ENSMUSG00000033768	Nrxn2	-2.11613	1.63493e-07	KO_down
ENSMUSG00000040669	Phc1	-2.11443	1.43253e-56	KO_down
ENSMUSG00000039616	Mocos	-2.11411	1.81572e-08	KO_down
ENSMUSG00000038763	Alpk3	-2.11331	3.31988e-133	KO_down
ENSMUSG00000079657	Rab26	-2.1122	9.20709e-07	KO_down
ENSMUSG00000048924	Ccdc125	-2.11157	0.0014947	KO_down
ENSMUSG00000007379	Dennd2c	-2.10974	1.34083e-74	KO_down
ENSMUSG00000028654	Mycl	-2.10876	4.63115e-21	KO_down
ENSMUSG00000034573	Ptpn13	-2.10472	1.93943e-120	KO_down
ENSMUSG00000016918	Sulf1	-2.10413	2.09154e-07	KO_down
ENSMUSG00000059937	NA	-2.10377	6.55244e-18	KO_down
ENSMUSG00000025902	Sox17	-2.10211	0.00719267	KO_down
ENSMUSG00000041729	Coro2b	-2.09876	1.53605e-19	KO_down
ENSMUSG00000021806	Nid2	-2.09738	0	KO_down
ENSMUSG00000078484	NA	-2.09639	2.29133e-08	KO_down
ENSMUSG00000004891	Nes	-2.09634	3.10685e-48	KO_down
ENSMUSG00000026923	Notch1	-2.09224	3.41278e-168	KO_down
ENSMUSG00000031877	Ces2g	-2.0919	0.044745	KO_down
ENSMUSG00000021745	NA	-2.09024	4.77516e-83	KO_down
ENSMUSG00000051176	Zfp42	-2.08471	3.08933e-233	KO_down
ENSMUSG00000047787	Flrt1	-2.08446	0.000140412	KO_down
ENSMUSG00000020182	Ddc	-2.08367	1.63462e-08	KO_down
ENSMUSG00000029420	Rimbp2	-2.08239	0.000436286	KO_down
ENSMUSG00000090919	Pabpc4l	-2.08123	3.51428e-05	KO_down
ENSMUSG00000025197	Cyp2c23	-2.08015	0.0457804	KO_down
ENSMUSG00000009097	Tbx1	-2.07816	0.0295081	KO_down
ENSMUSG00000031432	Prps1	-2.07753	2.02901e-237	KO_down
ENSMUSG00000026288	Inpp5d	-2.07036	3.68852e-234	KO_down
ENSMUSG00000006342	Susd2	-2.06651	6.66395e-37	KO_down
ENSMUSG00000027254	Map1a	-2.066	3.95607e-34	KO_down
ENSMUSG00000021256	Vash1	-2.06571	1.0071e-10	KO_down
ENSMUSG00000044664	Prss42	-2.06419	6.93407e-08	KO_down
ENSMUSG00000061436	Hipk2	-2.06338	2.19278e-14	KO_down
ENSMUSG00000003934	Efnb3	-2.06294	2.43525e-10	KO_down
ENSMUSG00000051736	Fam229b	-2.05858	0.00177451	KO_down
ENSMUSG00000021061	Sptb	-2.05732	1.28304e-35	KO_down
ENSMUSG00000041078	Grid1	-2.05663	0.000110469	KO_down
ENSMUSG00000053164	Gpr21	-2.05563	0.0309208	KO_down
ENSMUSG00000040234	Tm7sf3	-2.05186	8.99933e-101	KO_down
ENSMUSG00000005320	Fgfr4	-2.05174	8.23471e-11	KO_down
ENSMUSG00000044320	1700001O22Rik	-2.05128	0.00765538	KO_down
ENSMUSG00000006651	Aplp1	-2.04628	2.80718e-36	KO_down
ENSMUSG00000026959	Grin1	-2.04333	4.54824e-124	KO_down
ENSMUSG00000039328	Rnf122	-2.04309	2.42815e-06	KO_down
ENSMUSG00000066964	Tmem211	-2.04263	0.016879	KO_down
ENSMUSG00000052921	Arhgef15	-2.04225	4.38734e-05	KO_down
ENSMUSG00000027316	Gfra4	-2.04217	0.0011534	KO_down
ENSMUSG00000071984	Fndc1	-2.04001	0.00118089	KO_down
ENSMUSG00000021381	Barx1	-2.03588	3.4244e-05	KO_down
ENSMUSG00000032268	Tmprss5	-2.03501	0.00792168	KO_down
ENSMUSG00000028701	Lurap1	-2.03297	0.000214551	KO_down
ENSMUSG00000046480	Scn4b	-2.03137	0.0219247	KO_down
ENSMUSG00000024998	Plce1	-2.03038	8.01502e-08	KO_down
ENSMUSG00000025333	Gpr143	-2.03025	0.0189862	KO_down
ENSMUSG00000028093	Acp6	-2.02916	3.32337e-148	KO_down
ENSMUSG00000056608	Chd9	-2.02732	1.51626e-84	KO_down
ENSMUSG00000057378	Ryr3	-2.02558	0.0226208	KO_down
ENSMUSG00000002076	Hsf2bp	-2.02182	2.31027e-34	KO_down
ENSMUSG00000010051	Hyal1	-2.0188	5.53224e-12	KO_down
ENSMUSG00000089669	Tnfsf13	-2.01836	0.0160163	KO_down
ENSMUSG00000034391	Fbxo15	-2.01665	0	KO_down
ENSMUSG00000005947	Itgae	-2.01623	0.00192209	KO_down
ENSMUSG00000092569	Gm20544	-2.01533	0.00802684	KO_down
ENSMUSG00000024665	Fads2	-2.01442	4.94104e-56	KO_down
ENSMUSG00000030102	Itpr1	-2.01306	1.0105e-117	KO_down
ENSMUSG00000050822	Slc29a4	-2.01232	3.55859e-23	KO_down
ENSMUSG00000026825	Dnm1	-2.01029	5.87868e-41	KO_down
ENSMUSG00000005672	Kit	-2.00984	1.75896e-148	KO_down
ENSMUSG00000064158	Izumo1	-2.00971	0.0161992	KO_down
ENSMUSG00000006219	Fblim1	-2.00912	1.40736e-80	KO_down
ENSMUSG00000045092	S1pr1	-2.00898	8.45663e-06	KO_down
ENSMUSG00000076430	Hus1b	-2.00718	0.0177822	KO_down
ENSMUSG00000038679	Trps1	-2.00641	3.23252e-10	KO_down
ENSMUSG00000011263	Exoc3l2	-2.00619	0.000100293	KO_down
ENSMUSG00000045730	Adrb2	-2.00325	5.5546e-08	KO_down
ENSMUSG00000038437	Mllt6	-2.00275	2.01353e-84	KO_down
ENSMUSG00000043629	1700019D03Rik	-2.0006	1.32531e-06	KO_down
ENSMUSG00000084943	NA	-1.99819	0.00240614	KO_down
ENSMUSG00000003418	St8sia6	-1.99759	0.000535491	KO_down
ENSMUSG00000010342	Tex14	-1.9955	5.56439e-12	KO_down
ENSMUSG00000073421	H2-Ab1	-1.99246	3.60604e-09	KO_down
ENSMUSG00000023931	Efhb	-1.99179	1.29667e-05	KO_down
ENSMUSG00000022883	Robo1	-1.98995	1.75794e-23	KO_down
ENSMUSG00000030592	Ryr1	-1.98801	1.17997e-33	KO_down
ENSMUSG00000025059	Gk	-1.98667	3.20678e-24	KO_down
ENSMUSG00000088088	Rmrp	-1.98424	8.94732e-05	KO_down
ENSMUSG00000078640	Gm11627	-1.98373	0.0331456	KO_down
ENSMUSG00000000544	Gpa33	-1.98334	1.92205e-19	KO_down
ENSMUSG00000023902	Zscan10	-1.98272	5.6598e-23	KO_down
ENSMUSG00000010021	Kif19a	-1.98255	0.000739671	KO_down
ENSMUSG00000002885	Adgre5	-1.98235	8.90813e-154	KO_down
ENSMUSG00000086291	Gm15513	-1.98207	0.00233161	KO_down
ENSMUSG00000066643	Wdr35	-1.98076	3.43315e-95	KO_down
ENSMUSG00000028519	Dab1	-1.97982	0.000139583	KO_down
ENSMUSG00000049281	Scn3b	-1.97688	4.7863e-12	KO_down
ENSMUSG00000025964	Adam23	-1.97544	1.09412e-26	KO_down
ENSMUSG00000039252	Lgi2	-1.97324	8.13063e-07	KO_down
ENSMUSG00000030263	Lrmp	-1.9724	2.11753e-10	KO_down
ENSMUSG00000027555	Car13	-1.9712	2.2717e-08	KO_down
ENSMUSG00000048279	Sacs	-1.97086	9.49647e-26	KO_down
ENSMUSG00000048905	Bnip5	-1.97074	6.00373e-08	KO_down
ENSMUSG00000051435	Fhad1	-1.9683	6.34983e-16	KO_down
ENSMUSG00000032609	Klhdc8b	-1.96687	3.54524e-05	KO_down
ENSMUSG00000032186	Tmod2	-1.96567	1.08887e-06	KO_down
ENSMUSG00000022537	Tmem44	-1.96085	1.36384e-13	KO_down
ENSMUSG00000016028	Celsr1	-1.96026	3.43541e-59	KO_down
ENSMUSG00000022816	Fstl1	-1.95905	2.11847e-31	KO_down
ENSMUSG00000028078	Dclk2	-1.95835	2.49598e-29	KO_down
ENSMUSG00000025938	Slco5a1	-1.9566	1.39258e-10	KO_down
ENSMUSG00000032374	Plod2	-1.95653	3.19352e-110	KO_down
ENSMUSG00000015083	C8g	-1.95603	0.0103643	KO_down
ENSMUSG00000020105	Lrig3	-1.95592	1.92529e-18	KO_down
ENSMUSG00000021798	Ldb3	-1.95583	0.00277827	KO_down
ENSMUSG00000054046	Klk13	-1.95561	0.000446986	KO_down
ENSMUSG00000029151	Slc30a3	-1.95524	0.0181879	KO_down
ENSMUSG00000032262	Elovl4	-1.95497	1.5205e-08	KO_down
ENSMUSG00000044734	Serpinb1a	-1.95389	8.31115e-10	KO_down
ENSMUSG00000028528	Dnajc6	-1.95077	8.97913e-28	KO_down
ENSMUSG00000038776	Ephx1	-1.94999	3.64254e-45	KO_down
ENSMUSG00000092867	Mir3058	-1.94906	0.0493762	KO_down
ENSMUSG00000029120	Ppp2r2c	-1.94851	1.11986e-09	KO_down
ENSMUSG00000034936	Arl4d	-1.9478	8.21368e-45	KO_down
ENSMUSG00000048388	Fam171b	-1.94736	0.000138665	KO_down
ENSMUSG00000033852	Gm28042	-1.94735	2.41e-30	KO_down
ENSMUSG00000086003	B230206L02Rik	-1.94496	1.62002e-05	KO_down
ENSMUSG00000026278	Bok	-1.94163	1.18492e-05	KO_down
ENSMUSG00000040624	Plekhg1	-1.93939	6.85229e-45	KO_down
ENSMUSG00000040537	Adam22	-1.93865	1.66128e-15	KO_down
ENSMUSG00000049551	Fzd9	-1.9377	1.31982e-08	KO_down
ENSMUSG00000035678	Tnfsf9	-1.9375	0.0495884	KO_down
ENSMUSG00000003283	Hck	-1.93358	4.75348e-08	KO_down
ENSMUSG00000063011	Msln	-1.93008	0.0497892	KO_down
ENSMUSG00000032380	Dapk2	-1.92628	0.000937465	KO_down
ENSMUSG00000027966	Col11a1	-1.92521	0.00035819	KO_down
ENSMUSG00000037509	Arhgef4	-1.92254	5.17785e-13	KO_down
ENSMUSG00000015709	Arnt2	-1.92171	0.000530425	KO_down
ENSMUSG00000022542	Septin12	-1.92077	0.000657445	KO_down
ENSMUSG00000020431	Adcy1	-1.91871	1.10951e-10	KO_down
ENSMUSG00000078794	Dact3	-1.91841	1.87465e-32	KO_down
ENSMUSG00000025328	Padi3	-1.91327	3.99189e-07	KO_down
ENSMUSG00000060591	Ifitm2	-1.91154	9.66958e-147	KO_down
ENSMUSG00000019577	Pdk4	-1.91011	2.63876e-32	KO_down
ENSMUSG00000087391	NA	-1.9088	4.17954e-10	KO_down
ENSMUSG00000028518	Prkaa2	-1.90793	1.35955e-26	KO_down
ENSMUSG00000025507	Pidd1	-1.90776	3.577e-28	KO_down
ENSMUSG00000008734	Gprc5b	-1.90127	1.40604e-31	KO_down
ENSMUSG00000032348	Gsta4	-1.9012	1.06013e-186	KO_down
ENSMUSG00000037035	Inhbb	-1.89398	0.000197741	KO_down
ENSMUSG00000046133	C130073F10Rik	-1.89382	4.98111e-27	KO_down
ENSMUSG00000052563	D930048N14Rik	-1.89095	0.000195414	KO_down
ENSMUSG00000024575	Pde6a	-1.88991	0.0208291	KO_down
ENSMUSG00000000531	Tamalin	-1.88716	2.75787e-34	KO_down
ENSMUSG00000002006	Pdzd4	-1.88594	0.0167304	KO_down
ENSMUSG00000022218	Tgm1	-1.88468	1.15217e-05	KO_down
ENSMUSG00000042035	Igsf3	-1.88046	3.34715e-134	KO_down
ENSMUSG00000037902	Sirpa	-1.87984	7.76144e-28	KO_down
ENSMUSG00000038576	Susd4	-1.87927	9.40513e-22	KO_down
ENSMUSG00000046854	Pip5kl1	-1.87927	0.016896	KO_down
ENSMUSG00000019831	Wasf1	-1.87921	1.86594e-32	KO_down
ENSMUSG00000042404	Dennd4b	-1.87421	3.06846e-23	KO_down
ENSMUSG00000030584	Dpf1	-1.86798	1.06123e-15	KO_down
ENSMUSG00000026980	Ly75	-1.86738	2.21573e-83	KO_down
ENSMUSG00000022900	Ildr1	-1.86492	8.47809e-41	KO_down
ENSMUSG00000027378	Nphp1	-1.86466	2.09361e-14	KO_down
ENSMUSG00000027078	Ube2l6	-1.86324	1.92075e-05	KO_down
ENSMUSG00000071531	Gprin2	-1.86298	0.00836069	KO_down
ENSMUSG00000038677	Scube3	-1.86099	8.59329e-41	KO_down
ENSMUSG00000020684	Rasl10b	-1.86013	0.0055333	KO_down
ENSMUSG00000022221	Ripk3	-1.85883	0.00100324	KO_down
ENSMUSG00000028978	Nos3	-1.85607	0.0224686	KO_down
ENSMUSG00000047586	Nccrp1	-1.85558	0.00190914	KO_down
ENSMUSG00000089989	Gm45713	-1.85447	0.000357476	KO_down
ENSMUSG00000027375	Mal	-1.85044	5.62718e-05	KO_down
ENSMUSG00000002059	Rab34	-1.85033	1.2491e-07	KO_down
ENSMUSG00000028444	Cntfr	-1.84828	2.32118e-06	KO_down
ENSMUSG00000033826	Dnah8	-1.8478	1.23279e-28	KO_down
ENSMUSG00000054452	Tle5	-1.84761	1.47141e-181	KO_down
ENSMUSG00000026380	Tfcp2l1	-1.84491	0	KO_down
ENSMUSG00000025588	Nat1	-1.84415	0.00262613	KO_down
ENSMUSG00000058669	Nkx2-9	-1.84342	0.00500128	KO_down
ENSMUSG00000038623	Tm6sf1	-1.84126	2.60668e-05	KO_down
ENSMUSG00000022272	Myo10	-1.841	8.74638e-191	KO_down
ENSMUSG00000041329	Atp1b2	-1.83876	6.71458e-95	KO_down
ENSMUSG00000090600	NA	-1.83806	0.00811094	KO_down
ENSMUSG00000006575	Rundc3a	-1.83727	1.52088e-16	KO_down
ENSMUSG00000040693	Slco4c1	-1.83662	8.22336e-09	KO_down
ENSMUSG00000064147	Rab44	-1.83635	0.0108363	KO_down
ENSMUSG00000074071	Fam169b	-1.83583	8.50494e-16	KO_down
ENSMUSG00000031297	Slc7a3	-1.83582	7.92044e-05	KO_down
ENSMUSG00000062031	Pgghg	-1.83495	1.08685e-12	KO_down
ENSMUSG00000031489	Adrb3	-1.83043	2.52238e-10	KO_down
ENSMUSG00000032607	Amt	-1.82937	7.33293e-101	KO_down
ENSMUSG00000055148	Klf2	-1.82663	7.63051e-148	KO_down
ENSMUSG00000054387	Mdm4	-1.82574	6.76293e-170	KO_down
ENSMUSG00000049604	Hoxb13	-1.82463	0.00101669	KO_down
ENSMUSG00000024986	Hhex	-1.82399	8.28908e-08	KO_down
ENSMUSG00000034226	Rhov	-1.82269	9.42908e-07	KO_down
ENSMUSG00000026831	1700007K13Rik	-1.82099	1.90915e-25	KO_down
ENSMUSG00000028417	Tal2	-1.82084	0.0396439	KO_down
ENSMUSG00000074796	Slc4a11	-1.8208	3.08981e-38	KO_down
ENSMUSG00000010066	Cacna2d2	-1.82003	4.22935e-05	KO_down
ENSMUSG00000035513	Ntng2	-1.81838	0.031021	KO_down
ENSMUSG00000074653	Lrrc31	-1.81797	1.02092e-07	KO_down
ENSMUSG00000058254	Tspan7	-1.81768	1.30992e-06	KO_down
ENSMUSG00000031155	Pim2	-1.8157	7.78309e-22	KO_down
ENSMUSG00000024300	Myo1f	-1.81324	0.000918268	KO_down
ENSMUSG00000045532	C1ql1	-1.81275	0.00267956	KO_down
ENSMUSG00000089704	Galnt2	-1.80932	2.42526e-05	KO_down
ENSMUSG00000040618	Pck2	-1.80817	2.61153e-36	KO_down
ENSMUSG00000049907	Rasl11b	-1.80214	8.59714e-12	KO_down
ENSMUSG00000020077	Srgn	-1.80156	4.08907e-05	KO_down
ENSMUSG00000032174	Icam5	-1.80133	1.05858e-10	KO_down
ENSMUSG00000074272	Ceacam1	-1.80127	6.91365e-15	KO_down
ENSMUSG00000040606	Kazn	-1.79998	1.81297e-107	KO_down
ENSMUSG00000034796	Cpne7	-1.79162	8.88874e-07	KO_down
ENSMUSG00000078607	1810010H24Rik	-1.7912	8.07801e-05	KO_down
ENSMUSG00000040430	Pitpnc1	-1.79097	7.00746e-43	KO_down
ENSMUSG00000018566	Slc2a4	-1.79073	1.00857e-06	KO_down
ENSMUSG00000037627	Rgs22	-1.78624	0.0101877	KO_down
ENSMUSG00000021313	Ryr2	-1.78511	9.21176e-15	KO_down
ENSMUSG00000048216	Gpr85	-1.78313	0.00194805	KO_down
ENSMUSG00000050382	Kif7	-1.78043	1.21833e-13	KO_down
ENSMUSG00000028072	Ntrk1	-1.77917	0.000409874	KO_down
ENSMUSG00000019891	Dcbld1	-1.77837	1.9448e-27	KO_down
ENSMUSG00000035413	Tmem98	-1.77711	6.14673e-06	KO_down
ENSMUSG00000032640	Chsy1	-1.77451	2.69375e-32	KO_down
ENSMUSG00000022206	Npr3	-1.7713	2.3932e-07	KO_down
ENSMUSG00000020262	Adarb1	-1.7703	2.89467e-15	KO_down
ENSMUSG00000027702	Lrrc34	-1.77004	1.62034e-12	KO_down
ENSMUSG00000018169	Mfng	-1.76866	9.01008e-07	KO_down
ENSMUSG00000019139	Isyna1	-1.76802	6.03199e-80	KO_down
ENSMUSG00000026829	Gbgt1	-1.76741	0.00510338	KO_down
ENSMUSG00000028456	Unc13b	-1.76697	1.1593e-64	KO_down
ENSMUSG00000020000	Moxd1	-1.76574	0.000833043	KO_down
ENSMUSG00000039720	Got1l1	-1.76562	6.72226e-21	KO_down
ENSMUSG00000010830	Kdelr3	-1.76553	4.53614e-18	KO_down
ENSMUSG00000055102	Zfp819	-1.7638	0.013302	KO_down
ENSMUSG00000027995	Tlr2	-1.76371	2.54498e-08	KO_down
ENSMUSG00000056529	Ptafr	-1.76205	0.00116125	KO_down
ENSMUSG00000001663	Gstt1	-1.76173	7.75884e-06	KO_down
ENSMUSG00000051243	Islr2	-1.76163	0.000215434	KO_down
ENSMUSG00000054263	Lifr	-1.76152	4.18962e-47	KO_down
ENSMUSG00000034607	Pof1b	-1.76078	0.00266967	KO_down
ENSMUSG00000032807	Alox12b	-1.75931	0.0055333	KO_down
ENSMUSG00000081683	Fzd10	-1.75823	0.005725	KO_down
ENSMUSG00000039911	Spsb1	-1.75742	1.86932e-23	KO_down
ENSMUSG00000075602	Ly6a	-1.75561	1.98744e-26	KO_down
ENSMUSG00000031736	Crnde	-1.7554	0.00127698	KO_down
ENSMUSG00000001288	Rarg	-1.75459	3.41458e-42	KO_down
ENSMUSG00000087042	Gm11611	-1.75362	1.81237e-06	KO_down
ENSMUSG00000068923	Syt11	-1.75345	2.17128e-07	KO_down
ENSMUSG00000024578	Il17b	-1.75212	0.0112989	KO_down
ENSMUSG00000034282	Evpl	-1.7518	3.54356e-08	KO_down
ENSMUSG00000090290	Tarbp1	-1.75087	5.604e-13	KO_down
ENSMUSG00000026890	Lhx6	-1.74951	0.0153738	KO_down
ENSMUSG00000042210	Abhd14a	-1.74848	1.88827e-15	KO_down
ENSMUSG00000032332	Col12a1	-1.74717	0.0095754	KO_down
ENSMUSG00000023995	Tspo2	-1.74617	0.000155634	KO_down
ENSMUSG00000038172	Ttc39b	-1.74397	9.45232e-41	KO_down
ENSMUSG00000014782	Plekhg4	-1.74349	4.11502e-06	KO_down
ENSMUSG00000002602	Axl	-1.74148	0.00945753	KO_down
ENSMUSG00000053198	Prx	-1.73822	6.3615e-09	KO_down
ENSMUSG00000045896	Paip2b	-1.7379	2.30134e-103	KO_down
ENSMUSG00000062044	Lmtk3	-1.73756	7.27516e-12	KO_down
ENSMUSG00000037907	Ankrd13b	-1.73714	1.28955e-06	KO_down
ENSMUSG00000009876	Cox4i2	-1.73592	0.000439464	KO_down
ENSMUSG00000070424	Art5	-1.73586	0.00758166	KO_down
ENSMUSG00000071658	Gng3	-1.73555	0.00298014	KO_down
ENSMUSG00000041544	Disp3	-1.73193	0.00627055	KO_down
ENSMUSG00000020469	Myl7	-1.73177	2.22496e-05	KO_down
ENSMUSG00000033705	Stard9	-1.72829	1.37489e-28	KO_down
ENSMUSG00000031791	Tmem38a	-1.72804	1.91924e-20	KO_down
ENSMUSG00000005370	Msh6	-1.7224	0	KO_down
ENSMUSG00000039787	Cercam	-1.72185	7.91252e-24	KO_down
ENSMUSG00000033624	Pdpr	-1.71825	3.03696e-32	KO_down
ENSMUSG00000034845	Plvap	-1.71812	0.00548696	KO_down
ENSMUSG00000018427	Ypel2	-1.71657	1.21337e-46	KO_down
ENSMUSG00000015850	Adamtsl4	-1.71627	8.30628e-14	KO_down
ENSMUSG00000015957	Wnt11	-1.7157	0.0154306	KO_down
ENSMUSG00000062960	Kdr	-1.7151	0.00588412	KO_down
ENSMUSG00000038594	Cep85l	-1.7147	0.000634882	KO_down
ENSMUSG00000026811	St6galnac6	-1.71288	3.58569e-34	KO_down
ENSMUSG00000028064	Sema4a	-1.71127	5.05518e-05	KO_down
ENSMUSG00000025216	Lbx1	-1.70713	0.0271538	KO_down
ENSMUSG00000027603	Ggt7	-1.70567	0.000187577	KO_down
ENSMUSG00000030806	Stx1b	-1.70528	1.14205e-06	KO_down
ENSMUSG00000043614	Vps37d	-1.70424	3.10353e-06	KO_down
ENSMUSG00000024769	Cdc42bpg	-1.70256	6.90081e-90	KO_down
ENSMUSG00000027327	1700037H04Rik	-1.70168	5.67592e-75	KO_down
ENSMUSG00000025486	Sirt3	-1.70025	1.63827e-16	KO_down
ENSMUSG00000053877	Srcap	-1.69967	8.63419e-40	KO_down
ENSMUSG00000040998	Npnt	-1.69956	1.87631e-17	KO_down
ENSMUSG00000026479	Lamc2	-1.6969	1.39679e-31	KO_down
ENSMUSG00000075511	1700001L05Rik	-1.69676	2.08219e-20	KO_down
ENSMUSG00000071398	2410004P03Rik	-1.6948	0.0257285	KO_down
ENSMUSG00000032076	Cadm1	-1.6927	5.06766e-52	KO_down
ENSMUSG00000021268	Meg3	-1.69155	4.35719e-83	KO_down
ENSMUSG00000052374	Actn2	-1.68825	1.26588e-29	KO_down
ENSMUSG00000037172	Dennd11	-1.68647	1.54922e-07	KO_down
ENSMUSG00000086615	NA	-1.68596	0.00680709	KO_down
ENSMUSG00000087169	NA	-1.68532	0.0315954	KO_down
ENSMUSG00000023034	Nr4a1	-1.68437	3.81789e-20	KO_down
ENSMUSG00000005045	Chd5	-1.68237	4.87026e-11	KO_down
ENSMUSG00000005533	Igf1r	-1.68131	3.66748e-17	KO_down
ENSMUSG00000029178	Klf3	-1.68097	1.71905e-53	KO_down
ENSMUSG00000028758	Kif17	-1.68026	0.000490807	KO_down
ENSMUSG00000020363	Gfpt2	-1.6799	1.71812e-22	KO_down
ENSMUSG00000032198	Dock6	-1.67796	1.71309e-246	KO_down
ENSMUSG00000059895	Ptp4a3	-1.67516	1.05126e-51	KO_down
ENSMUSG00000068522	Aard	-1.67403	6.02481e-20	KO_down
ENSMUSG00000032611	1700102P08Rik	-1.67182	0.0566735	No_Change
ENSMUSG00000023266	Frs3	-1.67152	2.05182e-15	KO_down
ENSMUSG00000023403	Stk31	-1.66558	4.18345e-22	KO_down
ENSMUSG00000026117	Zap70	-1.66505	1.61244e-08	KO_down
ENSMUSG00000028068	Iqgap3	-1.66364	8.65915e-99	KO_down
ENSMUSG00000066036	Ubr4	-1.6636	0	KO_down
ENSMUSG00000026335	Pam	-1.66158	1.23287e-25	KO_down
ENSMUSG00000022099	Dmtn	-1.66109	7.49378e-10	KO_down
ENSMUSG00000030088	Aldh1l1	-1.66057	2.07199e-21	KO_down
ENSMUSG00000026173	Plcd4	-1.66042	0.00101569	KO_down
ENSMUSG00000024736	Tmem132a	-1.65883	2.08705e-20	KO_down
ENSMUSG00000090536	NA	-1.65825	0.00964157	KO_down
ENSMUSG00000035275	Raver2	-1.65676	3.54461e-36	KO_down
ENSMUSG00000020220	Vps13d	-1.65664	1.78594e-70	KO_down
ENSMUSG00000027860	Vangl1	-1.65616	7.43832e-37	KO_down
ENSMUSG00000072640	Lyrm9	-1.65554	1.40584e-21	KO_down
ENSMUSG00000034205	Loxl2	-1.65264	8.65899e-21	KO_down
ENSMUSG00000091586	Cyp4f17	-1.65244	1.06792e-11	KO_down
ENSMUSG00000073295	Nudt11	-1.64916	2.30074e-06	KO_down
ENSMUSG00000021913	Ogdhl	-1.64904	9.84204e-110	KO_down
ENSMUSG00000011751	Sptbn4	-1.6475	2.46451e-30	KO_down
ENSMUSG00000002847	Pla1a	-1.64731	2.12989e-05	KO_down
ENSMUSG00000059991	Nptx2	-1.64489	1.96051e-17	KO_down
ENSMUSG00000072966	Gprasp2	-1.64486	1.65446e-17	KO_down
ENSMUSG00000028109	Hormad1	-1.64163	2.28215e-15	KO_down
ENSMUSG00000031442	Mcf2l	-1.64147	6.32432e-08	KO_down
ENSMUSG00000044005	Gls2	-1.64126	2.56041e-19	KO_down
ENSMUSG00000024177	Nme4	-1.64042	2.76793e-34	KO_down
ENSMUSG00000083068	Gm11800	-1.6387	0.000157643	KO_down
ENSMUSG00000027784	Ppm1l	-1.63806	1.22047e-10	KO_down
ENSMUSG00000047412	Zbtb44	-1.63792	2.24774e-159	KO_down
ENSMUSG00000003032	Klf4	-1.63476	5.8233e-119	KO_down
ENSMUSG00000025481	Urah	-1.63474	1.78197e-06	KO_down
ENSMUSG00000057337	Chst3	-1.63247	1.3609e-05	KO_down
ENSMUSG00000027597	Ahcy	-1.63114	1.96366e-164	KO_down
ENSMUSG00000038651	Sycp2l	-1.627	0.000485189	KO_down
ENSMUSG00000035112	Wnk4	-1.62311	0.00170592	KO_down
ENSMUSG00000091973	NA	-1.62252	0.0350941	KO_down
ENSMUSG00000036718	Micall2	-1.62224	1.09501e-24	KO_down
ENSMUSG00000045103	Dmd	-1.62196	6.20824e-28	KO_down
ENSMUSG00000026463	Atp2b4	-1.62037	1.08031e-72	KO_down
ENSMUSG00000020961	Ston2	-1.61993	4.5668e-19	KO_down
ENSMUSG00000068740	Celsr2	-1.61838	7.41387e-10	KO_down
ENSMUSG00000026791	Slc2a8	-1.61789	3.5015e-27	KO_down
ENSMUSG00000022454	Nell2	-1.61618	0.00214177	KO_down
ENSMUSG00000059022	Kcp	-1.61611	8.93397e-05	KO_down
ENSMUSG00000015224	Cyp2j9	-1.6159	0.0413535	KO_down
ENSMUSG00000035936	Aldh5a1	-1.61538	3.37136e-23	KO_down
ENSMUSG00000092837	Rpph1	-1.61515	0.000320962	KO_down
ENSMUSG00000006720	Zfp184	-1.61401	1.14844e-15	KO_down
ENSMUSG00000078706	Gm53	-1.61344	8.77538e-17	KO_down
ENSMUSG00000061356	Nuggc	-1.61232	0.017098	KO_down
ENSMUSG00000000223	Drp2	-1.6116	5.20354e-07	KO_down
ENSMUSG00000073652	Apol7d	-1.61127	0.000203272	KO_down
ENSMUSG00000062380	Tubb3	-1.61025	2.94904e-11	KO_down
ENSMUSG00000032269	Htr3a	-1.60969	0.0227925	KO_down
ENSMUSG00000042826	Fgf11	-1.60774	4.62511e-05	KO_down
ENSMUSG00000067144	Slc22a7	-1.6073	0.00117081	KO_down
ENSMUSG00000018570	2810408A11Rik	-1.605	6.7838e-05	KO_down
ENSMUSG00000028163	Nfkb1	-1.60384	3.70997e-14	KO_down
ENSMUSG00000028487	Bnc2	-1.60266	0.00819335	KO_down
ENSMUSG00000046318	Ccbe1	-1.60176	0.042095	KO_down
ENSMUSG00000027239	Mdk	-1.60105	5.11915e-85	KO_down
ENSMUSG00000020437	Myo1g	-1.60082	5.88348e-05	KO_down
ENSMUSG00000006930	Hap1	-1.60006	8.00093e-28	KO_down
ENSMUSG00000027985	Lef1	-1.59828	0.0262454	KO_down
ENSMUSG00000006469	Slc34a3	-1.59738	0.0149549	KO_down
ENSMUSG00000090399	NA	-1.59671	0.000133848	KO_down
ENSMUSG00000030268	Bcat1	-1.59464	4.87259e-294	KO_down
ENSMUSG00000005373	Mlxipl	-1.59306	7.89294e-20	KO_down
ENSMUSG00000035000	Dpp4	-1.5929	2.08265e-07	KO_down
ENSMUSG00000028927	Padi2	-1.59113	5.62363e-15	KO_down
ENSMUSG00000066319	Rtp3	-1.58928	0.0265962	KO_down
ENSMUSG00000020396	Nefh	-1.58866	1.60608e-06	KO_down
ENSMUSG00000053141	Ptprt	-1.58737	0.0373615	KO_down
ENSMUSG00000029570	Lfng	-1.58705	0.0427136	KO_down
ENSMUSG00000053310	Nrgn	-1.58583	0.000440363	KO_down
ENSMUSG00000034520	Gjc1	-1.58363	5.84749e-15	KO_down
ENSMUSG00000042251	Pm20d1	-1.58322	2.03966e-12	KO_down
ENSMUSG00000068744	Psrc1	-1.58286	1.09922e-70	KO_down
ENSMUSG00000022389	Tef	-1.58284	2.32888e-49	KO_down
ENSMUSG00000022435	Upk3a	-1.57975	0.0428024	KO_down
ENSMUSG00000029478	Ncor2	-1.57814	2.33754e-152	KO_down
ENSMUSG00000013076	Amotl1	-1.57709	2.32596e-33	KO_down
ENSMUSG00000068860	Gm128	-1.57683	0.000696867	KO_down
ENSMUSG00000021589	Rhobtb3	-1.57353	5.27607e-16	KO_down
ENSMUSG00000055809	Dnaaf3	-1.57182	1.27468e-10	KO_down
ENSMUSG00000074825	Itpripl1	-1.57119	3.22504e-06	KO_down
ENSMUSG00000086321	Gm11413	-1.57081	0.0107097	KO_down
ENSMUSG00000031910	Has3	-1.5693	0.0103345	KO_down
ENSMUSG00000075555	Gm10863	-1.56505	0.0331349	KO_down
ENSMUSG00000038059	Smim3	-1.56114	0.0296798	KO_down
ENSMUSG00000046636	Gm7729	-1.56069	0.00396767	KO_down
ENSMUSG00000092273	NA	-1.56067	0.0504782	No_Change
ENSMUSG00000027330	Cdc25b	-1.55992	1.21487e-22	KO_down
ENSMUSG00000092052	NA	-1.55924	1.55637e-06	KO_down
ENSMUSG00000039004	Bmp6	-1.55732	0.000649364	KO_down
ENSMUSG00000043621	Ubxn10	-1.55593	0.00293222	KO_down
ENSMUSG00000029718	Pcolce	-1.55487	5.92371e-26	KO_down
ENSMUSG00000020799	Tekt1	-1.55378	3.32045e-05	KO_down
ENSMUSG00000071636	Rimbp3	-1.55335	0.00928585	KO_down
ENSMUSG00000027359	Slc27a2	-1.55255	0.000126951	KO_down
ENSMUSG00000038242	Aox4	-1.55255	0.000353898	KO_down
ENSMUSG00000073771	Btbd19	-1.55228	3.07825e-17	KO_down
ENSMUSG00000001555	Fkbp10	-1.55209	0.000966361	KO_down
ENSMUSG00000030491	Tdrd12	-1.55202	0.00230474	KO_down
ENSMUSG00000030605	Mfge8	-1.54985	0	KO_down
ENSMUSG00000027377	Mall	-1.54748	0.00549574	KO_down
ENSMUSG00000080316	Spaca6	-1.54687	6.83277e-05	KO_down
ENSMUSG00000000628	Hk2	-1.54578	7.51372e-301	KO_down
ENSMUSG00000048138	Dmrt2	-1.54187	0.00390518	KO_down
ENSMUSG00000030930	Chst15	-1.54174	0.000211691	KO_down
ENSMUSG00000024070	Prkd3	-1.54115	1.2455e-19	KO_down
ENSMUSG00000069072	Slc7a14	-1.54002	0.0454582	KO_down
ENSMUSG00000048087	Gm4737	-1.5393	2.15029e-57	KO_down
ENSMUSG00000050671	Ism2	-1.53849	1.44671e-05	KO_down
ENSMUSG00000020032	Nuak1	-1.53755	1.22205e-31	KO_down
ENSMUSG00000032267	Usp28	-1.53438	1.7618e-105	KO_down
ENSMUSG00000058550	Dppa4	-1.53224	4.58961e-51	KO_down
ENSMUSG00000028488	Sh3gl2	-1.52968	0.0213569	KO_down
ENSMUSG00000079681	Zglp1	-1.52901	0.001335	KO_down
ENSMUSG00000049577	Zfpm1	-1.52891	4.12647e-45	KO_down
ENSMUSG00000034109	Golim4	-1.52888	1.03498e-08	KO_down
ENSMUSG00000051790	Nlgn2	-1.52872	3.08223e-13	KO_down
ENSMUSG00000031561	Tenm3	-1.52741	5.36131e-10	KO_down
ENSMUSG00000028541	B4galt2	-1.5268	6.66789e-07	KO_down
ENSMUSG00000018752	Tnfsfm13	-1.52615	1.08178e-10	KO_down
ENSMUSG00000051811	Cox6b2	-1.52517	3.52998e-30	KO_down
ENSMUSG00000054150	Syne3	-1.52432	3.72432e-07	KO_down
ENSMUSG00000060703	Cd302	-1.52251	1.20707e-05	KO_down
ENSMUSG00000038764	Ptpn3	-1.52034	3.5497e-28	KO_down
ENSMUSG00000020227	Irak3	-1.51952	0.000211691	KO_down
ENSMUSG00000032528	Vipr1	-1.51912	0.0414192	KO_down
ENSMUSG00000074281	Gm12522	-1.51912	0.0414192	KO_down
ENSMUSG00000000706	Btn1a1	-1.51899	0.0235	KO_down
ENSMUSG00000087030	Gm16143	-1.5187	0.000613171	KO_down
ENSMUSG00000046314	Stxbp6	-1.5174	0.041906	KO_down
ENSMUSG00000028943	Espn	-1.51662	5.66974e-25	KO_down
ENSMUSG00000029759	Pon3	-1.51366	0.0176221	KO_down
ENSMUSG00000030393	Zik1	-1.51362	2.71275e-09	KO_down
ENSMUSG00000031137	Fgf13	-1.51303	0.00572297	KO_down
ENSMUSG00000042988	Notum	-1.51279	0.0130031	KO_down
ENSMUSG00000020029	Nudt4	-1.51272	3.34557e-263	KO_down
ENSMUSG00000026478	Lamc1	-1.51001	0	KO_down
ENSMUSG00000021950	Anxa8	-1.50927	3.62387e-12	KO_down
ENSMUSG00000058589	Anks1b	-1.50837	0.0476145	KO_down
ENSMUSG00000037706	Cd81	-1.5066	2.90871e-147	KO_down
ENSMUSG00000026447	Pik3c2b	-1.50628	1.42587e-36	KO_down
ENSMUSG00000027408	Cpxm1	-1.50472	4.47233e-13	KO_down
ENSMUSG00000034768	Asb16	-1.50431	0.000606637	KO_down
ENSMUSG00000084919	Ptprtos	-1.50374	9.9023e-13	KO_down
ENSMUSG00000015217	Hmgb3	-1.50371	3.13871e-17	KO_down
ENSMUSG00000042532	Golga7b	-1.50341	0.0593965	No_Change
ENSMUSG00000024620	Pdgfrb	-1.50229	5.4267e-16	KO_down
ENSMUSG00000086276	NA	-1.50017	1.45889e-08	KO_down
ENSMUSG00000084408	Gm11870	-1.49957	0.0195715	KO_down
ENSMUSG00000072720	Myo18b	-1.49891	3.77967e-05	KO_down
ENSMUSG00000019769	NA	-1.49873	1.19684e-11	KO_down
ENSMUSG00000058297	Spock2	-1.49846	1.09354e-29	KO_down
ENSMUSG00000030306	Tmtc1	-1.4951	4.99271e-06	KO_down
ENSMUSG00000055320	Tead1	-1.4924	5.08722e-74	KO_down
ENSMUSG00000068115	Ninl	-1.49143	1.26458e-34	KO_down
ENSMUSG00000032333	Stoml1	-1.49118	1.71e-16	KO_down
ENSMUSG00000092939	NA	-1.48931	0.0193223	KO_down
ENSMUSG00000039693	Msantd3	-1.4893	1.43782e-13	KO_down
ENSMUSG00000001910	Nacc1	-1.48804	7.85985e-106	KO_down
ENSMUSG00000024409	Psors1c2	-1.48528	0.0489863	KO_down
ENSMUSG00000021747	Cfap20dc	-1.48067	1.18353e-28	KO_down
ENSMUSG00000033083	Tbc1d4	-1.47947	9.98072e-06	KO_down
ENSMUSG00000061517	Sox21	-1.47928	6.25289e-13	KO_down
ENSMUSG00000018593	Sparc	-1.47818	1.02201e-234	KO_down
ENSMUSG00000040812	Agbl2	-1.47718	0.0119142	KO_down
ENSMUSG00000081752	Sms-ps	-1.47658	0.0347784	KO_down
ENSMUSG00000070708	Gtsf1l	-1.47621	3.36681e-07	KO_down
ENSMUSG00000021767	Kat6b	-1.47397	1.47751e-115	KO_down
ENSMUSG00000020593	Lpin1	-1.4733	3.438e-52	KO_down
ENSMUSG00000052544	St6galnac3	-1.47213	0.0051096	KO_down
ENSMUSG00000038644	Pold1	-1.47179	1.62101e-135	KO_down
ENSMUSG00000025876	Unc5a	-1.47145	0.00182942	KO_down
ENSMUSG00000043913	Ccdc60	-1.4706	0.0542339	No_Change
ENSMUSG00000021732	Fgf10	-1.46991	0.000290125	KO_down
ENSMUSG00000042401	Crtac1	-1.46895	2.74553e-07	KO_down
ENSMUSG00000037012	Hk1	-1.46779	1.20813e-214	KO_down
ENSMUSG00000022661	Cd200	-1.46726	0.000252709	KO_down
ENSMUSG00000029376	Mthfd2l	-1.46534	0.0502025	No_Change
ENSMUSG00000030672	Mylpf	-1.46384	2.96398e-21	KO_down
ENSMUSG00000023047	Amhr2	-1.46224	2.6892e-05	KO_down
ENSMUSG00000020067	Mypn	-1.46105	7.92888e-17	KO_down
ENSMUSG00000026944	Abca2	-1.46086	5.44768e-28	KO_down
ENSMUSG00000056486	Chn1	-1.46063	8.67491e-19	KO_down
ENSMUSG00000032735	Ablim3	-1.46062	0.0456322	KO_down
ENSMUSG00000026556	Vangl2	-1.46045	3.90996e-28	KO_down
ENSMUSG00000037455	Slc18b1	-1.46013	0.000184484	KO_down
ENSMUSG00000032769	Trpa1	-1.46009	0.0165803	KO_down
ENSMUSG00000069170	Adgrv1	-1.4564	1.37526e-05	KO_down
ENSMUSG00000043999	Gpr75	-1.45527	0.0505806	No_Change
ENSMUSG00000033904	Ccp110	-1.45519	5.31645e-53	KO_down
ENSMUSG00000038393	Txnip	-1.45509	0	KO_down
ENSMUSG00000026131	Dst	-1.45491	2.59765e-203	KO_down
ENSMUSG00000001761	Smo	-1.45438	4.96654e-14	KO_down
ENSMUSG00000020228	Helb	-1.45437	3.25433e-42	KO_down
ENSMUSG00000041718	Alg13	-1.45395	1.72994e-150	KO_down
ENSMUSG00000026114	Cnga3	-1.45321	2.01621e-09	KO_down
ENSMUSG00000024501	Dpysl3	-1.45286	6.29974e-12	KO_down
ENSMUSG00000028649	Macf1	-1.45151	0	KO_down
ENSMUSG00000004948	Zp3	-1.45132	0.010576	KO_down
ENSMUSG00000054619	Mettl7a1	-1.45117	1.10166e-09	KO_down
ENSMUSG00000030255	Sspn	-1.44831	0.0468178	KO_down
ENSMUSG00000005973	Rcn1	-1.44739	8.32203e-39	KO_down
ENSMUSG00000024883	Rin1	-1.4473	5.79177e-10	KO_down
ENSMUSG00000034037	Fgd5	-1.44704	6.25828e-06	KO_down
ENSMUSG00000029001	Fbxo44	-1.4468	4.10599e-05	KO_down
ENSMUSG00000038967	Pdk2	-1.44673	2.82942e-08	KO_down
ENSMUSG00000048058	Ldlrad3	-1.44619	8.97862e-32	KO_down
ENSMUSG00000008035	Mid1ip1	-1.44439	2.83805e-07	KO_down
ENSMUSG00000028289	Epha7	-1.44427	3.2942e-05	KO_down
ENSMUSG00000020042	Btbd11	-1.44402	9.22067e-11	KO_down
ENSMUSG00000090621	NA	-1.44324	0.00136638	KO_down
ENSMUSG00000024268	Celf4	-1.44276	0.00311714	KO_down
ENSMUSG00000006731	B4galnt1	-1.44094	3.22773e-07	KO_down
ENSMUSG00000054477	Kcnn2	-1.44061	2.69945e-05	KO_down
ENSMUSG00000027242	Wdr76	-1.44004	1.2343e-85	KO_down
ENSMUSG00000039676	Capsl	-1.43987	0.000104732	KO_down
ENSMUSG00000033060	Lmo7	-1.43979	3.07174e-51	KO_down
ENSMUSG00000022994	Adcy6	-1.43853	0.0011322	KO_down
ENSMUSG00000010362	Rdm1	-1.43775	8.42283e-27	KO_down
ENSMUSG00000035697	Arhgap45	-1.43531	1.68104e-13	KO_down
ENSMUSG00000090363	Gm3512	-1.43443	0.055198	No_Change
ENSMUSG00000002668	Dennd1c	-1.4341	0.00370968	KO_down
ENSMUSG00000022463	Srebf2	-1.43384	1.4195e-141	KO_down
ENSMUSG00000022790	Igsf11	-1.43358	0.0297877	KO_down
ENSMUSG00000029246	Ppat	-1.43298	2.25196e-78	KO_down
ENSMUSG00000036598	Ccdc113	-1.4325	0.000466014	KO_down
ENSMUSG00000051747	Ttn	-1.43126	4.23037e-08	KO_down
ENSMUSG00000026409	Pfkfb2	-1.43032	2.97888e-23	KO_down
ENSMUSG00000011267	Zfp296	-1.43028	4.42844e-15	KO_down
ENSMUSG00000074305	Peak1	-1.42886	1.09193e-31	KO_down
ENSMUSG00000018740	Slc25a35	-1.42816	0.000118441	KO_down
ENSMUSG00000054057	A930004D18Rik	-1.4281	0.014106	KO_down
ENSMUSG00000041556	Fbxo2	-1.42783	6.3119e-16	KO_down
ENSMUSG00000057897	Camk2b	-1.42657	1.264e-19	KO_down
ENSMUSG00000035458	Tnni3	-1.4257	0.00161846	KO_down
ENSMUSG00000087455	5330411J11Rik	-1.42561	0.0329883	KO_down
ENSMUSG00000035239	Neu3	-1.42397	6.7446e-13	KO_down
ENSMUSG00000023845	Lnpep	-1.42332	6.87863e-29	KO_down
ENSMUSG00000030087	Klf15	-1.42303	1.3023e-13	KO_down
ENSMUSG00000031529	Tnks	-1.42278	5.22485e-96	KO_down
ENSMUSG00000038777	Sema6c	-1.41874	2.114e-13	KO_down
ENSMUSG00000049742	NA	-1.4182	0.0223253	KO_down
ENSMUSG00000062542	Syt9	-1.41785	3.07487e-26	KO_down
ENSMUSG00000050192	Eif5a2	-1.41776	1.8092e-20	KO_down
ENSMUSG00000040247	Tbc1d10c	-1.41741	0.0129855	KO_down
ENSMUSG00000017756	Slc12a7	-1.41638	1.06425e-218	KO_down
ENSMUSG00000001227	Sema6b	-1.41473	2.8353e-05	KO_down
ENSMUSG00000028664	Ephb2	-1.41436	3.3427e-21	KO_down
ENSMUSG00000034675	Dbn1	-1.41384	0.000106021	KO_down
ENSMUSG00000036395	Glb1l2	-1.41281	3.6834e-05	KO_down
ENSMUSG00000025515	Muc2	-1.41241	0.000561153	KO_down
ENSMUSG00000062198	2700097O09Rik	-1.411	2.17396e-31	KO_down
ENSMUSG00000036504	Phpt1	-1.41029	6.65241e-05	KO_down
ENSMUSG00000034557	Zfyve9	-1.40938	3.60388e-15	KO_down
ENSMUSG00000033364	Usp37	-1.40936	9.42556e-156	KO_down
ENSMUSG00000082762	Gm12366	-1.40904	0.0456893	KO_down
ENSMUSG00000047986	Palm3	-1.40799	1.67871e-26	KO_down
ENSMUSG00000032558	Nphp3	-1.40602	7.73626e-25	KO_down
ENSMUSG00000045912	C2cd4c	-1.40585	0.0253642	KO_down
ENSMUSG00000056458	Mok	-1.4052	3.87212e-21	KO_down
ENSMUSG00000052812	Atad2b	-1.40471	1.73235e-41	KO_down
ENSMUSG00000016346	Kcnq2	-1.40444	0.0253642	KO_down
ENSMUSG00000047090	Tmem198b	-1.40418	8.59372e-06	KO_down
ENSMUSG00000038886	Man2a2	-1.40185	2.05034e-24	KO_down
ENSMUSG00000030283	St8sia1	-1.40112	1.98225e-14	KO_down
ENSMUSG00000031558	Slit2	-1.39883	1.01987e-07	KO_down
ENSMUSG00000050106	Tmc8	-1.39876	1.27298e-06	KO_down
ENSMUSG00000006800	Sulf2	-1.39769	4.74259e-97	KO_down
ENSMUSG00000070802	Pnmal2	-1.39764	0.00668934	KO_down
ENSMUSG00000026674	Ddr2	-1.3974	2.89873e-22	KO_down
ENSMUSG00000030830	Itgal	-1.3962	0.00923909	KO_down
ENSMUSG00000040717	Il17rd	-1.39556	1.76847e-14	KO_down
ENSMUSG00000018076	Med13l	-1.3942	4.44081e-117	KO_down
ENSMUSG00000024030	Abcg1	-1.39401	1.18512e-09	KO_down
ENSMUSG00000086084	NA	-1.39263	0.0419974	KO_down
ENSMUSG00000030207	Fam234b	-1.39056	8.46588e-16	KO_down
ENSMUSG00000031398	Plxna3	-1.3903	7.27775e-07	KO_down
ENSMUSG00000044719	E230025N22Rik	-1.38934	0.0423913	KO_down
ENSMUSG00000055313	Pgbd1	-1.38831	0.00858308	KO_down
ENSMUSG00000021733	Slc4a7	-1.38809	3.60911e-40	KO_down
ENSMUSG00000079012	Serpina3m	-1.38746	6.11236e-05	KO_down
ENSMUSG00000022594	Lynx1	-1.38629	0.0339445	KO_down
ENSMUSG00000019055	Plod1	-1.38547	1.34681e-27	KO_down
ENSMUSG00000024827	Gldc	-1.38366	3.64746e-157	KO_down
ENSMUSG00000092680	Snord55	-1.38345	0.00325331	KO_down
ENSMUSG00000040964	Arhgef10l	-1.38128	4.95031e-11	KO_down
ENSMUSG00000039137	Whrn	-1.38077	9.27143e-31	KO_down
ENSMUSG00000020218	Wif1	-1.38062	0.028067	KO_down
ENSMUSG00000026880	Stom	-1.38046	1.2201e-21	KO_down
ENSMUSG00000032601	Prkar2a	-1.38045	2.00862e-83	KO_down
ENSMUSG00000047139	Cd24a	-1.37958	4.37786e-15	KO_down
ENSMUSG00000019647	Sema6a	-1.37766	0.00428044	KO_down
ENSMUSG00000025001	Hells	-1.37726	5.71789e-127	KO_down
ENSMUSG00000003123	Lipe	-1.37624	1.40235e-05	KO_down
ENSMUSG00000029247	Paics	-1.37612	1.10687e-239	KO_down
ENSMUSG00000021758	Ddx4	-1.37356	2.42655e-11	KO_down
ENSMUSG00000031595	Pdgfrl	-1.37342	0.00285309	KO_down
ENSMUSG00000085137	NA	-1.37294	0.0596404	No_Change
ENSMUSG00000046337	Fam178b	-1.37286	8.44324e-17	KO_down
ENSMUSG00000038518	Jarid2	-1.37248	7.87206e-240	KO_down
ENSMUSG00000021464	Ror2	-1.37232	9.06068e-14	KO_down
ENSMUSG00000027489	Necab3	-1.37198	7.60967e-07	KO_down
ENSMUSG00000025969	Nrp2	-1.37099	2.66573e-06	KO_down
ENSMUSG00000024232	Bambi	-1.37069	3.84905e-06	KO_down
ENSMUSG00000001588	Acap1	-1.37026	0.00107708	KO_down
ENSMUSG00000067194	Eif1ax	-1.36987	1.12441e-48	KO_down
ENSMUSG00000035459	Stab2	-1.36986	0.00109956	KO_down
ENSMUSG00000035236	Scai	-1.3694	3.30716e-16	KO_down
ENSMUSG00000041112	Elmo1	-1.36819	0.000877866	KO_down
ENSMUSG00000030359	Pzp	-1.36729	0.0321994	KO_down
ENSMUSG00000073460	Pnldc1	-1.36715	2.48711e-10	KO_down
ENSMUSG00000031951	Tmem231	-1.36568	2.57022e-80	KO_down
ENSMUSG00000079364	Gm3558	-1.36481	0.00733204	KO_down
ENSMUSG00000091793	NA	-1.36396	4.79946e-49	KO_down
ENSMUSG00000034800	Zfp661	-1.36291	4.06403e-05	KO_down
ENSMUSG00000026987	Baz2b	-1.3629	8.71619e-32	KO_down
ENSMUSG00000003344	Btbd2	-1.36182	5.48862e-39	KO_down
ENSMUSG00000026728	Vim	-1.35876	5.56454e-47	KO_down
ENSMUSG00000067642	Adgrf3	-1.35876	0.0378262	KO_down
ENSMUSG00000074480	Mex3a	-1.35856	5.8127e-14	KO_down
ENSMUSG00000038526	Car14	-1.35736	0.053812	No_Change
ENSMUSG00000040850	Psme4	-1.35736	2.92846e-161	KO_down
ENSMUSG00000034032	Rpap1	-1.357	3.33904e-17	KO_down
ENSMUSG00000026274	Pask	-1.35678	4.96581e-41	KO_down
ENSMUSG00000014776	Nol3	-1.35618	0.00283637	KO_down
ENSMUSG00000046876	Atxn1	-1.35604	4.00059e-05	KO_down
ENSMUSG00000049670	Morn4	-1.35567	1.05811e-08	KO_down
ENSMUSG00000060671	Atp8b2	-1.35548	6.56797e-19	KO_down
ENSMUSG00000091395	NA	-1.35541	0.0564472	No_Change
ENSMUSG00000032777	Gtf3c1	-1.35296	8.95651e-151	KO_down
ENSMUSG00000029359	Tesc	-1.35231	0.000322533	KO_down
ENSMUSG00000025815	Dhtkd1	-1.3523	4.30884e-27	KO_down
ENSMUSG00000038612	Mcl1	-1.35219	0	KO_down
ENSMUSG00000031996	Aplp2	-1.35109	5.39942e-170	KO_down
ENSMUSG00000055874	Foxi3	-1.3509	0.000172363	KO_down
ENSMUSG00000039891	Txlnb	-1.34973	0.00501587	KO_down
ENSMUSG00000031328	Flna	-1.34869	9.65931e-174	KO_down
ENSMUSG00000021662	Arhgef28	-1.34778	0.000233195	KO_down
ENSMUSG00000032349	Elovl5	-1.34738	6.73092e-68	KO_down
ENSMUSG00000067276	Capn6	-1.34627	7.90039e-21	KO_down
ENSMUSG00000026179	Pnkd	-1.34612	2.09822e-71	KO_down
ENSMUSG00000037108	Zcwpw1	-1.34449	1.51557e-09	KO_down
ENSMUSG00000062417	NA	-1.34363	0.0601196	No_Change
ENSMUSG00000038074	Fkbp14	-1.34239	6.30364e-05	KO_down
ENSMUSG00000013629	Cad	-1.34213	1.26106e-251	KO_down
ENSMUSG00000054863	Tafa5	-1.34101	0.00361173	KO_down
ENSMUSG00000002985	Apoe	-1.34094	1.19124e-83	KO_down
ENSMUSG00000049230	Gm9833	-1.34074	4.737e-05	KO_down
ENSMUSG00000031842	Pde4c	-1.34039	0.00590928	KO_down
ENSMUSG00000036377	Cracd	-1.3402	0.00178004	KO_down
ENSMUSG00000027204	Fbn1	-1.33998	0.0145339	KO_down
ENSMUSG00000028807	Zbtb8a	-1.33989	0.000204318	KO_down
ENSMUSG00000015095	Fbxw5	-1.33967	7.82868e-13	KO_down
ENSMUSG00000051343	Rab11fip5	-1.33918	4.03007e-37	KO_down
ENSMUSG00000040495	Chrm4	-1.33896	0.0350862	KO_down
ENSMUSG00000001053	N4bp3	-1.33746	3.07932e-07	KO_down
ENSMUSG00000053024	Cntn2	-1.33658	6.28487e-08	KO_down
ENSMUSG00000038508	Gdf15	-1.33487	7.76691e-06	KO_down
ENSMUSG00000045039	Megf8	-1.33341	2.21152e-81	KO_down
ENSMUSG00000031425	Plp1	-1.33221	0.00405505	KO_down
ENSMUSG00000005917	Otx1	-1.33192	0.00223573	KO_down
ENSMUSG00000033170	Card10	-1.33165	2.62233e-09	KO_down
ENSMUSG00000028972	Car6	-1.33124	0.0398193	KO_down
ENSMUSG00000036103	Colec12	-1.33068	0.00151134	KO_down
ENSMUSG00000025529	Zfp711	-1.32931	0.0586035	No_Change
ENSMUSG00000079018	Ly6c1	-1.3277	0.036735	KO_down
ENSMUSG00000035279	Ssc5d	-1.32742	0.0162571	KO_down
ENSMUSG00000020844	Nxn	-1.32713	2.82272e-24	KO_down
ENSMUSG00000020716	Nf1	-1.32711	2.35816e-31	KO_down
ENSMUSG00000077358	Gm26293	-1.32461	0.0655681	No_Change
ENSMUSG00000084877	NA	-1.32427	9.33176e-18	KO_down
ENSMUSG00000039967	Zfp292	-1.32425	3.97771e-36	KO_down
ENSMUSG00000079388	2610042L04Rik	-1.32361	0.0565385	No_Change
ENSMUSG00000032449	Slc25a36	-1.32273	3.55106e-138	KO_down
ENSMUSG00000025389	Mip	-1.32187	0.0617644	No_Change
ENSMUSG00000087551	NA	-1.32073	0.039591	KO_down
ENSMUSG00000021611	Tert	-1.31997	2.11606e-17	KO_down
ENSMUSG00000071708	Sms	-1.31986	1.32553e-51	KO_down
ENSMUSG00000008604	Ubqln4	-1.31958	1.6517e-65	KO_down
ENSMUSG00000054008	Ndst1	-1.3195	1.43031e-18	KO_down
ENSMUSG00000038453	Srcin1	-1.31944	1.38068e-10	KO_down
ENSMUSG00000062101	Zfp119b	-1.31923	0.0375541	KO_down
ENSMUSG00000028100	Nudt17	-1.31909	3.6035e-05	KO_down
ENSMUSG00000025221	Kcnip2	-1.31907	0.0018918	KO_down
ENSMUSG00000072294	Klf12	-1.31673	0.000846415	KO_down
ENSMUSG00000037685	Atp8a1	-1.31511	1.74897e-16	KO_down
ENSMUSG00000041229	Phf8	-1.31405	1.31065e-21	KO_down
ENSMUSG00000031149	Praf2	-1.31397	2.78741e-27	KO_down
ENSMUSG00000048897	Zfp710	-1.31375	1.11369e-65	KO_down
ENSMUSG00000072566	NA	-1.31347	2.60599e-06	KO_down
ENSMUSG00000039395	Mreg	-1.31177	4.10559e-124	KO_down
ENSMUSG00000060261	Gtf2i	-1.3114	3.65273e-52	KO_down
ENSMUSG00000045333	Zfp423	-1.30937	9.55068e-07	KO_down
ENSMUSG00000024485	Slc4a9	-1.30913	0.0658223	No_Change
ENSMUSG00000034730	Adgrb1	-1.30912	0.00494634	KO_down
ENSMUSG00000053080	Zfta	-1.30777	0.000830869	KO_down
ENSMUSG00000013921	Clip3	-1.30653	0.0101049	KO_down
ENSMUSG00000014602	Kif1a	-1.30501	0.000312966	KO_down
ENSMUSG00000036817	Sun1	-1.30452	1.61396e-165	KO_down
ENSMUSG00000040836	Gpr161	-1.30433	2.30111e-05	KO_down
ENSMUSG00000036606	Plxnb2	-1.30396	8.46335e-90	KO_down
ENSMUSG00000067629	Syngap1	-1.30349	0.00898466	KO_down
ENSMUSG00000037617	Spag1	-1.30325	7.99094e-11	KO_down
ENSMUSG00000034731	Dgkh	-1.30318	4.4409e-06	KO_down
ENSMUSG00000028737	Aldh4a1	-1.30286	5.00451e-72	KO_down
ENSMUSG00000048174	Tmem81	-1.3022	2.54439e-07	KO_down
ENSMUSG00000070570	Slc17a7	-1.30081	9.45453e-05	KO_down
ENSMUSG00000086453	Gm11457	-1.30063	0.00118225	KO_down
ENSMUSG00000027932	Slc27a3	-1.30007	1.84135e-16	KO_down
ENSMUSG00000069601	Ank3	-1.29922	3.31894e-13	KO_down
ENSMUSG00000031700	Gpt2	-1.29918	3.09978e-27	KO_down
ENSMUSG00000026235	Epha4	-1.2976	8.44211e-42	KO_down
ENSMUSG00000042644	Itpr3	-1.29631	1.09636e-110	KO_down
ENSMUSG00000042118	Bhmt2	-1.29545	9.91882e-05	KO_down
ENSMUSG00000045104	Ldhb-ps	-1.29386	0.0663112	No_Change
ENSMUSG00000002104	Rapsn	-1.29351	0.017656	KO_down
ENSMUSG00000031805	Jak3	-1.29345	8.50471e-41	KO_down
ENSMUSG00000021182	Ccdc88c	-1.29332	1.65503e-43	KO_down
ENSMUSG00000001467	Cyp51	-1.29326	4.6671e-48	KO_down
ENSMUSG00000022779	Top3b	-1.29325	4.41587e-65	KO_down
ENSMUSG00000052942	Glis3	-1.29312	3.10675e-05	KO_down
ENSMUSG00000025140	Pycr1	-1.29137	1.31957e-16	KO_down
ENSMUSG00000058216	Gstp3	-1.29092	0.000122065	KO_down
ENSMUSG00000028949	Smarcd3	-1.29092	0.00995861	KO_down
ENSMUSG00000031229	Atrx	-1.29016	1.23714e-63	KO_down
ENSMUSG00000032854	Ugt8a	-1.28904	0.00775831	KO_down
ENSMUSG00000067702	Tuba3a	-1.28883	6.01043e-52	KO_down
ENSMUSG00000041625	Ggact	-1.28716	9.85258e-05	KO_down
ENSMUSG00000070733	Fryl	-1.28533	6.24557e-45	KO_down
ENSMUSG00000045671	Spred2	-1.28495	2.35656e-23	KO_down
ENSMUSG00000033590	Myo5c	-1.28489	1.41486e-13	KO_down
ENSMUSG00000001604	Tcea3	-1.28467	1.8627e-13	KO_down
ENSMUSG00000027777	Schip1	-1.28322	1.945e-19	KO_down
ENSMUSG00000023393	Slc17a9	-1.28321	3.86768e-08	KO_down
ENSMUSG00000035469	Rcbtb1	-1.28082	1.60123e-18	KO_down
ENSMUSG00000056900	Usp13	-1.28038	0.000121536	KO_down
ENSMUSG00000003282	Plag1	-1.28019	2.33639e-08	KO_down
ENSMUSG00000032109	Nlrx1	-1.27898	0.0289036	KO_down
ENSMUSG00000087132	A930001C03Rik	-1.27873	0.0269095	KO_down
ENSMUSG00000010663	Fads1	-1.2779	4.37311e-55	KO_down
ENSMUSG00000020919	Stat5b	-1.27766	3.51348e-07	KO_down
ENSMUSG00000020798	Spns3	-1.2755	0.0665384	No_Change
ENSMUSG00000086813	Gm13657	-1.27529	0.0385039	KO_down
ENSMUSG00000034227	Foxj1	-1.27516	0.0319234	KO_down
ENSMUSG00000031381	Piga	-1.2751	4.86669e-22	KO_down
ENSMUSG00000067818	Myl9	-1.27509	0.0288769	KO_down
ENSMUSG00000053153	Spag16	-1.27487	0.0500352	No_Change
ENSMUSG00000035168	Tanc1	-1.2744	6.58716e-46	KO_down
ENSMUSG00000034324	Tmem132c	-1.27339	0.0161631	KO_down
ENSMUSG00000025650	Col7a1	-1.27324	0.0139345	KO_down
ENSMUSG00000016933	Plcg1	-1.27213	1.43153e-53	KO_down
ENSMUSG00000048349	Pou4f1	-1.27153	0.0009879	KO_down
ENSMUSG00000064202	Spata6l	-1.27059	0.0641078	No_Change
ENSMUSG00000070495	Ctcfl	-1.26972	1.37793e-05	KO_down
ENSMUSG00000020926	Adam11	-1.26947	0.020608	KO_down
ENSMUSG00000030123	Plxnd1	-1.26878	7.11882e-11	KO_down
ENSMUSG00000029103	Lrpap1	-1.26872	1.68514e-49	KO_down
ENSMUSG00000043535	Setx	-1.26831	2.6664e-82	KO_down
ENSMUSG00000052534	Pbx1	-1.26794	7.51155e-11	KO_down
ENSMUSG00000030257	Srgap3	-1.26579	4.10112e-11	KO_down
ENSMUSG00000026932	Nacc2	-1.26422	1.06991e-11	KO_down
ENSMUSG00000033943	Mga	-1.26328	7.70587e-124	KO_down
ENSMUSG00000049823	Zbtb12	-1.26302	0.000650389	KO_down
ENSMUSG00000049288	Lix1l	-1.2615	1.83832e-09	KO_down
ENSMUSG00000091071	1700030C10Rik	-1.26091	5.50458e-08	KO_down
ENSMUSG00000020447	Npc1l1	-1.26046	0.0241571	KO_down
ENSMUSG00000035967	Ints6l	-1.26043	3.34705e-12	KO_down
ENSMUSG00000045259	Klhdc9	-1.25948	0.00249398	KO_down
ENSMUSG00000051166	Eml5	-1.25912	4.14978e-27	KO_down
ENSMUSG00000087341	0610040F04Rik	-1.25841	0.0558791	No_Change
ENSMUSG00000028434	Epb41l4b	-1.2569	1.71671e-16	KO_down
ENSMUSG00000085793	Lin52	-1.2527	2.53651e-10	KO_down
ENSMUSG00000020297	Nsg2	-1.25173	0.0226783	KO_down
ENSMUSG00000049532	Sall2	-1.25113	0.0506355	No_Change
ENSMUSG00000024905	Tesmin	-1.25067	0.00563891	KO_down
ENSMUSG00000026495	Efcab2	-1.25057	0.0296877	KO_down
ENSMUSG00000048616	Nog	-1.24947	0.0467414	KO_down
ENSMUSG00000022203	Efs	-1.2494	1.72302e-07	KO_down
ENSMUSG00000007080	Pole	-1.24933	7.70469e-44	KO_down
ENSMUSG00000041309	Nkx6-2	-1.24763	0.00317363	KO_down
ENSMUSG00000034614	Pik3ip1	-1.2455	0.000143077	KO_down
ENSMUSG00000027288	Zfp106	-1.24543	5.73124e-273	KO_down
ENSMUSG00000025949	Pikfyve	-1.24456	8.63705e-47	KO_down
ENSMUSG00000079487	Med12	-1.24451	6.31349e-33	KO_down
ENSMUSG00000041638	Gcn1	-1.24372	1.59665e-113	KO_down
ENSMUSG00000003178	NA	-1.24263	3.72315e-22	KO_down
ENSMUSG00000033644	Piwil2	-1.24193	3.9865e-07	KO_down
ENSMUSG00000031380	Vegfd	-1.23925	0.016277	KO_down
ENSMUSG00000049539	H1f1	-1.23801	0.0361898	KO_down
ENSMUSG00000026196	Bard1	-1.23795	1.77762e-29	KO_down
ENSMUSG00000040010	Slc7a5	-1.23724	2.62944e-94	KO_down
ENSMUSG00000079472	NA	-1.23548	0.0193483	KO_down
ENSMUSG00000070330	Tmem235	-1.23539	0.0524848	No_Change
ENSMUSG00000035183	Slc24a5	-1.23457	2.37859e-06	KO_down
ENSMUSG00000040867	Begain	-1.23446	0.0624181	No_Change
ENSMUSG00000039145	Camk1d	-1.2341	0.00880563	KO_down
ENSMUSG00000022429	Dmc1	-1.23378	0.000522092	KO_down
ENSMUSG00000020038	Cry1	-1.23359	1.58766e-22	KO_down
ENSMUSG00000049154	Fam183b	-1.2317	0.00136453	KO_down
ENSMUSG00000042156	Dzip1	-1.23065	1.48793e-26	KO_down
ENSMUSG00000020941	Map3k14	-1.23057	0.00399095	KO_down
ENSMUSG00000031502	Col4a1	-1.23025	0	KO_down
ENSMUSG00000028435	Aqp3	-1.23014	3.50826e-295	KO_down
ENSMUSG00000062632	NA	-1.22983	0.000814902	KO_down
ENSMUSG00000042708	Shcbp1l	-1.22667	0.000617175	KO_down
ENSMUSG00000004267	Eno2	-1.22627	7.09827e-08	KO_down
ENSMUSG00000032724	Abtb2	-1.22577	4.4063e-08	KO_down
ENSMUSG00000023120	Ldc1	-1.22406	0.000157118	KO_down
ENSMUSG00000073399	Trim40	-1.22321	0.0637284	No_Change
ENSMUSG00000041119	Pde9a	-1.22269	1.51993e-05	KO_down
ENSMUSG00000057133	Chd6	-1.22252	9.15403e-43	KO_down
ENSMUSG00000032890	Rims3	-1.22245	1.03481e-18	KO_down
ENSMUSG00000041134	Cyyr1	-1.22237	0.067617	No_Change
ENSMUSG00000001985	Grik3	-1.222	2.49331e-14	KO_down
ENSMUSG00000038180	Spag4	-1.22132	0.030943	KO_down
ENSMUSG00000093622	Gm20703	-1.22089	0.0661278	No_Change
ENSMUSG00000044807	Zfp354c	-1.22023	2.97195e-08	KO_down
ENSMUSG00000055560	Zfp459	-1.22019	0.000131478	KO_down
ENSMUSG00000031303	Map3k15	-1.21992	7.92816e-05	KO_down
ENSMUSG00000040945	Rcc2	-1.21952	8.55944e-155	KO_down
ENSMUSG00000006310	Zbtb32	-1.21792	1.63768e-06	KO_down
ENSMUSG00000024339	Tap2	-1.21789	0.0292129	KO_down
ENSMUSG00000039476	Prrx2	-1.21757	0.0020739	KO_down
ENSMUSG00000090433	NA	-1.21692	0.0642511	No_Change
ENSMUSG00000033268	Duox1	-1.21688	0.0587438	No_Change
ENSMUSG00000036523	Greb1	-1.21655	0.0510938	No_Change
ENSMUSG00000022805	Cfap91	-1.21634	0.0101355	KO_down
ENSMUSG00000046591	Ticrr	-1.21629	2.19404e-67	KO_down
ENSMUSG00000023982	Guca1a	-1.21606	2.52517e-05	KO_down
ENSMUSG00000092341	Malat1	-1.21521	1.8997e-05	KO_down
ENSMUSG00000070738	Dgkd	-1.21493	4.31326e-59	KO_down
ENSMUSG00000006782	Cnp	-1.21439	2.3286e-08	KO_down
ENSMUSG00000081965	Gm11620	-1.21422	0.0002672	KO_down
ENSMUSG00000034457	Eda2r	-1.21356	7.31008e-26	KO_down
ENSMUSG00000006205	Htra1	-1.21349	2.45449e-53	KO_down
ENSMUSG00000051527	Usp29	-1.21326	0.000939925	KO_down
ENSMUSG00000046949	Nqo2	-1.21265	1.00752e-22	KO_down
ENSMUSG00000027380	Acoxl	-1.21161	0.050504	No_Change
ENSMUSG00000020439	Smtn	-1.21153	2.9042e-21	KO_down
ENSMUSG00000033107	Rnf125	-1.21112	0.000340539	KO_down
ENSMUSG00000020340	Cyfip2	-1.21045	2.32823e-28	KO_down
ENSMUSG00000002489	Tiam1	-1.2104	5.11533e-30	KO_down
ENSMUSG00000025875	Tspan17	-1.21018	7.51546e-13	KO_down
ENSMUSG00000048731	Ggnbp1	-1.20966	5.56634e-06	KO_down
ENSMUSG00000058325	Dock1	-1.20936	1.22822e-68	KO_down
ENSMUSG00000044707	Ccnjl	-1.20872	0.00501675	KO_down
ENSMUSG00000032411	Tfdp2	-1.20839	6.64424e-39	KO_down
ENSMUSG00000052026	Slc6a7	-1.20621	0.0518751	No_Change
ENSMUSG00000033813	Tcea1	-1.20614	4.54842e-76	KO_down
ENSMUSG00000064105	Cnnm2	-1.20599	4.70225e-32	KO_down
ENSMUSG00000024098	Twsg1	-1.20412	1.34939e-60	KO_down
ENSMUSG00000032846	Zswim6	-1.20309	1.30021e-10	KO_down
ENSMUSG00000049295	Zfp219	-1.20284	4.79877e-21	KO_down
ENSMUSG00000041263	Rusc1	-1.20258	4.62078e-07	KO_down
ENSMUSG00000003863	Ppfia3	-1.20017	0.000167755	KO_down
ENSMUSG00000020420	Zfp607a	-1.19934	0.0601406	No_Change
ENSMUSG00000080115	Eef1akmt3	-1.19934	0.0601406	No_Change
ENSMUSG00000005611	Irag1	-1.1993	0.0491569	KO_down
ENSMUSG00000021384	Susd3	-1.19907	0.0379977	KO_down
ENSMUSG00000003420	Fcgrt	-1.19893	1.27631e-08	KO_down
ENSMUSG00000008305	Tle1	-1.1989	3.414e-33	KO_down
ENSMUSG00000038239	Hrc	-1.19867	4.50622e-09	KO_down
ENSMUSG00000018821	Avpi1	-1.19847	1.03443e-22	KO_down
ENSMUSG00000026475	Rgs16	-1.19735	0.00129377	KO_down
ENSMUSG00000037553	Zdhhc18	-1.1969	4.02142e-52	KO_down
ENSMUSG00000040563	Plppr2	-1.19671	5.01717e-05	KO_down
ENSMUSG00000028988	Ctnnbip1	-1.19539	3.77587e-16	KO_down
ENSMUSG00000025153	Fasn	-1.19529	1.46236e-72	KO_down
ENSMUSG00000026649	Cfap126	-1.19469	0.0454307	KO_down
ENSMUSG00000086784	Isoc2a	-1.19411	2.40323e-23	KO_down
ENSMUSG00000041773	Enc1	-1.1922	3.75163e-31	KO_down
ENSMUSG00000043029	Trpv3	-1.19203	0.00954662	KO_down
ENSMUSG00000028194	Ddah1	-1.19129	8.30402e-32	KO_down
ENSMUSG00000049556	Lingo1	-1.19102	0.0132707	KO_down
ENSMUSG00000020882	Cacnb1	-1.19063	4.56746e-07	KO_down
ENSMUSG00000031628	Casp3	-1.1897	6.36598e-34	KO_down
ENSMUSG00000038560	Sp6	-1.18881	0.00360918	KO_down
ENSMUSG00000060012	Kif13b	-1.18839	7.70245e-34	KO_down
ENSMUSG00000034664	Itga2b	-1.18699	0.000531184	KO_down
ENSMUSG00000019978	Epb41l2	-1.18583	1.23004e-89	KO_down
ENSMUSG00000018865	Sult4a1	-1.18544	4.32214e-12	KO_down
ENSMUSG00000022428	Cby1	-1.18509	6.44673e-14	KO_down
ENSMUSG00000021874	4933413J09Rik	-1.18473	0.0704138	No_Change
ENSMUSG00000029311	Hsd17b11	-1.18461	7.64945e-06	KO_down
ENSMUSG00000074828	NA	-1.18437	0.0583546	No_Change
ENSMUSG00000025742	Prps2	-1.18423	4.147e-21	KO_down
ENSMUSG00000056832	Ttc26	-1.18381	1.44329e-09	KO_down
ENSMUSG00000027663	Zmat3	-1.18343	1.85488e-77	KO_down
ENSMUSG00000014158	Trpv4	-1.18326	0.000460176	KO_down
ENSMUSG00000038351	Sgsm2	-1.18237	1.10633e-17	KO_down
ENSMUSG00000022199	Slc22a17	-1.18225	1.35391e-11	KO_down
ENSMUSG00000046101	Mcmdc2	-1.18206	0.0296699	KO_down
ENSMUSG00000042066	Tmcc2	-1.18105	2.63527e-07	KO_down
ENSMUSG00000042589	Cux2	-1.18103	7.45512e-05	KO_down
ENSMUSG00000073434	Wdr90	-1.17857	3.23662e-14	KO_down
ENSMUSG00000036111	Lmo1	-1.17833	0.0374491	KO_down
ENSMUSG00000044390	Tigd3	-1.17763	0.035071	KO_down
ENSMUSG00000028874	Fgr	-1.1775	0.0160374	KO_down
ENSMUSG00000020277	Pfkl	-1.17701	4.68821e-133	KO_down
ENSMUSG00000024207	Acsbg2	-1.17685	0.0660593	No_Change
ENSMUSG00000039463	Slc9a8	-1.17672	1.82777e-12	KO_down
ENSMUSG00000035064	Eef2k	-1.17641	1.37638e-08	KO_down
ENSMUSG00000006576	Slc4a3	-1.17598	0.00592962	KO_down
ENSMUSG00000029455	Aldh2	-1.1758	1.09983e-74	KO_down
ENSMUSG00000030276	Ttll3	-1.17579	8.12327e-05	KO_down
ENSMUSG00000024989	Cep55	-1.17525	5.83591e-30	KO_down
ENSMUSG00000036452	Arhgap26	-1.17513	2.12904e-06	KO_down
ENSMUSG00000072419	Dppa2	-1.17407	5.64283e-20	KO_down
ENSMUSG00000041390	Mdfic	-1.17407	3.02381e-05	KO_down
ENSMUSG00000040054	Baz2a	-1.173	1.76727e-274	KO_down
ENSMUSG00000065954	Tacc1	-1.1729	4.11654e-90	KO_down
ENSMUSG00000031609	Sap30	-1.17266	1.45816e-22	KO_down
ENSMUSG00000025813	Homer2	-1.17244	1.50424e-05	KO_down
ENSMUSG00000007440	Pcdha10	-1.17146	0.0418403	KO_down
ENSMUSG00000082615	Gm13239	-1.17139	0.0565001	No_Change
ENSMUSG00000045658	Pid1	-1.17115	1.96573e-05	KO_down
ENSMUSG00000048371	Pdp2	-1.17076	5.26556e-31	KO_down
ENSMUSG00000029516	Cit	-1.17013	2.10591e-42	KO_down
ENSMUSG00000035954	Dock4	-1.16973	5.20276e-07	KO_down
ENSMUSG00000085156	Snhg15	-1.16902	1.20934e-16	KO_down
ENSMUSG00000028979	Masp2	-1.16877	0.0370531	KO_down
ENSMUSG00000004961	Syt5	-1.16779	0.0133749	KO_down
ENSMUSG00000000085	Scmh1	-1.16653	2.15239e-09	KO_down
ENSMUSG00000028132	Tlcd4	-1.1665	0.0519912	No_Change
ENSMUSG00000034684	Sema3f	-1.16495	0.000475864	KO_down
ENSMUSG00000035390	Brsk1	-1.16471	1.34457e-06	KO_down
ENSMUSG00000015134	Aldh1a3	-1.16394	0.0728121	No_Change
ENSMUSG00000035293	G2e3	-1.16272	2.51478e-28	KO_down
ENSMUSG00000022432	Smc1b	-1.16057	1.2471e-08	KO_down
ENSMUSG00000001521	Tulp3	-1.15996	3.10702e-21	KO_down
ENSMUSG00000026077	Npas2	-1.1592	0.0403876	KO_down
ENSMUSG00000005057	Sh2b2	-1.15838	0.00262836	KO_down
ENSMUSG00000037386	Rims2	-1.15826	0.000557333	KO_down
ENSMUSG00000049971	Glt1d1	-1.15765	1.59725e-05	KO_down
ENSMUSG00000026788	Zbtb43	-1.15694	1.02767e-31	KO_down
ENSMUSG00000078938	Syce3	-1.15687	0.0295464	KO_down
ENSMUSG00000013523	Bcas1	-1.15635	0.00111165	KO_down
ENSMUSG00000068221	NA	-1.15586	1.37004e-09	KO_down
ENSMUSG00000039316	Rftn1	-1.15558	0.000162252	KO_down
ENSMUSG00000052125	F730043M19Rik	-1.15542	0.000251393	KO_down
ENSMUSG00000020061	Mybpc1	-1.15526	0.0296164	KO_down
ENSMUSG00000033102	Cdc14b	-1.15524	7.26528e-18	KO_down
ENSMUSG00000002257	Def6	-1.15515	1.66216e-07	KO_down
ENSMUSG00000085769	NA	-1.15477	0.0130734	KO_down
ENSMUSG00000044164	Rnf182	-1.15426	0.0345088	KO_down
ENSMUSG00000015377	Dennd6b	-1.15423	3.86481e-05	KO_down
ENSMUSG00000040204	Pclaf	-1.15146	1.42287e-07	KO_down
ENSMUSG00000039086	Ss18l1	-1.15126	1.56382e-11	KO_down
ENSMUSG00000001497	Pax9	-1.14943	0.0106455	KO_down
ENSMUSG00000024642	Tle4	-1.14893	3.8697e-17	KO_down
ENSMUSG00000002083	Bbc3	-1.14873	5.85559e-33	KO_down
ENSMUSG00000078653	Cntd1	-1.14806	9.87849e-05	KO_down
ENSMUSG00000029313	Aff1	-1.14688	5.86167e-66	KO_down
ENSMUSG00000003379	Cd79a	-1.14615	0.0478473	KO_down
ENSMUSG00000001150	Mcm3ap	-1.1459	8.86198e-50	KO_down
ENSMUSG00000002980	Bcam	-1.14515	7.07742e-26	KO_down
ENSMUSG00000039989	Cbx4	-1.14496	4.91978e-07	KO_down
ENSMUSG00000034686	Prr7	-1.1445	0.00924286	KO_down
ENSMUSG00000023966	Rsph9	-1.14335	0.000771081	KO_down
ENSMUSG00000028919	Arhgef19	-1.1429	4.99868e-13	KO_down
ENSMUSG00000079738	NA	-1.14251	0.000115461	KO_down
ENSMUSG00000063594	Gng8	-1.14229	0.0567467	No_Change
ENSMUSG00000040447	Spns2	-1.14156	0.0296798	KO_down
ENSMUSG00000019732	Calr3	-1.14082	0.024286	KO_down
ENSMUSG00000037826	Ppm1k	-1.13981	1.17418e-08	KO_down
ENSMUSG00000020893	Per1	-1.13928	4.50928e-33	KO_down
ENSMUSG00000022257	Laptm4b	-1.13924	2.54571e-28	KO_down
ENSMUSG00000034460	Six4	-1.1389	1.9359e-13	KO_down
ENSMUSG00000039529	Atp8b1	-1.13793	0.00816282	KO_down
ENSMUSG00000032387	Rbpms2	-1.13725	1.11808e-81	KO_down
ENSMUSG00000031995	St14	-1.13707	6.10612e-80	KO_down
ENSMUSG00000038155	Gstp2	-1.13694	5.85377e-16	KO_down
ENSMUSG00000018509	Cenpv	-1.1343	3.13534e-13	KO_down
ENSMUSG00000009092	Derl3	-1.13361	0.00830947	KO_down
ENSMUSG00000026187	Xrcc5	-1.13352	1.82052e-31	KO_down
ENSMUSG00000026955	Sapcd2	-1.13327	1.48148e-08	KO_down
ENSMUSG00000028402	Mpdz	-1.13245	0.000333446	KO_down
ENSMUSG00000017950	Hnf4a	-1.13072	0.000221924	KO_down
ENSMUSG00000025203	Scd2	-1.12986	5.05903e-238	KO_down
ENSMUSG00000025492	Ifitm3	-1.12957	2.09984e-12	KO_down
ENSMUSG00000064647	Gm23301	-1.12884	0.075609	No_Change
ENSMUSG00000027238	Frmd5	-1.12811	0.000253253	KO_down
ENSMUSG00000055692	Tmem191c	-1.12806	2.28188e-18	KO_down
ENSMUSG00000043323	Fbrsl1	-1.12801	2.02486e-23	KO_down
ENSMUSG00000026604	Ptpn14	-1.1272	1.00416e-34	KO_down
ENSMUSG00000034040	Galnt17	-1.12668	0.0498406	KO_down
ENSMUSG00000019359	Gdpd2	-1.12636	0.0145085	KO_down
ENSMUSG00000061607	Mdc1	-1.12555	6.89948e-115	KO_down
ENSMUSG00000053137	Mapk11	-1.12545	0.0187858	KO_down
ENSMUSG00000026480	Ncf2	-1.12378	0.000111521	KO_down
ENSMUSG00000003316	Glg1	-1.12273	2.08431e-119	KO_down
ENSMUSG00000037243	Zfp692	-1.12268	1.14152e-20	KO_down
ENSMUSG00000027438	Napb	-1.12258	0.00235436	KO_down
ENSMUSG00000005566	Trim28	-1.11999	3.66239e-288	KO_down
ENSMUSG00000023036	Pcdhgc4	-1.1191	2.00209e-18	KO_down
ENSMUSG00000010607	Pigyl	-1.11897	4.56336e-12	KO_down
ENSMUSG00000014245	Pigl	-1.11864	2.40951e-14	KO_down
ENSMUSG00000056367	Actr3b	-1.11695	8.5337e-08	KO_down
ENSMUSG00000004187	Kifc2	-1.1165	4.03084e-06	KO_down
ENSMUSG00000052609	Plekhg3	-1.11633	1.43565e-27	KO_down
ENSMUSG00000005357	Slc1a6	-1.11622	0.0680921	No_Change
ENSMUSG00000020681	Ace	-1.11595	4.65689e-08	KO_down
ENSMUSG00000091251	NA	-1.11595	0.0450311	KO_down
ENSMUSG00000079733	NA	-1.11549	3.8266e-15	KO_down
ENSMUSG00000034210	Efcab14	-1.11489	3.50649e-24	KO_down
ENSMUSG00000047242	Taf9b	-1.11451	0.00164725	KO_down
ENSMUSG00000084941	Gm11944	-1.11451	0.0651198	No_Change
ENSMUSG00000021097	Clmn	-1.11425	1.43568e-13	KO_down
ENSMUSG00000045005	Fzd5	-1.1142	2.16123e-24	KO_down
ENSMUSG00000026189	Pecr	-1.11345	1.65023e-12	KO_down
ENSMUSG00000063296	Tmem117	-1.11318	0.0158983	KO_down
ENSMUSG00000020471	Pold2	-1.11307	1.43596e-49	KO_down
ENSMUSG00000027173	Depdc7	-1.11116	5.769e-08	KO_down
ENSMUSG00000039903	Eva1c	-1.11102	0.0787258	No_Change
ENSMUSG00000029591	Ung	-1.11097	5.13143e-39	KO_down
ENSMUSG00000063439	B9d2	-1.10697	0.00790847	KO_down
ENSMUSG00000021559	Dapk1	-1.10685	3.76084e-25	KO_down
ENSMUSG00000032434	Cmtm6	-1.10588	3.71822e-75	KO_down
ENSMUSG00000086897	NA	-1.10534	0.077119	No_Change
ENSMUSG00000085521	4930526A20Rik	-1.10516	0.0444634	KO_down
ENSMUSG00000026116	Tmem131	-1.10506	7.17749e-74	KO_down
ENSMUSG00000021375	Kif13a	-1.10495	5.7557e-24	KO_down
ENSMUSG00000023087	Noct	-1.10454	4.71838e-17	KO_down
ENSMUSG00000026496	Parp1	-1.10452	1.93279e-247	KO_down
ENSMUSG00000021257	Angel1	-1.10441	1.03923e-16	KO_down
ENSMUSG00000014498	Ankrd52	-1.1036	2.80723e-19	KO_down
ENSMUSG00000029603	Dtx1	-1.10293	5.33556e-08	KO_down
ENSMUSG00000039577	Nphp4	-1.10234	7.06334e-06	KO_down
ENSMUSG00000037418	Best1	-1.10192	0.0726645	No_Change
ENSMUSG00000073557	Ppp1r12b	-1.10004	2.38564e-11	KO_down
ENSMUSG00000085622	3110056K07Rik	-1.09987	0.0185004	KO_down
ENSMUSG00000035274	Tpbg	-1.09955	1.38042e-11	KO_down
ENSMUSG00000001482	Def8	-1.09931	1.37911e-28	KO_down
ENSMUSG00000020248	Nfyb	-1.09847	6.60699e-30	KO_down
ENSMUSG00000029730	Mcm7	-1.09742	3.9418e-158	KO_down
ENSMUSG00000003279	Dlgap1	-1.09623	0.0292216	KO_down
ENSMUSG00000031379	Pir	-1.09573	0.00144642	KO_down
ENSMUSG00000073568	Arl14epl	-1.09545	2.05707e-26	KO_down
ENSMUSG00000044702	Palb2	-1.09523	3.12115e-13	KO_down
ENSMUSG00000045216	Hs6st1	-1.09466	4.20893e-53	KO_down
ENSMUSG00000024521	Pmaip1	-1.09384	2.49118e-15	KO_down
ENSMUSG00000028023	Pitx2	-1.09333	0.0136668	KO_down
ENSMUSG00000041530	Ago1	-1.09177	2.4275e-20	KO_down
ENSMUSG00000014592	Camta1	-1.09156	2.35455e-11	KO_down
ENSMUSG00000062762	Ei24	-1.09137	3.9257e-57	KO_down
ENSMUSG00000067889	Sptbn2	-1.09095	2.19961e-15	KO_down
ENSMUSG00000019850	Tnfaip3	-1.09041	0.000401333	KO_down
ENSMUSG00000062619	2310039H08Rik	-1.09036	0.00405505	KO_down
ENSMUSG00000051855	Mest	-1.09025	4.15537e-14	KO_down
ENSMUSG00000075702	Selenom	-1.09009	2.21988e-07	KO_down
ENSMUSG00000029174	Tbc1d1	-1.09001	1.75782e-61	KO_down
ENSMUSG00000008575	Nfib	-1.08992	2.43622e-05	KO_down
ENSMUSG00000029171	Pgm2	-1.08938	1.93108e-36	KO_down
ENSMUSG00000020898	Ctc1	-1.08913	2.69436e-72	KO_down
ENSMUSG00000041020	Map7d2	-1.08756	1.881e-08	KO_down
ENSMUSG00000028558	Calr4	-1.08718	0.0002782	KO_down
ENSMUSG00000056004	Elapor2	-1.0867	0.0157778	KO_down
ENSMUSG00000039187	Fanci	-1.08667	4.24096e-30	KO_down
ENSMUSG00000001151	Pcnt	-1.08623	5.81117e-65	KO_down
ENSMUSG00000032093	Cd3e	-1.08485	0.0761976	No_Change
ENSMUSG00000019823	Mical1	-1.0845	1.66054e-10	KO_down
ENSMUSG00000085723	Gm15915	-1.08444	0.0803176	No_Change
ENSMUSG00000027536	Chmp4c	-1.08425	3.64773e-18	KO_down
ENSMUSG00000024987	Cyp26a1	-1.08424	0.0702328	No_Change
ENSMUSG00000029833	Trim24	-1.08417	1.04721e-56	KO_down
ENSMUSG00000049291	Prss38	-1.08415	0.0169893	KO_down
ENSMUSG00000050050	Ccdc158	-1.08405	2.35444e-07	KO_down
ENSMUSG00000043411	Usp48	-1.08376	9.67482e-190	KO_down
ENSMUSG00000058420	Syt17	-1.08353	0.0431686	KO_down
ENSMUSG00000025154	Arhgap19	-1.08314	1.22802e-52	KO_down
ENSMUSG00000036242	Armh4	-1.083	4.07659e-09	KO_down
ENSMUSG00000020646	Mboat2	-1.08247	1.15315e-12	KO_down
ENSMUSG00000074179	Gsta5	-1.08211	0.0619825	No_Change
ENSMUSG00000041483	Zfp281	-1.08174	4.57953e-21	KO_down
ENSMUSG00000034336	Ina	-1.08141	0.060096	No_Change
ENSMUSG00000032561	Acpp	-1.08112	1.39852e-09	KO_down
ENSMUSG00000024786	Majin	-1.08064	0.0708031	No_Change
ENSMUSG00000020607	Lratd1	-1.07972	0.0786403	No_Change
ENSMUSG00000034023	Fancd2	-1.07933	8.20686e-25	KO_down
ENSMUSG00000092839	NA	-1.07867	0.0812238	No_Change
ENSMUSG00000045007	Tubg2	-1.07831	0.07589	No_Change
ENSMUSG00000063765	Chadl	-1.0783	0.00576435	KO_down
ENSMUSG00000030411	Nova2	-1.07508	2.43859e-08	KO_down
ENSMUSG00000031629	Cenpu	-1.07419	6.87431e-12	KO_down
ENSMUSG00000080465	Snord94	-1.07405	0.0790887	No_Change
ENSMUSG00000020910	Adprm	-1.07377	3.72473e-06	KO_down
ENSMUSG00000057367	Birc2	-1.07355	8.52403e-25	KO_down
ENSMUSG00000063179	Pstk	-1.0734	1.96327e-09	KO_down
ENSMUSG00000033253	Szt2	-1.07311	1.22938e-22	KO_down
ENSMUSG00000048612	Myof	-1.07295	1.58629e-23	KO_down
ENSMUSG00000011831	Evi5	-1.0729	4.72198e-45	KO_down
ENSMUSG00000040364	Sec1	-1.07276	0.0276894	KO_down
ENSMUSG00000086391	1700042O10Rik	-1.07124	0.0760044	No_Change
ENSMUSG00000086202	1700019E08Rik	-1.07075	0.0288918	KO_down
ENSMUSG00000013275	Slc41a1	-1.07014	2.61927e-15	KO_down
ENSMUSG00000059659	Gm10069	-1.07	0.017612	KO_down
ENSMUSG00000017764	Zswim1	-1.06999	1.38027e-39	KO_down
ENSMUSG00000033722	BC034090	-1.06908	0.00168827	KO_down
ENSMUSG00000023830	Igf2r	-1.06885	4.89059e-100	KO_down
ENSMUSG00000020186	Csrp2	-1.06853	1.08703e-36	KO_down
ENSMUSG00000014846	Tppp3	-1.06806	0.00158353	KO_down
ENSMUSG00000030382	Slc27a5	-1.06703	0.0727314	No_Change
ENSMUSG00000072572	Slc39a2	-1.0669	0.0520882	No_Change
ENSMUSG00000066705	Fxyd6	-1.06682	1.71086e-75	KO_down
ENSMUSG00000058070	Eml1	-1.06609	0.00159813	KO_down
ENSMUSG00000031837	Necab2	-1.06577	1.19208e-08	KO_down
ENSMUSG00000007029	Vars	-1.06397	9.61292e-87	KO_down
ENSMUSG00000022575	Gsdmd	-1.06363	0.00244466	KO_down
ENSMUSG00000022504	Ciita	-1.0627	0.0763547	No_Change
ENSMUSG00000066026	Dhrs3	-1.06233	0.000123874	KO_down
ENSMUSG00000050199	Lgr4	-1.06202	6.12002e-14	KO_down
ENSMUSG00000031403	Dkc1	-1.06097	4.41164e-75	KO_down
ENSMUSG00000015222	Map2	-1.05993	0.0047609	KO_down
ENSMUSG00000048636	A730049H05Rik	-1.05969	0.0764631	No_Change
ENSMUSG00000003134	Tbc1d8	-1.05943	2.13086e-28	KO_down
ENSMUSG00000033222	Ttf2	-1.05787	1.21642e-37	KO_down
ENSMUSG00000042548	Asxl1	-1.05783	7.74145e-50	KO_down
ENSMUSG00000033545	Znrf1	-1.0576	4.09886e-11	KO_down
ENSMUSG00000034303	Ccdc15	-1.05756	1.86826e-07	KO_down
ENSMUSG00000083081	Gm13223	-1.05652	0.0858376	No_Change
ENSMUSG00000033491	Prss35	-1.05635	3.06618e-05	KO_down
ENSMUSG00000042198	Chchd7	-1.05621	1.52508e-06	KO_down
ENSMUSG00000041308	Sntb2	-1.05574	1.89406e-19	KO_down
ENSMUSG00000073795	Spef1l	-1.05568	0.0132285	KO_down
ENSMUSG00000007950	Abhd8	-1.05544	6.11486e-07	KO_down
ENSMUSG00000032827	Ppp1r9a	-1.05538	1.85655e-08	KO_down
ENSMUSG00000019194	Scn1b	-1.05531	5.61848e-07	KO_down
ENSMUSG00000002808	Epdr1	-1.05528	0.0122613	KO_down
ENSMUSG00000019590	Cyb561	-1.05495	1.92165e-11	KO_down
ENSMUSG00000037622	Wdtc1	-1.05465	6.27787e-116	KO_down
ENSMUSG00000052446	Zfp961	-1.05437	1.60729e-23	KO_down
ENSMUSG00000022456	Septin3	-1.0538	2.34892e-07	KO_down
ENSMUSG00000026247	Ecel1	-1.05362	0.0557813	No_Change
ENSMUSG00000026837	Col5a1	-1.05319	8.68701e-11	KO_down
ENSMUSG00000014303	Glis2	-1.05272	2.78922e-07	KO_down
ENSMUSG00000053765	Oas1f	-1.05221	0.0693846	No_Change
ENSMUSG00000063524	Eno1	-1.05208	0	KO_down
ENSMUSG00000025646	Atrip	-1.0515	9.86657e-08	KO_down
ENSMUSG00000000402	Egfl6	-1.05146	0.0387029	KO_down
ENSMUSG00000030717	Nupr1	-1.05096	3.30389e-08	KO_down
ENSMUSG00000093483	AA465934	-1.05071	0.000162188	KO_down
ENSMUSG00000044231	Nhlrc1	-1.05061	0.0146464	KO_down
ENSMUSG00000080469	Snord98	-1.05014	0.0226859	KO_down
ENSMUSG00000087885	NA	-1.05014	0.0226859	KO_down
ENSMUSG00000041740	Rnf10	-1.05004	1.79116e-153	KO_down
ENSMUSG00000044816	D630023F18Rik	-1.04932	4.92718e-08	KO_down
ENSMUSG00000028641	P3h1	-1.04897	9.38214e-23	KO_down
ENSMUSG00000031508	Ankrd10	-1.04837	3.71723e-27	KO_down
ENSMUSG00000032115	Hyou1	-1.04713	2.93161e-85	KO_down
ENSMUSG00000042535	Gtpbp1	-1.04687	1.30651e-21	KO_down
ENSMUSG00000000253	Gmpr	-1.04642	2.07423e-07	KO_down
ENSMUSG00000038593	Tctn1	-1.04503	3.81447e-11	KO_down
ENSMUSG00000078695	Cisd3	-1.04468	1.25038e-08	KO_down
ENSMUSG00000035713	Usp35	-1.04464	4.1219e-05	KO_down
ENSMUSG00000053550	Shisa7	-1.04435	0.00211027	KO_down
ENSMUSG00000028763	Hspg2	-1.04404	5.4587e-264	KO_down
ENSMUSG00000019467	Arhgef25	-1.04363	2.81053e-07	KO_down
ENSMUSG00000052955	Cpvl	-1.04358	0.0227981	KO_down
ENSMUSG00000087339	Gm11586	-1.04358	0.0227981	KO_down
ENSMUSG00000022679	Mpv17l	-1.04192	5.02192e-05	KO_down
ENSMUSG00000036411	9530077C05Rik	-1.04167	0.00773128	KO_down
ENSMUSG00000050310	Rictor	-1.04136	3.58173e-28	KO_down
ENSMUSG00000078817	Nlrp12	-1.04131	0.0870821	No_Change
ENSMUSG00000027296	Itpka	-1.04007	6.07656e-05	KO_down
ENSMUSG00000037166	Ppp1r14a	-1.03969	5.53821e-06	KO_down
ENSMUSG00000032344	Cgas	-1.03961	0.0517669	No_Change
ENSMUSG00000043342	Hoxd9	-1.03932	0.0422766	KO_down
ENSMUSG00000035121	Neil2	-1.03853	0.00519325	KO_down
ENSMUSG00000062309	Rpp25	-1.03828	5.54991e-12	KO_down
ENSMUSG00000008090	Fgfrl1	-1.03775	3.8439e-06	KO_down
ENSMUSG00000036568	Bicral	-1.03734	5.19479e-18	KO_down
ENSMUSG00000038252	Ncapd2	-1.03669	6.10233e-109	KO_down
ENSMUSG00000033436	Armcx2	-1.03595	4.48074e-06	KO_down
ENSMUSG00000051278	Zgrf1	-1.03581	1.82806e-15	KO_down
ENSMUSG00000056427	Slit3	-1.03575	0.00459099	KO_down
ENSMUSG00000035878	Hykk	-1.03489	0.000133495	KO_down
ENSMUSG00000093445	Lrch4	-1.03441	0.080212	No_Change
ENSMUSG00000078919	Dpm1	-1.03413	5.42444e-07	KO_down
ENSMUSG00000026489	Coq8a	-1.034	1.32464e-07	KO_down
ENSMUSG00000055923	Aasdh	-1.03386	1.29192e-10	KO_down
ENSMUSG00000082280	Gm5847	-1.03373	0.0890843	No_Change
ENSMUSG00000062510	Nsl1	-1.03352	1.80723e-13	KO_down
ENSMUSG00000040312	Cchcr1	-1.03317	1.83321e-15	KO_down
ENSMUSG00000070000	Fcho1	-1.03298	2.4948e-13	KO_down
ENSMUSG00000040415	Dtx3	-1.03231	4.61173e-09	KO_down
ENSMUSG00000023224	Serping1	-1.03164	1.62751e-08	KO_down
ENSMUSG00000003378	Grik5	-1.03114	1.05654e-07	KO_down
ENSMUSG00000028766	Alpl	-1.03094	2.40211e-85	KO_down
ENSMUSG00000028397	Kdm4c	-1.03093	1.33589e-38	KO_down
ENSMUSG00000053641	Dennd4a	-1.03084	9.8633e-19	KO_down
ENSMUSG00000052301	Doc2a	-1.03059	0.0273001	KO_down
ENSMUSG00000027309	Dnaaf9	-1.03021	1.43543e-18	KO_down
ENSMUSG00000031365	Zfp275	-1.02995	6.66925e-10	KO_down
ENSMUSG00000055725	Paqr3	-1.02973	3.09039e-05	KO_down
ENSMUSG00000053113	Socs3	-1.02946	2.0759e-52	KO_down
ENSMUSG00000018654	Ikzf1	-1.02791	0.0776579	No_Change
ENSMUSG00000034452	Slc24a1	-1.02791	0.0776579	No_Change
ENSMUSG00000004085	Map3k20	-1.02734	3.22705e-11	KO_down
ENSMUSG00000031950	Gabarapl2	-1.02697	1.32632e-77	KO_down
ENSMUSG00000030671	Pde3b	-1.02694	0.000317759	KO_down
ENSMUSG00000001333	Sync	-1.02658	4.06174e-08	KO_down
ENSMUSG00000041346	Wrap53	-1.02568	7.51155e-11	KO_down
ENSMUSG00000049047	Armcx3	-1.0254	0.0182588	KO_down
ENSMUSG00000008999	Bmp7	-1.02532	7.11882e-11	KO_down
ENSMUSG00000039661	Dusp26	-1.02472	0.0836732	No_Change
ENSMUSG00000045009	Prrt3	-1.02466	0.067753	No_Change
ENSMUSG00000074398	Gm15441	-1.02425	0.00817521	KO_down
ENSMUSG00000057614	Gnai1	-1.02362	9.20233e-06	KO_down
ENSMUSG00000054909	Wbscr25	-1.02336	0.0884831	No_Change
ENSMUSG00000018501	Ncor1	-1.02184	1.41231e-80	KO_down
ENSMUSG00000003355	Fkbp11	-1.02142	1.43929e-07	KO_down
ENSMUSG00000067261	Foxd3	-1.02138	0.0113658	KO_down
ENSMUSG00000034807	Colgalt1	-1.02113	3.24404e-56	KO_down
ENSMUSG00000087377	AV099323	-1.02047	0.0833603	No_Change
ENSMUSG00000051319	Mtln	-1.02032	0.000451457	KO_down
ENSMUSG00000041429	Nthl1	-1.0201	6.30601e-08	KO_down
ENSMUSG00000026014	Raph1	-1.01988	4.02271e-09	KO_down
ENSMUSG00000005774	Rfx5	-1.01973	0.000141813	KO_down
ENSMUSG00000010825	Grid2ip	-1.0191	0.0230294	KO_down
ENSMUSG00000042788	Fam166b	-1.0191	0.0230294	KO_down
ENSMUSG00000080134	NA	-1.0191	0.0230294	KO_down
ENSMUSG00000089984	Fbxo24	-1.0191	0.0230294	KO_down
ENSMUSG00000001507	Itga3	-1.01878	1.06595e-21	KO_down
ENSMUSG00000074925	Ptar1	-1.01836	0.00515296	KO_down
ENSMUSG00000061740	Cyp2d22	-1.01828	0.0163562	KO_down
ENSMUSG00000058006	Mdn1	-1.01771	1.60636e-73	KO_down
ENSMUSG00000074656	Eif2s2	-1.0175	1.7996e-251	KO_down
ENSMUSG00000028970	Abcb1b	-1.01732	2.8659e-08	KO_down
ENSMUSG00000059897	Zfp930	-1.01729	8.02613e-07	KO_down
ENSMUSG00000017667	Zfp334	-1.0163	0.00926811	KO_down
ENSMUSG00000085956	4930481B07Rik	-1.01562	0.0247094	KO_down
ENSMUSG00000074802	Gas2l3	-1.01539	3.45296e-26	KO_down
ENSMUSG00000020057	Dram1	-1.0151	0.0903264	No_Change
ENSMUSG00000062691	Cebpzos	-1.01485	1.47598e-09	KO_down
ENSMUSG00000028003	Lrat	-1.01478	0.0830946	No_Change
ENSMUSG00000033066	Gas7	-1.01474	1.31219e-06	KO_down
ENSMUSG00000038587	Akap12	-1.01473	1.08977e-210	KO_down
ENSMUSG00000029056	Pank4	-1.01383	3.27995e-22	KO_down
ENSMUSG00000028445	Enho	-1.01372	0.0196531	KO_down
ENSMUSG00000003411	Rab3b	-1.01312	2.87173e-09	KO_down
ENSMUSG00000029290	Zfp326	-1.01265	5.44411e-10	KO_down
ENSMUSG00000040935	Padi6	-1.01137	0.0838817	No_Change
ENSMUSG00000037270	4932438A13Rik	-1.01113	2.09726e-41	KO_down
ENSMUSG00000009731	Kcnd1	-1.01064	4.4019e-06	KO_down
ENSMUSG00000042046	Dstyk	-1.00964	8.17294e-09	KO_down
ENSMUSG00000078872	Gm14401	-1.0095	0.0135206	KO_down
ENSMUSG00000039194	Rlbp1	-1.00851	0.0105604	KO_down
ENSMUSG00000035900	Gramd4	-1.00838	8.11203e-06	KO_down
ENSMUSG00000064451	Snora23	-1.00724	0.0902287	No_Change
ENSMUSG00000028047	Thbs3	-1.00707	0.0363145	KO_down
ENSMUSG00000048707	Tprn	-1.00682	2.81087e-15	KO_down
ENSMUSG00000069814	Ccdc92b	-1.00678	0.000802181	KO_down
ENSMUSG00000022246	Rai14	-1.00665	3.89362e-39	KO_down
ENSMUSG00000052533	Nup188	-1.00659	5.31119e-99	KO_down
ENSMUSG00000042102	Dmgdh	-1.00609	4.8066e-09	KO_down
ENSMUSG00000028496	Mllt3	-1.00587	3.4899e-07	KO_down
ENSMUSG00000020532	Acaca	-1.00515	4.05594e-22	KO_down
ENSMUSG00000029267	Mtf2	-1.00506	3.31869e-140	KO_down
ENSMUSG00000032294	Pkm	-1.00473	0	KO_down
ENSMUSG00000027570	Col9a3	-1.0044	0.0407716	KO_down
ENSMUSG00000078671	Chd2	-1.00429	1.01964e-29	KO_down
ENSMUSG00000034168	Irf2bpl	-1.00404	7.53512e-27	KO_down
ENSMUSG00000037337	Map4k1	-1.0038	5.12675e-10	KO_down
ENSMUSG00000020108	Ddit4	-1.00264	8.13365e-78	KO_down
ENSMUSG00000040928	S100pbp	-1.00166	2.0207e-35	KO_down
ENSMUSG00000042372	Dmrt3	-1.0016	0.0157428	KO_down
ENSMUSG00000053297	AI854703	-1.00143	0.0915203	No_Change
ENSMUSG00000026177	Slc11a1	-1.00136	0.0151483	KO_down
ENSMUSG00000025666	Tmem47	-1.00128	0.00167474	KO_down
ENSMUSG00000085859	NA	-1.00107	0.0187435	KO_down
ENSMUSG00000006378	Gcat	-1.00046	5.03977e-13	KO_down
ENSMUSG00000045004	Spata21	-0.999549	0.0783823	No_Change
ENSMUSG00000082758	Gm13024	-0.998875	0.0819236	No_Change
ENSMUSG00000024008	Cpne5	-0.998029	2.22312e-06	No_Change
ENSMUSG00000021238	Aldh6a1	-0.997816	1.65264e-17	No_Change
ENSMUSG00000023259	Slc26a6	-0.997669	0.00929183	No_Change
ENSMUSG00000033478	Fam160b1	-0.997573	2.50035e-15	No_Change
ENSMUSG00000027525	Phactr3	-0.997083	0.0584459	No_Change
ENSMUSG00000059842	Zfp341	-0.99708	3.21121e-09	No_Change
ENSMUSG00000036186	Dipk1b	-0.996857	0.01099	No_Change
ENSMUSG00000033392	Clasp2	-0.996663	4.19276e-35	No_Change
ENSMUSG00000034245	Hdac11	-0.996377	3.12283e-06	No_Change
ENSMUSG00000078933	NA	-0.995488	0.0708739	No_Change
ENSMUSG00000073728	Tmem51os1	-0.99505	0.0679017	No_Change
ENSMUSG00000093402	Gm18588	-0.994173	0.0680303	No_Change
ENSMUSG00000041936	Agrn	-0.993914	3.6807e-106	No_Change
ENSMUSG00000008855	Hdac5	-0.99389	1.64022e-30	No_Change
ENSMUSG00000017390	Aldoc	-0.993823	4.56517e-18	No_Change
ENSMUSG00000061468	NA	-0.993566	0.0918388	No_Change
ENSMUSG00000028295	Smim8	-0.993245	2.41943e-05	No_Change
ENSMUSG00000032850	Rnft2	-0.992359	5.04678e-07	No_Change
ENSMUSG00000000325	NA	-0.992278	2.70447e-40	No_Change
ENSMUSG00000034685	Fam171a2	-0.992217	0.00361761	No_Change
ENSMUSG00000071793	2610005L07Rik	-0.992053	5.51968e-22	No_Change
ENSMUSG00000020547	Bzw2	-0.991713	1.92958e-42	No_Change
[truncated: 20,054 more rows]

## Sheet: 4E-Sox2cKO_WithDox_vs_NoDox
ensembl_gene_id	external_gene_name	logFC	FDR	status
ENSMUSG00000000001	Gnai3	0.506475	1.16333e-20	No_Change
ENSMUSG00000000028	Cdc45	-0.453586	7.35738e-09	No_Change
ENSMUSG00000000031	H19	3.4946	0	KO_up
ENSMUSG00000000037	Scml2	0.355329	1.38227e-05	No_Change
ENSMUSG00000000056	Narf	0.0715557	0.630008	No_Change
ENSMUSG00000000058	Cav2	0.303878	0.32646	No_Change
ENSMUSG00000000078	Klf6	1.59611	6.17141e-175	KO_up
ENSMUSG00000000085	Scmh1	-0.67617	6.53171e-07	No_Change
ENSMUSG00000000088	Cox5a	-0.924835	2.2214e-83	No_Change
ENSMUSG00000000093	Tbx2	-0.496454	0.264469	No_Change
ENSMUSG00000000094	Tbx4	-4.38771	0.000111225	KO_down
ENSMUSG00000000103	Zfy2	0.0468293	0.886458	No_Change
ENSMUSG00000000120	Ngfr	-2.36958	7.42171e-17	KO_down
ENSMUSG00000000125	Wnt3	-2.27055	0.0224865	KO_down
ENSMUSG00000000126	Wnt9a	0.69159	0.00766971	No_Change
ENSMUSG00000000127	Fer	0.0256905	0.886117	No_Change
ENSMUSG00000000131	Xpo6	-0.0224091	0.77621	No_Change
ENSMUSG00000000134	Tfe3	0.0625954	0.496203	No_Change
ENSMUSG00000000142	Axin2	-0.163587	0.626823	No_Change
ENSMUSG00000000148	Brat1	0.777477	7.954e-13	No_Change
ENSMUSG00000000149	Gna12	-0.011672	0.924474	No_Change
ENSMUSG00000000154	Slc22a18	3.04883	3.5393e-27	KO_up
ENSMUSG00000000159	Igsf5	-0.0268796	0.942762	No_Change
ENSMUSG00000000167	Pih1d2	-0.49721	0.220874	No_Change
ENSMUSG00000000168	Dlat	0.0952633	0.270217	No_Change
ENSMUSG00000000171	Sdhd	-0.458744	3.31791e-10	No_Change
ENSMUSG00000000182	Fgf23	-0.370489	0.267666	No_Change
ENSMUSG00000000183	Fgf6	-0.0419627	NA	No_Change
ENSMUSG00000000184	Ccnd2	0.0364764	0.941346	No_Change
ENSMUSG00000000194	Gpr107	0.288737	0.00114309	No_Change
ENSMUSG00000000197	Nalcn	-3.70999	0.0099475	KO_down
ENSMUSG00000000202	Btbd17	0.0966613	0.691849	No_Change
ENSMUSG00000000204	Slfn4	-4.50631	0.00225298	KO_down
ENSMUSG00000000214	Th	1.01807	0.0691329	No_Change
ENSMUSG00000000216	Scnn1g	0.250861	0.352542	No_Change
ENSMUSG00000000223	Drp2	-0.852703	3.63541e-05	No_Change
ENSMUSG00000000244	Tspan32	-0.254177	0.522272	No_Change
ENSMUSG00000000247	Lhx2	-0.204118	0.594781	No_Change
ENSMUSG00000000248	Clec2g	-0.189594	0.346743	No_Change
ENSMUSG00000000253	Gmpr	0.723499	0.000342977	No_Change
ENSMUSG00000000266	Mid2	-0.426817	0.290111	No_Change
ENSMUSG00000000275	Trim25	-0.00431505	0.955295	No_Change
ENSMUSG00000000276	Dgke	-0.114125	0.354311	No_Change
ENSMUSG00000000278	Scpep1	-0.62697	6.98433e-42	No_Change
ENSMUSG00000000282	Mnt	0.489449	2.73263e-10	No_Change
ENSMUSG00000000290	Itgb2	0.0599369	0.87902	No_Change
ENSMUSG00000000295	Hddc2	-0.618173	3.94187e-05	No_Change
ENSMUSG00000000296	Tpd52l1	-0.0149938	0.938914	No_Change
ENSMUSG00000000301	Pemt	0.186195	0.638711	No_Change
ENSMUSG00000000303	Cdh1	0.243198	2.31909e-13	No_Change
ENSMUSG00000000305	Cdh4	1.82177	2.83129e-05	KO_up
ENSMUSG00000000308	Ckmt1	0.853179	1.42833e-10	No_Change
ENSMUSG00000000317	Bcl6b	-0.209429	0.396509	No_Change
ENSMUSG00000000318	Clec10a	0.167091	0.491366	No_Change
ENSMUSG00000000320	Alox12	-0.539412	0.220243	No_Change
ENSMUSG00000000325	NA	-0.454941	1.55485e-14	No_Change
ENSMUSG00000000326	Comt	-0.0941973	0.525233	No_Change
ENSMUSG00000000339	Rtca	-0.793556	3.1234e-13	No_Change
ENSMUSG00000000340	Dbt	-0.485283	2.1305e-07	No_Change
ENSMUSG00000000346	Dazap2	0.451659	2.7032e-11	No_Change
ENSMUSG00000000355	Mcts1	-0.352072	0.0799185	No_Change
ENSMUSG00000000359	Rem1	-0.00508225	NA	No_Change
ENSMUSG00000000365	Rnf17	0.00551372	0.968047	No_Change
ENSMUSG00000000374	Trappc10	0.494012	5.10947e-10	No_Change
ENSMUSG00000000378	Ccm2	1.2071	5.69223e-45	KO_up
ENSMUSG00000000384	Tbrg4	-0.0722564	0.483409	No_Change
ENSMUSG00000000385	Tmprss2	2.96569	2.06158e-38	KO_up
ENSMUSG00000000386	Mx1	0.568286	0.215773	No_Change
ENSMUSG00000000399	Ndufa9	0.167133	0.0342239	No_Change
ENSMUSG00000000402	Egfl6	0.229214	0.494877	No_Change
ENSMUSG00000000409	Lck	-0.446931	0.118547	No_Change
ENSMUSG00000000411	Tssk3	0.0136626	NA	No_Change
ENSMUSG00000000416	Cttnbp2	0.101109	0.826228	No_Change
ENSMUSG00000000420	Galnt1	0.107987	0.185484	No_Change
ENSMUSG00000000435	Myf5	-0.0727608	NA	No_Change
ENSMUSG00000000439	Mkrn2	0.0059758	0.965459	No_Change
ENSMUSG00000000440	Pparg	3.88742	2.05177e-24	KO_up
ENSMUSG00000000441	Raf1	0.285536	6.87971e-06	No_Change
ENSMUSG00000000486	Septin1	-4.85379	6.08814e-108	KO_down
ENSMUSG00000000489	Pdgfb	0.662101	0.00756105	No_Change
ENSMUSG00000000530	Acvrl1	0.621997	0.14646	No_Change
ENSMUSG00000000531	Tamalin	-0.589317	4.18457e-06	No_Change
ENSMUSG00000000532	Acvr1b	0.00881219	0.956294	No_Change
ENSMUSG00000000538	Tom1l2	1.16861	3.22714e-22	KO_up
ENSMUSG00000000544	Gpa33	-1.24051	1.70267e-18	KO_down
ENSMUSG00000000552	Zfp385a	-0.186453	0.0509359	No_Change
ENSMUSG00000000555	Itga5	1.01889	6.38933e-63	KO_up
ENSMUSG00000000560	Gabra2	0.070449	NA	No_Change
ENSMUSG00000000561	Wdr77	-0.0483942	0.551755	No_Change
ENSMUSG00000000562	Adora3	-0.0477625	NA	No_Change
ENSMUSG00000000563	Atp5pb	0.0575364	0.282611	No_Change
ENSMUSG00000000567	Sox9	1.94002	4.40033e-11	KO_up
ENSMUSG00000000568	Hnrnpd	-0.616464	5.70849e-43	No_Change
ENSMUSG00000000579	Dynlt1c	-0.105343	NA	No_Change
ENSMUSG00000000581	C1d	0.128488	0.485879	No_Change
ENSMUSG00000000594	Gm2a	1.61373	0	KO_up
ENSMUSG00000000600	Krit1	0.469798	5.14418e-05	No_Change
ENSMUSG00000000605	Clcn4	1.03106	1.3209e-06	KO_up
ENSMUSG00000000627	Sema4f	-0.402371	0.258272	No_Change
ENSMUSG00000000628	Hk2	-0.733923	1.57339e-90	No_Change
ENSMUSG00000000631	Myo18a	0.848307	1.04107e-55	No_Change
ENSMUSG00000000632	Sez6	3.5834	7.84037e-19	KO_up
ENSMUSG00000000673	Haao	0.165553	0.625993	No_Change
ENSMUSG00000000682	Cd52	0.184492	0.467429	No_Change
ENSMUSG00000000686	Abhd15	0.14791	0.752085	No_Change
ENSMUSG00000000690	Hoxb6	-0.0413687	NA	No_Change
ENSMUSG00000000693	Loxl3	-0.347695	0.421535	No_Change
ENSMUSG00000000706	Btn1a1	-0.322707	0.459189	No_Change
ENSMUSG00000000708	Kat2b	0.419692	2.08839e-06	No_Change
ENSMUSG00000000711	Rab5b	0.197178	0.00485505	No_Change
ENSMUSG00000000724	Cryba1	-0.0413687	NA	No_Change
ENSMUSG00000000730	Dnmt3l	-1.35869	3.46207e-70	KO_down
ENSMUSG00000000731	Aire	-1.19715	5.28456e-20	KO_down
ENSMUSG00000000732	Icosl	-0.43814	0.00975864	No_Change
ENSMUSG00000000738	Spg7	0.218509	0.042652	No_Change
ENSMUSG00000000739	Sult5a1	0.914877	0.0285271	No_Change
ENSMUSG00000000740	Rpl13	-0.352914	1.95937e-50	No_Change
ENSMUSG00000000743	Chmp1a	0.231018	0.00141254	No_Change
ENSMUSG00000000751	Rpa1	-0.370329	7.9814e-19	No_Change
ENSMUSG00000000753	Serpinf1	2.48958	0.000123871	KO_up
ENSMUSG00000000759	Tubgcp3	0.162634	0.22163	No_Change
ENSMUSG00000000776	Polr3d	-0.140044	0.346495	No_Change
ENSMUSG00000000782	Tcf7	-1.7467	2.60315e-68	KO_down
ENSMUSG00000000787	Ddx3x	0.219634	6.70773e-13	No_Change
ENSMUSG00000000791	Il12rb1	-0.396799	0.288016	No_Change
ENSMUSG00000000792	Slc5a5	1.66812	3.81653e-07	KO_up
ENSMUSG00000000794	Kcnn3	1.51635	0.00509374	KO_up
ENSMUSG00000000804	Usp32	0.436672	3.58401e-12	No_Change
ENSMUSG00000000805	Car4	3.05431	2.68736e-114	KO_up
ENSMUSG00000000811	Txnrd3	0.0513375	0.84978	No_Change
ENSMUSG00000000817	Fasl	0.334124	0.0829132	No_Change
ENSMUSG00000000823	Zfp512b	0.974028	1.03456e-21	No_Change
ENSMUSG00000000826	Dnajc5	0.523968	6.17002e-17	No_Change
ENSMUSG00000000827	Tpd52l2	-0.199067	0.0140791	No_Change
ENSMUSG00000000838	Fmr1	-0.519185	5.61124e-14	No_Change
ENSMUSG00000000861	Bcl11a	0.157088	0.709085	No_Change
ENSMUSG00000000876	Pxmp4	0.0943956	0.694487	No_Change
ENSMUSG00000000881	Dlg3	0.862121	1.37014e-41	No_Change
ENSMUSG00000000884	Gnb1l	-0.586606	0.0033349	No_Change
ENSMUSG00000000901	Mmp11	-0.616911	1.31997e-05	No_Change
ENSMUSG00000000902	Smarcb1	0.321195	0.000987318	No_Change
ENSMUSG00000000903	Vpreb3	-0.574318	0.086627	No_Change
ENSMUSG00000000915	Hip1r	-0.831969	2.95175e-17	No_Change
ENSMUSG00000000916	Nsun5	-0.18605	0.340538	No_Change
ENSMUSG00000000934	Top1mt	0.611076	3.86908e-05	No_Change
ENSMUSG00000000938	Hoxa10	-0.546919	0.11155	No_Change
ENSMUSG00000000942	Hoxa4	0.220914	0.516666	No_Change
ENSMUSG00000000948	Gm38393	0.027301	0.756137	No_Change
ENSMUSG00000000957	Mmp14	-0.0735462	0.870568	No_Change
ENSMUSG00000000958	Slc7a7	-0.0936988	0.763625	No_Change
ENSMUSG00000000959	Oxa1l	-0.14946	0.107455	No_Change
ENSMUSG00000000976	Heatr6	0.106594	0.450014	No_Change
ENSMUSG00000000982	Ccl3	0.151626	0.450944	No_Change
ENSMUSG00000001014	Icam4	-0.184692	0.631374	No_Change
ENSMUSG00000001016	Ilf2	-0.395767	1.06334e-10	No_Change
ENSMUSG00000001017	Chtop	-0.836881	6.01399e-44	No_Change
ENSMUSG00000001018	Snapin	0.218367	0.0452294	No_Change
ENSMUSG00000001020	S100a4	0.0352895	NA	No_Change
ENSMUSG00000001021	S100a3	0.0353821	NA	No_Change
ENSMUSG00000001025	S100a6	0.910759	2.48335e-06	No_Change
ENSMUSG00000001027	Scn4a	0.17921	0.480605	No_Change
ENSMUSG00000001034	Mapk7	-0.322405	0.0192627	No_Change
ENSMUSG00000001036	Epn2	-0.0989051	0.179476	No_Change
ENSMUSG00000001039	B9d1	0.29586	0.20711	No_Change
ENSMUSG00000001052	Sec24b	0.595897	1.83898e-12	No_Change
ENSMUSG00000001053	N4bp3	-1.06597	2.16078e-09	KO_down
ENSMUSG00000001054	Rmnd5b	-0.396578	0.0134814	No_Change
ENSMUSG00000001056	Nhp2	-0.627514	8.35817e-21	No_Change
ENSMUSG00000001062	Vps9d1	0.404417	0.0288464	No_Change
ENSMUSG00000001065	Zfp276	0.400992	0.0890503	No_Change
ENSMUSG00000001076	C1ql4	-0.451607	0.301954	No_Change
ENSMUSG00000001082	Mfsd10	-0.947372	2.36511e-19	No_Change
ENSMUSG00000001089	Luzp1	0.213856	0.000384766	No_Change
ENSMUSG00000001095	Slc13a2	0.921689	0.0535031	No_Change
ENSMUSG00000001098	Kctd10	0.746604	6.11272e-15	No_Change
ENSMUSG00000001100	Poldip2	-0.293465	0.00113402	No_Change
ENSMUSG00000001103	Sebox	-0.0413687	NA	No_Change
ENSMUSG00000001105	Ift20	-0.119052	0.502991	No_Change
ENSMUSG00000001119	Col6a1	0.903241	0.0547654	No_Change
ENSMUSG00000001120	Pcbp3	-0.276688	0.156803	No_Change
ENSMUSG00000001123	Lgals9	2.84705	1.67955e-91	KO_up
ENSMUSG00000001127	Araf	0.378461	4.51615e-07	No_Change
ENSMUSG00000001128	Cfp	-0.137111	0.66968	No_Change
ENSMUSG00000001131	Timp1	-0.984313	5.42711e-09	No_Change
ENSMUSG00000001134	Uxt	-0.313329	0.151114	No_Change
ENSMUSG00000001138	Cnnm3	0.550801	2.38677e-06	No_Change
ENSMUSG00000001143	Lman2l	0.75155	9.77738e-08	No_Change
ENSMUSG00000001150	Mcm3ap	-0.92113	4.06715e-56	No_Change
ENSMUSG00000001151	Pcnt	-0.376203	7.807e-12	No_Change
ENSMUSG00000001155	Ftcd	0.0175459	NA	No_Change
ENSMUSG00000001156	Mxd1	0.572065	0.00231737	No_Change
ENSMUSG00000001157	Gmcl1	0.0570196	0.685709	No_Change
ENSMUSG00000001158	Snrnp27	-0.3078	0.00285037	No_Change
ENSMUSG00000001166	Oas1c	1.47352	3.77629e-15	KO_up
ENSMUSG00000001168	Oas1h	-0.329211	0.385423	No_Change
ENSMUSG00000001173	Ocrl	-0.211283	0.0335244	No_Change
ENSMUSG00000001175	Calm1	0.777077	3.23699e-79	No_Change
ENSMUSG00000001211	Agpat3	-0.220819	0.0777995	No_Change
ENSMUSG00000001225	Slc26a3	-0.0419627	NA	No_Change
ENSMUSG00000001227	Sema6b	-0.00719339	0.98303	No_Change
ENSMUSG00000001228	Uhrf1	-0.722602	1.3472e-104	No_Change
ENSMUSG00000001229	Dpp9	0.0740552	0.592425	No_Change
ENSMUSG00000001240	Ramp2	-0.229138	0.348331	No_Change
ENSMUSG00000001247	Lsr	0.515018	1.78591e-06	No_Change
ENSMUSG00000001248	Gramd1a	0.33143	3.82487e-05	No_Change
ENSMUSG00000001249	Hpn	0.410316	0.0452522	No_Change
ENSMUSG00000001260	Gabrg1	-0.047308	NA	No_Change
ENSMUSG00000001270	Ckb	-0.665262	8.47772e-84	No_Change
ENSMUSG00000001280	Sp1	-0.161782	0.000350929	No_Change
ENSMUSG00000001281	Itgb7	-1.23834	4.87902e-06	KO_down
ENSMUSG00000001285	Myg1	0.0386873	0.843012	No_Change
ENSMUSG00000001288	Rarg	-1.07392	3.39977e-28	KO_down
ENSMUSG00000001289	Pfdn5	-0.000483753	0.996868	No_Change
ENSMUSG00000001300	Efnb2	0.0467623	0.828693	No_Change
ENSMUSG00000001305	Rrp15	-0.353257	0.000386411	No_Change
ENSMUSG00000001313	Rnd2	-0.922079	1.24717e-11	No_Change
ENSMUSG00000001323	Srr	2.15718	2.96903e-24	KO_up
ENSMUSG00000001333	Sync	0.406393	0.0231593	No_Change
ENSMUSG00000001334	Fndc5	0.407843	0.337197	No_Change
ENSMUSG00000001348	Acp5	-0.214104	0.148653	No_Change
ENSMUSG00000001349	Cnn1	-0.798331	0.0802379	No_Change
ENSMUSG00000001366	Fbxo9	0.298371	0.118784	No_Change
ENSMUSG00000001376	Vps50	-0.381452	7.25971e-05	No_Change
ENSMUSG00000001379	NA	0.234592	0.279826	No_Change
ENSMUSG00000001380	Hars	0.0296355	0.777226	No_Change
ENSMUSG00000001383	Zmat2	-0.219834	0.00993974	No_Change
ENSMUSG00000001403	Ube2c	-0.807383	2.07382e-38	No_Change
ENSMUSG00000001415	Smg5	-0.348047	3.04203e-10	No_Change
ENSMUSG00000001416	Cct3	-0.460022	5.16579e-36	No_Change
ENSMUSG00000001417	NA	-0.839287	0.087999	No_Change
ENSMUSG00000001418	Glmp	0.246971	0.00166978	No_Change
ENSMUSG00000001419	Mef2d	1.06738	8.33231e-91	KO_up
ENSMUSG00000001420	Tmem79	0.0113212	0.984933	No_Change
ENSMUSG00000001424	Snd1	0.193186	8.22357e-06	No_Change
ENSMUSG00000001435	Col18a1	-1.84379	2.12135e-262	KO_down
ENSMUSG00000001436	Slc19a1	0.235285	0.201759	No_Change
ENSMUSG00000001440	Kpnb1	-0.53855	1.04895e-87	No_Change
ENSMUSG00000001441	Npepps	-0.0733988	0.118277	No_Change
ENSMUSG00000001444	Tbx21	-4.09816	2.32306e-05	KO_down
ENSMUSG00000001445	Mrpl10	0.143711	0.140789	No_Change
ENSMUSG00000001467	Cyp51	-0.90108	3.28067e-36	No_Change
ENSMUSG00000001472	Tcf25	0.560617	2.12846e-28	No_Change
ENSMUSG00000001473	Tubb6	0.883525	2.45423e-43	No_Change
ENSMUSG00000001482	Def8	-0.888258	1.43929e-20	No_Change
ENSMUSG00000001493	Meox1	0.0431797	NA	No_Change
ENSMUSG00000001494	Sost	-0.047308	NA	No_Change
ENSMUSG00000001497	Pax9	-0.671252	0.155803	No_Change
ENSMUSG00000001504	Irx2	-0.139292	0.746185	No_Change
ENSMUSG00000001506	Col1a1	-0.182453	0.683556	No_Change
ENSMUSG00000001507	Itga3	-0.0106534	0.93293	No_Change
ENSMUSG00000001508	Sgca	-0.047308	NA	No_Change
ENSMUSG00000001510	Dlx3	2.65566	8.12959e-114	KO_up
ENSMUSG00000001517	Foxm1	-0.0902284	0.444411	No_Change
ENSMUSG00000001518	Itfg2	-1.18801	2.71208e-12	KO_down
ENSMUSG00000001520	Nrip2	0.0969776	NA	No_Change
ENSMUSG00000001521	Tulp3	-0.531329	5.90341e-10	No_Change
ENSMUSG00000001524	Gtf2h4	-0.21082	0.132651	No_Change
ENSMUSG00000001525	Tubb5	-0.09715	1.39451e-05	No_Change
ENSMUSG00000001542	Ell2	-1.14989	1.12934e-26	KO_down
ENSMUSG00000001552	Jup	-0.926291	4.57731e-32	No_Change
ENSMUSG00000001555	Fkbp10	0.106365	0.816572	No_Change
ENSMUSG00000001558	Klhl10	0.0616062	0.898593	No_Change
ENSMUSG00000001566	Mnx1	-1.15934	0.0363664	KO_down
ENSMUSG00000001569	Nom1	0.0987721	0.463784	No_Change
ENSMUSG00000001576	Ergic1	0.250652	0.000694145	No_Change
ENSMUSG00000001583	Tnk1	-0.610435	0.00863302	No_Change
ENSMUSG00000001588	Acap1	-0.52477	0.106376	No_Change
ENSMUSG00000001604	Tcea3	0.258985	0.0569575	No_Change
ENSMUSG00000001622	Csn3	-0.00638576	NA	No_Change
ENSMUSG00000001627	Ifrd1	-0.309143	0.00172784	No_Change
ENSMUSG00000001630	Stk38l	-0.180786	0.213624	No_Change
ENSMUSG00000001632	Brpf1	0.425524	1.27202e-05	No_Change
ENSMUSG00000001642	Akr1b3	-1.02253	3.83176e-44	KO_down
ENSMUSG00000001655	Hoxc13	-0.609159	0.0256478	No_Change
ENSMUSG00000001656	Hoxc11	-0.122244	NA	No_Change
ENSMUSG00000001657	Hoxc8	-0.047308	NA	No_Change
ENSMUSG00000001661	Hoxc6	-0.257396	0.114034	No_Change
ENSMUSG00000001663	Gstt1	0.8762	0.00270196	No_Change
ENSMUSG00000001665	Gstt3	1.54073	8.5669e-11	KO_up
ENSMUSG00000001666	Ddt	-0.434143	0.000209373	No_Change
ENSMUSG00000001670	Tat	-0.419376	0.206398	No_Change
ENSMUSG00000001672	Marveld3	2.75114	1.11287e-13	KO_up
ENSMUSG00000001674	Ddx18	-0.878525	1.25335e-31	No_Change
ENSMUSG00000001687	Ubl3	-0.160315	0.172926	No_Change
ENSMUSG00000001700	Gramd3	1.47683	6.06471e-10	KO_up
ENSMUSG00000001707	Eef1e1	-0.516003	8.5201e-08	No_Change
ENSMUSG00000001729	Akt1	1.69006	1.427e-128	KO_up
ENSMUSG00000001739	Cldn15	0.0133949	NA	No_Change
ENSMUSG00000001741	Il16	-0.0659941	0.816524	No_Change
ENSMUSG00000001750	Tcirg1	1.02058	1.62441e-27	KO_up
ENSMUSG00000001751	Naglu	1.07521	0.00711548	KO_up
ENSMUSG00000001755	Coasy	0.0957008	0.575495	No_Change
ENSMUSG00000001761	Smo	-0.595031	0.000744921	No_Change
ENSMUSG00000001763	Tspan33	0.0904825	0.780997	No_Change
ENSMUSG00000001767	Crnkl1	-0.387084	0.00052783	No_Change
ENSMUSG00000001768	Rin2	0.439022	0.0602037	No_Change
ENSMUSG00000001773	Folh1	-0.164774	NA	No_Change
ENSMUSG00000001774	Chordc1	0.164081	0.138748	No_Change
ENSMUSG00000001783	Rtcb	-0.0825081	0.244246	No_Change
ENSMUSG00000001785	Pwp1	-0.351041	4.56249e-06	No_Change
ENSMUSG00000001786	Fbxo7	-0.42363	0.00329769	No_Change
ENSMUSG00000001794	Capns1	-0.426743	1.17656e-25	No_Change
ENSMUSG00000001802	Lrp3	-3.1225	8.55014e-06	KO_down
ENSMUSG00000001804	Dsg4	0.0432202	NA	No_Change
ENSMUSG00000001819	Hoxd13	-3.18749	0.000405296	KO_down
ENSMUSG00000001827	Folr1	0.101221	0.431534	No_Change
ENSMUSG00000001829	Clpb	0.0829335	0.28508	No_Change
ENSMUSG00000001833	Septin7	0.142248	0.00841286	No_Change
ENSMUSG00000001844	Zdhhc4	-0.264085	0.181892	No_Change
ENSMUSG00000001847	Rac1	0.221018	0.000822093	No_Change
ENSMUSG00000001855	Nup214	0.115791	0.0956678	No_Change
ENSMUSG00000001864	Aif1l	-0.444369	0.0022403	No_Change
ENSMUSG00000001870	Ltbp1	-1.1346	4.64464e-07	KO_down
ENSMUSG00000001891	Ugp2	0.831332	8.39709e-23	No_Change
ENSMUSG00000001901	Kcnh6	-0.373557	0.342938	No_Change
ENSMUSG00000001909	Trmt1	-0.205248	0.00483569	No_Change
ENSMUSG00000001910	Nacc1	-0.539121	7.23565e-26	No_Change
ENSMUSG00000001911	Nfix	0.359335	0.147975	No_Change
ENSMUSG00000001918	Slc1a5	-0.119505	0.198699	No_Change
ENSMUSG00000001924	Uba1	-0.247536	2.09569e-17	No_Change
ENSMUSG00000001930	Vwf	-1.80575	5.43656e-23	KO_down
ENSMUSG00000001942	Siae	0.610137	6.28979e-05	No_Change
ENSMUSG00000001943	Vsig2	-0.0769873	0.802302	No_Change
ENSMUSG00000001946	Esam	0.510701	0.249054	No_Change
ENSMUSG00000001948	Spa17	-0.014252	0.977392	No_Change
ENSMUSG00000001962	Fam50a	-0.10524	0.158007	No_Change
ENSMUSG00000001964	Emd	0.0783935	0.298784	No_Change
ENSMUSG00000001983	Taco1	0.458999	0.0806349	No_Change
ENSMUSG00000001985	Grik3	-0.609626	7.72032e-07	No_Change
ENSMUSG00000001986	Gria3	-0.459566	0.300507	No_Change
ENSMUSG00000001988	Npas1	0.0353821	NA	No_Change
ENSMUSG00000001995	Sipa1l2	-0.532103	4.26242e-23	No_Change
ENSMUSG00000001998	Ap4e1	0.40188	0.00202001	No_Change
ENSMUSG00000001999	Blvra	0.494656	0.0395663	No_Change
ENSMUSG00000002006	Pdzd4	-2.35083	1.54727e-26	KO_down
ENSMUSG00000002007	Srpk3	3.79096	9.49471e-07	KO_up
ENSMUSG00000002010	Idh3g	-0.297462	6.6046e-08	No_Change
ENSMUSG00000002012	Pnck	-0.00151855	0.996023	No_Change
ENSMUSG00000002014	Ssr4	0.240787	0.00185282	No_Change
ENSMUSG00000002015	Bcap31	0.172939	0.0103541	No_Change
ENSMUSG00000002017	Fam98a	0.103821	0.43326	No_Change
ENSMUSG00000002020	Ltbp2	-1.06804	0.0154274	KO_down
ENSMUSG00000002028	Kmt2a	0.835012	3.43994e-55	No_Change
ENSMUSG00000002031	Ift46	0.272743	0.00753633	No_Change
ENSMUSG00000002032	Tmem25	0.414339	0.282651	No_Change
ENSMUSG00000002033	Cd3g	-0.239351	0.27181	No_Change
ENSMUSG00000002043	Trappc6a	0.95221	4.03288e-09	No_Change
ENSMUSG00000002052	Supt6	0.349598	2.93055e-14	No_Change
ENSMUSG00000002055	Spag5	-0.289779	0.000121833	No_Change
ENSMUSG00000002057	Foxn1	0.0352895	NA	No_Change
ENSMUSG00000002058	Unc119	0.659601	2.62669e-11	No_Change
ENSMUSG00000002059	Rab34	-1.21158	7.80111e-08	KO_down
ENSMUSG00000002064	Sdf2	0.199087	0.191339	No_Change
ENSMUSG00000002068	Ccne1	-0.284447	0.00124827	No_Change
ENSMUSG00000002076	Hsf2bp	-1.94209	3.37036e-49	KO_down
ENSMUSG00000002083	Bbc3	-0.592945	1.35267e-08	No_Change
ENSMUSG00000002100	Mybpc3	3.07593	2.38079e-12	KO_up
ENSMUSG00000002102	Psmc3	0.40341	5.91067e-15	No_Change
ENSMUSG00000002103	Acp2	1.1188	9.89166e-12	KO_up
ENSMUSG00000002104	Rapsn	-1.60884	0.000689195	KO_down
ENSMUSG00000002105	Slc39a13	0.000892728	0.998378	No_Change
ENSMUSG00000002107	Celf2	-0.475125	0.134405	No_Change
ENSMUSG00000002108	Nr1h3	-0.158943	0.644145	No_Change
ENSMUSG00000002109	Ddb2	0.0547292	0.813531	No_Change
ENSMUSG00000002111	Spi1	1.05984	0.0399474	KO_up
ENSMUSG00000002129	Sf3a1	0.0344101	0.634138	No_Change
ENSMUSG00000002147	Stat6	0.157977	0.25028	No_Change
ENSMUSG00000002190	Clgn	-2.96192	8.70135e-45	KO_down
ENSMUSG00000002204	Napsa	-5.40247	0.00102199	KO_down
ENSMUSG00000002205	Vrk3	0.665201	1.18795e-10	No_Change
ENSMUSG00000002210	Smg9	-0.332189	0.0651036	No_Change
ENSMUSG00000002221	Paxip1	-0.438589	2.17328e-09	No_Change
ENSMUSG00000002222	Rmnd5a	-0.192885	0.000781433	No_Change
ENSMUSG00000002227	Mov10	-0.658321	5.84362e-40	No_Change
ENSMUSG00000002228	Ppm1j	0.117932	0.466017	No_Change
ENSMUSG00000002233	Rhoc	0.921327	9.00738e-26	No_Change
ENSMUSG00000002249	Tead3	1.43388	1.71948e-31	KO_up
ENSMUSG00000002250	Ppard	0.679593	4.63672e-17	No_Change
ENSMUSG00000002257	Def6	-0.581212	0.00263248	No_Change
ENSMUSG00000002265	Peg3	1.98546	0	KO_up
ENSMUSG00000002266	Zim1	0.119126	0.795791	No_Change
ENSMUSG00000002274	Metrn	-1.41218	2.32101e-10	KO_down
ENSMUSG00000002279	Lmf1	0.0754177	0.830152	No_Change
ENSMUSG00000002280	Ciao3	0.043059	0.860008	No_Change
ENSMUSG00000002289	Angptl4	-0.519548	0.0079103	No_Change
ENSMUSG00000002290	NA	-0.116845	0.777282	No_Change
ENSMUSG00000002297	Dbf4	-0.34765	1.32639e-07	No_Change
ENSMUSG00000002307	Daxx	0.321189	0.000204682	No_Change
ENSMUSG00000002308	Cd320	0.207175	0.155878	No_Change
ENSMUSG00000002319	Ipo4	-0.28971	0.000178962	No_Change
ENSMUSG00000002320	Tm9sf1	0.571861	2.21176e-05	No_Change
ENSMUSG00000002324	Rec8	1.34143	3.45736e-98	KO_up
ENSMUSG00000002325	Irf9	1.12912	6.05726e-10	KO_up
ENSMUSG00000002326	Gmpr2	0.067966	0.806129	No_Change
ENSMUSG00000002329	Mdp1	-0.37686	0.0256864	No_Change
ENSMUSG00000002332	Dhrs1	-0.152726	0.409814	No_Change
ENSMUSG00000002341	Ncan	-1.2757	0.0325072	KO_down
ENSMUSG00000002342	Tmem161a	0.425903	1.27388e-05	No_Change
ENSMUSG00000002343	Armc6	0.248824	0.212602	No_Change
ENSMUSG00000002345	Borcs8	0.661532	0.00836615	No_Change
ENSMUSG00000002346	Slc25a42	-0.0966414	0.568989	No_Change
ENSMUSG00000002365	Snx9	2.18367	6.93218e-71	KO_up
ENSMUSG00000002372	Ranbp3	-0.324958	3.56925e-06	No_Change
ENSMUSG00000002379	Ndufa11	-0.373768	2.25196e-05	No_Change
ENSMUSG00000002384	Bmp8b	2.83699	4.149e-32	KO_up
ENSMUSG00000002393	Nr2f6	1.03659	5.33586e-20	KO_up
ENSMUSG00000002395	Use1	-0.0394881	0.812922	No_Change
ENSMUSG00000002396	Ocel1	0.217709	0.471045	No_Change
ENSMUSG00000002409	Dyrk1b	0.80817	9.5667e-07	No_Change
ENSMUSG00000002413	Braf	0.09133	0.316825	No_Change
ENSMUSG00000002416	Ndufb2	-0.369341	0.0150435	No_Change
ENSMUSG00000002428	Hltf	-0.377379	7.76965e-06	No_Change
ENSMUSG00000002455	Prpf6	-0.0499751	0.536283	No_Change
ENSMUSG00000002458	Rgs19	0.15183	0.672214	No_Change
ENSMUSG00000002475	Abhd3	1.35911	1.12714e-07	KO_up
ENSMUSG00000002477	Snrpd1	-0.638541	1.49094e-14	No_Change
ENSMUSG00000002486	Tchp	-0.186005	0.226747	No_Change
ENSMUSG00000002489	Tiam1	-1.22546	2.73034e-37	KO_down
ENSMUSG00000002496	Tsc2	-0.0720524	0.340511	No_Change
ENSMUSG00000002500	Rpl3l	-1.76428	0.000845924	KO_down
ENSMUSG00000002504	Slc9a3r2	-0.429459	0.00615111	No_Change
ENSMUSG00000002524	Puf60	0.0739914	0.302375	No_Change
ENSMUSG00000002546	Golga2	0.48616	3.52782e-13	No_Change
ENSMUSG00000002550	Uck1	-0.061165	0.645324	No_Change
ENSMUSG00000002565	Scin	1.92685	0.0315957	KO_up
ENSMUSG00000002578	Ikzf4	0.0925155	0.804178	No_Change
ENSMUSG00000002580	Mien1	-0.0658823	0.680931	No_Change
ENSMUSG00000002602	Axl	-1.84918	0.000355037	KO_down
ENSMUSG00000002603	Tgfb1	0.443578	0.152943	No_Change
ENSMUSG00000002608	Ccdc97	0.508199	7.01779e-07	No_Change
ENSMUSG00000002617	Zfp40	0.953644	0.000795517	No_Change
ENSMUSG00000002625	Akap8l	-0.213874	0.0181097	No_Change
ENSMUSG00000002633	Shh	-0.0495644	NA	No_Change
ENSMUSG00000002635	Pdcd2l	-0.236674	0.0563721	No_Change
ENSMUSG00000002658	Gtf2f1	0.349938	4.66126e-07	No_Change
ENSMUSG00000002660	Clpp	-0.336985	0.000373983	No_Change
ENSMUSG00000002661	Alkbh7	-0.473746	0.014306	No_Change
ENSMUSG00000002668	Dennd1c	-0.0188421	0.973078	No_Change
ENSMUSG00000002679	Med6	0.213032	0.243815	No_Change
ENSMUSG00000002688	Prkd1	0.048524	0.9189	No_Change
ENSMUSG00000002699	Lcp2	-0.152043	NA	No_Change
ENSMUSG00000002718	Cse1l	-0.392422	2.90852e-14	No_Change
ENSMUSG00000002728	Naa20	0.0199425	0.894544	No_Change
ENSMUSG00000002731	Prkra	0.878271	1.72978e-08	No_Change
ENSMUSG00000002732	Fkbp7	0.224312	0.570189	No_Change
ENSMUSG00000002733	Plekha3	0.0945177	0.593591	No_Change
ENSMUSG00000002741	Ykt6	0.00452705	0.977101	No_Change
ENSMUSG00000002748	Baz1b	-0.158773	0.00331537	No_Change
ENSMUSG00000002763	Pex6	1.06182	2.86535e-23	KO_up
ENSMUSG00000002767	Mrpl2	-0.591745	1.51514e-13	No_Change
ENSMUSG00000002768	Mea1	0.430729	3.84061e-06	No_Change
ENSMUSG00000002769	Gnmt	-0.840947	0.0768532	No_Change
ENSMUSG00000002771	Grin2d	2.60112	3.64926e-10	KO_up
ENSMUSG00000002778	Kdelr1	0.244324	0.00196934	No_Change
ENSMUSG00000002781	Tmem143	-0.442341	0.0123889	No_Change
ENSMUSG00000002791	Pdxk-ps	-0.0210973	NA	No_Change
ENSMUSG00000002797	Ggct	-0.775621	0.000723523	No_Change
ENSMUSG00000002799	Jag2	0.00556932	0.978203	No_Change
ENSMUSG00000002803	Btbd6	0.418897	0.0832428	No_Change
ENSMUSG00000002804	Nudt14	-0.0912295	0.73001	No_Change
ENSMUSG00000002808	Epdr1	-1.97563	9.28003e-06	KO_down
ENSMUSG00000002812	Flii	0.794219	4.68278e-45	No_Change
ENSMUSG00000002814	Top3a	-0.0465505	0.779062	No_Change
ENSMUSG00000002820	Atg4d	0.316982	0.000922228	No_Change
ENSMUSG00000002825	Qtrt1	-1.07054	7.52781e-16	KO_down
ENSMUSG00000002831	Plin4	0.377366	0.383789	No_Change
ENSMUSG00000002833	Hdgfl2	-0.187365	0.00116833	No_Change
ENSMUSG00000002835	Chaf1a	-0.0850387	0.31173	No_Change
ENSMUSG00000002844	Adprh	-0.39987	1.98652e-10	No_Change
ENSMUSG00000002845	Tmem39a	-0.678078	1.84761e-16	No_Change
ENSMUSG00000002846	Timmdc1	0.315047	0.0254922	No_Change
ENSMUSG00000002847	Pla1a	-3.00683	9.35278e-19	KO_down
ENSMUSG00000002870	Mcm2	-0.611454	6.33324e-66	No_Change
ENSMUSG00000002871	Tpra1	0.608913	3.62101e-05	No_Change
ENSMUSG00000002881	Nab1	1.21292	7.00791e-14	KO_up
ENSMUSG00000002885	Adgre5	-0.0926667	0.219317	No_Change
ENSMUSG00000002897	Il17ra	0.313399	0.111306	No_Change
ENSMUSG00000002900	Lamb1	0.182999	0.00279425	No_Change
ENSMUSG00000002908	Kcnn1	-0.387741	0.120505	No_Change
ENSMUSG00000002910	Arrdc2	-0.957725	3.8867e-16	No_Change
ENSMUSG00000002944	Cd36	0.0519944	NA	No_Change
ENSMUSG00000002948	Map2k7	-0.0598121	0.62468	No_Change
ENSMUSG00000002949	Timm44	-0.0771223	0.397909	No_Change
ENSMUSG00000002957	Ap2a2	0.218773	3.28442e-07	No_Change
ENSMUSG00000002963	Pnkp	0.0112488	0.960332	No_Change
ENSMUSG00000002968	Med25	-0.279761	2.44649e-05	No_Change
ENSMUSG00000002980	Bcam	-0.0126227	0.915181	No_Change
ENSMUSG00000002981	Clptm1	0.361048	4.19263e-10	No_Change
ENSMUSG00000002983	Relb	-0.42067	0.00531061	No_Change
ENSMUSG00000002984	Tomm40	-0.336445	2.46793e-06	No_Change
ENSMUSG00000002985	Apoe	-1.94428	0	KO_down
ENSMUSG00000002992	Apoc2	-0.0822322	NA	No_Change
ENSMUSG00000002996	Hbp1	0.32715	0.000273841	No_Change
ENSMUSG00000002997	Prkar2b	0.152533	0.482058	No_Change
ENSMUSG00000003031	Cdkn1b	0.333373	2.7402e-05	No_Change
ENSMUSG00000003032	Klf4	-1.84486	3.27736e-129	KO_down
ENSMUSG00000003033	Ap1m1	-0.0317851	0.826132	No_Change
ENSMUSG00000003037	Rab8a	0.686419	1.01438e-17	No_Change
ENSMUSG00000003038	Hmgn2	0.382076	0.000120416	No_Change
ENSMUSG00000003039	Fam32a	0.46814	5.9203e-06	No_Change
ENSMUSG00000003051	Elf3	1.50054	8.46748e-176	KO_up
ENSMUSG00000003062	Stard3nl	-0.601442	9.49296e-10	No_Change
ENSMUSG00000003068	Stk11	0.203541	0.00534411	No_Change
ENSMUSG00000003070	Efna2	-0.103595	0.732317	No_Change
ENSMUSG00000003072	Atp5d	-0.165468	0.00302125	No_Change
ENSMUSG00000003099	Ppp5c	-0.614873	1.27775e-21	No_Change
ENSMUSG00000003119	Cdk12	0.278109	0.000599424	No_Change
ENSMUSG00000003123	Lipe	-1.01956	1.93883e-05	KO_down
ENSMUSG00000003131	Pafah1b2	0.122754	0.282233	No_Change
ENSMUSG00000003134	Tbc1d8	-0.114747	0.252049	No_Change
ENSMUSG00000003135	Cnot11	-0.27985	0.00938202	No_Change
ENSMUSG00000003153	Slc2a3	-0.0956437	2.50058e-06	No_Change
ENSMUSG00000003154	Foxj2	1.15102	3.89535e-28	KO_up
ENSMUSG00000003161	Sri	1.835	6.50508e-69	KO_up
ENSMUSG00000003166	Dgcr2	-0.0474602	0.747051	No_Change
ENSMUSG00000003178	NA	0.682349	2.9269e-12	No_Change
ENSMUSG00000003184	Irf3	0.227038	0.154339	No_Change
ENSMUSG00000003190	Bcl2l12	0.00483896	0.98781	No_Change
ENSMUSG00000003198	Zfp959	0.143057	0.757483	No_Change
ENSMUSG00000003199	Mpnd	-0.431072	0.0159787	No_Change
ENSMUSG00000003200	Sh3gl1	0.300148	0.00075295	No_Change
ENSMUSG00000003206	Ebi3	-0.0849024	NA	No_Change
ENSMUSG00000003208	Yju2	0.571188	0.00483087	No_Change
ENSMUSG00000003226	Ranbp2	0.198978	2.39703e-05	No_Change
ENSMUSG00000003227	Edar	0.0432202	NA	No_Change
ENSMUSG00000003228	Grk5	-0.372815	0.226383	No_Change
ENSMUSG00000003233	Dvl3	1.37294	3.58344e-61	KO_up
ENSMUSG00000003234	Abcf3	0.584463	1.40065e-12	No_Change
ENSMUSG00000003235	Eif2b5	-0.337547	3.62256e-08	No_Change
ENSMUSG00000003269	Cyth2	0.564625	3.21352e-10	No_Change
ENSMUSG00000003271	Sult2b1	-1.27445	0.00635197	KO_down
ENSMUSG00000003273	Car11	0.240664	0.589038	No_Change
ENSMUSG00000003279	Dlgap1	-2.81637	1.35608e-05	KO_down
ENSMUSG00000003282	Plag1	-0.230577	0.215153	No_Change
ENSMUSG00000003283	Hck	-0.0281861	0.939927	No_Change
ENSMUSG00000003299	Mrpl4	-0.156142	0.105558	No_Change
ENSMUSG00000003308	Keap1	1.15309	7.06625e-22	KO_up
ENSMUSG00000003309	Ap1m2	1.09734	6.12835e-05	KO_up
ENSMUSG00000003316	Glg1	0.112975	0.0135139	No_Change
ENSMUSG00000003341	Atp8b3	1.05105	0.00854964	KO_up
ENSMUSG00000003344	Btbd2	-0.427303	6.78444e-07	No_Change
ENSMUSG00000003345	Csnk1g2	0.30755	0.00845522	No_Change
ENSMUSG00000003346	Abhd17a	-0.0654922	0.622291	No_Change
ENSMUSG00000003348	Mob3a	0.844256	2.50355e-11	No_Change
ENSMUSG00000003352	Cacnb3	0.961867	7.25926e-31	No_Change
ENSMUSG00000003354	Ccdc65	-0.430734	0.323705	No_Change
ENSMUSG00000003355	Fkbp11	-1.3836	3.98084e-11	KO_down
ENSMUSG00000003360	Ddx23	-0.394926	3.26623e-11	No_Change
ENSMUSG00000003363	Pld3	0.489354	2.47371e-16	No_Change
ENSMUSG00000003378	Grik5	0.195005	0.391277	No_Change
ENSMUSG00000003379	Cd79a	-0.000527127	0.997832	No_Change
ENSMUSG00000003380	Rabac1	0.038147	0.762094	No_Change
ENSMUSG00000003382	Etv3	1.30078	1.07164e-43	KO_up
ENSMUSG00000003402	Prkcsh	-0.140456	0.0263294	No_Change
ENSMUSG00000003410	Elavl3	-0.271379	0.261374	No_Change
ENSMUSG00000003411	Rab3b	0.836823	9.26735e-11	No_Change
ENSMUSG00000003418	St8sia6	-3.39324	8.54328e-20	KO_down
ENSMUSG00000003420	Fcgrt	0.0993232	0.706875	No_Change
ENSMUSG00000003421	Nosip	-0.0421683	0.719704	No_Change
ENSMUSG00000003423	Pih1d1	0.25533	0.10374	No_Change
ENSMUSG00000003429	Rps11	-0.420158	9.66948e-42	No_Change
ENSMUSG00000003435	Supt5	0.308092	4.75933e-13	No_Change
ENSMUSG00000003436	Dll3	-0.452435	0.306767	No_Change
ENSMUSG00000003437	Paf1	0.337156	3.18263e-05	No_Change
ENSMUSG00000003438	Timm50	0.144936	0.0906607	No_Change
ENSMUSG00000003444	Med29	-0.0555802	0.820481	No_Change
ENSMUSG00000003452	Bicd1	0.889079	0.0140614	No_Change
ENSMUSG00000003458	Ncstn	0.688059	6.83762e-13	No_Change
ENSMUSG00000003464	Pex19	0.348756	3.98526e-05	No_Change
ENSMUSG00000003469	Phyhip	-0.884189	0.00653668	No_Change
ENSMUSG00000003476	Crhr2	-5.49297	0.000225556	KO_down
ENSMUSG00000003484	Cyp4f18	-0.0334182	NA	No_Change
ENSMUSG00000003500	Impdh1	-0.849022	7.63467e-21	No_Change
ENSMUSG00000003518	Dusp3	0.817751	3.24027e-10	No_Change
ENSMUSG00000003526	Prodh	-0.370147	0.141665	No_Change
ENSMUSG00000003527	Ess2	-0.0859819	0.60515	No_Change
ENSMUSG00000003528	Slc25a1	-0.58523	5.92419e-19	No_Change
ENSMUSG00000003531	Dgcr6	-0.261152	0.109922	No_Change
ENSMUSG00000003534	Ddr1	1.02111	9.02511e-24	KO_up
ENSMUSG00000003541	Ier3	-0.221572	0.177705	No_Change
ENSMUSG00000003545	Fosb	3.21463	2.56929e-52	KO_up
ENSMUSG00000003546	Klc4	-0.0987037	0.570121	No_Change
ENSMUSG00000003549	Ercc1	-0.565797	0.00423292	No_Change
ENSMUSG00000003555	Cyp17a1	0.360333	0.063147	No_Change
ENSMUSG00000003559	As3mt	-0.00848146	0.976572	No_Change
ENSMUSG00000003573	Homer3	-0.65949	6.61075e-08	No_Change
ENSMUSG00000003575	Crtc1	0.59409	0.000319383	No_Change
ENSMUSG00000003581	Rnf215	0.4078	0.0342393	No_Change
ENSMUSG00000003585	Sec14l2	-0.321279	0.311249	No_Change
ENSMUSG00000003604	Aven	-1.05019	1.32534e-07	KO_down
ENSMUSG00000003617	Cp	0.0485416	NA	No_Change
ENSMUSG00000003623	Crot	-0.0470046	0.730034	No_Change
ENSMUSG00000003644	Rps6ka1	-0.369929	2.47013e-13	No_Change
ENSMUSG00000003657	Calb2	-0.377995	0.35824	No_Change
ENSMUSG00000003660	Snrnp200	-0.0141237	0.776463	No_Change
ENSMUSG00000003662	Ciao1	0.303785	0.0108591	No_Change
ENSMUSG00000003665	Has1	-0.0294166	NA	No_Change
ENSMUSG00000003680	Taf6l	0.172495	0.203333	No_Change
ENSMUSG00000003721	Insig2	0.0625718	0.753482	No_Change
ENSMUSG00000003731	Kpna6	0.379095	1.72532e-12	No_Change
ENSMUSG00000003746	Man1a	-0.630156	0.0514358	No_Change
ENSMUSG00000003752	Itpkc	-0.0282988	0.893194	No_Change
ENSMUSG00000003762	Coq8b	0.782855	2.22205e-10	No_Change
ENSMUSG00000003778	Brd8	-0.531603	7.10204e-16	No_Change
ENSMUSG00000003779	Kif20a	-0.403865	1.7524e-16	No_Change
ENSMUSG00000003808	Farsa	-0.112041	0.148946	No_Change
ENSMUSG00000003809	Gcdh	-0.432494	3.84703e-07	No_Change
ENSMUSG00000003810	Mast2	0.6124	3.76697e-18	No_Change
ENSMUSG00000003812	Dnase2a	0.179509	0.319682	No_Change
ENSMUSG00000003813	Rad23a	0.514194	2.24962e-10	No_Change
ENSMUSG00000003814	Calr	-0.170027	1.38636e-09	No_Change
ENSMUSG00000003824	Syce2	-0.985254	8.38993e-20	No_Change
ENSMUSG00000003847	Nfat5	0.391295	1.49535e-08	No_Change
ENSMUSG00000003848	Nob1	-0.207686	0.0260326	No_Change
ENSMUSG00000003849	Nqo1	0.542412	0.000100519	No_Change
ENSMUSG00000003863	Ppfia3	-0.707235	0.000444484	No_Change
ENSMUSG00000003865	Gys1	1.08763	4.6218e-80	KO_up
ENSMUSG00000003868	Ruvbl2	-0.968488	1.94747e-84	No_Change
ENSMUSG00000003872	Lin7b	-0.918339	0.00965332	No_Change
ENSMUSG00000003873	Bax	-0.439231	5.10095e-11	No_Change
ENSMUSG00000003923	Tfam	-0.390649	2.25755e-05	No_Change
ENSMUSG00000003929	Zfp81	0.0294672	0.894669	No_Change
ENSMUSG00000003934	Efnb3	-1.17121	0.000153242	KO_down
ENSMUSG00000003948	Mmd	1.29404	2.58001e-29	KO_up
ENSMUSG00000003949	Hlf	0.288588	0.499451	No_Change
ENSMUSG00000003955	Fam162a	0.155132	0.0683622	No_Change
ENSMUSG00000003970	Rpl8	-0.587859	3.1016e-150	No_Change
ENSMUSG00000003992	Ssbp2	-1.07522	0.00207633	KO_down
ENSMUSG00000004018	Fancl	-0.931405	9.28562e-07	No_Change
ENSMUSG00000004031	Brinp2	-0.506031	0.141784	No_Change
ENSMUSG00000004032	Gstm5	0.604673	0.0011192	No_Change
ENSMUSG00000004035	Gstm7	0.400296	0.333702	No_Change
ENSMUSG00000004038	Gstm3	-2.26439	8.48361e-13	KO_down
ENSMUSG00000004040	Stat3	-0.155382	0.00862737	No_Change
ENSMUSG00000004043	Stat5a	-0.0812937	0.795153	No_Change
ENSMUSG00000004044	Cavin1	-0.457031	0.00588278	No_Change
ENSMUSG00000004054	Map3k11	1.32372	9.07943e-27	KO_up
ENSMUSG00000004056	Akt2	0.808498	4.47805e-43	No_Change
ENSMUSG00000004069	Dnaja3	-0.0590922	0.526674	No_Change
ENSMUSG00000004070	Hmox2	0.776353	8.93722e-16	No_Change
ENSMUSG00000004071	Cdip1	0.116164	0.314217	No_Change
ENSMUSG00000004085	Map3k20	-0.980128	6.93772e-13	No_Change
ENSMUSG00000004096	Cwc15	-0.129533	0.238231	No_Change
ENSMUSG00000004098	Col5a3	0.263834	0.114028	No_Change
ENSMUSG00000004099	Dnmt1	0.600854	1.48086e-99	No_Change
ENSMUSG00000004100	Ppan	-0.43759	1.97205e-08	No_Change
ENSMUSG00000004105	Angptl2	3.14093	3.83483e-28	KO_up
ENSMUSG00000004110	Cacna1e	-0.220095	0.489754	No_Change
ENSMUSG00000004113	Cacna1b	-0.61252	0.128221	No_Change
ENSMUSG00000004127	Trmt10a	-0.266753	0.106639	No_Change
ENSMUSG00000004151	Etv1	-2.87104	0.000118991	KO_down
ENSMUSG00000004187	Kifc2	0.0246222	0.925915	No_Change
ENSMUSG00000004207	Psap	0.803997	4.07561e-221	No_Change
ENSMUSG00000004221	Ikbkg	0.321225	0.0127974	No_Change
ENSMUSG00000004231	Pax2	0.0501504	0.886117	No_Change
ENSMUSG00000004233	Wars2	1.03642	1.80645e-05	KO_up
ENSMUSG00000004263	Atn1	0.363249	9.42763e-07	No_Change
ENSMUSG00000004264	Phb2	-0.110167	0.0297372	No_Change
ENSMUSG00000004266	Ptpn6	-0.272595	0.0543261	No_Change
ENSMUSG00000004267	Eno2	-0.657421	0.000278424	No_Change
ENSMUSG00000004268	Emg1	-0.433931	2.37173e-07	No_Change
ENSMUSG00000004270	Lpcat3	0.0569238	0.586151	No_Change
ENSMUSG00000004285	Atp6v1f	0.176567	0.0818322	No_Change
ENSMUSG00000004296	Il12b	0.0353821	NA	No_Change
ENSMUSG00000004317	Clcn5	0.982224	2.69507e-37	No_Change
ENSMUSG00000004319	Clcn3	0.0753496	0.282251	No_Change
ENSMUSG00000004328	Hif3a	0.906362	3.9952e-13	No_Change
ENSMUSG00000004341	Gpx6	-4.63499	2.26378e-08	KO_down
ENSMUSG00000004344	Gpx5	-0.0810966	NA	No_Change
ENSMUSG00000004347	Pde1c	0.541408	0.192658	No_Change
ENSMUSG00000004356	Utp20	-0.20859	0.000734523	No_Change
ENSMUSG00000004359	Spic	-1.74963	8.16193e-17	KO_down
ENSMUSG00000004360	9330159F19Rik	-0.0408867	0.855097	No_Change
ENSMUSG00000004364	Cul3	0.378747	1.14732e-10	No_Change
ENSMUSG00000004366	Sst	-0.259339	0.114034	No_Change
ENSMUSG00000004371	Il11	-0.164774	NA	No_Change
ENSMUSG00000004383	Large1	-0.0329147	0.867643	No_Change
ENSMUSG00000004393	Ddx56	0.175523	0.142167	No_Change
ENSMUSG00000004394	Tmed4	0.610685	2.7384e-08	No_Change
ENSMUSG00000004415	Col26a1	0.703296	0.0442947	No_Change
ENSMUSG00000004446	Bid	-0.824062	9.81832e-13	No_Change
ENSMUSG00000004451	Ralb	0.276013	3.31883e-06	No_Change
ENSMUSG00000004455	Ppp1cc	-0.163086	0.000967193	No_Change
ENSMUSG00000004460	Dnajb11	0.0762369	0.468372	No_Change
ENSMUSG00000004462	Tbccd1	0.0643709	0.759192	No_Change
ENSMUSG00000004473	Clec11a	-0.131342	0.750835	No_Change
ENSMUSG00000004500	Zfp324	1.71335	1.90805e-06	KO_up
ENSMUSG00000004508	Gab2	3.29118	1.08512e-119	KO_up
ENSMUSG00000004530	Coro1c	0.0537068	0.329512	No_Change
ENSMUSG00000004535	Tax1bp1	0.275231	7.91226e-06	No_Change
ENSMUSG00000004540	Psg17	-0.00508225	NA	No_Change
ENSMUSG00000004558	Ndrg2	-3.07812	9.33754e-83	KO_down
ENSMUSG00000004561	Mettl17	-0.493987	0.0262283	No_Change
ENSMUSG00000004562	Arhgef40	-2.54768	5.64582e-20	KO_down
ENSMUSG00000004565	Pnpla6	0.210679	0.001931	No_Change
ENSMUSG00000004567	Mcoln1	-0.0702104	0.494651	No_Change
ENSMUSG00000004568	Arhgef18	-0.157525	0.011462	No_Change
ENSMUSG00000004591	Pkn2	0.378458	7.8139e-11	No_Change
ENSMUSG00000004609	Cd33	0.0353821	NA	No_Change
ENSMUSG00000004610	Etfb	-0.439176	4.35527e-09	No_Change
ENSMUSG00000004612	Nkg7	-0.66966	0.153941	No_Change
ENSMUSG00000004626	Stxbp2	0.778418	2.47169e-37	No_Change
ENSMUSG00000004630	Pcp2	0.289547	0.109146	No_Change
ENSMUSG00000004631	Sgce	1.52045	2.25033e-07	KO_up
ENSMUSG00000004633	Chn2	-0.708394	0.0506866	No_Change
ENSMUSG00000004637	Wwox	0.877259	2.61267e-11	No_Change
ENSMUSG00000004642	Slbp	-0.119915	0.149366	No_Change
ENSMUSG00000004654	Ghrhr	0.176923	NA	No_Change
ENSMUSG00000004655	Aqp1	0.0713896	0.768382	No_Change
ENSMUSG00000004661	Arid3b	0.233348	0.00121681	No_Change
ENSMUSG00000004665	Cnn2	0.0406281	0.733537	No_Change
ENSMUSG00000004667	Polr2e	-0.783972	8.44931e-59	No_Change
ENSMUSG00000004668	Abca13	-0.867164	0.0879416	No_Change
ENSMUSG00000004677	Myo9b	0.749712	4.17809e-38	No_Change
ENSMUSG00000004698	Hdac9	0.930314	0.012729	No_Change
ENSMUSG00000004707	Ly9	0.176085	NA	No_Change
ENSMUSG00000004748	Mtfp1	-0.317817	0.325605	No_Change
ENSMUSG00000004768	Rab23	-0.891413	1.26979e-12	No_Change
ENSMUSG00000004771	Rab11a	0.464392	1.40003e-08	No_Change
ENSMUSG00000004788	Eif2b2	-0.106634	0.437232	No_Change
ENSMUSG00000004789	Dlst	0.0845331	0.229512	No_Change
ENSMUSG00000004791	Pgf	0.576497	0.170083	No_Change
ENSMUSG00000004798	Ulk2	1.41796	9.82581e-22	KO_up
ENSMUSG00000004815	Dgkq	-0.205078	0.235978	No_Change
ENSMUSG00000004837	Grap	0.474955	0.0404739	No_Change
ENSMUSG00000004843	Chmp2b	0.664748	5.30004e-09	No_Change
ENSMUSG00000004846	Plod3	0.0517375	0.661627	No_Change
ENSMUSG00000004849	Ap1s1	0.0627147	0.573527	No_Change
ENSMUSG00000004864	Mapk13	1.3182	2.27541e-32	KO_up
ENSMUSG00000004865	Srpk1	0.0581033	0.380719	No_Change
ENSMUSG00000004872	Pax3	-0.0477625	NA	No_Change
ENSMUSG00000004880	Lbr	-0.368951	3.5502e-12	No_Change
ENSMUSG00000004885	Crabp2	0.711001	0.000259471	No_Change
ENSMUSG00000004891	Nes	0.0146192	0.920887	No_Change
ENSMUSG00000004892	Bcan	-3.19945	5.15055e-06	KO_down
ENSMUSG00000004895	Prcc	0.0544239	0.575447	No_Change
ENSMUSG00000004896	Rrnad1	0.121037	0.688015	No_Change
ENSMUSG00000004897	Hdgf	-0.240129	5.61127e-09	No_Change
ENSMUSG00000004902	Slc25a18	0.374198	0.0656033	No_Change
ENSMUSG00000004929	Thop1	-0.492173	1.0186e-13	No_Change
ENSMUSG00000004931	Apba3	0.180265	0.151287	No_Change
ENSMUSG00000004933	Matk	-0.412027	0.33233	No_Change
ENSMUSG00000004934	Pias4	-0.163506	0.0383118	No_Change
ENSMUSG00000004936	Map2k1	-0.360463	4.17848e-11	No_Change
ENSMUSG00000004937	Sgta	0.0970214	0.143005	No_Change
ENSMUSG00000004939	Nmrk2	-0.122244	NA	No_Change
ENSMUSG00000004945	Tmem242	-0.0556271	0.767232	No_Change
ENSMUSG00000004947	Dtx2	0.595436	4.94775e-12	No_Change
ENSMUSG00000004948	Zp3	-1.57452	0.00376359	KO_down
ENSMUSG00000004951	Hspb1	0.327283	2.37745e-13	No_Change
ENSMUSG00000004952	Rasa4	-1.80034	3.29639e-23	KO_down
ENSMUSG00000004961	Syt5	-0.570014	0.136486	No_Change
ENSMUSG00000004980	Hnrnpa2b1	-0.378355	8.5108e-40	No_Change
ENSMUSG00000004988	Fxyd4	-0.165555	0.691873	No_Change
ENSMUSG00000004994	Ccdc130	0.348884	0.0751942	No_Change
ENSMUSG00000004996	Mri1	-0.772406	2.20849e-06	No_Change
ENSMUSG00000005034	Prkacb	-0.0644889	0.588164	No_Change
ENSMUSG00000005043	Sgsh	1.09567	1.78425e-05	KO_up
ENSMUSG00000005045	Chd5	-0.280382	0.245529	No_Change
ENSMUSG00000005054	Cstb	0.325272	7.83438e-06	No_Change
ENSMUSG00000005057	Sh2b2	-0.845605	0.0180188	No_Change
ENSMUSG00000005069	Pex5	0.174759	0.050983	No_Change
ENSMUSG00000005078	Jkamp	0.395685	0.000350657	No_Change
ENSMUSG00000005087	Cd44	-0.178702	0.694583	No_Change
ENSMUSG00000005089	Slc1a2	-0.108244	0.710894	No_Change
ENSMUSG00000005102	Eif2ak4	0.38612	0.000186936	No_Change
ENSMUSG00000005103	Wdr1	1.00367	3.60433e-63	KO_up
ENSMUSG00000005107	Slc2a9	-0.471787	0.137	No_Change
ENSMUSG00000005124	Ccn4	-0.0477625	NA	No_Change
ENSMUSG00000005125	Ndrg1	1.85755	0	KO_up
ENSMUSG00000005131	4930550C14Rik	0.0352566	0.930238	No_Change
ENSMUSG00000005142	Man2b1	-0.357355	3.26871e-06	No_Change
ENSMUSG00000005148	Klf5	-1.46717	9.82264e-71	KO_down
ENSMUSG00000005150	Wdr83	-0.0795227	0.78119	No_Change
ENSMUSG00000005161	Prdx2	-0.601175	3.46796e-26	No_Change
ENSMUSG00000005198	Polr2a	-0.32664	2.4299e-16	No_Change
ENSMUSG00000005204	Senp3	0.0941833	0.0590484	No_Change
ENSMUSG00000005220	Corin	0.0966613	0.691849	No_Change
ENSMUSG00000005225	Plekha8	-0.240812	0.00553129	No_Change
ENSMUSG00000005232	G6pc2	-0.117246	NA	No_Change
ENSMUSG00000005233	Spc25	-0.566063	3.2385e-10	No_Change
ENSMUSG00000005237	Dnah2	-0.186888	0.560966	No_Change
ENSMUSG00000005251	Ripk4	0.610444	4.60651e-07	No_Change
ENSMUSG00000005262	Ufd1	-0.197431	0.0817511	No_Change
ENSMUSG00000005267	Zfp287	0.0985356	0.837784	No_Change
ENSMUSG00000005268	Prlr	3.10617	3.65182e-29	KO_up
ENSMUSG00000005299	Letm1	0.140562	0.150065	No_Change
ENSMUSG00000005312	Ubqln1	0.39907	1.06782e-22	No_Change
ENSMUSG00000005320	Fgfr4	-1.04233	0.000340297	KO_down
ENSMUSG00000005338	Cadm3	-0.0502017	0.831511	No_Change
ENSMUSG00000005354	Txn2	-0.446499	4.53623e-09	No_Change
ENSMUSG00000005355	Casp14	-0.369321	0.373327	No_Change
ENSMUSG00000005357	Slc1a6	-0.380181	0.385908	No_Change
ENSMUSG00000005360	Slc1a3	0.0532564	0.871646	No_Change
ENSMUSG00000005362	Crbn	-0.0994513	0.482911	No_Change
ENSMUSG00000005370	Msh6	-1.33859	0	KO_down
ENSMUSG00000005371	Fbxo11	0.46217	3.95106e-08	No_Change
ENSMUSG00000005373	Mlxipl	0.582766	2.90432e-06	No_Change
ENSMUSG00000005374	Tbl2	-0.273738	0.000186655	No_Change
ENSMUSG00000005378	Bud23	-0.1662	0.132763	No_Change
ENSMUSG00000005397	Nid1	-0.36778	3.68334e-19	No_Change
ENSMUSG00000005410	Mcm5	-0.887218	1.54301e-98	No_Change
ENSMUSG00000005413	Hmox1	1.53175	2.55979e-188	KO_up
ENSMUSG00000005417	Mprip	1.11828	1.53122e-134	KO_up
ENSMUSG00000005442	Cic	0.163368	0.00173142	No_Change
ENSMUSG00000005447	Pafah1b3	0.108316	0.435145	No_Change
ENSMUSG00000005465	Il27ra	-1.77826	0.0172235	KO_down
ENSMUSG00000005469	Prkaca	0.101229	0.152676	No_Change
ENSMUSG00000005470	Asf1b	-0.204095	0.0815262	No_Change
ENSMUSG00000005474	Myl10	0.957217	0.0704326	No_Change
ENSMUSG00000005481	Ddx39a	-0.532752	7.78262e-17	No_Change
ENSMUSG00000005483	Dnajb1	0.422652	8.76784e-06	No_Change
ENSMUSG00000005493	Msh4	-1.23599	0.0484441	KO_down
ENSMUSG00000005501	Usp40	0.0566898	0.793183	No_Change
ENSMUSG00000005505	Kbtbd4	0.429583	0.017097	No_Change
ENSMUSG00000005506	Celf1	-0.0653527	0.148789	No_Change
ENSMUSG00000005510	Ndufs3	-0.179987	0.138117	No_Change
ENSMUSG00000005514	Por	0.151941	0.0465389	No_Change
ENSMUSG00000005533	Igf1r	-0.225366	0.229861	No_Change
ENSMUSG00000005534	Insr	0.351109	0.00712911	No_Change
ENSMUSG00000005547	Cyp2a5	-0.0419627	NA	No_Change
ENSMUSG00000005553	Atp4a	1.09391	0.0180206	KO_up
ENSMUSG00000005566	Trim28	-1.40687	0	KO_down
ENSMUSG00000005575	Ube2m	-0.0525834	0.62728	No_Change
ENSMUSG00000005580	Adcy9	0.704432	0.00278955	No_Change
ENSMUSG00000005583	Mef2c	0.170247	NA	No_Change
ENSMUSG00000005609	Ctr9	0.599488	1.56423e-23	No_Change
ENSMUSG00000005610	Eif4g2	0.148347	1.0093e-07	No_Change
ENSMUSG00000005611	Irag1	-0.4202	0.0871949	No_Change
ENSMUSG00000005615	Pcyt1a	0.957547	5.42268e-21	No_Change
ENSMUSG00000005621	Zfp592	0.935745	1.88099e-31	No_Change
ENSMUSG00000005625	Psmd4	-0.174454	0.00124813	No_Change
ENSMUSG00000005628	Tmod4	-0.0263561	0.955974	No_Change
ENSMUSG00000005640	Insrr	0.495101	0.155664	No_Change
ENSMUSG00000005649	Cabp5	0.16154	0.43627	No_Change
ENSMUSG00000005656	Snx6	0.0270237	0.799496	No_Change
ENSMUSG00000005667	Mthfd2	-0.601093	3.31272e-14	No_Change
ENSMUSG00000005672	Kit	-1.97405	1.22412e-265	KO_down
ENSMUSG00000005674	Tomm40l	-0.179527	0.381891	No_Change
ENSMUSG00000005677	Nr1i3	-0.315611	0.319951	No_Change
ENSMUSG00000005681	Apoa2	0.0795202	0.81794	No_Change
ENSMUSG00000005682	Pan2	0.184347	0.00952129	No_Change
ENSMUSG00000005683	Cs	0.289739	6.82455e-16	No_Change
ENSMUSG00000005686	Ampd3	1.54439	3.32925e-20	KO_up
ENSMUSG00000005687	Bcas2	-0.567927	4.68651e-15	No_Change
ENSMUSG00000005696	Sh2d1a	-0.047308	NA	No_Change
ENSMUSG00000005698	Ctcf	-0.339319	1.74072e-07	No_Change
ENSMUSG00000005699	Pard6a	0.711509	0.00142465	No_Change
ENSMUSG00000005705	Agrp	0.626366	0.181346	No_Change
ENSMUSG00000005716	Pvalb	-0.116613	0.596156	No_Change
ENSMUSG00000005718	Tfap4	-0.0162558	0.950037	No_Change
ENSMUSG00000005732	Ranbp1	-0.390723	1.10037e-13	No_Change
ENSMUSG00000005763	Cd247	0.0356469	NA	No_Change
ENSMUSG00000005774	Rfx5	0.0715403	0.710824	No_Change
ENSMUSG00000005779	Psmb4	-0.261362	3.39756e-05	No_Change
ENSMUSG00000005802	Slc30a4	1.77701	3.28035e-22	KO_up
ENSMUSG00000005803	Sqor	-0.0810966	NA	No_Change
ENSMUSG00000005804	Bloc1s6	0.437875	0.00437712	No_Change
ENSMUSG00000005813	Metap1	0.00751961	0.952162	No_Change
ENSMUSG00000005823	Gpr108	0.623365	2.08891e-07	No_Change
ENSMUSG00000005824	Tnfsf14	0.0431387	NA	No_Change
ENSMUSG00000005836	Gata6	-0.487684	0.0104696	No_Change
ENSMUSG00000005846	Rsl1d1	-0.625206	1.39289e-32	No_Change
ENSMUSG00000005871	Apc	0.432091	8.70169e-18	No_Change
ENSMUSG00000005873	Reep5	0.619884	7.67888e-14	No_Change
ENSMUSG00000005881	Ergic3	0.145826	0.0628321	No_Change
ENSMUSG00000005882	Uqcc1	0.446499	0.000282939	No_Change
ENSMUSG00000005883	Spo11	0.188921	0.377963	No_Change
ENSMUSG00000005886	Ncoa2	0.784805	2.42666e-22	No_Change
ENSMUSG00000005892	Trh	-1.97089	1.85206e-09	KO_down
ENSMUSG00000005893	Nr2c2	0.436204	0.000270115	No_Change
ENSMUSG00000005897	Nr2c1	0.715035	0.00277962	No_Change
ENSMUSG00000005899	Smpd4	-0.594318	3.30522e-16	No_Change
ENSMUSG00000005907	Pex1	0.147691	0.254004	No_Change
ENSMUSG00000005917	Otx1	-0.376764	0.324191	No_Change
ENSMUSG00000005936	Kctd20	0.0285781	0.727947	No_Change
ENSMUSG00000005947	Itgae	-2.21881	2.8587e-05	KO_down
ENSMUSG00000005949	Ctns	0.128513	0.389938	No_Change
ENSMUSG00000005950	P2rx5	-0.804339	0.0875848	No_Change
ENSMUSG00000005951	Shpk	-0.30546	0.367816	No_Change
ENSMUSG00000005952	Trpv1	-0.505214	0.205263	No_Change
ENSMUSG00000005958	Ephb3	-1.44352	3.95372e-36	KO_down
ENSMUSG00000005968	Tuft1	-0.261513	0.207461	No_Change
ENSMUSG00000005973	Rcn1	-0.317617	0.000307562	No_Change
ENSMUSG00000005980	Dnase1	-0.0413687	NA	No_Change
ENSMUSG00000005981	Trap1	-0.233786	7.06242e-05	No_Change
ENSMUSG00000005982	Naa60	-0.101882	0.550988	No_Change
ENSMUSG00000005983	1700037C18Rik	0.0823407	0.866696	No_Change
ENSMUSG00000005986	Ankrd13d	-0.512969	0.0493287	No_Change
ENSMUSG00000005994	Tyrp1	-0.0413687	NA	No_Change
ENSMUSG00000006005	Tpr	0.361152	4.11754e-24	No_Change
ENSMUSG00000006010	Odr4	0.462542	0.000303558	No_Change
ENSMUSG00000006014	Prg4	0.266653	0.267964	No_Change
ENSMUSG00000006019	Dhx34	0.236106	0.180231	No_Change
ENSMUSG00000006021	Kptn	0.0528135	0.856926	No_Change
ENSMUSG00000006024	Napa	0.245967	0.00808494	No_Change
ENSMUSG00000006050	Sra1	0.0905375	0.481178	No_Change
ENSMUSG00000006056	Calcoco2	-0.665074	1.29395e-28	No_Change
ENSMUSG00000006057	Atp5g1	-0.707482	1.6355e-28	No_Change
ENSMUSG00000006058	Snf8	0.252106	0.0132335	No_Change
ENSMUSG00000006095	Tbcb	0.188157	0.073942	No_Change
ENSMUSG00000006127	Inpp5k	0.268683	0.0412488	No_Change
ENSMUSG00000006134	Crkl	0.133436	0.145825	No_Change
ENSMUSG00000006143	Upk3bl	-0.293431	0.328099	No_Change
ENSMUSG00000006154	Eps8l1	0.486877	0.25707	No_Change
ENSMUSG00000006169	Clint1	0.355261	5.28907e-09	No_Change
ENSMUSG00000006179	Prss16	-0.78503	0.00576777	No_Change
ENSMUSG00000006191	Cdkal1	0.0631264	0.703794	No_Change
ENSMUSG00000006200	Rhox6	3.13803	0	KO_up
ENSMUSG00000006204	Cdcp3	-0.0419627	NA	No_Change
ENSMUSG00000006205	Htra1	-1.3667	4.244e-52	KO_down
ENSMUSG00000006215	Zbtb17	0.266429	0.0104058	No_Change
ENSMUSG00000006216	Clcnkb	-3.31647	1.51847e-08	KO_down
ENSMUSG00000006218	Fam131c	-2.71239	1.85063e-23	KO_down
ENSMUSG00000006219	Fblim1	-1.8243	7.27363e-119	KO_down
ENSMUSG00000006221	Hspb7	0.0329673	0.951993	No_Change
ENSMUSG00000006235	Epor	-1.1813	0.0267955	KO_down
ENSMUSG00000006241	Ccdc159	1.83019	3.03041e-05	KO_up
ENSMUSG00000006262	Mob1b	0.748222	4.2753e-10	No_Change
ENSMUSG00000006269	Atp6v1b1	0.0352895	NA	No_Change
ENSMUSG00000006270	Vax1	0.262744	0.270701	No_Change
ENSMUSG00000006273	Atp6v1b2	0.356215	1.1868e-13	No_Change
ENSMUSG00000006276	Eps15l1	-0.0818283	0.364587	No_Change
ENSMUSG00000006281	Tep1	0.447445	9.14714e-05	No_Change
ENSMUSG00000006288	Ttc5	-0.387794	0.00141944	No_Change
ENSMUSG00000006289	Osgep	-0.726568	3.45162e-10	No_Change
ENSMUSG00000006299	Aamp	-0.00240115	0.982924	No_Change
ENSMUSG00000006301	Tmbim1	-0.216541	0.127483	No_Change
ENSMUSG00000006304	Arpc2	0.707289	1.2244e-53	No_Change
ENSMUSG00000006307	Kmt2b	0.266727	1.9074e-06	No_Change
ENSMUSG00000006310	Zbtb32	-0.601207	0.0202527	No_Change
ENSMUSG00000006311	Etv2	-0.287776	0.450783	No_Change
ENSMUSG00000006313	Upk1a	-0.194632	0.668571	No_Change
ENSMUSG00000006315	Tmem147	0.502074	5.7181e-05	No_Change
ENSMUSG00000006333	Rps9	-0.397222	1.33142e-54	No_Change
ENSMUSG00000006335	Tfpt	0.265134	0.183093	No_Change
ENSMUSG00000006342	Susd2	-2.09818	2.93888e-51	KO_down
ENSMUSG00000006344	Ggt5	3.13194	0.00498989	KO_up
ENSMUSG00000006345	Ggt1	0.416485	0.0221553	No_Change
ENSMUSG00000006356	Crip2	-0.619354	7.17113e-10	No_Change
ENSMUSG00000006360	Crip1	-0.15683	0.372044	No_Change
ENSMUSG00000006362	Cbfa2t3	1.9702	0.00498655	KO_up
ENSMUSG00000006369	Fbln1	-0.9315	4.49127e-34	No_Change
ENSMUSG00000006373	Pgrmc1	0.651447	2.22569e-15	No_Change
ENSMUSG00000006378	Gcat	-1.09856	6.31827e-20	KO_down
ENSMUSG00000006386	Tek	-4.34485	1.80437e-76	KO_down
ENSMUSG00000006390	Elovl1	0.830618	1.73259e-09	No_Change
ENSMUSG00000006392	Med8	0.182897	0.18254	No_Change
ENSMUSG00000006395	Hyi	0.67329	0.0455083	No_Change
ENSMUSG00000006398	Cdc20	-0.794605	3.31474e-31	No_Change
ENSMUSG00000006403	Adamts4	-0.379835	0.384143	No_Change
ENSMUSG00000006411	Nectin4	-4.0049	3.04155e-08	KO_down
ENSMUSG00000006412	Pfdn2	-0.556736	5.67155e-13	No_Change
ENSMUSG00000006418	Rnf114	0.131526	0.0999976	No_Change
ENSMUSG00000006423	Steep1	0.0705952	0.721465	No_Change
ENSMUSG00000006435	Neurl1a	0.126349	0.321926	No_Change
ENSMUSG00000006442	Srm	-1.32112	4.23947e-71	KO_down
ENSMUSG00000006445	Epha2	-3.62902	7.62438e-154	KO_down
ENSMUSG00000006456	Rbm14	-0.294751	0.00139104	No_Change
ENSMUSG00000006457	Actn3	-1.92521	3.01578e-05	KO_down
ENSMUSG00000006462	A530013C23Rik	0.0431797	NA	No_Change
ENSMUSG00000006463	Zdhhc24	0.110387	0.564923	No_Change
ENSMUSG00000006464	Bbs1	0.13984	0.653322	No_Change
ENSMUSG00000006469	Slc34a3	-2.65164	0.00329903	KO_down
ENSMUSG00000006471	Ndor1	0.213689	0.0749064	No_Change
ENSMUSG00000006476	Nsmf	1.17326	1.07391e-13	KO_up
ENSMUSG00000006488	Prl7a1	-0.0109629	NA	No_Change
ENSMUSG00000006494	Pdk1	-0.150558	0.0824227	No_Change
ENSMUSG00000006498	Ptbp1	-0.267916	8.68052e-18	No_Change
ENSMUSG00000006517	Mvd	-0.377791	0.00125191	No_Change
ENSMUSG00000006519	Cyba	-0.100545	0.611784	No_Change
ENSMUSG00000006522	Itih3	0.0250528	0.939263	No_Change
ENSMUSG00000006526	Stimate	-0.0155448	0.935924	No_Change
ENSMUSG00000006527	Sfmbt1	0.217628	0.219859	No_Change
ENSMUSG00000006529	Itih1	-0.0419627	NA	No_Change
ENSMUSG00000006538	Ihh	0.0696372	NA	No_Change
ENSMUSG00000006542	Prkag3	0.0129199	NA	No_Change
ENSMUSG00000006546	Cryba2	-0.0362336	NA	No_Change
ENSMUSG00000006567	Atp7b	-0.264608	0.270414	No_Change
ENSMUSG00000006574	Slc4a1	-0.292653	0.213088	No_Change
ENSMUSG00000006575	Rundc3a	-0.662657	5.06428e-05	No_Change
ENSMUSG00000006576	Slc4a3	1.0894	0.000154453	KO_up
ENSMUSG00000006585	Cdt1	-0.508998	1.48295e-19	No_Change
ENSMUSG00000006586	Runx1t1	-1.25792	0.0267358	KO_down
ENSMUSG00000006587	Snai3	0.00997481	0.987499	No_Change
ENSMUSG00000006589	Aprt	-0.374809	3.07112e-08	No_Change
ENSMUSG00000006599	Gtf2h1	-0.276255	0.00012231	No_Change
ENSMUSG00000006611	Hfe	-0.362968	0.35342	No_Change
ENSMUSG00000006638	Abhd1	0.356199	0.158462	No_Change
ENSMUSG00000006641	Slc5a6	1.34613	2.2106e-30	KO_up
ENSMUSG00000006642	Tcf23	-0.169044	0.471122	No_Change
ENSMUSG00000006649	Nphs1	-7.81318	8.42664e-08	KO_down
ENSMUSG00000006651	Aplp1	-1.93303	3.98509e-50	KO_down
ENSMUSG00000006673	Qrich1	-0.0648754	0.402684	No_Change
ENSMUSG00000006675	P4htm	0.135888	0.658751	No_Change
ENSMUSG00000006676	Usp19	0.389262	1.54687e-12	No_Change
ENSMUSG00000006678	Pola1	-0.770347	1.2812e-22	No_Change
ENSMUSG00000006699	Cdc42	0.157715	0.000428432	No_Change
ENSMUSG00000006705	Pknox1	0.701536	8.2064e-11	No_Change
ENSMUSG00000006711	D130043K22Rik	0.0468293	0.886458	No_Change
ENSMUSG00000006715	Gmnn	-0.475871	3.92912e-08	No_Change
ENSMUSG00000006717	Acot13	0.0543385	0.755512	No_Change
ENSMUSG00000006720	Zfp184	-1.11809	5.71137e-10	KO_down
ENSMUSG00000006724	Cyp27b1	0.216787	0.549859	No_Change
ENSMUSG00000006728	Cdk4	-0.608104	1.55009e-38	No_Change
ENSMUSG00000006731	B4galnt1	-0.480684	0.0492375	No_Change
ENSMUSG00000006732	Mettl1	-0.288341	0.102712	No_Change
ENSMUSG00000006736	Tspan31	0.0946609	0.386995	No_Change
ENSMUSG00000006740	Kif5b	-0.121469	0.0316178	No_Change
ENSMUSG00000006763	Saal1	-0.524059	1.82492e-05	No_Change
ENSMUSG00000006764	Tph2	0.0194743	0.97189	No_Change
ENSMUSG00000006777	Krt23	-0.0524274	0.878315	No_Change
ENSMUSG00000006782	Cnp	-0.0808929	0.720877	No_Change
ENSMUSG00000006784	Odad4	-0.2624	0.376059	No_Change
ENSMUSG00000006800	Sulf2	-0.339383	1.20102e-09	No_Change
ENSMUSG00000006818	Sod2	-0.530412	4.83613e-19	No_Change
ENSMUSG00000006850	Tmco6	-0.38641	0.0409134	No_Change
ENSMUSG00000006906	Stambp	1.41414	4.56157e-11	KO_up
ENSMUSG00000006920	Ezh1	0.190686	0.0361284	No_Change
ENSMUSG00000006930	Hap1	-0.325575	0.0034223	No_Change
ENSMUSG00000006931	P3h4	0.426509	0.185425	No_Change
ENSMUSG00000006932	Ctnnb1	0.252417	4.90704e-21	No_Change
ENSMUSG00000006941	Eif1b	0.14514	0.327915	No_Change
ENSMUSG00000006958	Chrd	-0.708666	0.0455353	No_Change
ENSMUSG00000006998	Psmd2	-0.0680517	0.0686325	No_Change
ENSMUSG00000007021	Syngr3	-0.914841	0.000412554	No_Change
ENSMUSG00000007029	Vars	-0.808323	3.60214e-84	No_Change
ENSMUSG00000007030	Vwa7	0.18851	0.657384	No_Change
ENSMUSG00000007033	Hspa1l	0.145138	NA	No_Change
ENSMUSG00000007034	Slc44a4	0.715747	0.0350821	No_Change
ENSMUSG00000007035	Msh5	-0.381964	0.264272	No_Change
ENSMUSG00000007036	Abhd16a	0.181922	0.310212	No_Change
ENSMUSG00000007038	Neu1	0.413187	3.73709e-07	No_Change
ENSMUSG00000007039	Ddah2	-1.18883	5.43237e-56	KO_down
ENSMUSG00000007041	Clic1	0.432442	5.76876e-08	No_Change
ENSMUSG00000007044	NA	-0.287665	0.213252	No_Change
ENSMUSG00000007050	Lsm2	-0.434562	1.84899e-05	No_Change
ENSMUSG00000007080	Pole	-0.610693	4.85641e-16	No_Change
ENSMUSG00000007097	Atp1a2	1.59323	2.35013e-16	KO_up
ENSMUSG00000007107	Atp1a4	1.91632	0.0325902	KO_up
ENSMUSG00000007122	Casq1	0.0896621	0.730034	No_Change
ENSMUSG00000007207	Stx1a	0.569439	0.00417336	No_Change
ENSMUSG00000007209	Ceacam9	-0.00489341	NA	No_Change
ENSMUSG00000007216	Zfp775	0.324824	0.12048	No_Change
ENSMUSG00000007279	Scube2	0.525364	0.214941	No_Change
ENSMUSG00000007338	Mrpl49	-0.297517	0.0041207	No_Change
ENSMUSG00000007379	Dennd2c	-1.72077	1.78933e-81	KO_down
ENSMUSG00000007411	Mark3	0.421142	6.25926e-11	No_Change
ENSMUSG00000007415	Gatad1	0.0551834	0.598838	No_Change
ENSMUSG00000007440	Pcdha10	-0.550678	0.1577	No_Change
ENSMUSG00000007458	M6pr	0.231846	1.29384e-05	No_Change
ENSMUSG00000007476	Lrrc8a	0.413416	0.000421804	No_Change
ENSMUSG00000007564	Ppp2r1a	-0.0423061	0.489754	No_Change
ENSMUSG00000007570	Fance	0.0883287	0.474414	No_Change
ENSMUSG00000007589	Tinf2	0.0166499	0.913708	No_Change
ENSMUSG00000007591	Tssk4	0.0431387	NA	No_Change
ENSMUSG00000007594	Hapln4	0.337806	0.329749	No_Change
ENSMUSG00000007603	Dus3l	-0.58369	4.61869e-08	No_Change
ENSMUSG00000007610	Gtpbp3	-0.282448	0.0155898	No_Change
ENSMUSG00000007613	Tgfbr1	0.346778	0.0046536	No_Change
ENSMUSG00000007617	Homer1	0.084431	0.510077	No_Change
ENSMUSG00000007646	Rad51c	-0.733622	1.28217e-07	No_Change
ENSMUSG00000007653	Gabrb2	-0.047308	NA	No_Change
ENSMUSG00000007655	Cav1	-0.0368919	NA	No_Change
ENSMUSG00000007656	Arpp19	-0.277892	0.000970194	No_Change
ENSMUSG00000007659	Bcl2l1	0.661275	8.99471e-12	No_Change
ENSMUSG00000007670	Khsrp	-0.162986	0.000599408	No_Change
ENSMUSG00000007682	Dio2	0.0147881	NA	No_Change
ENSMUSG00000007721	Ccdc124	-0.657718	2.34115e-15	No_Change
ENSMUSG00000007739	Cct4	-0.184435	2.41724e-08	No_Change
ENSMUSG00000007777	0610009B22Rik	0.0145112	0.962629	No_Change
ENSMUSG00000007783	Cpt1c	-0.566279	7.03292e-10	No_Change
ENSMUSG00000007812	Zfp655	-0.100873	0.28921	No_Change
ENSMUSG00000007815	Rhoa	-0.114575	0.00225948	No_Change
ENSMUSG00000007817	Zmiz1	1.61972	3.95663e-106	KO_up
ENSMUSG00000007827	Ankrd26	0.205697	0.1133	No_Change
ENSMUSG00000007833	Aldh16a1	0.159122	0.0935247	No_Change
ENSMUSG00000007836	Hnrnpa0	-0.0451274	0.464189	No_Change
ENSMUSG00000007837	Prrg2	0.698549	0.00652477	No_Change
ENSMUSG00000007850	Hnrnph1	0.142222	0.00174319	No_Change
ENSMUSG00000007867	Ift43	1.2172	1.12678e-15	KO_up
ENSMUSG00000007872	Id3	2.34394	2.73876e-09	KO_up
ENSMUSG00000007877	Tcap	0.0855285	NA	No_Change
ENSMUSG00000007880	Arid1a	0.682568	1.01403e-52	No_Change
ENSMUSG00000007888	Crlf1	0.479215	0.283929	No_Change
ENSMUSG00000007891	Ctsd	-0.193524	2.6615e-08	No_Change
ENSMUSG00000007892	Rplp1	-0.433983	8.70311e-64	No_Change
ENSMUSG00000007908	Hmgcll1	-0.115139	0.793662	No_Change
ENSMUSG00000007944	Ttc9b	-0.61525	0.172704	No_Change
ENSMUSG00000007946	Phox2a	-1.23789	0.00144729	KO_down
ENSMUSG00000007950	Abhd8	-0.688749	0.000687552	No_Change
ENSMUSG00000007987	Ift22	0.460118	0.0739177	No_Change
ENSMUSG00000007989	Fzd3	-0.154342	0.700442	No_Change
ENSMUSG00000008028	1700008O03Rik	-0.00797569	0.985608	No_Change
ENSMUSG00000008035	Mid1ip1	-1.40045	4.59249e-15	KO_down
ENSMUSG00000008036	Ap2s1	0.115972	0.227891	No_Change
ENSMUSG00000008090	Fgfrl1	-0.668524	0.00265931	No_Change
ENSMUSG00000008129	Brme1	0.334273	0.405819	No_Change
ENSMUSG00000008136	Fhl2	0.628412	0.0320466	No_Change
ENSMUSG00000008140	Emc10	-0.135288	0.17443	No_Change
ENSMUSG00000008153	Clstn3	0.2763	0.184474	No_Change
ENSMUSG00000008167	Fbxw9	0.337105	0.00303364	No_Change
ENSMUSG00000008193	Spib	0.396046	0.275709	No_Change
ENSMUSG00000008200	Fnbp4	-0.0169768	0.828875	No_Change
ENSMUSG00000008206	Cers4	-1.32971	9.62541e-28	KO_down
ENSMUSG00000008226	Scrn3	-0.0301154	0.838722	No_Change
ENSMUSG00000008301	Phax	0.18848	0.136814	No_Change
ENSMUSG00000008305	Tle1	-0.688804	2.37745e-13	No_Change
ENSMUSG00000008307	1700109H08Rik	0.160207	0.716871	No_Change
ENSMUSG00000008318	Relt	-0.455318	0.0354174	No_Change
ENSMUSG00000008333	Snrpb2	-0.301709	0.000342589	No_Change
ENSMUSG00000008348	Ubc	-0.495226	1.31995e-36	No_Change
ENSMUSG00000008373	Prpf31	0.067391	0.539255	No_Change
ENSMUSG00000008384	Sertad1	0.871303	4.51106e-06	No_Change
ENSMUSG00000008393	Carhsp1	0.603119	1.25802e-15	No_Change
ENSMUSG00000008398	Elk3	-0.00146665	0.996374	No_Change
ENSMUSG00000008429	Herpud2	0.358804	0.00280183	No_Change
ENSMUSG00000008435	Rdh13	0.039911	0.788845	No_Change
ENSMUSG00000008438	Adam21	0.0135996	NA	No_Change
ENSMUSG00000008450	Nutf2	-0.34921	4.90568e-07	No_Change
ENSMUSG00000008461	Fut1	0.217144	0.406814	No_Change
ENSMUSG00000008475	Arpc5	0.789169	6.09779e-24	No_Change
ENSMUSG00000008482	Rnf151	0.0147881	NA	No_Change
ENSMUSG00000008489	Elavl2	-1.80992	1.28035e-24	KO_down
ENSMUSG00000008496	Pou2f2	-0.0393287	0.93658	No_Change
ENSMUSG00000008540	Mgst1	0.329386	0.316803	No_Change
ENSMUSG00000008575	Nfib	-0.624016	0.00567688	No_Change
ENSMUSG00000008601	Rab25	-2.18513	0.00158882	KO_down
ENSMUSG00000008604	Ubqln4	-1.34065	1.07742e-94	KO_down
ENSMUSG00000008658	Rbfox1	0.299391	0.37121	No_Change
ENSMUSG00000008668	Rps18	-0.531866	1.12731e-87	No_Change
ENSMUSG00000008682	Rpl10	-0.283809	1.6935e-21	No_Change
ENSMUSG00000008683	Rps15a	-0.322117	8.99924e-18	No_Change
ENSMUSG00000008686	NA	-0.247906	0.279385	No_Change
ENSMUSG00000008690	Ncaph2	-0.131009	0.0233936	No_Change
ENSMUSG00000008730	Hipk1	0.331156	2.65461e-05	No_Change
ENSMUSG00000008734	Gprc5b	0.105733	0.437978	No_Change
ENSMUSG00000008763	Man1a2	0.748065	1.46643e-20	No_Change
ENSMUSG00000008813	Tppp2	-0.0477625	NA	No_Change
ENSMUSG00000008822	Acyp1	-0.362233	0.0989176	No_Change
ENSMUSG00000008855	Hdac5	0.335028	1.62588e-06	No_Change
ENSMUSG00000008859	Rala	0.22307	0.0111385	No_Change
ENSMUSG00000008892	Vdac3	0.189625	0.0169505	No_Change
ENSMUSG00000008932	Slc1a7	-0.0495644	NA	No_Change
ENSMUSG00000008958	Vps72	-0.231169	0.0122748	No_Change
ENSMUSG00000008976	Gabpa	-0.588319	3.71465e-19	No_Change
ENSMUSG00000008999	Bmp7	0.166117	0.278097	No_Change
ENSMUSG00000009013	Dynll1	-0.159224	0.0121377	No_Change
ENSMUSG00000009030	Pdcl	-0.134663	0.142153	No_Change
ENSMUSG00000009035	Tmem184b	-0.395726	1.9038e-11	No_Change
ENSMUSG00000009070	Rsph14	0.0353821	NA	No_Change
ENSMUSG00000009073	Nf2	-0.0749435	0.289959	No_Change
ENSMUSG00000009075	Cabp7	-4.72288	2.13219e-10	KO_down
ENSMUSG00000009076	Zmat5	-0.313385	0.116891	No_Change
ENSMUSG00000009079	Ewsr1	-0.379554	2.14217e-16	No_Change
ENSMUSG00000009090	Ap1b1	0.182575	0.00624703	No_Change
ENSMUSG00000009092	Derl3	-0.217908	0.606199	No_Change
ENSMUSG00000009093	Gstt4	0.0431797	NA	No_Change
ENSMUSG00000009097	Tbx1	-1.90058	0.0212108	KO_down
ENSMUSG00000009108	Gnat2	0.1454	0.741134	No_Change
ENSMUSG00000009112	Bcl2l13	0.429314	1.08148e-09	No_Change
ENSMUSG00000009114	2610028H24Rik	-0.0822322	NA	No_Change
ENSMUSG00000009115	Spatc1l	0.00977737	NA	No_Change
ENSMUSG00000009145	Dqx1	0.255888	0.536323	No_Change
ENSMUSG00000009207	Lnpk	0.0923146	0.494906	No_Change
ENSMUSG00000009216	Fam163b	-3.19929	0.0182756	KO_down
ENSMUSG00000009246	Trpm5	0.0431387	NA	No_Change
ENSMUSG00000009248	Ascl2	2.04257	7.32692e-39	KO_up
ENSMUSG00000009281	Rarres2	0.0352895	NA	No_Change
ENSMUSG00000009291	Pttg1ip	-0.348508	1.34656e-06	No_Change
ENSMUSG00000009292	Trpm2	-0.0268721	0.92649	No_Change
ENSMUSG00000009293	Ube2g2	0.258095	0.0154913	No_Change
ENSMUSG00000009356	Lpo	0.00234977	0.994614	No_Change
ENSMUSG00000009376	Met	0.757751	0.00143478	No_Change
ENSMUSG00000009378	Slc16a12	0.653449	0.0890234	No_Change
ENSMUSG00000009394	Syn2	2.9387	1.12139e-06	KO_up
ENSMUSG00000009406	Elk1	-0.196147	0.08748	No_Change
ENSMUSG00000009418	Nav1	1.01697	3.49166e-61	KO_up
ENSMUSG00000009470	Tnpo1	-0.0638448	0.176912	No_Change
ENSMUSG00000009471	Myod1	-0.122244	NA	No_Change
ENSMUSG00000009487	Otog	-2.58488	1.4167e-05	KO_down
ENSMUSG00000009535	Rnmt	-0.693078	1.51374e-19	No_Change
ENSMUSG00000009545	Kcnq1	-0.0226594	NA	No_Change
ENSMUSG00000009549	Srp14	0.0103749	0.929465	No_Change
ENSMUSG00000009555	Cdk9	-0.346069	1.77121e-07	No_Change
ENSMUSG00000009563	Tor2a	0.119759	0.348477	No_Change
ENSMUSG00000009566	Fpgs	-1.0882	2.12104e-37	KO_down
ENSMUSG00000009569	Mrtfb	0.998777	6.20456e-29	No_Change
ENSMUSG00000009575	Cbx5	-0.0845071	0.106893	No_Change
ENSMUSG00000009585	Apobec3	-1.98882	3.73925e-80	KO_down
ENSMUSG00000009588	St6galnac1	0.149794	0.697935	No_Change
ENSMUSG00000009596	Taf7l	2.17483	4.20212e-44	KO_up
ENSMUSG00000009621	Vav2	0.704757	8.24101e-16	No_Change
ENSMUSG00000009628	Tex15	0.448402	0.00311147	No_Change
ENSMUSG00000009630	Ppp2cb	-0.0292838	0.810854	No_Change
ENSMUSG00000009633	G0s2	1.33832	0.0004731	KO_up
ENSMUSG00000009640	Dmap1	0.122765	0.392177	No_Change
ENSMUSG00000009646	Pla2g12b	0.123111	0.609137	No_Change
ENSMUSG00000009647	Mcu	-0.00464077	0.982924	No_Change
ENSMUSG00000009654	Oit3	0.0588865	NA	No_Change
ENSMUSG00000009670	Tex11	1.24176	4.85906e-11	KO_up
ENSMUSG00000009681	Bcr	0.682595	8.39273e-18	No_Change
ENSMUSG00000009687	Fxyd5	-0.253141	0.490325	No_Change
ENSMUSG00000009731	Kcnd1	-0.0697987	0.755827	No_Change
ENSMUSG00000009733	Tfcp2	0.0325175	0.86829	No_Change
ENSMUSG00000009734	Pou6f2	-0.0419627	NA	No_Change
ENSMUSG00000009739	Pou6f1	1.46059	8.62782e-21	KO_up
ENSMUSG00000009741	Ubp1	0.187024	0.00493663	No_Change
ENSMUSG00000009772	Nuak2	-1.89453	1.08423e-17	KO_down
ENSMUSG00000009828	Cilk1	-0.165532	0.37119	No_Change
ENSMUSG00000009863	Sdhb	-0.273147	0.000365517	No_Change
ENSMUSG00000009876	Cox4i2	-1.67465	0.00202943	KO_down
ENSMUSG00000009894	Snap47	0.288774	0.0050198	No_Change
ENSMUSG00000009900	Wnt3a	-0.0452966	0.920884	No_Change
ENSMUSG00000009905	Kdsr	-0.190717	0.0972738	No_Change
ENSMUSG00000009907	Vps4b	0.210951	0.00627332	No_Change
ENSMUSG00000009927	Rps25	-0.377023	1.91841e-30	No_Change
ENSMUSG00000009941	Nxf2	0.636719	0.0556146	No_Change
ENSMUSG00000009995	Taz	0.707689	2.69169e-15	No_Change
ENSMUSG00000010021	Kif19a	-0.354295	0.381273	No_Change
ENSMUSG00000010025	Aldh3a2	0.377237	2.80379e-05	No_Change
ENSMUSG00000010044	Zmynd10	-2.17374	0.000303558	KO_down
ENSMUSG00000010045	Tmem115	0.651356	0.000136691	No_Change
ENSMUSG00000010047	Hyal2	-0.47788	0.00843659	No_Change
ENSMUSG00000010048	Ifrd2	-0.279754	0.00473801	No_Change
ENSMUSG00000010051	Hyal1	-1.27094	5.58598e-08	KO_down
ENSMUSG00000010054	Tusc2	0.601468	3.51512e-05	No_Change
ENSMUSG00000010057	Nprl2	-0.024086	0.915244	No_Change
ENSMUSG00000010064	Slc38a3	-3.73704	3.61326e-11	KO_down
ENSMUSG00000010066	Cacna2d2	-0.421773	0.239833	No_Change
ENSMUSG00000010067	Rassf1	0.0431934	0.853017	No_Change
ENSMUSG00000010080	Epn3	3.42584	4.42375e-60	KO_up
ENSMUSG00000010086	Rnf112	0.364909	0.272848	No_Change
ENSMUSG00000010095	Slc3a2	-0.344978	2.70722e-12	No_Change
ENSMUSG00000010097	Nxf1	0.0298932	0.804195	No_Change
ENSMUSG00000010110	Stx5a	0.415953	0.000554722	No_Change
ENSMUSG00000010122	Slc47a1	1.06512	7.49891e-05	KO_up
ENSMUSG00000010136	Pifo	0.00860998	0.961368	No_Change
ENSMUSG00000010142	Tnfrsf13b	2.18969	1.48833e-06	KO_up
ENSMUSG00000010154	Spire2	-0.424542	0.033765	No_Change
ENSMUSG00000010175	Prox1	-0.639344	0.0241408	No_Change
ENSMUSG00000010205	Raver1	0.153668	0.0134814	No_Change
ENSMUSG00000010277	2610507B11Rik	0.204996	1.84042e-06	No_Change
ENSMUSG00000010290	AI597479	-0.077559	0.60515	No_Change
ENSMUSG00000010307	Tmem86a	0.122066	0.732747	No_Change
ENSMUSG00000010311	Optc	0.0136626	NA	No_Change
ENSMUSG00000010342	Tex14	-1.15445	1.95872e-13	KO_down
ENSMUSG00000010358	Ifi35	0.436086	0.103584	No_Change
ENSMUSG00000010362	Rdm1	-1.00899	7.20771e-05	KO_down
ENSMUSG00000010376	Nedd8	-0.248073	0.00698348	No_Change
ENSMUSG00000010392	Gosr1	0.517014	5.23015e-06	No_Change
ENSMUSG00000010406	Mrpl52	-0.797613	7.17113e-10	No_Change
ENSMUSG00000010435	Spaca7	-0.122244	NA	No_Change
ENSMUSG00000010453	Kansl3	0.109981	0.213299	No_Change
ENSMUSG00000010461	Eya4	-0.0191038	NA	No_Change
ENSMUSG00000010476	Ebf3	0.0164239	0.978682	No_Change
ENSMUSG00000010492	Uckl1os	-0.0141631	NA	No_Change
ENSMUSG00000010505	Myt1	-0.00516797	0.986656	No_Change
ENSMUSG00000010517	Faf1	0.0108037	0.904184	No_Change
ENSMUSG00000010529	Gm266	-0.154414	0.54604	No_Change
ENSMUSG00000010538	Tsacc	-0.202494	0.65452	No_Change
ENSMUSG00000010554	Mettl16	-0.0866099	0.359182	No_Change
ENSMUSG00000010592	Dazl	-0.412564	6.61001e-14	No_Change
ENSMUSG00000010601	Apol7a	0.0994736	NA	No_Change
ENSMUSG00000010607	Pigyl	-1.59942	2.66433e-25	KO_down
ENSMUSG00000010608	Rbm25	-0.331146	3.00848e-13	No_Change
ENSMUSG00000010609	Psen2	0.384472	0.0852456	No_Change
ENSMUSG00000010651	Acaa1b	-0.743173	0.00279425	No_Change
ENSMUSG00000010660	Plcd1	0.68074	1.32636e-11	No_Change
ENSMUSG00000010663	Fads1	-0.187383	0.0159787	No_Change
ENSMUSG00000010721	Lmbr1	0.559434	0.00169164	No_Change
ENSMUSG00000010751	Tnfrsf22	-0.797499	0.000563704	No_Change
ENSMUSG00000010755	Cars	-0.380558	7.4712e-11	No_Change
ENSMUSG00000010760	Phlda2	3.91621	0	KO_up
ENSMUSG00000010796	Asz1	0.92983	1.7154e-06	No_Change
ENSMUSG00000010797	Wnt2	0.0432202	NA	No_Change
ENSMUSG00000010803	Gabra1	0.0427511	NA	No_Change
ENSMUSG00000010825	Grid2ip	-0.604765	0.177493	No_Change
ENSMUSG00000010830	Kdelr3	-2.34921	2.57665e-26	KO_down
ENSMUSG00000010911	Apip	0.146535	0.500805	No_Change
ENSMUSG00000010914	Pdhx	0.112899	0.472251	No_Change
ENSMUSG00000010936	Vac14	0.0971754	0.321164	No_Change
ENSMUSG00000011008	Mcoln2	-0.0849024	NA	No_Change
ENSMUSG00000011034	Slc5a1	-2.22862	7.30985e-05	KO_down
ENSMUSG00000011096	Akt1s1	0.875936	1.19654e-13	No_Change
ENSMUSG00000011114	Tbrg1	1.13396	1.54212e-199	KO_up
ENSMUSG00000011118	Panx3	0.0591287	NA	No_Change
ENSMUSG00000011148	Adssl1	0.817404	2.1147e-10	No_Change
ENSMUSG00000011154	Cfap161	-1.69054	0.0121603	KO_down
ENSMUSG00000011158	Brf1	0.285468	0.0989506	No_Change
ENSMUSG00000011171	Vipr2	0.115242	NA	No_Change
ENSMUSG00000011179	Odc1	-0.651072	2.41821e-47	No_Change
ENSMUSG00000011254	Thg1l	-0.496962	0.00103475	No_Change
ENSMUSG00000011256	Adam19	-0.569064	1.14639e-22	No_Change
ENSMUSG00000011257	Pabpc4	-0.20715	3.39001e-07	No_Change
ENSMUSG00000011263	Exoc3l2	-0.826664	0.0748462	No_Change
ENSMUSG00000011267	Zfp296	-2.01813	4.88158e-21	KO_down
ENSMUSG00000011305	Plin5	0.0025811	0.997484	No_Change
ENSMUSG00000011306	Sugp1	0.115131	0.302622	No_Change
ENSMUSG00000011349	Dmrtc2	-0.642375	0.0875213	No_Change
ENSMUSG00000011382	Dhdh	-1.08027	4.26885e-07	KO_down
ENSMUSG00000011427	Zfp790	0.819232	0.000174212	No_Change
ENSMUSG00000011463	Cpb1	0.0431797	NA	No_Change
ENSMUSG00000011486	Slc25a41	0.181743	0.533746	No_Change
ENSMUSG00000011589	Fsd1	-0.466351	0.0248647	No_Change
ENSMUSG00000011632	Pinlyp	0.215624	0.5275	No_Change
ENSMUSG00000011658	Fuz	0.0332481	0.919528	No_Change
ENSMUSG00000011751	Sptbn4	0.0417691	0.792187	No_Change
ENSMUSG00000011752	Pgam1	-0.726105	4.03205e-64	No_Change
ENSMUSG00000011831	Evi5	-0.0754335	0.397633	No_Change
ENSMUSG00000011832	Evi5l	0.877057	1.04616e-08	No_Change
ENSMUSG00000011837	Snapc2	0.231959	0.154005	No_Change
ENSMUSG00000011877	Git1	0.488837	1.1293e-18	No_Change
ENSMUSG00000011884	Gltp	-0.437832	2.48339e-06	No_Change
ENSMUSG00000011958	Bnip2	0.745119	4.43224e-12	No_Change
ENSMUSG00000011960	Ccnt1	0.0166713	0.882927	No_Change
ENSMUSG00000012017	Scarf2	0.453729	0.219309	No_Change
ENSMUSG00000012076	Brms1l	0.497103	7.70848e-05	No_Change
ENSMUSG00000012114	Med15	0.0452482	0.628892	No_Change
ENSMUSG00000012117	Dhdds	0.633751	2.2618e-08	No_Change
ENSMUSG00000012123	Crybg2	-0.520048	0.0113571	No_Change
ENSMUSG00000012126	Ubxn11	0.499159	0.0446272	No_Change
ENSMUSG00000012187	Mogat1	0.14021	NA	No_Change
ENSMUSG00000012211	Tex22	0.00860998	0.961368	No_Change
ENSMUSG00000012282	Wnt8a	-0.694398	0.135577	No_Change
ENSMUSG00000012296	Tjap1	-0.32684	3.71757e-06	No_Change
ENSMUSG00000012350	Ehf	-0.0849024	NA	No_Change
ENSMUSG00000012396	Nanog	-3.47636	0	KO_down
ENSMUSG00000012405	Rpl15	-0.301211	2.29014e-19	No_Change
ENSMUSG00000012422	Tmem167	-0.0944347	0.460336	No_Change
ENSMUSG00000012428	Steap4	0.229906	0.0526211	No_Change
ENSMUSG00000012429	Mplkip	0.0236506	0.938667	No_Change
ENSMUSG00000012443	Kif11	-0.399701	1.56402e-11	No_Change
ENSMUSG00000012483	Rpa3	-0.316314	0.0221692	No_Change
ENSMUSG00000012519	Mlkl	3.15845	0.000282457	KO_up
ENSMUSG00000012535	Tnpo3	-0.163269	0.0016705	No_Change
ENSMUSG00000012609	Ttll5	0.505845	5.90575e-05	No_Change
ENSMUSG00000012640	Zfp715	-0.121493	0.540887	No_Change
ENSMUSG00000012705	Retn	-0.283975	0.514108	No_Change
ENSMUSG00000012819	Cdh23	1.78393	1.033e-05	KO_up
ENSMUSG00000012848	Rps5	-0.479172	7.7732e-72	No_Change
ENSMUSG00000012889	Podnl1	-0.0413687	NA	No_Change
ENSMUSG00000013033	Adgrl1	-0.257643	0.000709807	No_Change
ENSMUSG00000013076	Amotl1	-0.435774	7.22031e-06	No_Change
ENSMUSG00000013083	2200002J24Rik	-0.022442	0.93293	No_Change
ENSMUSG00000013089	Etv5	-1.94003	4.64577e-180	KO_down
ENSMUSG00000013150	Gfod2	0.108735	0.669566	No_Change
ENSMUSG00000013155	Enkd1	0.0466739	0.820166	No_Change
ENSMUSG00000013158	4933405L10Rik	-2.31499	0.0212797	KO_down
ENSMUSG00000013160	Atp6v0d1	-0.113263	0.103314	No_Change
ENSMUSG00000013236	Ptprs	0.848556	1.66507e-113	No_Change
ENSMUSG00000013275	Slc41a1	-0.298278	0.00751536	No_Change
ENSMUSG00000013338	Fer1l4	-0.0227393	0.963312	No_Change
ENSMUSG00000013353	4931406B18Rik	0.129011	NA	No_Change
ENSMUSG00000013367	Iglon5	-2.26913	0.00989307	KO_down
ENSMUSG00000013415	Igf2bp1	0.187247	1.20827e-06	No_Change
ENSMUSG00000013418	B4galnt2	1.49217	1.29564e-06	KO_up
ENSMUSG00000013419	Zfp651	1.15653	0.00152259	KO_up
ENSMUSG00000013465	Nelfb	0.151056	0.105915	No_Change
ENSMUSG00000013483	Card14	2.93593	3.3279e-20	KO_up
ENSMUSG00000013495	Tmem175	0.696622	0.000281015	No_Change
ENSMUSG00000013523	Bcas1	-0.819991	0.0248163	No_Change
ENSMUSG00000013539	Tango2	0.364525	0.0212692	No_Change
ENSMUSG00000013584	Aldh1a2	-0.275292	0.52917	No_Change
ENSMUSG00000013593	Ndufs2	-0.0719482	0.34559	No_Change
ENSMUSG00000013611	Snx31	0.378036	0.339497	No_Change
ENSMUSG00000013622	Atraid	0.00954287	0.978682	No_Change
ENSMUSG00000013629	Cad	-0.607736	3.39501e-75	No_Change
ENSMUSG00000013646	Sh3bp5l	0.199929	0.20465	No_Change
ENSMUSG00000013662	Atad1	0.146064	0.107824	No_Change
ENSMUSG00000013663	Pten	0.245151	0.000711881	No_Change
ENSMUSG00000013698	Pea15a	1.81295	4.06386e-55	KO_up
ENSMUSG00000013701	Timm23	-0.666184	9.69334e-25	No_Change
ENSMUSG00000013707	Tnfaip8l2	0.0688279	0.773322	No_Change
ENSMUSG00000013736	Trnt1	-0.085399	0.510084	No_Change
ENSMUSG00000013766	Ly6g6e	-5.55754	1.3541e-78	KO_down
ENSMUSG00000013787	Ehmt2	0.637569	9.75674e-39	No_Change
ENSMUSG00000013822	Elof1	-0.084986	0.672915	No_Change
ENSMUSG00000013833	Med16	-0.054185	0.713307	No_Change
ENSMUSG00000013846	St3gal1	1.65257	1.54687e-12	KO_up
ENSMUSG00000013858	Tmem259	0.200089	0.0032528	No_Change
ENSMUSG00000013878	Rnf170	-0.102944	0.647445	No_Change
ENSMUSG00000013921	Clip3	-0.604292	0.0666025	No_Change
ENSMUSG00000013928	1700020L13Rik	-0.135807	0.533162	No_Change
ENSMUSG00000013936	Myl2	0.938104	0.0547217	No_Change
ENSMUSG00000013973	Dedd	0.154224	0.306118	No_Change
ENSMUSG00000013974	Mcemp1	0.0136626	NA	No_Change
ENSMUSG00000013989	NA	-0.924901	0.0686642	No_Change
ENSMUSG00000013997	Nit1	0.138717	0.376924	No_Change
ENSMUSG00000014030	Pax5	-0.0850047	0.809041	No_Change
ENSMUSG00000014039	Prdm15	-0.118642	0.413991	No_Change
ENSMUSG00000014074	Rnf168	-0.266679	0.0407716	No_Change
ENSMUSG00000014075	Dynlt2b	-0.438365	0.0343977	No_Change
ENSMUSG00000014077	Chp1	0.2937	0.00218912	No_Change
ENSMUSG00000014158	Trpv4	-0.220944	0.395894	No_Change
ENSMUSG00000014164	Klhl3	0.424449	0.316066	No_Change
ENSMUSG00000014177	Tvp23b	-0.374737	0.00116528	No_Change
ENSMUSG00000014195	Dnajc7	-0.727124	6.03619e-29	No_Change
ENSMUSG00000014198	Zfp385c	-0.632072	0.149696	No_Change
ENSMUSG00000014226	Cacybp	-0.955041	2.96943e-92	No_Change
ENSMUSG00000014232	Cluap1	0.222877	0.401839	No_Change
ENSMUSG00000014243	Zswim7	-0.549497	0.0148916	No_Change
ENSMUSG00000014245	Pigl	-0.719777	4.83672e-08	No_Change
ENSMUSG00000014294	Ndufa2	-0.0964175	0.512856	No_Change
ENSMUSG00000014301	Pam16	-0.618817	0.00022426	No_Change
ENSMUSG00000014303	Glis2	-0.0244452	0.90837	No_Change
ENSMUSG00000014313	Cox6c	-0.366535	7.68163e-09	No_Change
ENSMUSG00000014329	Bicc1	-0.110579	0.752089	No_Change
ENSMUSG00000014349	Ube2z	0.506924	6.32015e-24	No_Change
ENSMUSG00000014351	Gip	-0.105553	NA	No_Change
ENSMUSG00000014353	Tmem87b	0.108738	0.343075	No_Change
ENSMUSG00000014355	Anapc1	0.136143	0.0172985	No_Change
ENSMUSG00000014361	Mertk	0.230163	0.178399	No_Change
ENSMUSG00000014402	Tsg101	-0.0294979	0.795539	No_Change
ENSMUSG00000014418	Hps5	0.793051	2.2672e-11	No_Change
ENSMUSG00000014426	Map3k4	0.627742	8.07233e-33	No_Change
ENSMUSG00000014444	Piezo1	0.912256	1.52834e-78	No_Change
ENSMUSG00000014470	Rnf166	0.647445	6.94514e-05	No_Change
ENSMUSG00000014496	Ankrd28	-0.448104	1.439e-10	No_Change
ENSMUSG00000014498	Ankrd52	0.0549828	0.689509	No_Change
ENSMUSG00000014503	Pkd2l2	-0.0273085	0.941855	No_Change
ENSMUSG00000014504	Srp19	-0.431359	4.12338e-05	No_Change
ENSMUSG00000014542	Clec4f	0.0352895	NA	No_Change
ENSMUSG00000014547	Wdfy2	0.311748	0.216956	No_Change
ENSMUSG00000014550	Rbsn	0.43332	2.14554e-05	No_Change
ENSMUSG00000014551	Mrps25	-0.0585394	0.678	No_Change
ENSMUSG00000014554	Dguok	0.532283	0.0131638	No_Change
ENSMUSG00000014592	Camta1	-0.701125	2.55742e-07	No_Change
ENSMUSG00000014599	Csf1	2.87633	1.52581e-07	KO_up
ENSMUSG00000014601	Strip1	0.275176	0.00439659	No_Change
ENSMUSG00000014602	Kif1a	-1.50648	3.47938e-09	KO_down
ENSMUSG00000014606	Slc25a11	0.578332	2.29147e-11	No_Change
ENSMUSG00000014609	Chrne	-0.0934463	0.792431	No_Change
ENSMUSG00000014633	Cmc2	-0.349581	0.095206	No_Change
ENSMUSG00000014668	Chfr	-0.0840049	0.339826	No_Change
ENSMUSG00000014686	Ceacam16	-0.640833	0.0809987	No_Change
ENSMUSG00000014704	Hoxa2	-0.0368919	NA	No_Change
ENSMUSG00000014725	Adam28	-0.0658655	NA	No_Change
ENSMUSG00000014748	Tex261	0.29339	0.00227131	No_Change
ENSMUSG00000014763	Fam120b	1.59315	7.72611e-18	KO_up
ENSMUSG00000014767	Tbp	0.0139878	0.934538	No_Change
ENSMUSG00000014769	Psmb1	-0.217153	9.01045e-05	No_Change
ENSMUSG00000014771	Pdcd2	-0.509916	0.000176499	No_Change
ENSMUSG00000014773	Dll1	-4.60778	5.16016e-46	KO_down
ENSMUSG00000014776	Nol3	-0.101099	0.797939	No_Change
ENSMUSG00000014778	Fhod1	0.310394	0.0195575	No_Change
ENSMUSG00000014782	Plekhg4	-0.666273	0.0726484	No_Change
ENSMUSG00000014786	Slc9a5	-0.137644	0.448055	No_Change
ENSMUSG00000014791	Elmo3	2.28113	3.95817e-30	KO_up
ENSMUSG00000014813	Stc1	-0.926219	0.056555	No_Change
ENSMUSG00000014837	4931428F04Rik	-0.327238	0.233264	No_Change
ENSMUSG00000014846	Tppp3	-0.860745	0.0118484	No_Change
ENSMUSG00000014850	Msh3	-0.441198	0.001172	No_Change
ENSMUSG00000014852	Adamts13	0.179013	NA	No_Change
ENSMUSG00000014856	Tmem208	-0.573878	0.00418499	No_Change
ENSMUSG00000014859	E2f4	-0.710488	1.81796e-16	No_Change
ENSMUSG00000014867	Surf4	0.136414	0.0280978	No_Change
ENSMUSG00000014873	Surf2	-0.352565	0.0251782	No_Change
ENSMUSG00000014905	Dnajb9	-0.0433411	0.872959	No_Change
ENSMUSG00000014907	Naf1	-0.469269	0.00023649	No_Change
ENSMUSG00000014932	Yes1	-0.307245	2.55309e-05	No_Change
ENSMUSG00000014956	Ppp1cb	-0.352079	2.22189e-15	No_Change
ENSMUSG00000014959	Gorasp2	0.0270861	0.789696	No_Change
ENSMUSG00000014980	Tsen15	-0.275187	0.165965	No_Change
ENSMUSG00000015001	Oc90	-1.02475	0.063481	No_Change
ENSMUSG00000015002	Efr3a	-0.0937297	0.216433	No_Change
ENSMUSG00000015013	Trappc2l	0.262617	0.155878	No_Change
ENSMUSG00000015016	Acsf3	0.623069	0.00072231	No_Change
ENSMUSG00000015023	Ddx19a	0.174214	0.03451	No_Change
ENSMUSG00000015027	Galns	1.60491	2.59655e-21	KO_up
ENSMUSG00000015053	Gata2	1.85234	1.87046e-145	KO_up
ENSMUSG00000015083	C8g	0.0473572	0.922684	No_Change
ENSMUSG00000015085	Entpd2	0.0179599	0.973317	No_Change
ENSMUSG00000015087	Rabl6	0.113063	0.161797	No_Change
ENSMUSG00000015090	Ptgds	-3.04478	0.0214515	KO_down
ENSMUSG00000015092	Edf1	-0.168317	0.274003	No_Change
ENSMUSG00000015093	Clic3	-0.0786416	0.812954	No_Change
ENSMUSG00000015094	Npdc1	-0.262162	0.145825	No_Change
ENSMUSG00000015095	Fbxw5	0.0407216	0.840025	No_Change
ENSMUSG00000015112	Slc25a13	-0.485578	5.82872e-16	No_Change
ENSMUSG00000015120	Ube2i	-0.175717	0.00158614	No_Change
ENSMUSG00000015126	Tsr3	0.0140613	0.951046	No_Change
ENSMUSG00000015127	Unkl	0.366626	0.0372472	No_Change
ENSMUSG00000015133	Lrrk1	-0.0844382	0.833275	No_Change
ENSMUSG00000015134	Aldh1a3	-1.37766	0.0404387	KO_down
ENSMUSG00000015143	Actn1	0.00193725	0.978998	No_Change
ENSMUSG00000015149	Sirt2	0.928676	6.331e-17	No_Change
ENSMUSG00000015165	Hnrnpl	-0.637663	1.50569e-69	No_Change
ENSMUSG00000015176	Nolc1	-0.754612	2.34142e-50	No_Change
ENSMUSG00000015189	Casd1	1.25724	6.80432e-09	KO_up
ENSMUSG00000015202	Cnksr3	-0.557827	0.000425755	No_Change
ENSMUSG00000015214	Mtmr1	0.662957	2.23696e-06	No_Change
ENSMUSG00000015217	Hmgb3	-0.185929	0.306767	No_Change
ENSMUSG00000015222	Map2	-1.05619	0.00203896	KO_down
ENSMUSG00000015224	Cyp2j9	-0.257234	0.55404	No_Change
ENSMUSG00000015243	Abca1	0.518707	2.24984e-05	No_Change
ENSMUSG00000015247	Nipsnap3b	-0.284389	0.0366483	No_Change
ENSMUSG00000015289	Lage3	-0.528337	9.76479e-06	No_Change
ENSMUSG00000015290	Ubl4a	0.558527	5.77051e-07	No_Change
ENSMUSG00000015291	Gdi1	0.246069	1.02274e-06	No_Change
ENSMUSG00000015305	Sash1	-0.441009	3.28519e-09	No_Change
ENSMUSG00000015312	Gadd45b	0.226119	0.00170225	No_Change
ENSMUSG00000015314	Slamf6	-0.294468	0.087071	No_Change
ENSMUSG00000015335	Zdhhc12	0.381568	8.58999e-05	No_Change
ENSMUSG00000015337	Endog	0.384374	0.116189	No_Change
ENSMUSG00000015340	Cybb	-0.37594	0.0538101	No_Change
ENSMUSG00000015341	Golga7	-0.500338	1.5663e-11	No_Change
ENSMUSG00000015342	Xk	0.230532	0.402814	No_Change
ENSMUSG00000015354	Pcolce2	-4.65103	8.45883e-34	KO_down
ENSMUSG00000015355	Cd48	0.0353821	NA	No_Change
ENSMUSG00000015357	Clpx	0.521701	2.36578e-09	No_Change
ENSMUSG00000015363	Trabd	-0.14812	0.276915	No_Change
ENSMUSG00000015365	Mov10l1	0.583857	1.72213e-05	No_Change
ENSMUSG00000015377	Dennd6b	-0.646581	0.00395828	No_Change
ENSMUSG00000015396	Cd83	-0.076617	NA	No_Change
ENSMUSG00000015401	Cltrn	0.0353821	NA	No_Change
ENSMUSG00000015443	Gzmn	-0.0413687	NA	No_Change
ENSMUSG00000015451	C4a	0.20936	0.637654	No_Change
ENSMUSG00000015452	Ager	0.327806	0.454594	No_Change
ENSMUSG00000015461	Atf6b	-0.36707	0.00560916	No_Change
ENSMUSG00000015467	Egfl8	-0.258433	0.50719	No_Change
ENSMUSG00000015468	Notch4	-3.50444	1.48182e-22	KO_down
ENSMUSG00000015474	Ppt2	-0.378262	0.15165	No_Change
ENSMUSG00000015476	Prrt1	-0.0822322	NA	No_Change
ENSMUSG00000015478	Rnf5	-0.0479495	0.74769	No_Change
ENSMUSG00000015484	Fam163a	-3.33954	0.000924524	KO_down
ENSMUSG00000015488	Cacfd1	0.662461	0.00139718	No_Change
ENSMUSG00000015501	Hivep2	1.01061	0.000213528	KO_up
ENSMUSG00000015522	Arnt	-0.100959	0.0685119	No_Change
ENSMUSG00000015533	Itga2	0.0353821	NA	No_Change
ENSMUSG00000015536	Mocs2	-0.555166	0.00202512	No_Change
ENSMUSG00000015542	Nat9	0.252003	0.155852	No_Change
ENSMUSG00000015568	Lpl	0.924355	8.04783e-40	No_Change
ENSMUSG00000015575	Atp6v0e	0.28042	0.0074911	No_Change
ENSMUSG00000015579	Nkx2-5	-0.154414	0.54604	No_Change
ENSMUSG00000015597	Zfp318	0.295041	0.000679554	No_Change
ENSMUSG00000015599	Ttbk1	-0.254435	0.538331	No_Change
ENSMUSG00000015605	Srf	-0.0442281	0.770915	No_Change
ENSMUSG00000015619	Gata3	1.96382	9.88686e-40	KO_up
ENSMUSG00000015627	Gata5	0.0132991	NA	No_Change
ENSMUSG00000015647	Lama5	0.348581	2.66145e-23	No_Change
ENSMUSG00000015652	Steap1	-0.641885	0.0550678	No_Change
ENSMUSG00000015653	Steap2	0.917271	3.26419e-06	No_Change
ENSMUSG00000015656	Hspa8	0.248254	4.18411e-33	No_Change
ENSMUSG00000015659	Serac1	-0.469736	8.37544e-05	No_Change
ENSMUSG00000015665	Awat1	0.0432202	NA	No_Change
ENSMUSG00000015668	Pdzd11	0.092202	0.390879	No_Change
ENSMUSG00000015671	Psma2	-0.246247	4.68936e-05	No_Change
ENSMUSG00000015672	Mrpl32	0.0868295	0.571399	No_Change
ENSMUSG00000015697	Setdb1	0.177985	0.00470146	No_Change
ENSMUSG00000015702	Anxa9	0.227289	0.614016	No_Change
ENSMUSG00000015709	Arnt2	-1.16427	0.0055576	KO_down
ENSMUSG00000015711	Prune1	0.296773	2.19314e-05	No_Change
ENSMUSG00000015714	Cers2	0.820119	1.27596e-27	No_Change
ENSMUSG00000015721	Nlrp5	0.0431797	NA	No_Change
ENSMUSG00000015733	Capza2	-0.0406537	0.619892	No_Change
ENSMUSG00000015745	Plekho1	-1.61843	2.54462e-05	KO_down
ENSMUSG00000015747	Vps45	0.0532499	0.822481	No_Change
ENSMUSG00000015748	Prpf3	-0.458816	9.07508e-07	No_Change
ENSMUSG00000015749	Anp32e	-0.57775	1.35007e-22	No_Change
ENSMUSG00000015750	Aph1a	0.0262442	0.889305	No_Change
ENSMUSG00000015755	Tab2	0.292752	2.34521e-05	No_Change
ENSMUSG00000015757	Ppil4	-0.173075	0.116617	No_Change
ENSMUSG00000015759	Cnih1	0.369302	7.8466e-05	No_Change
ENSMUSG00000015766	Eps8	0.243476	0.0655477	No_Change
ENSMUSG00000015776	Med22	0.329017	0.0101616	No_Change
ENSMUSG00000015787	Abo	-0.00638576	NA	No_Change
ENSMUSG00000015790	Surf1	0.369104	0.0293286	No_Change
ENSMUSG00000015804	Med28	0.241585	0.0210561	No_Change
ENSMUSG00000015806	Qdpr	-0.702827	2.25389e-18	No_Change
ENSMUSG00000015812	Gnrh1	-0.18143	0.632675	No_Change
ENSMUSG00000015837	Sqstm1	0.71266	1.11355e-57	No_Change
ENSMUSG00000015839	Nfe2l2	0.537541	3.15021e-17	No_Change
ENSMUSG00000015846	Rxra	1.18035	5.19849e-26	KO_up
ENSMUSG00000015850	Adamtsl4	-0.642818	0.000857704	No_Change
ENSMUSG00000015854	Cd5l	0.0485416	NA	No_Change
ENSMUSG00000015869	Prpsap1	-0.174804	0.015527	No_Change
ENSMUSG00000015879	Fam184b	-0.311802	0.239551	No_Change
ENSMUSG00000015880	Ncapg	-0.605757	5.98538e-19	No_Change
ENSMUSG00000015882	Lcorl	0.187279	0.183194	No_Change
ENSMUSG00000015889	Lta4h	-0.127096	0.193696	No_Change
ENSMUSG00000015932	Dstn	-0.441511	3.99447e-16	No_Change
ENSMUSG00000015937	Macroh2a1	-0.678279	1.29386e-36	No_Change
ENSMUSG00000015942	Gtf2ird2	0.489909	0.21	No_Change
ENSMUSG00000015943	Bola1	-0.652605	0.00280952	No_Change
ENSMUSG00000015944	Castor2	1.36176	3.18741e-28	KO_up
ENSMUSG00000015950	Ncf1	0.129369	0.769176	No_Change
ENSMUSG00000015957	Wnt11	-1.15497	0.0344593	KO_down
ENSMUSG00000015961	Adss	-0.221447	0.00172178	No_Change
ENSMUSG00000015966	Il17rb	4.67863	3.4315e-07	KO_up
ENSMUSG00000015968	Cacna1d	0.0296414	0.955201	No_Change
ENSMUSG00000015970	Chdh	3.88109	4.03423e-56	KO_up
ENSMUSG00000015971	Actr8	-0.203174	0.0983997	No_Change
ENSMUSG00000015980	Lrrc27	1.60407	0.000477755	KO_up
ENSMUSG00000015981	Stk32c	0.156321	0.70516	No_Change
ENSMUSG00000015994	Fnta	-0.464213	2.67606e-09	No_Change
ENSMUSG00000016018	Mtrex	-0.033568	0.713331	No_Change
ENSMUSG00000016024	Lbp	0.89949	0.0793473	No_Change
ENSMUSG00000016028	Celsr1	0.0793323	0.476806	No_Change
ENSMUSG00000016087	Fli1	-0.0413687	NA	No_Change
ENSMUSG00000016128	Stard13	0.143629	0.671446	No_Change
ENSMUSG00000016179	Camk1g	0.0352895	NA	No_Change
ENSMUSG00000016181	Utp25	-0.290566	0.0612345	No_Change
ENSMUSG00000016194	Hsd11b1	3.20936	0.00366313	KO_up
ENSMUSG00000016200	Syt14	0.176038	0.63467	No_Change
ENSMUSG00000016206	H2-M3	0.347463	0.419079	No_Change
ENSMUSG00000016239	Lonrf3	2.78277	5.70926e-17	KO_up
ENSMUSG00000016252	Atp5e	-0.375269	0.000134024	No_Change
ENSMUSG00000016253	Nelfcd	-0.0964658	0.340511	No_Change
ENSMUSG00000016255	Tubb1	-0.0727608	NA	No_Change
ENSMUSG00000016256	Ctsz	-0.0014753	0.991453	No_Change
ENSMUSG00000016257	Prelid3b	0.0813305	0.463127	No_Change
ENSMUSG00000016262	Sertad4	-0.0214995	0.955279	No_Change
ENSMUSG00000016308	Ube2a	-0.452056	3.36319e-05	No_Change
ENSMUSG00000016319	Slc25a5	-1.21749	3.07841e-215	KO_down
ENSMUSG00000016344	Ppdpf	-0.577321	9.36871e-06	No_Change
ENSMUSG00000016346	Kcnq2	-0.989166	0.0507563	No_Change
ENSMUSG00000016349	Eef1a2	-1.24824	0.0498054	KO_down
ENSMUSG00000016356	Col20a1	0.546139	0.00815241	No_Change
ENSMUSG00000016382	Pls3	-0.0737921	0.624204	No_Change
ENSMUSG00000016386	Mpped2	-0.112142	0.739093	No_Change
ENSMUSG00000016409	Nkap	-0.234853	0.0939707	No_Change
ENSMUSG00000016427	Ndufa1	-0.198355	0.126464	No_Change
ENSMUSG00000016458	Wt1	0.25701	0.403933	No_Change
ENSMUSG00000016477	E2f3	0.937505	1.35335e-14	No_Change
ENSMUSG00000016481	Cr1l	0.868121	1.67304e-06	No_Change
ENSMUSG00000016487	Ppfibp1	0.515534	1.09211e-12	No_Change
ENSMUSG00000016493	Cd46	0.719429	0.0795643	No_Change
ENSMUSG00000016494	Cd34	-0.0400738	0.929593	No_Change
ENSMUSG00000016495	Plgrkt	0.469427	0.0346035	No_Change
ENSMUSG00000016496	Cd274	2.78129	1.37768e-07	KO_up
ENSMUSG00000016503	Gtf3a	-0.443539	2.48368e-07	No_Change
ENSMUSG00000016510	Mtif3	0.535633	0.00106178	No_Change
ENSMUSG00000016520	Lnx2	0.549181	2.68988e-05	No_Change
ENSMUSG00000016526	Dyrk3	-0.512036	3.54704e-05	No_Change
ENSMUSG00000016528	Mapkapk2	0.587987	9.43482e-09	No_Change
ENSMUSG00000016529	Il10	-0.103953	0.625233	No_Change
ENSMUSG00000016534	Lamp2	0.229653	0.00102819	No_Change
ENSMUSG00000016541	Atxn10	0.479713	4.50928e-47	No_Change
ENSMUSG00000016552	Foxred2	-0.826796	2.30137e-06	No_Change
ENSMUSG00000016554	Eif3d	-0.128253	0.00184658	No_Change
ENSMUSG00000016559	H3f3b	0.193921	3.82779e-08	No_Change
ENSMUSG00000016619	Nup50	0.0990706	0.193597	No_Change
ENSMUSG00000016624	Phf21b	-1.42065	4.31975e-06	KO_down
ENSMUSG00000016626	Nlrp14	-0.053019	0.894688	No_Change
ENSMUSG00000016637	Ift27	0.0256114	0.944519	No_Change
ENSMUSG00000016664	Pacsin2	0.678392	2.52629e-37	No_Change
ENSMUSG00000016756	Cmah	0.391257	0.165683	No_Change
ENSMUSG00000016757	Ttll12	1.31465	6.81664e-91	KO_up
ENSMUSG00000016758	Bik	0.754185	0.00408365	No_Change
ENSMUSG00000016763	Scube1	1.93475	0.000225422	KO_up
ENSMUSG00000016831	Tox4	-0.0479336	0.556561	No_Change
ENSMUSG00000016833	Mrps18c	-0.335224	0.332723	No_Change
ENSMUSG00000016918	Sulf1	-1.12227	0.000775348	KO_down
ENSMUSG00000016921	Srsf6	-0.410104	4.05141e-11	No_Change
ENSMUSG00000016933	Plcg1	-0.539317	7.73471e-20	No_Change
ENSMUSG00000016940	Kctd2	0.199917	0.22818	No_Change
ENSMUSG00000016942	Tmprss6	1.99894	0.00347798	KO_up
ENSMUSG00000016946	Kctd5	-0.465354	9.3175e-07	No_Change
ENSMUSG00000016984	Etaa1	-0.495859	4.35976e-05	No_Change
ENSMUSG00000016995	Matn4	-0.173121	0.518906	No_Change
ENSMUSG00000017009	Sdc4	-0.311243	4.03159e-12	No_Change
ENSMUSG00000017057	Il13ra1	1.53194	1.76707e-07	KO_up
ENSMUSG00000017119	Nbr1	-0.0234255	0.719048	No_Change
ENSMUSG00000017132	Cyth1	0.803951	1.42762e-06	No_Change
ENSMUSG00000017144	Rnd3	-0.685117	3.47563e-06	No_Change
ENSMUSG00000017146	Brca1	-0.392851	2.77804e-10	No_Change
ENSMUSG00000017167	Cntnap1	0.0795202	0.81794	No_Change
ENSMUSG00000017176	Nt5c3b	0.0366555	0.857349	No_Change
ENSMUSG00000017188	Coa3	0.0333333	0.884527	No_Change
ENSMUSG00000017195	Zpbp2	-0.021544	NA	No_Change
ENSMUSG00000017204	Gsdma	0.129027	0.775967	No_Change
ENSMUSG00000017210	Med24	-0.119497	0.177565	No_Change
ENSMUSG00000017221	Psmd3	-0.169694	5.4494e-05	No_Change
ENSMUSG00000017264	Exosc10	0.0579028	0.544895	No_Change
ENSMUSG00000017286	Glod4	-0.184456	0.130313	No_Change
ENSMUSG00000017288	Vps53	0.835972	7.48187e-13	No_Change
ENSMUSG00000017291	Taok1	0.623087	5.05866e-27	No_Change
ENSMUSG00000017299	Dnttip1	0.19619	0.198455	No_Change
ENSMUSG00000017300	Tnnc2	-0.0201862	0.955279	No_Change
ENSMUSG00000017307	Acot8	-0.136979	0.547055	No_Change
ENSMUSG00000017309	Cd300lg	0.0595922	NA	No_Change
ENSMUSG00000017310	Spint4	-0.047308	NA	No_Change
ENSMUSG00000017311	Pyy	-0.274721	0.478155	No_Change
ENSMUSG00000017314	Mpp2	-0.00354469	0.988539	No_Change
ENSMUSG00000017316	Ppy	0.0352895	NA	No_Change
ENSMUSG00000017376	Nlk	0.139478	0.10648	No_Change
ENSMUSG00000017386	Traf4	0.0101789	0.927601	No_Change
ENSMUSG00000017390	Aldoc	-0.315053	0.000688457	No_Change
ENSMUSG00000017400	Stac2	-1.63024	3.64908e-42	KO_down
ENSMUSG00000017404	Rpl19	-0.4407	5.52317e-71	No_Change
ENSMUSG00000017405	Nek8	-0.0120819	0.964293	No_Change
ENSMUSG00000017412	Cacnb4	0.0322288	0.937324	No_Change
ENSMUSG00000017417	Plxdc1	-1.75853	7.91424e-13	KO_down
ENSMUSG00000017418	Arl5b	-0.38608	3.14131e-05	No_Change
ENSMUSG00000017421	Zfp207	-0.0480538	0.498232	No_Change
ENSMUSG00000017428	Psmd11	-0.309961	3.2163e-09	No_Change
ENSMUSG00000017446	C1qtnf1	-0.00489341	NA	No_Change
ENSMUSG00000017453	Pipox	-3.31542	1.13161e-75	KO_down
ENSMUSG00000017466	Timp2	1.54836	9.57009e-15	KO_up
ENSMUSG00000017478	Zc3h18	0.0683042	0.397187	No_Change
ENSMUSG00000017485	Top2b	0.487571	2.80506e-13	No_Change
ENSMUSG00000017491	Rarb	1.54449	0.000607264	KO_up
ENSMUSG00000017493	Igfbp4	0.129782	0.289685	No_Change
ENSMUSG00000017499	Cdc6	-0.215006	0.0173537	No_Change
ENSMUSG00000017548	Suz12	-0.439158	2.95929e-26	No_Change
ENSMUSG00000017550	Atad5	-0.23627	0.00512592	No_Change
ENSMUSG00000017561	Crlf3	-0.032818	0.768635	No_Change
ENSMUSG00000017607	Tns4	1.27263	3.52286e-10	KO_up
ENSMUSG00000017615	Tnfaip1	0.739479	1.84957e-20	No_Change
ENSMUSG00000017631	Abr	0.787455	4.57244e-24	No_Change
ENSMUSG00000017639	Rab11fip4	0.30183	1.29917e-08	No_Change
ENSMUSG00000017652	Cd40	0.992667	0.0205067	No_Change
ENSMUSG00000017664	Slc35c2	-0.204533	0.0972738	No_Change
ENSMUSG00000017667	Zfp334	-0.477351	0.114508	No_Change
ENSMUSG00000017670	Elmo2	-0.793757	2.5942e-21	No_Change
ENSMUSG00000017677	Wsb1	-0.600425	7.24863e-16	No_Change
ENSMUSG00000017679	Ttpal	0.993606	1.82626e-06	No_Change
ENSMUSG00000017686	Rhot1	0.105934	0.18812	No_Change
ENSMUSG00000017692	Rhbdl3	-0.719904	0.136543	No_Change
ENSMUSG00000017697	Ada	-0.446569	0.00394027	No_Change
ENSMUSG00000017707	Serinc3	-0.0576227	0.419568	No_Change
ENSMUSG00000017713	Tha1	0.486734	0.274982	No_Change
ENSMUSG00000017715	Pgs1	-0.194976	0.0327665	No_Change
ENSMUSG00000017716	Birc5	-0.343592	7.65608e-06	No_Change
ENSMUSG00000017718	Afmid	0.524916	0.118556	No_Change
ENSMUSG00000017720	Trp53tg5	-0.0413687	NA	No_Change
ENSMUSG00000017721	Pigt	0.225397	0.00419543	No_Change
ENSMUSG00000017723	Wfdc2	0.645478	1.85588e-11	No_Change
ENSMUSG00000017724	Etv4	-4.40957	3.1635e-50	KO_down
ENSMUSG00000017734	Dbndd2	0.744825	0.0968756	No_Change
ENSMUSG00000017737	Mmp9	0.699274	0.044006	No_Change
ENSMUSG00000017740	Slc12a5	0.0204469	0.972665	No_Change
ENSMUSG00000017747	Ghdc	-0.00512737	0.982924	No_Change
ENSMUSG00000017754	Pltp	1.27189	8.351e-56	KO_up
ENSMUSG00000017756	Slc12a7	-0.834608	2.85037e-110	No_Change
ENSMUSG00000017760	Ctsa	-0.104593	0.0570881	No_Change
ENSMUSG00000017764	Zswim1	-1.0543	1.86598e-34	KO_down
ENSMUSG00000017765	Slc12a4	-0.288317	0.000672452	No_Change
ENSMUSG00000017767	Spata25	0.197842	0.454109	No_Change
ENSMUSG00000017774	Myo1c	1.06774	4.30126e-87	KO_up
ENSMUSG00000017776	Crk	0.564389	7.01507e-21	No_Change
ENSMUSG00000017778	Cox7c	-0.444382	5.1395e-16	No_Change
ENSMUSG00000017781	Pitpna	0.721927	2.90323e-21	No_Change
ENSMUSG00000017801	Mlx	0.0601942	0.746781	No_Change
ENSMUSG00000017802	Retreg3	0.726622	1.58628e-16	No_Change
ENSMUSG00000017817	Jph2	3.12956	1.42994e-26	KO_up
ENSMUSG00000017830	Dhx58	-0.147189	0.727867	No_Change
ENSMUSG00000017831	Rab5a	-0.0200353	0.848794	No_Change
ENSMUSG00000017832	Hspb9	0.0353821	NA	No_Change
ENSMUSG00000017837	Nkiras2	-0.0875084	0.509263	No_Change
ENSMUSG00000017843	Ppp2r5c	0.16988	0.000438173	No_Change
ENSMUSG00000017858	Ift52	-0.253222	0.0322596	No_Change
ENSMUSG00000017861	Mybl2	-1.05682	1.82309e-194	KO_down
ENSMUSG00000017868	Sgk2	2.7827	4.27042e-11	KO_up
ENSMUSG00000017897	Eya2	1.70134	0.0056233	KO_up
ENSMUSG00000017929	B4galt5	0.893995	1.31423e-39	No_Change
ENSMUSG00000017943	Gdap1l1	0.0588696	0.90837	No_Change
ENSMUSG00000017950	Hnf4a	-0.455225	0.151745	No_Change
ENSMUSG00000017969	Ptgis	-0.800996	0.0295743	No_Change
ENSMUSG00000017978	Cadps2	0.194795	0.371122	No_Change
ENSMUSG00000017999	Ddx27	-0.194146	0.00434559	No_Change
ENSMUSG00000018001	Cyth3	0.574704	2.22716e-06	No_Change
ENSMUSG00000018008	Cyth4	2.7915	0.0036196	KO_up
ENSMUSG00000018012	Rac3	0.916825	7.6779e-05	No_Change
ENSMUSG00000018040	Rrp7a	0.676076	1.76421e-18	No_Change
ENSMUSG00000018042	Cyb5r3	0.0889251	0.115885	No_Change
ENSMUSG00000018068	Ints2	-0.300489	0.000300512	No_Change
ENSMUSG00000018076	Med13l	-0.0553226	0.361446	No_Change
ENSMUSG00000018102	H2bc4	0.386098	0.342098	No_Change
ENSMUSG00000018126	Baiap2l2	-0.556514	0.203745	No_Change
ENSMUSG00000018143	Mafk	0.376776	0.0182012	No_Change
ENSMUSG00000018160	Med1	0.420017	2.73868e-09	No_Change
ENSMUSG00000018166	Erbb3	0.642097	1.85587e-16	No_Change
ENSMUSG00000018167	Stard3	0.372111	0.0324939	No_Change
ENSMUSG00000018168	Ikzf3	0.0855285	NA	No_Change
ENSMUSG00000018169	Mfng	-2.63844	1.75157e-10	KO_down
ENSMUSG00000018171	Vmp1	0.230861	0.0181589	No_Change
ENSMUSG00000018189	Uchl5	-0.371678	8.51713e-05	No_Change
ENSMUSG00000018196	Glrx2	-0.164722	0.455887	No_Change
ENSMUSG00000018199	Ro60	-0.100018	0.445832	No_Change
ENSMUSG00000018209	Stk4	0.270874	4.82232e-05	No_Change
ENSMUSG00000018217	Pmp22	2.34164	1.51584e-12	KO_up
ENSMUSG00000018238	Gdf9	-0.292474	0.447918	No_Change
ENSMUSG00000018239	Zcchc10	-0.715982	2.89403e-08	No_Change
ENSMUSG00000018263	Tbx5	-0.204013	0.169723	No_Change
ENSMUSG00000018286	Psmb6	-0.377016	6.17881e-13	No_Change
ENSMUSG00000018287	Spag7	-0.383448	5.5617e-06	No_Change
ENSMUSG00000018293	Pfn1	0.0219487	0.700733	No_Change
ENSMUSG00000018322	Tomm34	-0.485507	4.09701e-07	No_Change
ENSMUSG00000018326	Ywhab	0.0929557	0.133776	No_Change
ENSMUSG00000018334	Ksr1	1.06394	4.21193e-32	KO_up
ENSMUSG00000018339	Gpx3	0.0135222	0.943815	No_Change
ENSMUSG00000018340	Anxa6	1.36873	6.75298e-148	KO_up
ENSMUSG00000018341	Il12rb2	-0.0127462	NA	No_Change
ENSMUSG00000018347	Zkscan6	0.442768	0.0385476	No_Change
ENSMUSG00000018362	Kpna2	-0.291136	3.53317e-08	No_Change
ENSMUSG00000018363	Smurf2	0.0870132	0.377963	No_Change
ENSMUSG00000018372	Cep95	0.153701	0.310559	No_Change
ENSMUSG00000018377	Vezf1	0.0216052	0.836371	No_Change
ENSMUSG00000018378	Cuedc1	0.729085	1.32831e-08	No_Change
ENSMUSG00000018379	Srsf1	-0.364309	2.99713e-17	No_Change
ENSMUSG00000018381	Abi3	-0.549862	0.121404	No_Change
ENSMUSG00000018387	Shroom1	0.216609	0.605188	No_Change
ENSMUSG00000018395	Kif3a	0.609136	6.43585e-11	No_Change
ENSMUSG00000018398	Septin8	1.10415	1.70911e-62	KO_up
ENSMUSG00000018401	Mtmr4	0.407921	4.20917e-08	No_Change
ENSMUSG00000018405	Mrm1	0.0231521	0.925915	No_Change
ENSMUSG00000018411	Mapt	0.215742	0.128984	No_Change
ENSMUSG00000018412	Kansl1	-0.0306782	0.726404	No_Change
ENSMUSG00000018415	Gid4	-0.333856	2.42474e-05	No_Change
ENSMUSG00000018417	Myo1b	0.181473	0.00613997	No_Change
ENSMUSG00000018425	Dhx40	-0.212477	0.0335806	No_Change
ENSMUSG00000018427	Ypel2	-0.913587	6.65204e-16	No_Change
ENSMUSG00000018428	Akap1	-0.115987	0.026937	No_Change
ENSMUSG00000018433	Nol11	-0.308178	3.82122e-05	No_Change
ENSMUSG00000018442	Derl2	0.401276	0.00115929	No_Change
ENSMUSG00000018446	C1qbp	-0.327658	6.80342e-12	No_Change
ENSMUSG00000018449	Rpain	0.165986	0.291208	No_Change
ENSMUSG00000018451	6330403K07Rik	-0.584241	0.194383	No_Change
ENSMUSG00000018459	Slc13a3	-0.00489341	NA	No_Change
ENSMUSG00000018470	Kcnab3	-1.06585	0.000960222	KO_down
ENSMUSG00000018474	Chd3	-0.500711	4.83771e-07	No_Change
ENSMUSG00000018476	Kdm6b	0.363606	4.39564e-11	No_Change
ENSMUSG00000018479	1700125H20Rik	0.292908	0.352807	No_Change
ENSMUSG00000018481	Appbp2	0.431834	2.08769e-15	No_Change
ENSMUSG00000018486	Wnt9b	0.115242	NA	No_Change
ENSMUSG00000018500	Adora2b	-0.620954	0.153315	No_Change
ENSMUSG00000018501	Ncor1	0.192174	1.25746e-05	No_Change
ENSMUSG00000018507	Trpv2	1.81767	2.74115e-15	KO_up
ENSMUSG00000018509	Cenpv	-0.548912	2.20111e-06	No_Change
ENSMUSG00000018537	Pcgf2	-0.261917	0.00259769	No_Change
ENSMUSG00000018541	Cwc25	0.0495952	0.741796	No_Change
ENSMUSG00000018543	1700001P01Rik	-3.64754	0.00149641	KO_down
ENSMUSG00000018547	Pip4k2b	-0.0885946	0.259621	No_Change
ENSMUSG00000018548	Trim37	-0.0019065	0.985816	No_Change
ENSMUSG00000018554	Ybx2	-0.56834	0.000120941	No_Change
ENSMUSG00000018559	Ctdnep1	0.424893	0.00027408	No_Change
ENSMUSG00000018565	Elp5	0.130561	0.29297	No_Change
ENSMUSG00000018566	Slc2a4	-0.122532	0.707312	No_Change
ENSMUSG00000018567	Gabarap	0.0625817	0.535689	No_Change
ENSMUSG00000018569	Cldn7	1.65169	6.02895e-39	KO_up
ENSMUSG00000018570	2810408A11Rik	-1.39475	7.39571e-05	KO_down
ENSMUSG00000018572	Phf23	0.0546039	0.62742	No_Change
ENSMUSG00000018574	Acadvl	0.30523	0.00148992	No_Change
ENSMUSG00000018581	Dnah11	1.80029	1.23532e-07	KO_up
ENSMUSG00000018583	G3bp1	-0.560258	6.41904e-57	No_Change
ENSMUSG00000018585	Atox1	-0.800559	2.45111e-13	No_Change
ENSMUSG00000018593	Sparc	-0.269304	1.67849e-09	No_Change
ENSMUSG00000018599	Mief2	0.252689	0.147966	No_Change
ENSMUSG00000018604	Tbx3	-1.07285	2.16434e-80	KO_down
ENSMUSG00000018620	Mmp20	-0.104425	NA	No_Change
ENSMUSG00000018634	Crhr1	3.39733	0.0136534	KO_up
ENSMUSG00000018648	Dusp14	0.0217754	0.946109	No_Change
ENSMUSG00000018651	Tada2a	-0.641871	3.74144e-13	No_Change
ENSMUSG00000018654	Ikzf1	-0.651282	0.0878628	No_Change
ENSMUSG00000018659	Pnpo	0.646258	1.64014e-09	No_Change
ENSMUSG00000018661	Cog1	0.427002	0.000526693	No_Change
ENSMUSG00000018666	Cbx1	-0.894249	1.46258e-69	No_Change
ENSMUSG00000018669	Cdk5rap3	-0.306288	0.00028475	No_Change
ENSMUSG00000018672	Copz2	-0.905536	3.3803e-09	No_Change
ENSMUSG00000018677	Slc25a39	-0.57747	2.48435e-30	No_Change
ENSMUSG00000018678	Sp2	-0.339201	0.000139377	No_Change
ENSMUSG00000018697	Aatf	-0.200615	0.117015	No_Change
ENSMUSG00000018698	Lhx1	0.00456939	0.988645	No_Change
ENSMUSG00000018707	Dync1h1	0.363919	1.85886e-47	No_Change
ENSMUSG00000018727	Cpsf4l	-1.11392	0.00766475	KO_down
ENSMUSG00000018733	Pex12	-0.00545429	0.988508	No_Change
ENSMUSG00000018736	Ndel1	-0.185205	0.0575414	No_Change
ENSMUSG00000018740	Slc25a35	-1.72971	7.41731e-07	KO_down
ENSMUSG00000018750	Zbtb4	1.20595	0.000100084	KO_up
ENSMUSG00000018752	Tnfsfm13	-0.561616	0.0214756	No_Change
ENSMUSG00000018761	Mpdu1	-0.105513	0.461243	No_Change
ENSMUSG00000018765	Fxr2	0.0310354	0.609137	No_Change
ENSMUSG00000018770	Atp5g3	-0.0875374	0.120281	No_Change
ENSMUSG00000018774	Cd68	-0.220832	0.123597	No_Change
ENSMUSG00000018776	Slc35g3	-0.0273917	0.922541	No_Change
ENSMUSG00000018796	Acsl1	-0.108115	0.249877	No_Change
ENSMUSG00000018800	Abca5	1.00904	3.7304e-07	KO_up
ENSMUSG00000018809	Smyd4	-0.242766	0.195078	No_Change
ENSMUSG00000018819	Lsp1	2.34824	3.78693e-05	KO_up
ENSMUSG00000018820	Zfyve27	0.109846	0.397469	No_Change
ENSMUSG00000018821	Avpi1	-1.45976	8.27107e-35	KO_down
ENSMUSG00000018822	Sfrp5	-3.86199	1.39092e-06	KO_down
ENSMUSG00000018830	Myh11	1.15647	0.0189348	KO_up
ENSMUSG00000018841	Rad51d	0.186241	0.206321	No_Change
ENSMUSG00000018845	Unc45b	4.40989	1.88067e-16	KO_up
ENSMUSG00000018846	Pank3	0.967231	3.07583e-49	No_Change
ENSMUSG00000018848	Rars	-0.42276	1.7293e-13	No_Change
ENSMUSG00000018849	Wwc1	0.214485	0.00615111	No_Change
ENSMUSG00000018858	Mrpl58	-0.0524905	0.789864	No_Change
ENSMUSG00000018861	Fdxr	0.343232	0.0142913	No_Change
ENSMUSG00000018862	Otop3	0.0352895	NA	No_Change
ENSMUSG00000018865	Sult4a1	-1.2019	4.83625e-18	KO_down
ENSMUSG00000018882	Mrpl45	-0.499544	4.0987e-11	No_Change
ENSMUSG00000018893	Mb	-0.136819	0.708651	No_Change
ENSMUSG00000018899	Irf1	1.29027	2.99787e-27	KO_up
ENSMUSG00000018900	Slc22a5	0.938546	3.52894e-05	No_Change
ENSMUSG00000018906	P4ha2	0.224477	0.0293788	No_Change
ENSMUSG00000018907	Alox12e	-0.294468	0.087071	No_Change
ENSMUSG00000018909	Arrb1	1.65503	2.95152e-69	KO_up
ENSMUSG00000018919	Tm4sf5	-4.08996	0.00503371	KO_down
ENSMUSG00000018920	Cxcl16	-0.522405	0.234127	No_Change
ENSMUSG00000018921	Pelp1	-0.535455	1.58187e-16	No_Change
ENSMUSG00000018923	Med11	-0.409117	0.0537374	No_Change
ENSMUSG00000018924	Alox15	-0.0419627	NA	No_Change
ENSMUSG00000018927	Ccl6	-0.141961	NA	No_Change
ENSMUSG00000018931	Natd1	0.311799	0.00316917	No_Change
ENSMUSG00000018932	Map2k3	0.290223	0.000698789	No_Change
ENSMUSG00000018965	Ywhah	0.553923	3.32925e-20	No_Change
ENSMUSG00000018973	Hoxb1	-0.00657362	NA	No_Change
ENSMUSG00000018974	Sart3	-0.144487	0.0608907	No_Change
ENSMUSG00000018983	E2f2	0.0812532	0.719704	No_Change
ENSMUSG00000018986	Slfn3	-0.325184	0.440471	No_Change
ENSMUSG00000018995	Nars2	-0.117993	0.564947	No_Change
ENSMUSG00000018999	Slc35b4	0.395481	0.000954489	No_Change
ENSMUSG00000019027	Dnah1	2.14296	4.72168e-07	KO_up
ENSMUSG00000019039	Dalrd3	-0.295199	0.0121553	No_Change
ENSMUSG00000019054	Fis1	-0.269014	0.0270561	No_Change
ENSMUSG00000019055	Plod1	-0.375842	0.000432975	No_Change
ENSMUSG00000019066	Rab3d	1.38636	1.30281e-26	KO_up
ENSMUSG00000019080	Mfsd3	0.310242	0.435922	No_Change
ENSMUSG00000019082	Slc25a22	-0.306893	0.0681097	No_Change
ENSMUSG00000019087	Atp6ap1	0.410778	3.25567e-13	No_Change
ENSMUSG00000019088	Dnase1l1	1.31139	0.000111042	KO_up
ENSMUSG00000019102	Aldh3a1	-3.02501	4.54388e-06	KO_down
ENSMUSG00000019124	Scrn1	-0.712692	0.000126518	No_Change
ENSMUSG00000019132	BC005537	0.150087	0.00876544	No_Change
ENSMUSG00000019139	Isyna1	-0.473306	9.41651e-13	No_Change
ENSMUSG00000019143	Hars2	0.206189	0.284194	No_Change
ENSMUSG00000019146	Cacng2	0.0352895	NA	No_Change
ENSMUSG00000019158	Tmem160	-0.269174	0.0780345	No_Change
ENSMUSG00000019173	Rab5c	0.031124	0.697426	No_Change
ENSMUSG00000019178	Styxl1	0.285698	0.110817	No_Change
ENSMUSG00000019179	Mdh2	0.124643	0.00225724	No_Change
ENSMUSG00000019188	H13	0.910571	2.84791e-10	No_Change
ENSMUSG00000019189	Rnf145	0.0371939	0.776366	No_Change
ENSMUSG00000019194	Scn1b	-0.65338	0.0010697	No_Change
ENSMUSG00000019210	Atp6v1e1	0.140786	0.0776624	No_Change
ENSMUSG00000019214	Chtf18	-0.592383	7.57328e-13	No_Change
ENSMUSG00000019230	Lhx9	-2.2616	0.0229077	KO_down
ENSMUSG00000019232	Etnppl	0.0431387	NA	No_Change
ENSMUSG00000019235	Rps6kl1	-0.267726	0.435971	No_Change
ENSMUSG00000019254	Ppp1r12c	0.0812596	0.360168	No_Change
ENSMUSG00000019256	Ahr	-0.14013	0.49221	No_Change
ENSMUSG00000019261	Map1s	0.200999	0.0668575	No_Change
ENSMUSG00000019278	Dpep1	0.794083	0.108037	No_Change
ENSMUSG00000019295	Tmem129	0.68535	2.00151e-05	No_Change
ENSMUSG00000019297	Nop9	-0.0814956	0.485397	No_Change
ENSMUSG00000019301	Hsd17b1	-0.181934	0.333587	No_Change
ENSMUSG00000019302	Atp6v0a1	-0.262245	0.00969573	No_Change
ENSMUSG00000019303	Psmc3ip	-0.853576	2.22164e-05	No_Change
ENSMUSG00000019312	Grb7	1.93304	4.49228e-38	KO_up
ENSMUSG00000019320	Noxo1	0.0773332	0.86215	No_Change
ENSMUSG00000019326	Aoc3	-1.84263	1.36889e-05	KO_down
ENSMUSG00000019338	Zfp687	0.639967	1.2147e-16	No_Change
ENSMUSG00000019359	Gdpd2	2.58439	3.91685e-31	KO_up
ENSMUSG00000019362	D8Ertd738e	-0.130171	0.319951	No_Change
ENSMUSG00000019368	Sec14l4	0.465811	0.288894	No_Change
ENSMUSG00000019370	Calm3	-0.19894	2.56286e-05	No_Change
ENSMUSG00000019373	Cops3	-0.0114212	0.92454	No_Change
ENSMUSG00000019428	Fkbp8	-0.156098	0.0090369	No_Change
ENSMUSG00000019429	Ffar3	-0.685529	0.149265	No_Change
ENSMUSG00000019432	Ddx39b	-0.445048	5.2969e-17	No_Change
ENSMUSG00000019433	Gipc1	0.65484	3.75768e-22	No_Change
ENSMUSG00000019437	Tlcd1	0.160278	0.535328	No_Change
ENSMUSG00000019461	Plscr3	-0.30991	0.13389	No_Change
ENSMUSG00000019464	Ptger1	0.512081	0.245916	No_Change
ENSMUSG00000019467	Arhgef25	-0.585984	4.47615e-05	No_Change
ENSMUSG00000019470	Xab2	0.0107365	0.914412	No_Change
ENSMUSG00000019471	Cdc37	-0.12128	0.00745568	No_Change
ENSMUSG00000019478	Rab4a	-0.10752	0.41521	No_Change
ENSMUSG00000019487	Trip10	-0.0183396	0.899049	No_Change
ENSMUSG00000019494	Cops6	-0.18657	0.0172732	No_Change
ENSMUSG00000019505	Ubb	-0.060989	0.0774612	No_Change
ENSMUSG00000019518	Ap4m1	0.165689	0.387567	No_Change
ENSMUSG00000019528	Gyg	0.87006	2.38469e-11	No_Change
ENSMUSG00000019539	Rcn3	-1.81344	6.32615e-62	KO_down
ENSMUSG00000019558	Slc6a8	0.590835	8.38418e-31	No_Change
ENSMUSG00000019564	Arid3a	1.48671	6.78298e-85	KO_up
ENSMUSG00000019577	Pdk4	-1.09817	1.43533e-11	KO_down
ENSMUSG00000019578	Ubxn6	-0.153972	0.23798	No_Change
ENSMUSG00000019579	Mydgf	-0.0981274	0.489474	No_Change
ENSMUSG00000019590	Cyb561	-0.203846	0.285311	No_Change
ENSMUSG00000019647	Sema6a	-2.0814	3.48346e-07	KO_down
ENSMUSG00000019659	Ccdc12	-0.345782	0.022675	No_Change
ENSMUSG00000019689	Fmc1	-0.357578	0.24763	No_Change
ENSMUSG00000019699	Akt3	0.0129063	0.955279	No_Change
ENSMUSG00000019710	Mrpl24	-0.441656	9.63369e-09	No_Change
ENSMUSG00000019715	Gle1	-0.0287249	0.803866	No_Change
ENSMUSG00000019718	L3hypdh	-0.384438	0.341762	No_Change
ENSMUSG00000019726	Lyst	0.537105	3.2179e-06	No_Change
ENSMUSG00000019731	Slc35e1	0.141059	0.124421	No_Change
ENSMUSG00000019732	Calr3	-0.158428	0.725163	No_Change
ENSMUSG00000019734	Tmc4	2.31893	7.68358e-30	KO_up
ENSMUSG00000019737	Syne4	0.453961	0.00268844	No_Change
ENSMUSG00000019738	Polr2i	-0.628723	4.53048e-07	No_Change
ENSMUSG00000019761	Krt10	-1.58652	0.012086	KO_down
ENSMUSG00000019763	Rmnd1	0.160828	0.276394	No_Change
[truncated: 20,213 more rows]

## Sheet: 4E-NanogcKO_WithDox_vs_NoDox
ensembl_gene_id	external_gene_name	logFC	FDR	status
ENSMUSG00000000001	Gnai3	-0.0215328	0.870709	No_Change
ENSMUSG00000000028	Cdc45	-0.372211	8.75454e-05	No_Change
ENSMUSG00000000031	H19	5.23868	0	KO_up
ENSMUSG00000000037	Scml2	0.275568	0.133598	No_Change
ENSMUSG00000000056	Narf	-0.236644	0.122117	No_Change
ENSMUSG00000000058	Cav2	-0.0272875	NA	No_Change
ENSMUSG00000000078	Klf6	0.587239	2.04668e-08	No_Change
ENSMUSG00000000085	Scmh1	-0.220585	0.188265	No_Change
ENSMUSG00000000088	Cox5a	-0.640479	6.49103e-24	No_Change
ENSMUSG00000000093	Tbx2	-0.11154	0.385271	No_Change
ENSMUSG00000000094	Tbx4	-0.071921	0.709577	No_Change
ENSMUSG00000000103	Zfy2	0.140638	0.387895	No_Change
ENSMUSG00000000120	Ngfr	-1.44904	9.21842e-12	KO_down
ENSMUSG00000000125	Wnt3	-0.0483291	0.685925	No_Change
ENSMUSG00000000126	Wnt9a	-0.0121595	0.964211	No_Change
ENSMUSG00000000127	Fer	0.280015	0.0938647	No_Change
ENSMUSG00000000131	Xpo6	-0.045229	0.717289	No_Change
ENSMUSG00000000134	Tfe3	0.390826	0.000184093	No_Change
ENSMUSG00000000142	Axin2	-0.933839	0.0030714	No_Change
ENSMUSG00000000148	Brat1	-0.0425134	0.852226	No_Change
ENSMUSG00000000149	Gna12	-0.222151	0.0713241	No_Change
ENSMUSG00000000154	Slc22a18	-0.30706	0.200924	No_Change
ENSMUSG00000000159	Igsf5	0.0065179	NA	No_Change
ENSMUSG00000000167	Pih1d2	0.0334517	NA	No_Change
ENSMUSG00000000168	Dlat	-0.0275988	0.862844	No_Change
ENSMUSG00000000171	Sdhd	-0.24593	0.0144651	No_Change
ENSMUSG00000000182	Fgf23	0.0108068	NA	No_Change
ENSMUSG00000000184	Ccnd2	0.0854663	0.633592	No_Change
ENSMUSG00000000194	Gpr107	0.0360142	0.86757	No_Change
ENSMUSG00000000197	Nalcn	0.122379	0.378039	No_Change
ENSMUSG00000000202	Btbd17	-0.0349166	NA	No_Change
ENSMUSG00000000204	Slfn4	0.00379214	NA	No_Change
ENSMUSG00000000214	Th	0.00768115	NA	No_Change
ENSMUSG00000000216	Scnn1g	0.00725035	NA	No_Change
ENSMUSG00000000223	Drp2	0.0784105	0.720094	No_Change
ENSMUSG00000000244	Tspan32	0.000714484	NA	No_Change
ENSMUSG00000000247	Lhx2	0.26438	0.253096	No_Change
ENSMUSG00000000248	Clec2g	0.0988882	NA	No_Change
ENSMUSG00000000253	Gmpr	-0.057093	0.825602	No_Change
ENSMUSG00000000266	Mid2	-0.00395757	0.986556	No_Change
ENSMUSG00000000275	Trim25	-0.557419	1.46443e-13	No_Change
ENSMUSG00000000276	Dgke	-0.795449	1.93099e-08	No_Change
ENSMUSG00000000278	Scpep1	-0.247923	4.82713e-06	No_Change
ENSMUSG00000000282	Mnt	0.319726	0.014688	No_Change
ENSMUSG00000000290	Itgb2	0.00432137	NA	No_Change
ENSMUSG00000000295	Hddc2	0.187368	0.308013	No_Change
ENSMUSG00000000296	Tpd52l1	0.577932	0.00485679	No_Change
ENSMUSG00000000301	Pemt	0.0244664	0.915159	No_Change
ENSMUSG00000000303	Cdh1	-0.782986	9.44446e-83	No_Change
ENSMUSG00000000305	Cdh4	-0.0344619	0.84716	No_Change
ENSMUSG00000000308	Ckmt1	-0.0910543	0.668436	No_Change
ENSMUSG00000000317	Bcl6b	-0.265681	0.230582	No_Change
ENSMUSG00000000318	Clec10a	0.0120514	NA	No_Change
ENSMUSG00000000320	Alox12	0.0521915	0.816423	No_Change
ENSMUSG00000000325	NA	-0.560104	4.7263e-15	No_Change
ENSMUSG00000000326	Comt	0.176212	0.341446	No_Change
ENSMUSG00000000339	Rtca	-0.159071	0.320035	No_Change
ENSMUSG00000000340	Dbt	-0.26555	0.0808316	No_Change
ENSMUSG00000000346	Dazap2	-0.186073	0.038969	No_Change
ENSMUSG00000000355	Mcts1	0.23263	0.310475	No_Change
ENSMUSG00000000359	Rem1	0.0128136	NA	No_Change
ENSMUSG00000000365	Rnf17	0.823459	1.41059e-12	No_Change
ENSMUSG00000000374	Trappc10	-0.13364	0.348752	No_Change
ENSMUSG00000000378	Ccm2	0.0116889	0.959077	No_Change
ENSMUSG00000000384	Tbrg4	-0.0597247	0.670976	No_Change
ENSMUSG00000000385	Tmprss2	1.87851	0.00372228	KO_up
ENSMUSG00000000386	Mx1	-0.000808026	NA	No_Change
ENSMUSG00000000399	Ndufa9	0.0907627	0.399192	No_Change
ENSMUSG00000000402	Egfl6	0.029566	0.866942	No_Change
ENSMUSG00000000409	Lck	0.420675	0.0666095	No_Change
ENSMUSG00000000411	Tssk3	0.0186679	NA	No_Change
ENSMUSG00000000416	Cttnbp2	0.0389723	0.84105	No_Change
ENSMUSG00000000420	Galnt1	0.350442	0.0015389	No_Change
ENSMUSG00000000435	Myf5	-0.0010111	NA	No_Change
ENSMUSG00000000439	Mkrn2	-0.142872	0.218163	No_Change
ENSMUSG00000000440	Pparg	0.0561073	NA	No_Change
ENSMUSG00000000441	Raf1	-0.0823174	0.393375	No_Change
ENSMUSG00000000486	Septin1	-0.796817	2.01191e-08	No_Change
ENSMUSG00000000489	Pdgfb	0.0784732	0.73945	No_Change
ENSMUSG00000000530	Acvrl1	-0.255891	0.232317	No_Change
ENSMUSG00000000531	Tamalin	-0.482139	9.55456e-05	No_Change
ENSMUSG00000000532	Acvr1b	0.0678542	0.686688	No_Change
ENSMUSG00000000538	Tom1l2	-0.141019	0.529957	No_Change
ENSMUSG00000000544	Gpa33	-0.535457	0.0013389	No_Change
ENSMUSG00000000552	Zfp385a	-0.538918	4.15824e-08	No_Change
ENSMUSG00000000555	Itga5	0.458821	3.32158e-06	No_Change
ENSMUSG00000000561	Wdr77	-0.0519068	0.65223	No_Change
ENSMUSG00000000563	Atp5pb	0.0225892	0.804118	No_Change
ENSMUSG00000000567	Sox9	-0.164728	0.399653	No_Change
ENSMUSG00000000568	Hnrnpd	0.423442	8.22477e-13	No_Change
ENSMUSG00000000579	Dynlt1c	-0.0125231	NA	No_Change
ENSMUSG00000000581	C1d	0.0309141	0.902014	No_Change
ENSMUSG00000000594	Gm2a	0.073301	0.580757	No_Change
ENSMUSG00000000600	Krit1	0.22834	0.155084	No_Change
ENSMUSG00000000605	Clcn4	0.559826	0.0293483	No_Change
ENSMUSG00000000617	Grm6	0.0113157	NA	No_Change
ENSMUSG00000000627	Sema4f	-0.0160459	0.954145	No_Change
ENSMUSG00000000628	Hk2	-0.222432	1.87363e-05	No_Change
ENSMUSG00000000631	Myo18a	6.26425e-05	0.999981	No_Change
ENSMUSG00000000632	Sez6	1.03757	0.000639224	KO_up
ENSMUSG00000000673	Haao	-0.00469379	NA	No_Change
ENSMUSG00000000682	Cd52	-0.00791291	NA	No_Change
ENSMUSG00000000686	Abhd15	0.0875073	0.547775	No_Change
ENSMUSG00000000690	Hoxb6	-0.0214759	NA	No_Change
ENSMUSG00000000693	Loxl3	0.0112255	NA	No_Change
ENSMUSG00000000706	Btn1a1	0.153599	0.247274	No_Change
ENSMUSG00000000708	Kat2b	0.583514	4.20048e-05	No_Change
ENSMUSG00000000711	Rab5b	-0.240239	0.0316303	No_Change
ENSMUSG00000000730	Dnmt3l	-0.778732	1.59091e-07	No_Change
ENSMUSG00000000731	Aire	-1.39222	1.67752e-06	KO_down
ENSMUSG00000000732	Icosl	-0.447251	0.0615752	No_Change
ENSMUSG00000000738	Spg7	0.352308	0.00437399	No_Change
ENSMUSG00000000739	Sult5a1	-0.0116955	0.962732	No_Change
ENSMUSG00000000740	Rpl13	-0.187914	3.86278e-06	No_Change
ENSMUSG00000000743	Chmp1a	-0.0720228	0.547534	No_Change
ENSMUSG00000000751	Rpa1	-0.25843	4.92251e-07	No_Change
ENSMUSG00000000753	Serpinf1	-0.018189	NA	No_Change
ENSMUSG00000000759	Tubgcp3	0.0295989	0.862428	No_Change
ENSMUSG00000000776	Polr3d	-0.0310008	0.882282	No_Change
ENSMUSG00000000782	Tcf7	-0.707253	1.68911e-11	No_Change
ENSMUSG00000000787	Ddx3x	0.00594053	0.943591	No_Change
ENSMUSG00000000791	Il12rb1	-0.3995	0.12894	No_Change
ENSMUSG00000000792	Slc5a5	-0.407044	0.0948229	No_Change
ENSMUSG00000000794	Kcnn3	0.0606057	0.697003	No_Change
ENSMUSG00000000804	Usp32	0.255592	0.0168048	No_Change
ENSMUSG00000000805	Car4	1.89083	0.00119682	KO_up
ENSMUSG00000000811	Txnrd3	0.179616	0.395284	No_Change
ENSMUSG00000000823	Zfp512b	0.438182	0.00121438	No_Change
ENSMUSG00000000826	Dnajc5	-0.122488	0.366877	No_Change
ENSMUSG00000000827	Tpd52l2	-0.123382	0.30632	No_Change
ENSMUSG00000000838	Fmr1	0.0677258	0.624071	No_Change
ENSMUSG00000000861	Bcl11a	-0.0527213	0.778077	No_Change
ENSMUSG00000000876	Pxmp4	0.0109398	0.973144	No_Change
ENSMUSG00000000881	Dlg3	0.00576524	0.979994	No_Change
ENSMUSG00000000884	Gnb1l	-0.105626	0.650831	No_Change
ENSMUSG00000000901	Mmp11	-0.240228	0.0536523	No_Change
ENSMUSG00000000902	Smarcb1	0.287006	0.0311452	No_Change
ENSMUSG00000000903	Vpreb3	-0.108384	NA	No_Change
ENSMUSG00000000915	Hip1r	-0.957422	1.67204e-13	No_Change
ENSMUSG00000000916	Nsun5	-0.109579	0.611583	No_Change
ENSMUSG00000000934	Top1mt	-0.0692163	0.764897	No_Change
ENSMUSG00000000938	Hoxa10	-0.0662358	0.707203	No_Change
ENSMUSG00000000942	Hoxa4	0.0987008	0.405343	No_Change
ENSMUSG00000000948	Gm38393	0.0692351	0.645192	No_Change
ENSMUSG00000000957	Mmp14	-0.114171	0.629882	No_Change
ENSMUSG00000000958	Slc7a7	-0.442587	0.0360345	No_Change
ENSMUSG00000000959	Oxa1l	-0.113664	0.35649	No_Change
ENSMUSG00000000976	Heatr6	0.0272758	0.894635	No_Change
ENSMUSG00000000982	Ccl3	0.00901924	NA	No_Change
ENSMUSG00000001014	Icam4	-0.0258077	NA	No_Change
ENSMUSG00000001016	Ilf2	-0.0810482	0.357052	No_Change
ENSMUSG00000001017	Chtop	-0.0131781	0.922788	No_Change
ENSMUSG00000001018	Snapin	0.152116	0.337497	No_Change
ENSMUSG00000001020	S100a4	0.00725035	NA	No_Change
ENSMUSG00000001021	S100a3	-0.00793017	NA	No_Change
ENSMUSG00000001025	S100a6	0.372013	0.0938647	No_Change
ENSMUSG00000001027	Scn4a	-0.0201044	NA	No_Change
ENSMUSG00000001029	Icam2	0.00725035	NA	No_Change
ENSMUSG00000001034	Mapk7	-0.092027	0.557619	No_Change
ENSMUSG00000001036	Epn2	-0.265614	0.00724033	No_Change
ENSMUSG00000001039	B9d1	0.216249	0.330402	No_Change
ENSMUSG00000001052	Sec24b	-0.0298634	0.863791	No_Change
ENSMUSG00000001053	N4bp3	-0.890302	0.000195389	No_Change
ENSMUSG00000001054	Rmnd5b	-0.610625	0.00120635	No_Change
ENSMUSG00000001056	Nhp2	0.0925677	0.387622	No_Change
ENSMUSG00000001062	Vps9d1	0.28766	0.15003	No_Change
ENSMUSG00000001065	Zfp276	0.150181	0.517504	No_Change
ENSMUSG00000001076	C1ql4	-0.390515	0.133293	No_Change
ENSMUSG00000001082	Mfsd10	-0.0834342	0.608025	No_Change
ENSMUSG00000001089	Luzp1	0.0137882	0.915148	No_Change
ENSMUSG00000001095	Slc13a2	0.0234131	NA	No_Change
ENSMUSG00000001098	Kctd10	-0.159416	0.308614	No_Change
ENSMUSG00000001100	Poldip2	-0.0258497	0.876686	No_Change
ENSMUSG00000001103	Sebox	-0.00793017	NA	No_Change
ENSMUSG00000001105	Ift20	-0.405798	0.047263	No_Change
ENSMUSG00000001119	Col6a1	0.0694975	NA	No_Change
ENSMUSG00000001120	Pcbp3	-0.129885	0.455845	No_Change
ENSMUSG00000001123	Lgals9	-0.829389	0.0124725	No_Change
ENSMUSG00000001127	Araf	0.138115	0.295311	No_Change
ENSMUSG00000001128	Cfp	-0.114608	0.61318	No_Change
ENSMUSG00000001131	Timp1	-0.368977	0.050683	No_Change
ENSMUSG00000001134	Uxt	0.0474084	0.85772	No_Change
ENSMUSG00000001138	Cnnm3	-0.0453203	0.827308	No_Change
ENSMUSG00000001143	Lman2l	0.11559	0.568934	No_Change
ENSMUSG00000001150	Mcm3ap	-0.240868	0.00587477	No_Change
ENSMUSG00000001151	Pcnt	-0.105402	0.244812	No_Change
ENSMUSG00000001155	Ftcd	-0.00723061	NA	No_Change
ENSMUSG00000001156	Mxd1	-0.16706	0.462865	No_Change
ENSMUSG00000001157	Gmcl1	-0.0157993	0.944784	No_Change
ENSMUSG00000001158	Snrnp27	0.0486213	0.773823	No_Change
ENSMUSG00000001166	Oas1c	0.216877	0.346754	No_Change
ENSMUSG00000001168	Oas1h	0.02231	NA	No_Change
ENSMUSG00000001173	Ocrl	0.136179	0.35774	No_Change
ENSMUSG00000001175	Calm1	0.100128	0.15012	No_Change
ENSMUSG00000001211	Agpat3	-1.47883	1.14874e-18	KO_down
ENSMUSG00000001227	Sema6b	-0.9355	0.000607658	No_Change
ENSMUSG00000001228	Uhrf1	-0.319887	3.38226e-11	No_Change
ENSMUSG00000001229	Dpp9	0.108736	0.533768	No_Change
ENSMUSG00000001240	Ramp2	0.0156391	0.917457	No_Change
ENSMUSG00000001247	Lsr	-0.18274	0.256061	No_Change
ENSMUSG00000001248	Gramd1a	0.190891	0.114649	No_Change
ENSMUSG00000001249	Hpn	-0.0850628	0.671696	No_Change
ENSMUSG00000001260	Gabrg1	-0.000808026	NA	No_Change
ENSMUSG00000001270	Ckb	-0.811498	1.8508e-38	No_Change
ENSMUSG00000001280	Sp1	-0.23864	1.84487e-05	No_Change
ENSMUSG00000001281	Itgb7	-1.02461	1.26164e-05	KO_down
ENSMUSG00000001285	Myg1	-0.0958528	0.638422	No_Change
ENSMUSG00000001288	Rarg	-0.427827	0.000753163	No_Change
ENSMUSG00000001289	Pfdn5	0.0151991	0.929163	No_Change
ENSMUSG00000001300	Efnb2	0.0444198	0.861327	No_Change
ENSMUSG00000001305	Rrp15	0.216243	0.099918	No_Change
ENSMUSG00000001313	Rnd2	-0.51495	0.000400263	No_Change
ENSMUSG00000001323	Srr	0.292833	0.223491	No_Change
ENSMUSG00000001333	Sync	0.194474	0.2991	No_Change
ENSMUSG00000001334	Fndc5	0.434422	0.103244	No_Change
ENSMUSG00000001348	Acp5	-0.3258	0.0462189	No_Change
ENSMUSG00000001349	Cnn1	-0.0505179	0.750603	No_Change
ENSMUSG00000001366	Fbxo9	0.109652	0.64159	No_Change
ENSMUSG00000001376	Vps50	0.372664	0.00116129	No_Change
ENSMUSG00000001379	NA	-0.0519666	0.843679	No_Change
ENSMUSG00000001380	Hars	0.0423699	0.755862	No_Change
ENSMUSG00000001383	Zmat2	0.230267	0.0414661	No_Change
ENSMUSG00000001403	Ube2c	-0.211239	0.0155201	No_Change
ENSMUSG00000001415	Smg5	-0.0647192	0.494511	No_Change
ENSMUSG00000001416	Cct3	-0.0686402	0.241735	No_Change
ENSMUSG00000001417	NA	0.0642658	0.62579	No_Change
ENSMUSG00000001418	Glmp	0.117295	0.393654	No_Change
ENSMUSG00000001419	Mef2d	-0.155896	0.08543	No_Change
ENSMUSG00000001420	Tmem79	0.0347248	0.863233	No_Change
ENSMUSG00000001424	Snd1	0.0359293	0.682611	No_Change
ENSMUSG00000001435	Col18a1	-0.428364	2.93731e-06	No_Change
ENSMUSG00000001436	Slc19a1	-0.00469342	0.986558	No_Change
ENSMUSG00000001440	Kpnb1	-0.12166	0.00151835	No_Change
ENSMUSG00000001441	Npepps	-0.0435277	0.562623	No_Change
ENSMUSG00000001444	Tbx21	0.0318691	0.864835	No_Change
ENSMUSG00000001445	Mrpl10	-0.10889	0.435831	No_Change
ENSMUSG00000001467	Cyp51	-0.36879	2.6324e-05	No_Change
ENSMUSG00000001472	Tcf25	0.0582654	0.514962	No_Change
ENSMUSG00000001473	Tubb6	-0.141672	0.195892	No_Change
ENSMUSG00000001482	Def8	-0.214021	0.0590081	No_Change
ENSMUSG00000001494	Sost	-0.000808026	NA	No_Change
ENSMUSG00000001496	Nkx2-1	0.0321796	NA	No_Change
ENSMUSG00000001497	Pax9	-0.101075	0.619571	No_Change
ENSMUSG00000001504	Irx2	0.044848	NA	No_Change
ENSMUSG00000001506	Col1a1	-0.0218789	0.931293	No_Change
ENSMUSG00000001507	Itga3	-0.758548	9.27105e-16	No_Change
ENSMUSG00000001508	Sgca	-0.0185064	NA	No_Change
ENSMUSG00000001510	Dlx3	-0.0657069	0.783744	No_Change
ENSMUSG00000001517	Foxm1	0.550705	6.2369e-07	No_Change
ENSMUSG00000001518	Itfg2	0.0264859	0.902964	No_Change
ENSMUSG00000001520	Nrip2	0.00545134	NA	No_Change
ENSMUSG00000001521	Tulp3	-0.125278	0.245581	No_Change
ENSMUSG00000001524	Gtf2h4	0.2007	0.24139	No_Change
ENSMUSG00000001525	Tubb5	-0.127952	0.000295173	No_Change
ENSMUSG00000001542	Ell2	-0.172817	0.286993	No_Change
ENSMUSG00000001552	Jup	-0.821589	5.79838e-12	No_Change
ENSMUSG00000001555	Fkbp10	-0.545606	0.0748564	No_Change
ENSMUSG00000001558	Klhl10	0.0789643	NA	No_Change
ENSMUSG00000001566	Mnx1	0.236447	0.281702	No_Change
ENSMUSG00000001569	Nom1	-0.0900322	0.614335	No_Change
ENSMUSG00000001576	Ergic1	-0.566394	2.70578e-10	No_Change
ENSMUSG00000001583	Tnk1	-0.254351	0.266978	No_Change
ENSMUSG00000001588	Acap1	-1.08694	0.00191519	KO_down
ENSMUSG00000001604	Tcea3	-0.559383	4.83478e-06	No_Change
ENSMUSG00000001622	Csn3	-0.0105975	NA	No_Change
ENSMUSG00000001627	Ifrd1	-0.00673277	0.970052	No_Change
ENSMUSG00000001630	Stk38l	-0.136762	0.390956	No_Change
ENSMUSG00000001632	Brpf1	-0.216436	0.0401455	No_Change
ENSMUSG00000001642	Akr1b3	-0.302439	0.00233834	No_Change
ENSMUSG00000001655	Hoxc13	0.115363	0.613668	No_Change
ENSMUSG00000001656	Hoxc11	-0.00799816	NA	No_Change
ENSMUSG00000001657	Hoxc8	0.0234792	NA	No_Change
ENSMUSG00000001661	Hoxc6	0.033448	NA	No_Change
ENSMUSG00000001663	Gstt1	0.118208	0.603928	No_Change
ENSMUSG00000001665	Gstt3	-0.121516	0.585223	No_Change
ENSMUSG00000001666	Ddt	-0.117024	0.531421	No_Change
ENSMUSG00000001670	Tat	0.0451675	NA	No_Change
ENSMUSG00000001672	Marveld3	0.400861	0.120302	No_Change
ENSMUSG00000001674	Ddx18	-0.0487351	0.728819	No_Change
ENSMUSG00000001687	Ubl3	0.0339633	0.873741	No_Change
ENSMUSG00000001700	Gramd3	0.566647	0.0287272	No_Change
ENSMUSG00000001707	Eef1e1	-0.0759872	0.630309	No_Change
ENSMUSG00000001729	Akt1	-0.0166179	0.930853	No_Change
ENSMUSG00000001739	Cldn15	-0.0141722	NA	No_Change
ENSMUSG00000001741	Il16	0.0176958	NA	No_Change
ENSMUSG00000001750	Tcirg1	-0.400383	0.00919705	No_Change
ENSMUSG00000001751	Naglu	0.10768	0.620784	No_Change
ENSMUSG00000001755	Coasy	0.251021	0.120967	No_Change
ENSMUSG00000001761	Smo	0.177483	0.27834	No_Change
ENSMUSG00000001763	Tspan33	-0.338521	0.170393	No_Change
ENSMUSG00000001767	Crnkl1	-0.153723	0.29185	No_Change
ENSMUSG00000001768	Rin2	0.0294019	0.916968	No_Change
ENSMUSG00000001774	Chordc1	0.137472	0.329798	No_Change
ENSMUSG00000001783	Rtcb	0.156121	0.0619263	No_Change
ENSMUSG00000001785	Pwp1	-0.113825	0.334239	No_Change
ENSMUSG00000001786	Fbxo7	-0.312428	0.0687208	No_Change
ENSMUSG00000001794	Capns1	-0.637292	4.87081e-34	No_Change
ENSMUSG00000001802	Lrp3	-0.0153904	0.956012	No_Change
ENSMUSG00000001819	Hoxd13	0.0331403	0.897554	No_Change
ENSMUSG00000001827	Folr1	-0.345419	0.0944333	No_Change
ENSMUSG00000001829	Clpb	-0.0301498	0.836351	No_Change
ENSMUSG00000001833	Septin7	0.173914	0.0527608	No_Change
ENSMUSG00000001844	Zdhhc4	0.346297	0.111051	No_Change
ENSMUSG00000001847	Rac1	0.0759158	0.512455	No_Change
ENSMUSG00000001855	Nup214	-0.0605539	0.584136	No_Change
ENSMUSG00000001864	Aif1l	-0.577019	0.0088946	No_Change
ENSMUSG00000001870	Ltbp1	-0.634034	0.000914005	No_Change
ENSMUSG00000001891	Ugp2	0.219199	0.18663	No_Change
ENSMUSG00000001901	Kcnh6	0.116426	0.558614	No_Change
ENSMUSG00000001909	Trmt1	0.163025	0.0845776	No_Change
ENSMUSG00000001910	Nacc1	0.0485682	0.507762	No_Change
ENSMUSG00000001911	Nfix	1.18286	1.82294e-05	KO_up
ENSMUSG00000001918	Slc1a5	-0.051482	0.688945	No_Change
ENSMUSG00000001924	Uba1	-0.147895	0.000571235	No_Change
ENSMUSG00000001930	Vwf	0.0709477	0.780532	No_Change
ENSMUSG00000001942	Siae	-0.00183715	0.994369	No_Change
ENSMUSG00000001943	Vsig2	-0.0535115	0.646574	No_Change
ENSMUSG00000001946	Esam	-0.0894216	0.631639	No_Change
ENSMUSG00000001948	Spa17	0.0627797	0.660937	No_Change
ENSMUSG00000001962	Fam50a	0.228078	0.0739892	No_Change
ENSMUSG00000001964	Emd	-0.255585	0.0266974	No_Change
ENSMUSG00000001983	Taco1	0.416599	0.120303	No_Change
ENSMUSG00000001985	Grik3	0.833237	2.33642e-06	No_Change
ENSMUSG00000001986	Gria3	-0.0263446	0.870939	No_Change
ENSMUSG00000001988	Npas1	-0.0623794	0.61318	No_Change
ENSMUSG00000001995	Sipa1l2	-0.586376	2.97758e-19	No_Change
ENSMUSG00000001998	Ap4e1	0.353702	0.0289031	No_Change
ENSMUSG00000001999	Blvra	0.151267	0.514677	No_Change
ENSMUSG00000002006	Pdzd4	-0.319549	0.109256	No_Change
ENSMUSG00000002007	Srpk3	-0.0147124	NA	No_Change
ENSMUSG00000002010	Idh3g	-0.00144874	0.992776	No_Change
ENSMUSG00000002012	Pnck	-0.0198315	0.941453	No_Change
ENSMUSG00000002014	Ssr4	-0.146863	0.346283	No_Change
ENSMUSG00000002015	Bcap31	-0.512403	4.0834e-06	No_Change
ENSMUSG00000002017	Fam98a	-0.125707	0.432138	No_Change
ENSMUSG00000002020	Ltbp2	0.606083	0.0630319	No_Change
ENSMUSG00000002028	Kmt2a	0.132526	0.170458	No_Change
ENSMUSG00000002031	Ift46	0.17727	0.257911	No_Change
ENSMUSG00000002032	Tmem25	-0.219212	0.299558	No_Change
ENSMUSG00000002043	Trappc6a	-0.174823	0.395284	No_Change
ENSMUSG00000002052	Supt6	-0.179229	0.0190436	No_Change
ENSMUSG00000002055	Spag5	0.0763723	0.536239	No_Change
ENSMUSG00000002057	Foxn1	-0.00799816	NA	No_Change
ENSMUSG00000002058	Unc119	-0.532017	0.000136147	No_Change
ENSMUSG00000002059	Rab34	0.0476228	0.859492	No_Change
ENSMUSG00000002064	Sdf2	0.0456762	0.845758	No_Change
ENSMUSG00000002068	Ccne1	-0.166578	0.142751	No_Change
ENSMUSG00000002076	Hsf2bp	-0.058116	0.737469	No_Change
ENSMUSG00000002083	Bbc3	-0.342942	0.0155933	No_Change
ENSMUSG00000002100	Mybpc3	0.0619043	NA	No_Change
ENSMUSG00000002102	Psmc3	0.146061	0.0676345	No_Change
ENSMUSG00000002103	Acp2	1.00522	0.000632718	KO_up
ENSMUSG00000002104	Rapsn	-0.00192192	NA	No_Change
ENSMUSG00000002105	Slc39a13	0.202328	0.365872	No_Change
ENSMUSG00000002107	Celf2	-0.0366086	0.886995	No_Change
ENSMUSG00000002108	Nr1h3	0.0885305	NA	No_Change
ENSMUSG00000002109	Ddb2	0.155157	0.454227	No_Change
ENSMUSG00000002111	Spi1	0.0323954	NA	No_Change
ENSMUSG00000002129	Sf3a1	-0.0624292	0.459371	No_Change
ENSMUSG00000002147	Stat6	-0.169474	0.362863	No_Change
ENSMUSG00000002190	Clgn	-0.437415	0.0597183	No_Change
ENSMUSG00000002204	Napsa	0.0224068	NA	No_Change
ENSMUSG00000002205	Vrk3	0.0228494	0.914875	No_Change
ENSMUSG00000002210	Smg9	-0.118719	0.494332	No_Change
ENSMUSG00000002221	Paxip1	-0.214794	0.028136	No_Change
ENSMUSG00000002222	Rmnd5a	-0.0109927	0.935115	No_Change
ENSMUSG00000002227	Mov10	-0.470556	1.13685e-11	No_Change
ENSMUSG00000002228	Ppm1j	-0.589833	0.000401639	No_Change
ENSMUSG00000002233	Rhoc	-0.107876	0.467599	No_Change
ENSMUSG00000002240	Prr27	-0.00793017	NA	No_Change
ENSMUSG00000002249	Tead3	0.270325	0.197645	No_Change
ENSMUSG00000002250	Ppard	-0.0455654	0.809449	No_Change
ENSMUSG00000002257	Def6	-0.408475	0.0270419	No_Change
ENSMUSG00000002265	Peg3	0.0950093	0.496881	No_Change
ENSMUSG00000002266	Zim1	0.165868	0.350995	No_Change
ENSMUSG00000002274	Metrn	-0.323977	0.171848	No_Change
ENSMUSG00000002279	Lmf1	-0.0159008	0.954333	No_Change
ENSMUSG00000002280	Ciao3	0.0409549	0.876686	No_Change
ENSMUSG00000002289	Angptl4	0.137684	0.550101	No_Change
ENSMUSG00000002290	NA	-0.0435854	NA	No_Change
ENSMUSG00000002297	Dbf4	0.5883	2.31583e-10	No_Change
ENSMUSG00000002307	Daxx	-0.16078	0.197008	No_Change
ENSMUSG00000002308	Cd320	-0.143457	0.441932	No_Change
ENSMUSG00000002319	Ipo4	0.0986177	0.381867	No_Change
ENSMUSG00000002320	Tm9sf1	0.0121243	0.960731	No_Change
ENSMUSG00000002324	Rec8	1.12156	1.79097e-33	KO_up
ENSMUSG00000002325	Irf9	0.154583	0.490199	No_Change
ENSMUSG00000002326	Gmpr2	0.121017	0.581395	No_Change
ENSMUSG00000002329	Mdp1	-0.110293	0.549453	No_Change
ENSMUSG00000002332	Dhrs1	-0.107587	0.599375	No_Change
ENSMUSG00000002341	Ncan	-1.14671	0.000101951	KO_down
ENSMUSG00000002342	Tmem161a	-0.505294	5.38003e-06	No_Change
ENSMUSG00000002343	Armc6	0.647126	0.0010953	No_Change
ENSMUSG00000002345	Borcs8	-0.0543503	0.835741	No_Change
ENSMUSG00000002346	Slc25a42	-0.812259	6.19384e-05	No_Change
ENSMUSG00000002365	Snx9	0.341041	0.069711	No_Change
ENSMUSG00000002372	Ranbp3	-0.236347	0.0120511	No_Change
ENSMUSG00000002379	Ndufa11	-0.326439	0.00398493	No_Change
ENSMUSG00000002384	Bmp8b	0.0607446	0.748244	No_Change
ENSMUSG00000002393	Nr2f6	-0.0788462	0.685898	No_Change
ENSMUSG00000002395	Use1	0.348778	0.0159841	No_Change
ENSMUSG00000002396	Ocel1	-0.0251262	0.922711	No_Change
ENSMUSG00000002409	Dyrk1b	0.18388	0.383543	No_Change
ENSMUSG00000002413	Braf	0.237996	0.0427894	No_Change
ENSMUSG00000002416	Ndufb2	-0.0273796	0.909095	No_Change
ENSMUSG00000002428	Hltf	0.216694	0.0310606	No_Change
ENSMUSG00000002455	Prpf6	-0.10843	0.271962	No_Change
ENSMUSG00000002458	Rgs19	-0.147074	0.525727	No_Change
ENSMUSG00000002459	Rgs20	-0.00509869	NA	No_Change
ENSMUSG00000002475	Abhd3	0.190685	0.387232	No_Change
ENSMUSG00000002477	Snrpd1	0.0226199	0.886995	No_Change
ENSMUSG00000002486	Tchp	-0.174734	0.326994	No_Change
ENSMUSG00000002489	Tiam1	0.494282	3.43182e-06	No_Change
ENSMUSG00000002496	Tsc2	0.038571	0.765549	No_Change
ENSMUSG00000002500	Rpl3l	0.0053252	0.981968	No_Change
ENSMUSG00000002504	Slc9a3r2	-0.145278	0.465352	No_Change
ENSMUSG00000002524	Puf60	-0.153449	0.0449862	No_Change
ENSMUSG00000002546	Golga2	-0.134071	0.267385	No_Change
ENSMUSG00000002550	Uck1	-0.504925	5.83209e-05	No_Change
ENSMUSG00000002565	Scin	-0.0267012	NA	No_Change
ENSMUSG00000002578	Ikzf4	0.0119711	0.965031	No_Change
ENSMUSG00000002580	Mien1	-0.236009	0.149596	No_Change
ENSMUSG00000002602	Axl	-0.0457095	0.7943	No_Change
ENSMUSG00000002603	Tgfb1	-0.248618	0.276313	No_Change
ENSMUSG00000002608	Ccdc97	0.108318	0.532213	No_Change
ENSMUSG00000002617	Zfp40	1.07579	0.00755034	KO_up
ENSMUSG00000002625	Akap8l	-0.00489217	0.979223	No_Change
ENSMUSG00000002633	Shh	-0.0155336	NA	No_Change
ENSMUSG00000002635	Pdcd2l	0.0580479	0.76071	No_Change
ENSMUSG00000002658	Gtf2f1	-0.0696903	0.584505	No_Change
ENSMUSG00000002660	Clpp	-0.0701239	0.664512	No_Change
ENSMUSG00000002661	Alkbh7	-0.0309907	0.903976	No_Change
ENSMUSG00000002664	Pspn	0.0113157	NA	No_Change
ENSMUSG00000002668	Dennd1c	-0.579323	0.0585392	No_Change
ENSMUSG00000002679	Med6	0.300661	0.0904326	No_Change
ENSMUSG00000002688	Prkd1	0.0608339	0.804311	No_Change
ENSMUSG00000002718	Cse1l	0.123488	0.0531376	No_Change
ENSMUSG00000002728	Naa20	-0.0383874	0.843679	No_Change
ENSMUSG00000002731	Prkra	0.041182	0.861216	No_Change
ENSMUSG00000002732	Fkbp7	-0.0199445	0.937096	No_Change
ENSMUSG00000002733	Plekha3	0.0644346	0.774103	No_Change
ENSMUSG00000002741	Ykt6	-0.487645	8.3004e-06	No_Change
ENSMUSG00000002748	Baz1b	0.0507258	0.552535	No_Change
ENSMUSG00000002763	Pex6	0.196445	0.305798	No_Change
ENSMUSG00000002767	Mrpl2	0.0591303	0.659694	No_Change
ENSMUSG00000002768	Mea1	-0.294764	0.0366418	No_Change
ENSMUSG00000002769	Gnmt	-0.526075	0.0774212	No_Change
ENSMUSG00000002771	Grin2d	0.00922022	0.962154	No_Change
ENSMUSG00000002778	Kdelr1	0.0409111	0.780017	No_Change
ENSMUSG00000002781	Tmem143	0.129982	0.539616	No_Change
ENSMUSG00000002791	Pdxk-ps	0.00707913	NA	No_Change
ENSMUSG00000002797	Ggct	0.0407806	0.878887	No_Change
ENSMUSG00000002799	Jag2	-0.476897	0.000213075	No_Change
ENSMUSG00000002803	Btbd6	0.221919	0.335869	No_Change
ENSMUSG00000002804	Nudt14	0.0100323	0.973349	No_Change
ENSMUSG00000002808	Epdr1	-0.251256	0.27034	No_Change
ENSMUSG00000002812	Flii	0.145433	0.11278	No_Change
ENSMUSG00000002814	Top3a	-0.160187	0.371563	No_Change
ENSMUSG00000002820	Atg4d	-0.114557	0.472464	No_Change
ENSMUSG00000002825	Qtrt1	0.106965	0.573109	No_Change
ENSMUSG00000002831	Plin4	-0.034716	NA	No_Change
ENSMUSG00000002833	Hdgfl2	-0.196574	0.0134191	No_Change
ENSMUSG00000002835	Chaf1a	-0.173615	0.0569583	No_Change
ENSMUSG00000002844	Adprh	-0.369513	2.94054e-05	No_Change
ENSMUSG00000002845	Tmem39a	-0.425408	4.03864e-06	No_Change
ENSMUSG00000002846	Timmdc1	0.0580251	0.792485	No_Change
ENSMUSG00000002847	Pla1a	-0.426778	0.113047	No_Change
ENSMUSG00000002870	Mcm2	-0.117988	0.0234712	No_Change
ENSMUSG00000002871	Tpra1	-0.230216	0.284291	No_Change
ENSMUSG00000002881	Nab1	0.617808	0.00419563	No_Change
ENSMUSG00000002885	Adgre5	-0.595446	4.31033e-12	No_Change
ENSMUSG00000002897	Il17ra	-0.114112	0.589131	No_Change
ENSMUSG00000002900	Lamb1	-0.0803114	0.534055	No_Change
ENSMUSG00000002908	Kcnn1	-0.0538559	0.83606	No_Change
ENSMUSG00000002910	Arrdc2	-0.858113	1.30384e-09	No_Change
ENSMUSG00000002944	Cd36	0.00796305	NA	No_Change
ENSMUSG00000002948	Map2k7	-0.21701	0.033268	No_Change
ENSMUSG00000002949	Timm44	0.0415562	0.756692	No_Change
ENSMUSG00000002957	Ap2a2	-0.196315	0.00312046	No_Change
ENSMUSG00000002963	Pnkp	-0.290093	0.076671	No_Change
ENSMUSG00000002968	Med25	-0.283394	0.000892664	No_Change
ENSMUSG00000002980	Bcam	-0.480078	1.31797e-05	No_Change
ENSMUSG00000002981	Clptm1	-0.303274	0.000456433	No_Change
ENSMUSG00000002983	Relb	0.0920663	0.689402	No_Change
ENSMUSG00000002984	Tomm40	-0.237219	0.00348303	No_Change
ENSMUSG00000002985	Apoe	0.636446	3.47344e-58	No_Change
ENSMUSG00000002992	Apoc2	0.00805221	NA	No_Change
ENSMUSG00000002996	Hbp1	0.00213768	0.992776	No_Change
ENSMUSG00000002997	Prkar2b	0.871574	0.00182723	No_Change
ENSMUSG00000003031	Cdkn1b	0.668249	3.43093e-10	No_Change
ENSMUSG00000003032	Klf4	-0.981673	5.35078e-38	No_Change
ENSMUSG00000003033	Ap1m1	0.164254	0.18317	No_Change
ENSMUSG00000003037	Rab8a	0.228586	0.0240435	No_Change
ENSMUSG00000003038	Hmgn2	0.130458	0.281378	No_Change
ENSMUSG00000003039	Fam32a	0.131017	0.338635	No_Change
ENSMUSG00000003051	Elf3	-0.644363	1.36015e-12	No_Change
ENSMUSG00000003053	Cyp2c29	-0.00799816	NA	No_Change
ENSMUSG00000003062	Stard3nl	-0.0920972	0.624099	No_Change
ENSMUSG00000003068	Stk11	-0.0892518	0.471831	No_Change
ENSMUSG00000003070	Efna2	-0.031218	0.906137	No_Change
ENSMUSG00000003072	Atp5d	-0.255657	0.000191229	No_Change
ENSMUSG00000003099	Ppp5c	-0.124495	0.19734	No_Change
ENSMUSG00000003119	Cdk12	0.240719	0.0655777	No_Change
ENSMUSG00000003123	Lipe	-0.807305	0.00453474	No_Change
ENSMUSG00000003131	Pafah1b2	-0.180967	0.200372	No_Change
ENSMUSG00000003134	Tbc1d8	0.0727445	0.700436	No_Change
ENSMUSG00000003135	Cnot11	0.00440193	0.986635	No_Change
ENSMUSG00000003153	Slc2a3	-0.183945	2.1299e-09	No_Change
ENSMUSG00000003154	Foxj2	-0.0157078	0.950087	No_Change
ENSMUSG00000003161	Sri	0.211372	0.226157	No_Change
ENSMUSG00000003166	Dgcr2	-0.249004	0.0544682	No_Change
ENSMUSG00000003178	NA	-0.610055	5.29448e-06	No_Change
ENSMUSG00000003184	Irf3	0.00704176	0.978145	No_Change
ENSMUSG00000003190	Bcl2l12	0.0649877	0.788323	No_Change
ENSMUSG00000003198	Zfp959	0.180605	0.200408	No_Change
ENSMUSG00000003199	Mpnd	-0.181545	0.0976558	No_Change
ENSMUSG00000003200	Sh3gl1	-0.107183	0.422919	No_Change
ENSMUSG00000003206	Ebi3	-0.0932517	NA	No_Change
ENSMUSG00000003208	Yju2	0.174429	0.448986	No_Change
ENSMUSG00000003226	Ranbp2	0.211402	0.000608103	No_Change
ENSMUSG00000003227	Edar	0.0456873	NA	No_Change
ENSMUSG00000003228	Grk5	-0.0588926	0.814441	No_Change
ENSMUSG00000003233	Dvl3	0.214029	0.194211	No_Change
ENSMUSG00000003234	Abcf3	0.148856	0.319314	No_Change
ENSMUSG00000003235	Eif2b5	-0.0541717	0.643829	No_Change
ENSMUSG00000003269	Cyth2	-0.112706	0.437058	No_Change
ENSMUSG00000003271	Sult2b1	-0.0049085	0.981201	No_Change
ENSMUSG00000003273	Car11	-0.0467062	0.773209	No_Change
ENSMUSG00000003279	Dlgap1	-0.0310592	0.857146	No_Change
ENSMUSG00000003282	Plag1	-0.105887	0.651836	No_Change
ENSMUSG00000003283	Hck	-0.617261	0.0385776	No_Change
ENSMUSG00000003299	Mrpl4	-0.0862049	0.568204	No_Change
ENSMUSG00000003308	Keap1	0.210374	0.297233	No_Change
ENSMUSG00000003309	Ap1m2	0.0784604	0.748989	No_Change
ENSMUSG00000003316	Glg1	-0.0835376	0.218702	No_Change
ENSMUSG00000003341	Atp8b3	-0.201628	0.37787	No_Change
ENSMUSG00000003344	Btbd2	-0.108723	0.286342	No_Change
ENSMUSG00000003345	Csnk1g2	-0.239716	0.00407523	No_Change
ENSMUSG00000003346	Abhd17a	-0.498029	9.4601e-05	No_Change
ENSMUSG00000003348	Mob3a	-0.36778	0.0632592	No_Change
ENSMUSG00000003352	Cacnb3	0.00374318	0.986556	No_Change
ENSMUSG00000003354	Ccdc65	0.141743	0.333978	No_Change
ENSMUSG00000003355	Fkbp11	-0.382995	0.0921323	No_Change
ENSMUSG00000003360	Ddx23	-0.127265	0.167381	No_Change
ENSMUSG00000003363	Pld3	0.10167	0.282265	No_Change
ENSMUSG00000003378	Grik5	-0.214831	0.275945	No_Change
ENSMUSG00000003379	Cd79a	-0.0767963	0.470429	No_Change
ENSMUSG00000003380	Rabac1	-0.139646	0.29541	No_Change
ENSMUSG00000003382	Etv3	-0.00756779	0.975551	No_Change
ENSMUSG00000003402	Prkcsh	-0.426375	4.1112e-10	No_Change
ENSMUSG00000003410	Elavl3	-1.76899	7.11602e-36	KO_down
ENSMUSG00000003411	Rab3b	-0.0538838	0.832263	No_Change
ENSMUSG00000003418	St8sia6	-0.187967	0.240972	No_Change
ENSMUSG00000003420	Fcgrt	-0.729393	0.0142844	No_Change
ENSMUSG00000003421	Nosip	-0.204677	0.144313	No_Change
ENSMUSG00000003423	Pih1d1	0.357211	0.0393087	No_Change
ENSMUSG00000003429	Rps11	0.0418061	0.469771	No_Change
ENSMUSG00000003435	Supt5	-0.0167065	0.860182	No_Change
ENSMUSG00000003436	Dll3	-0.033987	0.859883	No_Change
ENSMUSG00000003437	Paf1	-0.145646	0.206692	No_Change
ENSMUSG00000003438	Timm50	-0.154688	0.158247	No_Change
ENSMUSG00000003444	Med29	-0.234104	0.267385	No_Change
ENSMUSG00000003452	Bicd1	1.38766	0.000379704	KO_up
ENSMUSG00000003458	Ncstn	0.309232	0.0452802	No_Change
ENSMUSG00000003464	Pex19	-0.164117	0.288717	No_Change
ENSMUSG00000003469	Phyhip	0.0572798	0.82321	No_Change
ENSMUSG00000003476	Crhr2	-0.0316011	NA	No_Change
ENSMUSG00000003500	Impdh1	-0.428252	0.000295669	No_Change
ENSMUSG00000003518	Dusp3	-0.112058	0.550033	No_Change
ENSMUSG00000003526	Prodh	0.334841	0.0916019	No_Change
ENSMUSG00000003527	Ess2	-0.0537645	0.806152	No_Change
ENSMUSG00000003528	Slc25a1	-0.172029	0.153322	No_Change
ENSMUSG00000003531	Dgcr6	-0.080725	0.705041	No_Change
ENSMUSG00000003534	Ddr1	0.0482929	0.832633	No_Change
ENSMUSG00000003541	Ier3	-0.186761	0.412122	No_Change
ENSMUSG00000003545	Fosb	0.15205	0.487492	No_Change
ENSMUSG00000003546	Klc4	-0.29543	0.0948229	No_Change
ENSMUSG00000003549	Ercc1	0.0257625	0.920834	No_Change
ENSMUSG00000003559	As3mt	0.267162	0.191469	No_Change
ENSMUSG00000003573	Homer3	-0.0476626	0.82981	No_Change
ENSMUSG00000003575	Crtc1	-0.311645	0.0777375	No_Change
ENSMUSG00000003581	Rnf215	0.138803	0.529957	No_Change
ENSMUSG00000003585	Sec14l2	0.467669	0.0719571	No_Change
ENSMUSG00000003604	Aven	-0.779248	0.00184114	No_Change
ENSMUSG00000003617	Cp	0.00768115	NA	No_Change
ENSMUSG00000003623	Crot	0.0974362	0.59392	No_Change
ENSMUSG00000003644	Rps6ka1	-0.129948	0.0832816	No_Change
ENSMUSG00000003657	Calb2	0.035973	0.855694	No_Change
ENSMUSG00000003660	Snrnp200	0.00418592	0.968858	No_Change
ENSMUSG00000003662	Ciao1	0.231607	0.164167	No_Change
ENSMUSG00000003665	Has1	-0.00793017	NA	No_Change
ENSMUSG00000003680	Taf6l	0.0789938	0.706761	No_Change
ENSMUSG00000003721	Insig2	-0.0435018	0.866164	No_Change
ENSMUSG00000003731	Kpna6	0.0100046	0.939721	No_Change
ENSMUSG00000003746	Man1a	-0.180015	0.432673	No_Change
ENSMUSG00000003752	Itpkc	-0.00754003	0.978909	No_Change
ENSMUSG00000003762	Coq8b	0.421674	0.0500467	No_Change
ENSMUSG00000003778	Brd8	0.192014	0.0251559	No_Change
ENSMUSG00000003779	Kif20a	0.100439	0.222542	No_Change
ENSMUSG00000003808	Farsa	-0.197852	0.0442715	No_Change
ENSMUSG00000003809	Gcdh	-0.118277	0.178811	No_Change
ENSMUSG00000003810	Mast2	0.322591	0.00580048	No_Change
ENSMUSG00000003812	Dnase2a	0.0132038	0.961859	No_Change
ENSMUSG00000003813	Rad23a	0.259708	0.00347786	No_Change
ENSMUSG00000003814	Calr	-0.570486	1.9191e-68	No_Change
ENSMUSG00000003824	Syce2	-0.269184	0.0249443	No_Change
ENSMUSG00000003847	Nfat5	0.22158	0.0383432	No_Change
ENSMUSG00000003848	Nob1	-0.0858074	0.489797	No_Change
ENSMUSG00000003849	Nqo1	-1.44308	1.81706e-14	KO_down
ENSMUSG00000003863	Ppfia3	0.00884519	0.980642	No_Change
ENSMUSG00000003865	Gys1	-0.0895223	0.526849	No_Change
ENSMUSG00000003868	Ruvbl2	-0.481719	7.48735e-20	No_Change
ENSMUSG00000003872	Lin7b	-0.364571	0.142751	No_Change
ENSMUSG00000003873	Bax	-0.0678113	0.554612	No_Change
ENSMUSG00000003923	Tfam	-0.134827	0.265909	No_Change
ENSMUSG00000003929	Zfp81	0.0542122	0.816737	No_Change
ENSMUSG00000003934	Efnb3	-0.284457	0.212973	No_Change
ENSMUSG00000003948	Mmd	0.095734	0.675055	No_Change
ENSMUSG00000003949	Hlf	0.00962727	NA	No_Change
ENSMUSG00000003955	Fam162a	-0.3809	6.82516e-05	No_Change
ENSMUSG00000003970	Rpl8	-0.0837244	0.0463922	No_Change
ENSMUSG00000003992	Ssbp2	-0.23317	0.287052	No_Change
ENSMUSG00000004018	Fancl	0.13332	0.533936	No_Change
ENSMUSG00000004031	Brinp2	-0.0375729	0.817653	No_Change
ENSMUSG00000004032	Gstm5	0.563172	0.0211711	No_Change
ENSMUSG00000004035	Gstm7	-0.142796	0.465005	No_Change
ENSMUSG00000004038	Gstm3	-3.05783	7.9247e-19	KO_down
ENSMUSG00000004040	Stat3	-0.23195	0.00334279	No_Change
ENSMUSG00000004043	Stat5a	0.0877903	0.722661	No_Change
ENSMUSG00000004044	Cavin1	-0.427926	0.000172833	No_Change
ENSMUSG00000004054	Map3k11	0.453037	0.014688	No_Change
ENSMUSG00000004056	Akt2	-0.0607506	0.654425	No_Change
ENSMUSG00000004069	Dnaja3	0.117063	0.35418	No_Change
ENSMUSG00000004070	Hmox2	-0.00343189	0.987641	No_Change
ENSMUSG00000004071	Cdip1	-0.118568	0.484001	No_Change
ENSMUSG00000004085	Map3k20	0.473969	0.000983178	No_Change
ENSMUSG00000004096	Cwc15	-0.01725	0.926305	No_Change
ENSMUSG00000004098	Col5a3	-1.28734	2.13337e-19	KO_down
ENSMUSG00000004099	Dnmt1	-0.279651	2.92006e-11	No_Change
ENSMUSG00000004100	Ppan	-0.240732	0.00993175	No_Change
ENSMUSG00000004105	Angptl2	-0.620122	0.0582483	No_Change
ENSMUSG00000004113	Cacna1b	-0.674365	0.0184332	No_Change
ENSMUSG00000004127	Trmt10a	0.598035	0.00361561	No_Change
ENSMUSG00000004151	Etv1	0.154565	0.400705	No_Change
ENSMUSG00000004187	Kifc2	-0.166084	0.428735	No_Change
ENSMUSG00000004207	Psap	-0.122284	0.0205911	No_Change
ENSMUSG00000004221	Ikbkg	0.107505	0.590864	No_Change
ENSMUSG00000004231	Pax2	-0.112741	0.317067	No_Change
ENSMUSG00000004233	Wars2	0.818079	0.00773364	No_Change
ENSMUSG00000004263	Atn1	-0.210362	0.0636302	No_Change
ENSMUSG00000004264	Phb2	-0.180801	0.00305702	No_Change
ENSMUSG00000004266	Ptpn6	-0.746192	6.26023e-07	No_Change
ENSMUSG00000004267	Eno2	-0.326742	0.0144553	No_Change
ENSMUSG00000004268	Emg1	-0.207013	0.014467	No_Change
ENSMUSG00000004270	Lpcat3	-0.196454	0.0367936	No_Change
ENSMUSG00000004285	Atp6v1f	0.0276687	0.889082	No_Change
ENSMUSG00000004317	Clcn5	0.965364	9.12325e-09	No_Change
ENSMUSG00000004319	Clcn3	-0.0756705	0.468183	No_Change
ENSMUSG00000004328	Hif3a	-0.566787	0.000543558	No_Change
ENSMUSG00000004341	Gpx6	0.0112521	0.953575	No_Change
ENSMUSG00000004347	Pde1c	0.0405698	NA	No_Change
ENSMUSG00000004356	Utp20	0.235115	0.00800029	No_Change
ENSMUSG00000004359	Spic	-1.96437	1.25936e-09	KO_down
ENSMUSG00000004360	9330159F19Rik	-0.146204	NA	No_Change
ENSMUSG00000004364	Cul3	0.195335	0.0182519	No_Change
ENSMUSG00000004371	Il11	-0.0292894	NA	No_Change
ENSMUSG00000004383	Large1	-0.0293958	0.897443	No_Change
ENSMUSG00000004393	Ddx56	-0.0306825	0.87333	No_Change
ENSMUSG00000004394	Tmed4	-0.243328	0.14675	No_Change
ENSMUSG00000004415	Col26a1	0.094326	0.633882	No_Change
ENSMUSG00000004446	Bid	-0.267809	0.0301231	No_Change
ENSMUSG00000004451	Ralb	-0.284689	0.00246695	No_Change
ENSMUSG00000004455	Ppp1cc	-0.084664	0.249215	No_Change
ENSMUSG00000004460	Dnajb11	-0.295174	0.00797005	No_Change
ENSMUSG00000004462	Tbccd1	0.165486	0.402602	No_Change
ENSMUSG00000004473	Clec11a	0.0232343	0.874675	No_Change
ENSMUSG00000004500	Zfp324	1.55917	0.00490831	KO_up
ENSMUSG00000004508	Gab2	1.38025	0.00187328	KO_up
ENSMUSG00000004530	Coro1c	-0.163499	0.0104075	No_Change
ENSMUSG00000004535	Tax1bp1	0.124494	0.249283	No_Change
ENSMUSG00000004540	Psg17	0.00768115	NA	No_Change
ENSMUSG00000004558	Ndrg2	-1.44135	1.05741e-31	KO_down
ENSMUSG00000004561	Mettl17	-0.651868	0.00408191	No_Change
ENSMUSG00000004562	Arhgef40	-0.343722	0.0927449	No_Change
ENSMUSG00000004565	Pnpla6	-0.112005	0.320886	No_Change
ENSMUSG00000004567	Mcoln1	0.327953	0.00226308	No_Change
ENSMUSG00000004568	Arhgef18	0.0485942	0.631811	No_Change
ENSMUSG00000004591	Pkn2	-0.0192699	0.891126	No_Change
ENSMUSG00000004610	Etfb	0.256446	0.0159664	No_Change
ENSMUSG00000004612	Nkg7	0.0093265	NA	No_Change
ENSMUSG00000004626	Stxbp2	0.218154	0.0215324	No_Change
ENSMUSG00000004631	Sgce	0.938458	0.00229337	No_Change
ENSMUSG00000004633	Chn2	0.525228	0.0634245	No_Change
ENSMUSG00000004637	Wwox	0.303751	0.120858	No_Change
ENSMUSG00000004642	Slbp	-0.178879	0.0510785	No_Change
ENSMUSG00000004655	Aqp1	0.0369028	NA	No_Change
ENSMUSG00000004661	Arid3b	0.179468	0.0991346	No_Change
ENSMUSG00000004665	Cnn2	-0.754244	1.15262e-07	No_Change
ENSMUSG00000004667	Polr2e	-0.511181	4.71816e-20	No_Change
ENSMUSG00000004668	Abca13	-0.0160088	NA	No_Change
ENSMUSG00000004677	Myo9b	-0.0283199	0.816872	No_Change
ENSMUSG00000004698	Hdac9	0.24067	0.288381	No_Change
ENSMUSG00000004748	Mtfp1	0.266912	0.258815	No_Change
ENSMUSG00000004768	Rab23	-0.128216	0.471797	No_Change
ENSMUSG00000004771	Rab11a	-0.0432169	0.792696	No_Change
ENSMUSG00000004788	Eif2b2	-0.271694	0.0447943	No_Change
ENSMUSG00000004789	Dlst	-0.194667	0.00596372	No_Change
ENSMUSG00000004791	Pgf	0.0666574	0.729661	No_Change
ENSMUSG00000004798	Ulk2	0.735514	0.00121327	No_Change
ENSMUSG00000004814	Ccl24	-0.0105975	NA	No_Change
ENSMUSG00000004815	Dgkq	-0.0192976	0.943041	No_Change
ENSMUSG00000004842	Pou1f1	-0.00793017	NA	No_Change
ENSMUSG00000004843	Chmp2b	0.203303	0.249833	No_Change
ENSMUSG00000004846	Plod3	0.102469	0.578206	No_Change
ENSMUSG00000004849	Ap1s1	-0.0412181	0.832263	No_Change
ENSMUSG00000004864	Mapk13	0.128906	0.401495	No_Change
ENSMUSG00000004865	Srpk1	0.0518626	0.596427	No_Change
ENSMUSG00000004872	Pax3	-0.00867467	NA	No_Change
ENSMUSG00000004880	Lbr	-0.194548	0.00528047	No_Change
ENSMUSG00000004885	Crabp2	0.111319	0.540617	No_Change
ENSMUSG00000004891	Nes	-0.106647	0.427304	No_Change
ENSMUSG00000004892	Bcan	-0.158899	0.489924	No_Change
ENSMUSG00000004895	Prcc	-0.198138	0.055027	No_Change
ENSMUSG00000004896	Rrnad1	-0.050657	0.82321	No_Change
ENSMUSG00000004897	Hdgf	-0.0647989	0.297863	No_Change
ENSMUSG00000004902	Slc25a18	-0.00609014	NA	No_Change
ENSMUSG00000004929	Thop1	-0.228596	0.00528643	No_Change
ENSMUSG00000004931	Apba3	-0.0310047	0.882927	No_Change
ENSMUSG00000004933	Matk	-0.038624	0.816872	No_Change
ENSMUSG00000004934	Pias4	-0.289078	0.00395016	No_Change
ENSMUSG00000004936	Map2k1	-0.561444	3.66413e-10	No_Change
ENSMUSG00000004937	Sgta	-0.202405	0.0267305	No_Change
ENSMUSG00000004945	Tmem242	0.0243719	0.921263	No_Change
ENSMUSG00000004947	Dtx2	-0.119569	0.44697	No_Change
ENSMUSG00000004948	Zp3	-0.144638	0.171142	No_Change
ENSMUSG00000004951	Hspb1	0.129088	0.163022	No_Change
ENSMUSG00000004952	Rasa4	-1.01462	7.64071e-11	KO_down
ENSMUSG00000004961	Syt5	0.101603	0.663123	No_Change
ENSMUSG00000004980	Hnrnpa2b1	0.222248	1.66234e-07	No_Change
ENSMUSG00000004988	Fxyd4	0.0248119	NA	No_Change
ENSMUSG00000004994	Ccdc130	0.0703499	0.75929	No_Change
ENSMUSG00000004996	Mri1	-0.307592	0.0311605	No_Change
ENSMUSG00000005034	Prkacb	-0.087051	0.581577	No_Change
ENSMUSG00000005043	Sgsh	0.842258	0.0346079	No_Change
ENSMUSG00000005045	Chd5	-0.00347573	0.990366	No_Change
ENSMUSG00000005054	Cstb	-0.0198084	0.921824	No_Change
ENSMUSG00000005057	Sh2b2	-0.363085	0.126193	No_Change
ENSMUSG00000005069	Pex5	-0.167405	0.090437	No_Change
ENSMUSG00000005078	Jkamp	0.0573345	0.773042	No_Change
ENSMUSG00000005087	Cd44	0.0533305	NA	No_Change
ENSMUSG00000005089	Slc1a2	0.00662485	NA	No_Change
ENSMUSG00000005102	Eif2ak4	-0.0332055	0.841297	No_Change
ENSMUSG00000005103	Wdr1	-0.232216	0.0796495	No_Change
ENSMUSG00000005107	Slc2a9	0.00901924	NA	No_Change
ENSMUSG00000005124	Ccn4	-0.0249657	NA	No_Change
ENSMUSG00000005125	Ndrg1	-0.0878947	0.570193	No_Change
ENSMUSG00000005131	4930550C14Rik	0.0465147	NA	No_Change
ENSMUSG00000005142	Man2b1	-0.0498895	0.672558	No_Change
ENSMUSG00000005148	Klf5	0.650424	1.90457e-14	No_Change
ENSMUSG00000005150	Wdr83	0.302225	0.163096	No_Change
ENSMUSG00000005161	Prdx2	-0.240756	0.000291549	No_Change
ENSMUSG00000005198	Polr2a	-0.0624429	0.300507	No_Change
ENSMUSG00000005204	Senp3	-0.508617	7.62934e-16	No_Change
ENSMUSG00000005225	Plekha8	0.330115	0.00763101	No_Change
ENSMUSG00000005232	G6pc2	-0.00799816	NA	No_Change
ENSMUSG00000005233	Spc25	-0.00976202	0.958572	No_Change
ENSMUSG00000005237	Dnah2	-0.0931738	0.699483	No_Change
ENSMUSG00000005251	Ripk4	-0.341172	0.111372	No_Change
ENSMUSG00000005262	Ufd1	-0.231741	0.129021	No_Change
ENSMUSG00000005267	Zfp287	0.141512	0.443572	No_Change
ENSMUSG00000005268	Prlr	0.0502598	0.713399	No_Change
ENSMUSG00000005299	Letm1	-0.105154	0.467713	No_Change
ENSMUSG00000005312	Ubqln1	-0.187077	0.00428863	No_Change
ENSMUSG00000005320	Fgfr4	-0.941998	0.000329672	No_Change
ENSMUSG00000005338	Cadm3	-0.0479762	NA	No_Change
ENSMUSG00000005354	Txn2	-0.391564	4.99656e-05	No_Change
ENSMUSG00000005355	Casp14	0.101501	NA	No_Change
ENSMUSG00000005357	Slc1a6	0.119432	0.460192	No_Change
ENSMUSG00000005360	Slc1a3	0.190171	0.409234	No_Change
ENSMUSG00000005362	Crbn	0.245915	0.0664074	No_Change
ENSMUSG00000005370	Msh6	-0.11292	0.0194016	No_Change
ENSMUSG00000005371	Fbxo11	0.178694	0.189668	No_Change
ENSMUSG00000005373	Mlxipl	-0.0434827	0.870709	No_Change
ENSMUSG00000005374	Tbl2	-0.25692	0.00664021	No_Change
ENSMUSG00000005378	Bud23	0.138042	0.354287	No_Change
ENSMUSG00000005397	Nid1	-1.732	1.18456e-133	KO_down
ENSMUSG00000005410	Mcm5	-0.16142	0.00116375	No_Change
ENSMUSG00000005413	Hmox1	0.173304	0.0636337	No_Change
ENSMUSG00000005417	Mprip	0.086531	0.358625	No_Change
ENSMUSG00000005442	Cic	0.198817	0.00274921	No_Change
ENSMUSG00000005447	Pafah1b3	-0.113397	0.546454	No_Change
ENSMUSG00000005465	Il27ra	-0.0706359	0.72386	No_Change
ENSMUSG00000005469	Prkaca	-0.205154	0.0157681	No_Change
ENSMUSG00000005470	Asf1b	-0.404983	0.000667128	No_Change
ENSMUSG00000005474	Myl10	0.0113157	NA	No_Change
ENSMUSG00000005481	Ddx39a	0.0275309	0.798117	No_Change
ENSMUSG00000005483	Dnajb1	-0.271575	0.0326633	No_Change
ENSMUSG00000005493	Msh4	-0.142641	0.356369	No_Change
ENSMUSG00000005501	Usp40	0.0760626	0.743065	No_Change
ENSMUSG00000005503	Evx1	0.00035371	NA	No_Change
ENSMUSG00000005505	Kbtbd4	0.0498891	0.849565	No_Change
ENSMUSG00000005506	Celf1	-0.0387714	0.631606	No_Change
ENSMUSG00000005510	Ndufs3	-0.259849	0.0946013	No_Change
ENSMUSG00000005514	Por	-0.589086	1.45288e-12	No_Change
ENSMUSG00000005533	Igf1r	0.0201794	0.935115	No_Change
ENSMUSG00000005534	Insr	0.286621	0.040503	No_Change
ENSMUSG00000005553	Atp4a	0.0794425	0.658792	No_Change
ENSMUSG00000005566	Trim28	0.238613	1.77108e-10	No_Change
ENSMUSG00000005575	Ube2m	0.315493	0.0115909	No_Change
ENSMUSG00000005580	Adcy9	0.55193	0.0486335	No_Change
ENSMUSG00000005583	Mef2c	-0.00709009	NA	No_Change
ENSMUSG00000005609	Ctr9	0.0143494	0.927727	No_Change
ENSMUSG00000005610	Eif4g2	0.36439	8.96722e-22	No_Change
ENSMUSG00000005611	Irag1	0.00753164	NA	No_Change
ENSMUSG00000005615	Pcyt1a	0.465644	0.00645647	No_Change
ENSMUSG00000005621	Zfp592	-0.104391	0.514322	No_Change
ENSMUSG00000005625	Psmd4	-0.0664185	0.483835	No_Change
ENSMUSG00000005628	Tmod4	-0.0222348	NA	No_Change
ENSMUSG00000005640	Insrr	0.0799638	NA	No_Change
ENSMUSG00000005656	Snx6	0.301377	0.00415837	No_Change
ENSMUSG00000005667	Mthfd2	0.231134	0.0175959	No_Change
ENSMUSG00000005672	Kit	-0.343786	9.57754e-06	No_Change
ENSMUSG00000005674	Tomm40l	0.39013	0.0554934	No_Change
ENSMUSG00000005677	Nr1i3	-0.0214121	NA	No_Change
ENSMUSG00000005681	Apoa2	-0.110689	0.545435	No_Change
ENSMUSG00000005682	Pan2	0.060829	0.625709	No_Change
ENSMUSG00000005683	Cs	-0.297352	1.85599e-10	No_Change
ENSMUSG00000005686	Ampd3	0.172772	0.436565	No_Change
ENSMUSG00000005687	Bcas2	-0.0632921	0.578791	No_Change
ENSMUSG00000005696	Sh2d1a	0.00725035	NA	No_Change
ENSMUSG00000005698	Ctcf	0.16195	0.0660168	No_Change
ENSMUSG00000005699	Pard6a	0.0502241	0.840944	No_Change
ENSMUSG00000005705	Agrp	-0.0351156	NA	No_Change
ENSMUSG00000005716	Pvalb	-0.0617644	NA	No_Change
ENSMUSG00000005718	Tfap4	0.236028	0.278098	No_Change
ENSMUSG00000005732	Ranbp1	0.310502	3.29447e-06	No_Change
ENSMUSG00000005763	Cd247	0.0150317	NA	No_Change
ENSMUSG00000005774	Rfx5	0.0108402	0.97022	No_Change
ENSMUSG00000005779	Psmb4	-0.103826	0.233362	No_Change
ENSMUSG00000005802	Slc30a4	0.979487	2.03395e-05	No_Change
ENSMUSG00000005803	Sqor	0.0257558	0.85637	No_Change
ENSMUSG00000005804	Bloc1s6	0.348631	0.053746	No_Change
ENSMUSG00000005813	Metap1	-0.0440551	0.780702	No_Change
ENSMUSG00000005823	Gpr108	0.19354	0.284291	No_Change
ENSMUSG00000005836	Gata6	0.0226153	0.935115	No_Change
ENSMUSG00000005846	Rsl1d1	-0.203996	0.00291929	No_Change
ENSMUSG00000005871	Apc	0.506436	1.494e-10	No_Change
ENSMUSG00000005873	Reep5	0.0813581	0.627027	No_Change
ENSMUSG00000005881	Ergic3	-0.0928802	0.443877	No_Change
ENSMUSG00000005882	Uqcc1	-0.31644	0.0535994	No_Change
ENSMUSG00000005883	Spo11	0.0134271	NA	No_Change
ENSMUSG00000005886	Ncoa2	0.277373	0.0422698	No_Change
ENSMUSG00000005892	Trh	0.585069	0.0133035	No_Change
ENSMUSG00000005893	Nr2c2	0.279768	0.106043	No_Change
ENSMUSG00000005897	Nr2c1	0.23326	0.305612	No_Change
ENSMUSG00000005899	Smpd4	-0.254864	0.00508433	No_Change
ENSMUSG00000005907	Pex1	0.20188	0.223992	No_Change
ENSMUSG00000005917	Otx1	-0.0105423	0.969933	No_Change
ENSMUSG00000005936	Kctd20	-0.111506	0.293146	No_Change
ENSMUSG00000005947	Itgae	-0.205556	0.286146	No_Change
ENSMUSG00000005949	Ctns	0.396267	0.0275569	No_Change
ENSMUSG00000005950	P2rx5	0.110833	0.476343	No_Change
ENSMUSG00000005951	Shpk	0.163359	0.33989	No_Change
ENSMUSG00000005952	Trpv1	-0.00799816	NA	No_Change
ENSMUSG00000005958	Ephb3	-0.366852	0.00768016	No_Change
ENSMUSG00000005968	Tuft1	-0.528912	0.0416217	No_Change
ENSMUSG00000005973	Rcn1	-1.33996	1.75217e-38	KO_down
ENSMUSG00000005980	Dnase1	-0.00709009	NA	No_Change
ENSMUSG00000005981	Trap1	0.154042	0.0594189	No_Change
ENSMUSG00000005982	Naa60	-0.0615623	0.783744	No_Change
ENSMUSG00000005983	1700037C18Rik	0.0289671	0.852199	No_Change
ENSMUSG00000005986	Ankrd13d	-0.0972121	0.67289	No_Change
ENSMUSG00000005994	Tyrp1	0.00725035	NA	No_Change
ENSMUSG00000006005	Tpr	0.131417	0.0580343	No_Change
ENSMUSG00000006007	Pdc	-0.00799816	NA	No_Change
ENSMUSG00000006010	Odr4	0.288098	0.143927	No_Change
ENSMUSG00000006014	Prg4	0.00035371	NA	No_Change
ENSMUSG00000006019	Dhx34	0.207433	0.298439	No_Change
ENSMUSG00000006021	Kptn	0.17227	0.425823	No_Change
ENSMUSG00000006024	Napa	0.241532	0.0465839	No_Change
ENSMUSG00000006050	Sra1	0.13512	0.421477	No_Change
ENSMUSG00000006056	Calcoco2	-0.791371	1.37461e-10	No_Change
ENSMUSG00000006057	Atp5g1	-0.350896	0.000137493	No_Change
ENSMUSG00000006058	Snf8	0.0836153	0.620289	No_Change
ENSMUSG00000006095	Tbcb	0.00990529	0.960611	No_Change
ENSMUSG00000006127	Inpp5k	0.148654	0.454514	No_Change
ENSMUSG00000006134	Crkl	0.129617	0.277559	No_Change
ENSMUSG00000006143	Upk3bl	-0.140719	NA	No_Change
ENSMUSG00000006154	Eps8l1	0.0665883	NA	No_Change
ENSMUSG00000006169	Clint1	-0.30153	0.001807	No_Change
ENSMUSG00000006179	Prss16	0.0545896	0.835273	No_Change
ENSMUSG00000006191	Cdkal1	0.108194	0.565849	No_Change
ENSMUSG00000006200	Rhox6	3.14383	3.6172e-23	KO_up
ENSMUSG00000006205	Htra1	-0.831584	4.82713e-06	No_Change
ENSMUSG00000006215	Zbtb17	-0.0864968	0.596443	No_Change
ENSMUSG00000006216	Clcnkb	-0.206256	0.254481	No_Change
ENSMUSG00000006218	Fam131c	-1.24708	2.96696e-12	KO_down
ENSMUSG00000006219	Fblim1	-0.392429	3.71327e-07	No_Change
ENSMUSG00000006221	Hspb7	-0.0189343	NA	No_Change
ENSMUSG00000006235	Epor	-0.275424	0.168724	No_Change
ENSMUSG00000006241	Ccdc159	-0.076286	0.647091	No_Change
ENSMUSG00000006262	Mob1b	0.0813881	0.701448	No_Change
ENSMUSG00000006269	Atp6v1b1	0.00725035	NA	No_Change
ENSMUSG00000006270	Vax1	1.03886e-05	NA	No_Change
ENSMUSG00000006273	Atp6v1b2	0.473569	8.91294e-14	No_Change
ENSMUSG00000006276	Eps15l1	-0.0452015	0.715032	No_Change
ENSMUSG00000006281	Tep1	0.239755	0.137569	No_Change
ENSMUSG00000006288	Ttc5	-0.138188	0.386541	No_Change
ENSMUSG00000006289	Osgep	0.213962	0.0757931	No_Change
ENSMUSG00000006299	Aamp	-0.208494	0.0106618	No_Change
ENSMUSG00000006301	Tmbim1	0.114788	0.628467	No_Change
ENSMUSG00000006304	Arpc2	0.0321815	0.816845	No_Change
ENSMUSG00000006307	Kmt2b	0.338001	4.83895e-05	No_Change
ENSMUSG00000006310	Zbtb32	-0.4381	0.0998402	No_Change
ENSMUSG00000006311	Etv2	-0.0240477	NA	No_Change
ENSMUSG00000006313	Upk1a	-0.026847	0.873391	No_Change
ENSMUSG00000006315	Tmem147	-0.316826	0.0882799	No_Change
ENSMUSG00000006333	Rps9	-0.0359661	0.458485	No_Change
ENSMUSG00000006335	Tfpt	0.100762	0.659694	No_Change
ENSMUSG00000006342	Susd2	0.283856	0.0351084	No_Change
ENSMUSG00000006344	Ggt5	-0.00952519	NA	No_Change
ENSMUSG00000006345	Ggt1	-3.05725	6.28535e-29	KO_down
ENSMUSG00000006356	Crip2	-1.266	1.08837e-21	KO_down
ENSMUSG00000006360	Crip1	-1.43184	6.55064e-12	KO_down
ENSMUSG00000006362	Cbfa2t3	0.140782	0.258194	No_Change
ENSMUSG00000006369	Fbln1	-0.628241	5.0476e-10	No_Change
ENSMUSG00000006373	Pgrmc1	-0.162555	0.282556	No_Change
ENSMUSG00000006378	Gcat	-0.258596	0.0491649	No_Change
ENSMUSG00000006386	Tek	-0.0237422	0.897554	No_Change
ENSMUSG00000006390	Elovl1	-0.368713	0.0585642	No_Change
ENSMUSG00000006392	Med8	-0.0978434	0.62446	No_Change
ENSMUSG00000006395	Hyi	-0.0979419	0.632899	No_Change
ENSMUSG00000006398	Cdc20	0.147639	0.121401	No_Change
ENSMUSG00000006403	Adamts4	0.0709248	0.733337	No_Change
ENSMUSG00000006411	Nectin4	-1.25838	0.000991354	KO_down
ENSMUSG00000006412	Pfdn2	-0.161773	0.144753	No_Change
ENSMUSG00000006418	Rnf114	-0.271605	0.00806707	No_Change
ENSMUSG00000006423	Steep1	0.181037	0.366763	No_Change
ENSMUSG00000006435	Neurl1a	-0.474285	0.00132512	No_Change
ENSMUSG00000006442	Srm	-0.589046	1.06574e-12	No_Change
ENSMUSG00000006445	Epha2	-1.57162	4.73429e-27	KO_down
ENSMUSG00000006456	Rbm14	-0.0161108	0.928118	No_Change
ENSMUSG00000006457	Actn3	-1.98097	1.50174e-07	KO_down
ENSMUSG00000006463	Zdhhc24	-0.432928	0.0413612	No_Change
ENSMUSG00000006464	Bbs1	0.194966	0.395206	No_Change
ENSMUSG00000006469	Slc34a3	0.0375274	NA	No_Change
ENSMUSG00000006471	Ndor1	0.040224	0.86611	No_Change
ENSMUSG00000006476	Nsmf	0.0149835	0.953979	No_Change
ENSMUSG00000006494	Pdk1	-0.0983404	0.43608	No_Change
ENSMUSG00000006498	Ptbp1	-0.14512	0.000678908	No_Change
ENSMUSG00000006517	Mvd	-0.717409	8.57818e-11	No_Change
ENSMUSG00000006519	Cyba	-0.284342	0.101239	No_Change
ENSMUSG00000006522	Itih3	-0.00243988	NA	No_Change
ENSMUSG00000006526	Stimate	-0.384844	0.0301983	No_Change
ENSMUSG00000006527	Sfmbt1	0.131228	0.517622	No_Change
ENSMUSG00000006529	Itih1	-0.0210603	NA	No_Change
ENSMUSG00000006538	Ihh	-0.00596682	NA	No_Change
ENSMUSG00000006542	Prkag3	0.0576192	NA	No_Change
ENSMUSG00000006546	Cryba2	-0.00799816	NA	No_Change
ENSMUSG00000006567	Atp7b	0.977979	2.0288e-05	No_Change
ENSMUSG00000006574	Slc4a1	-0.0291682	0.860243	No_Change
ENSMUSG00000006575	Rundc3a	-0.668664	7.72435e-05	No_Change
ENSMUSG00000006576	Slc4a3	-0.38012	0.106526	No_Change
ENSMUSG00000006585	Cdt1	-0.218327	0.000808083	No_Change
ENSMUSG00000006586	Runx1t1	-0.0233766	0.904564	No_Change
ENSMUSG00000006587	Snai3	-0.957385	0.00864439	No_Change
ENSMUSG00000006589	Aprt	-0.250199	0.00126759	No_Change
ENSMUSG00000006599	Gtf2h1	0.0240289	0.866942	No_Change
ENSMUSG00000006611	Hfe	-0.00704103	0.967136	No_Change
ENSMUSG00000006638	Abhd1	0.0859033	0.649901	No_Change
ENSMUSG00000006641	Slc5a6	0.200717	0.333978	No_Change
ENSMUSG00000006649	Nphs1	-1.63321	1.66653e-12	KO_down
ENSMUSG00000006651	Aplp1	-1.41571	1.06099e-45	KO_down
ENSMUSG00000006673	Qrich1	0.037278	0.815244	No_Change
ENSMUSG00000006675	P4htm	-0.0244856	0.907302	No_Change
ENSMUSG00000006676	Usp19	-0.193555	0.117858	No_Change
ENSMUSG00000006678	Pola1	0.389499	6.24126e-07	No_Change
ENSMUSG00000006699	Cdc42	-0.0264525	0.785078	No_Change
ENSMUSG00000006705	Pknox1	0.0994405	0.612008	No_Change
ENSMUSG00000006711	D130043K22Rik	-0.0633625	NA	No_Change
ENSMUSG00000006715	Gmnn	-0.160183	0.168815	No_Change
ENSMUSG00000006717	Acot13	0.424128	0.009204	No_Change
ENSMUSG00000006720	Zfp184	-0.0827684	0.708282	No_Change
ENSMUSG00000006724	Cyp27b1	-0.0336137	NA	No_Change
ENSMUSG00000006728	Cdk4	0.129707	0.0607928	No_Change
ENSMUSG00000006731	B4galnt1	0.287241	0.216208	No_Change
ENSMUSG00000006732	Mettl1	-0.0254069	0.922179	No_Change
ENSMUSG00000006736	Tspan31	-0.333443	0.000656076	No_Change
ENSMUSG00000006740	Kif5b	0.223355	0.00151835	No_Change
ENSMUSG00000006763	Saal1	0.109336	0.514352	No_Change
ENSMUSG00000006764	Tph2	0.0288559	NA	No_Change
ENSMUSG00000006777	Krt23	0.0120387	NA	No_Change
ENSMUSG00000006782	Cnp	-0.660596	0.000343702	No_Change
ENSMUSG00000006784	Odad4	-0.0725933	0.719424	No_Change
ENSMUSG00000006800	Sulf2	0.566147	3.68783e-15	No_Change
ENSMUSG00000006818	Sod2	-0.586253	3.07416e-14	No_Change
ENSMUSG00000006850	Tmco6	-0.00579888	0.984022	No_Change
ENSMUSG00000006906	Stambp	0.478332	0.0691541	No_Change
ENSMUSG00000006920	Ezh1	-0.139522	0.258326	No_Change
ENSMUSG00000006930	Hap1	-0.378703	0.00641437	No_Change
ENSMUSG00000006931	P3h4	-0.161319	0.465491	No_Change
ENSMUSG00000006932	Ctnnb1	0.237133	1.53561e-09	No_Change
ENSMUSG00000006941	Eif1b	0.152889	0.425555	No_Change
ENSMUSG00000006948	Klk4	-0.0105975	NA	No_Change
ENSMUSG00000006958	Chrd	0.0498545	0.848458	No_Change
ENSMUSG00000006998	Psmd2	-0.247506	9.09884e-08	No_Change
ENSMUSG00000007021	Syngr3	-0.737495	0.00139473	No_Change
ENSMUSG00000007029	Vars	-0.626079	5.53466e-37	No_Change
ENSMUSG00000007030	Vwa7	-0.347699	0.0822418	No_Change
ENSMUSG00000007033	Hspa1l	-0.000765967	NA	No_Change
ENSMUSG00000007034	Slc44a4	-1.2339	0.0013241	KO_down
ENSMUSG00000007035	Msh5	0.246947	0.286144	No_Change
ENSMUSG00000007036	Abhd16a	0.176948	0.428735	No_Change
ENSMUSG00000007038	Neu1	0.194469	0.103975	No_Change
ENSMUSG00000007039	Ddah2	-0.186858	0.0774538	No_Change
ENSMUSG00000007041	Clic1	-0.106416	0.450312	No_Change
ENSMUSG00000007044	NA	-0.0161163	NA	No_Change
ENSMUSG00000007050	Lsm2	-0.0833302	0.610908	No_Change
ENSMUSG00000007080	Pole	0.269907	0.000173307	No_Change
ENSMUSG00000007097	Atp1a2	-2.84569	1.31036e-07	KO_down
ENSMUSG00000007107	Atp1a4	-0.00462259	NA	No_Change
ENSMUSG00000007122	Casq1	-0.0764002	NA	No_Change
ENSMUSG00000007207	Stx1a	-0.196485	0.35418	No_Change
ENSMUSG00000007216	Zfp775	-0.241022	0.295334	No_Change
ENSMUSG00000007279	Scube2	0.118455	NA	No_Change
ENSMUSG00000007338	Mrpl49	-0.367371	0.00119171	No_Change
ENSMUSG00000007379	Dennd2c	-1.18581	8.38725e-32	KO_down
ENSMUSG00000007411	Mark3	0.123725	0.252774	No_Change
ENSMUSG00000007415	Gatad1	0.119413	0.376579	No_Change
ENSMUSG00000007440	Pcdha10	0.0190392	0.90864	No_Change
ENSMUSG00000007457	2310003L06Rik	0.0113157	NA	No_Change
ENSMUSG00000007458	M6pr	-0.0950391	0.18182	No_Change
ENSMUSG00000007476	Lrrc8a	0.232202	0.1861	No_Change
ENSMUSG00000007480	Mc5r	-0.0198957	NA	No_Change
ENSMUSG00000007564	Ppp2r1a	-0.0312166	0.736472	No_Change
ENSMUSG00000007570	Fance	-0.323471	0.00571949	No_Change
ENSMUSG00000007589	Tinf2	0.110095	0.454656	No_Change
ENSMUSG00000007594	Hapln4	0.50116	0.0651252	No_Change
ENSMUSG00000007603	Dus3l	0.0115827	0.954145	No_Change
ENSMUSG00000007610	Gtpbp3	-0.481853	3.73592e-05	No_Change
ENSMUSG00000007613	Tgfbr1	0.239651	0.129941	No_Change
ENSMUSG00000007617	Homer1	0.259995	0.119093	No_Change
ENSMUSG00000007646	Rad51c	0.81917	3.86145e-05	No_Change
ENSMUSG00000007653	Gabrb2	0.0303735	NA	No_Change
ENSMUSG00000007655	Cav1	0.00768115	NA	No_Change
ENSMUSG00000007656	Arpp19	-0.0042529	0.981712	No_Change
ENSMUSG00000007659	Bcl2l1	0.0442826	0.848028	No_Change
ENSMUSG00000007670	Khsrp	-0.0840103	0.163372	No_Change
ENSMUSG00000007721	Ccdc124	-0.229349	0.01521	No_Change
ENSMUSG00000007739	Cct4	0.120956	0.0073231	No_Change
ENSMUSG00000007777	0610009B22Rik	0.177184	0.421431	No_Change
ENSMUSG00000007783	Cpt1c	-0.256855	0.0594467	No_Change
ENSMUSG00000007812	Zfp655	-0.0172581	0.917766	No_Change
ENSMUSG00000007815	Rhoa	0.0328836	0.742065	No_Change
ENSMUSG00000007817	Zmiz1	0.126839	0.381269	No_Change
ENSMUSG00000007827	Ankrd26	0.24511	0.0586536	No_Change
ENSMUSG00000007833	Aldh16a1	-0.0329071	0.862428	No_Change
ENSMUSG00000007836	Hnrnpa0	-0.0156911	0.878144	No_Change
ENSMUSG00000007837	Prrg2	-0.0736462	0.759147	No_Change
ENSMUSG00000007850	Hnrnph1	0.0747676	0.659694	No_Change
ENSMUSG00000007867	Ift43	0.491598	0.00892211	No_Change
ENSMUSG00000007872	Id3	-0.271016	0.208031	No_Change
ENSMUSG00000007877	Tcap	-0.0105975	NA	No_Change
ENSMUSG00000007880	Arid1a	0.730222	1.26067e-29	No_Change
ENSMUSG00000007888	Crlf1	-0.742958	0.0399889	No_Change
ENSMUSG00000007891	Ctsd	-0.00268202	0.979086	No_Change
ENSMUSG00000007892	Rplp1	-0.153878	0.137594	No_Change
ENSMUSG00000007908	Hmgcll1	0.166975	0.41906	No_Change
ENSMUSG00000007944	Ttc9b	-0.182836	0.102063	No_Change
ENSMUSG00000007946	Phox2a	-0.161251	0.444299	No_Change
ENSMUSG00000007950	Abhd8	-0.664146	3.50715e-06	No_Change
ENSMUSG00000007987	Ift22	0.105684	0.630898	No_Change
ENSMUSG00000007989	Fzd3	-0.0666899	0.792623	No_Change
ENSMUSG00000008028	1700008O03Rik	0.0221583	0.887744	No_Change
ENSMUSG00000008035	Mid1ip1	-0.00546285	0.984636	No_Change
ENSMUSG00000008036	Ap2s1	-0.129253	0.360187	No_Change
ENSMUSG00000008090	Fgfrl1	-0.452836	0.05854	No_Change
ENSMUSG00000008129	Brme1	0.298647	0.192499	No_Change
ENSMUSG00000008136	Fhl2	0.0392197	NA	No_Change
ENSMUSG00000008140	Emc10	-0.153238	0.182613	No_Change
ENSMUSG00000008153	Clstn3	-0.109539	0.618278	No_Change
ENSMUSG00000008167	Fbxw9	0.476784	0.00262134	No_Change
ENSMUSG00000008193	Spib	0.0488051	NA	No_Change
ENSMUSG00000008200	Fnbp4	-0.188501	0.0277113	No_Change
ENSMUSG00000008206	Cers4	-0.854397	2.94865e-08	No_Change
ENSMUSG00000008226	Scrn3	0.186321	0.264341	No_Change
ENSMUSG00000008301	Phax	0.0713754	0.687617	No_Change
ENSMUSG00000008305	Tle1	-0.31832	0.0204043	No_Change
ENSMUSG00000008307	1700109H08Rik	-0.0246367	0.898919	No_Change
ENSMUSG00000008318	Relt	-0.647246	0.0068055	No_Change
ENSMUSG00000008333	Snrpb2	0.1128	0.376083	No_Change
ENSMUSG00000008348	Ubc	-0.572781	1.68623e-32	No_Change
ENSMUSG00000008373	Prpf31	0.446434	3.72143e-05	No_Change
ENSMUSG00000008384	Sertad1	0.0397734	0.884081	No_Change
ENSMUSG00000008393	Carhsp1	-0.277874	0.00423874	No_Change
ENSMUSG00000008398	Elk3	0.304995	0.194929	No_Change
ENSMUSG00000008429	Herpud2	0.487096	0.00362797	No_Change
ENSMUSG00000008435	Rdh13	-0.21987	0.160022	No_Change
ENSMUSG00000008438	Adam21	0.00725035	NA	No_Change
ENSMUSG00000008450	Nutf2	-0.150325	0.0590147	No_Change
ENSMUSG00000008461	Fut1	0.0896109	NA	No_Change
ENSMUSG00000008475	Arpc5	-0.0112688	0.953628	No_Change
ENSMUSG00000008482	Rnf151	-0.00733578	NA	No_Change
ENSMUSG00000008489	Elavl2	-0.378538	0.0508068	No_Change
ENSMUSG00000008496	Pou2f2	-0.0811523	0.672743	No_Change
ENSMUSG00000008540	Mgst1	0.0865402	0.678299	No_Change
ENSMUSG00000008575	Nfib	0.542496	0.0345828	No_Change
ENSMUSG00000008601	Rab25	-0.0829413	0.589044	No_Change
ENSMUSG00000008604	Ubqln4	0.0487749	0.621072	No_Change
ENSMUSG00000008658	Rbfox1	-0.0110032	NA	No_Change
ENSMUSG00000008668	Rps18	-0.110497	0.0354457	No_Change
ENSMUSG00000008682	Rpl10	-0.0622104	0.292402	No_Change
ENSMUSG00000008683	Rps15a	0.0363671	0.674432	No_Change
ENSMUSG00000008686	NA	0.0431816	0.87251	No_Change
ENSMUSG00000008690	Ncaph2	0.0570587	0.513592	No_Change
ENSMUSG00000008730	Hipk1	0.0297777	0.876929	No_Change
ENSMUSG00000008734	Gprc5b	-0.751906	5.21564e-09	No_Change
ENSMUSG00000008763	Man1a2	0.41768	0.00398654	No_Change
ENSMUSG00000008813	Tppp2	-0.00799816	NA	No_Change
ENSMUSG00000008822	Acyp1	-0.0600352	0.805665	No_Change
ENSMUSG00000008855	Hdac5	-0.0403736	0.79629	No_Change
ENSMUSG00000008859	Rala	0.238495	0.0504568	No_Change
ENSMUSG00000008892	Vdac3	0.0154791	0.921752	No_Change
ENSMUSG00000008932	Slc1a7	-0.0226935	NA	No_Change
ENSMUSG00000008958	Vps72	-0.226033	0.0545633	No_Change
ENSMUSG00000008976	Gabpa	-0.305385	7.21703e-05	No_Change
ENSMUSG00000008999	Bmp7	-0.0111956	0.962154	No_Change
ENSMUSG00000009013	Dynll1	-0.102322	0.331109	No_Change
ENSMUSG00000009030	Pdcl	0.0800864	0.612604	No_Change
ENSMUSG00000009035	Tmem184b	-0.646461	4.76353e-14	No_Change
ENSMUSG00000009070	Rsph14	-0.0105975	NA	No_Change
ENSMUSG00000009073	Nf2	0.331302	6.82878e-06	No_Change
ENSMUSG00000009075	Cabp7	0.0244706	0.926211	No_Change
ENSMUSG00000009076	Zmat5	-0.00140833	0.995826	No_Change
ENSMUSG00000009079	Ewsr1	-0.104333	0.078639	No_Change
ENSMUSG00000009090	Ap1b1	-0.0471912	0.712881	No_Change
ENSMUSG00000009092	Derl3	-0.0791821	0.686346	No_Change
ENSMUSG00000009093	Gstt4	-0.0110032	NA	No_Change
ENSMUSG00000009097	Tbx1	-0.0312767	0.876929	No_Change
ENSMUSG00000009108	Gnat2	-0.0137091	NA	No_Change
ENSMUSG00000009112	Bcl2l13	-0.104716	0.300438	No_Change
ENSMUSG00000009114	2610028H24Rik	-0.0110032	NA	No_Change
ENSMUSG00000009115	Spatc1l	-0.00556722	NA	No_Change
ENSMUSG00000009145	Dqx1	-0.0618119	0.744785	No_Change
ENSMUSG00000009207	Lnpk	0.206629	0.196229	No_Change
ENSMUSG00000009216	Fam163b	0.081211	0.662986	No_Change
ENSMUSG00000009246	Trpm5	0.0065179	NA	No_Change
ENSMUSG00000009248	Ascl2	0.114816	0.603928	No_Change
ENSMUSG00000009291	Pttg1ip	-0.61376	1.04931e-09	No_Change
ENSMUSG00000009292	Trpm2	-0.0214447	NA	No_Change
ENSMUSG00000009293	Ube2g2	-0.482746	0.000444304	No_Change
ENSMUSG00000009376	Met	0.0542917	0.834729	No_Change
ENSMUSG00000009378	Slc16a12	0.00432137	NA	No_Change
ENSMUSG00000009394	Syn2	0.17625	NA	No_Change
ENSMUSG00000009406	Elk1	-0.133501	0.415573	No_Change
ENSMUSG00000009418	Nav1	-0.506676	1.90186e-07	No_Change
ENSMUSG00000009470	Tnpo1	0.181807	0.000837436	No_Change
ENSMUSG00000009471	Myod1	-0.0636074	NA	No_Change
ENSMUSG00000009487	Otog	-0.0797702	0.547116	No_Change
ENSMUSG00000009535	Rnmt	-0.173513	0.127296	No_Change
ENSMUSG00000009545	Kcnq1	-0.131674	0.368402	No_Change
ENSMUSG00000009549	Srp14	-0.240096	0.0403088	No_Change
ENSMUSG00000009555	Cdk9	-0.507521	7.7771e-10	No_Change
ENSMUSG00000009563	Tor2a	0.148693	0.354652	No_Change
ENSMUSG00000009566	Fpgs	-0.404102	0.000233185	No_Change
ENSMUSG00000009569	Mrtfb	0.20367	0.19688	No_Change
ENSMUSG00000009575	Cbx5	0.319822	2.70342e-10	No_Change
ENSMUSG00000009585	Apobec3	-0.911544	6.2284e-20	No_Change
ENSMUSG00000009588	St6galnac1	0.00630159	NA	No_Change
ENSMUSG00000009596	Taf7l	-0.0950631	0.69409	No_Change
ENSMUSG00000009621	Vav2	-0.487907	3.72143e-05	No_Change
ENSMUSG00000009628	Tex15	0.922291	5.53916e-10	No_Change
ENSMUSG00000009630	Ppp2cb	0.015014	0.921752	No_Change
ENSMUSG00000009633	G0s2	0.180722	0.409249	No_Change
ENSMUSG00000009640	Dmap1	-0.165489	0.314358	No_Change
ENSMUSG00000009646	Pla2g12b	-0.0629162	NA	No_Change
ENSMUSG00000009647	Mcu	0.284236	0.0527588	No_Change
ENSMUSG00000009670	Tex11	0.825256	0.00230108	No_Change
ENSMUSG00000009681	Bcr	-0.0922312	0.561227	No_Change
ENSMUSG00000009687	Fxyd5	-0.114572	0.528749	No_Change
ENSMUSG00000009731	Kcnd1	-0.143614	0.513442	No_Change
ENSMUSG00000009733	Tfcp2	0.106184	0.540617	No_Change
ENSMUSG00000009734	Pou6f2	-0.00175141	NA	No_Change
ENSMUSG00000009739	Pou6f1	0.885585	0.000122207	No_Change
ENSMUSG00000009741	Ubp1	-0.0408363	0.811097	No_Change
ENSMUSG00000009772	Nuak2	-1.10086	7.63604e-05	KO_down
ENSMUSG00000009828	Cilk1	0.223978	0.252187	No_Change
ENSMUSG00000009863	Sdhb	-0.318687	0.000311909	No_Change
ENSMUSG00000009876	Cox4i2	-1.18322	0.0150071	KO_down
ENSMUSG00000009894	Snap47	-0.0832499	0.610908	No_Change
ENSMUSG00000009900	Wnt3a	-0.170126	0.113893	No_Change
ENSMUSG00000009905	Kdsr	0.213775	0.159527	No_Change
ENSMUSG00000009907	Vps4b	0.0341826	0.823496	No_Change
ENSMUSG00000009927	Rps25	0.0869646	0.112406	No_Change
ENSMUSG00000009941	Nxf2	0.847414	0.0422251	No_Change
ENSMUSG00000009995	Taz	-0.115943	0.562604	No_Change
ENSMUSG00000010021	Kif19a	-1.3564	0.000186957	KO_down
ENSMUSG00000010025	Aldh3a2	0.255834	0.074221	No_Change
ENSMUSG00000010044	Zmynd10	-0.00667424	NA	No_Change
ENSMUSG00000010045	Tmem115	0.0145504	0.960611	No_Change
ENSMUSG00000010047	Hyal2	-0.23406	0.291377	No_Change
ENSMUSG00000010048	Ifrd2	-0.0116844	0.960611	No_Change
ENSMUSG00000010051	Hyal1	-0.844715	0.0179502	No_Change
ENSMUSG00000010054	Tusc2	-0.352727	0.118943	No_Change
ENSMUSG00000010057	Nprl2	-0.171163	0.43535	No_Change
ENSMUSG00000010064	Slc38a3	-0.746719	0.00737912	No_Change
ENSMUSG00000010066	Cacna2d2	0.114166	0.632386	No_Change
ENSMUSG00000010067	Rassf1	-0.23141	0.308013	No_Change
ENSMUSG00000010080	Epn3	5.77798	0.00117596	KO_up
ENSMUSG00000010086	Rnf112	-0.0270391	NA	No_Change
ENSMUSG00000010095	Slc3a2	0.186712	0.0030714	No_Change
ENSMUSG00000010097	Nxf1	0.10621	0.412122	No_Change
ENSMUSG00000010110	Stx5a	0.289326	0.108904	No_Change
ENSMUSG00000010122	Slc47a1	0.186957	0.328986	No_Change
ENSMUSG00000010136	Pifo	-0.00844437	NA	No_Change
ENSMUSG00000010142	Tnfrsf13b	0.119197	0.311177	No_Change
ENSMUSG00000010154	Spire2	-0.596212	1.358e-06	No_Change
ENSMUSG00000010175	Prox1	0.0796034	0.752294	No_Change
ENSMUSG00000010205	Raver1	-0.0338922	0.753967	No_Change
ENSMUSG00000010277	2610507B11Rik	0.0724991	0.250431	No_Change
ENSMUSG00000010290	AI597479	0.10019	0.595187	No_Change
ENSMUSG00000010307	Tmem86a	-0.00753794	0.979559	No_Change
ENSMUSG00000010311	Optc	-0.0212699	NA	No_Change
ENSMUSG00000010342	Tex14	-0.141744	0.335174	No_Change
ENSMUSG00000010358	Ifi35	-0.0976128	0.498078	No_Change
ENSMUSG00000010362	Rdm1	0.019133	0.936857	No_Change
ENSMUSG00000010376	Nedd8	-0.157665	0.178811	No_Change
ENSMUSG00000010392	Gosr1	0.0846846	0.672558	No_Change
ENSMUSG00000010406	Mrpl52	-0.285384	0.0603317	No_Change
ENSMUSG00000010453	Kansl3	-0.346766	0.000668256	No_Change
ENSMUSG00000010461	Eya4	-0.0796723	NA	No_Change
ENSMUSG00000010476	Ebf3	-0.191431	0.299674	No_Change
ENSMUSG00000010492	Uckl1os	-0.00781715	NA	No_Change
ENSMUSG00000010505	Myt1	-0.0144924	NA	No_Change
ENSMUSG00000010517	Faf1	0.133869	0.15169	No_Change
ENSMUSG00000010529	Gm266	0.0483156	NA	No_Change
ENSMUSG00000010538	Tsacc	-0.011996	0.943591	No_Change
ENSMUSG00000010554	Mettl16	0.0319075	0.832262	No_Change
ENSMUSG00000010592	Dazl	-0.712212	6.3674e-22	No_Change
ENSMUSG00000010601	Apol7a	-0.00793017	NA	No_Change
ENSMUSG00000010607	Pigyl	-0.389585	0.0380873	No_Change
ENSMUSG00000010608	Rbm25	-0.139086	0.0272755	No_Change
ENSMUSG00000010609	Psen2	0.35087	0.108027	No_Change
ENSMUSG00000010651	Acaa1b	-0.445958	0.0475103	No_Change
ENSMUSG00000010660	Plcd1	-0.915491	1.63394e-14	No_Change
ENSMUSG00000010663	Fads1	-0.476953	1.24948e-08	No_Change
ENSMUSG00000010721	Lmbr1	0.199587	0.379418	No_Change
ENSMUSG00000010751	Tnfrsf22	0.248548	0.245581	No_Change
ENSMUSG00000010755	Cars	0.261254	5.52636e-05	No_Change
ENSMUSG00000010760	Phlda2	-0.263783	0.0920697	No_Change
ENSMUSG00000010796	Asz1	0.200479	0.32447	No_Change
ENSMUSG00000010797	Wnt2	-0.00793017	NA	No_Change
ENSMUSG00000010803	Gabra1	0.0234792	NA	No_Change
ENSMUSG00000010825	Grid2ip	0.0417419	0.806724	No_Change
ENSMUSG00000010830	Kdelr3	-0.654917	3.69338e-05	No_Change
ENSMUSG00000010911	Apip	0.345044	0.091441	No_Change
ENSMUSG00000010914	Pdhx	-0.154188	0.432673	No_Change
ENSMUSG00000010936	Vac14	0.297544	0.00286218	No_Change
ENSMUSG00000011008	Mcoln2	0.00951948	NA	No_Change
ENSMUSG00000011034	Slc5a1	0.00445687	NA	No_Change
ENSMUSG00000011096	Akt1s1	0.306543	0.0708156	No_Change
ENSMUSG00000011114	Tbrg1	0.0728976	0.480686	No_Change
ENSMUSG00000011148	Adssl1	-0.300453	0.101237	No_Change
ENSMUSG00000011154	Cfap161	-0.0472572	0.706249	No_Change
ENSMUSG00000011158	Brf1	0.0228839	0.931793	No_Change
ENSMUSG00000011171	Vipr2	-0.0118576	NA	No_Change
ENSMUSG00000011179	Odc1	0.0378651	0.629436	No_Change
ENSMUSG00000011254	Thg1l	0.379953	0.0208157	No_Change
ENSMUSG00000011256	Adam19	-0.0812353	0.435002	No_Change
ENSMUSG00000011257	Pabpc4	0.30185	1.35319e-10	No_Change
ENSMUSG00000011263	Exoc3l2	-0.080623	0.564844	No_Change
ENSMUSG00000011267	Zfp296	-0.546916	0.00992889	No_Change
ENSMUSG00000011305	Plin5	-0.289081	0.203066	No_Change
ENSMUSG00000011306	Sugp1	-0.0858618	0.566939	No_Change
ENSMUSG00000011349	Dmrtc2	0.0332965	0.897784	No_Change
ENSMUSG00000011382	Dhdh	-0.0490115	0.822514	No_Change
ENSMUSG00000011427	Zfp790	0.0438722	0.871643	No_Change
ENSMUSG00000011463	Cpb1	0.0870482	NA	No_Change
ENSMUSG00000011486	Slc25a41	0.00634512	NA	No_Change
ENSMUSG00000011589	Fsd1	-0.627943	0.00027271	No_Change
ENSMUSG00000011632	Pinlyp	0.0265987	NA	No_Change
ENSMUSG00000011658	Fuz	0.188863	0.402602	No_Change
ENSMUSG00000011751	Sptbn4	-0.177237	0.239888	No_Change
ENSMUSG00000011752	Pgam1	-0.522961	1.78123e-14	No_Change
ENSMUSG00000011831	Evi5	0.0878068	0.450734	No_Change
ENSMUSG00000011832	Evi5l	0.00602263	0.984879	No_Change
ENSMUSG00000011837	Snapc2	-0.301933	0.0558908	No_Change
ENSMUSG00000011877	Git1	-0.0520785	0.674176	No_Change
ENSMUSG00000011884	Gltp	-0.466821	1.8461e-06	No_Change
ENSMUSG00000011958	Bnip2	-0.318071	0.0592942	No_Change
ENSMUSG00000011960	Ccnt1	-0.0132319	0.936269	No_Change
ENSMUSG00000012017	Scarf2	0.0952247	0.639481	No_Change
ENSMUSG00000012042	4930579F01Rik	-0.00793017	NA	No_Change
ENSMUSG00000012076	Brms1l	0.155367	0.422785	No_Change
ENSMUSG00000012114	Med15	-0.243573	0.0122175	No_Change
ENSMUSG00000012117	Dhdds	-0.015899	0.945813	No_Change
ENSMUSG00000012123	Crybg2	-0.255072	0.177142	No_Change
ENSMUSG00000012126	Ubxn11	0.0623863	0.807325	No_Change
ENSMUSG00000012187	Mogat1	0.00725035	NA	No_Change
ENSMUSG00000012211	Tex22	0.0227223	NA	No_Change
ENSMUSG00000012282	Wnt8a	0.0400501	NA	No_Change
ENSMUSG00000012296	Tjap1	-0.281241	0.0015389	No_Change
ENSMUSG00000012350	Ehf	-0.0110032	NA	No_Change
ENSMUSG00000012396	Nanog	-1.50822	4.35331e-232	KO_down
ENSMUSG00000012405	Rpl15	0.0265998	0.686446	No_Change
ENSMUSG00000012422	Tmem167	-0.0192199	0.92747	No_Change
ENSMUSG00000012428	Steap4	0.0142955	NA	No_Change
ENSMUSG00000012429	Mplkip	-0.0124398	0.965146	No_Change
ENSMUSG00000012443	Kif11	0.221069	0.00311702	No_Change
ENSMUSG00000012483	Rpa3	0.0376723	0.852076	No_Change
ENSMUSG00000012519	Mlkl	0.0193153	NA	No_Change
ENSMUSG00000012535	Tnpo3	-0.0200958	0.837998	No_Change
ENSMUSG00000012609	Ttll5	0.383264	0.00920551	No_Change
ENSMUSG00000012640	Zfp715	0.222776	0.285527	No_Change
ENSMUSG00000012705	Retn	-0.0271798	0.869945	No_Change
ENSMUSG00000012777	Acp4	-0.0354894	NA	No_Change
ENSMUSG00000012819	Cdh23	0.0329611	0.888524	No_Change
ENSMUSG00000012848	Rps5	0.0207579	0.789341	No_Change
ENSMUSG00000012889	Podnl1	0.0201612	NA	No_Change
ENSMUSG00000013033	Adgrl1	-0.151906	0.106843	No_Change
ENSMUSG00000013076	Amotl1	-0.0435226	0.839412	No_Change
ENSMUSG00000013083	2200002J24Rik	-0.00793017	NA	No_Change
ENSMUSG00000013089	Etv5	-0.0444204	0.768591	No_Change
ENSMUSG00000013091	Tmem190	0.00725035	NA	No_Change
ENSMUSG00000013150	Gfod2	-0.241714	0.26517	No_Change
ENSMUSG00000013155	Enkd1	0.161706	0.382736	No_Change
ENSMUSG00000013158	4933405L10Rik	-0.0204705	NA	No_Change
ENSMUSG00000013160	Atp6v0d1	0.472967	7.52355e-09	No_Change
ENSMUSG00000013236	Ptprs	-0.419209	1.05211e-12	No_Change
ENSMUSG00000013275	Slc41a1	-0.49067	0.00081573	No_Change
ENSMUSG00000013338	Fer1l4	0.000554363	0.998606	No_Change
ENSMUSG00000013353	4931406B18Rik	0.0265161	NA	No_Change
ENSMUSG00000013367	Iglon5	0.193193	0.401906	No_Change
ENSMUSG00000013415	Igf2bp1	0.175433	0.00265644	No_Change
ENSMUSG00000013418	B4galnt2	-0.141603	0.514899	No_Change
ENSMUSG00000013419	Zfp651	0.0653124	0.744175	No_Change
ENSMUSG00000013465	Nelfb	-0.139823	0.292015	No_Change
ENSMUSG00000013483	Card14	-0.0414622	NA	No_Change
ENSMUSG00000013495	Tmem175	0.180922	0.422781	No_Change
ENSMUSG00000013523	Bcas1	0.182035	0.430091	No_Change
ENSMUSG00000013539	Tango2	-0.0646585	0.792607	No_Change
ENSMUSG00000013584	Aldh1a2	0.118989	0.521928	No_Change
ENSMUSG00000013593	Ndufs2	-0.0637623	0.50696	No_Change
ENSMUSG00000013611	Snx31	0.0640081	0.790401	No_Change
ENSMUSG00000013622	Atraid	0.537238	0.0111403	No_Change
ENSMUSG00000013629	Cad	-0.260718	4.72331e-06	No_Change
ENSMUSG00000013646	Sh3bp5l	-0.00500659	0.980642	No_Change
ENSMUSG00000013662	Atad1	0.249299	0.0323053	No_Change
ENSMUSG00000013663	Pten	0.56343	4.11325e-10	No_Change
ENSMUSG00000013698	Pea15a	-0.198668	0.330893	No_Change
ENSMUSG00000013701	Timm23	-0.151921	0.117881	No_Change
ENSMUSG00000013707	Tnfaip8l2	0.00449174	NA	No_Change
ENSMUSG00000013736	Trnt1	0.0501055	0.759013	No_Change
ENSMUSG00000013766	Ly6g6e	-0.0231899	0.933602	No_Change
ENSMUSG00000013787	Ehmt2	-0.246334	0.00131708	No_Change
ENSMUSG00000013822	Elof1	-0.533582	0.00262882	No_Change
ENSMUSG00000013833	Med16	0.00273765	0.990936	No_Change
ENSMUSG00000013846	St3gal1	-0.350388	0.163392	No_Change
ENSMUSG00000013858	Tmem259	-0.292726	0.000626144	No_Change
ENSMUSG00000013878	Rnf170	0.51445	0.0105635	No_Change
ENSMUSG00000013921	Clip3	-0.252434	0.197716	No_Change
ENSMUSG00000013928	1700020L13Rik	0.00730657	NA	No_Change
ENSMUSG00000013936	Myl2	0.00768115	NA	No_Change
ENSMUSG00000013973	Dedd	0.113903	0.551577	No_Change
ENSMUSG00000013974	Mcemp1	0.00363016	NA	No_Change
ENSMUSG00000013989	NA	-0.0372134	0.82321	No_Change
ENSMUSG00000013997	Nit1	0.278543	0.138944	No_Change
ENSMUSG00000014030	Pax5	-0.00934225	NA	No_Change
ENSMUSG00000014039	Prdm15	-0.216937	0.208426	No_Change
ENSMUSG00000014074	Rnf168	0.472032	0.000208746	No_Change
ENSMUSG00000014075	Dynlt2b	0.0213115	0.937899	No_Change
ENSMUSG00000014077	Chp1	0.0478242	0.768058	No_Change
ENSMUSG00000014158	Trpv4	-0.300173	0.21311	No_Change
ENSMUSG00000014164	Klhl3	0.221929	0.292476	No_Change
ENSMUSG00000014177	Tvp23b	-0.113138	0.550101	No_Change
ENSMUSG00000014195	Dnajc7	0.0634135	0.526137	No_Change
ENSMUSG00000014198	Zfp385c	-1.18253	0.00195511	KO_down
ENSMUSG00000014226	Cacybp	-0.21001	0.00058789	No_Change
ENSMUSG00000014232	Cluap1	-0.0316314	0.905621	No_Change
ENSMUSG00000014243	Zswim7	0.287465	0.201227	No_Change
ENSMUSG00000014245	Pigl	0.247289	0.164271	No_Change
ENSMUSG00000014294	Ndufa2	0.117277	0.535711	No_Change
ENSMUSG00000014301	Pam16	-0.33346	0.0974253	No_Change
ENSMUSG00000014303	Glis2	-0.191843	0.258361	No_Change
ENSMUSG00000014313	Cox6c	-0.182126	0.0293483	No_Change
ENSMUSG00000014329	Bicc1	0.169123	0.449833	No_Change
ENSMUSG00000014349	Ube2z	-0.330569	7.35886e-06	No_Change
ENSMUSG00000014351	Gip	-0.00793017	NA	No_Change
ENSMUSG00000014353	Tmem87b	-0.140491	0.341108	No_Change
ENSMUSG00000014355	Anapc1	0.17675	0.0155068	No_Change
ENSMUSG00000014361	Mertk	-0.0683634	0.779844	No_Change
ENSMUSG00000014402	Tsg101	-0.162835	0.150903	No_Change
ENSMUSG00000014418	Hps5	0.125768	0.499182	No_Change
ENSMUSG00000014426	Map3k4	0.294117	0.000181391	No_Change
ENSMUSG00000014444	Piezo1	0.491917	1.55073e-12	No_Change
ENSMUSG00000014470	Rnf166	-0.506101	0.00259006	No_Change
ENSMUSG00000014496	Ankrd28	0.0600337	0.678891	No_Change
ENSMUSG00000014498	Ankrd52	-0.276415	0.0243114	No_Change
ENSMUSG00000014503	Pkd2l2	-0.00562037	NA	No_Change
ENSMUSG00000014504	Srp19	-0.105938	0.5116	No_Change
ENSMUSG00000014542	Clec4f	0.00768115	NA	No_Change
ENSMUSG00000014547	Wdfy2	0.134506	0.567689	No_Change
ENSMUSG00000014550	Rbsn	-0.0107203	0.960757	No_Change
ENSMUSG00000014551	Mrps25	-0.0996475	0.54799	No_Change
ENSMUSG00000014554	Dguok	0.404986	0.0590855	No_Change
ENSMUSG00000014592	Camta1	-0.537375	0.000213075	No_Change
ENSMUSG00000014599	Csf1	0.134247	NA	No_Change
ENSMUSG00000014601	Strip1	0.08701	0.57238	No_Change
ENSMUSG00000014602	Kif1a	-0.323524	0.0757755	No_Change
ENSMUSG00000014606	Slc25a11	0.163891	0.315196	No_Change
ENSMUSG00000014609	Chrne	-0.00173928	NA	No_Change
ENSMUSG00000014633	Cmc2	-0.00310626	0.990936	No_Change
ENSMUSG00000014668	Chfr	0.0695766	0.608054	No_Change
ENSMUSG00000014686	Ceacam16	-0.0482551	0.739148	No_Change
ENSMUSG00000014704	Hoxa2	0.0196522	NA	No_Change
ENSMUSG00000014748	Tex261	-0.336912	0.0150811	No_Change
ENSMUSG00000014763	Fam120b	0.559206	0.0232222	No_Change
ENSMUSG00000014767	Tbp	-0.0486606	0.803034	No_Change
ENSMUSG00000014769	Psmb1	-0.0174252	0.87373	No_Change
ENSMUSG00000014771	Pdcd2	0.0272461	0.902734	No_Change
ENSMUSG00000014773	Dll1	-0.00428987	0.987167	No_Change
ENSMUSG00000014776	Nol3	-0.0634516	0.802123	No_Change
ENSMUSG00000014778	Fhod1	-0.0169549	0.940265	No_Change
ENSMUSG00000014782	Plekhg4	0.107509	0.645267	No_Change
ENSMUSG00000014786	Slc9a5	0.221531	0.153347	No_Change
ENSMUSG00000014791	Elmo3	0.0717964	0.777759	No_Change
ENSMUSG00000014813	Stc1	-0.182449	0.264298	No_Change
ENSMUSG00000014837	4931428F04Rik	0.118859	0.608102	No_Change
ENSMUSG00000014846	Tppp3	-0.107427	0.635075	No_Change
ENSMUSG00000014850	Msh3	0.34735	0.0216846	No_Change
ENSMUSG00000014852	Adamts13	0.00725035	NA	No_Change
ENSMUSG00000014856	Tmem208	-0.190928	0.378336	No_Change
ENSMUSG00000014859	E2f4	-0.489703	9.04562e-09	No_Change
ENSMUSG00000014867	Surf4	-0.240916	0.00579693	No_Change
ENSMUSG00000014873	Surf2	0.369086	0.0286358	No_Change
ENSMUSG00000014905	Dnajb9	-0.0382676	0.886049	No_Change
ENSMUSG00000014907	Naf1	0.16081	0.250431	No_Change
ENSMUSG00000014932	Yes1	0.329202	0.00728377	No_Change
ENSMUSG00000014956	Ppp1cb	0.0786574	0.346547	No_Change
ENSMUSG00000014959	Gorasp2	-0.0743693	0.573188	No_Change
ENSMUSG00000014980	Tsen15	-0.252652	0.226157	No_Change
ENSMUSG00000015001	Oc90	-0.00799816	NA	No_Change
ENSMUSG00000015002	Efr3a	0.213857	0.0277799	No_Change
ENSMUSG00000015013	Trappc2l	0.273996	0.156373	No_Change
ENSMUSG00000015016	Acsf3	0.236333	0.228719	No_Change
ENSMUSG00000015023	Ddx19a	-0.068481	0.61318	No_Change
ENSMUSG00000015027	Galns	0.644189	0.000957584	No_Change
ENSMUSG00000015053	Gata2	0.805252	0.00377253	No_Change
ENSMUSG00000015083	C8g	-0.0647625	0.646699	No_Change
ENSMUSG00000015085	Entpd2	-0.215151	0.339809	No_Change
ENSMUSG00000015087	Rabl6	-0.109285	0.279138	No_Change
ENSMUSG00000015090	Ptgds	0.0166345	NA	No_Change
ENSMUSG00000015092	Edf1	-0.0577968	0.661143	No_Change
ENSMUSG00000015093	Clic3	-0.0203195	NA	No_Change
ENSMUSG00000015094	Npdc1	-0.201226	0.241735	No_Change
ENSMUSG00000015095	Fbxw5	0.189887	0.299127	No_Change
ENSMUSG00000015112	Slc25a13	-0.512773	6.74499e-15	No_Change
ENSMUSG00000015120	Ube2i	0.00985387	0.933946	No_Change
ENSMUSG00000015126	Tsr3	-0.169143	0.384695	No_Change
ENSMUSG00000015127	Unkl	-0.11107	0.636273	No_Change
ENSMUSG00000015133	Lrrk1	0.167373	0.423139	No_Change
ENSMUSG00000015134	Aldh1a3	-0.138058	NA	No_Change
ENSMUSG00000015143	Actn1	0.0483769	0.45926	No_Change
ENSMUSG00000015149	Sirt2	0.56444	0.000113138	No_Change
ENSMUSG00000015165	Hnrnpl	-0.0576202	0.294222	No_Change
ENSMUSG00000015176	Nolc1	-0.199689	0.00114216	No_Change
ENSMUSG00000015189	Casd1	0.370222	0.117751	No_Change
ENSMUSG00000015202	Cnksr3	0.108045	0.589555	No_Change
ENSMUSG00000015214	Mtmr1	0.400329	0.0657893	No_Change
ENSMUSG00000015217	Hmgb3	0.52256	0.00334803	No_Change
ENSMUSG00000015222	Map2	0.0379156	0.889082	No_Change
ENSMUSG00000015224	Cyp2j9	-0.0095031	NA	No_Change
ENSMUSG00000015243	Abca1	0.827494	0.000219823	No_Change
ENSMUSG00000015247	Nipsnap3b	0.0775715	0.721353	No_Change
ENSMUSG00000015289	Lage3	-0.173927	0.39152	No_Change
ENSMUSG00000015290	Ubl4a	-0.0726708	0.746484	No_Change
ENSMUSG00000015291	Gdi1	0.0297954	0.81983	No_Change
ENSMUSG00000015305	Sash1	-0.279658	0.0165472	No_Change
ENSMUSG00000015312	Gadd45b	-0.14109	0.294222	No_Change
ENSMUSG00000015314	Slamf6	-0.0187114	NA	No_Change
ENSMUSG00000015335	Zdhhc12	-0.362501	0.00850068	No_Change
ENSMUSG00000015337	Endog	-0.0451191	0.864835	No_Change
ENSMUSG00000015340	Cybb	-0.148964	0.203329	No_Change
ENSMUSG00000015341	Golga7	-0.180137	0.0666476	No_Change
ENSMUSG00000015342	Xk	-0.211781	0.357109	No_Change
ENSMUSG00000015354	Pcolce2	-1.30653	0.000105471	KO_down
ENSMUSG00000015357	Clpx	0.00184221	0.994369	No_Change
ENSMUSG00000015363	Trabd	-0.254982	0.0845776	No_Change
ENSMUSG00000015365	Mov10l1	-0.297452	0.0948301	No_Change
ENSMUSG00000015377	Dennd6b	-0.0152864	0.956012	No_Change
ENSMUSG00000015396	Cd83	-0.0121296	NA	No_Change
ENSMUSG00000015451	C4a	0.125905	0.448527	No_Change
ENSMUSG00000015452	Ager	0.0373522	0.821686	No_Change
ENSMUSG00000015461	Atf6b	-0.12103	0.502758	No_Change
ENSMUSG00000015467	Egfl8	0.0159615	NA	No_Change
ENSMUSG00000015468	Notch4	-2.7653	1.70422e-12	KO_down
ENSMUSG00000015474	Ppt2	-0.185411	0.408585	No_Change
ENSMUSG00000015476	Prrt1	-0.0127625	NA	No_Change
ENSMUSG00000015478	Rnf5	-0.227609	0.1746	No_Change
ENSMUSG00000015484	Fam163a	0.00679245	NA	No_Change
ENSMUSG00000015488	Cacfd1	0.0855148	0.72716	No_Change
ENSMUSG00000015501	Hivep2	0.0286014	0.906564	No_Change
ENSMUSG00000015522	Arnt	-0.124668	0.131428	No_Change
ENSMUSG00000015533	Itga2	0.0093265	NA	No_Change
ENSMUSG00000015536	Mocs2	0.180119	0.403744	No_Change
ENSMUSG00000015542	Nat9	-0.361646	0.123856	No_Change
ENSMUSG00000015568	Lpl	1.11708	3.25561e-14	KO_up
ENSMUSG00000015575	Atp6v0e	-0.0209737	0.924101	No_Change
ENSMUSG00000015579	Nkx2-5	-0.0637313	NA	No_Change
ENSMUSG00000015597	Zfp318	0.980491	1.52014e-20	No_Change
ENSMUSG00000015599	Ttbk1	-0.00367815	0.980409	No_Change
ENSMUSG00000015605	Srf	-0.103426	0.559249	No_Change
ENSMUSG00000015619	Gata3	0.0511029	0.794975	No_Change
ENSMUSG00000015627	Gata5	0.0047223	NA	No_Change
ENSMUSG00000015647	Lama5	-0.133372	0.116685	No_Change
ENSMUSG00000015652	Steap1	0.274486	0.242562	No_Change
ENSMUSG00000015653	Steap2	0.274471	0.184879	No_Change
ENSMUSG00000015656	Hspa8	-0.0946572	0.00291182	No_Change
ENSMUSG00000015659	Serac1	0.169362	0.292661	No_Change
ENSMUSG00000015668	Pdzd11	0.116549	0.575808	No_Change
ENSMUSG00000015671	Psma2	-0.179644	0.0191488	No_Change
ENSMUSG00000015672	Mrpl32	-0.139425	0.430813	No_Change
ENSMUSG00000015697	Setdb1	0.297198	0.00065104	No_Change
ENSMUSG00000015702	Anxa9	0.0591928	NA	No_Change
ENSMUSG00000015709	Arnt2	0.0907397	0.709334	No_Change
ENSMUSG00000015711	Prune1	-0.100052	0.402602	No_Change
ENSMUSG00000015714	Cers2	0.247967	0.0857689	No_Change
ENSMUSG00000015721	Nlrp5	-0.0110032	NA	No_Change
ENSMUSG00000015733	Capza2	0.049033	0.635388	No_Change
ENSMUSG00000015745	Plekho1	0.180392	0.429936	No_Change
ENSMUSG00000015747	Vps45	0.192848	0.350595	No_Change
ENSMUSG00000015748	Prpf3	-0.129098	0.331919	No_Change
ENSMUSG00000015749	Anp32e	0.114004	0.202263	No_Change
ENSMUSG00000015750	Aph1a	-0.106305	0.616279	No_Change
ENSMUSG00000015755	Tab2	0.12045	0.29749	No_Change
ENSMUSG00000015757	Ppil4	0.0532917	0.760513	No_Change
ENSMUSG00000015759	Cnih1	0.143007	0.273629	No_Change
ENSMUSG00000015766	Eps8	0.174778	0.314538	No_Change
ENSMUSG00000015776	Med22	-0.0291706	0.907503	No_Change
ENSMUSG00000015787	Abo	0.0176958	NA	No_Change
ENSMUSG00000015790	Surf1	0.129664	0.535522	No_Change
ENSMUSG00000015804	Med28	-0.0120624	0.95714	No_Change
ENSMUSG00000015806	Qdpr	-0.17676	0.161309	No_Change
ENSMUSG00000015812	Gnrh1	-0.0122544	NA	No_Change
ENSMUSG00000015837	Sqstm1	-0.654531	3.78272e-25	No_Change
ENSMUSG00000015839	Nfe2l2	-0.202185	0.0685093	No_Change
ENSMUSG00000015843	Rxrg	-0.00596682	NA	No_Change
ENSMUSG00000015846	Rxra	0.200167	0.341986	No_Change
ENSMUSG00000015850	Adamtsl4	-0.334714	0.155703	No_Change
ENSMUSG00000015869	Prpsap1	-0.0684469	0.615468	No_Change
ENSMUSG00000015879	Fam184b	-0.0214447	NA	No_Change
ENSMUSG00000015880	Ncapg	0.177113	0.0472529	No_Change
ENSMUSG00000015882	Lcorl	0.595981	0.000678037	No_Change
ENSMUSG00000015889	Lta4h	0.0403263	0.80416	No_Change
ENSMUSG00000015890	Amdhd1	-0.0465564	NA	No_Change
ENSMUSG00000015932	Dstn	-0.0924266	0.304064	No_Change
ENSMUSG00000015937	Macroh2a1	-0.51017	5.61622e-18	No_Change
ENSMUSG00000015942	Gtf2ird2	0.195147	0.29875	No_Change
ENSMUSG00000015943	Bola1	0.285919	0.208031	No_Change
ENSMUSG00000015944	Castor2	-0.189316	0.295334	No_Change
ENSMUSG00000015950	Ncf1	-1.26515	0.020374	KO_down
ENSMUSG00000015957	Wnt11	-0.156506	0.197201	No_Change
ENSMUSG00000015961	Adss	0.0412324	0.748328	No_Change
ENSMUSG00000015966	Il17rb	0.0501706	NA	No_Change
ENSMUSG00000015968	Cacna1d	0.0736041	0.565564	No_Change
ENSMUSG00000015970	Chdh	0.117441	NA	No_Change
ENSMUSG00000015971	Actr8	-0.0302442	0.872286	No_Change
ENSMUSG00000015980	Lrrc27	0.249394	0.223294	No_Change
ENSMUSG00000015981	Stk32c	-0.00277843	0.988734	No_Change
ENSMUSG00000015994	Fnta	-0.00618164	0.969047	No_Change
ENSMUSG00000016018	Mtrex	0.13289	0.130504	No_Change
ENSMUSG00000016024	Lbp	0.019179	NA	No_Change
ENSMUSG00000016028	Celsr1	0.240311	0.0710203	No_Change
ENSMUSG00000016087	Fli1	-0.00175141	NA	No_Change
ENSMUSG00000016128	Stard13	-0.0578624	0.814441	No_Change
ENSMUSG00000016150	Tenm1	-0.0025501	NA	No_Change
ENSMUSG00000016181	Utp25	-0.0984545	0.610604	No_Change
ENSMUSG00000016200	Syt14	0.036197	0.893496	No_Change
ENSMUSG00000016206	H2-M3	-0.105864	0.584266	No_Change
ENSMUSG00000016239	Lonrf3	0.840158	0.00474427	No_Change
ENSMUSG00000016252	Atp5e	-0.208952	0.134822	No_Change
ENSMUSG00000016253	Nelfcd	0.042481	0.773134	No_Change
ENSMUSG00000016255	Tubb1	-0.0334952	NA	No_Change
ENSMUSG00000016256	Ctsz	-0.0738247	0.528992	No_Change
ENSMUSG00000016257	Prelid3b	-0.208205	0.0995304	No_Change
ENSMUSG00000016262	Sertad4	-0.290311	0.220613	No_Change
ENSMUSG00000016308	Ube2a	-0.164117	0.318586	No_Change
ENSMUSG00000016319	Slc25a5	-0.736258	1.94932e-63	No_Change
ENSMUSG00000016344	Ppdpf	-0.278383	0.0702601	No_Change
ENSMUSG00000016346	Kcnq2	-1.0886	0.00580016	KO_down
ENSMUSG00000016349	Eef1a2	-0.0857997	0.625977	No_Change
ENSMUSG00000016356	Col20a1	-0.153253	0.464568	No_Change
ENSMUSG00000016382	Pls3	-0.139321	0.388682	No_Change
ENSMUSG00000016386	Mpped2	0.163842	0.465415	No_Change
ENSMUSG00000016409	Nkap	0.130386	0.481947	No_Change
ENSMUSG00000016427	Ndufa1	-0.071661	0.715429	No_Change
ENSMUSG00000016458	Wt1	0.0485568	NA	No_Change
ENSMUSG00000016477	E2f3	0.34801	0.0808392	No_Change
ENSMUSG00000016481	Cr1l	0.276254	0.238965	No_Change
ENSMUSG00000016487	Ppfibp1	-0.233779	0.0141066	No_Change
ENSMUSG00000016493	Cd46	0.00725035	NA	No_Change
ENSMUSG00000016494	Cd34	-0.185163	0.161436	No_Change
ENSMUSG00000016495	Plgrkt	-0.171758	0.449296	No_Change
ENSMUSG00000016496	Cd274	0.0301081	NA	No_Change
ENSMUSG00000016503	Gtf3a	-0.162111	0.197869	No_Change
ENSMUSG00000016510	Mtif3	0.311864	0.144632	No_Change
ENSMUSG00000016520	Lnx2	-0.0615943	0.802843	No_Change
ENSMUSG00000016526	Dyrk3	-0.55628	0.000329282	No_Change
ENSMUSG00000016528	Mapkapk2	-0.251044	0.0930148	No_Change
ENSMUSG00000016534	Lamp2	0.255171	0.0106228	No_Change
ENSMUSG00000016541	Atxn10	0.328207	9.82296e-10	No_Change
ENSMUSG00000016552	Foxred2	0.429993	0.0267328	No_Change
ENSMUSG00000016554	Eif3d	-0.0486336	0.503246	No_Change
ENSMUSG00000016559	H3f3b	0.474648	3.04119e-30	No_Change
ENSMUSG00000016619	Nup50	0.120217	0.262262	No_Change
ENSMUSG00000016624	Phf21b	-0.0878953	0.719424	No_Change
ENSMUSG00000016626	Nlrp14	0.0909767	0.672089	No_Change
ENSMUSG00000016637	Ift27	-0.0092263	0.976182	No_Change
ENSMUSG00000016664	Pacsin2	-0.175008	0.111206	No_Change
ENSMUSG00000016756	Cmah	0.00659473	NA	No_Change
ENSMUSG00000016757	Ttll12	-0.035632	0.835189	No_Change
ENSMUSG00000016758	Bik	-0.00197079	0.993563	No_Change
ENSMUSG00000016763	Scube1	-0.21513	0.323494	No_Change
ENSMUSG00000016831	Tox4	-0.240808	0.00169901	No_Change
ENSMUSG00000016833	Mrps18c	0.0255689	0.921512	No_Change
ENSMUSG00000016918	Sulf1	0.901238	0.0022614	No_Change
ENSMUSG00000016921	Srsf6	-0.0286063	0.788321	No_Change
ENSMUSG00000016933	Plcg1	-0.272559	0.000706726	No_Change
ENSMUSG00000016940	Kctd2	0.0285889	0.906466	No_Change
ENSMUSG00000016942	Tmprss6	-0.00158188	NA	No_Change
ENSMUSG00000016946	Kctd5	-0.389192	0.00192972	No_Change
ENSMUSG00000016982	Pom121l2	0.000547033	NA	No_Change
ENSMUSG00000016984	Etaa1	-0.176616	0.26044	No_Change
ENSMUSG00000016995	Matn4	0.122053	0.314816	No_Change
ENSMUSG00000017004	Svs5	0.00768115	NA	No_Change
ENSMUSG00000017009	Sdc4	0.0540296	0.589131	No_Change
ENSMUSG00000017057	Il13ra1	0.108723	0.634722	No_Change
ENSMUSG00000017064	Prl5a1	-0.00799816	NA	No_Change
ENSMUSG00000017119	Nbr1	0.195035	0.00378836	No_Change
ENSMUSG00000017132	Cyth1	-0.189038	0.397076	No_Change
ENSMUSG00000017144	Rnd3	-0.236189	0.298206	No_Change
ENSMUSG00000017146	Brca1	-0.368254	3.83239e-08	No_Change
ENSMUSG00000017167	Cntnap1	-0.0093848	0.949583	No_Change
ENSMUSG00000017176	Nt5c3b	0.135797	0.472458	No_Change
ENSMUSG00000017188	Coa3	0.382031	0.0646844	No_Change
ENSMUSG00000017195	Zpbp2	-0.0155336	NA	No_Change
ENSMUSG00000017204	Gsdma	0.0248119	NA	No_Change
ENSMUSG00000017210	Med24	-0.0648763	0.597174	No_Change
ENSMUSG00000017221	Psmd3	-0.370004	1.95384e-13	No_Change
ENSMUSG00000017264	Exosc10	0.0562011	0.675426	No_Change
ENSMUSG00000017286	Glod4	0.141195	0.362328	No_Change
ENSMUSG00000017288	Vps53	0.475432	0.00249586	No_Change
ENSMUSG00000017291	Taok1	0.300852	0.000886896	No_Change
ENSMUSG00000017299	Dnttip1	0.121579	0.533936	No_Change
ENSMUSG00000017300	Tnnc2	-0.0559053	NA	No_Change
ENSMUSG00000017307	Acot8	-0.353485	0.10596	No_Change
ENSMUSG00000017309	Cd300lg	0.0679083	NA	No_Change
ENSMUSG00000017311	Pyy	-0.106781	NA	No_Change
ENSMUSG00000017314	Mpp2	-0.803147	6.30396e-07	No_Change
ENSMUSG00000017376	Nlk	0.39114	0.000289748	No_Change
ENSMUSG00000017386	Traf4	-0.578186	2.57087e-09	No_Change
ENSMUSG00000017390	Aldoc	-1.01755	1.39123e-19	KO_down
ENSMUSG00000017400	Stac2	-0.903864	3.93118e-14	No_Change
ENSMUSG00000017404	Rpl19	-0.0558139	0.197104	No_Change
ENSMUSG00000017405	Nek8	-2.90765e-06	0.999981	No_Change
ENSMUSG00000017412	Cacnb4	0.000484701	NA	No_Change
ENSMUSG00000017417	Plxdc1	0.500015	0.00881268	No_Change
ENSMUSG00000017418	Arl5b	0.111911	0.448069	No_Change
ENSMUSG00000017421	Zfp207	-0.0140913	0.906096	No_Change
ENSMUSG00000017428	Psmd11	-0.154726	0.0341643	No_Change
ENSMUSG00000017446	C1qtnf1	0.0186143	NA	No_Change
ENSMUSG00000017453	Pipox	0.263805	0.0504146	No_Change
ENSMUSG00000017466	Timp2	-0.395301	0.110095	No_Change
ENSMUSG00000017478	Zc3h18	-0.129075	0.130571	No_Change
ENSMUSG00000017485	Top2b	0.204238	0.0318492	No_Change
ENSMUSG00000017491	Rarb	2.9577	7.79659e-05	KO_up
ENSMUSG00000017493	Igfbp4	-2.50687	5.80105e-29	KO_down
ENSMUSG00000017499	Cdc6	-0.703476	3.03096e-11	No_Change
ENSMUSG00000017548	Suz12	0.102077	0.122414	No_Change
ENSMUSG00000017550	Atad5	-0.10895	0.34593	No_Change
ENSMUSG00000017561	Crlf3	-0.354191	0.0045838	No_Change
ENSMUSG00000017588	Krt27	-0.0010111	NA	No_Change
ENSMUSG00000017607	Tns4	-0.381036	0.12287	No_Change
ENSMUSG00000017615	Tnfaip1	-0.166644	0.202569	No_Change
ENSMUSG00000017631	Abr	-0.151567	0.280072	No_Change
ENSMUSG00000017639	Rab11fip4	0.00306466	0.984622	No_Change
ENSMUSG00000017652	Cd40	-0.670119	0.0557784	No_Change
ENSMUSG00000017664	Slc35c2	-0.125748	0.424027	No_Change
ENSMUSG00000017667	Zfp334	0.213603	0.35526	No_Change
ENSMUSG00000017670	Elmo2	-0.229016	0.0309831	No_Change
ENSMUSG00000017677	Wsb1	-0.0303066	0.857146	No_Change
ENSMUSG00000017679	Ttpal	0.184866	0.412062	No_Change
ENSMUSG00000017686	Rhot1	-0.180879	0.0799949	No_Change
ENSMUSG00000017692	Rhbdl3	-0.0176648	0.941833	No_Change
ENSMUSG00000017697	Ada	0.432222	0.0603563	No_Change
ENSMUSG00000017707	Serinc3	-0.06104	0.581085	No_Change
ENSMUSG00000017713	Tha1	0.0144851	0.934947	No_Change
ENSMUSG00000017715	Pgs1	-0.63556	2.31111e-09	No_Change
ENSMUSG00000017716	Birc5	-0.0668802	0.595374	No_Change
ENSMUSG00000017718	Afmid	-0.110069	0.617056	No_Change
ENSMUSG00000017721	Pigt	0.00507036	0.978381	No_Change
ENSMUSG00000017723	Wfdc2	-1.02888	2.55511e-19	KO_down
ENSMUSG00000017724	Etv4	-2.7344	2.44211e-27	KO_down
ENSMUSG00000017734	Dbndd2	-0.0804107	0.533051	No_Change
ENSMUSG00000017737	Mmp9	-0.0132012	0.952282	No_Change
ENSMUSG00000017740	Slc12a5	0.0293149	0.889926	No_Change
ENSMUSG00000017747	Ghdc	-0.181649	0.334687	No_Change
ENSMUSG00000017754	Pltp	-0.0557325	0.72716	No_Change
ENSMUSG00000017756	Slc12a7	-0.555142	8.43417e-22	No_Change
ENSMUSG00000017760	Ctsa	0.360257	1.78458e-05	No_Change
ENSMUSG00000017764	Zswim1	-0.653925	1.06468e-11	No_Change
ENSMUSG00000017765	Slc12a4	-0.602799	1.68214e-08	No_Change
ENSMUSG00000017767	Spata25	0.0272303	NA	No_Change
ENSMUSG00000017774	Myo1c	-0.188001	0.106426	No_Change
ENSMUSG00000017776	Crk	-0.0102508	0.94624	No_Change
ENSMUSG00000017778	Cox7c	-0.165595	0.0282911	No_Change
ENSMUSG00000017781	Pitpna	0.0647841	0.696127	No_Change
ENSMUSG00000017801	Mlx	-0.329584	0.0651746	No_Change
ENSMUSG00000017802	Retreg3	-0.272191	0.0570475	No_Change
ENSMUSG00000017817	Jph2	0.0540078	NA	No_Change
ENSMUSG00000017830	Dhx58	-0.242106	0.298183	No_Change
ENSMUSG00000017831	Rab5a	-0.167162	0.197832	No_Change
ENSMUSG00000017832	Hspb9	-0.0187114	NA	No_Change
ENSMUSG00000017837	Nkiras2	-0.165433	0.262433	No_Change
ENSMUSG00000017843	Ppp2r5c	0.0196912	0.854241	No_Change
ENSMUSG00000017858	Ift52	0.046347	0.816872	No_Change
ENSMUSG00000017861	Mybl2	0.1516	0.0023881	No_Change
ENSMUSG00000017868	Sgk2	0.123055	NA	No_Change
ENSMUSG00000017897	Eya2	0.109886	0.348631	No_Change
ENSMUSG00000017929	B4galt5	-0.174107	0.170776	No_Change
ENSMUSG00000017943	Gdap1l1	-0.0783142	0.704346	No_Change
ENSMUSG00000017950	Hnf4a	0.168719	0.389159	No_Change
ENSMUSG00000017969	Ptgis	-0.296056	0.218715	No_Change
ENSMUSG00000017978	Cadps2	0.103531	0.454565	No_Change
ENSMUSG00000017999	Ddx27	-0.253129	0.000450341	No_Change
ENSMUSG00000018001	Cyth3	0.130847	0.501576	No_Change
ENSMUSG00000018008	Cyth4	0.0182621	0.892067	No_Change
ENSMUSG00000018012	Rac3	-0.221856	0.328544	No_Change
ENSMUSG00000018040	Rrp7a	0.115489	0.41906	No_Change
ENSMUSG00000018042	Cyb5r3	-0.167822	0.029323	No_Change
ENSMUSG00000018068	Ints2	0.0506689	0.760513	No_Change
ENSMUSG00000018076	Med13l	-0.229957	0.00155987	No_Change
ENSMUSG00000018102	H2bc4	0.217643	0.213916	No_Change
ENSMUSG00000018126	Baiap2l2	-0.250816	0.262034	No_Change
ENSMUSG00000018143	Mafk	-0.230352	0.293771	No_Change
ENSMUSG00000018160	Med1	0.359792	0.000258214	No_Change
ENSMUSG00000018166	Erbb3	-0.789907	1.09608e-07	No_Change
ENSMUSG00000018167	Stard3	-0.149466	0.457614	No_Change
ENSMUSG00000018168	Ikzf3	0.0171231	NA	No_Change
ENSMUSG00000018169	Mfng	-0.0545734	0.835364	No_Change
ENSMUSG00000018171	Vmp1	0.0617073	0.735755	No_Change
ENSMUSG00000018189	Uchl5	-0.106343	0.43192	No_Change
ENSMUSG00000018196	Glrx2	-0.0260294	0.921999	No_Change
ENSMUSG00000018199	Ro60	0.0158682	0.942498	No_Change
ENSMUSG00000018209	Stk4	-0.0196802	0.894606	No_Change
ENSMUSG00000018217	Pmp22	-0.325366	0.153087	No_Change
ENSMUSG00000018238	Gdf9	-0.0336137	NA	No_Change
ENSMUSG00000018239	Zcchc10	-0.00879151	0.973144	No_Change
ENSMUSG00000018263	Tbx5	-0.0111821	NA	No_Change
ENSMUSG00000018286	Psmb6	0.0615004	0.492476	No_Change
ENSMUSG00000018287	Spag7	0.0649199	0.636478	No_Change
ENSMUSG00000018293	Pfn1	-0.296526	3.39761e-08	No_Change
ENSMUSG00000018322	Tomm34	-0.447031	1.64241e-05	No_Change
ENSMUSG00000018326	Ywhab	0.0530265	0.610089	No_Change
ENSMUSG00000018334	Ksr1	-0.0912743	0.640929	No_Change
ENSMUSG00000018339	Gpx3	-0.0651305	0.786891	No_Change
ENSMUSG00000018340	Anxa6	-0.989323	3.54833e-37	No_Change
ENSMUSG00000018347	Zkscan6	-0.214362	0.342505	No_Change
ENSMUSG00000018362	Kpna2	0.104352	0.190135	No_Change
ENSMUSG00000018363	Smurf2	0.0854506	0.526137	No_Change
ENSMUSG00000018372	Cep95	0.153244	0.424753	No_Change
ENSMUSG00000018377	Vezf1	0.0067545	0.973349	No_Change
ENSMUSG00000018378	Cuedc1	0.276795	0.183418	No_Change
ENSMUSG00000018379	Srsf1	0.0375548	0.650981	No_Change
ENSMUSG00000018381	Abi3	-0.162093	0.282882	No_Change
ENSMUSG00000018387	Shroom1	0.0577364	NA	No_Change
ENSMUSG00000018395	Kif3a	0.347397	0.00390627	No_Change
ENSMUSG00000018398	Septin8	0.436012	0.000914005	No_Change
ENSMUSG00000018401	Mtmr4	-0.557621	8.73042e-07	No_Change
ENSMUSG00000018405	Mrm1	0.0292121	0.912435	No_Change
ENSMUSG00000018411	Mapt	-0.427032	0.013765	No_Change
ENSMUSG00000018412	Kansl1	-0.0246589	0.873267	No_Change
ENSMUSG00000018415	Gid4	-0.0959562	0.500689	No_Change
ENSMUSG00000018417	Myo1b	-0.138811	0.183664	No_Change
ENSMUSG00000018425	Dhx40	0.00483631	0.985674	No_Change
ENSMUSG00000018427	Ypel2	-1.00242	1.02244e-07	KO_down
ENSMUSG00000018428	Akap1	-0.526604	6.41786e-20	No_Change
ENSMUSG00000018433	Nol11	0.0695179	0.542687	No_Change
ENSMUSG00000018442	Derl2	-0.0813278	0.681523	No_Change
ENSMUSG00000018446	C1qbp	-0.0395902	0.6586	No_Change
ENSMUSG00000018449	Rpain	0.0627359	0.779145	No_Change
ENSMUSG00000018451	6330403K07Rik	0.0104287	0.958145	No_Change
ENSMUSG00000018459	Slc13a3	-0.00236496	NA	No_Change
ENSMUSG00000018470	Kcnab3	-0.249169	0.28422	No_Change
ENSMUSG00000018474	Chd3	-0.0548306	0.750049	No_Change
ENSMUSG00000018476	Kdm6b	0.0360879	0.763011	No_Change
ENSMUSG00000018479	1700125H20Rik	0.000840279	NA	No_Change
ENSMUSG00000018481	Appbp2	0.0415905	0.745525	No_Change
ENSMUSG00000018486	Wnt9b	0.00630159	NA	No_Change
ENSMUSG00000018500	Adora2b	-0.18512	0.334224	No_Change
ENSMUSG00000018501	Ncor1	0.150795	0.0487487	No_Change
ENSMUSG00000018507	Trpv2	0.130186	0.515696	No_Change
ENSMUSG00000018509	Cenpv	0.152425	0.341477	No_Change
ENSMUSG00000018537	Pcgf2	-0.0647172	0.642409	No_Change
ENSMUSG00000018541	Cwc25	-0.130969	0.450734	No_Change
ENSMUSG00000018543	1700001P01Rik	-0.0257139	NA	No_Change
ENSMUSG00000018547	Pip4k2b	-0.2705	0.00445436	No_Change
ENSMUSG00000018548	Trim37	0.295931	0.000273432	No_Change
ENSMUSG00000018554	Ybx2	0.00139773	0.995871	No_Change
ENSMUSG00000018559	Ctdnep1	0.149577	0.426655	No_Change
ENSMUSG00000018565	Elp5	0.233476	0.128854	No_Change
ENSMUSG00000018566	Slc2a4	-0.00740126	0.979223	No_Change
ENSMUSG00000018567	Gabarap	0.408148	0.00033894	No_Change
ENSMUSG00000018569	Cldn7	-0.629307	0.0102193	No_Change
ENSMUSG00000018570	2810408A11Rik	-0.0029682	0.991847	No_Change
ENSMUSG00000018572	Phf23	0.116582	0.401594	No_Change
ENSMUSG00000018574	Acadvl	-0.0714297	0.6936	No_Change
ENSMUSG00000018581	Dnah11	0.174607	0.280444	No_Change
ENSMUSG00000018583	G3bp1	-0.117713	0.0188646	No_Change
ENSMUSG00000018585	Atox1	-0.500512	0.00189545	No_Change
ENSMUSG00000018589	Glra2	0.00901924	NA	No_Change
ENSMUSG00000018593	Sparc	-0.00373437	0.976182	No_Change
ENSMUSG00000018599	Mief2	-0.021311	0.936857	No_Change
ENSMUSG00000018604	Tbx3	0.830577	7.21825e-27	No_Change
ENSMUSG00000018634	Crhr1	0.000507097	NA	No_Change
ENSMUSG00000018648	Dusp14	-0.787622	0.00398654	No_Change
ENSMUSG00000018651	Tada2a	-0.0180074	0.909995	No_Change
ENSMUSG00000018654	Ikzf1	-0.0209015	0.886324	No_Change
ENSMUSG00000018659	Pnpo	0.197458	0.24147	No_Change
ENSMUSG00000018661	Cog1	-0.0505775	0.812684	No_Change
ENSMUSG00000018666	Cbx1	-0.217738	0.00210915	No_Change
ENSMUSG00000018669	Cdk5rap3	-0.107757	0.317588	No_Change
ENSMUSG00000018672	Copz2	-1.58496	1.93178e-09	KO_down
ENSMUSG00000018677	Slc25a39	-0.32011	1.87137e-06	No_Change
ENSMUSG00000018678	Sp2	-0.146485	0.244782	No_Change
ENSMUSG00000018697	Aatf	-0.00596253	0.977547	No_Change
ENSMUSG00000018698	Lhx1	-0.0464704	NA	No_Change
ENSMUSG00000018707	Dync1h1	-0.0285035	0.61781	No_Change
ENSMUSG00000018727	Cpsf4l	-0.147236	NA	No_Change
ENSMUSG00000018733	Pex12	1.04047	0.00359807	KO_up
ENSMUSG00000018736	Ndel1	-0.0447625	0.799072	No_Change
ENSMUSG00000018740	Slc25a35	-0.369928	0.148331	No_Change
ENSMUSG00000018750	Zbtb4	0.111508	0.481897	No_Change
ENSMUSG00000018752	Tnfsfm13	-0.0888689	0.697396	No_Change
ENSMUSG00000018761	Mpdu1	-0.026843	0.908362	No_Change
ENSMUSG00000018765	Fxr2	-0.494063	4.8934e-16	No_Change
ENSMUSG00000018770	Atp5g3	-0.303132	2.06895e-06	No_Change
ENSMUSG00000018774	Cd68	-1.13328	7.58124e-11	KO_down
ENSMUSG00000018796	Acsl1	-0.590399	2.58261e-09	No_Change
ENSMUSG00000018800	Abca5	0.51295	0.0490301	No_Change
ENSMUSG00000018809	Smyd4	0.186484	0.382143	No_Change
ENSMUSG00000018819	Lsp1	0.04602	NA	No_Change
ENSMUSG00000018820	Zfyve27	-0.228082	0.146744	No_Change
ENSMUSG00000018821	Avpi1	-0.415205	0.00370254	No_Change
ENSMUSG00000018822	Sfrp5	-0.294926	0.111757	No_Change
ENSMUSG00000018830	Myh11	0.082479	0.47347	No_Change
ENSMUSG00000018841	Rad51d	0.0242316	0.91969	No_Change
ENSMUSG00000018845	Unc45b	-0.0151776	NA	No_Change
ENSMUSG00000018846	Pank3	-0.210182	0.102348	No_Change
ENSMUSG00000018848	Rars	-0.284689	0.000118892	No_Change
ENSMUSG00000018849	Wwc1	-0.485868	2.31805e-05	No_Change
ENSMUSG00000018858	Mrpl58	0.29081	0.121559	No_Change
ENSMUSG00000018861	Fdxr	-0.22413	0.217448	No_Change
ENSMUSG00000018865	Sult4a1	-0.684656	3.81649e-06	No_Change
ENSMUSG00000018868	Pnpla5	0.00768115	NA	No_Change
ENSMUSG00000018882	Mrpl45	-0.00819322	0.959246	No_Change
ENSMUSG00000018893	Mb	-0.00791291	NA	No_Change
ENSMUSG00000018899	Irf1	-0.0336953	0.891981	No_Change
ENSMUSG00000018900	Slc22a5	0.11434	0.628419	No_Change
ENSMUSG00000018906	P4ha2	-0.331454	0.0246412	No_Change
ENSMUSG00000018907	Alox12e	0.025101	NA	No_Change
ENSMUSG00000018909	Arrb1	0.109368	0.589972	No_Change
ENSMUSG00000018919	Tm4sf5	-0.0860762	0.608948	No_Change
ENSMUSG00000018920	Cxcl16	0.0684999	0.687324	No_Change
ENSMUSG00000018921	Pelp1	-0.147496	0.0933844	No_Change
ENSMUSG00000018923	Med11	0.0809496	0.737108	No_Change
ENSMUSG00000018924	Alox15	0.0274169	NA	No_Change
ENSMUSG00000018931	Natd1	0.450894	0.00449092	No_Change
ENSMUSG00000018932	Map2k3	-0.412167	3.61574e-05	No_Change
ENSMUSG00000018965	Ywhah	0.133425	0.17774	No_Change
ENSMUSG00000018973	Hoxb1	-0.00793017	NA	No_Change
ENSMUSG00000018974	Sart3	-0.213139	0.00703778	No_Change
ENSMUSG00000018983	E2f2	-0.458908	0.0476928	No_Change
ENSMUSG00000018986	Slfn3	0.249942	0.107028	No_Change
ENSMUSG00000018995	Nars2	0.35194	0.0879792	No_Change
ENSMUSG00000018999	Slc35b4	0.49975	0.00604734	No_Change
ENSMUSG00000019027	Dnah1	0.693303	0.0231133	No_Change
ENSMUSG00000019039	Dalrd3	-0.590942	0.00492744	No_Change
ENSMUSG00000019054	Fis1	-0.0132842	0.950087	No_Change
ENSMUSG00000019055	Plod1	-0.385404	0.000267082	No_Change
ENSMUSG00000019066	Rab3d	-0.0374093	0.874559	No_Change
ENSMUSG00000019080	Mfsd3	0.290335	0.155679	No_Change
ENSMUSG00000019082	Slc25a22	-0.00457568	0.987167	No_Change
ENSMUSG00000019087	Atp6ap1	0.161316	0.184163	No_Change
ENSMUSG00000019088	Dnase1l1	-0.0117001	0.938245	No_Change
ENSMUSG00000019102	Aldh3a1	-0.328174	0.0444886	No_Change
ENSMUSG00000019124	Scrn1	0.482309	0.0183015	No_Change
ENSMUSG00000019132	BC005537	0.292581	0.00197328	No_Change
ENSMUSG00000019139	Isyna1	-0.639109	4.67278e-14	No_Change
ENSMUSG00000019143	Hars2	-0.0319541	0.894432	No_Change
ENSMUSG00000019146	Cacng2	0.0120514	NA	No_Change
ENSMUSG00000019158	Tmem160	-0.267488	0.161278	No_Change
ENSMUSG00000019173	Rab5c	-0.243628	0.0049029	No_Change
ENSMUSG00000019178	Styxl1	0.0363153	NA	No_Change
ENSMUSG00000019179	Mdh2	-0.0846556	0.216948	No_Change
ENSMUSG00000019188	H13	0.0118052	0.963191	No_Change
ENSMUSG00000019189	Rnf145	0.183909	0.183626	No_Change
ENSMUSG00000019194	Scn1b	-0.015625	0.954919	No_Change
ENSMUSG00000019210	Atp6v1e1	-0.0655032	0.622624	No_Change
ENSMUSG00000019214	Chtf18	-0.0809026	0.574778	No_Change
ENSMUSG00000019230	Lhx9	-0.00793017	NA	No_Change
ENSMUSG00000019235	Rps6kl1	-0.457361	0.0815045	No_Change
ENSMUSG00000019254	Ppp1r12c	-0.116813	0.316318	No_Change
ENSMUSG00000019256	Ahr	0.76404	0.00479752	No_Change
ENSMUSG00000019261	Map1s	-0.0712851	0.605048	No_Change
ENSMUSG00000019278	Dpep1	0.0113157	NA	No_Change
ENSMUSG00000019295	Tmem129	0.00853458	0.979054	No_Change
ENSMUSG00000019297	Nop9	0.0521162	0.722373	No_Change
ENSMUSG00000019301	Hsd17b1	0.00410771	NA	No_Change
ENSMUSG00000019302	Atp6v0a1	0.0548005	0.730236	No_Change
ENSMUSG00000019303	Psmc3ip	0.157857	0.439282	No_Change
ENSMUSG00000019312	Grb7	-0.648128	0.000590717	No_Change
ENSMUSG00000019320	Noxo1	0.153161	0.299959	No_Change
ENSMUSG00000019326	Aoc3	-1.73242	0.000236829	KO_down
ENSMUSG00000019338	Zfp687	-0.0840914	0.57085	No_Change
ENSMUSG00000019359	Gdpd2	1.60828	0.0117024	KO_up
ENSMUSG00000019362	D8Ertd738e	-0.285042	0.0384518	No_Change
ENSMUSG00000019368	Sec14l4	-0.00831205	0.967519	No_Change
ENSMUSG00000019370	Calm3	0.00956276	0.936101	No_Change
ENSMUSG00000019373	Cops3	0.34884	0.000313167	No_Change
ENSMUSG00000019428	Fkbp8	-0.0299476	0.79867	No_Change
ENSMUSG00000019429	Ffar3	0.0446338	NA	No_Change
ENSMUSG00000019432	Ddx39b	-0.0684105	0.487772	No_Change
ENSMUSG00000019433	Gipc1	-0.0354906	0.799296	No_Change
ENSMUSG00000019437	Tlcd1	0.108662	0.650157	No_Change
ENSMUSG00000019461	Plscr3	-0.0160742	0.952776	No_Change
ENSMUSG00000019464	Ptger1	-0.0753257	0.599408	No_Change
ENSMUSG00000019467	Arhgef25	-0.501304	0.00118008	No_Change
ENSMUSG00000019470	Xab2	-0.0747259	0.50896	No_Change
ENSMUSG00000019471	Cdc37	-0.0876709	0.188445	No_Change
ENSMUSG00000019478	Rab4a	-0.132656	0.403249	No_Change
ENSMUSG00000019487	Trip10	-0.265469	0.0310033	No_Change
ENSMUSG00000019494	Cops6	-0.121403	0.25719	No_Change
ENSMUSG00000019505	Ubb	-0.162965	0.000415543	No_Change
ENSMUSG00000019518	Ap4m1	-0.0293759	0.914574	No_Change
ENSMUSG00000019528	Gyg	0.202401	0.341879	No_Change
ENSMUSG00000019539	Rcn3	-0.978036	5.17287e-24	No_Change
ENSMUSG00000019558	Slc6a8	0.025325	0.884018	No_Change
ENSMUSG00000019564	Arid3a	-0.167056	0.305887	No_Change
ENSMUSG00000019577	Pdk4	-0.267278	0.139114	No_Change
ENSMUSG00000019578	Ubxn6	0.330235	0.0727348	No_Change
ENSMUSG00000019579	Mydgf	-0.209724	0.161077	No_Change
ENSMUSG00000019590	Cyb561	-0.537616	0.00218897	No_Change
ENSMUSG00000019647	Sema6a	0.309811	0.149039	No_Change
ENSMUSG00000019659	Ccdc12	-0.0062216	0.982826	No_Change
ENSMUSG00000019689	Fmc1	-0.0526206	0.839017	No_Change
ENSMUSG00000019699	Akt3	0.0598914	0.768774	No_Change
ENSMUSG00000019710	Mrpl24	0.0130125	0.933602	No_Change
ENSMUSG00000019715	Gle1	0.0514919	0.746727	No_Change
ENSMUSG00000019718	L3hypdh	-0.00925056	0.971077	No_Change
ENSMUSG00000019726	Lyst	0.217055	0.24092	No_Change
ENSMUSG00000019731	Slc35e1	-0.149654	0.262594	No_Change
ENSMUSG00000019732	Calr3	-0.00743146	0.977984	No_Change
ENSMUSG00000019734	Tmc4	0.122318	0.577047	No_Change
ENSMUSG00000019737	Syne4	-0.473339	0.013517	No_Change
ENSMUSG00000019738	Polr2i	-0.0422375	0.840944	No_Change
ENSMUSG00000019761	Krt10	-0.0116836	0.930549	No_Change
ENSMUSG00000019763	Rmnd1	0.541879	0.0010738	No_Change
ENSMUSG00000019767	Ccdc170	0.10318	0.662574	No_Change
ENSMUSG00000019768	Esr1	0.103903	NA	No_Change
ENSMUSG00000019769	NA	1.52437	3.53462e-18	KO_up
ENSMUSG00000019773	Fbxo5	0.0157175	0.931771	No_Change
ENSMUSG00000019774	Mtrf1l	0.174128	0.43803	No_Change
ENSMUSG00000019775	Rgs17	-0.133809	0.53917	No_Change
ENSMUSG00000019777	Hdac2	-0.0459946	0.668904	No_Change
ENSMUSG00000019779	Frk	0.159062	NA	No_Change
ENSMUSG00000019782	Rwdd1	-0.0902949	0.570757	No_Change
ENSMUSG00000019785	Clvs2	-0.132278	NA	No_Change
ENSMUSG00000019789	Hey2	0.012365	0.948799	No_Change
ENSMUSG00000019790	Stxbp5	-0.152531	0.423622	No_Change
ENSMUSG00000019791	Hint3	0.243157	0.278307	No_Change
ENSMUSG00000019792	Trmt11	0.404861	0.0752827	No_Change
ENSMUSG00000019794	Katna1	-0.0524182	0.739174	No_Change
ENSMUSG00000019795	Pcmt1	-0.100104	0.554332	No_Change
ENSMUSG00000019796	Lrp11	-0.344826	0.000194018	No_Change
ENSMUSG00000019797	Mtres1	0.0550471	0.780769	No_Change
ENSMUSG00000019802	Sec63	0.146807	0.253126	No_Change
ENSMUSG00000019803	Nr2e1	0.00397056	NA	No_Change
ENSMUSG00000019804	Snx3	0.0164632	0.892333	No_Change
ENSMUSG00000019806	Aig1	0.189966	0.407949	No_Change
ENSMUSG00000019808	Adat2	0.0190781	0.946891	No_Change
ENSMUSG00000019809	Pex3	0.296998	0.141309	No_Change
ENSMUSG00000019810	Fuca2	0.801706	1.00449e-05	No_Change
ENSMUSG00000019813	Cep57l1	0.243904	0.162907	No_Change
ENSMUSG00000019814	Ltv1	0.302226	0.0041266	No_Change
ENSMUSG00000019817	Plagl1	0.437032	0.0582274	No_Change
ENSMUSG00000019818	Cd164	0.412727	4.78391e-15	No_Change
ENSMUSG00000019820	Utrn	0.755515	2.15629e-24	No_Change
ENSMUSG00000019822	Smpd2	-0.295453	0.116134	No_Change
[truncated: 19,314 more rows]
