# Supplementary material for: Comparative functional genomics identifies unique molecular features of EPSCs
Source: Life Sci Alliance. 2022 Aug 12;5(11):e202201608. doi: 10.26508/lsa.202201608 (PMC9378845; doi:10.26508/lsa.202201608)
Supplement: Supplementary file 6 [file LSA-2022-01608_TableS6.xlsx]

## Sheet: Antibodies
REAGENT or RESOURCE	SOURCE	IDENTIFIER
Anti-Sox-2 (Y-17)	Santa Cruz Biotechnology	Cat# sc-17320; RRID:AB_2286684
Anti-Oct-3/4 (C-10)	Santa Cruz Biotechnology	Cat# sc-5279; RRID:AB_628051
Anti-Nanog (BL1662)	Thermo Fisher Scientific	Cat# A300-397A; RRID: AB_386108
Anti-Vinculin	Abcam	Cat# ab129002, RRID:AB_11144129
Anti-Histone H3 (acetyl K27) antibody- ChIP Grade	Abcam	Cat# ab4729, RRID:AB_2118291
Anti-Histone H3 (mono methyl K4) antibody	Abcam	Cat# ab8895, RRID:AB_306847
Anti-TFAP2C	Proteintech	Cat# 14572-1-AP, AB_2271424

## Sheet: Experimental Cells 
REAGENT or RESOURCE	SOURCE	IDENTIFIER
mESC line J1	ATCC	SCRC-1010
D-EPSC	This study	N/A
L-EPSC	This study	N/A
2TS22C-Sox2 cKO ESCs	(Masui et al. 2007)	N/A
ZHBTc4-Oct4 cKO ESCs	(Niwa et al. 2000)	N/A
NgcKO-Nanog cKO ESCs	(Das et al. 2011)	N/A
Oct4-FKBP mESC line	(Boija et al. 2018)	N/A
Tfap2a/c dKO cells	(Pastor et al. 2018)	N/A

## Sheet: Chemicals
REAGENT or RESOURCE	SOURCE	IDENTIFIER
DMEM	Thermo Fisher Scientific	Cat# 11965-118
Heat inactivated FBS	Corning/VWR	Cat# 35-010-cv
Dialyzed FBS for SILAC	Thermo Fisher Scientific	Cat# 88440
KnockOut Serum Replacement	Thermo Fisher Scientific	Cat# A3181502
DMEM/F-12	Thermo Fisher Scientific	Cat# 11330-032
N-2 Supplement	Thermo Fisher Scientific	Cat# 17502-048
B-27 Supplement (50x), Serum-free	Thermo Fisher Scientific	Cat# 17504-044
Penicillin/Streptomycin 100X solution	Thermo Fisher Scientific	Cat# 15140-122
L-Glutamine 100X	Thermo Fisher Scientific	Cat# 25030-081
MEM Non-Essential AA	Thermo Fisher Scientific	Cat# 1140-050
β-Mercaptoethanol	Sigma-Aldrich	Cat# M6250
Recombinant Human LIF	Peprotech	Cat# 300-05
Trypsin-EDTA (0.05%), phenol red	Thermo Fisher Scientific	Cat# 25300-054
Accutase cell detachment solution	Thermo Fisher Scientific	Cat# AT-104
CHIR99021	Sigma	SML1046-25MG
PD0325901	LC Laboratories	P968850MG
(S)-(+)-Dimethindene maleate	Tocris	Cat# 1425
Minocycline, Hydrochloride	Santa Cruz	Cat# sc-203339
A-419259 trihydrochloride	Santa Cruz	sc-361094
XAV939	Sigma	X3004-5MG
JNK Inhibitor VIII	Tocris	Cat# 3222
SB203580	Tocris	Cat# 1402

## Sheet: Critical Commercial Assays
REAGENT or RESOURCE	SOURCE	IDENTIFIER
Universal Plus mRNA-Seq with NuQuant	TECAN	Cat# 0520-A01
TruePrep DNA Library Prep Kit V2 for Illumina	Vazymebiotech	Cat# TD502
NEBNext® Ultra™ II DNA Library Prep Kit for Illumina	NEB	Cat# E7645S

## Sheet: Software and Algorithms
Software and Algorithms	Version	Source
Trim Galore	v.0.6.4	https://github.com/FelixKrueger/TrimGalore
STAR	v2.7.9a	(Dobin et al. 2013)
Htseq	v.0.11.2	(Anders et al. 2015)
DESeq2	v.4.1.1	(Love et al. 2014)
GSEA	v.4.2.2	(Mootha et al. 2003; Subramanian et al. 2005)
Diffbind	v.3.4.11	http://bioconductor.org/packages/release/bioc/vignettes/DiffBind/inst/doc/DiffBind.pdf and (Ross-Innes et al. 2012)
Homer	v.4.11.1	(Heinz et al. 2010)
Bedtools	v.2.30.0	(Quinlan and Hall 2010)
EaSeq	v.1.111	(Lerdrup et al. 2016)
Metascape		(Zhou et al. 2019)
Samtools	v.1.14	(Li et al. 2009)
